# Supplementary material for: Monocyte adhesion to atherosclerotic matrix proteins is enhanced by Asn-Gly-Arg deamidation
Source: PubMed Central journal article supplement (PMC5515959; doi:10.1038/s41598-017-06202-2), 2017-07-18
Supplement: 41598_2017_6202_MOESM1_ESM.pdf [file 41598_2017_6202_MOESM1_ESM.pdf]

**Monocyte adhesion to atherosclerotic matrix proteins is enhanced by Asn-Gly-Arg deamidation**

Bamaprasad Dutta<sup>1a</sup>, Jung Eun Park<sup>1a</sup>, Subodh Kumar<sup>1</sup>, Piliang Hao<sup>1</sup>, Xavier Gallart-Palau<sup>1</sup>, Aida Serra<sup>1</sup>, Yan Ren<sup>1</sup>, Vitaly Sorokin<sup>2,3</sup>, Chuen Neng Lee<sup>2,3</sup>, Hee Hwa Ho<sup>4</sup>, Dominique de Kleijn<sup>3</sup>, and Siu Kwan Sze<sup>1\*</sup>

<sup>1</sup>School of Biological Sciences, Nanyang Technological University, 60 Nanyang Drive, Singapore 637551.

<sup>2</sup>Department of Surgery, Yong Loo Lin School of Medicine, National University of Singapore, Singapore 119228.

<sup>3</sup>Department of Cardiac, Thoracic and Vascular Surgery, National University Heart Centre, National University Health System, Singapore 119228.

<sup>4</sup>Department of Cardiology, Tan Tock Seng Hospital, 11 Jalan Tan Tock Seng, Singapore 308433.

<sup>a</sup>These authors contributed equally to this work.

**Running Title:** IsoDGR enhances monocyte adhesion to ECM proteins

[A2M\\_K.EQAPHCICAN#GR.Q\\_78.32](#)  
[A2M\\_K.EQAPHCICANGR.Q\\_25.55](#)  
[A2M\\_R.VSVOLEASPAFLAVPVEKEQAPHCICANGR.Q\\_81.54](#)  
[APOD\\_K.IPTTFEN#GR.C\\_36.94](#)  
[APOD\\_R.WYEIEKIPTTFEN#GR.C\\_99.47](#)  
[APOD\\_R.WYEIEKIPTTFEN#GR.C\\_87.09](#)  
[APOD\\_R.WYEIEKIPTTFENGR.C\\_65.46](#)  
[APOD\\_R.WYEIEKIPTTFENGR.C\\_54.48](#)  
[CRKL\\_R.MNINGQWEGEVN#GR.K\\_15.45](#)  
[DUSP3\\_R.AADFIDOALAQKN#GR.V\\_90.75](#)  
[DUSP3\\_R.AADFIDOALAQKNGR.V\\_82.38](#)  
[EMILIN1\\_R.AVETA FN#GR.Q\\_56.24](#)  
[F9\\_K.NCELDVTCNIKN#GR.C\\_117.25](#)  
[F9\\_K.NCELDVTCNIKNGRCEQFCK.N\\_17.62](#)  
[FBN1\\_R.DIDECLQN#GR.I\\_73.28](#)  
[FBN1\\_R.DIDECLQNGR.I\\_41.99](#)  
[FBN1\\_R.DIDECLQN#GRICN#N#GR.C\\_58.50](#)  
[FBN1\\_R.DIDECLQN#GRICN#NGR.C\\_79.97](#)  
[FBN1\\_R.DIDECLQ#N#GRICNNGR.C\\_48.47](#)  
[FBN1\\_R.DIDECLQN#GRICNNGR.C\\_60.40](#)  
[FBN1\\_R.DIDECLQN#GRICNNGR.C\\_58.46](#)  
[FBN1\\_R.DIDECLQNGRICN#GR.C\\_25.26](#)  
[FBN1\\_K.DIN#ECETPGICM#N#GR.C\\_27.60](#)  
[FBN1\\_K.DINECETPGICM#N#GR.C\\_73.25](#)  
[FBN1\\_K.DINECETPGICM#NGR.C\\_74.80](#)  
[FBN1\\_K.DINECETPGICM#NGR.C\\_34.06](#)  
[FBN1\\_K.DINECETPGICMN#GR.C\\_101.53](#)  
[FBN1\\_K.DINECETPGICMN#GR.C\\_20.31](#)  
[FBN1\\_K.DINECETPGICMNGR.C\\_76.65](#)  
[FBN1\\_K.DINECETPGICMNGR.C\\_57.72](#)  
[FBN1\\_R.RPDGEGCVDENECQTKPGICEN#GR.C\\_92.41](#)  
[FBN1\\_R.RPDGEGCVDENECQ#TKPGICENGR.C\\_24.31](#)  
[FBN1\\_R.RPDGEGCVDENECQTKPGICENGR.C\\_94.09](#)  
[FBN1\\_R.RPDGEGCVDENECQTKPGICENGR.C\\_81.29](#)  
[FBN1\\_R.YCKDIN#ECETPGICM#N#GR.C\\_16.83](#)  
[FBN1\\_R.YCKDINECETPGICM#N#GR.C\\_53.12](#)  
[FBN1\\_R.YCKDINECETPGICM#NGR.C\\_57.16](#)  
[FBN1\\_R.YCKDINECETPGICMN#GR.C\\_64.61](#)  
[FBN1\\_R.YCKDINECETPGICMNGR.C\\_68.75](#)  
[FBN1\\_R.YCKDINECETPGICMNGR.C\\_38.90](#)  
[FCGBP\\_R.FAVLQENVAWGN#GR.V\\_52.75](#)  
[FGB\\_K.EDGGGWYWRCHAAN#PN#GR.Y\\_24.14](#)  
[FGB\\_K.EDGGGWYWRCHAANPNGR.Y\\_29.11](#)  
[FGG\\_K.EGFGHLSPTGTTEFWLGNEKIHLISTQ#SAIPYALRVELEDWNGR.T\\_50.31](#)  
[FGG\\_K.EGFGHLSPTGTTEFWLGNEKIHLISTQ#SAIPYALRVELEDWNGR.T\\_18.91](#)  
[FGG\\_K.EGFGHLSPTGTTEFWLGNEKIHLISTQSAIPYALRVELEDWNGR.T\\_52.88](#)  
[FGG\\_K.EGFGHLSPTGTTEFWLGNEKIHLISTQSAIPYALRVELEDWNGR.T\\_51.95](#)  
[FGG\\_K.IHLISTQSAIPYALRVELEDWN#GR.T\\_30.26](#)  
[FGG\\_K.IHLISTQSAIPYALRVELEDWNGR.T\\_96.66](#)  
[FGG\\_K.IHLISTQSAIPYALRVELEDWNGR.T\\_85.82](#)  
[FGG\\_K.IHLISTQSAIPYALRVELEDWNGR.T\\_22.99](#)  
[FGG\\_R.VELEDWN#GR.T\\_74.70](#)  
[FGG\\_R.VELEDWNGR.T\\_67.56](#)

[FGG\\_R.VELEDWN#GRTSTADYAM#FK.V\\_84.50](#)  
[FGG\\_R.VELEDWN#GRTSTADYAMFK.V\\_121.73](#)  
[FGG\\_R.VELEDWN#GRTSTADYAMFK.V\\_27.53](#)  
[FGG\\_R.VELEDWNGRTSTADYAMFK.V\\_119.50](#)  
[FGG\\_R.VELEDWNGRTSTADYAMFK.V\\_37.83](#)  
[FN1\\_R.CTCVGN#GRGEWTCIAYSQLR.D\\_83.07](#)  
[FN1\\_R.CTCVGN#GRGEWTCIAYSQLR.D\\_111.97](#)  
[FN1\\_R.CTCVGN#GRGEWTCIAYSQLR.D\\_34.30](#)  
[FN1\\_K.DNRGN#LLOCICTGN#GR.G\\_55.68](#)  
[FN1\\_K.DNRGN#LLOCICTGN#GRGEWK.C\\_42.00](#)  
[FN1\\_R.EDRVPHSRN#SITLTNLTPGTEYVVSIVALN#GR.E\\_50.94](#)  
[FN1\\_R.EDRVPHSRN#SITLTNLTPGTEYVVSIVALN#GR.E\\_48.67](#)  
[FN1\\_R.GN#LLOCICTGN#GR.G\\_18.29](#)  
[FN1\\_R.GN#LLOCICTGN#GR.G\\_78.25](#)  
[FN1\\_R.GN#LLOCICTGN#GR.G\\_83.87](#)  
[FN1\\_R.GN#LLOCICTGN#GR.G\\_44.49](#)  
[FN1\\_R.GN#LLOCICTGN#GRGEWK.C\\_66.81](#)  
[FN1\\_R.GN#LLOCICTGN#GRGEWK.C\\_24.28](#)  
[FN1\\_R.GN#LLOCICTGN#GRGEWK.C\\_17.26](#)  
[FN1\\_R.GN#LLOCICTGN#GRGEWK.C\\_107.35](#)  
[FN1\\_R.GN#LLOCICTGN#GRGEWK.C\\_73.41](#)  
[FN1\\_R.GN#LLOCICTGN#GRGEWK.C\\_112.25](#)  
[FN1\\_R.GN#LLOCICTGN#GRGEWK.C\\_93.00](#)  
[FN1\\_R.GN#LLOCICTGN#GRGEWK#CER.H\\_54.81](#)  
[FN1\\_R.GN#LLOCICTGN#GRGEWK#CER.H\\_52.57](#)  
[FN1\\_R.NSITLTNLTPGTEYVVSIVALN#GR.E\\_41.32](#)  
[FN1\\_R.NSITLTNLTPGTEYVVSIVALN#GR.E\\_98.67](#)  
[FN1\\_R.NSITLTNLTPGTEYVVSIVALN#GR.E\\_71.68](#)  
[FN1\\_R.N#SITLTNLTPGTEYVVSIVALN#GR.E\\_41.62](#)  
[FN1\\_R.NSITLTNLTPGTEYVVSIVALN#GR.E\\_39.07](#)  
[FN1\\_R.NSITLTNLTPGTEYVVSIVALN#GR.E\\_112.83](#)  
[FN1\\_R.NSITLTNLTPGTEYVVSIVALN#GR.E\\_103.29](#)  
[FN1\\_R.NSITLTNLTPGTEYVVSIVALN#GREESPLLIGQOSTVSDVPR.D\\_47.29](#)  
[FN1\\_R.NSITLTNLTPGTEYVVSIVALN#GREESPLLIGQOSTVSDVPR.D\\_46.43](#)  
[FN1\\_R.NSITLTNLTPGTEYVVSIVALN#GREESPLLIGQOSTVSDVPR.D\\_106.04](#)  
[FN1\\_R.NSITLTNLTPGTEYVVSIVALN#GREESPLLIGQOSTVSDVPR.D\\_21.59](#)  
[FN1\\_R.NSITLTNLTPGTEYVVSIVALN#GREESPLLIGQOSTVSDVPR.D\\_80.84](#)  
[FN1\\_R.NSITLTNLTPGTEYVVSIVALN#GREESPLLIGQOSTVSDVPR.D\\_30.47](#)  
[FN1\\_K.QM#LCTCLGNGVSCOETA#VTQTYGGNSNGEPCVLPFTYNGR.T\\_32.03](#)  
[FN1\\_K.QM#LCTCLGNGVSCOETA#VTQTYGGNSNGEPCVLPFTYNGR.T\\_31.92](#)  
[FN1\\_K.QMLCTCLGNGVSCOETA#VTQTYGGNSNGEPCVLPFTYNGR.T\\_42.35](#)  
[FN1\\_K.QMLCTCLGNGVSCOETA#VTQTYGGNSNGEPCVLPFTYNGR.T\\_38.88](#)  
[FN1\\_K.QMLCTCLGNGVSCOETA#VTQTYGGNSNGEPCVLPFTYNGR.T\\_37.18](#)  
[FN1\\_K.QMLCTCLGNGVSCOETA#VTQTYGGNSNGEPCVLPFTYNGR.T\\_26.29](#)  
[FN1\\_K.QMLCTCLGNGVSCOETA#VTQTYGGNSNGEPCVLPFTYNGR.T\\_75.08](#)  
[FN1\\_K.QMLCTCLGNGVSCOETA#VTQTYGGNSNGEPCVLPFTYNGR.T\\_68.34](#)  
[FN1\\_K.TQ#GN#KQM#LCTCLGNGVSCOETA#VTQTYGGNSNGEPCVLPFTYNGR.T\\_33.50](#)  
[FN1\\_K.TQ#GN#KQM#LCTCLGNGVSCOETA#VTQTYGGNSNGEPCVLPFTYNGR.T\\_35.98](#)  
[FN1\\_K.TQGN#KQM#LCTCLGNGVSCOETA#VTQTYGGNSNGEPCVLPFTYNGR.T\\_33.85](#)  
[FN1\\_K.TQGN#KQM#LCTCLGNGVSCOETA#VTQTYGGNSNGEPCVLPFTYNGR.T\\_47.18](#)  
[FN1\\_K.TQGN#KQM#LCTCLGNGVSCOETA#VTQTYGGNSNGEPCVLPFTYNGR.T\\_42.98](#)  
[FN1\\_K.TQGN#KQM#LCTCLGNGVSCOETA#VTQTYGGNSNGEPCVLPFTYNGR.T\\_50.54](#)  
[FNDC1\\_R.QGYN#GRPNVEGK.V\\_28.39](#)  
[FRMD4B -.RN#AN#GRSPN#N#SDK.T\\_26.72](#)

[HAPLN1\\_K.SRYDVFCFTSN#FN#GR.F\\_60.07](#)  
[HAPLN1\\_K.SRYDVFCFTSN#FN#GR.F\\_51.48](#)  
[HAPLN1\\_K.SRYDVFCFTSN#FN#GR.F\\_36.78](#)  
[HAPLN1\\_K.SRYDVFCFTSN#FN#GR.F\\_38.87](#)  
[HAPLN1\\_R.YDVFCFTSN#FN#GR.F\\_81.97](#)  
[HAPLN1\\_R.YDVFCFTSN#FN#GR.F\\_74.53](#)  
[HAPLN1\\_R.YDVFCFTSN#FN#GRFYLIHPTK.L\\_42.62](#)  
[HSPA1B\\_K.LLQDFFN#GR.D\\_36.24](#)  
[HSPA1B\\_K.LLQDFFN#GR.D\\_61.47](#)  
[HSPA1B\\_K.LLQ#DFFN#GRDLN#K.S\\_16.94](#)  
[HSPA1B\\_K.LLQDFFN#GRDLN#K.S\\_20.16](#)  
[HSPA1B\\_K.LLQDFFN#GRDLN#K.S\\_76.44](#)  
[HSPA1B\\_K.LLQDFFN#GRDLN#K.S\\_77.92](#)  
[HSPA1B\\_K.LLQDFFN#GRDLN#K.S\\_20.67](#)  
[HSPA5\\_K.N#GRVEIANDQGNR.I\\_29.83](#)  
[HSPA5\\_K.NGRVEIANDQGNR.I\\_46.32](#)  
[HSPA5\\_K.NGRVEIANDQGNR.I\\_29.51](#)  
[LAMC1\\_R.ATAESAASECLPCDCN#GR.S\\_67.14](#)  
[LAMC1\\_R.ATAESAASECLPCDCN#GR.S\\_105.26](#)  
[LAMC1\\_R.ATAESAASECLPCDCN#GR.S\\_57.93](#)  
[LAMC1\\_R.RATAESAASECLPCDCN#GR.S\\_16.83](#)  
[LAMC1\\_R.RATAESAASECLPCDCN#GR.S\\_57.69](#)  
[LOXL1\\_R.LSVGSVYRPNQ#GR.V\\_34.53](#)  
[LOXL1\\_R.LSVGSVYRPNQ#N#GRGLPDLVPDPN#YVQASTYVQR.A\\_22.57](#)  
[LOXL1\\_R.LSVGSVYRPNQ#N#GRGLPDLVPDPN#YVQASTYVQR.A\\_51.77](#)  
[LOXL1\\_R.LSVGSVYRPNQ#N#GRGLPDLVPDPN#YVQASTYVQR.A\\_31.93](#)  
[LOXL1\\_R.LSVGSVYRPNQ#N#GRGLPDLVPDPN#YVQASTYVQR.A\\_27.71](#)  
[LOXL1\\_R.LSVGSVYRPNQ#N#GRGLPDLVPDPN#YVQASTYVQR.A\\_37.22](#)  
[MYOZ1\\_K.SNGRGGSO#AGGSGSAGQYGS DQOHHLGSGSGAGGTGGPAGQAGR.G\\_39.26](#)  
[MYOZ1\\_K.SN#GRGGSO#AGGSGSAGQYGS DQOHHLGSGSGAGGTGGPAGQAGR.G\\_23.26](#)  
[PLEC\\_K.TLPN#GRDALDGPAAEAPEHSFDGLR.R\\_55.59](#)  
[PLEC\\_K.TLPN#GRDALDGPAAEAPEHSFDGLR.R\\_30.07](#)  
[PLEC\\_K.TLPN#GRDALDGPAAEAPEHSFDGLRR.K\\_62.42](#)  
[PLEC\\_K.TLPN#GRDALDGPAAEAPEHSFDGLRR.K\\_50.89](#)  
[PLEK\\_R.GCVVTSVESNSN#GR.K\\_30.61](#)  
[PLEK\\_R.GCVVTSVESNSN#GR.K\\_66.19](#)  
[PLEK\\_R.GCVVTSVESNSN#GR.K.S\\_31.74](#)  
[PLEK\\_R.GCVVTSVESNSN#GR.K.S\\_46.36](#)  
[PLG\\_K.EAQLPVIEN#KVCN#RYEFLN#GR.V\\_21.77](#)  
[PLG\\_K.EAQLPVIEN#KVCN#RYEFLN#GR.V\\_39.92](#)  
[PLG\\_K.VCN#RYEFLN#GR.V\\_69.38](#)  
[PLG\\_K.VCN#RYEFLN#GR.V\\_48.55](#)  
[PLG\\_K.VCN#RYEFLN#GR.V\\_43.54](#)  
[PLG\\_R.YEFLN#GR.V\\_50.68](#)  
[PLG\\_R.YEFLN#GRVQ#STELCAGHLAGGT DSCQGDSSGGLVCFEK.D\\_17.87](#)  
[PLG\\_R.YEFLN#GRVQ#STELCAGHLAGGT DSCQGDSSGGLVCFEK.D\\_17.87](#)  
[PPL\\_R.SLLDLEN#GR.R\\_53.32](#)  
[PTMA\\_K.EVVVEEAEN#GR.D\\_72.49](#)  
[PTMA\\_K.EVVVEEAEN#GR.D\\_68.80](#)  
[PTMA\\_K.EVVVEEAEN#GR.D\\_34.50](#)  
[SH3KBP1\\_R.KEDGGWEGQIN#GR.R\\_40.89](#)  
[SH3KBP1\\_R.KEDGGWEGQIN#GR.R\\_17.46](#)  
[SHANK2\\_-.FM#N#VPGGGAAAVMMTGYN#GR.C\\_22.07](#)  
[SHANK2\\_-.GMN#VPGGGAAAVMMTGYN#GR.C\\_17.52](#)

[SYNE1\\_R.DLQ#DRLSQMN#GRWDR.V\\_15.81](#)  
[TBC1D1\\_R.KQ#N#LDLLEQLO#VAN#GR.I\\_22.03](#)  
[TNC\\_K.LKVEGYSGTAGDSM#AYHNGR.S\\_129.83](#)  
[TNC\\_K.LKVEGYSGTAGDSM#AYHNGR.S\\_65.30](#)  
[TNC\\_K.LKVEGYSGTAGDSMAYHN#GR.S\\_38.54](#)  
[TNC\\_K.LKVEGYSGTAGDSMAYHNGR.S\\_144.67](#)  
[TNC\\_K.LKVEGYSGTAGDSMAYHNGR.S\\_131.81](#)  
[TNC\\_K.N#GRENFYQNWK.A\\_25.24](#)  
[TNC\\_K.NGRENFYQNWK.A\\_23.12](#)  
[TNC\\_K.NGRENFYQNWK.A\\_18.85](#)  
[TNC\\_K.VEGYSGTAGDSM#AYHNGR.S\\_119.73](#)  
[TNC\\_K.VEGYSGTAGDSMAYHN#GR.S\\_107.61](#)  
[TNC\\_K.VEGYSGTAGDSMAYHNGR.S\\_182.06](#)  
[TNC\\_K.VEGYSGTAGDSMAYHNGR.S\\_148.35](#)  
[TNC\\_R.YKLKVEGYSGTAGDSM#AYHNGR.S\\_28.22](#)  
[TNC\\_R.YKLKVEGYSGTAGDSMAYHNGR.S\\_79.01](#)  
[WISP2\\_R.GALCLLAEDDSSCEVN#GR.L\\_98.82](#)  
[WISP2\\_R.GALCLLAEDDSSCEVN#GR.L\\_52.02](#)  
[WISP2\\_R.GALCLLAEDDSSCEVN#GR.L\\_120.67](#)  
[WISP2\\_R.GALCLLAEDDSSCEVN#GR.L\\_83.85](#)

# Mascot Search Results

## Peptide View

MS/MS Fragmentation of **EQAPHCICANGR**

Found in **P01023** in **uni\_human\_nr**, A2MG\_HUMAN Alpha-2-macroglobulin OS=Homo sapiens GN=A2M PE=1 SV=3

Match to Query 2600: 1412.592732 from(471.871520,3+) intensity(292034.8750) rtinseconds(849) scans(2979) index(1254)

Title: 130809\_HPL\_Human\_Plaque\_BR1\_TR3\_08\_Spectrum022864\_scans\_\_2979\_RTINSECONDS=849

Data file E:\\RAW\\HumanPlaques\\mgf\\T\\1D\\T130809\_HPL\_Human\_Plaque\_BR1\_TR3\_08.mgf

Click mouse within plot area to zoom in by factor of two about that point

Or,  to  Da

Label all possible matches  Label matches used for scoring

Show Y-axis

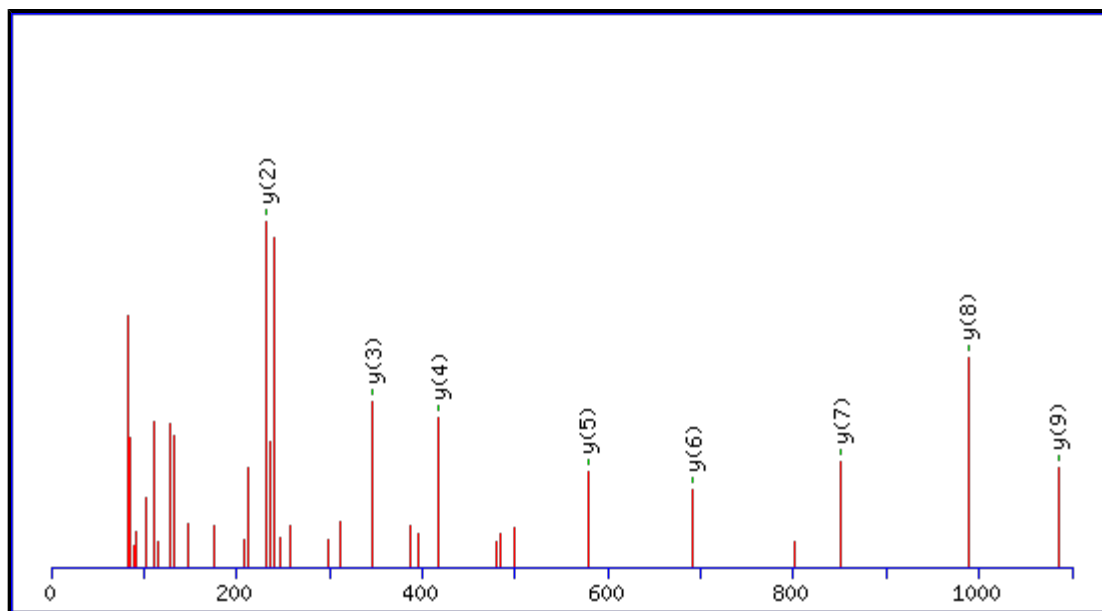

**Monoisotopic mass of neutral peptide Mr(calc):** 1412.5925

**Fixed modifications:** Carbamidomethyl (C) (apply to specified residues or termini only)

**Variable modifications:**

**N10** : Deamidated (NQ)

**Ions Score:** 78 **Expect:** 2.6e-007

**Matches** : 8/108 fragment ions using 9 most intense peaks ([help](#))

| # | b        | b <sup>++</sup> | b <sup>*</sup> | b <sup>*++</sup> | b <sup>0</sup> | b <sup>0++</sup> | Seq. | y                | y <sup>++</sup> | y <sup>*</sup> | y <sup>*++</sup> | #  |
|---|----------|-----------------|----------------|------------------|----------------|------------------|------|------------------|-----------------|----------------|------------------|----|
| 1 | 130.0499 | 65.5286         |                |                  | 112.0393       | 56.5233          | E    |                  |                 |                |                  | 12 |
| 2 | 258.1084 | 129.5579        | 241.0819       | 121.0446         | 240.0979       | 120.5526         | Q    | 1284.5572        | 642.7822        | 1267.5307      | 634.2690         | 11 |
| 3 | 329.1456 | 165.0764        | 312.1190       | 156.5631         | 311.1350       | 156.0711         | A    | 1156.4986        | 578.7530        | 1139.4721      | 570.2397         | 10 |
| 4 | 426.1983 | 213.6028        | 409.1718       | 205.0895         | 408.1878       | 204.5975         | P    | <b>1085.4615</b> | 543.2344        | 1068.4350      | 534.7211         | 9  |
| 5 | 563.2572 | 282.1323        | 546.2307       | 273.6190         | 545.2467       | 273.1270         | H    | <b>988.4087</b>  | 494.7080        | 971.3822       | 486.1947         | 8  |
| 6 | 723.2879 | 362.1476        | 706.2613       | 353.6343         | 705.2773       | 353.1423         | C    | <b>851.3498</b>  | 426.1786        | 834.3233       | 417.6653         | 7  |
| 7 | 836.3720 | 418.6896        | 819.3454       | 410.1763         | 818.3614       | 409.6843         | I    | <b>691.3192</b>  | 346.1632        | 674.2926       | 337.6500         | 6  |

|    |           |          |           |          |           |          |   |                 |          |          |          |   |
|----|-----------|----------|-----------|----------|-----------|----------|---|-----------------|----------|----------|----------|---|
| 8  | 996.4026  | 498.7049 | 979.3761  | 490.1917 | 978.3920  | 489.6997 | C | <b>578.2351</b> | 289.6212 | 561.2086 | 281.1079 | 5 |
| 9  | 1067.4397 | 534.2235 | 1050.4132 | 525.7102 | 1049.4291 | 525.2182 | A | <b>418.2045</b> | 209.6059 | 401.1779 | 201.0926 | 4 |
| 10 | 1182.4667 | 591.7370 | 1165.4401 | 583.2237 | 1164.4561 | 582.7317 | N | <b>347.1674</b> | 174.0873 | 330.1408 | 165.5740 | 3 |
| 11 | 1239.4881 | 620.2477 | 1222.4616 | 611.7344 | 1221.4776 | 611.2424 | G | <b>232.1404</b> | 116.5738 | 215.1139 | 108.0606 | 2 |
| 12 |           |          |           |          |           |          | R | 175.1190        | 88.0631  | 158.0924 | 79.5498  | 1 |

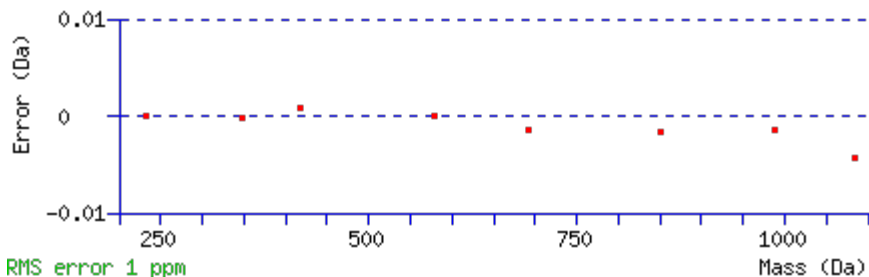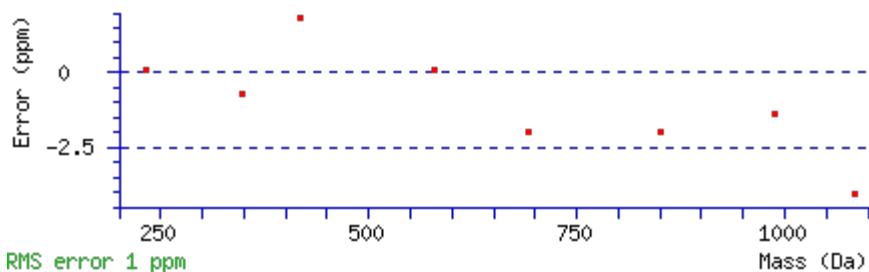

NCBI **BLAST** search of [EQAPHCICANGR](#)

(Parameters: blastp, nr protein database, expect=20000, no filter, PAM30)

Other BLAST [web gateways](#)

**All matches to this query**

| Score | Mr(calc)  | Delta  | Sequence                     |
|-------|-----------|--------|------------------------------|
| 78.3  | 1412.5925 | 0.0002 | <a href="#">EQAPHCICANGR</a> |

Mascot: <http://www.matrixscience.com/>

# Mascot Search Results

## Peptide View

MS/MS Fragmentation of **EQAPHCICANGR**

Found in **P01023** in **uni\_human\_nr**, A2MG\_HUMAN Alpha-2-macroglobulin OS=Homo sapiens GN=A2M PE=1 SV=3

Match to Query 3829: 1411.608912 from(471.543580,3+) intensity(39353.8516) rtinseconds(766) scans(2590) index(988)

Title: 130809\_HPL\_Human\_Plaque\_BR1\_TR3\_02\_Spectrum025514\_scans\_\_2590\_RTINSECONDS=766

Data file E:\\RAW\\HumanPlaques\\mgf\\T\\1D\\T130809\_HPL\_Human\_Plaque\_BR1\_TR3\_02.mgf

Click mouse within plot area to zoom in by factor of two about that point

Or,  to  Da

Label all possible matches  Label matches used for scoring

Show Y-axis

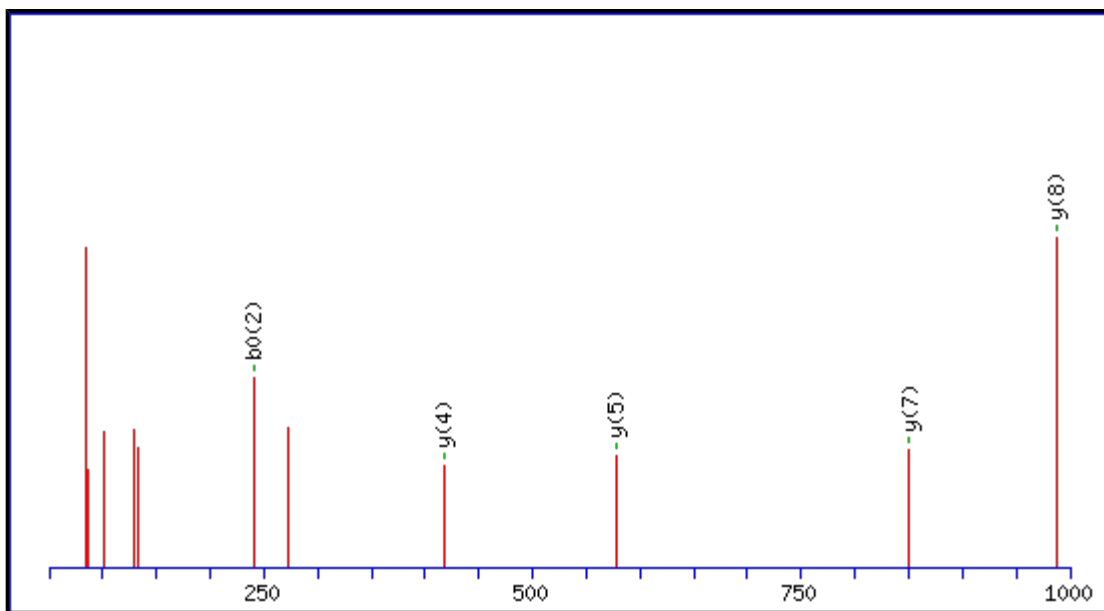

**Monoisotopic mass of neutral peptide Mr(calc):** 1411.6085

**Fixed modifications:** Carbamidomethyl (C) (apply to specified residues or termini only)

**Ions Score:** 26 **Expect:** 0.076

**Matches :** 5/108 fragment ions using 6 most intense peaks ([help](#))

| # | b        | b <sup>++</sup> | b <sup>*</sup> | b <sup>*++</sup> | b <sup>0</sup> | b <sup>0++</sup> | Seq. | y         | y <sup>++</sup> | y <sup>*</sup> | y <sup>*++</sup> | #  |
|---|----------|-----------------|----------------|------------------|----------------|------------------|------|-----------|-----------------|----------------|------------------|----|
| 1 | 130.0499 | 65.5286         |                |                  | 112.0393       | 56.5233          | E    |           |                 |                |                  | 12 |
| 2 | 258.1084 | 129.5579        | 241.0819       | 121.0446         | 240.0979       | 120.5526         | Q    | 1283.5732 | 642.2902        | 1266.5466      | 633.7770         | 11 |
| 3 | 329.1456 | 165.0764        | 312.1190       | 156.5631         | 311.1350       | 156.0711         | A    | 1155.5146 | 578.2609        | 1138.4881      | 569.7477         | 10 |
| 4 | 426.1983 | 213.6028        | 409.1718       | 205.0895         | 408.1878       | 204.5975         | P    | 1084.4775 | 542.7424        | 1067.4509      | 534.2291         | 9  |
| 5 | 563.2572 | 282.1323        | 546.2307       | 273.6190         | 545.2467       | 273.1270         | H    | 987.4247  | 494.2160        | 970.3982       | 485.7027         | 8  |
| 6 | 723.2879 | 362.1476        | 706.2613       | 353.6343         | 705.2773       | 353.1423         | C    | 850.3658  | 425.6865        | 833.3393       | 417.1733         | 7  |
| 7 | 836.3720 | 418.6896        | 819.3454       | 410.1763         | 818.3614       | 409.6843         | I    | 690.3352  | 345.6712        | 673.3086       | 337.1579         | 6  |
| 8 | 996.4026 | 498.7049        | 979.3761       | 490.1917         | 978.3920       | 489.6997         | C    | 577.2511  | 289.1292        | 560.2246       | 280.6159         | 5  |



|    |           |          |           |          |           |          |   |                 |          |          |          |   |
|----|-----------|----------|-----------|----------|-----------|----------|---|-----------------|----------|----------|----------|---|
| 9  | 1067.4397 | 534.2235 | 1050.4132 | 525.7102 | 1049.4291 | 525.2182 | A | <b>417.2205</b> | 209.1139 | 400.1939 | 200.6006 | 4 |
| 10 | 1181.4826 | 591.2450 | 1164.4561 | 582.7317 | 1163.4721 | 582.2397 | N | 346.1833        | 173.5953 | 329.1568 | 165.0820 | 3 |
| 11 | 1238.5041 | 619.7557 | 1221.4776 | 611.2424 | 1220.4935 | 610.7504 | G | 232.1404        | 116.5738 | 215.1139 | 108.0606 | 2 |
| 12 |           |          |           |          |           |          | R | 175.1190        | 88.0631  | 158.0924 | 79.5498  | 1 |

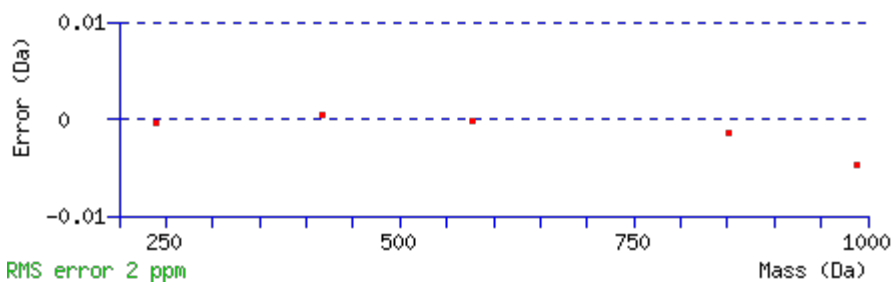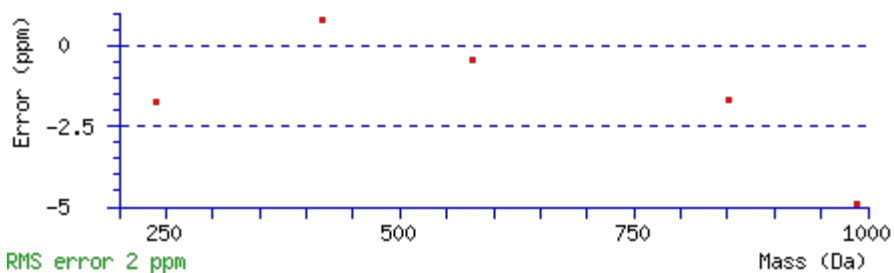

NCBI **BLAST** search of [EQAPHCICANGR](#)

(Parameters: blastp, nr protein database, expect=20000, no filter, PAM30)

Other BLAST [web gateways](#)

**All matches to this query**

| Score | Mr(calc)  | Delta  | Sequence                     |
|-------|-----------|--------|------------------------------|
| 25.6  | 1411.6085 | 0.0004 | <a href="#">EQAPHCICANGR</a> |
| 3.0   | 1410.5986 | 1.0103 | <a href="#">MNESRWTEWR</a>   |

Mascot: <http://www.matrixscience.com/>

# Mascot Search Results

## Peptide View

MS/MS Fragmentation of **VSVQLEASPAFLAVPVEKEQAPHICANGR**

Found in **P01023** in **uni\_human\_nr**, A2MG\_HUMAN Alpha-2-macroglobulin OS=Homo sapiens GN=A2M PE=1 SV=3

Match to Query 19461: 3276.633736 from(820.165710,4+) intensity(4914648.5000) rtinseconds(2303) scans(14636) index(11454)

Title: 130801\_HPL\_Human\_Plaque\_BR2\_TR1\_02\_Spectrum035609\_scans\_14636\_RTINSECONDS=2303

Data file E:\\RAW\\HumanPlaques\\imgf\\T\\1D\\T130801\_HPL\_Human\_Plaque\_BR2\_TR1\_02.mgf

Click mouse within plot area to zoom in by factor of two about that point

Or, to Da  
 Label all possible matches Label matches used for scoring  
 Show Y-axis

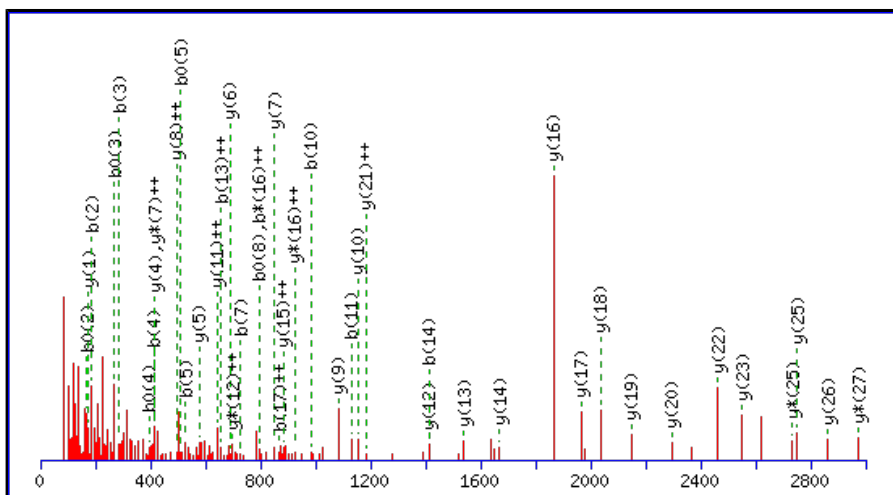

Monoisotopic mass of neutral peptide **Mr(calc): 3276.6383**

Fixed modifications: Carbamidomethyl (C) (apply to specified residues or termini only)

Ions Score: 82 Expect: 5.6e-007

Matches : 44/318 fragment ions using 119 most intense peaks ([help](#))

| #  | b                | b <sup>++</sup> | b <sup>*</sup> | b <sup>*++</sup> | b <sup>0</sup> | b <sup>0++</sup> | Seq. | y                | y <sup>++</sup>  | y <sup>*</sup>   | y <sup>*++</sup> | y <sup>0</sup> | y <sup>0++</sup> | #  |
|----|------------------|-----------------|----------------|------------------|----------------|------------------|------|------------------|------------------|------------------|------------------|----------------|------------------|----|
| 1  | 100.0757         | 50.5415         |                |                  |                |                  | V    |                  |                  |                  |                  |                |                  | 30 |
| 2  | <b>187.1077</b>  | 94.0575         |                |                  | 169.0972       | 85.0522          | S    | 3178.5772        | 1589.7922        | 3161.5507        | 1581.2790        | 3160.5667      | 1580.7870        | 29 |
| 3  | <b>286.1761</b>  | 143.5917        |                |                  | 268.1656       | 134.5864         | V    | 3091.5452        | 1546.2762        | 3074.5186        | 1537.7630        | 3073.5346      | 1537.2709        | 28 |
| 4  | <b>414.2347</b>  | 207.6210        | 397.2082       | 199.1077         | 396.2241       | 198.6157         | Q    | 2992.4768        | 1496.7420        | <b>2975.4502</b> | 1488.2288        | 2974.4662      | 1487.7367        | 27 |
| 5  | <b>527.3188</b>  | 264.1630        | 510.2922       | 255.6498         | 509.3082       | 255.1577         | L    | <b>2864.4182</b> | 1432.7127        | 2847.3916        | 1424.1995        | 2846.4076      | 1423.7075        | 26 |
| 6  | 656.3614         | 328.6843        | 639.3348       | 320.1710         | 638.3508       | 319.6790         | E    | <b>2751.3341</b> | 1376.1707        | <b>2734.3076</b> | 1367.6574        | 2733.3236      | 1367.1654        | 25 |
| 7  | <b>727.3985</b>  | 364.2029        | 710.3719       | 355.6896         | 709.3879       | 355.1976         | A    | 2622.2915        | 1311.6494        | 2605.2650        | 1303.1361        | 2604.2810      | 1302.6441        | 24 |
| 8  | 814.4305         | 407.7189        | 797.4040       | 399.2056         | 796.4199       | 398.7136         | S    | <b>2551.2544</b> | 1276.1309        | 2534.2279        | 1267.6176        | 2533.2439      | 1267.1256        | 23 |
| 9  | 911.4833         | 456.2453        | 894.4567       | 447.7320         | 893.4727       | 447.2400         | P    | <b>2464.2224</b> | 1232.6148        | 2447.1958        | 1224.1016        | 2446.2118      | 1223.6096        | 22 |
| 10 | <b>982.5204</b>  | 491.7638        | 965.4938       | 483.2506         | 964.5098       | 482.7585         | A    | 2367.1696        | <b>1184.0885</b> | 2350.1431        | 1175.5752        | 2349.1591      | 1175.0832        | 21 |
| 11 | <b>1129.5888</b> | 565.2980        | 1112.5623      | 556.7848         | 1111.5782      | 556.2928         | F    | <b>2296.1325</b> | 1148.5699        | 2279.1060        | 1140.0566        | 2278.1220      | 1139.5646        | 20 |
| 12 | 1242.6729        | 621.8401        | 1225.6463      | 613.3268         | 1224.6623      | 612.8348         | L    | <b>2149.0641</b> | 1075.0357        | 2132.0376        | 1066.5224        | 2131.0535      | 1066.0304        | 19 |
| 13 | 1313.7100        | <b>657.3586</b> | 1296.6834      | 648.8454         | 1295.6994      | 648.3533         | A    | <b>2035.9800</b> | 1018.4937        | 2018.9535        | 1009.9804        | 2017.9695      | 1009.4884        | 18 |
| 14 | <b>1412.7784</b> | 706.8928        | 1395.7518      | 698.3796         | 1394.7678      | 697.8876         | V    | <b>1964.9429</b> | 982.9751         | 1947.9164        | 974.4618         | 1946.9324      | 973.9698         | 17 |
| 15 | 1509.8312        | 755.4192        | 1492.8046      | 746.9059         | 1491.8206      | 746.4139         | P    | <b>1865.8745</b> | 933.4409         | 1848.8480        | <b>924.9276</b>  | 1847.8639      | 924.4356         | 16 |
| 16 | 1608.8996        | 804.9534        | 1591.8730      | <b>796.4401</b>  | 1590.8890      | 795.9481         | V    | 1768.8218        | <b>884.9145</b>  | 1751.7952        | 876.4012         | 1750.8112      | 875.9092         | 15 |
| 17 | 1737.9422        | <b>869.4747</b> | 1720.9156      | 860.9614         | 1719.9316      | 860.4694         | E    | <b>1669.7533</b> | 835.3803         | 1652.7268        | 826.8670         | 1651.7428      | 826.3750         | 14 |
| 18 | 1866.0371        | 933.5222        | 1849.0106      | 925.0089         | 1848.0266      | 924.5169         | K    | <b>1540.7107</b> | 770.8590         | 1523.6842        | 762.3457         | 1522.7002      | 761.8537         | 13 |
| 19 | 1995.0797        | 998.0435        | 1978.0532      | 989.5302         | 1977.0692      | 989.0382         | E    | <b>1412.6158</b> | 706.8115         | 1395.5892        | <b>698.2983</b>  | 1394.6052      | 697.8062         | 12 |

|    |           |           |           |           |           |           |   |           |          |           |          |  |  |    |
|----|-----------|-----------|-----------|-----------|-----------|-----------|---|-----------|----------|-----------|----------|--|--|----|
| 20 | 2123.1383 | 1062.0728 | 2106.1117 | 1053.5595 | 2105.1277 | 1053.0675 | Q | 1283.5732 | 642.2902 | 1266.5466 | 633.7770 |  |  | 11 |
| 21 | 2194.1754 | 1097.5913 | 2177.1489 | 1089.0781 | 2176.1648 | 1088.5861 | A | 1155.5146 | 578.2609 | 1138.4881 | 569.7477 |  |  | 10 |
| 22 | 2291.2282 | 1146.1177 | 2274.2016 | 1137.6045 | 2273.2176 | 1137.1124 | P | 1084.4775 | 542.7424 | 1067.4509 | 534.2291 |  |  | 9  |
| 23 | 2428.2871 | 1214.6472 | 2411.2605 | 1206.1339 | 2410.2765 | 1205.6419 | H | 987.4247  | 494.2160 | 970.3982  | 485.7027 |  |  | 8  |
| 24 | 2588.3177 | 1294.6625 | 2571.2912 | 1286.1492 | 2570.3072 | 1285.6572 | C | 850.3658  | 425.6865 | 833.3393  | 417.1733 |  |  | 7  |
| 25 | 2701.4018 | 1351.2045 | 2684.3753 | 1342.6913 | 2683.3912 | 1342.1993 | I | 690.3352  | 345.6712 | 673.3086  | 337.1579 |  |  | 6  |
| 26 | 2861.4325 | 1431.2199 | 2844.4059 | 1422.7066 | 2843.4219 | 1422.2146 | C | 577.2511  | 289.1292 | 560.2246  | 280.6159 |  |  | 5  |
| 27 | 2932.4696 | 1466.7384 | 2915.4430 | 1458.2251 | 2914.4590 | 1457.7331 | A | 417.2205  | 209.1139 | 400.1939  | 200.6006 |  |  | 4  |
| 28 | 3046.5125 | 1523.7599 | 3029.4859 | 1515.2466 | 3028.5019 | 1514.7546 | N | 346.1833  | 173.5953 | 329.1568  | 165.0820 |  |  | 3  |
| 29 | 3103.5340 | 1552.2706 | 3086.5074 | 1543.7573 | 3085.5234 | 1543.2653 | G | 232.1404  | 116.5738 | 215.1139  | 108.0606 |  |  | 2  |
| 30 |           |           |           |           |           |           | R | 175.1190  | 88.0631  | 158.0924  | 79.5498  |  |  | 1  |

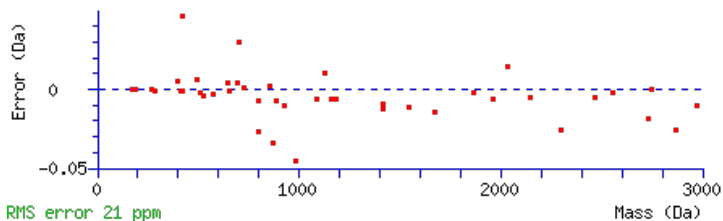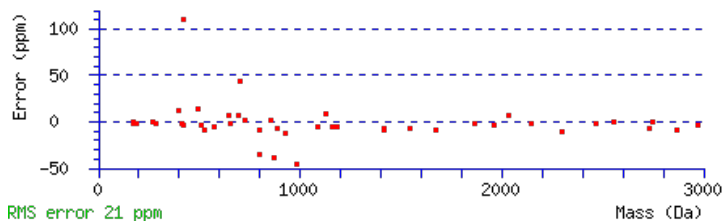

NCBI BLAST search of [VSVQLEASPAFLAVPVEKEQAPHICANGR](#)  
 (Parameters: blastp, nr protein database, expect=20000, no filter, PAM30)  
 Other BLAST [web gateways](#)

All matches to this query

| Score | Mr(calc)  | Delta   | Sequence                                      |
|-------|-----------|---------|-----------------------------------------------|
| 81.5  | 3276.6383 | -0.0046 | <a href="#">VSVQLEASPAFLAVPVEKEQAPHICANGR</a> |

Mascot: <http://www.matrixscience.com/>

# Mascot Search Results

## Peptide View

MS/MS Fragmentation of **IPTTFENGR**

Found in **P05090** in **uni\_human\_nr**, APOD\_HUMAN Apolipoprotein D OS=Homo sapiens GN=APOD PE=1 SV=1

Match to Query 574: 1034.504368 from(518.259460,2+) intensity(789903.0000) rtinseconds(1382) scans(6867) index(4721)

Title: 130809\_HPL\_Human\_Plaque\_BR2\_TR3\_08\_Spectrum026219\_scans\_\_6867\_RTINSECONDS=1382

Data file E:\\RAW\\HumanPlaques\\mgf\\T\\1D\\T130809\_HPL\_Human\_Plaque\_BR2\_TR3\_08.mgf

Click mouse within plot area to zoom in by factor of two about that point

Or,  to  Da

Label all possible matches  Label matches used for scoring

Show Y-axis

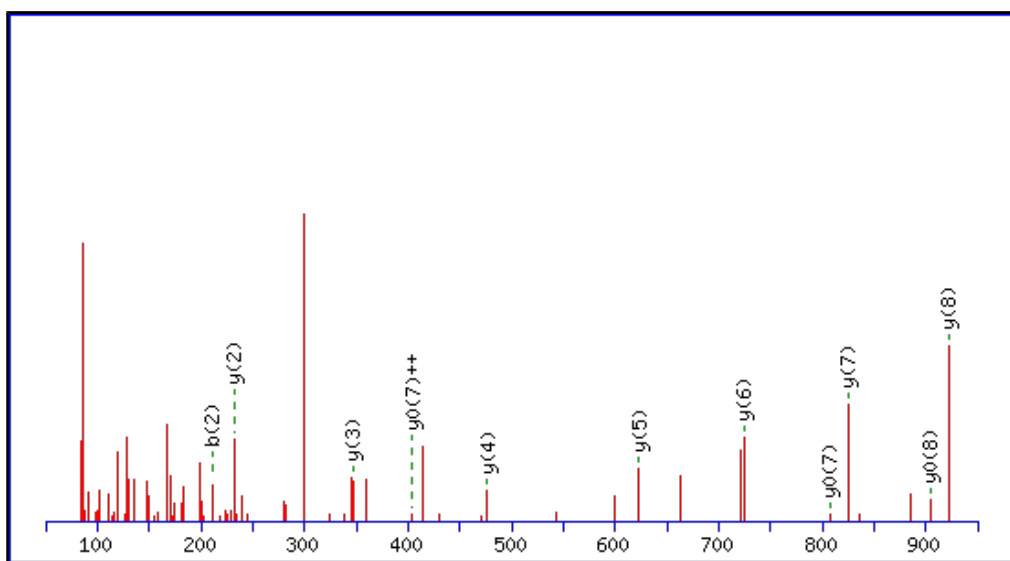

Monoisotopic mass of neutral peptide **Mr(calc):** 1034.5033

**Fixed modifications:** Carbamidomethyl (C) (apply to specified residues or termini only)

**Variable modifications:**

N7 : Deamidated (NQ)

**Ions Score:** 37 **Expect:** 0.015

**Matches :** 11/74 fragment ions using 29 most intense peaks ([help](#))

| # | b               | b <sup>++</sup> | b <sup>*</sup> | b <sup>*++</sup> | b <sup>0</sup> | b <sup>0++</sup> | Seq. | y               | y <sup>++</sup> | y <sup>*</sup> | y <sup>*++</sup> | y <sup>0</sup>  | y <sup>0++</sup> | # |
|---|-----------------|-----------------|----------------|------------------|----------------|------------------|------|-----------------|-----------------|----------------|------------------|-----------------|------------------|---|
| 1 | 114.0913        | 57.5493         |                |                  |                |                  | I    |                 |                 |                |                  |                 |                  | 9 |
| 2 | <b>211.1441</b> | 106.0757        |                |                  |                |                  | P    | <b>922.4265</b> | 461.7169        | 905.3999       | 453.2036         | <b>904.4159</b> | 452.7116         | 8 |
| 3 | 312.1918        | 156.5995        |                |                  | 294.1812       | 147.5942         | T    | <b>825.3737</b> | 413.1905        | 808.3472       | 404.6772         | <b>807.3632</b> | <b>404.1852</b>  | 7 |
| 4 | 413.2395        | 207.1234        |                |                  | 395.2289       | 198.1181         | T    | <b>724.3260</b> | 362.6667        | 707.2995       | 354.1534         | 706.3155        | 353.6614         | 6 |
| 5 | 560.3079        | 280.6576        |                |                  | 542.2973       | 271.6523         | F    | <b>623.2784</b> | 312.1428        | 606.2518       | 303.6295         | 605.2678        | 303.1375         | 5 |
| 6 | 689.3505        | 345.1789        |                |                  | 671.3399       | 336.1736         | E    | <b>476.2100</b> | 238.6086        | 459.1834       | 230.0953         | 458.1994        | 229.6033         | 4 |
| 7 | 804.3774        | 402.6923        | 787.3509       | 394.1791         | 786.3668       | 393.6871         | N    | <b>347.1674</b> | 174.0873        | 330.1408       | 165.5740         |                 |                  | 3 |
| 8 | 861.3989        | 431.2031        | 844.3723       | 422.6898         | 843.3883       | 422.1978         | G    | <b>232.1404</b> | 116.5738        | 215.1139       | 108.0606         |                 |                  | 2 |
| 9 |                 |                 |                |                  |                |                  | R    | 175.1190        | 88.0631         | 158.0924       | 79.5498          |                 |                  | 1 |

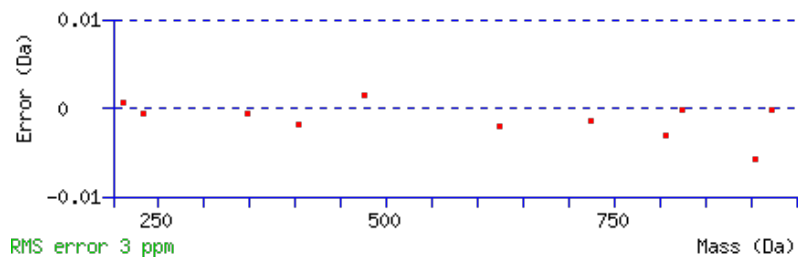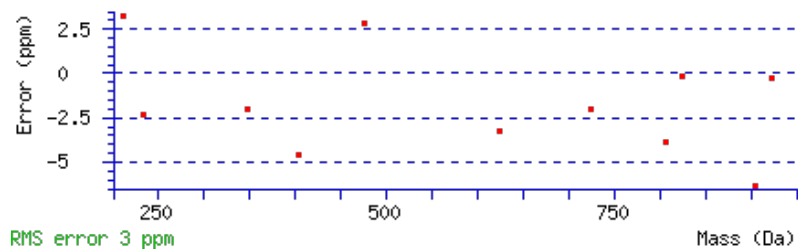

NCBI **BLAST** search of [IPTTFENGR](#)

(Parameters: blastp, nr protein database, expect=20000, no filter, PAM30)

Other BLAST [web gateways](#)

**All matches to this query**

| Score | Mr(calc)  | Delta  | Sequence                  |
|-------|-----------|--------|---------------------------|
| 36.9  | 1034.5033 | 0.0011 | <a href="#">IPTTFENGR</a> |

Mascot: <http://www.matrixscience.com/>

# Mascot Search Results

## Peptide View

MS/MS Fragmentation of **WYEIEKIPTTFENGR**

Found in **P05090** in **uni\_human\_nr**, APOD\_HUMAN Apolipoprotein D OS=Homo sapiens GN=APOD PE=1 SV=1

Match to Query 7108: 1882.911042 from(628.644290,3+) intensity(8612535.0000) rtinseconds(2502) scans(14826) index(11293)

Title: 130806\_HPL\_Human\_Plaque\_BR1\_TR2\_07\_Spectrum033264\_scans\_\_14826\_RTINSECONDS=2502

Data file E:\RAW\HumanPlaques\mgf\T\1D\T130806\_HPL\_Human\_Plaque\_BR1\_TR2\_07.mgf

Click mouse within plot area to zoom in by factor of two about that point

Or,  to  Da

Label all possible matches  Label matches used for scoring

Show Y-axis

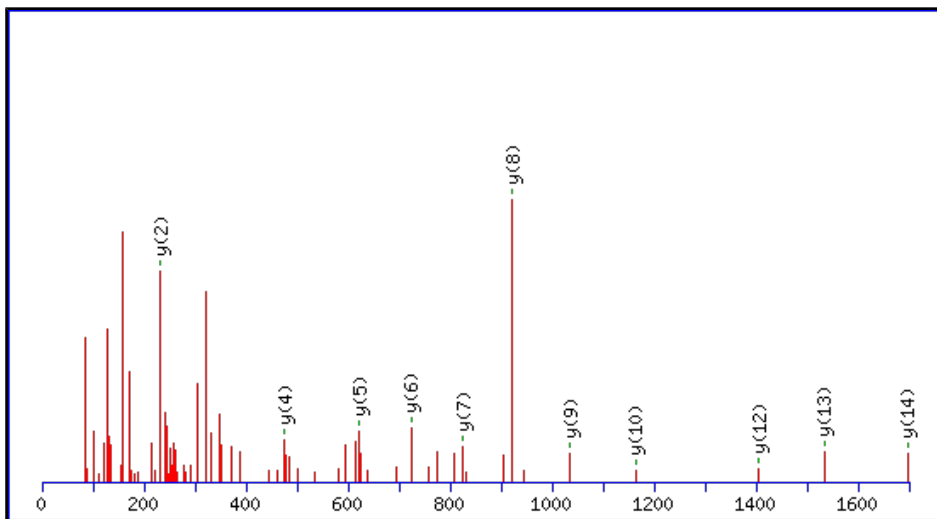

**Monoisotopic mass of neutral peptide Mr(calc):** 1882.9101

**Fixed modifications:** Carbamidomethyl (C) (apply to specified residues or termini only)

**Variable modifications:**

N13 : Deamidated (NQ)

**Ions Score:** 99 **Expect:** 8.5e-009

**Matches :** 11/148 fragment ions using 14 most intense peaks ([help](#))

| #  | b         | b <sup>++</sup> | b <sup>*</sup> | b <sup>*++</sup> | b <sup>0</sup> | b <sup>0++</sup> | Seq. | y         | y <sup>++</sup> | y <sup>*</sup> | y <sup>*++</sup> | y <sup>0</sup> | y <sup>0++</sup> | #  |
|----|-----------|-----------------|----------------|------------------|----------------|------------------|------|-----------|-----------------|----------------|------------------|----------------|------------------|----|
| 1  | 187.0866  | 94.0469         |                |                  |                |                  | W    |           |                 |                |                  |                |                  | 15 |
| 2  | 350.1499  | 175.5786        |                |                  |                |                  | Y    | 1697.8381 | 849.4227        | 1680.8115      | 840.9094         | 1679.8275      | 840.4174         | 14 |
| 3  | 479.1925  | 240.0999        |                |                  | 461.1819       | 231.0946         | E    | 1534.7748 | 767.8910        | 1517.7482      | 759.3777         | 1516.7642      | 758.8857         | 13 |
| 4  | 592.2766  | 296.6419        |                |                  | 574.2660       | 287.6366         | I    | 1405.7322 | 703.3697        | 1388.7056      | 694.8564         | 1387.7216      | 694.3644         | 12 |
| 5  | 721.3192  | 361.1632        |                |                  | 703.3086       | 352.1579         | E    | 1292.6481 | 646.8277        | 1275.6216      | 638.3144         | 1274.6375      | 637.8224         | 11 |
| 6  | 849.4141  | 425.2107        | 832.3876       | 416.6974         | 831.4036       | 416.2054         | K    | 1163.6055 | 582.3064        | 1146.5790      | 573.7931         | 1145.5950      | 573.3011         | 10 |
| 7  | 962.4982  | 481.7527        | 945.4716       | 473.2395         | 944.4876       | 472.7475         | I    | 1035.5106 | 518.2589        | 1018.4840      | 509.7456         | 1017.5000      | 509.2536         | 9  |
| 8  | 1059.5510 | 530.2791        | 1042.5244      | 521.7658         | 1041.5404      | 521.2738         | P    | 922.4265  | 461.7169        | 905.3999       | 453.2036         | 904.4159       | 452.7116         | 8  |
| 9  | 1160.5986 | 580.8030        | 1143.5721      | 572.2897         | 1142.5881      | 571.7977         | T    | 825.3737  | 413.1905        | 808.3472       | 404.6772         | 807.3632       | 404.1852         | 7  |
| 10 | 1261.6463 | 631.3268        | 1244.6198      | 622.8135         | 1243.6358      | 622.3215         | T    | 724.3260  | 362.6667        | 707.2995       | 354.1534         | 706.3155       | 353.6614         | 6  |
| 11 | 1408.7147 | 704.8610        | 1391.6882      | 696.3477         | 1390.7042      | 695.8557         | F    | 623.2784  | 312.1428        | 606.2518       | 303.6295         | 605.2678       | 303.1375         | 5  |
| 12 | 1537.7573 | 769.3823        | 1520.7308      | 760.8690         | 1519.7468      | 760.3770         | E    | 476.2100  | 238.6086        | 459.1834       | 230.0953         | 458.1994       | 229.6033         | 4  |
| 13 | 1652.7843 | 826.8958        | 1635.7577      | 818.3825         | 1634.7737      | 817.8905         | N    | 347.1674  | 174.0873        | 330.1408       | 165.5740         |                |                  | 3  |
| 14 | 1709.8057 | 855.4065        | 1692.7792      | 846.8932         | 1691.7952      | 846.4012         | G    | 232.1404  | 116.5738        | 215.1139       | 108.0606         |                |                  | 2  |
| 15 |           |                 |                |                  |                |                  | R    | 175.1190  | 88.0631         | 158.0924       | 79.5498          |                |                  | 1  |

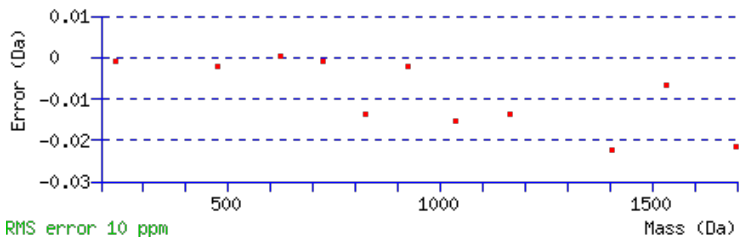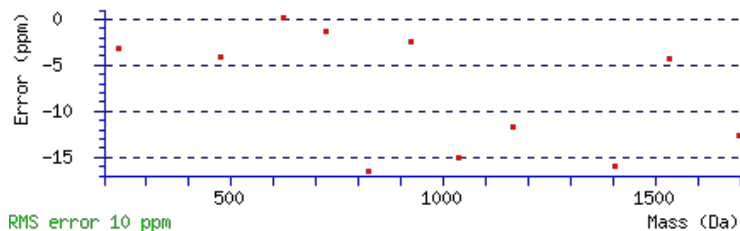

NCBI **BLAST** search of [WYEIEKIPTTFENGR](#)

(Parameters: blastp, nr protein database, expect=20000, no filter, PAM30)

Other BLAST [web gateways](#)

**All matches to this query**

| Score | Mr(calc)  | Delta  | Sequence                          |
|-------|-----------|--------|-----------------------------------|
| 99.5  | 1882.9101 | 0.0009 | <a href="#">WYEIEKIPTTFENGR</a>   |
| 9.0   | 1881.9109 | 1.0002 | <a href="#">KLLSSGFIDITPDDFGR</a> |
| 3.5   | 1881.9108 | 1.0002 | <a href="#">LEQELFSGGNTGINFEK</a> |

Mascot: <http://www.matrixscience.com/>

# Mascot Search Results

## Peptide View

MS/MS Fragmentation of **WYEIEKIPTTFENGR**

Found in **P05090** in **uni\_human\_nr**, APOD\_HUMAN Apolipoprotein D OS=Homo sapiens GN=APOD PE=1 SV=1

Match to Query 7798: 1882.908308 from(942.461430,2+) intensity(3155450.7500) rtinseconds(2465) scans(15491) index(12383)

Title: 130806\_HPL\_Human\_Plaque\_BR1\_TR2\_04\_Spectrum035797\_scans\_\_15491\_RTINSECONDS=2465

Data file E:\RAW\HumanPlaques\mgf\T\1D\T130806\_HPL\_Human\_Plaque\_BR1\_TR2\_04.mgf

Click mouse within plot area to zoom in by factor of two about that point

Or,  to  Da

Label all possible matches  Label matches used for scoring

Show Y-axis

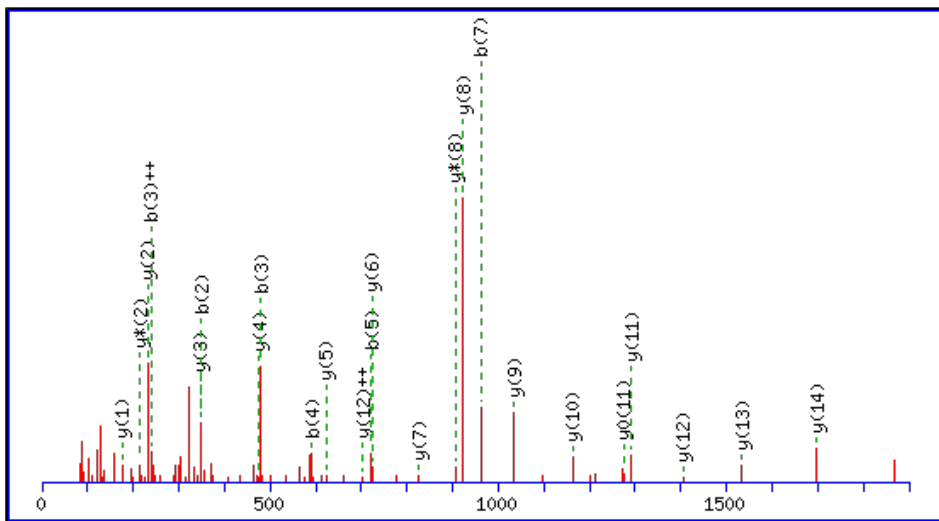

Monoisotopic mass of neutral peptide  $M_r(\text{calc})$ : 1882.9101

Fixed modifications: Carbamidomethyl (C) (apply to specified residues or termini only)

Variable modifications:

N13 : Deamidated (NQ)

Ions Score: 87 Expect: 1.5e-007

Matches : 24/148 fragment ions using 58 most intense peaks ([help](#))

| #  | b               | b <sup>++</sup> | b <sup>*</sup> | b <sup>*++</sup> | b <sup>0</sup> | b <sup>0++</sup> | Seq. | y                | y <sup>++</sup> | y <sup>*</sup>  | y <sup>*++</sup> | y <sup>0</sup>   | y <sup>0++</sup> | #  |
|----|-----------------|-----------------|----------------|------------------|----------------|------------------|------|------------------|-----------------|-----------------|------------------|------------------|------------------|----|
| 1  | 187.0866        | 94.0469         |                |                  |                |                  | W    |                  |                 |                 |                  |                  |                  | 15 |
| 2  | <b>350.1499</b> | 175.5786        |                |                  |                |                  | Y    | <b>1697.8381</b> | 849.4227        | 1680.8115       | 840.9094         | 1679.8275        | 840.4174         | 14 |
| 3  | <b>479.1925</b> | <b>240.0999</b> |                |                  | 461.1819       | 231.0946         | E    | <b>1534.7748</b> | 767.8910        | 1517.7482       | 759.3777         | 1516.7642        | 758.8857         | 13 |
| 4  | <b>592.2766</b> | 296.6419        |                |                  | 574.2660       | 287.6366         | I    | <b>1405.7322</b> | <b>703.3697</b> | 1388.7056       | 694.8564         | 1387.7216        | 694.3644         | 12 |
| 5  | <b>721.3192</b> | 361.1632        |                |                  | 703.3086       | 352.1579         | E    | <b>1292.6481</b> | 646.8277        | 1275.6216       | 638.3144         | <b>1274.6375</b> | 637.8224         | 11 |
| 6  | 849.4141        | 425.2107        | 832.3876       | 416.6974         | 831.4036       | 416.2054         | K    | <b>1163.6055</b> | 582.3064        | 1146.5790       | 573.7931         | 1145.5950        | 573.3011         | 10 |
| 7  | <b>962.4982</b> | 481.7527        | 945.4716       | 473.2395         | 944.4876       | 472.7475         | I    | <b>1035.5106</b> | 518.2589        | 1018.4840       | 509.7456         | 1017.5000        | 509.2536         | 9  |
| 8  | 1059.5510       | 530.2791        | 1042.5244      | 521.7658         | 1041.5404      | 521.2738         | P    | <b>922.4265</b>  | 461.7169        | <b>905.3999</b> | 453.2036         | 904.4159         | 452.7116         | 8  |
| 9  | 1160.5986       | 580.8030        | 1143.5721      | 572.2897         | 1142.5881      | 571.7977         | T    | <b>825.3737</b>  | 413.1905        | 808.3472        | 404.6772         | 807.3632         | 404.1852         | 7  |
| 10 | 1261.6463       | 631.3268        | 1244.6198      | 622.8135         | 1243.6358      | 622.3215         | T    | <b>724.3260</b>  | 362.6667        | 707.2995        | 354.1534         | 706.3155         | 353.6614         | 6  |
| 11 | 1408.7147       | 704.8610        | 1391.6882      | 696.3477         | 1390.7042      | 695.8557         | F    | <b>623.2784</b>  | 312.1428        | 606.2518        | 303.6295         | 605.2678         | 303.1375         | 5  |
| 12 | 1537.7573       | 769.3823        | 1520.7308      | 760.8690         | 1519.7468      | 760.3770         | E    | <b>476.2100</b>  | 238.6086        | 459.1834        | 230.0953         | 458.1994         | 229.6033         | 4  |
| 13 | 1652.7843       | 826.8958        | 1635.7577      | 818.3825         | 1634.7737      | 817.8905         | N    | <b>347.1674</b>  | 174.0873        | 330.1408        | 165.5740         |                  |                  | 3  |
| 14 | 1709.8057       | 855.4065        | 1692.7792      | 846.8932         | 1691.7952      | 846.4012         | G    | <b>232.1404</b>  | 116.5738        | <b>215.1139</b> | 108.0606         |                  |                  | 2  |
| 15 |                 |                 |                |                  |                |                  | R    | <b>175.1190</b>  | 88.0631         | 158.0924        | 79.5498          |                  |                  | 1  |



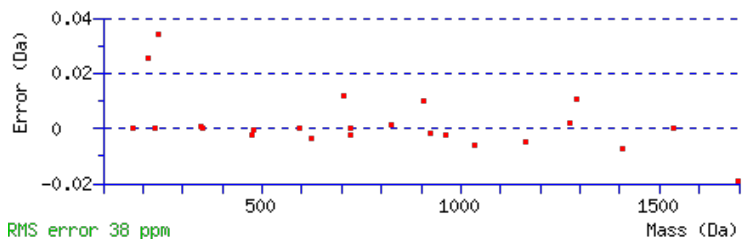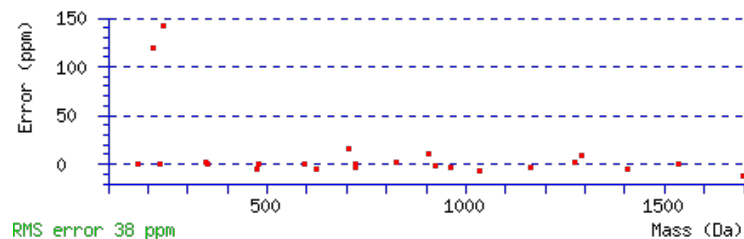

NCBI BLAST search of [WYEIEKIPTTFENGR](#)

(Parameters: blastp, nr protein database, expect=20000, no filter, PAM30)

Other BLAST [web gateways](#)

**All matches to this query**

| Score | Mr(calc)  | Delta   | Sequence                          |
|-------|-----------|---------|-----------------------------------|
| 87.1  | 1882.9101 | -0.0018 | <a href="#">WYEIEKIPTTFENGR</a>   |
| 6.4   | 1881.9109 | 0.9974  | <a href="#">KLLSSGFDIDTPDDEGR</a> |
| 0.9   | 1880.8971 | 2.0112  | <a href="#">MSARQKQIMEIEEQK</a>   |
| 0.8   | 1880.8976 | 2.0107  | <a href="#">QHLEEQLQQERQR</a>     |
| 0.5   | 1880.8971 | 2.0112  | <a href="#">MSARQKQIMEIEEQK</a>   |

Mascot: <http://www.matrixscience.com/>

# Mascot Search Results

## Peptide View

MS/MS Fragmentation of **WYEIEKIPTTFENGR**

Found in **P05090** in **uni\_human\_nr**, APOD\_HUMAN Apolipoprotein D OS=Homo sapiens GN=APOD PE=1 SV=1

Match to Query 8625: 1881.926128 from(941.970340,2+) intensity(3746826.7500) rtinseconds(2295) scans(14557) index(11382)

Title: 130801\_HPL\_Human\_Plaque\_BR2\_TR1\_02\_Spectrum035537\_scans\_\_14557\_RTINSECONDS=2295

Data file E:\RAW\HumanPlaques\mgf\T\1D\T130801\_HPL\_Human\_Plaque\_BR2\_TR1\_02.mgf

Click mouse within plot area to zoom in by factor of two about that point

Or,  to  Da

Label all possible matches  Label matches used for scoring

Show Y-axis

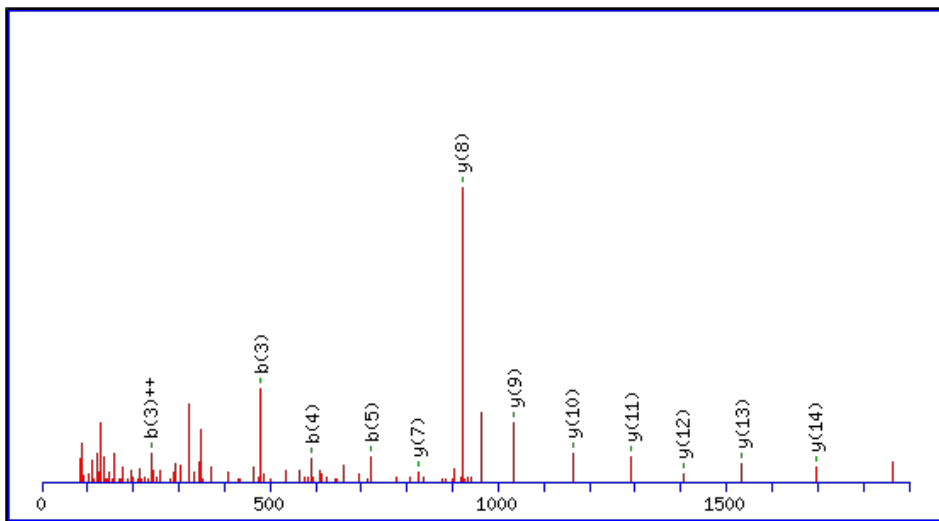

Monoisotopic mass of neutral peptide Mr(calc): 1881.9261

Fixed modifications: Carbamidomethyl (C) (apply to specified residues or termini only)

Ions Score: 65 Expect: 2.3e-005

Matches : 12/148 fragment ions using 16 most intense peaks ([help](#))

| #  | b         | b <sup>++</sup> | b*        | b <sup>*++</sup> | b <sup>0</sup> | b <sup>0++</sup> | Seq. | y         | y <sup>++</sup> | y*        | y <sup>*++</sup> | y <sup>0</sup> | y <sup>0++</sup> | #  |
|----|-----------|-----------------|-----------|------------------|----------------|------------------|------|-----------|-----------------|-----------|------------------|----------------|------------------|----|
| 1  | 187.0866  | 94.0469         |           |                  |                |                  | W    |           |                 |           |                  |                |                  | 15 |
| 2  | 350.1499  | 175.5786        |           |                  |                |                  | Y    | 1696.8541 | 848.9307        | 1679.8275 | 840.4174         | 1678.8435      | 839.9254         | 14 |
| 3  | 479.1925  | 240.0999        |           |                  | 461.1819       | 231.0946         | E    | 1533.7907 | 767.3990        | 1516.7642 | 758.8857         | 1515.7802      | 758.3937         | 13 |
| 4  | 592.2766  | 296.6419        |           |                  | 574.2660       | 287.6366         | I    | 1404.7482 | 702.8777        | 1387.7216 | 694.3644         | 1386.7376      | 693.8724         | 12 |
| 5  | 721.3192  | 361.1632        |           |                  | 703.3086       | 352.1579         | E    | 1291.6641 | 646.3357        | 1274.6375 | 637.8224         | 1273.6535      | 637.3304         | 11 |
| 6  | 849.4141  | 425.2107        | 832.3876  | 416.6974         | 831.4036       | 416.2054         | K    | 1162.6215 | 581.8144        | 1145.5950 | 573.3011         | 1144.6109      | 572.8091         | 10 |
| 7  | 962.4982  | 481.7527        | 945.4716  | 473.2395         | 944.4876       | 472.7475         | I    | 1034.5265 | 517.7669        | 1017.5000 | 509.2536         | 1016.5160      | 508.7616         | 9  |
| 8  | 1059.5510 | 530.2791        | 1042.5244 | 521.7658         | 1041.5404      | 521.2738         | P    | 921.4425  | 461.2249        | 904.4159  | 452.7116         | 903.4319       | 452.2196         | 8  |
| 9  | 1160.5986 | 580.8030        | 1143.5721 | 572.2897         | 1142.5881      | 571.7977         | T    | 824.3897  | 412.6985        | 807.3632  | 404.1852         | 806.3791       | 403.6932         | 7  |
| 10 | 1261.6463 | 631.3268        | 1244.6198 | 622.8135         | 1243.6358      | 622.3215         | T    | 723.3420  | 362.1747        | 706.3155  | 353.6614         | 705.3315       | 353.1694         | 6  |
| 11 | 1408.7147 | 704.8610        | 1391.6882 | 696.3477         | 1390.7042      | 695.8557         | F    | 622.2944  | 311.6508        | 605.2678  | 303.1375         | 604.2838       | 302.6455         | 5  |
| 12 | 1537.7573 | 769.3823        | 1520.7308 | 760.8690         | 1519.7468      | 760.3770         | E    | 475.2259  | 238.1166        | 458.1994  | 229.6033         | 457.2154       | 229.1113         | 4  |
| 13 | 1651.8003 | 826.4038        | 1634.7737 | 817.8905         | 1633.7897      | 817.3985         | N    | 346.1833  | 173.5953        | 329.1568  | 165.0820         |                |                  | 3  |
| 14 | 1708.8217 | 854.9145        | 1691.7952 | 846.4012         | 1690.8112      | 845.9092         | G    | 232.1404  | 116.5738        | 215.1139  | 108.0606         |                |                  | 2  |
| 15 |           |                 |           |                  |                |                  | R    | 175.1190  | 88.0631         | 158.0924  | 79.5498          |                |                  | 1  |

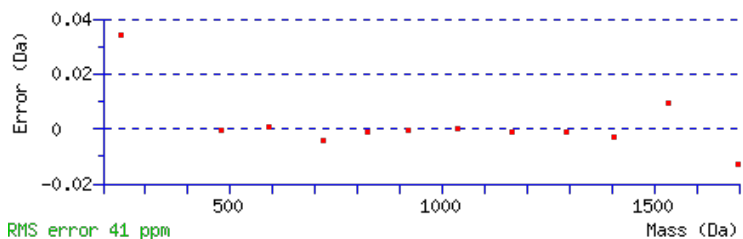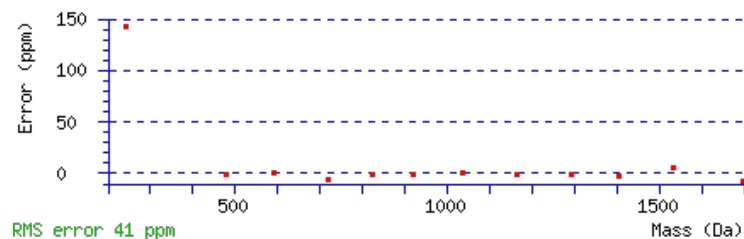

NCBI BLAST search of [WYEIEKIPTTFENGR](#)

(Parameters: blastp, nr protein database, expect=20000, no filter, PAM30)

Other BLAST [web gateways](#)

**All matches to this query**

| Score | Mr(calc)  | Delta  | Sequence                         |
|-------|-----------|--------|----------------------------------|
| 65.5  | 1881.9261 | 0.0000 | <a href="#">WYEIEKIPTTFENGR</a>  |
| 1.7   | 1879.9136 | 2.0125 | <a href="#">QHLEEQR LQQERQR</a>  |
| 1.0   | 1880.9156 | 1.0106 | <a href="#">NGLVNASYTKLQWEK</a>  |
| 1.0   | 1880.9156 | 1.0106 | <a href="#">NGLVNASYTKLQWEK</a>  |
| 0.2   | 1879.9172 | 2.0090 | <a href="#">MAEQVLPQALYLSNMR</a> |

Mascot: <http://www.matrixscience.com/>

# Mascot Search Results

## Peptide View

MS/MS Fragmentation of **WYEIEKIPTTFENGR**

Found in **P05090** in **uni\_human\_nr**, APOD\_HUMAN Apolipoprotein D OS=Homo sapiens GN=APOD PE=1 SV=1

Match to Query 8626: 1881.928302 from(628.316710,3+) intensity(57068824.0000) rtinseconds(2298) scans(14583) index(11406)

Title: 130801\_HPL\_Human\_Plaque\_BR2\_TR1\_02\_Spectrum035561\_scans\_\_14583\_RTINSECONDS=2298

Data file E:\RAW\HumanPlaques\mgf\T\1D\T130801\_HPL\_Human\_Plaque\_BR2\_TR1\_02.mgf

Click mouse within plot area to zoom in by factor of two about that point

Or,  to  Da

Label all possible matches  Label matches used for scoring

Show Y-axis

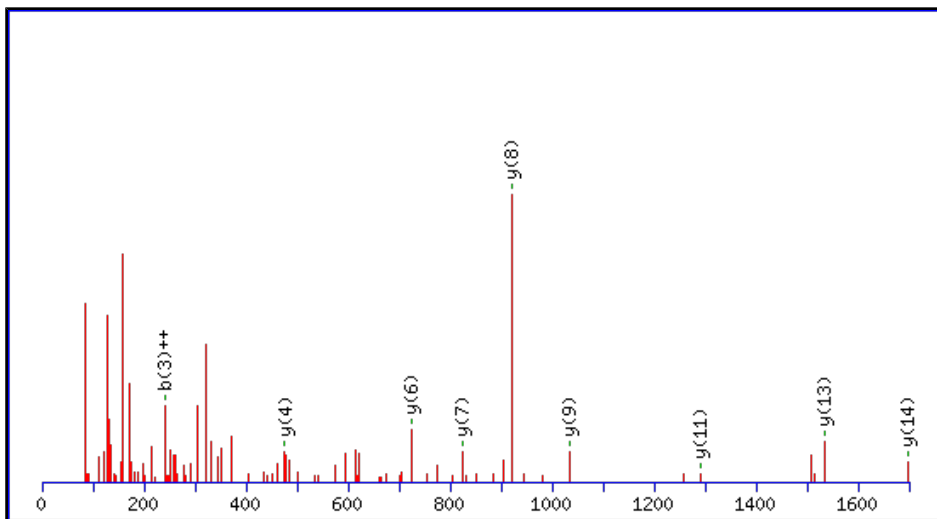

**Monoisotopic mass of neutral peptide Mr(calc):** 1881.9261

**Fixed modifications:** Carbamidomethyl (C) (apply to specified residues or termini only)

**Ions Score:** 54 **Expect:** 0.00031

**Matches:** 9/148 fragment ions using 14 most intense peaks ([help](#))

| #  | b         | b <sup>++</sup> | b <sup>*</sup> | b <sup>*++</sup> | b <sup>0</sup> | b <sup>0++</sup> | Seq. | y         | y <sup>++</sup> | y <sup>*</sup> | y <sup>*++</sup> | y <sup>0</sup> | y <sup>0++</sup> | #  |
|----|-----------|-----------------|----------------|------------------|----------------|------------------|------|-----------|-----------------|----------------|------------------|----------------|------------------|----|
| 1  | 187.0866  | 94.0469         |                |                  |                |                  | W    |           |                 |                |                  |                |                  | 15 |
| 2  | 350.1499  | 175.5786        |                |                  |                |                  | Y    | 1696.8541 | 848.9307        | 1679.8275      | 840.4174         | 1678.8435      | 839.9254         | 14 |
| 3  | 479.1925  | 240.0999        |                |                  | 461.1819       | 231.0946         | E    | 1533.7907 | 767.3990        | 1516.7642      | 758.8857         | 1515.7802      | 758.3937         | 13 |
| 4  | 592.2766  | 296.6419        |                |                  | 574.2660       | 287.6366         | I    | 1404.7482 | 702.8777        | 1387.7216      | 694.3644         | 1386.7376      | 693.8724         | 12 |
| 5  | 721.3192  | 361.1632        |                |                  | 703.3086       | 352.1579         | E    | 1291.6641 | 646.3357        | 1274.6375      | 637.8224         | 1273.6535      | 637.3304         | 11 |
| 6  | 849.4141  | 425.2107        | 832.3876       | 416.6974         | 831.4036       | 416.2054         | K    | 1162.6215 | 581.8144        | 1145.5950      | 573.3011         | 1144.6109      | 572.8091         | 10 |
| 7  | 962.4982  | 481.7527        | 945.4716       | 473.2395         | 944.4876       | 472.7475         | I    | 1034.5265 | 517.7669        | 1017.5000      | 509.2536         | 1016.5160      | 508.7616         | 9  |
| 8  | 1059.5510 | 530.2791        | 1042.5244      | 521.7658         | 1041.5404      | 521.2738         | P    | 921.4425  | 461.2249        | 904.4159       | 452.7116         | 903.4319       | 452.2196         | 8  |
| 9  | 1160.5986 | 580.8030        | 1143.5721      | 572.2897         | 1142.5881      | 571.7977         | T    | 824.3897  | 412.6985        | 807.3632       | 404.1852         | 806.3791       | 403.6932         | 7  |
| 10 | 1261.6463 | 631.3268        | 1244.6198      | 622.8135         | 1243.6358      | 622.3215         | T    | 723.3420  | 362.1747        | 706.3155       | 353.6614         | 705.3315       | 353.1694         | 6  |
| 11 | 1408.7147 | 704.8610        | 1391.6882      | 696.3477         | 1390.7042      | 695.8557         | F    | 622.2944  | 311.6508        | 605.2678       | 303.1375         | 604.2838       | 302.6455         | 5  |
| 12 | 1537.7573 | 769.3823        | 1520.7308      | 760.8690         | 1519.7468      | 760.3770         | E    | 475.2259  | 238.1166        | 458.1994       | 229.6033         | 457.2154       | 229.1113         | 4  |
| 13 | 1651.8003 | 826.4038        | 1634.7737      | 817.8905         | 1633.7897      | 817.3985         | N    | 346.1833  | 173.5953        | 329.1568       | 165.0820         |                |                  | 3  |
| 14 | 1708.8217 | 854.9145        | 1691.7952      | 846.4012         | 1690.8112      | 845.9092         | G    | 232.1404  | 116.5738        | 215.1139       | 108.0606         |                |                  | 2  |
| 15 |           |                 |                |                  |                |                  | R    | 175.1190  | 88.0631         | 158.0924       | 79.5498          |                |                  | 1  |

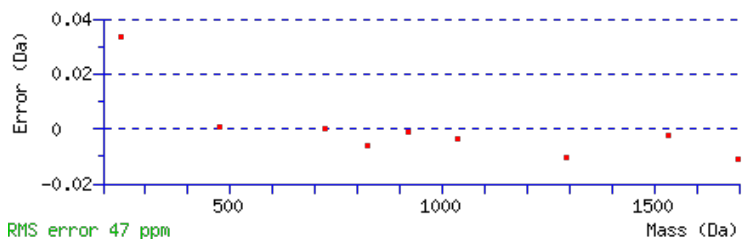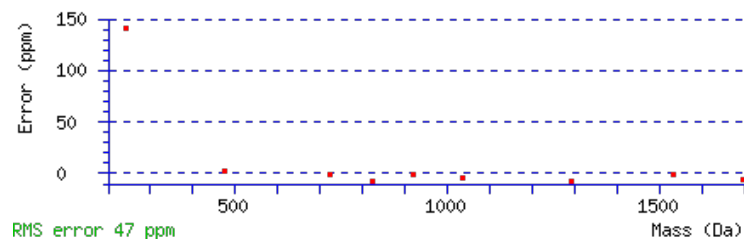

NCBI BLAST search of [WYEIEKIPTTFENGR](#)

(Parameters: blastp, nr protein database, expect=20000, no filter, PAM30)

Other BLAST [web gateways](#)

**All matches to this query**

| Score | Mr(calc)  | Delta  | Sequence                        |
|-------|-----------|--------|---------------------------------|
| 54.5  | 1881.9261 | 0.0022 | <a href="#">WYEIEKIPTTFENGR</a> |

Mascot: <http://www.matrixscience.com/>

# Mascot Search Results

## Peptide View

MS/MS Fragmentation of **MNINGQWEGEVNGR**

Found in **P46109** in **uni\_human\_nr**, CRKL\_HUMAN Crk-like protein OS=Homo sapiens GN=CRKL PE=1 SV=1

Match to Query 4416: 1603.705168 from(802.859860,2+) intensity(138766.9531) rtinseconds(2017) scans(11262) index(8427)

Title: 130809\_HPL\_Human\_Plaque\_BR1\_TR3\_10\_Spectrum029963\_scans\_\_11262\_RTINSECONDS=2017

Data file E:\RAW\HumanPlaques\mgf\T\1D\T130809\_HPL\_Human\_Plaque\_BR1\_TR3\_10.mgf

Click mouse within plot area to zoom in by factor of two about that point

Or,  to  Da

Label all possible matches  Label matches used for scoring

Show Y-axis

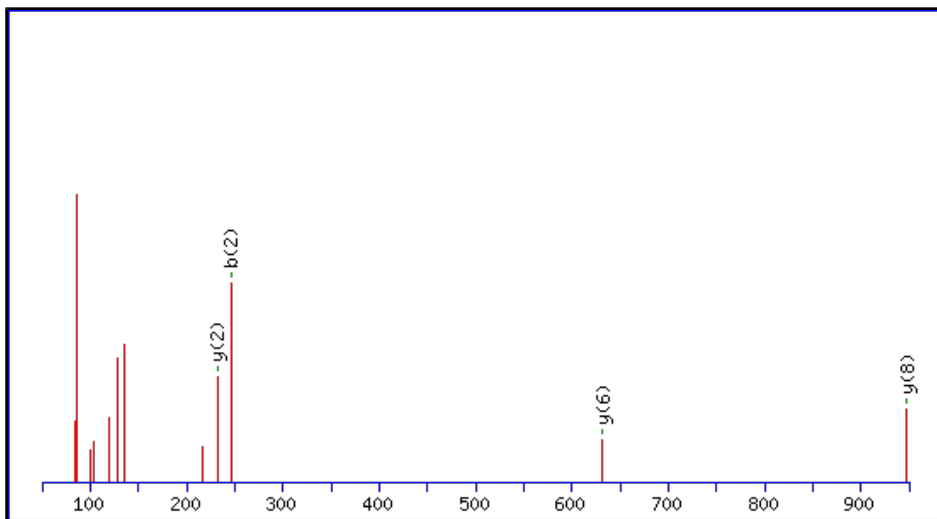

**Monoisotopic mass of neutral peptide Mr(calc):** 1603.7049

**Fixed modifications:** Carbamidomethyl (C) (apply to specified residues or termini only)

**Variable modifications:**

N12 : Deamidated (NQ)

**Ions Score:** 15 **Expect:** 0.78

**Matches :** 4/132 fragment ions using 6 most intense peaks ([help](#))

| #  | b               | b <sup>++</sup> | b <sup>*</sup> | b <sup>*++</sup> | b <sup>0</sup> | b <sup>0++</sup> | Seq. | y               | y <sup>++</sup> | y <sup>*</sup> | y <sup>*++</sup> | y <sup>0</sup> | y <sup>0++</sup> | #  |
|----|-----------------|-----------------|----------------|------------------|----------------|------------------|------|-----------------|-----------------|----------------|------------------|----------------|------------------|----|
| 1  | 132.0478        | 66.5275         |                |                  |                |                  | M    |                 |                 |                |                  |                |                  | 14 |
| 2  | <b>246.0907</b> | 123.5490        | 229.0641       | 115.0357         |                |                  | N    | 1473.6717       | 737.3395        | 1456.6451      | 728.8262         | 1455.6611      | 728.3342         | 13 |
| 3  | 359.1748        | 180.0910        | 342.1482       | 171.5777         |                |                  | I    | 1359.6288       | 680.3180        | 1342.6022      | 671.8047         | 1341.6182      | 671.3127         | 12 |
| 4  | 473.2177        | 237.1125        | 456.1911       | 228.5992         |                |                  | N    | 1246.5447       | 623.7760        | 1229.5182      | 615.2627         | 1228.5341      | 614.7707         | 11 |
| 5  | 530.2391        | 265.6232        | 513.2126       | 257.1099         |                |                  | G    | 1132.5018       | 566.7545        | 1115.4752      | 558.2413         | 1114.4912      | 557.7492         | 10 |
| 6  | 658.2977        | 329.6525        | 641.2712       | 321.1392         |                |                  | Q    | 1075.4803       | 538.2438        | 1058.4538      | 529.7305         | 1057.4697      | 529.2385         | 9  |
| 7  | 844.3770        | 422.6922        | 827.3505       | 414.1789         |                |                  | W    | <b>947.4217</b> | 474.2145        | 930.3952       | 465.7012         | 929.4112       | 465.2092         | 8  |
| 8  | 973.4196        | 487.2135        | 956.3931       | 478.7002         | 955.4091       | 478.2082         | E    | 761.3424        | 381.1748        | 744.3159       | 372.6616         | 743.3319       | 372.1696         | 7  |
| 9  | 1030.4411       | 515.7242        | 1013.4145      | 507.2109         | 1012.4305      | 506.7189         | G    | <b>632.2998</b> | 316.6536        | 615.2733       | 308.1403         | 614.2893       | 307.6483         | 6  |
| 10 | 1159.4837       | 580.2455        | 1142.4571      | 571.7322         | 1141.4731      | 571.2402         | E    | 575.2784        | 288.1428        | 558.2518       | 279.6295         | 557.2678       | 279.1375         | 5  |
| 11 | 1258.5521       | 629.7797        | 1241.5255      | 621.2664         | 1240.5415      | 620.7744         | V    | 446.2358        | 223.6215        | 429.2092       | 215.1083         |                |                  | 4  |
| 12 | 1373.5790       | 687.2932        | 1356.5525      | 678.7799         | 1355.5685      | 678.2879         | N    | 347.1674        | 174.0873        | 330.1408       | 165.5740         |                |                  | 3  |
| 13 | 1430.6005       | 715.8039        | 1413.5740      | 707.2906         | 1412.5899      | 706.7986         | G    | <b>232.1404</b> | 116.5738        | 215.1139       | 108.0606         |                |                  | 2  |
| 14 |                 |                 |                |                  |                |                  | R    | 175.1190        | 88.0631         | 158.0924       | 79.5498          |                |                  | 1  |

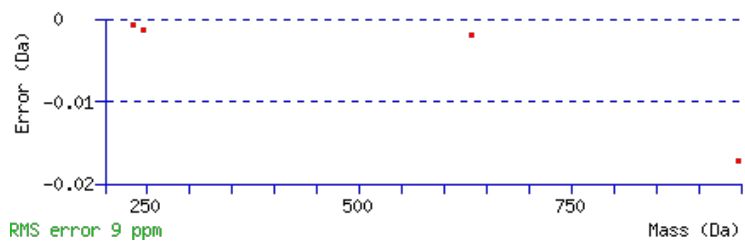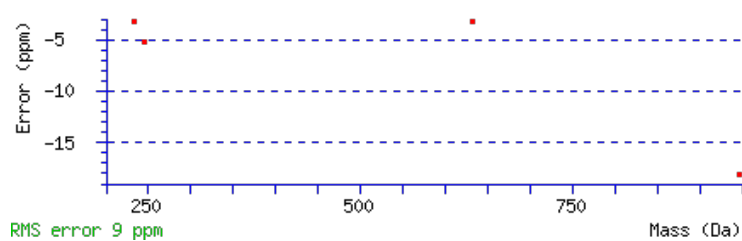

NCBI BLAST search of [MNINGQWEGEVNGR](#)

(Parameters: blastp, nr protein database, expect=20000, no filter, PAM30)

Other BLAST [web gateways](#)

**All matches to this query**

| Score | Mr(calc)  | Delta  | Sequence                       |
|-------|-----------|--------|--------------------------------|
| 15.4  | 1603.7049 | 0.0003 | <a href="#">MNINGQWEGEVNGR</a> |

Mascot: <http://www.matrixscience.com/>

# Mascot Search Results

## Peptide View

MS/MS Fragmentation of **AADFIDQALAQKNGR**

Found in **P51452** in **uni\_human\_nr**, DUS3\_HUMAN Dual specificity protein phosphatase 3 OS=Homo sapiens GN=DUSP3 PE=1 SV=1

Match to Query 4308: 1617.812022 from(540.277950,3+) intensity(667883.1875) rtinseconds(2021) scans(11311) index(8395)

Title: 130809\_HPL\_Human\_Plaque\_BR2\_TR3\_08\_Spectrum029893\_scans\_\_11311\_RTINSECONDS=2021

Data file E:\RAW\HumanPlaques\mgf\T\1D\T130809\_HPL\_Human\_Plaque\_BR2\_TR3\_08.mgf

Click mouse within plot area to zoom in by factor of two about that point

Or,  to  Da

Label all possible matches  Label matches used for scoring

Show Y-axis

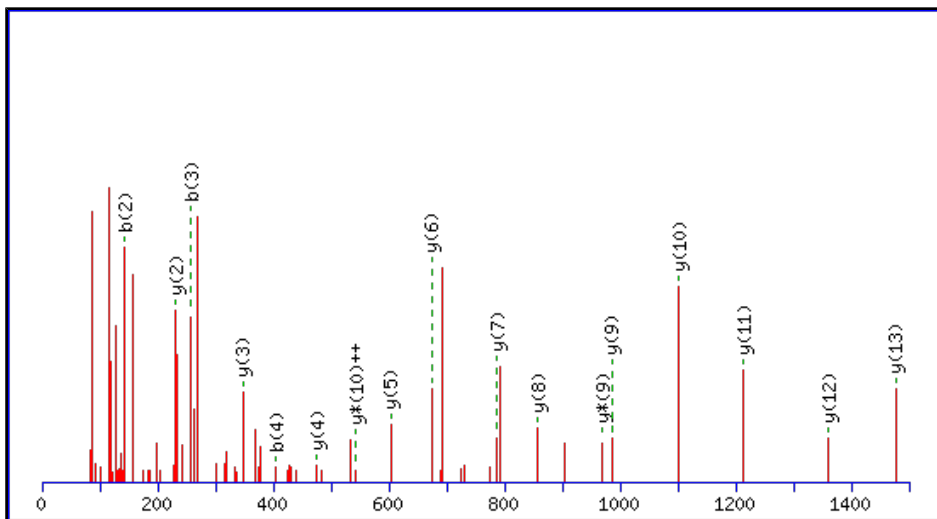

**Monoisotopic mass of neutral peptide Mr(calc):** 1617.8111

**Fixed modifications:** Carbamidomethyl (C) (apply to specified residues or termini only)

**Variable modifications:**

N13 : Deamidated (NQ)

**Ions Score:** 91 **Expect:** 7e-008

**Matches :** 17/134 fragment ions using 32 most intense peaks ([help](#))

| #  | b               | b <sup>++</sup> | b <sup>*</sup> | b <sup>*++</sup> | b <sup>0</sup> | b <sup>0++</sup> | Seq. | y                | y <sup>++</sup> | y <sup>*</sup>  | y <sup>*++</sup> | y <sup>0</sup> | y <sup>0++</sup> | #  |
|----|-----------------|-----------------|----------------|------------------|----------------|------------------|------|------------------|-----------------|-----------------|------------------|----------------|------------------|----|
| 1  | 72.0444         | 36.5258         |                |                  |                |                  | A    |                  |                 |                 |                  |                |                  | 15 |
| 2  | <b>143.0815</b> | 72.0444         |                |                  |                |                  | A    | 1547.7812        | 774.3943        | 1530.7547       | 765.8810         | 1529.7707      | 765.3890         | 14 |
| 3  | <b>258.1084</b> | 129.5579        |                |                  | 240.0979       | 120.5526         | D    | <b>1476.7441</b> | 738.8757        | 1459.7176       | 730.3624         | 1458.7336      | 729.8704         | 13 |
| 4  | <b>405.1769</b> | 203.0921        |                |                  | 387.1663       | 194.0868         | F    | <b>1361.7172</b> | 681.3622        | 1344.6906       | 672.8490         | 1343.7066      | 672.3570         | 12 |
| 5  | 518.2609        | 259.6341        |                |                  | 500.2504       | 250.6288         | I    | <b>1214.6488</b> | 607.8280        | 1197.6222       | 599.3148         | 1196.6382      | 598.8227         | 11 |
| 6  | 633.2879        | 317.1476        |                |                  | 615.2773       | 308.1423         | D    | <b>1101.5647</b> | 551.2860        | 1084.5382       | <b>542.7727</b>  | 1083.5541      | 542.2807         | 10 |
| 7  | 761.3464        | 381.1769        | 744.3199       | 372.6636         | 743.3359       | 372.1716         | Q    | <b>986.5378</b>  | 493.7725        | <b>969.5112</b> | 485.2592         |                |                  | 9  |
| 8  | 832.3836        | 416.6954        | 815.3570       | 408.1821         | 814.3730       | 407.6901         | A    | <b>858.4792</b>  | 429.7432        | 841.4526        | 421.2300         |                |                  | 8  |
| 9  | 945.4676        | 473.2375        | 928.4411       | 464.7242         | 927.4571       | 464.2322         | L    | <b>787.4421</b>  | 394.2247        | 770.4155        | 385.7114         |                |                  | 7  |
| 10 | 1016.5047       | 508.7560        | 999.4782       | 500.2427         | 998.4942       | 499.7507         | A    | <b>674.3580</b>  | 337.6826        | 657.3315        | 329.1694         |                |                  | 6  |
| 11 | 1144.5633       | 572.7853        | 1127.5368      | 564.2720         | 1126.5528      | 563.7800         | Q    | <b>603.3209</b>  | 302.1641        | 586.2944        | 293.6508         |                |                  | 5  |
| 12 | 1272.6583       | 636.8328        | 1255.6317      | 628.3195         | 1254.6477      | 627.8275         | K    | <b>475.2623</b>  | 238.1348        | 458.2358        | 229.6215         |                |                  | 4  |
| 13 | 1387.6852       | 694.3462        | 1370.6587      | 685.8330         | 1369.6747      | 685.3410         | N    | <b>347.1674</b>  | 174.0873        | 330.1408        | 165.5740         |                |                  | 3  |
| 14 | 1444.7067       | 722.8570        | 1427.6801      | 714.3437         | 1426.6961      | 713.8517         | G    | <b>232.1404</b>  | 116.5738        | 215.1139        | 108.0606         |                |                  | 2  |
| 15 |                 |                 |                |                  |                |                  | R    | 175.1190         | 88.0631         | 158.0924        | 79.5498          |                |                  | 1  |



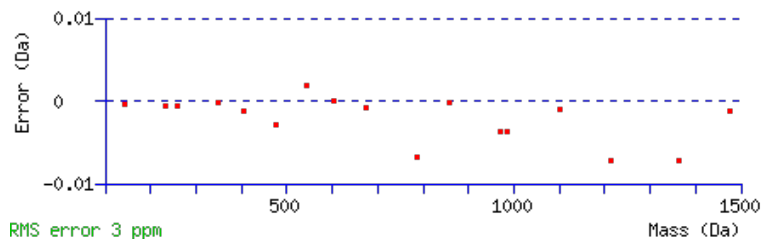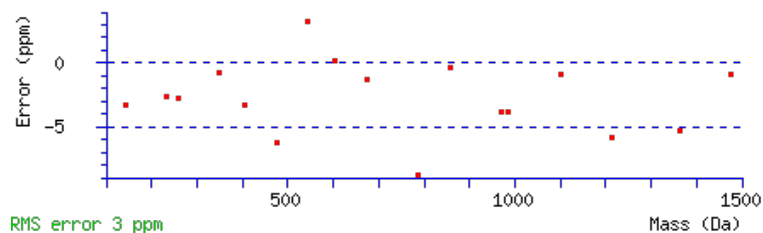

NCBI **BLAST** search of [AADFIDQALAQKNGR](#)

(Parameters: blastp, nr protein database, expect=20000, no filter, PAM30)

Other BLAST [web gateways](#)

**All matches to this query**

| Score | Mr(calc)  | Delta  | Sequence                        | Site Analysis         |
|-------|-----------|--------|---------------------------------|-----------------------|
| 90.8  | 1617.8111 | 0.0010 | <a href="#">AADFIDQALAQKNGR</a> | Deamidated N13 99.86% |
| 62.3  | 1617.8111 | 0.0010 | <a href="#">AADFIDQALAQKNGR</a> | Deamidated Q11 0.14%  |
| 20.2  | 1617.8111 | 0.0010 | <a href="#">AADFIDQALAQKNGR</a> | Deamidated Q7 0.00%   |

Mascot: <http://www.matrixscience.com/>

# Mascot Search Results

## Peptide View

MS/MS Fragmentation of **AADFIDQALAQKNGR**

Found in **P51452** in **uni\_human\_nr**, DUS3\_HUMAN Dual specificity protein phosphatase 3 OS=Homo sapiens GN=DUSP3 PE=1 SV=1

Match to Query 5819: 1616.827302 from(539.949710,3+) intensity(1461600.6250) rtinseconds(1776) scans(10305) index(7673)

Title: 130801\_HPL\_Human\_Plaque\_BR1\_TR1\_02\_Spectrum031680\_scans\_\_10305\_RTINSECONDS=1776

Data file E:\RAW\HumanPlaques\mgf\T\1D\T130801\_HPL\_Human\_Plaque\_BR1\_TR1\_02.mgf

Click mouse within plot area to zoom in by factor of two about that point

Or,  to  Da

Label all possible matches  Label matches used for scoring

Show Y-axis

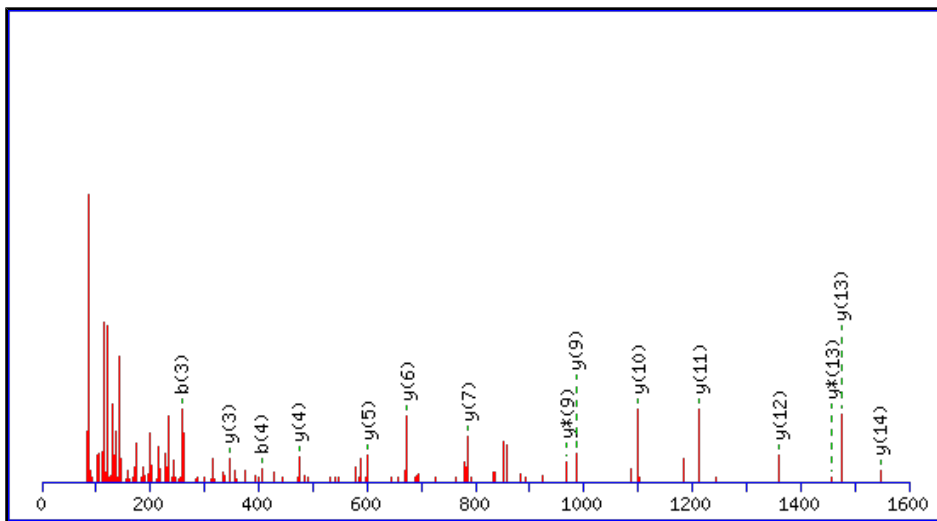

**Monoisotopic mass of neutral peptide Mr(calc):** 1616.8270

**Fixed modifications:** Carbamidomethyl (C) (apply to specified residues or termini only)

**Ions Score:** 82 **Expect:** 5.4e-007

**Matches :** 15/134 fragment ions using 28 most intense peaks ([help](#))

| #  | b         | b <sup>++</sup> | b <sup>*</sup> | b <sup>*++</sup> | b <sup>0</sup> | b <sup>0++</sup> | Seq. | y         | y <sup>++</sup> | y <sup>*</sup> | y <sup>*++</sup> | y <sup>0</sup> | y <sup>0++</sup> | #  |
|----|-----------|-----------------|----------------|------------------|----------------|------------------|------|-----------|-----------------|----------------|------------------|----------------|------------------|----|
| 1  | 72.0444   | 36.5258         |                |                  |                |                  | A    |           |                 |                |                  |                |                  | 15 |
| 2  | 143.0815  | 72.0444         |                |                  |                |                  | A    | 1546.7972 | 773.9023        | 1529.7707      | 765.3890         | 1528.7867      | 764.8970         | 14 |
| 3  | 258.1084  | 129.5579        |                |                  | 240.0979       | 120.5526         | D    | 1475.7601 | 738.3837        | 1458.7336      | 729.8704         | 1457.7496      | 729.3784         | 13 |
| 4  | 405.1769  | 203.0921        |                |                  | 387.1663       | 194.0868         | F    | 1360.7332 | 680.8702        | 1343.7066      | 672.3570         | 1342.7226      | 671.8649         | 12 |
| 5  | 518.2609  | 259.6341        |                |                  | 500.2504       | 250.6288         | I    | 1213.6648 | 607.3360        | 1196.6382      | 598.8227         | 1195.6542      | 598.3307         | 11 |
| 6  | 633.2879  | 317.1476        |                |                  | 615.2773       | 308.1423         | D    | 1100.5807 | 550.7940        | 1083.5541      | 542.2807         | 1082.5701      | 541.7887         | 10 |
| 7  | 761.3464  | 381.1769        | 744.3199       | 372.6636         | 743.3359       | 372.1716         | Q    | 985.5538  | 493.2805        | 968.5272       | 484.7672         |                |                  | 9  |
| 8  | 832.3836  | 416.6954        | 815.3570       | 408.1821         | 814.3730       | 407.6901         | A    | 857.4952  | 429.2512        | 840.4686       | 420.7380         |                |                  | 8  |
| 9  | 945.4676  | 473.2375        | 928.4411       | 464.7242         | 927.4571       | 464.2322         | L    | 786.4581  | 393.7327        | 769.4315       | 385.2194         |                |                  | 7  |
| 10 | 1016.5047 | 508.7560        | 999.4782       | 500.2427         | 998.4942       | 499.7507         | A    | 673.3740  | 337.1906        | 656.3474       | 328.6774         |                |                  | 6  |
| 11 | 1144.5633 | 572.7853        | 1127.5368      | 564.2720         | 1126.5528      | 563.7800         | Q    | 602.3369  | 301.6721        | 585.3103       | 293.1588         |                |                  | 5  |
| 12 | 1272.6583 | 636.8328        | 1255.6317      | 628.3195         | 1254.6477      | 627.8275         | K    | 474.2783  | 237.6428        | 457.2518       | 229.1295         |                |                  | 4  |
| 13 | 1386.7012 | 693.8542        | 1369.6747      | 685.3410         | 1368.6906      | 684.8490         | N    | 346.1833  | 173.5953        | 329.1568       | 165.0820         |                |                  | 3  |
| 14 | 1443.7227 | 722.3650        | 1426.6961      | 713.8517         | 1425.7121      | 713.3597         | G    | 232.1404  | 116.5738        | 215.1139       | 108.0606         |                |                  | 2  |
| 15 |           |                 |                |                  |                |                  | R    | 175.1190  | 88.0631         | 158.0924       | 79.5498          |                |                  | 1  |

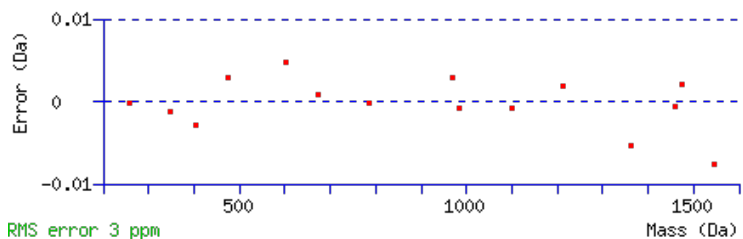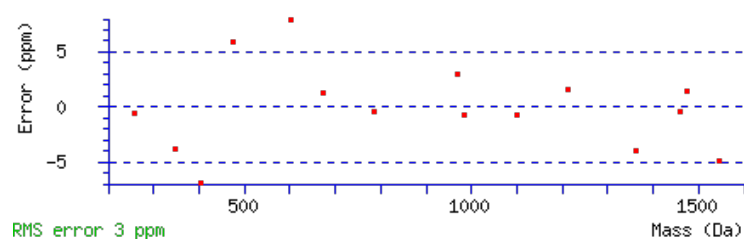

NCBI BLAST search of [AADFIDQALAQKNGR](#)

(Parameters: blastp, nr protein database, expect=20000, no filter, PAM30)

Other BLAST [web gateways](#)

**All matches to this query**

| Score | Mr(calc)  | Delta  | Sequence                        |
|-------|-----------|--------|---------------------------------|
| 82.4  | 1616.8270 | 0.0003 | <a href="#">AADFIDQALAQKNGR</a> |

Mascot: <http://www.matrixscience.com/>

# Mascot Search Results

## Peptide View

MS/MS Fragmentation of **AVETAFNGR**

Found in **Q9Y6C2** in **uni\_human\_nr**, EMIL1\_HUMAN EMILIN-1 OS=Homo sapiens GN=EMILIN1 PE=1 SV=2

Match to Query 301: 964.461768 from(483.238160,2+) intensity(177464.6875) rtinseconds(1218) scans(5255) index(3175)

Title: 130801\_HPL\_Human\_Plaque\_BR2\_TR1\_09\_Spectrum023987\_scans\_\_5255\_RTINSECONDS=1218

Data file E:\\RAW\\HumanPlaques\\mgf\\T\\1D\\T130801\_HPL\_Human\_Plaque\_BR2\_TR1\_09.mgf

Click mouse within plot area to zoom in by factor of two about that point

Or,  to  Da

Label all possible matches  Label matches used for scoring

Show Y-axis

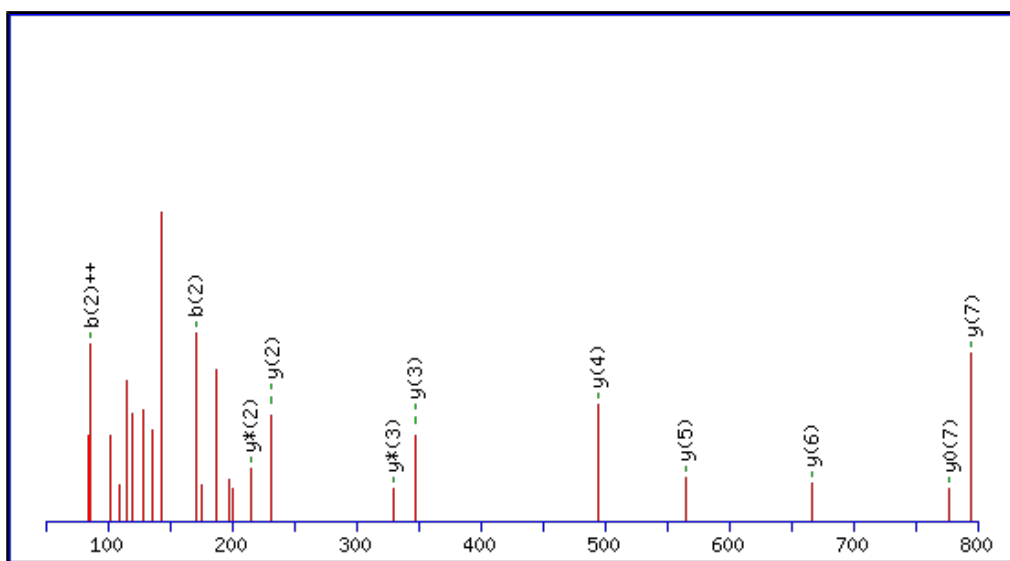

Monoisotopic mass of neutral peptide Mr(calc): 964.4614

Fixed modifications: Carbamidomethyl (C) (apply to specified residues or termini only)

Variable modifications:

N7 : Deamidated (NQ)

Ions Score: 56 Expect: 0.00013

Matches : 11/70 fragment ions using 13 most intense peaks ([help](#))

| # | b               | b <sup>++</sup> | b <sup>*</sup> | b <sup>*++</sup> | b <sup>0</sup> | b <sup>0++</sup> | Seq. | y               | y <sup>++</sup> | y <sup>*</sup>  | y <sup>*++</sup> | y <sup>0</sup>  | y <sup>0++</sup> | # |
|---|-----------------|-----------------|----------------|------------------|----------------|------------------|------|-----------------|-----------------|-----------------|------------------|-----------------|------------------|---|
| 1 | 72.0444         | 36.5258         |                |                  |                |                  | A    |                 |                 |                 |                  |                 |                  | 9 |
| 2 | <b>171.1128</b> | <b>86.0600</b>  |                |                  |                |                  | V    | 894.4316        | 447.7194        | 877.4050        | 439.2062         | 876.4210        | 438.7141         | 8 |
| 3 | 300.1554        | 150.5813        |                |                  | 282.1448       | 141.5761         | E    | <b>795.3632</b> | 398.1852        | 778.3366        | 389.6719         | <b>777.3526</b> | 389.1799         | 7 |
| 4 | 401.2031        | 201.1052        |                |                  | 383.1925       | 192.0999         | T    | <b>666.3206</b> | 333.6639        | 649.2940        | 325.1506         | 648.3100        | 324.6586         | 6 |
| 5 | 472.2402        | 236.6237        |                |                  | 454.2296       | 227.6185         | A    | <b>565.2729</b> | 283.1401        | 548.2463        | 274.6268         |                 |                  | 5 |
| 6 | 619.3086        | 310.1579        |                |                  | 601.2980       | 301.1527         | F    | <b>494.2358</b> | 247.6215        | 477.2092        | 239.1082         |                 |                  | 4 |
| 7 | 734.3355        | 367.6714        | 717.3090       | 359.1581         | 716.3250       | 358.6661         | N    | <b>347.1674</b> | 174.0873        | <b>330.1408</b> | 165.5740         |                 |                  | 3 |
| 8 | 791.3570        | 396.1821        | 774.3305       | 387.6689         | 773.3464       | 387.1769         | G    | <b>232.1404</b> | 116.5738        | <b>215.1139</b> | 108.0606         |                 |                  | 2 |
| 9 |                 |                 |                |                  |                |                  | R    | 175.1190        | 88.0631         | 158.0924        | 79.5498          |                 |                  | 1 |

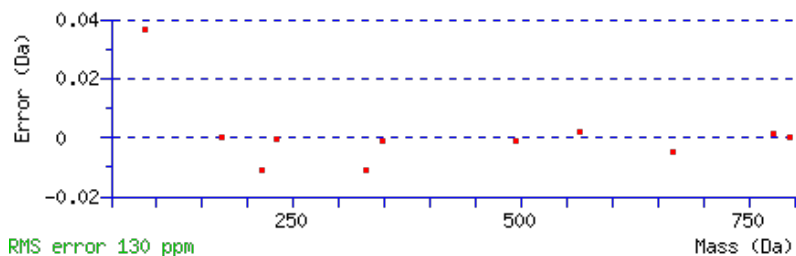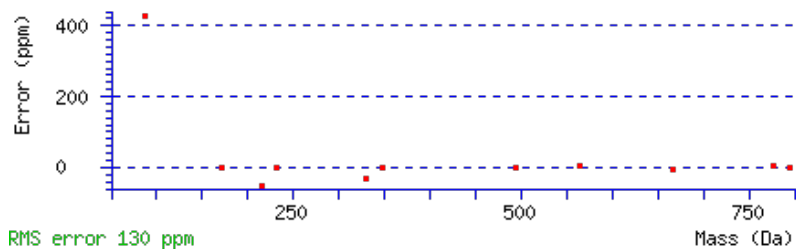

NCBI **BLAST** search of [AVETAENGR](#)  
 (Parameters: blastp, nr protein database, expect=20000, no filter, PAM30)  
 Other BLAST [web gateways](#)

**All matches to this query**

| Score | Mr(calc) | Delta   | Sequence                  |
|-------|----------|---------|---------------------------|
| 56.2  | 964.4614 | 0.0004  | <a href="#">AVETAENGR</a> |
| 6.8   | 964.4614 | 0.0004  | <a href="#">GLQEAQYR</a>  |
| 4.6   | 964.4648 | -0.0030 | <a href="#">AVLQSMSGR</a> |
| 1.1   | 964.4648 | -0.0030 | <a href="#">TLNNVTMR</a>  |
| 1.1   | 962.4556 | 2.0061  | <a href="#">TLNQSSSPK</a> |
| 0.7   | 963.4596 | 1.0021  | <a href="#">TLGHYMAR</a>  |

Mascot: <http://www.matrixscience.com/>

# Mascot Search Results

## Peptide View

MS/MS Fragmentation of **NCELDVTCNIKNGR**

Found in **P00740** in **uni\_human\_nr**, FA9\_HUMAN Coagulation factor IX OS=Homo sapiens GN=F9 PE=1 SV=2

Match to Query 4940: 1692.755082 from(565.258970,3+) intensity(1006666.8125) rtinseconds(1414) scans(6733) index(4487)

Title: 130806\_HPL\_Human\_Plaque\_BR2\_TR2\_10\_Spectrum025408\_scans\_6733\_RTINSECONDS=1414

Data file E:\RAW\HumanPlaques\mgf\T\1D\T130806\_HPL\_Human\_Plaque\_BR2\_TR2\_10.mgf

Click mouse within plot area to zoom in by factor of two about that point

Or,  to  Da

Label all possible matches  Label matches used for scoring

Show Y-axis

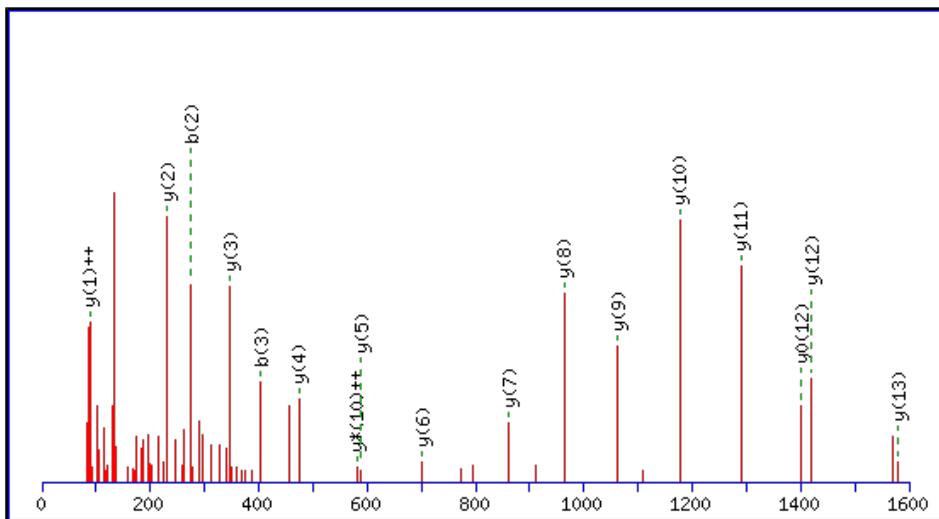

**Monoisotopic mass of neutral peptide Mr(calc):** 1692.7559

**Fixed modifications:** Carbamidomethyl (C) (apply to specified residues or termini only)

**Variable modifications:**

N12 : Deamidated (NQ)

**Ions Score:** 117 **Expect:** 7.2e-011

**Matches :** 17/138 fragment ions using 24 most intense peaks ([help](#))

| #  | b               | b <sup>++</sup> | b <sup>*</sup> | b <sup>*++</sup> | b <sup>0</sup> | b <sup>0++</sup> | Seq. | y                | y <sup>++</sup> | y <sup>*</sup> | y <sup>*++</sup> | y <sup>0</sup>   | y <sup>0++</sup> | #  |
|----|-----------------|-----------------|----------------|------------------|----------------|------------------|------|------------------|-----------------|----------------|------------------|------------------|------------------|----|
| 1  | 115.0502        | 58.0287         | 98.0237        | 49.5155          |                |                  | N    |                  |                 |                |                  |                  |                  | 14 |
| 2  | <b>275.0809</b> | 138.0441        | 258.0543       | 129.5308         |                |                  | C    | <b>1579.7203</b> | 790.3638        | 1562.6938      | 781.8505         | 1561.7097        | 781.3585         | 13 |
| 3  | <b>404.1234</b> | 202.5654        | 387.0969       | 194.0521         | 386.1129       | 193.5601         | E    | <b>1419.6897</b> | 710.3485        | 1402.6631      | 701.8352         | <b>1401.6791</b> | 701.3432         | 12 |
| 4  | 517.2075        | 259.1074        | 500.1810       | 250.5941         | 499.1969       | 250.1021         | L    | <b>1290.6471</b> | 645.8272        | 1273.6205      | 637.3139         | 1272.6365        | 636.8219         | 11 |
| 5  | 632.2345        | 316.6209        | 615.2079       | 308.1076         | 614.2239       | 307.6156         | D    | <b>1177.5630</b> | 589.2851        | 1160.5364      | <b>580.7719</b>  | 1159.5524        | 580.2799         | 10 |
| 6  | 731.3029        | 366.1551        | 714.2763       | 357.6418         | 713.2923       | 357.1498         | V    | <b>1062.5361</b> | 531.7717        | 1045.5095      | 523.2584         | 1044.5255        | 522.7664         | 9  |
| 7  | 832.3505        | 416.6789        | 815.3240       | 408.1656         | 814.3400       | 407.6736         | T    | <b>963.4676</b>  | 482.2375        | 946.4411       | 473.7242         | 945.4571         | 473.2322         | 8  |
| 8  | 992.3812        | 496.6942        | 975.3546       | 488.1810         | 974.3706       | 487.6890         | C    | <b>862.4200</b>  | 431.7136        | 845.3934       | 423.2003         |                  |                  | 7  |
| 9  | 1106.4241       | 553.7157        | 1089.3976      | 545.2024         | 1088.4136      | 544.7104         | N    | <b>702.3893</b>  | 351.6983        | 685.3628       | 343.1850         |                  |                  | 6  |
| 10 | 1219.5082       | 610.2577        | 1202.4816      | 601.7445         | 1201.4976      | 601.2524         | I    | <b>588.3464</b>  | 294.6768        | 571.3198       | 286.1636         |                  |                  | 5  |
| 11 | 1347.6031       | 674.3052        | 1330.5766      | 665.7919         | 1329.5926      | 665.2999         | K    | <b>475.2623</b>  | 238.1348        | 458.2358       | 229.6215         |                  |                  | 4  |
| 12 | 1462.6301       | 731.8187        | 1445.6035      | 723.3054         | 1444.6195      | 722.8134         | N    | <b>347.1674</b>  | 174.0873        | 330.1408       | 165.5740         |                  |                  | 3  |
| 13 | 1519.6516       | 760.3294        | 1502.6250      | 751.8161         | 1501.6410      | 751.3241         | G    | <b>232.1404</b>  | 116.5738        | 215.1139       | 108.0606         |                  |                  | 2  |
| 14 |                 |                 |                |                  |                |                  | R    | 175.1190         | <b>88.0631</b>  | 158.0924       | 79.5498          |                  |                  | 1  |

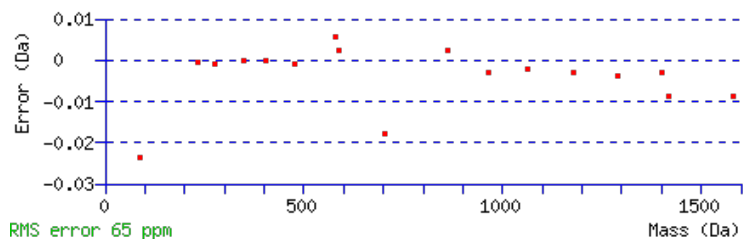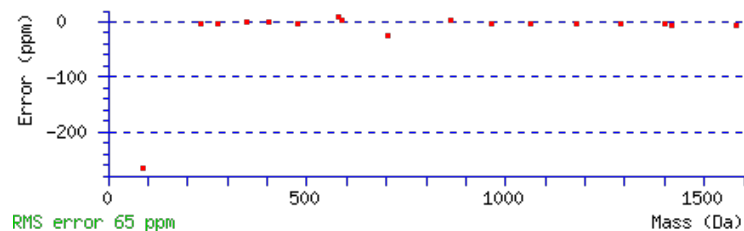

NCBI BLAST search of [NCELDVTCNIKNGR](#)

(Parameters: blastp, nr protein database, expect=20000, no filter, PAM30)

Other BLAST [web gateways](#)

**All matches to this query**

| Score | Mr(calc)  | Delta   | Sequence                        | Site Analysis          |
|-------|-----------|---------|---------------------------------|------------------------|
| 117.3 | 1692.7559 | -0.0009 | <a href="#">NCELDVTCNIKNGR</a>  | Deamidated N12 100.00% |
| 68.6  | 1692.7559 | -0.0009 | <a href="#">NCELDVTCNIKNGR</a>  | Deamidated N9 0.00%    |
| 10.8  | 1690.7468 | 2.0083  | <a href="#">AEEGQDVCLEVETGR</a> |                        |

Mascot: <http://www.matrixscience.com/>

# Mascot Search Results

## Peptide View

MS/MS Fragmentation of **NCELDVTCNIKNGRCEQFCK**

Found in **P00740** in **uni\_human\_nr**, FA9\_HUMAN Coagulation factor IX OS=Homo sapiens GN=F9 PE=1 SV=2

Match to Query 12189: 2544.109812 from(849.043880,3+) intensity(37455.6328) rtinseconds(910) scans(3481) index(1710)

Title: 130806\_HPL\_Human\_Plaque\_BR1\_TR2\_18\_Spectrum021858\_scans\_3481\_RTINSECONDS=910

Data file E:\\RAW\\HumanPlaques\\mgf\\T\\1D\\T130806\_HPL\_Human\_Plaque\_BR1\_TR2\_18.mgf

Click mouse within plot area to zoom in by factor of two about that point

Or,  to  Da

Label all possible matches  Label matches used for scoring

Show Y-axis

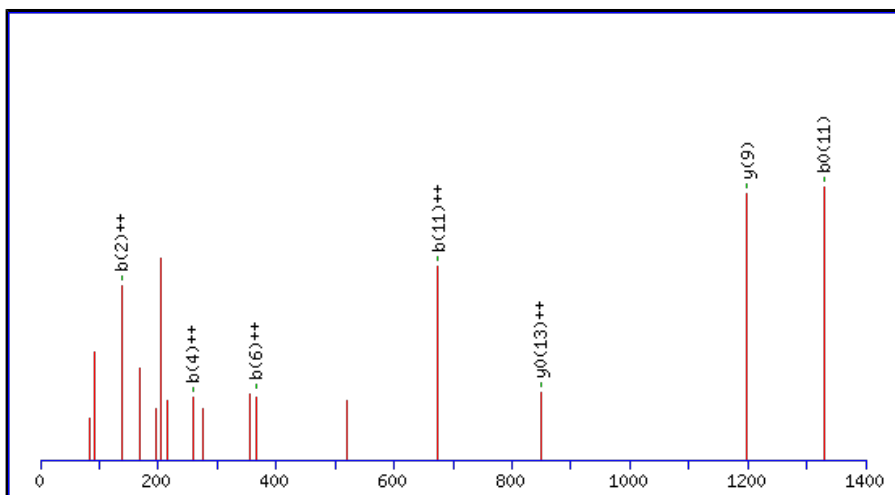

Monoisotopic mass of neutral peptide **Mr(calc): 2544.0978**

Fixed modifications: Carbamidomethyl (C) (apply to specified residues or termini only)

Ions Score: 18 Expect: 0.54

Matches : 7/216 fragment ions using 11 most intense peaks ([help](#))

| #  | b         | b <sup>++</sup> | b <sup>*</sup> | b <sup>*++</sup> | b <sup>0</sup>   | b <sup>0++</sup> | Seq. | y                | y <sup>++</sup> | y <sup>*</sup> | y <sup>*++</sup> | y <sup>0</sup> | y <sup>0++</sup> | #  |
|----|-----------|-----------------|----------------|------------------|------------------|------------------|------|------------------|-----------------|----------------|------------------|----------------|------------------|----|
| 1  | 115.0502  | 58.0287         | 98.0237        | 49.5155          |                  |                  | N    |                  |                 |                |                  |                |                  | 20 |
| 2  | 275.0809  | <b>138.0441</b> | 258.0543       | 129.5308         |                  |                  | C    | 2431.0621        | 1216.0347       | 2414.0356      | 1207.5214        | 2413.0516      | 1207.0294        | 19 |
| 3  | 404.1234  | 202.5654        | 387.0969       | 194.0521         | 386.1129         | 193.5601         | E    | 2271.0315        | 1136.0194       | 2254.0049      | 1127.5061        | 2253.0209      | 1127.0141        | 18 |
| 4  | 517.2075  | <b>259.1074</b> | 500.1810       | 250.5941         | 499.1969         | 250.1021         | L    | 2141.9889        | 1071.4981       | 2124.9623      | 1062.9848        | 2123.9783      | 1062.4928        | 17 |
| 5  | 632.2345  | 316.6209        | 615.2079       | 308.1076         | 614.2239         | 307.6156         | D    | 2028.9048        | 1014.9561       | 2011.8783      | 1006.4428        | 2010.8943      | 1005.9508        | 16 |
| 6  | 731.3029  | <b>366.1551</b> | 714.2763       | 357.6418         | 713.2923         | 357.1498         | V    | 1913.8779        | 957.4426        | 1896.8513      | 948.9293         | 1895.8673      | 948.4373         | 15 |
| 7  | 832.3505  | 416.6789        | 815.3240       | 408.1656         | 814.3400         | 407.6736         | T    | 1814.8095        | 907.9084        | 1797.7829      | 899.3951         | 1796.7989      | 898.9031         | 14 |
| 8  | 992.3812  | 496.6942        | 975.3546       | 488.1810         | 974.3706         | 487.6890         | C    | 1713.7618        | 857.3845        | 1696.7352      | 848.8713         | 1695.7512      | <b>848.3793</b>  | 13 |
| 9  | 1106.4241 | 553.7157        | 1089.3976      | 545.2024         | 1088.4136        | 544.7104         | N    | 1553.7311        | 777.3692        | 1536.7046      | 768.8559         | 1535.7206      | 768.3639         | 12 |
| 10 | 1219.5082 | 610.2577        | 1202.4816      | 601.7445         | 1201.4976        | 601.2524         | I    | 1439.6882        | 720.3477        | 1422.6617      | 711.8345         | 1421.6777      | 711.3425         | 11 |
| 11 | 1347.6031 | <b>674.3052</b> | 1330.5766      | 665.7919         | <b>1329.5926</b> | 665.2999         | K    | 1326.6042        | 663.8057        | 1309.5776      | 655.2924         | 1308.5936      | 654.8004         | 10 |
| 12 | 1461.6461 | 731.3267        | 1444.6195      | 722.8134         | 1443.6355        | 722.3214         | N    | <b>1198.5092</b> | 599.7582        | 1181.4826      | 591.2450         | 1180.4986      | 590.7529         | 9  |
| 13 | 1518.6675 | 759.8374        | 1501.6410      | 751.3241         | 1500.6570        | 750.8321         | G    | 1084.4663        | 542.7368        | 1067.4397      | 534.2235         | 1066.4557      | 533.7315         | 8  |
| 14 | 1674.7686 | 837.8880        | 1657.7421      | 829.3747         | 1656.7581        | 828.8827         | R    | 1027.4448        | 514.2260        | 1010.4182      | 505.7128         | 1009.4342      | 505.2208         | 7  |
| 15 | 1834.7993 | 917.9033        | 1817.7727      | 909.3900         | 1816.7887        | 908.8980         | C    | 871.3437         | 436.1755        | 854.3171       | 427.6622         | 853.3331       | 427.1702         | 6  |
| 16 | 1963.8419 | 982.4246        | 1946.8153      | 973.9113         | 1945.8313        | 973.4193         | E    | 711.3130         | 356.1602        | 694.2865       | 347.6469         | 693.3025       | 347.1549         | 5  |
| 17 | 2091.9005 | 1046.4539       | 2074.8739      | 1037.9406        | 2073.8899        | 1037.4486        | Q    | 582.2704         | 291.6389        | 565.2439       | 283.1256         |                |                  | 4  |
| 18 | 2238.9689 | 1119.9881       | 2221.9423      | 1111.4748        | 2220.9583        | 1110.9828        | F    | 454.2119         | 227.6096        | 437.1853       | 219.0963         |                |                  | 3  |
| 19 | 2398.9995 | 1200.0034       | 2381.9730      | 1191.4901        | 2380.9890        | 1190.9981        | C    | 307.1435         | 154.0754        | 290.1169       | 145.5621         |                |                  | 2  |



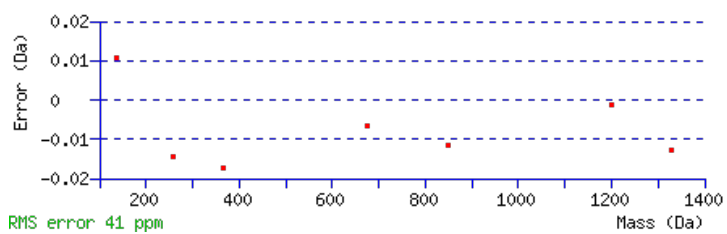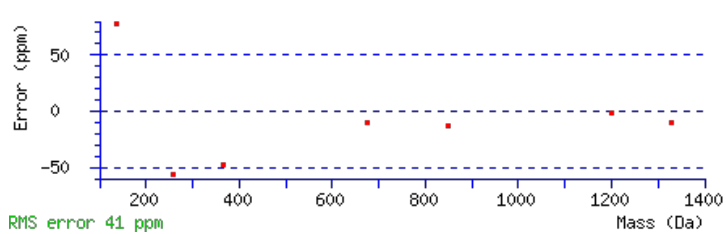

NCBI BLAST search of [NCELDVTCNIKNGRCEQFCK](#)  
 (Parameters: blastp, nr protein database, expect=20000, no filter, PAM30)  
 Other BLAST [web gateways](#)

All matches to this query

| Score | Mr(calcd) | Delta  | Sequence                                |
|-------|-----------|--------|-----------------------------------------|
| 17.6  | 2544.0978 | 0.0120 | <a href="#">NCELDVTCNIKNGRCEQFCK</a>    |
| 0.2   | 2542.1017 | 2.0082 | <a href="#">EEGTEKIGIWNSNSGLNMTDSNK</a> |
| 0.2   | 2542.1017 | 2.0082 | <a href="#">EEGTEKIGIWNSNSGLNMTDSNK</a> |
| 0.2   | 2542.1017 | 2.0082 | <a href="#">EEGTEKIGIWNSNSGLNMTDSNK</a> |

Mascot: <http://www.matrixscience.com/>

# Mascot Search Results

## Peptide View

MS/MS Fragmentation of **DIDECLQNGR**

Found in **P35555** in **uni\_human\_nr**, FBN1\_HUMAN Fibrillin-1 OS=Homo sapiens GN=FBN1 PE=1 SV=3

Match to Query 1623: 1219.513768 from(610.764160,2+) intensity(1292732.0000) rtinseconds(1416) scans(6546) index(4319)

Title: 130801\_HPL\_Human\_Plaque\_BR2\_TR1\_20\_Spectrum023221\_scans\_6546\_RTINSECONDS=1416

Data file E:\RAW\HumanPlaques\mgf\T\1D\T130801\_HPL\_Human\_Plaque\_BR2\_TR1\_20.mgf

Click mouse within plot area to zoom in by factor of two about that point

Or,  to  Da

Label all possible matches  Label matches used for scoring

Show Y-axis

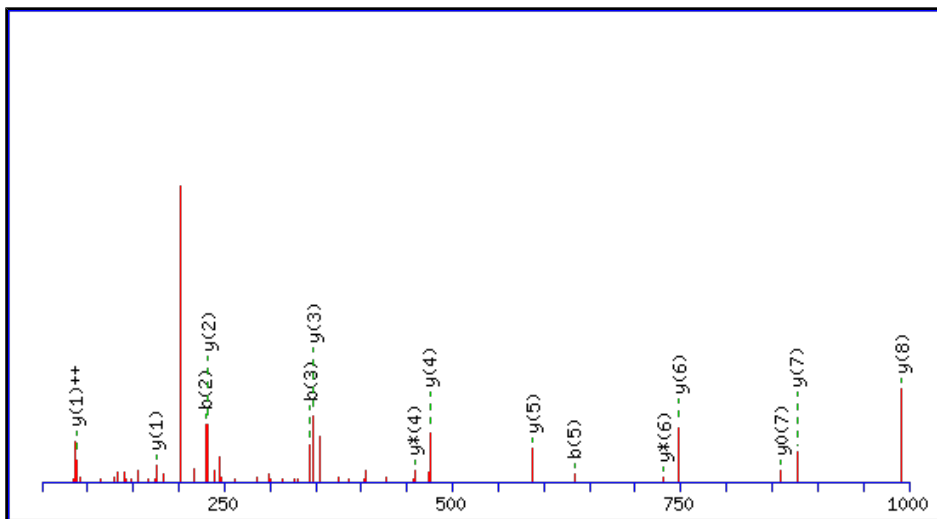

Monoisotopic mass of neutral peptide **Mr(calc)**: 1219.5139

**Fixed modifications**: Carbamidomethyl (C) (apply to specified residues or termini only)

**Variable modifications**:

**N8** : Deamidated (NQ)

**Ions Score**: 73 **Expect**: 4.7e-007

**Matches** : 15/84 fragment ions using 19 most intense peaks ([help](#))

| #  | b               | b <sup>++</sup> | b <sup>*</sup> | b <sup>*++</sup> | b <sup>0</sup> | b <sup>0++</sup> | Seq. | y               | y <sup>++</sup> | y <sup>*</sup>  | y <sup>*++</sup> | y <sup>0</sup>  | y <sup>0++</sup> | #  |
|----|-----------------|-----------------|----------------|------------------|----------------|------------------|------|-----------------|-----------------|-----------------|------------------|-----------------|------------------|----|
| 1  | 116.0342        | 58.5207         |                |                  | 98.0237        | 49.5155          | D    |                 |                 |                 |                  |                 |                  | 10 |
| 2  | <b>229.1183</b> | 115.0628        |                |                  | 211.1077       | 106.0575         | I    | 1105.4943       | 553.2508        | 1088.4677       | 544.7375         | 1087.4837       | 544.2455         | 9  |
| 3  | <b>344.1452</b> | 172.5763        |                |                  | 326.1347       | 163.5710         | D    | <b>992.4102</b> | 496.7087        | 975.3836        | 488.1955         | 974.3996        | 487.7034         | 8  |
| 4  | 473.1878        | 237.0975        |                |                  | 455.1773       | 228.0923         | E    | <b>877.3832</b> | 439.1953        | 860.3567        | 430.6820         | <b>859.3727</b> | 430.1900         | 7  |
| 5  | <b>633.2185</b> | 317.1129        |                |                  | 615.2079       | 308.1076         | C    | <b>748.3407</b> | 374.6740        | <b>731.3141</b> | 366.1607         |                 |                  | 6  |
| 6  | 746.3025        | 373.6549        |                |                  | 728.2920       | 364.6496         | L    | <b>588.3100</b> | 294.6586        | 571.2835        | 286.1454         |                 |                  | 5  |
| 7  | 874.3611        | 437.6842        | 857.3346       | 429.1709         | 856.3505       | 428.6789         | Q    | <b>475.2259</b> | 238.1166        | <b>458.1994</b> | 229.6033         |                 |                  | 4  |
| 8  | 989.3881        | 495.1977        | 972.3615       | 486.6844         | 971.3775       | 486.1924         | N    | <b>347.1674</b> | 174.0873        | 330.1408        | 165.5740         |                 |                  | 3  |
| 9  | 1046.4095       | 523.7084        | 1029.3830      | 515.1951         | 1028.3990      | 514.7031         | G    | <b>232.1404</b> | 116.5738        | 215.1139        | 108.0606         |                 |                  | 2  |
| 10 |                 |                 |                |                  |                |                  | R    | <b>175.1190</b> | <b>88.0631</b>  | 158.0924        | 79.5498          |                 |                  | 1  |

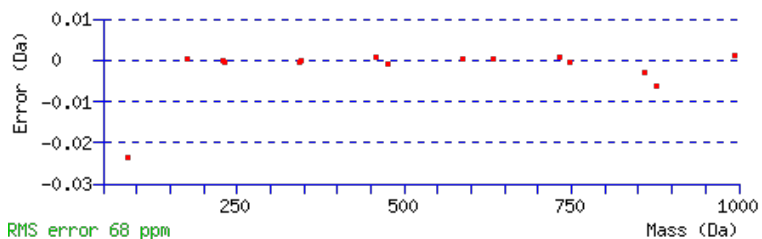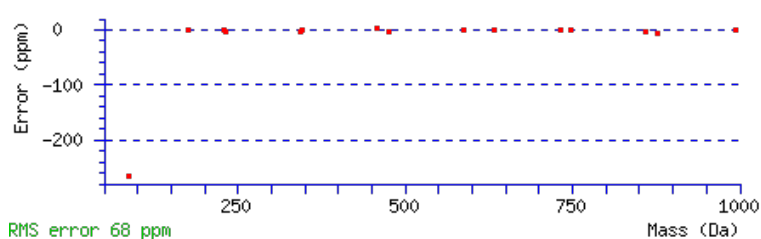

NCBI BLAST search of [DIDECLQNGR](#)

(Parameters: blastp, nr protein database, expect=20000, no filter, PAM30)

Other BLAST [web gateways](#)

**All matches to this query**

| Score | Mr(calc)  | Delta   | Sequence                   | Site Analysis        |
|-------|-----------|---------|----------------------------|----------------------|
| 73.3  | 1219.5139 | -0.0001 | <a href="#">DIDECLQNGR</a> | Deamidated N8 97.72% |
| 57.0  | 1219.5139 | -0.0001 | <a href="#">DIDECLQNGR</a> | Deamidated Q7 2.28%  |
| 3.7   | 1219.5148 | -0.0010 | <a href="#">ENCMMHLLR</a>  |                      |
| 3.7   | 1219.5148 | -0.0010 | <a href="#">ENCMMHLLR</a>  |                      |

Mascot: <http://www.matrixscience.com/>

# Mascot Search Results

## Peptide View

MS/MS Fragmentation of **DIDECLQNGR**

Found in **P35555** in **uni\_human\_nr**, FBN1\_HUMAN Fibrillin-1 OS=Homo sapiens GN=FBN1 PE=1 SV=3

Match to Query 1451: 1218.530008 from(610.272280,2+) intensity(497201.5938) rtinseconds(1339) scans(6100) index(3836)

Title: 130801\_HPL\_Human\_Plaque\_BR1\_TR1\_17\_Spectrum024000\_scans\_6100\_RTINSECONDS=1339

Data file E:\RAW\HumanPlaques\mgf\T\1D\T130801\_HPL\_Human\_Plaque\_BR1\_TR1\_17.mgf

Click mouse within plot area to zoom in by factor of two about that point

Or,  to  Da

Label all possible matches  Label matches used for scoring

Show Y-axis

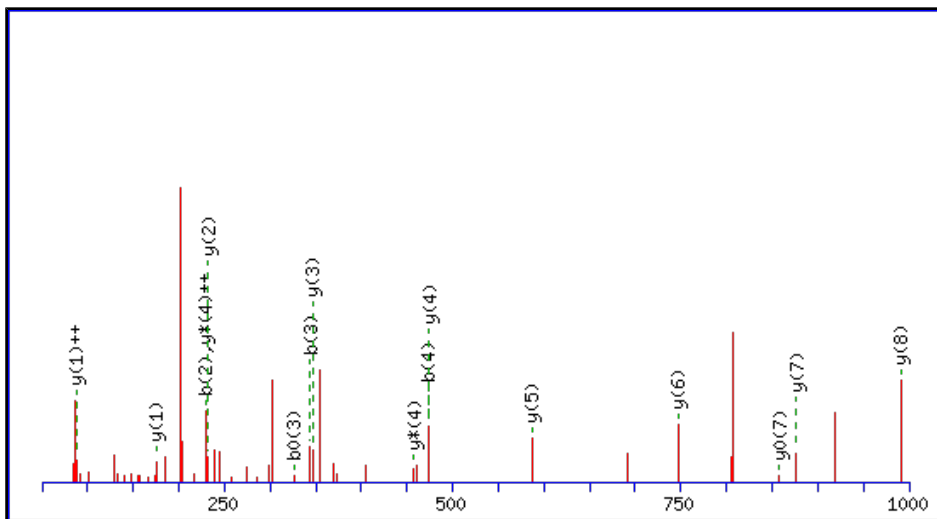

Monoisotopic mass of neutral peptide **Mr(calc)**: 1218.5299

Fixed modifications: Carbamidomethyl (C) (apply to specified residues or termini only)

Ions Score: 42 Expect: 0.00085

Matches : 16/84 fragment ions using 40 most intense peaks ([help](#))

| #  | b               | b <sup>++</sup> | b <sup>*</sup> | b <sup>*++</sup> | b <sup>0</sup>  | b <sup>0++</sup> | Seq. | y               | y <sup>++</sup> | y <sup>*</sup>  | y <sup>*++</sup> | y <sup>0</sup>  | y <sup>0++</sup> | #  |
|----|-----------------|-----------------|----------------|------------------|-----------------|------------------|------|-----------------|-----------------|-----------------|------------------|-----------------|------------------|----|
| 1  | 116.0342        | 58.5207         |                |                  | 98.0237         | 49.5155          | D    |                 |                 |                 |                  |                 |                  | 10 |
| 2  | <b>229.1183</b> | 115.0628        |                |                  | 211.1077        | 106.0575         | I    | 1104.5102       | 552.7588        | 1087.4837       | 544.2455         | 1086.4997       | 543.7535         | 9  |
| 3  | <b>344.1452</b> | 172.5763        |                |                  | <b>326.1347</b> | 163.5710         | D    | <b>991.4262</b> | 496.2167        | 974.3996        | 487.7034         | 973.4156        | 487.2114         | 8  |
| 4  | <b>473.1878</b> | 237.0975        |                |                  | 455.1773        | 228.0923         | E    | <b>876.3992</b> | 438.7033        | 859.3727        | 430.1900         | <b>858.3887</b> | 429.6980         | 7  |
| 5  | 633.2185        | 317.1129        |                |                  | 615.2079        | 308.1076         | C    | <b>747.3566</b> | 374.1820        | 730.3301        | 365.6687         |                 |                  | 6  |
| 6  | 746.3025        | 373.6549        |                |                  | 728.2920        | 364.6496         | L    | <b>587.3260</b> | 294.1666        | 570.2994        | 285.6534         |                 |                  | 5  |
| 7  | 874.3611        | 437.6842        | 857.3346       | 429.1709         | 856.3505        | 428.6789         | Q    | <b>474.2419</b> | 237.6246        | <b>457.2154</b> | <b>229.1113</b>  |                 |                  | 4  |
| 8  | 988.4040        | 494.7057        | 971.3775       | 486.1924         | 970.3935        | 485.7004         | N    | <b>346.1833</b> | 173.5953        | 329.1568        | 165.0820         |                 |                  | 3  |
| 9  | 1045.4255       | 523.2164        | 1028.3990      | 514.7031         | 1027.4149       | 514.2111         | G    | <b>232.1404</b> | 116.5738        | 215.1139        | 108.0606         |                 |                  | 2  |
| 10 |                 |                 |                |                  |                 |                  | R    | <b>175.1190</b> | <b>88.0631</b>  | 158.0924        | 79.5498          |                 |                  | 1  |

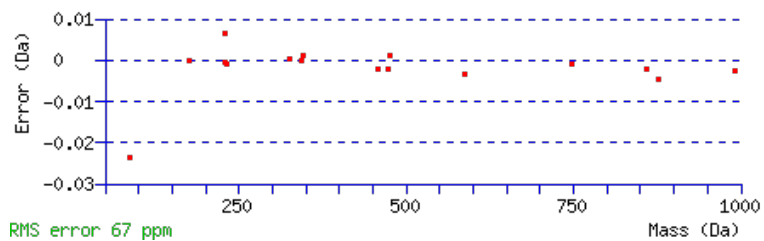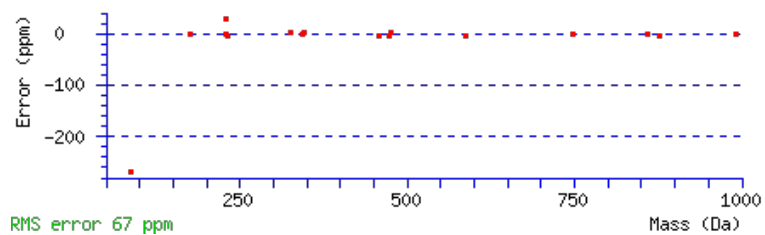

NCBI BLAST search of [DIDECLQNGR](#)

(Parameters: blastp, nr protein database, expect=20000, no filter, PAM30)

Other BLAST [web gateways](#)

**All matches to this query**

| Score | Mr(calc)  | Delta  | Sequence                   |
|-------|-----------|--------|----------------------------|
| 42.0  | 1218.5299 | 0.0001 | <a href="#">DIDECLQNGR</a> |

Mascot: <http://www.matrixscience.com/>

# Mascot Search Results

## Peptide View

MS/MS Fragmentation of **DIDECLQNGRICNNGR**

Found in **P35555** in **uni\_human\_nr**, FBN1\_HUMAN Fibrillin-1 OS=Homo sapiens GN=FBN1 PE=1 SV=3

Match to Query 7398: 1936.807572 from(646.609800,3+) intensity(123260.1719) rtinseconds(1738) scans(9002) index(6725)

Title: 130806\_HPL\_Human\_Plaque\_BR1\_TR2\_20\_Spectrum026593\_scans\_9002\_RTINSECONDS=1738

Data file E:\RAW\HumanPlaques\mgf\T\1D\T130806\_HPL\_Human\_Plaque\_BR1\_TR2\_20.mgf

Click mouse within plot area to zoom in by factor of two about that point

Or,  to  Da

Label all possible matches  Label matches used for scoring

Show Y-axis

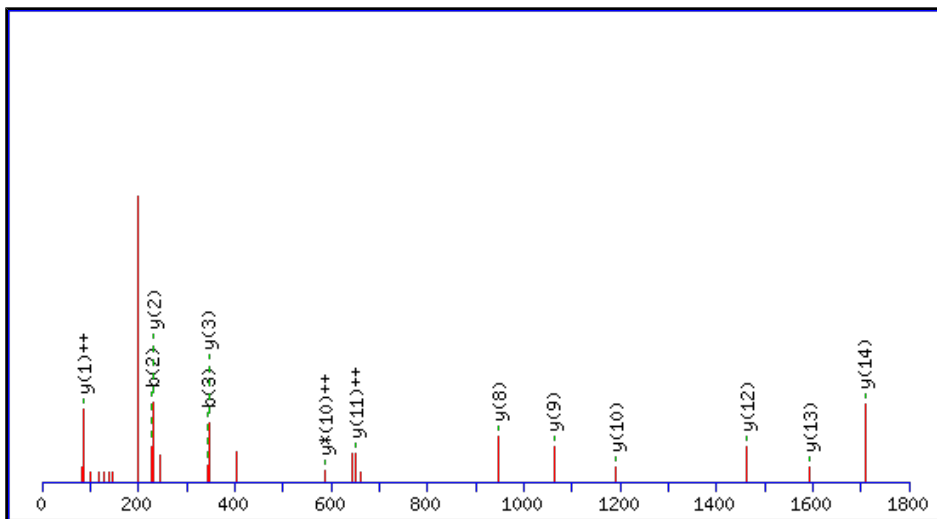

Monoisotopic mass of neutral peptide Mr(calc): 1935.8051

Fixed modifications: Carbamidomethyl (C) (apply to specified residues or termini only)

Variable modifications:

N8 : Deamidated (NQ)

N13 : Deamidated (NQ)

N14 : Deamidated (NQ)

Ions Score: 59 Expect: 2e-005

Matches : 13/144 fragment ions using 18 most intense peaks ([help](#))

| #  | b               | b <sup>++</sup> | b*        | b <sup>+++</sup> | b <sup>0</sup> | b <sup>0++</sup> | Seq. | y                | y <sup>++</sup> | y*        | y <sup>+++</sup> | y <sup>0</sup> | y <sup>0++</sup> | #  |
|----|-----------------|-----------------|-----------|------------------|----------------|------------------|------|------------------|-----------------|-----------|------------------|----------------|------------------|----|
| 1  | 116.0342        | 58.5207         |           |                  | 98.0237        | 49.5155          | D    |                  |                 |           |                  |                |                  | 16 |
| 2  | <b>229.1183</b> | 115.0628        |           |                  | 211.1077       | 106.0575         | I    | 1821.7854        | 911.3963        | 1804.7589 | 902.8831         | 1803.7749      | 902.3911         | 15 |
| 3  | <b>344.1452</b> | 172.5763        |           |                  | 326.1347       | 163.5710         | D    | <b>1708.7014</b> | 854.8543        | 1691.6748 | 846.3410         | 1690.6908      | 845.8490         | 14 |
| 4  | 473.1878        | 237.0975        |           |                  | 455.1773       | 228.0923         | E    | <b>1593.6744</b> | 797.3408        | 1576.6479 | 788.8276         | 1575.6639      | 788.3356         | 13 |
| 5  | 633.2185        | 317.1129        |           |                  | 615.2079       | 308.1076         | C    | <b>1464.6318</b> | 732.8196        | 1447.6053 | 724.3063         |                |                  | 12 |
| 6  | 746.3025        | 373.6549        |           |                  | 728.2920       | 364.6496         | L    | 1304.6012        | <b>652.8042</b> | 1287.5746 | 644.2910         |                |                  | 11 |
| 7  | 874.3611        | 437.6842        | 857.3346  | 429.1709         | 856.3505       | 428.6789         | Q    | <b>1191.5171</b> | 596.2622        | 1174.4906 | <b>587.7489</b>  |                |                  | 10 |
| 8  | 989.3881        | 495.1977        | 972.3615  | 486.6844         | 971.3775       | 486.1924         | N    | <b>1063.4585</b> | 532.2329        | 1046.4320 | 523.7196         |                |                  | 9  |
| 9  | 1046.4095       | 523.7084        | 1029.3830 | 515.1951         | 1028.3990      | 514.7031         | G    | <b>948.4316</b>  | 474.7194        | 931.4050  | 466.2062         |                |                  | 8  |
| 10 | 1202.5106       | 601.7590        | 1185.4841 | 593.2457         | 1184.5001      | 592.7537         | R    | 891.4101         | 446.2087        | 874.3836  | 437.6954         |                |                  | 7  |
| 11 | 1315.5947       | 658.3010        | 1298.5681 | 649.7877         | 1297.5841      | 649.2957         | I    | 735.3090         | 368.1581        | 718.2825  | 359.6449         |                |                  | 6  |
| 12 | 1475.6253       | 738.3163        | 1458.5988 | 729.8030         | 1457.6148      | 729.3110         | C    | 622.2250         | 311.6161        | 605.1984  | 303.1028         |                |                  | 5  |
| 13 | 1590.6523       | 795.8298        | 1573.6257 | 787.3165         | 1572.6417      | 786.8245         | N    | 462.1943         | 231.6008        | 445.1678  | 223.0875         |                |                  | 4  |
| 14 | 1705.6792       | 853.3433        | 1688.6527 | 844.8300         | 1687.6687      | 844.3380         | N    | <b>347.1674</b>  | 174.0873        | 330.1408  | 165.5740         |                |                  | 3  |

|    |           |          |           |          |           |          |   |          |          |          |          |  |  |   |
|----|-----------|----------|-----------|----------|-----------|----------|---|----------|----------|----------|----------|--|--|---|
| 15 | 1762.7007 | 881.8540 | 1745.6741 | 873.3407 | 1744.6901 | 872.8487 | G | 232.1404 | 116.5738 | 215.1139 | 108.0606 |  |  | 2 |
| 16 |           |          |           |          |           |          | R | 175.1190 | 88.0631  | 158.0924 | 79.5498  |  |  | 1 |

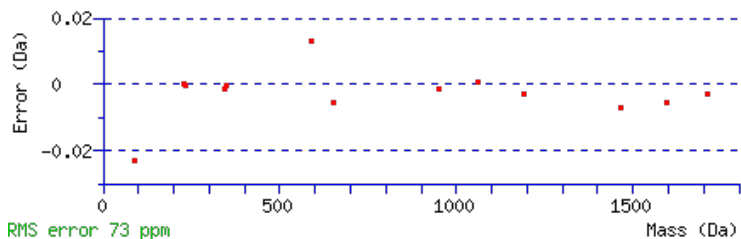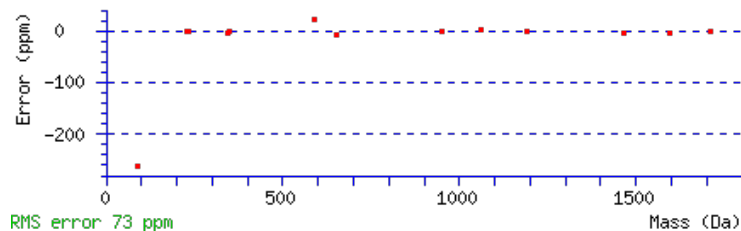

NCBI BLAST search of [DIDECLQNGRICNNGR](#)

(Parameters: blastp, nr protein database, expect=20000, no filter, PAM30)

Other BLAST [web gateways](#)

All matches to this query

| Score | Mr(calc)  | Delta  | Sequence                          | Site Analysis                  |
|-------|-----------|--------|-----------------------------------|--------------------------------|
| 58.5  | 1935.8051 | 1.0025 | <a href="#">DIDECLQNGRICNNGR</a>  | Deamidated N8, N13, N14 95.33% |
| 45.1  | 1935.8051 | 1.0025 | <a href="#">DIDECLQNGRICNNGR</a>  | Deamidated Q7, N13, N14 4.38%  |
| 33.0  | 1935.8051 | 1.0025 | <a href="#">DIDECLQNGRICNNGR</a>  | Deamidated Q7, N8, N14 0.27%   |
| 22.2  | 1935.8051 | 1.0025 | <a href="#">DIDECLQNGRICNNGR</a>  | Deamidated Q7, N8, N13 0.02%   |
| 3.4   | 1935.7970 | 1.0106 | <a href="#">SLDWENPTEREDDSK</a>   |                                |
| 1.1   | 1936.8034 | 0.0041 | <a href="#">AEGSSQSWRQEEEEQR</a>  |                                |
| 1.1   | 1936.8034 | 0.0041 | <a href="#">AEGSSQSWRQEEEEQR</a>  |                                |
| 1.1   | 1936.8034 | 0.0041 | <a href="#">AEGSSQSWRQEEEEQR</a>  |                                |
| 0.6   | 1934.7986 | 2.0090 | <a href="#">EAGQGKDMMEEEAPEER</a> |                                |

Mascot: <http://www.matrixscience.com/>

# Mascot Search Results

## Peptide View

MS/MS Fragmentation of **DIDECLQNGRICNNGR**

Found in **P35555** in **uni\_human\_nr**, FBN1\_HUMAN Fibrillin-1 OS=Homo sapiens GN=FBN1 PE=1 SV=3

Match to Query 8257: 1934.820162 from(645.947330,3+) intensity(1058828.1250) rtinseconds(1687) scans(8481) index(6125)

Title: 130806\_HPL\_Human\_Plaque\_BR2\_TR2\_20\_Spectrum025338\_scans\_8481\_RTINSECONDS=1687

Data file E:\RAW\HumanPlaques\mgf\T\1D\T130806\_HPL\_Human\_Plaque\_BR2\_TR2\_20.mgf

Click mouse within plot area to zoom in by factor of two about that point

Or,  to  Da

Label all possible matches  Label matches used for scoring

Show Y-axis

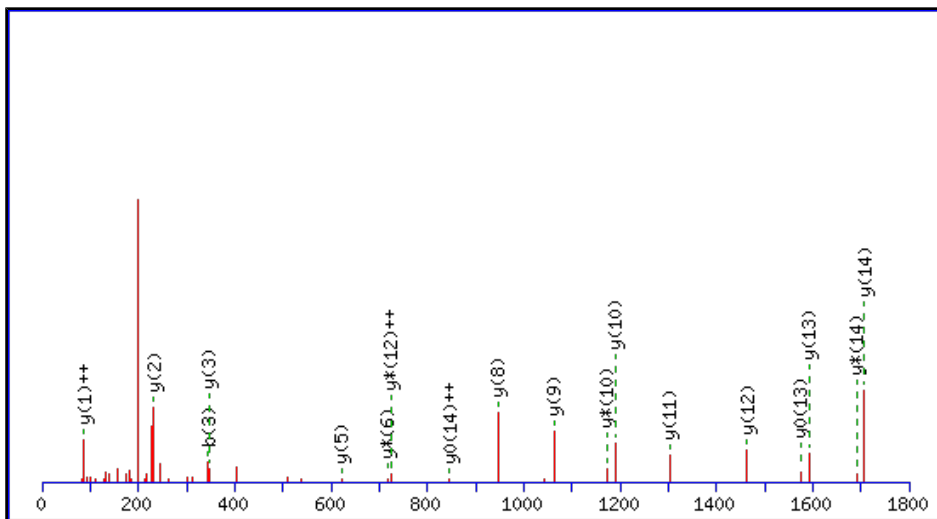

Monoisotopic mass of neutral peptide Mr(calc): 1934.8210

Fixed modifications: Carbamidomethyl (C) (apply to specified residues or termini only)

Variable modifications:

N8 : Deamidated (NQ)

N13 : Deamidated (NQ)

Ions Score: 80 Expect: 1.7e-007

Matches : 18/144 fragment ions using 24 most intense peaks ([help](#))

| #  | b               | b <sup>++</sup> | b*        | b <sup>+++</sup> | b <sup>0</sup> | b <sup>0++</sup> | Seq. | y                | y <sup>++</sup> | y*               | y <sup>+++</sup> | y <sup>0</sup>   | y <sup>0++</sup> | #  |
|----|-----------------|-----------------|-----------|------------------|----------------|------------------|------|------------------|-----------------|------------------|------------------|------------------|------------------|----|
| 1  | 116.0342        | 58.5207         |           |                  | 98.0237        | 49.5155          | D    |                  |                 |                  |                  |                  |                  | 16 |
| 2  | 229.1183        | 115.0628        |           |                  | 211.1077       | 106.0575         | I    | 1820.8014        | 910.9043        | 1803.7749        | 902.3911         | 1802.7908        | 901.8991         | 15 |
| 3  | <b>344.1452</b> | 172.5763        |           |                  | 326.1347       | 163.5710         | D    | <b>1707.7173</b> | 854.3623        | <b>1690.6908</b> | 845.8490         | 1689.7068        | <b>845.3570</b>  | 14 |
| 4  | 473.1878        | 237.0975        |           |                  | 455.1773       | 228.0923         | E    | <b>1592.6904</b> | 796.8488        | 1575.6639        | 788.3356         | <b>1574.6798</b> | 787.8436         | 13 |
| 5  | 633.2185        | 317.1129        |           |                  | 615.2079       | 308.1076         | C    | <b>1463.6478</b> | 732.3275        | 1446.6213        | <b>723.8143</b>  |                  |                  | 12 |
| 6  | 746.3025        | 373.6549        |           |                  | 728.2920       | 364.6496         | L    | <b>1303.6172</b> | 652.3122        | 1286.5906        | 643.7989         |                  |                  | 11 |
| 7  | 874.3611        | 437.6842        | 857.3346  | 429.1709         | 856.3505       | 428.6789         | Q    | <b>1190.5331</b> | 595.7702        | <b>1173.5065</b> | 587.2569         |                  |                  | 10 |
| 8  | 989.3881        | 495.1977        | 972.3615  | 486.6844         | 971.3775       | 486.1924         | N    | <b>1062.4745</b> | 531.7409        | 1045.4480        | 523.2276         |                  |                  | 9  |
| 9  | 1046.4095       | 523.7084        | 1029.3830 | 515.1951         | 1028.3990      | 514.7031         | G    | <b>947.4476</b>  | 474.2274        | 930.4210         | 465.7142         |                  |                  | 8  |
| 10 | 1202.5106       | 601.7590        | 1185.4841 | 593.2457         | 1184.5001      | 592.7537         | R    | 890.4261         | 445.7167        | 873.3996         | 437.2034         |                  |                  | 7  |
| 11 | 1315.5947       | 658.3010        | 1298.5681 | 649.7877         | 1297.5841      | 649.2957         | I    | 734.3250         | 367.6661        | <b>717.2984</b>  | 359.1529         |                  |                  | 6  |
| 12 | 1475.6253       | 738.3163        | 1458.5988 | 729.8030         | 1457.6148      | 729.3110         | C    | <b>621.2409</b>  | 311.1241        | 604.2144         | 302.6108         |                  |                  | 5  |
| 13 | 1590.6523       | 795.8298        | 1573.6257 | 787.3165         | 1572.6417      | 786.8245         | N    | 461.2103         | 231.1088        | 444.1837         | 222.5955         |                  |                  | 4  |
| 14 | 1704.6952       | 852.8512        | 1687.6687 | 844.3380         | 1686.6846      | 843.8460         | N    | <b>346.1833</b>  | 173.5953        | 329.1568         | 165.0820         |                  |                  | 3  |
| 15 | 1761.7167       | 881.3620        | 1744.6901 | 872.8487         | 1743.7061      | 872.3567         | G    | <b>232.1404</b>  | 116.5738        | 215.1139         | 108.0606         |                  |                  | 2  |



16 | | | | | | | | | | **R** | 175.1190 | 88.0631 | 158.0924 | 79.5498 | | | | | **1**

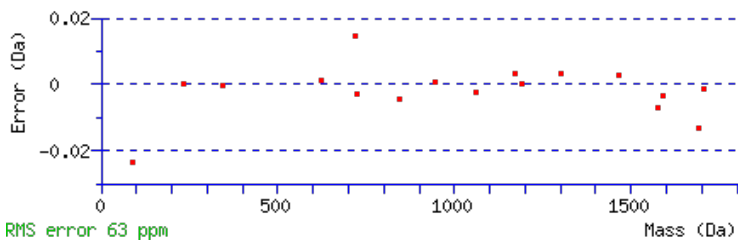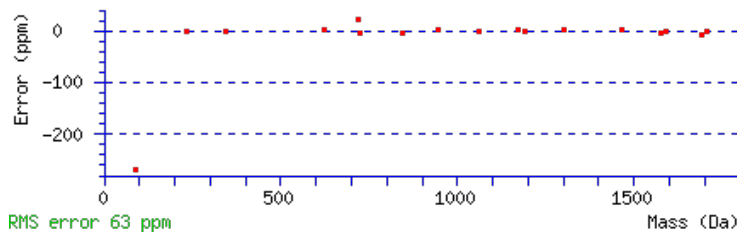

NCBI BLAST search of [DIDECLQNGRICNNGR](#)  
 (Parameters: blastp, nr protein database, expect=20000, no filter, PAM30)  
 Other BLAST [web gateways](#)

**All matches to this query**

| Score | Mr(calc)  | Delta   | Sequence                         | Site Analysis             |
|-------|-----------|---------|----------------------------------|---------------------------|
| 80.0  | 1934.8210 | -0.0009 | <a href="#">DIDECLQNGRICNNGR</a> | Deamidated N8, N13 90.44% |
| 68.1  | 1934.8210 | -0.0009 | <a href="#">DIDECLQNGRICNNGR</a> | Deamidated Q7, N13 5.89%  |
| 65.7  | 1934.8210 | -0.0009 | <a href="#">DIDECLQNGRICNNGR</a> | Deamidated N8, N14 3.39%  |
| 54.6  | 1934.8210 | -0.0009 | <a href="#">DIDECLQNGRICNNGR</a> | Deamidated Q7, N14 0.27%  |
| 39.9  | 1934.8210 | -0.0009 | <a href="#">DIDECLQNGRICNNGR</a> | Deamidated Q7, N8 0.01%   |
| 38.3  | 1934.8210 | -0.0009 | <a href="#">DIDECLQNGRICNNGR</a> | Deamidated N13, N14 0.01% |
| 0.6   | 1933.8087 | 1.0115  | <a href="#">RENMYYSQSSMEPHR</a>  |                           |

Mascot: <http://www.matrixscience.com/>

# Mascot Search Results

## Peptide View

MS/MS Fragmentation of **DIDECLQNGRICNNGR**

Found in **P35555** in **uni\_human\_nr**, FBN1\_HUMAN Fibrillin-1 OS=Homo sapiens GN=FBN1 PE=1 SV=3

Match to Query 7548: 1934.820882 from(645.947570,3+) intensity(143663.5938) rtinseconds(1660) scans(8255) index(5772)

Title: 130801\_HPL\_Human\_Plaque\_BR1\_TR1\_18\_Spectrum025423\_scans\_8255\_RTINSECONDS=1660

Data file E:\RAW\HumanPlaques\mgf\T\1D\T130801\_HPL\_Human\_Plaque\_BR1\_TR1\_18.mgf

Click mouse within plot area to zoom in by factor of two about that point

Or,  to  Da

Label all possible matches  Label matches used for scoring

Show Y-axis

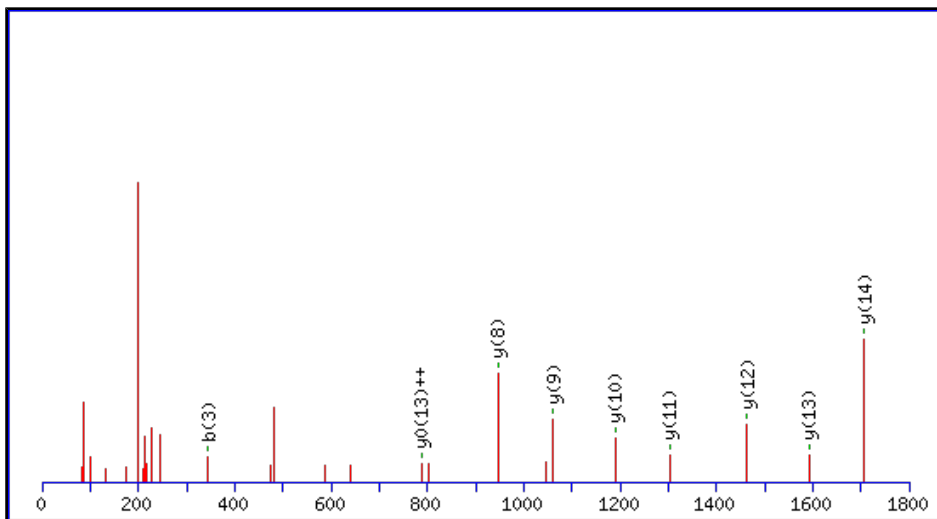

Monoisotopic mass of neutral peptide Mr(calc): 1934.8210

Fixed modifications: Carbamidomethyl (C) (apply to specified residues or termini only)

Variable modifications:

Q7 : Deamidated (NQ)

N8 : Deamidated (NQ)

Ions Score: 48 Expect: 0.00025

Matches : 9/144 fragment ions using 13 most intense peaks ([help](#))

| #  | b               | b <sup>++</sup> | b <sup>*</sup> | b <sup>*++</sup> | b <sup>0</sup> | b <sup>0++</sup> | Seq. | y                | y <sup>++</sup> | y <sup>*</sup> | y <sup>*++</sup> | y <sup>0</sup> | y <sup>0++</sup> | #  |
|----|-----------------|-----------------|----------------|------------------|----------------|------------------|------|------------------|-----------------|----------------|------------------|----------------|------------------|----|
| 1  | 116.0342        | 58.5207         |                |                  | 98.0237        | 49.5155          | D    |                  |                 |                |                  |                |                  | 16 |
| 2  | 229.1183        | 115.0628        |                |                  | 211.1077       | 106.0575         | I    | 1820.8014        | 910.9043        | 1803.7749      | 902.3911         | 1802.7908      | 901.8991         | 15 |
| 3  | <b>344.1452</b> | 172.5763        |                |                  | 326.1347       | 163.5710         | D    | <b>1707.7173</b> | 854.3623        | 1690.6908      | 845.8490         | 1689.7068      | 845.3570         | 14 |
| 4  | 473.1878        | 237.0975        |                |                  | 455.1773       | 228.0923         | E    | <b>1592.6904</b> | 796.8488        | 1575.6639      | 788.3356         | 1574.6798      | <b>787.8436</b>  | 13 |
| 5  | 633.2185        | 317.1129        |                |                  | 615.2079       | 308.1076         | C    | <b>1463.6478</b> | 732.3275        | 1446.6213      | 723.8143         |                |                  | 12 |
| 6  | 746.3025        | 373.6549        |                |                  | 728.2920       | 364.6496         | L    | <b>1303.6172</b> | 652.3122        | 1286.5906      | 643.7989         |                |                  | 11 |
| 7  | 875.3451        | 438.1762        | 858.3186       | 429.6629         | 857.3346       | 429.1709         | Q    | <b>1190.5331</b> | 595.7702        | 1173.5065      | 587.2569         |                |                  | 10 |
| 8  | 990.3721        | 495.6897        | 973.3455       | 487.1764         | 972.3615       | 486.6844         | N    | <b>1061.4905</b> | 531.2489        | 1044.4640      | 522.7356         |                |                  | 9  |
| 9  | 1047.3935       | 524.2004        | 1030.3670      | 515.6871         | 1029.3830      | 515.1951         | G    | <b>946.4636</b>  | 473.7354        | 929.4370       | 465.2221         |                |                  | 8  |
| 10 | 1203.4946       | 602.2510        | 1186.4681      | 593.7377         | 1185.4841      | 593.2457         | R    | 889.4421         | 445.2247        | 872.4155       | 436.7114         |                |                  | 7  |
| 11 | 1316.5787       | 658.7930        | 1299.5522      | 650.2797         | 1298.5681      | 649.7877         | I    | 733.3410         | 367.1741        | 716.3144       | 358.6609         |                |                  | 6  |
| 12 | 1476.6094       | 738.8083        | 1459.5828      | 730.2950         | 1458.5988      | 729.8030         | C    | 620.2569         | 310.6321        | 603.2304       | 302.1188         |                |                  | 5  |
| 13 | 1590.6523       | 795.8298        | 1573.6257      | 787.3165         | 1572.6417      | 786.8245         | N    | 460.2263         | 230.6168        | 443.1997       | 222.1035         |                |                  | 4  |
| 14 | 1704.6952       | 852.8512        | 1687.6687      | 844.3380         | 1686.6846      | 843.8460         | N    | 346.1833         | 173.5953        | 329.1568       | 165.0820         |                |                  | 3  |
| 15 | 1761.7167       | 881.3620        | 1744.6901      | 872.8487         | 1743.7061      | 872.3567         | G    | 232.1404         | 116.5738        | 215.1139       | 108.0606         |                |                  | 2  |

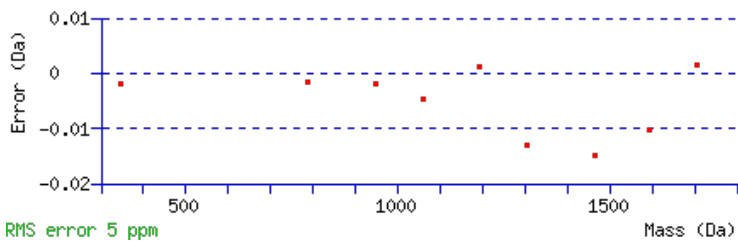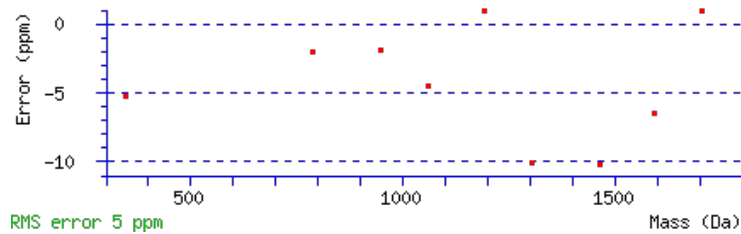

NCBI BLAST search of [DIDECLQNGRICNNGR](#)

(Parameters: blastp, nr protein database, expect=20000, no filter, PAM30)

Other BLAST [web gateways](#)

All matches to this query

| Score | Mr(calc)  | Delta   | Sequence                         | Site Analysis             |
|-------|-----------|---------|----------------------------------|---------------------------|
| 48.5  | 1934.8210 | -0.0002 | <a href="#">DIDECLQNGRICNNGR</a> | Deamidated Q7, N8 91.64%  |
| 34.6  | 1934.8210 | -0.0002 | <a href="#">DIDECLQNGRICNNGR</a> | Deamidated Q7, N14 3.80%  |
| 34.6  | 1934.8210 | -0.0002 | <a href="#">DIDECLQNGRICNNGR</a> | Deamidated Q7, N13 3.80%  |
| 22.8  | 1934.8210 | -0.0002 | <a href="#">DIDECLQNGRICNNGR</a> | Deamidated N13, N14 0.25% |
| 22.8  | 1934.8210 | -0.0002 | <a href="#">DIDECLQNGRICNNGR</a> | Deamidated N8, N14 0.25%  |
| 22.8  | 1934.8210 | -0.0002 | <a href="#">DIDECLQNGRICNNGR</a> | Deamidated N8, N13 0.25%  |

Mascot: <http://www.matrixscience.com/>

# Mascot Search Results

## Peptide View

MS/MS Fragmentation of **DIDECLQNGRICNNGR**

Found in **P35555** in **uni\_human\_nr**, FBN1\_HUMAN Fibrillin-1 OS=Homo sapiens GN=FBN1 PE=1 SV=3

Match to Query 7751: 1933.836522 from(645.619450,3+) intensity(19200392.0000) rtinseconds(1601) scans(8005) index(5523)

Title: 130809\_HPL\_Human\_Plaque\_BR2\_TR3\_17\_Spectrum025520\_scans\_8005\_RTINSECONDS=1601

Data file E:\RAW\HumanPlaques\mgf\T\1D\T130809\_HPL\_Human\_Plaque\_BR2\_TR3\_17.mgf

Click mouse within plot area to zoom in by factor of two about that point

Or,  to  Da

Label all possible matches  Label matches used for scoring

Show Y-axis

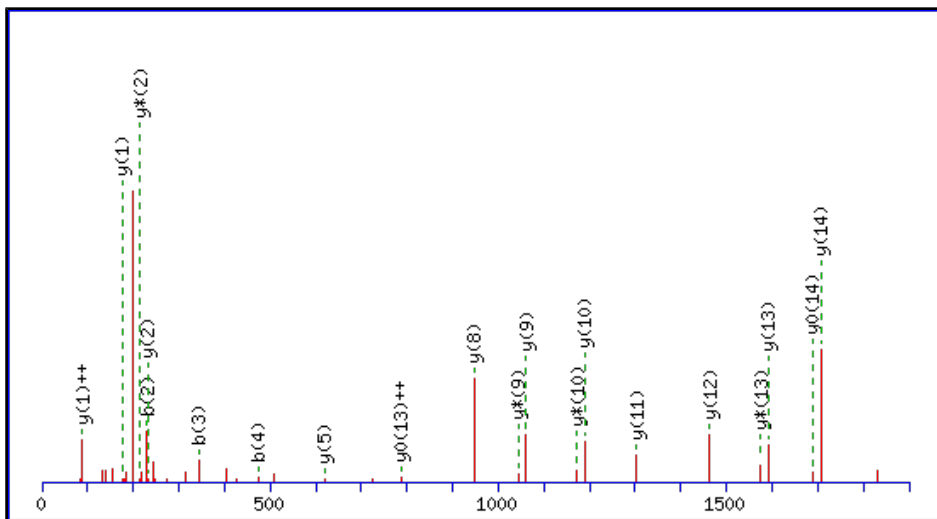

**Monoisotopic mass of neutral peptide Mr(calc):** 1933.8370

**Fixed modifications:** Carbamidomethyl (C) (apply to specified residues or termini only)

**Variable modifications:**

**N8** : Deamidated (NQ)

**Ions Score:** 60 **Expect:** 2.4e-005

**Matches** : 20/144 fragment ions using 38 most intense peaks ([help](#))

| #  | b               | b <sup>++</sup> | b <sup>*</sup> | b <sup>*++</sup> | b <sup>0</sup> | b <sup>0++</sup> | Seq. | y                | y <sup>++</sup> | y <sup>*</sup>   | y <sup>*++</sup> | y <sup>0</sup>   | y <sup>0++</sup> | #  |
|----|-----------------|-----------------|----------------|------------------|----------------|------------------|------|------------------|-----------------|------------------|------------------|------------------|------------------|----|
| 1  | 116.0342        | 58.5207         |                |                  | 98.0237        | 49.5155          | D    |                  |                 |                  |                  |                  |                  | 16 |
| 2  | <b>229.1183</b> | 115.0628        |                |                  | 211.1077       | 106.0575         | I    | 1819.8174        | 910.4123        | 1802.7908        | 901.8991         | 1801.8068        | 901.4071         | 15 |
| 3  | <b>344.1452</b> | 172.5763        |                |                  | 326.1347       | 163.5710         | D    | <b>1706.7333</b> | 853.8703        | 1689.7068        | 845.3570         | <b>1688.7228</b> | 844.8650         | 14 |
| 4  | <b>473.1878</b> | 237.0975        |                |                  | 455.1773       | 228.0923         | E    | <b>1591.7064</b> | 796.3568        | <b>1574.6798</b> | 787.8436         | 1573.6958        | <b>787.3515</b>  | 13 |
| 5  | 633.2185        | 317.1129        |                |                  | 615.2079       | 308.1076         | C    | <b>1462.6638</b> | 731.8355        | 1445.6372        | 723.3223         |                  |                  | 12 |
| 6  | 746.3025        | 373.6549        |                |                  | 728.2920       | 364.6496         | L    | <b>1302.6331</b> | 651.8202        | 1285.6066        | 643.3069         |                  |                  | 11 |
| 7  | 874.3611        | 437.6842        | 857.3346       | 429.1709         | 856.3505       | 428.6789         | Q    | <b>1189.5491</b> | 595.2782        | <b>1172.5225</b> | 586.7649         |                  |                  | 10 |
| 8  | 989.3881        | 495.1977        | 972.3615       | 486.6844         | 971.3775       | 486.1924         | N    | <b>1061.4905</b> | 531.2489        | <b>1044.4640</b> | 522.7356         |                  |                  | 9  |
| 9  | 1046.4095       | 523.7084        | 1029.3830      | 515.1951         | 1028.3990      | 514.7031         | G    | <b>946.4636</b>  | 473.7354        | 929.4370         | 465.2221         |                  |                  | 8  |
| 10 | 1202.5106       | 601.7590        | 1185.4841      | 593.2457         | 1184.5001      | 592.7537         | R    | 889.4421         | 445.2247        | 872.4155         | 436.7114         |                  |                  | 7  |
| 11 | 1315.5947       | 658.3010        | 1298.5681      | 649.7877         | 1297.5841      | 649.2957         | I    | 733.3410         | 367.1741        | 716.3144         | 358.6609         |                  |                  | 6  |
| 12 | 1475.6253       | 738.3163        | 1458.5988      | 729.8030         | 1457.6148      | 729.3110         | C    | <b>620.2569</b>  | 310.6321        | 603.2304         | 302.1188         |                  |                  | 5  |
| 13 | 1589.6683       | 795.3378        | 1572.6417      | 786.8245         | 1571.6577      | 786.3325         | N    | 460.2263         | 230.6168        | 443.1997         | 222.1035         |                  |                  | 4  |
| 14 | 1703.7112       | 852.3592        | 1686.6846      | 843.8460         | 1685.7006      | 843.3540         | N    | 346.1833         | 173.5953        | 329.1568         | 165.0820         |                  |                  | 3  |
| 15 | 1760.7327       | 880.8700        | 1743.7061      | 872.3567         | 1742.7221      | 871.8647         | G    | <b>232.1404</b>  | 116.5738        | <b>215.1139</b>  | 108.0606         |                  |                  | 2  |

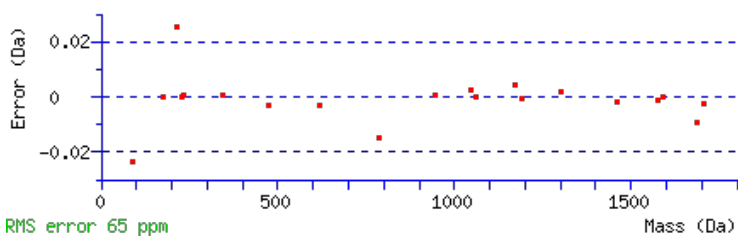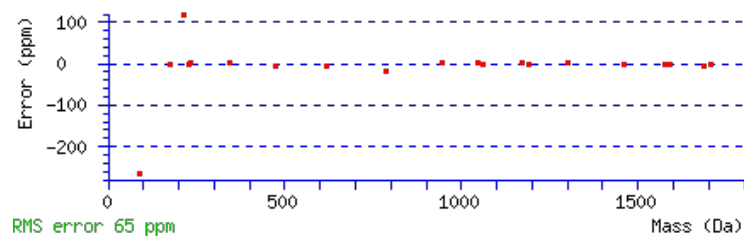

NCBI BLAST search of [DIDECLQNGRICNNGR](#)

(Parameters: blastp, nr protein database, expect=20000, no filter, PAM30)

Other BLAST [web gateways](#)

All matches to this query

| Score | Mr(calc)  | Delta   | Sequence                          | Site Analysis        |
|-------|-----------|---------|-----------------------------------|----------------------|
| 60.4  | 1933.8370 | -0.0005 | <a href="#">DIDECLQNGRICNNGR</a>  | Deamidated N8 92.79% |
| 48.8  | 1933.8370 | -0.0005 | <a href="#">DIDECLQNGRICNNGR</a>  | Deamidated Q7 6.42%  |
| 36.7  | 1933.8370 | -0.0005 | <a href="#">DIDECLQNGRICNNGR</a>  | Deamidated N14 0.39% |
| 36.7  | 1933.8370 | -0.0005 | <a href="#">DIDECLQNGRICNNGR</a>  | Deamidated N13 0.39% |
| 1.7   | 1932.8272 | 1.0093  | <a href="#">VQAMKSPDHNGEDNEAR</a> |                      |
| 0.4   | 1932.8247 | 1.0119  | <a href="#">RENMYYSQSSMEFPHR</a>  |                      |

Mascot: <http://www.matrixscience.com/>

# Mascot Search Results

## Peptide View

MS/MS Fragmentation of **DIDECLQNGRICNNGR**

Found in **P35555** in **uni\_human\_nr**, FBN1\_HUMAN Fibrillin-1 OS=Homo sapiens GN=FBN1 PE=1 SV=3

Match to Query 7270: 1933.835668 from(967.925110,2+) intensity(3232391.5000) rtinseconds(1595) scans(8053) index(5691)

Title: 130806\_HPL\_Human\_Plaque\_BR1\_TR2\_17\_Spectrum026177\_scans\_8053\_RTINSECONDS=1595

Data file E:\RAW\HumanPlaques\mgf\T\1D\T130806\_HPL\_Human\_Plaque\_BR1\_TR2\_17.mgf

Click mouse within plot area to zoom in by factor of two about that point

Or,  to  Da

Label all possible matches  Label matches used for scoring

Show Y-axis

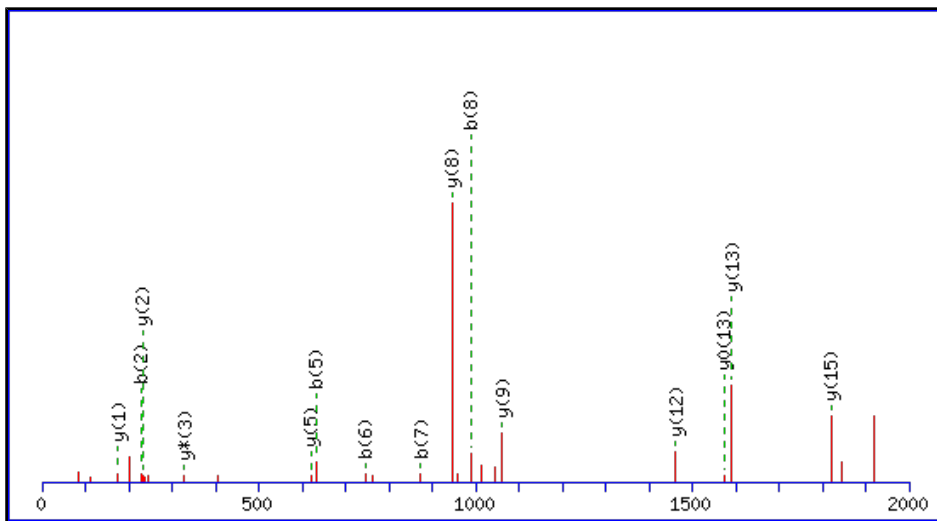

**Monoisotopic mass of neutral peptide Mr(calc):** 1933.8370

**Fixed modifications:** Carbamidomethyl (C) (apply to specified residues or termini only)

**Variable modifications:**

N8 : Deamidated (NQ)

**Ions Score:** 58 **Expect:** 3.7e-005

**Matches :** 15/144 fragment ions using 27 most intense peaks ([help](#))

| #  | b               | b <sup>++</sup> | b <sup>*</sup> | b <sup>*++</sup> | b <sup>0</sup> | b <sup>0++</sup> | Seq. | y                | y <sup>++</sup> | y <sup>*</sup>  | y <sup>*++</sup> | y <sup>0</sup>   | y <sup>0++</sup> | #  |
|----|-----------------|-----------------|----------------|------------------|----------------|------------------|------|------------------|-----------------|-----------------|------------------|------------------|------------------|----|
| 1  | 116.0342        | 58.5207         |                |                  | 98.0237        | 49.5155          | D    |                  |                 |                 |                  |                  |                  | 16 |
| 2  | <b>229.1183</b> | 115.0628        |                |                  | 211.1077       | 106.0575         | I    | <b>1819.8174</b> | 910.4123        | 1802.7908       | 901.8991         | 1801.8068        | 901.4071         | 15 |
| 3  | 344.1452        | 172.5763        |                |                  | 326.1347       | 163.5710         | D    | 1706.7333        | 853.8703        | 1689.7068       | 845.3570         | 1688.7228        | 844.8650         | 14 |
| 4  | 473.1878        | 237.0975        |                |                  | 455.1773       | 228.0923         | E    | <b>1591.7064</b> | 796.3568        | 1574.6798       | 787.8436         | <b>1573.6958</b> | 787.3515         | 13 |
| 5  | <b>633.2185</b> | 317.1129        |                |                  | 615.2079       | 308.1076         | C    | <b>1462.6638</b> | 731.8355        | 1445.6372       | 723.3223         |                  |                  | 12 |
| 6  | <b>746.3025</b> | 373.6549        |                |                  | 728.2920       | 364.6496         | L    | 1302.6331        | 651.8202        | 1285.6066       | 643.3069         |                  |                  | 11 |
| 7  | <b>874.3611</b> | 437.6842        | 857.3346       | 429.1709         | 856.3505       | 428.6789         | Q    | 1189.5491        | 595.2782        | 1172.5225       | 586.7649         |                  |                  | 10 |
| 8  | <b>989.3881</b> | 495.1977        | 972.3615       | 486.6844         | 971.3775       | 486.1924         | N    | <b>1061.4905</b> | 531.2489        | 1044.4640       | 522.7356         |                  |                  | 9  |
| 9  | 1046.4095       | 523.7084        | 1029.3830      | 515.1951         | 1028.3990      | 514.7031         | G    | <b>946.4636</b>  | 473.7354        | 929.4370        | 465.2221         |                  |                  | 8  |
| 10 | 1202.5106       | 601.7590        | 1185.4841      | 593.2457         | 1184.5001      | 592.7537         | R    | 889.4421         | 445.2247        | 872.4155        | 436.7114         |                  |                  | 7  |
| 11 | 1315.5947       | 658.3010        | 1298.5681      | 649.7877         | 1297.5841      | 649.2957         | I    | 733.3410         | 367.1741        | 716.3144        | 358.6609         |                  |                  | 6  |
| 12 | 1475.6253       | 738.3163        | 1458.5988      | 729.8030         | 1457.6148      | 729.3110         | C    | <b>620.2569</b>  | 310.6321        | 603.2304        | 302.1188         |                  |                  | 5  |
| 13 | 1589.6683       | 795.3378        | 1572.6417      | 786.8245         | 1571.6577      | 786.3325         | N    | 460.2263         | 230.6168        | 443.1997        | 222.1035         |                  |                  | 4  |
| 14 | 1703.7112       | 852.3592        | 1686.6846      | 843.8460         | 1685.7006      | 843.3540         | N    | 346.1833         | 173.5953        | <b>329.1568</b> | 165.0820         |                  |                  | 3  |
| 15 | 1760.7327       | 880.8700        | 1743.7061      | 872.3567         | 1742.7221      | 871.8647         | G    | <b>232.1404</b>  | 116.5738        | 215.1139        | 108.0606         |                  |                  | 2  |

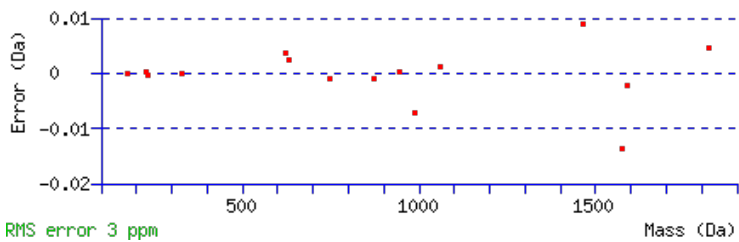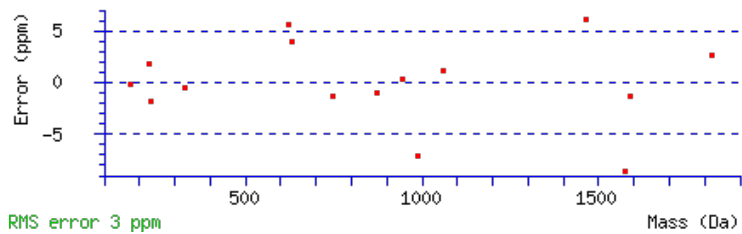

NCBI BLAST search of [DIDECLQNGRICNNGR](#)

(Parameters: blastp, nr protein database, expect=20000, no filter, PAM30)

Other BLAST [web gateways](#)

All matches to this query

| Score | Mr(calc)  | Delta   | Sequence                          | Site Analysis        |
|-------|-----------|---------|-----------------------------------|----------------------|
| 58.5  | 1933.8370 | -0.0014 | <a href="#">DIDECLQNGRICNNGR</a>  | Deamidated N8 96.03% |
| 44.2  | 1933.8370 | -0.0014 | <a href="#">DIDECLQNGRICNNGR</a>  | Deamidated Q7 3.63%  |
| 31.7  | 1933.8370 | -0.0014 | <a href="#">DIDECLQNGRICNNGR</a>  | Deamidated N13 0.20% |
| 30.0  | 1933.8370 | -0.0014 | <a href="#">DIDECLQNGRICNNGR</a>  | Deamidated N14 0.14% |
| 0.7   | 1932.8272 | 1.0085  | <a href="#">VQAMKSPDHNGEDNEAR</a> |                      |
| 0.4   | 1933.8402 | -0.0045 | <a href="#">NDIHLDADDPNSADKHR</a> |                      |

Mascot: <http://www.matrixscience.com/>

# Mascot Search Results

## Peptide View

MS/MS Fragmentation of **DIDECLQNGRICNNGR**

Found in **P35555** in **uni\_human\_nr**, FBN1\_HUMAN Fibrillin-1 OS=Homo sapiens GN=FBN1 PE=1 SV=3

Match to Query 8284: 1933.836882 from(645.619570,3+) intensity(205245.7969) rtinseconds(1599) scans(8107) index(5816)

Title: 130806\_HPL\_Human\_Plaque\_BR1\_TR2\_18\_Spectrum025964\_scans\_8107\_RTINSECONDS=1599

Data file E:\RAW\HumanPlaques\mgf\T\1D\T130806\_HPL\_Human\_Plaque\_BR1\_TR2\_18.mgf

Click mouse within plot area to zoom in by factor of two about that point

Or,  to  Da

Label all possible matches  Label matches used for scoring

Show Y-axis

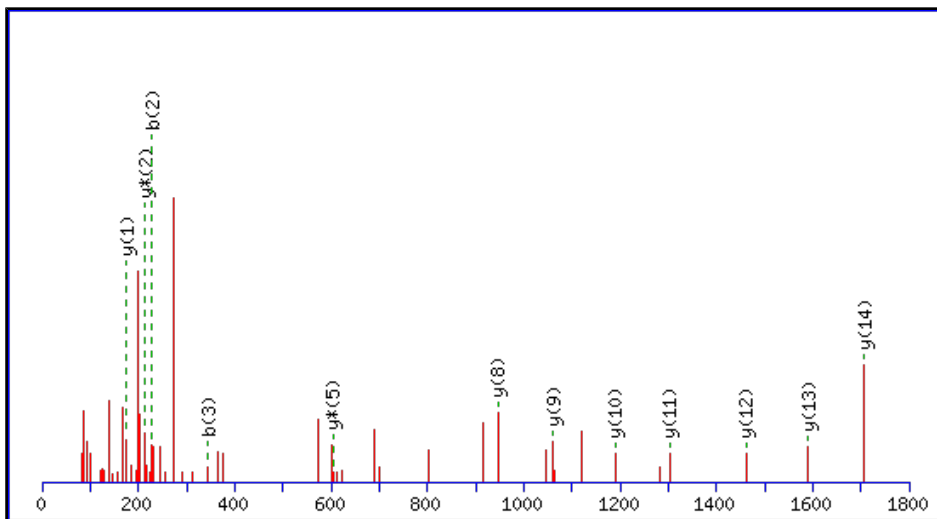

**Monoisotopic mass of neutral peptide Mr(calc):** 1933.8370

**Fixed modifications:** Carbamidomethyl (C) (apply to specified residues or termini only)

**Variable modifications:**

N14 : Deamidated (NQ)

**Ions Score:** 25 **Expect:** 0.08

**Matches :** 12/144 fragment ions using 39 most intense peaks ([help](#))

| #  | b               | b <sup>++</sup> | b <sup>*</sup> | b <sup>*++</sup> | b <sup>0</sup> | b <sup>0++</sup> | Seq. | y                | y <sup>++</sup> | y <sup>*</sup>  | y <sup>*++</sup> | y <sup>0</sup> | y <sup>0++</sup> | #  |
|----|-----------------|-----------------|----------------|------------------|----------------|------------------|------|------------------|-----------------|-----------------|------------------|----------------|------------------|----|
| 1  | 116.0342        | 58.5207         |                |                  | 98.0237        | 49.5155          | D    |                  |                 |                 |                  |                |                  | 16 |
| 2  | <b>229.1183</b> | 115.0628        |                |                  | 211.1077       | 106.0575         | I    | 1819.8174        | 910.4123        | 1802.7908       | 901.8991         | 1801.8068      | 901.4071         | 15 |
| 3  | <b>344.1452</b> | 172.5763        |                |                  | 326.1347       | 163.5710         | D    | <b>1706.7333</b> | 853.8703        | 1689.7068       | 845.3570         | 1688.7228      | 844.8650         | 14 |
| 4  | 473.1878        | 237.0975        |                |                  | 455.1773       | 228.0923         | E    | <b>1591.7064</b> | 796.3568        | 1574.6798       | 787.8436         | 1573.6958      | 787.3515         | 13 |
| 5  | 633.2185        | 317.1129        |                |                  | 615.2079       | 308.1076         | C    | <b>1462.6638</b> | 731.8355        | 1445.6372       | 723.3223         |                |                  | 12 |
| 6  | 746.3025        | 373.6549        |                |                  | 728.2920       | 364.6496         | L    | <b>1302.6331</b> | 651.8202        | 1285.6066       | 643.3069         |                |                  | 11 |
| 7  | 874.3611        | 437.6842        | 857.3346       | 429.1709         | 856.3505       | 428.6789         | Q    | <b>1189.5491</b> | 595.2782        | 1172.5225       | 586.7649         |                |                  | 10 |
| 8  | 988.4040        | 494.7057        | 971.3775       | 486.1924         | 970.3935       | 485.7004         | N    | <b>1061.4905</b> | 531.2489        | 1044.4640       | 522.7356         |                |                  | 9  |
| 9  | 1045.4255       | 523.2164        | 1028.3990      | 514.7031         | 1027.4149      | 514.2111         | G    | <b>947.4476</b>  | 474.2274        | 930.4210        | 465.7142         |                |                  | 8  |
| 10 | 1201.5266       | 601.2669        | 1184.5001      | 592.7537         | 1183.5160      | 592.2617         | R    | 890.4261         | 445.7167        | 873.3996        | 437.2034         |                |                  | 7  |
| 11 | 1314.6107       | 657.8090        | 1297.5841      | 649.2957         | 1296.6001      | 648.8037         | I    | 734.3250         | 367.6661        | 717.2984        | 359.1529         |                |                  | 6  |
| 12 | 1474.6413       | 737.8243        | 1457.6148      | 729.3110         | 1456.6308      | 728.8190         | C    | 621.2409         | 311.1241        | <b>604.2144</b> | 302.6108         |                |                  | 5  |
| 13 | 1588.6843       | 794.8458        | 1571.6577      | 786.3325         | 1570.6737      | 785.8405         | N    | 461.2103         | 231.1088        | 444.1837        | 222.5955         |                |                  | 4  |
| 14 | 1703.7112       | 852.3592        | 1686.6846      | 843.8460         | 1685.7006      | 843.3540         | N    | 347.1674         | 174.0873        | 330.1408        | 165.5740         |                |                  | 3  |
| 15 | 1760.7327       | 880.8700        | 1743.7061      | 872.3567         | 1742.7221      | 871.8647         | G    | 232.1404         | 116.5738        | <b>215.1139</b> | 108.0606         |                |                  | 2  |



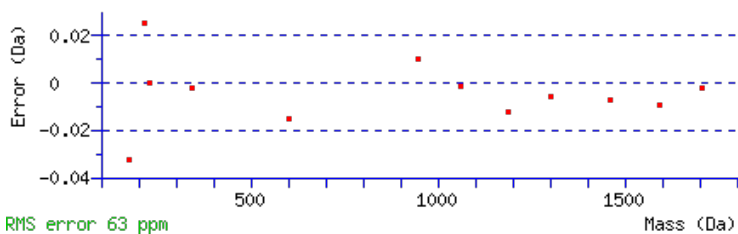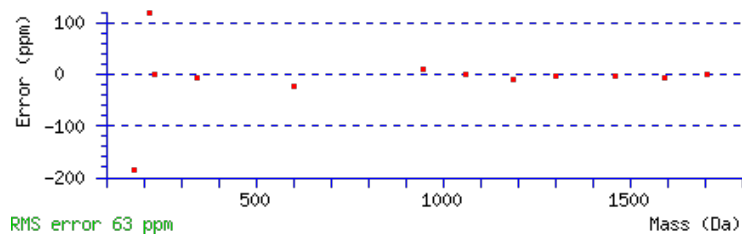

NCBI BLAST search of [DIDECLQNGRICNNGR](#)

(Parameters: blastp, nr protein database, expect=20000, no filter, PAM30)

Other BLAST [web gateways](#)

All matches to this query

| Score | Mr(calc)  | Delta   | Sequence                         |
|-------|-----------|---------|----------------------------------|
| 25.3  | 1933.8370 | -0.0002 | <a href="#">DIDECLQNGRICNNGR</a> |
| 25.3  | 1933.8370 | -0.0002 | <a href="#">DIDECLQNGRICNNGR</a> |
| 24.1  | 1933.8370 | -0.0002 | <a href="#">DIDECLQNGRICNNGR</a> |
| 16.3  | 1933.8370 | -0.0002 | <a href="#">DIDECLQNGRICNNGR</a> |

Mascot: <http://www.matrixscience.com/>

# Mascot Search Results

## Peptide View

MS/MS Fragmentation of **DINECETPGICMNGR**

Found in **P35555** in **uni\_human\_nr**, FBN1\_HUMAN Fibrillin-1 OS=Homo sapiens GN=FBN1 PE=1 SV=3

Match to Query 5929: 1782.679908 from(892.347230,2+) intensity(187371.6406) rtinseconds(1676) scans(8586) index(6357)

Title: 130806\_HPL\_Human\_Plaque\_BR1\_TR2\_20\_Spectrum026225\_scans\_8586\_RTINSECONDS=1676

Data file E:\RAW\HumanPlaques\mgf\T\1D\T130806\_HPL\_Human\_Plaque\_BR1\_TR2\_20.mgf

Click mouse within plot area to zoom in by factor of two about that point

Or,  to  Da

Label all possible matches  Label matches used for scoring

Show Y-axis

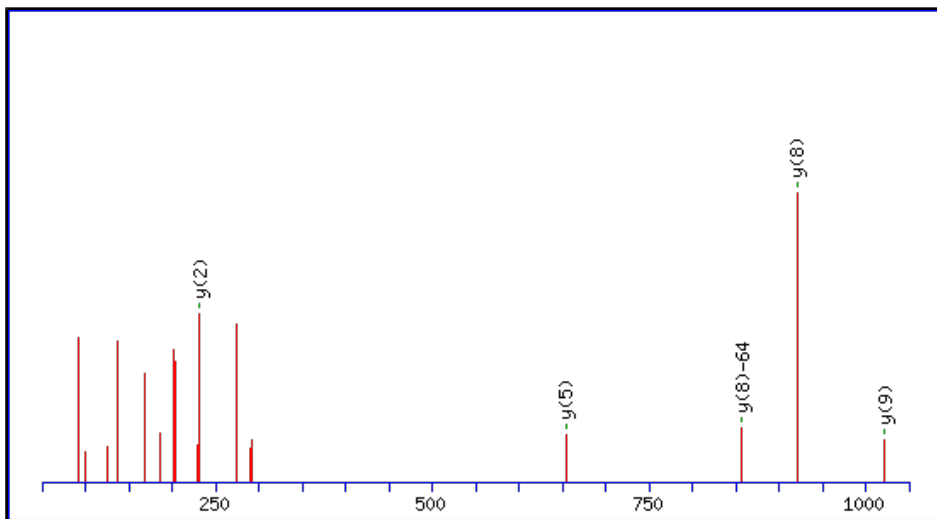

Monoisotopic mass of neutral peptide **Mr(calc):** 1782.6859

**Fixed modifications:** Carbamidomethyl (C) (apply to specified residues or termini only)

**Variable modifications:**

**N3** : Deamidated (NQ)

**M12** : Oxidation (M), with neutral losses 0.0000(shown in table), 63.9983

**N13** : Deamidated (NQ)

**Ions Score:** 28 **Expect:** 0.005

**Matches** : 5/222 fragment ions using 6 most intense peaks ([help](#))

| #  | b         | b <sup>++</sup> | b*        | b <sup>***</sup> | b <sup>0</sup> | b <sup>0++</sup> | Seq. | y                | y <sup>++</sup> | y*        | y <sup>***</sup> | y <sup>0</sup> | y <sup>0++</sup> | #  |
|----|-----------|-----------------|-----------|------------------|----------------|------------------|------|------------------|-----------------|-----------|------------------|----------------|------------------|----|
| 1  | 116.0342  | 58.5207         |           |                  | 98.0237        | 49.5155          | D    |                  |                 |           |                  |                |                  | 15 |
| 2  | 229.1183  | 115.0628        |           |                  | 211.1077       | 106.0575         | I    | 1668.6662        | 834.8367        | 1651.6397 | 826.3235         | 1650.6557      | 825.8315         | 14 |
| 3  | 344.1452  | 172.5763        | 327.1187  | 164.0630         | 326.1347       | 163.5710         | N    | 1555.5822        | 778.2947        | 1538.5556 | 769.7814         | 1537.5716      | 769.2894         | 13 |
| 4  | 473.1878  | 237.0975        | 456.1613  | 228.5843         | 455.1773       | 228.0923         | E    | 1440.5552        | 720.7812        | 1423.5287 | 712.2680         | 1422.5446      | 711.7760         | 12 |
| 5  | 633.2185  | 317.1129        | 616.1919  | 308.5996         | 615.2079       | 308.1076         | C    | 1311.5126        | 656.2599        | 1294.4861 | 647.7467         | 1293.5021      | 647.2547         | 11 |
| 6  | 762.2611  | 381.6342        | 745.2345  | 373.1209         | 744.2505       | 372.6289         | E    | 1151.4820        | 576.2446        | 1134.4554 | 567.7313         | 1133.4714      | 567.2393         | 10 |
| 7  | 863.3087  | 432.1580        | 846.2822  | 423.6447         | 845.2982       | 423.1527         | T    | <b>1022.4394</b> | 511.7233        | 1005.4128 | 503.2101         | 1004.4288      | 502.7180         | 9  |
| 8  | 960.3615  | 480.6844        | 943.3350  | 472.1711         | 942.3509       | 471.6791         | P    | <b>921.3917</b>  | 461.1995        | 904.3652  | 452.6862         |                |                  | 8  |
| 9  | 1017.3830 | 509.1951        | 1000.3564 | 500.6818         | 999.3724       | 500.1898         | G    | 824.3389         | 412.6731        | 807.3124  | 404.1598         |                |                  | 7  |
| 10 | 1130.4670 | 565.7372        | 1113.4405 | 557.2239         | 1112.4565      | 556.7319         | I    | 767.3175         | 384.1624        | 750.2909  | 375.6491         |                |                  | 6  |
| 11 | 1290.4977 | 645.7525        | 1273.4711 | 637.2392         | 1272.4871      | 636.7472         | C    | <b>654.2334</b>  | 327.6203        | 637.2069  | 319.1071         |                |                  | 5  |
| 12 | 1437.5331 | 719.2702        | 1420.5065 | 710.7569         | 1419.5225      | 710.2649         | M    | 494.2028         | 247.6050        | 477.1762  | 239.0917         |                |                  | 4  |
| 13 | 1552.5600 | 776.7837        | 1535.5335 | 768.2704         | 1534.5495      | 767.7784         | N    | 347.1674         | 174.0873        | 330.1408  | 165.5740         |                |                  | 3  |
| 14 | 1609.5815 | 805.2944        | 1592.5549 | 796.7811         | 1591.5709      | 796.2891         | G    | <b>232.1404</b>  | 116.5738        | 215.1139  | 108.0606         |                |                  | 2  |

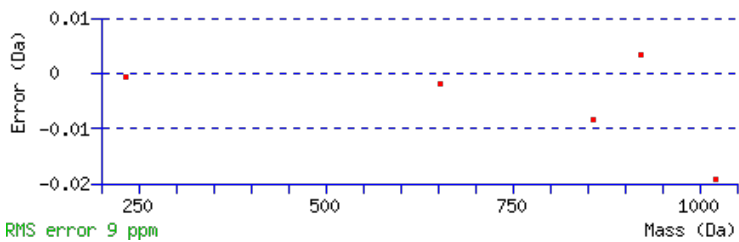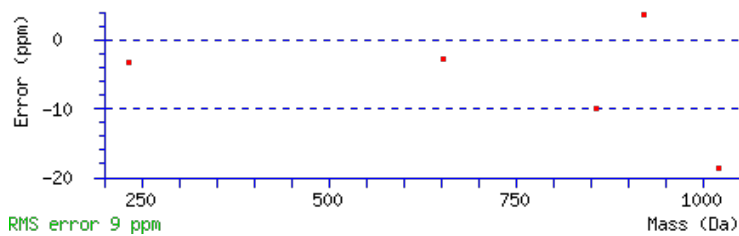

NCBI BLAST search of [DINECETPGICMNGR](#)

(Parameters: blastp, nr protein database, expect=20000, no filter, PAM30)

Other BLAST [web gateways](#)

All matches to this query

| Score | Mr(calc)  | Delta   | Sequence                        |
|-------|-----------|---------|---------------------------------|
| 27.6  | 1782.6859 | -0.0060 | <a href="#">DINECETPGICMNGR</a> |

Mascot: <http://www.matrixscience.com/>

# Mascot Search Results

## Peptide View

MS/MS Fragmentation of **DINECETPGICMNGR**

Found in **P35555** in **uni\_human\_nr**, FBN1\_HUMAN Fibrillin-1 OS=Homo sapiens GN=FBN1 PE=1 SV=3

Match to Query 5049: 1781.700168 from(891.857360,2+) intensity(2438321.2500) rtinseconds(1589) scans(7800) index(5576)

Title: 130801\_HPL\_Human\_Plaque\_BR1\_TR1\_20\_Spectrum024711\_scans\_7800\_RTINSECONDS=1589

Data file E:\RAW\HumanPlaques\mgf\T\1D\T130801\_HPL\_Human\_Plaque\_BR1\_TR1\_20.mgf

Click mouse within plot area to zoom in by factor of two about that point

Or,  to  Da

Label all possible matches  Label matches used for scoring

Show Y-axis

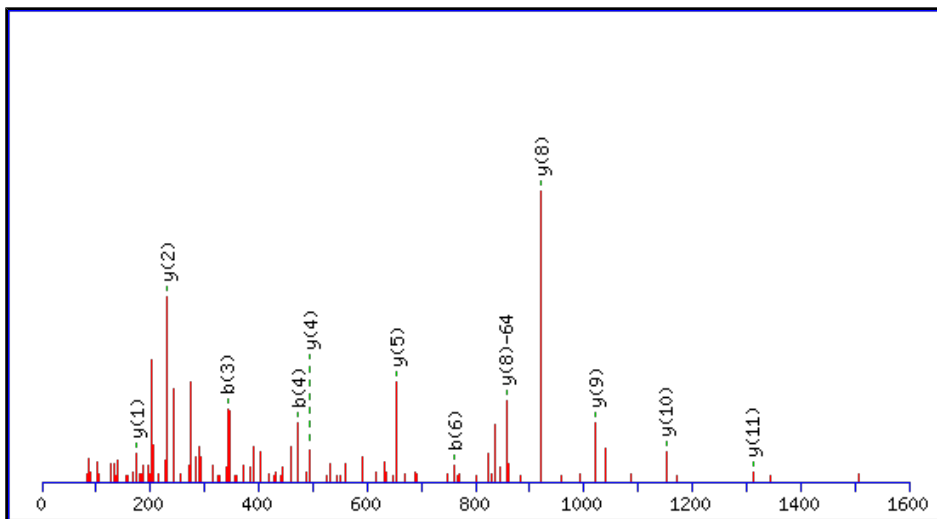

Monoisotopic mass of neutral peptide **Mr(calc):** 1781.7019

**Fixed modifications:** Carbamidomethyl (C) (apply to specified residues or termini only)

**Variable modifications:**

**M12** : Oxidation (M), with neutral losses 0.0000(shown in table), 63.9983

**N13** : Deamidated (NQ)

**Ions Score:** 73 **Expect:** 1.9e-007

**Matches** : 12/222 fragment ions using 13 most intense peaks ([help](#))

| #  | b               | b <sup>++</sup> | b <sup>*</sup> | b <sup>*++</sup> | b <sup>0</sup> | b <sup>0++</sup> | Seq. | y                | y <sup>++</sup> | y <sup>*</sup> | y <sup>*++</sup> | y <sup>0</sup> | y <sup>0++</sup> | #  |
|----|-----------------|-----------------|----------------|------------------|----------------|------------------|------|------------------|-----------------|----------------|------------------|----------------|------------------|----|
| 1  | 116.0342        | 58.5207         |                |                  | 98.0237        | 49.5155          | D    |                  |                 |                |                  |                |                  | 15 |
| 2  | 229.1183        | 115.0628        |                |                  | 211.1077       | 106.0575         | I    | 1667.6822        | 834.3447        | 1650.6557      | 825.8315         | 1649.6716      | 825.3395         | 14 |
| 3  | <b>343.1612</b> | 172.0842        | 326.1347       | 163.5710         | 325.1506       | 163.0790         | N    | 1554.5981        | 777.8027        | 1537.5716      | 769.2894         | 1536.5876      | 768.7974         | 13 |
| 4  | <b>472.2038</b> | 236.6055        | 455.1773       | 228.0923         | 454.1932       | 227.6003         | E    | 1440.5552        | 720.7812        | 1423.5287      | 712.2680         | 1422.5446      | 711.7760         | 12 |
| 5  | 632.2345        | 316.6209        | 615.2079       | 308.1076         | 614.2239       | 307.6156         | C    | <b>1311.5126</b> | 656.2599        | 1294.4861      | 647.7467         | 1293.5021      | 647.2547         | 11 |
| 6  | <b>761.2770</b> | 381.1422        | 744.2505       | 372.6289         | 743.2665       | 372.1369         | E    | <b>1151.4820</b> | 576.2446        | 1134.4554      | 567.7313         | 1133.4714      | 567.2393         | 10 |
| 7  | 862.3247        | 431.6660        | 845.2982       | 423.1527         | 844.3142       | 422.6607         | T    | <b>1022.4394</b> | 511.7233        | 1005.4128      | 503.2101         | 1004.4288      | 502.7180         | 9  |
| 8  | 959.3775        | 480.1924        | 942.3509       | 471.6791         | 941.3669       | 471.1871         | P    | <b>921.3917</b>  | 461.1995        | 904.3652       | 452.6862         |                |                  | 8  |
| 9  | 1016.3990       | 508.7031        | 999.3724       | 500.1898         | 998.3884       | 499.6978         | G    | 824.3389         | 412.6731        | 807.3124       | 404.1598         |                |                  | 7  |
| 10 | 1129.4830       | 565.2451        | 1112.4565      | 556.7319         | 1111.4725      | 556.2399         | I    | 767.3175         | 384.1624        | 750.2909       | 375.6491         |                |                  | 6  |
| 11 | 1289.5137       | 645.2605        | 1272.4871      | 636.7472         | 1271.5031      | 636.2552         | C    | <b>654.2334</b>  | 327.6203        | 637.2069       | 319.1071         |                |                  | 5  |
| 12 | 1436.5491       | 718.7782        | 1419.5225      | 710.2649         | 1418.5385      | 709.7729         | M    | <b>494.2028</b>  | 247.6050        | 477.1762       | 239.0917         |                |                  | 4  |
| 13 | 1551.5760       | 776.2916        | 1534.5495      | 767.7784         | 1533.5654      | 767.2864         | N    | 347.1674         | 174.0873        | 330.1408       | 165.5740         |                |                  | 3  |
| 14 | 1608.5975       | 804.8024        | 1591.5709      | 796.2891         | 1590.5869      | 795.7971         | G    | <b>232.1404</b>  | 116.5738        | 215.1139       | 108.0606         |                |                  | 2  |
| 15 |                 |                 |                |                  |                |                  | R    | <b>175.1190</b>  | 88.0631         | 158.0924       | 79.5498          |                |                  | 1  |

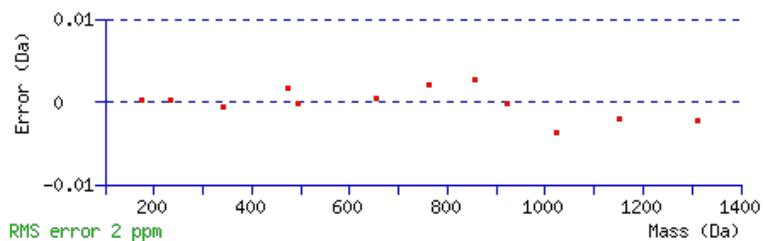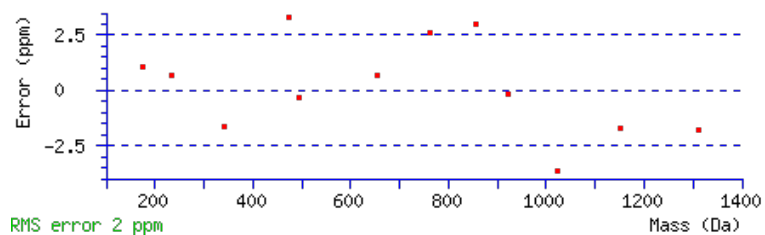

NCBI **BLAST** search of [DINECETPGICMNGR](#)

(Parameters: blastp, nr protein database, expect=20000, no filter, PAM30)

Other BLAST [web gateways](#)

**All matches to this query**

| Score | Mr(calc)  | Delta   | Sequence                        |
|-------|-----------|---------|---------------------------------|
| 73.3  | 1781.7019 | -0.0017 | <a href="#">DINECETPGICMNGR</a> |

Mascot: <http://www.matrixscience.com/>

# Mascot Search Results

## Peptide View

MS/MS Fragmentation of **DINECETPGICMNGR**

Found in **P35555** in **uni\_human\_nr**, FBN1\_HUMAN Fibrillin-1 OS=Homo sapiens GN=FBN1 PE=1 SV=3

Match to Query 5506: 1780.716888 from(891.365720,2+) intensity(984349.7500) rtinseconds(1513) scans(7226) index(4836)

Title: 130806\_HPL\_Human\_Plaque\_BR1\_TR2\_15\_Spectrum025167\_scans\_7226\_RTINSECONDS=1513

Data file E:\RAW\HumanPlaques\mgf\T\1D\T130806\_HPL\_Human\_Plaque\_BR1\_TR2\_15.mgf

Click mouse within plot area to zoom in by factor of two about that point

Or,  to  Da

Label all possible matches  Label matches used for scoring

Show Y-axis

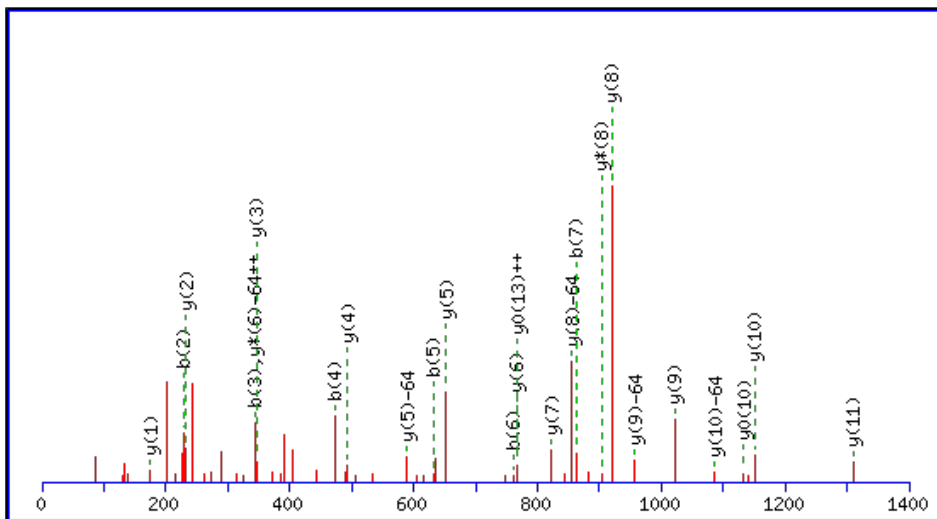

**Monoisotopic mass of neutral peptide Mr(calc):** 1780.7179

**Fixed modifications:** Carbamidomethyl (C) (apply to specified residues or termini only)

**Variable modifications:**

**M12** : Oxidation (M), with neutral losses 0.0000(shown in table), 63.9983

**Ions Score:** 75 **Expect:** 2.8e-007

**Matches** : 25/222 fragment ions using 42 most intense peaks ([help](#))

| #  | b               | b <sup>++</sup> | b <sup>*</sup> | b <sup>*++</sup> | b <sup>0</sup> | b <sup>0++</sup> | Seq. | y                | y <sup>++</sup> | y <sup>*</sup>  | y <sup>*++</sup> | y <sup>0</sup>   | y <sup>0++</sup> | #  |
|----|-----------------|-----------------|----------------|------------------|----------------|------------------|------|------------------|-----------------|-----------------|------------------|------------------|------------------|----|
| 1  | 116.0342        | 58.5207         |                |                  | 98.0237        | 49.5155          | D    |                  |                 |                 |                  |                  |                  | 15 |
| 2  | <b>229.1183</b> | 115.0628        |                |                  | 211.1077       | 106.0575         | I    | 1666.6982        | 833.8527        | 1649.6716       | 825.3395         | 1648.6876        | 824.8474         | 14 |
| 3  | <b>343.1612</b> | 172.0842        | 326.1347       | 163.5710         | 325.1506       | 163.0790         | N    | 1553.6141        | 777.3107        | 1536.5876       | 768.7974         | 1535.6036        | <b>768.3054</b>  | 13 |
| 4  | <b>472.2038</b> | 236.6055        | 455.1773       | 228.0923         | 454.1932       | 227.6003         | E    | 1439.5712        | 720.2892        | 1422.5446       | 711.7760         | 1421.5606        | 711.2840         | 12 |
| 5  | <b>632.2345</b> | 316.6209        | 615.2079       | 308.1076         | 614.2239       | 307.6156         | C    | <b>1310.5286</b> | 655.7679        | 1293.5021       | 647.2547         | 1292.5180        | 646.7627         | 11 |
| 6  | <b>761.2770</b> | 381.1422        | 744.2505       | 372.6289         | 743.2665       | 372.1369         | E    | <b>1150.4980</b> | 575.7526        | 1133.4714       | 567.2393         | <b>1132.4874</b> | 566.7473         | 10 |
| 7  | <b>862.3247</b> | 431.6660        | 845.2982       | 423.1527         | 844.3142       | 422.6607         | T    | <b>1021.4554</b> | 511.2313        | 1004.4288       | 502.7180         | 1003.4448        | 502.2260         | 9  |
| 8  | 959.3775        | 480.1924        | 942.3509       | 471.6791         | 941.3669       | 471.1871         | P    | <b>920.4077</b>  | 460.7075        | <b>903.3811</b> | 452.1942         |                  |                  | 8  |
| 9  | 1016.3990       | 508.7031        | 999.3724       | 500.1898         | 998.3884       | 499.6978         | G    | <b>823.3549</b>  | 412.1811        | 806.3284        | 403.6678         |                  |                  | 7  |
| 10 | 1129.4830       | 565.2451        | 1112.4565      | 556.7319         | 1111.4725      | 556.2399         | I    | <b>766.3335</b>  | 383.6704        | 749.3069        | 375.1571         |                  |                  | 6  |
| 11 | 1289.5137       | 645.2605        | 1272.4871      | 636.7472         | 1271.5031      | 636.2552         | C    | <b>653.2494</b>  | 327.1283        | 636.2228        | 318.6151         |                  |                  | 5  |
| 12 | 1436.5491       | 718.7782        | 1419.5225      | 710.2649         | 1418.5385      | 709.7729         | M    | <b>493.2187</b>  | 247.1130        | 476.1922        | 238.5997         |                  |                  | 4  |
| 13 | 1550.5920       | 775.7996        | 1533.5654      | 767.2864         | 1532.5814      | 766.7944         | N    | <b>346.1833</b>  | 173.5953        | 329.1568        | 165.0820         |                  |                  | 3  |
| 14 | 1607.6135       | 804.3104        | 1590.5869      | 795.7971         | 1589.6029      | 795.3051         | G    | <b>232.1404</b>  | 116.5738        | 215.1139        | 108.0606         |                  |                  | 2  |
| 15 |                 |                 |                |                  |                |                  | R    | <b>175.1190</b>  | 88.0631         | 158.0924        | 79.5498          |                  |                  | 1  |

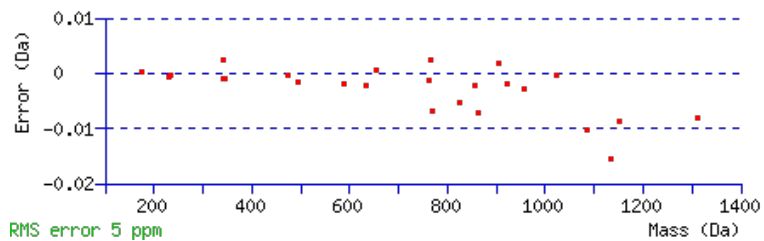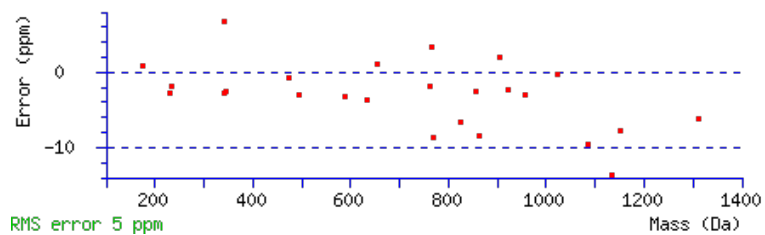

NCBI **BLAST** search of [DINECETPGICMNGR](#)

(Parameters: blastp, nr protein database, expect=20000, no filter, PAM30)

Other BLAST [web gateways](#)

**All matches to this query**

| Score | Mr(calc)  | Delta   | Sequence                        |
|-------|-----------|---------|---------------------------------|
| 74.8  | 1780.7179 | -0.0010 | <a href="#">DINECETPGICMNGR</a> |

Mascot: <http://www.matrixscience.com/>

# Mascot Search Results

## Peptide View

MS/MS Fragmentation of **DINECETPGICMNGR**

Found in **P35555** in **uni\_human\_nr**, FBN1\_HUMAN Fibrillin-1 OS=Homo sapiens GN=FBN1 PE=1 SV=3

Match to Query 5706: 1780.717122 from(594.579650,3+) intensity(619573.0625) rtinseconds(1506) scans(7268) index(4872)

Title: 130809\_HPL\_Human\_Plaque\_BR2\_TR3\_16\_Spectrum024459\_scans\_7268\_RTINSECONDS=1506

Data file E:\RAW\HumanPlaques\mgf\T\1D\T130809\_HPL\_Human\_Plaque\_BR2\_TR3\_16.mgf

Click mouse within plot area to zoom in by factor of two about that point

Or,  to  Da

Label all possible matches  Label matches used for scoring

Show Y-axis

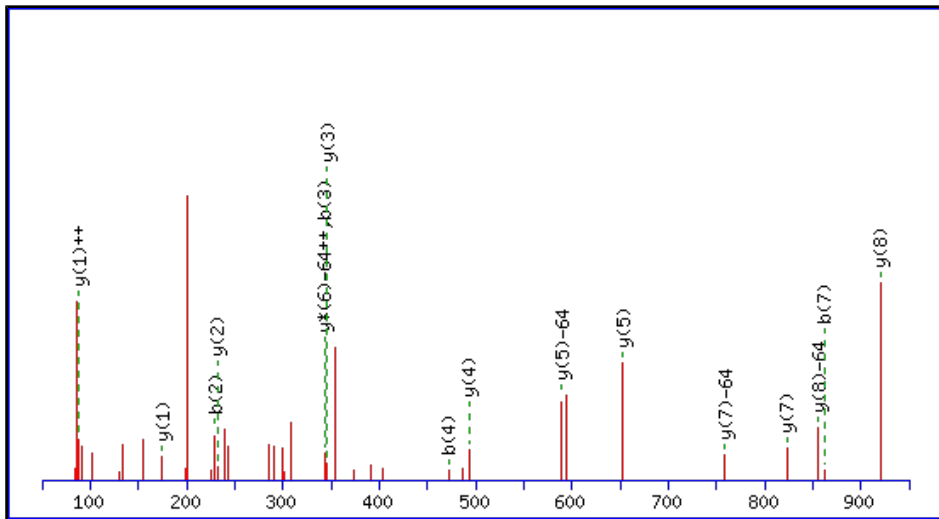

**Monoisotopic mass of neutral peptide Mr(calc):** 1780.7179

**Fixed modifications:** Carbamidomethyl (C) (apply to specified residues or termini only)

**Variable modifications:**

**M12** : Oxidation (M), with neutral losses 0.0000(shown in table), 63.9983

**Ions Score:** 34 **Expect:** 0.0033

**Matches** : 16/222 fragment ions using 37 most intense peaks ([help](#))

| #  | b               | b <sup>++</sup> | b <sup>*</sup> | b <sup>*++</sup> | b <sup>0</sup> | b <sup>0++</sup> | Seq. | y               | y <sup>++</sup> | y <sup>*</sup> | y <sup>*++</sup> | y <sup>0</sup> | y <sup>0++</sup> | #  |
|----|-----------------|-----------------|----------------|------------------|----------------|------------------|------|-----------------|-----------------|----------------|------------------|----------------|------------------|----|
| 1  | 116.0342        | 58.5207         |                |                  | 98.0237        | 49.5155          | D    |                 |                 |                |                  |                |                  | 15 |
| 2  | <b>229.1183</b> | 115.0628        |                |                  | 211.1077       | 106.0575         | I    | 1666.6982       | 833.8527        | 1649.6716      | 825.3395         | 1648.6876      | 824.8474         | 14 |
| 3  | <b>343.1612</b> | 172.0842        | 326.1347       | 163.5710         | 325.1506       | 163.0790         | N    | 1553.6141       | 777.3107        | 1536.5876      | 768.7974         | 1535.6036      | 768.3054         | 13 |
| 4  | <b>472.2038</b> | 236.6055        | 455.1773       | 228.0923         | 454.1932       | 227.6003         | E    | 1439.5712       | 720.2892        | 1422.5446      | 711.7760         | 1421.5606      | 711.2840         | 12 |
| 5  | 632.2345        | 316.6209        | 615.2079       | 308.1076         | 614.2239       | 307.6156         | C    | 1310.5286       | 655.7679        | 1293.5021      | 647.2547         | 1292.5180      | 646.7627         | 11 |
| 6  | 761.2770        | 381.1422        | 744.2505       | 372.6289         | 743.2665       | 372.1369         | E    | 1150.4980       | 575.7526        | 1133.4714      | 567.2393         | 1132.4874      | 566.7473         | 10 |
| 7  | <b>862.3247</b> | 431.6660        | 845.2982       | 423.1527         | 844.3142       | 422.6607         | T    | 1021.4554       | 511.2313        | 1004.4288      | 502.7180         | 1003.4448      | 502.2260         | 9  |
| 8  | 959.3775        | 480.1924        | 942.3509       | 471.6791         | 941.3669       | 471.1871         | P    | <b>920.4077</b> | 460.7075        | 903.3811       | 452.1942         |                |                  | 8  |
| 9  | 1016.3990       | 508.7031        | 999.3724       | 500.1898         | 998.3884       | 499.6978         | G    | <b>823.3549</b> | 412.1811        | 806.3284       | 403.6678         |                |                  | 7  |
| 10 | 1129.4830       | 565.2451        | 1112.4565      | 556.7319         | 1111.4725      | 556.2399         | I    | 766.3335        | 383.6704        | 749.3069       | 375.1571         |                |                  | 6  |
| 11 | 1289.5137       | 645.2605        | 1272.4871      | 636.7472         | 1271.5031      | 636.2552         | C    | <b>653.2494</b> | 327.1283        | 636.2228       | 318.6151         |                |                  | 5  |
| 12 | 1436.5491       | 718.7782        | 1419.5225      | 710.2649         | 1418.5385      | 709.7729         | M    | <b>493.2187</b> | 247.1130        | 476.1922       | 238.5997         |                |                  | 4  |
| 13 | 1550.5920       | 775.7996        | 1533.5654      | 767.2864         | 1532.5814      | 766.7944         | N    | <b>346.1833</b> | 173.5953        | 329.1568       | 165.0820         |                |                  | 3  |
| 14 | 1607.6135       | 804.3104        | 1590.5869      | 795.7971         | 1589.6029      | 795.3051         | G    | <b>232.1404</b> | 116.5738        | 215.1139       | 108.0606         |                |                  | 2  |
| 15 |                 |                 |                |                  |                |                  | R    | <b>175.1190</b> | <b>88.0631</b>  | 158.0924       | 79.5498          |                |                  | 1  |



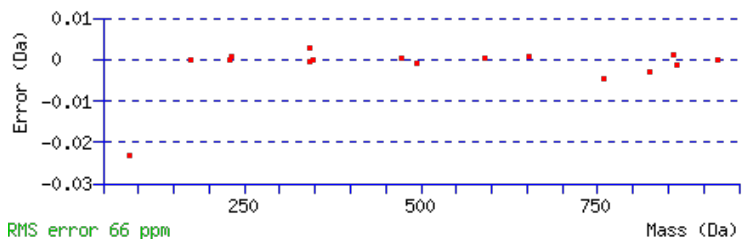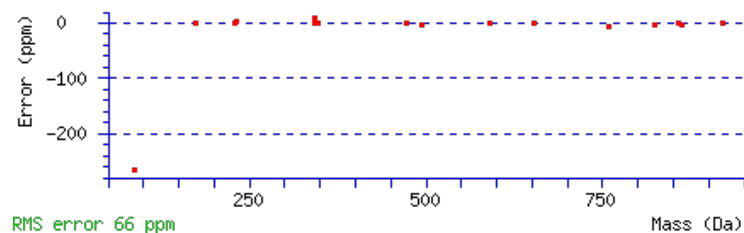

NCBI **BLAST** search of [DINECETPGICMNGR](#)

(Parameters: blastp, nr protein database, expect=20000, no filter, PAM30)

Other BLAST [web gateways](#)

**All matches to this query**

| Score | Mr(calc)  | Delta   | Sequence                        |
|-------|-----------|---------|---------------------------------|
| 34.1  | 1780.7179 | -0.0007 | <a href="#">DINECETPGICMNGR</a> |

Mascot: <http://www.matrixscience.com/>

# Mascot Search Results

## Peptide View

MS/MS Fragmentation of **DINECETPGICMNGR**

Found in **P35555** in **uni\_human\_nr**, FBN1\_HUMAN Fibrillin-1 OS=Homo sapiens GN=FBN1 PE=1 SV=3

Match to Query 5473: 1765.706388 from(883.860470,2+) intensity(2866075.5000) rtinseconds(1943) scans(10308) index(7878)

Title: 130809\_HPL\_Human\_Plaque\_BR1\_TR3\_20\_Spectrum027504\_scans\_\_10308\_RTINSECONDS=1943

Data file E:\RAW\HumanPlaques\mgf\T\1D\T130809\_HPL\_Human\_Plaque\_BR1\_TR3\_20.mgf

Click mouse within plot area to zoom in by factor of two about that point

Or,  to  Da

Label all possible matches  Label matches used for scoring

Show Y-axis

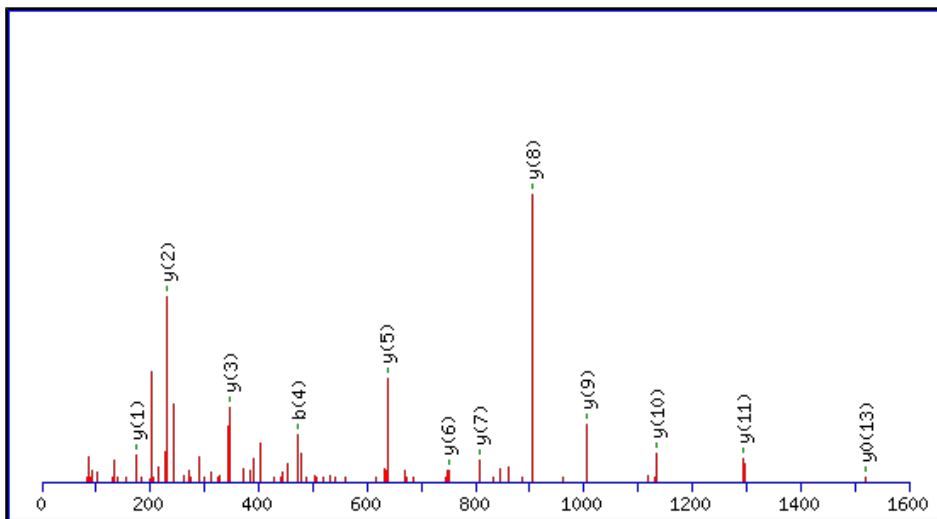

**Monoisotopic mass of neutral peptide Mr(calc):** 1765.7069

**Fixed modifications:** Carbamidomethyl (C) (apply to specified residues or termini only)

**Variable modifications:**

N13 : Deamidated (NQ)

**Ions Score:** 102 **Expect:** 3.7e-010

**Matches :** 12/148 fragment ions using 13 most intense peaks ([help](#))

| #  | b               | b <sup>++</sup> | b <sup>*</sup> | b <sup>*++</sup> | b <sup>0</sup> | b <sup>0++</sup> | Seq. | y                | y <sup>++</sup> | y <sup>*</sup> | y <sup>*++</sup> | y <sup>0</sup> | y <sup>0++</sup> | #  |
|----|-----------------|-----------------|----------------|------------------|----------------|------------------|------|------------------|-----------------|----------------|------------------|----------------|------------------|----|
| 1  | 116.0342        | 58.5207         |                |                  | 98.0237        | 49.5155          | D    |                  |                 |                |                  |                |                  | 15 |
| 2  | 229.1183        | 115.0628        |                |                  | 211.1077       | 106.0575         | I    | 1651.6873        | 826.3473        | 1634.6607      | 817.8340         | 1633.6767      | 817.3420         | 14 |
| 3  | 343.1612        | 172.0842        | 326.1347       | 163.5710         | 325.1506       | 163.0790         | N    | 1538.6032        | 769.8053        | 1521.5767      | 761.2920         | 1520.5927      | 760.8000         | 13 |
| 4  | <b>472.2038</b> | 236.6055        | 455.1773       | 228.0923         | 454.1932       | 227.6003         | E    | 1424.5603        | 712.7838        | 1407.5338      | 704.2705         | 1406.5497      | 703.7785         | 12 |
| 5  | 632.2345        | 316.6209        | 615.2079       | 308.1076         | 614.2239       | 307.6156         | C    | <b>1295.5177</b> | 648.2625        | 1278.4912      | 639.7492         | 1277.5071      | 639.2572         | 11 |
| 6  | 761.2770        | 381.1422        | 744.2505       | 372.6289         | 743.2665       | 372.1369         | E    | <b>1135.4871</b> | 568.2472        | 1118.4605      | 559.7339         | 1117.4765      | 559.2419         | 10 |
| 7  | 862.3247        | 431.6660        | 845.2982       | 423.1527         | 844.3142       | 422.6607         | T    | <b>1006.4445</b> | 503.7259        | 989.4179       | 495.2126         | 988.4339       | 494.7206         | 9  |
| 8  | 959.3775        | 480.1924        | 942.3509       | 471.6791         | 941.3669       | 471.1871         | P    | <b>905.3968</b>  | 453.2020        | 888.3702       | 444.6888         |                |                  | 8  |
| 9  | 1016.3990       | 508.7031        | 999.3724       | 500.1898         | 998.3884       | 499.6978         | G    | <b>808.3440</b>  | 404.6756        | 791.3175       | 396.1624         |                |                  | 7  |
| 10 | 1129.4830       | 565.2451        | 1112.4565      | 556.7319         | 1111.4725      | 556.2399         | I    | <b>751.3226</b>  | 376.1649        | 734.2960       | 367.6516         |                |                  | 6  |
| 11 | 1289.5137       | 645.2605        | 1272.4871      | 636.7472         | 1271.5031      | 636.2552         | C    | <b>638.2385</b>  | 319.6229        | 621.2119       | 311.1096         |                |                  | 5  |
| 12 | 1420.5542       | 710.7807        | 1403.5276      | 702.2674         | 1402.5436      | 701.7754         | M    | 478.2078         | 239.6076        | 461.1813       | 231.0943         |                |                  | 4  |
| 13 | 1535.5811       | 768.2942        | 1518.5545      | 759.7809         | 1517.5705      | 759.2889         | N    | <b>347.1674</b>  | 174.0873        | 330.1408       | 165.5740         |                |                  | 3  |
| 14 | 1592.6026       | 796.8049        | 1575.5760      | 788.2916         | 1574.5920      | 787.7996         | G    | <b>232.1404</b>  | 116.5738        | 215.1139       | 108.0606         |                |                  | 2  |
| 15 |                 |                 |                |                  |                |                  | R    | <b>175.1190</b>  | 88.0631         | 158.0924       | 79.5498          |                |                  | 1  |

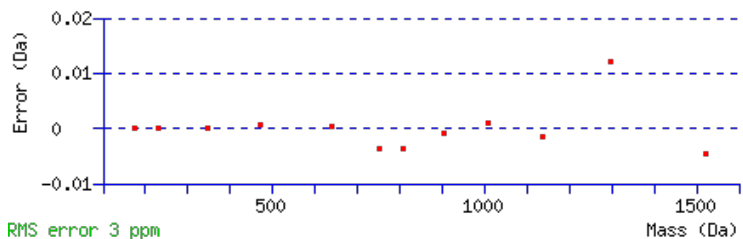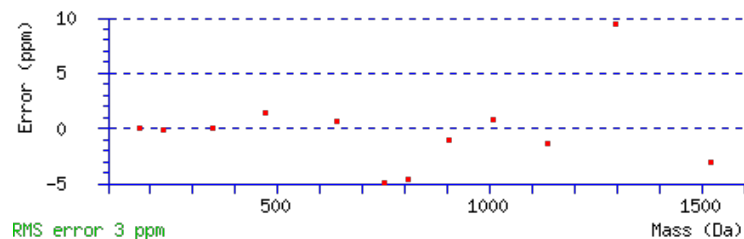

NCBI **BLAST** search of [DINECETPGICMNGR](#)

(Parameters: blastp, nr protein database, expect=20000, no filter, PAM30)

Other BLAST [web gateways](#)

**All matches to this query**

| Score | Mr(calc)  | Delta   | Sequence                        |
|-------|-----------|---------|---------------------------------|
| 101.5 | 1765.7069 | -0.0006 | <a href="#">DINECETPGICMNGR</a> |
| 0.6   | 1764.7081 | 0.9982  | <a href="#">RDDASMDRDDNODGR</a> |

Mascot: <http://www.matrixscience.com/>

# Mascot Search Results

## Peptide View

MS/MS Fragmentation of **DINECETPGICMNGR**

Found in **P35555** in **uni\_human\_nr**, FBN1\_HUMAN Fibrillin-1 OS=Homo sapiens GN=FBN1 PE=1 SV=3

Match to Query 5474: 1765.709982 from(589.577270,3+) intensity(113877.3594) rtinseconds(1944) scans(10311) index(7881)

Title: 130809\_HPL\_Human\_Plaque\_BR1\_TR3\_20\_Spectrum027507\_scans\_\_10311\_RTINSECONDS=1944

Data file E:\RAW\HumanPlaques\mgf\T\1D\T130809\_HPL\_Human\_Plaque\_BR1\_TR3\_20.mgf

Click mouse within plot area to zoom in by factor of two about that point

Or,  to  Da

Label all possible matches  Label matches used for scoring

Show Y-axis

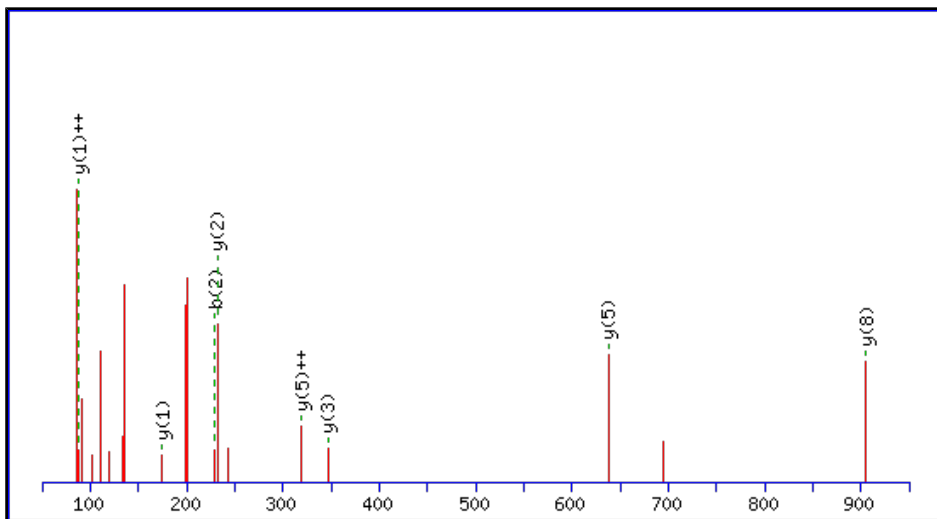

Monoisotopic mass of neutral peptide Mr(calc): 1765.7069

Fixed modifications: Carbamidomethyl (C) (apply to specified residues or termini only)

Variable modifications:

N13 : Deamidated (NQ)

Ions Score: 20 Expect: 0.064

Matches : 8/148 fragment ions using 19 most intense peaks ([help](#))

| #  | b               | b <sup>++</sup> | b <sup>*</sup> | b <sup>*++</sup> | b <sup>0</sup> | b <sup>0++</sup> | Seq. | y               | y <sup>++</sup> | y <sup>*</sup> | y <sup>*++</sup> | y <sup>0</sup> | y <sup>0++</sup> | #  |
|----|-----------------|-----------------|----------------|------------------|----------------|------------------|------|-----------------|-----------------|----------------|------------------|----------------|------------------|----|
| 1  | 116.0342        | 58.5207         |                |                  | 98.0237        | 49.5155          | D    |                 |                 |                |                  |                |                  | 15 |
| 2  | <b>229.1183</b> | 115.0628        |                |                  | 211.1077       | 106.0575         | I    | 1651.6873       | 826.3473        | 1634.6607      | 817.8340         | 1633.6767      | 817.3420         | 14 |
| 3  | 343.1612        | 172.0842        | 326.1347       | 163.5710         | 325.1506       | 163.0790         | N    | 1538.6032       | 769.8053        | 1521.5767      | 761.2920         | 1520.5927      | 760.8000         | 13 |
| 4  | 472.2038        | 236.6055        | 455.1773       | 228.0923         | 454.1932       | 227.6003         | E    | 1424.5603       | 712.7838        | 1407.5338      | 704.2705         | 1406.5497      | 703.7785         | 12 |
| 5  | 632.2345        | 316.6209        | 615.2079       | 308.1076         | 614.2239       | 307.6156         | C    | 1295.5177       | 648.2625        | 1278.4912      | 639.7492         | 1277.5071      | 639.2572         | 11 |
| 6  | 761.2770        | 381.1422        | 744.2505       | 372.6289         | 743.2665       | 372.1369         | E    | 1135.4871       | 568.2472        | 1118.4605      | 559.7339         | 1117.4765      | 559.2419         | 10 |
| 7  | 862.3247        | 431.6660        | 845.2982       | 423.1527         | 844.3142       | 422.6607         | T    | 1006.4445       | 503.7259        | 989.4179       | 495.2126         | 988.4339       | 494.7206         | 9  |
| 8  | 959.3775        | 480.1924        | 942.3509       | 471.6791         | 941.3669       | 471.1871         | P    | <b>905.3968</b> | 453.2020        | 888.3702       | 444.6888         |                |                  | 8  |
| 9  | 1016.3990       | 508.7031        | 999.3724       | 500.1898         | 998.3884       | 499.6978         | G    | 808.3440        | 404.6756        | 791.3175       | 396.1624         |                |                  | 7  |
| 10 | 1129.4830       | 565.2451        | 1112.4565      | 556.7319         | 1111.4725      | 556.2399         | I    | 751.3226        | 376.1649        | 734.2960       | 367.6516         |                |                  | 6  |
| 11 | 1289.5137       | 645.2605        | 1272.4871      | 636.7472         | 1271.5031      | 636.2552         | C    | <b>638.2385</b> | <b>319.6229</b> | 621.2119       | 311.1096         |                |                  | 5  |
| 12 | 1420.5542       | 710.7807        | 1403.5276      | 702.2674         | 1402.5436      | 701.7754         | M    | 478.2078        | 239.6076        | 461.1813       | 231.0943         |                |                  | 4  |
| 13 | 1535.5811       | 768.2942        | 1518.5545      | 759.7809         | 1517.5705      | 759.2889         | N    | <b>347.1674</b> | 174.0873        | 330.1408       | 165.5740         |                |                  | 3  |
| 14 | 1592.6026       | 796.8049        | 1575.5760      | 788.2916         | 1574.5920      | 787.7996         | G    | <b>232.1404</b> | 116.5738        | 215.1139       | 108.0606         |                |                  | 2  |
| 15 |                 |                 |                |                  |                |                  | R    | <b>175.1190</b> | <b>88.0631</b>  | 158.0924       | 79.5498          |                |                  | 1  |

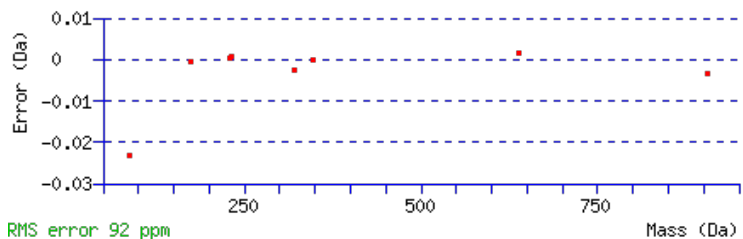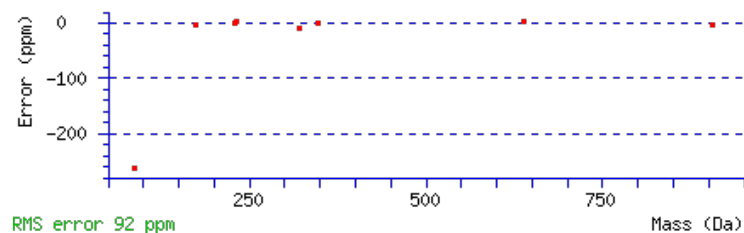

NCBI **BLAST** search of [DINECETPGICMNGR](#)

(Parameters: blastp, nr protein database, expect=20000, no filter, PAM30)

Other BLAST [web gateways](#)

**All matches to this query**

| Score | Mr(calc)  | Delta  | Sequence                        |
|-------|-----------|--------|---------------------------------|
| 20.3  | 1765.7069 | 0.0030 | <a href="#">DINECETPGICMNGR</a> |

Mascot: <http://www.matrixscience.com/>

# Mascot Search Results

## Peptide View

MS/MS Fragmentation of **DINECETPGICMNGR**

Found in **P35555** in **uni\_human\_nr**, FBN1\_HUMAN Fibrillin-1 OS=Homo sapiens GN=FBN1 PE=1 SV=3

Match to Query 5426: 1764.721768 from(883.368160,2+) intensity(20760472.0000) rtinseconds(1829) scans(9355) index(6637)

Title: 130806\_HPL\_Human\_Plaque\_BR1\_TR2\_15\_Spectrum026968\_scans\_9355\_RTINSECONDS=1829

Data file E:\RAW\HumanPlaques\mgf0\T\1D\T130806\_HPL\_Human\_Plaque\_BR1\_TR2\_15.mgf

Click mouse within plot area to zoom in by factor of two about that point

Or,  to  Da

Label all possible matches  Label matches used for scoring

Show Y-axis

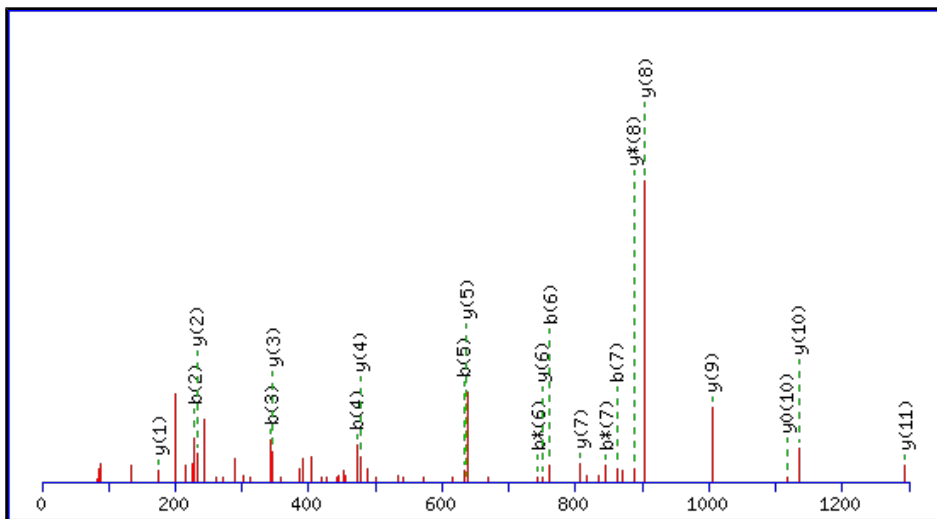

Monoisotopic mass of neutral peptide **Mr(calc)**: 1764.7229

Fixed modifications: Carbamidomethyl (C) (apply to specified residues or termini only)

Ions Score: 77 Expect: 2.2e-007

Matches : 21/148 fragment ions using 37 most intense peaks ([help](#))

| #  | b               | b <sup>++</sup> | b <sup>*</sup>  | b <sup>*++</sup> | b <sup>0</sup> | b <sup>0++</sup> | Seq. | y                | y <sup>++</sup> | y <sup>*</sup>  | y <sup>*++</sup> | y <sup>0</sup>   | y <sup>0++</sup> | #  |
|----|-----------------|-----------------|-----------------|------------------|----------------|------------------|------|------------------|-----------------|-----------------|------------------|------------------|------------------|----|
| 1  | 116.0342        | 58.5207         |                 |                  | 98.0237        | 49.5155          | D    |                  |                 |                 |                  |                  |                  | 15 |
| 2  | <b>229.1183</b> | 115.0628        |                 |                  | 211.1077       | 106.0575         | I    | 1650.7033        | 825.8553        | 1633.6767       | 817.3420         | 1632.6927        | 816.8500         | 14 |
| 3  | <b>343.1612</b> | 172.0842        | 326.1347        | 163.5710         | 325.1506       | 163.0790         | N    | 1537.6192        | 769.3132        | 1520.5927       | 760.8000         | 1519.6086        | 760.3080         | 13 |
| 4  | <b>472.2038</b> | 236.6055        | 455.1773        | 228.0923         | 454.1932       | 227.6003         | E    | 1423.5763        | 712.2918        | 1406.5497       | 703.7785         | 1405.5657        | 703.2865         | 12 |
| 5  | <b>632.2345</b> | 316.6209        | 615.2079        | 308.1076         | 614.2239       | 307.6156         | C    | <b>1294.5337</b> | 647.7705        | 1277.5071       | 639.2572         | 1276.5231        | 638.7652         | 11 |
| 6  | <b>761.2770</b> | 381.1422        | <b>744.2505</b> | 372.6289         | 743.2665       | 372.1369         | E    | <b>1134.5030</b> | 567.7552        | 1117.4765       | 559.2419         | <b>1116.4925</b> | 558.7499         | 10 |
| 7  | <b>862.3247</b> | 431.6660        | <b>845.2982</b> | 423.1527         | 844.3142       | 422.6607         | T    | <b>1005.4604</b> | 503.2339        | 988.4339        | 494.7206         | 987.4499         | 494.2286         | 9  |
| 8  | 959.3775        | 480.1924        | 942.3509        | 471.6791         | 941.3669       | 471.1871         | P    | <b>904.4128</b>  | 452.7100        | <b>887.3862</b> | 444.1967         |                  |                  | 8  |
| 9  | 1016.3990       | 508.7031        | 999.3724        | 500.1898         | 998.3884       | 499.6978         | G    | <b>807.3600</b>  | 404.1836        | 790.3335        | 395.6704         |                  |                  | 7  |
| 10 | 1129.4830       | 565.2451        | 1112.4565       | 556.7319         | 1111.4725      | 556.2399         | I    | <b>750.3385</b>  | 375.6729        | 733.3120        | 367.1596         |                  |                  | 6  |
| 11 | 1289.5137       | 645.2605        | 1272.4871       | 636.7472         | 1271.5031      | 636.2552         | C    | <b>637.2545</b>  | 319.1309        | 620.2279        | 310.6176         |                  |                  | 5  |
| 12 | 1420.5542       | 710.7807        | 1403.5276       | 702.2674         | 1402.5436      | 701.7754         | M    | <b>477.2238</b>  | 239.1156        | 460.1973        | 230.6023         |                  |                  | 4  |
| 13 | 1534.5971       | 767.8022        | 1517.5705       | 759.2889         | 1516.5865      | 758.7969         | N    | <b>346.1833</b>  | 173.5953        | 329.1568        | 165.0820         |                  |                  | 3  |
| 14 | 1591.6185       | 796.3129        | 1574.5920       | 787.7996         | 1573.6080      | 787.3076         | G    | <b>232.1404</b>  | 116.5738        | 215.1139        | 108.0606         |                  |                  | 2  |
| 15 |                 |                 |                 |                  |                |                  | R    | <b>175.1190</b>  | 88.0631         | 158.0924        | 79.5498          |                  |                  | 1  |

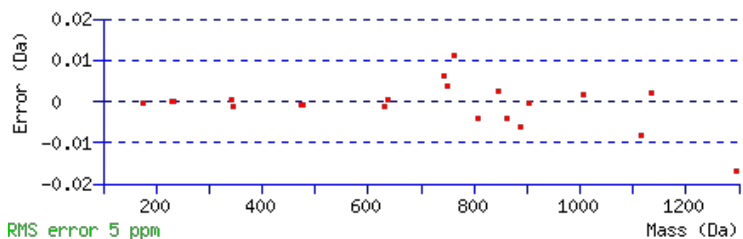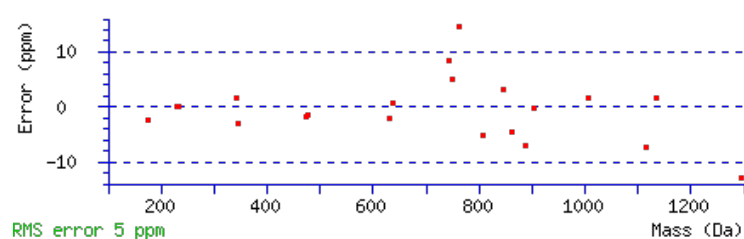

NCBI BLAST search of [DINECETPGICMNGR](#)

(Parameters: blastp, nr protein database, expect=20000, no filter, PAM30)

Other BLAST [web gateways](#)

**All matches to this query**

| Score | Mr(calc)  | Delta   | Sequence                        |
|-------|-----------|---------|---------------------------------|
| 76.7  | 1764.7229 | -0.0012 | <a href="#">DINECETPGICMNGR</a> |

Mascot: <http://www.matrixscience.com/>

# Mascot Search Results

## Peptide View

MS/MS Fragmentation of **DINECETPGICMNGR**

Found in **P35555** in **uni\_human\_nr**, FBN1\_HUMAN Fibrillin-1 OS=Homo sapiens GN=FBN1 PE=1 SV=3

Match to Query 5136: 1764.723582 from(589.248470,3+) intensity(1112687.2500) rtinseconds(1826) scans(9175) index(6343)

Title: 130801\_HPL\_Human\_Plaque\_BR1\_TR1\_15\_Spectrum026496\_scans\_9175\_RTINSECONDS=1826

Data file E:\RAW\HumanPlaques\mgf\T\1D\T130801\_HPL\_Human\_Plaque\_BR1\_TR1\_15.mgf

Click mouse within plot area to zoom in by factor of two about that point

Or,  to  Da

Label all possible matches  Label matches used for scoring

Show Y-axis

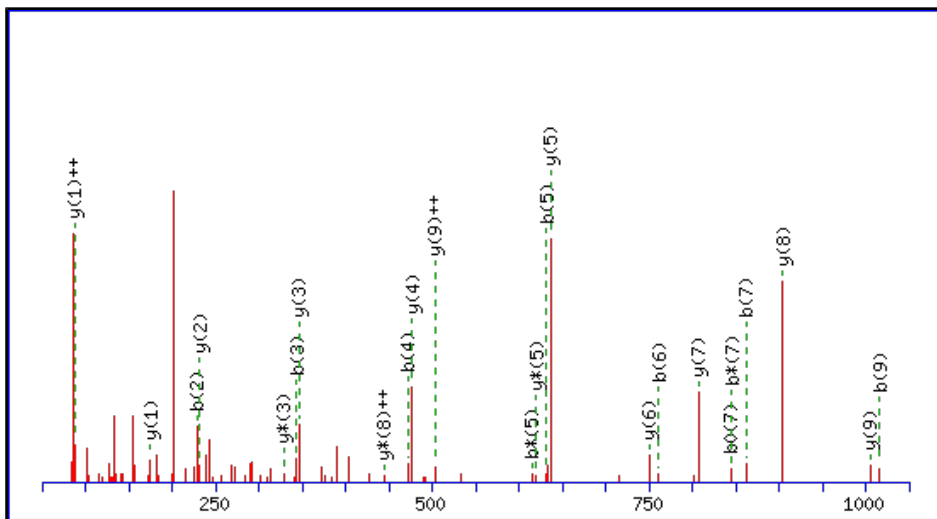

Monoisotopic mass of neutral peptide **Mr(calc):** 1764.7229

Fixed modifications: Carbamidomethyl (C) (apply to specified residues or termini only)

Ions Score: 58 Expect: 1.8e-005

Matches : 24/148 fragment ions using 51 most intense peaks ([help](#))

| #  | b                | b <sup>++</sup> | b*              | b <sup>*++</sup> | b <sup>0</sup>  | b <sup>0++</sup> | Seq. | y                | y <sup>++</sup> | y*              | y <sup>*++</sup> | y <sup>0</sup> | y <sup>0++</sup> | #  |
|----|------------------|-----------------|-----------------|------------------|-----------------|------------------|------|------------------|-----------------|-----------------|------------------|----------------|------------------|----|
| 1  | 116.0342         | 58.5207         |                 |                  | 98.0237         | 49.5155          | D    |                  |                 |                 |                  |                |                  | 15 |
| 2  | <b>229.1183</b>  | 115.0628        |                 |                  | 211.1077        | 106.0575         | I    | 1650.7033        | 825.8553        | 1633.6767       | 817.3420         | 1632.6927      | 816.8500         | 14 |
| 3  | <b>343.1612</b>  | 172.0842        | 326.1347        | 163.5710         | 325.1506        | 163.0790         | N    | 1537.6192        | 769.3132        | 1520.5927       | 760.8000         | 1519.6086      | 760.3080         | 13 |
| 4  | <b>472.2038</b>  | 236.6055        | 455.1773        | 228.0923         | 454.1932        | 227.6003         | E    | 1423.5763        | 712.2918        | 1406.5497       | 703.7785         | 1405.5657      | 703.2865         | 12 |
| 5  | <b>632.2345</b>  | 316.6209        | <b>615.2079</b> | 308.1076         | 614.2239        | 307.6156         | C    | 1294.5337        | 647.7705        | 1277.5071       | 639.2572         | 1276.5231      | 638.7652         | 11 |
| 6  | <b>761.2770</b>  | 381.1422        | 744.2505        | 372.6289         | 743.2665        | 372.1369         | E    | 1134.5030        | 567.7552        | 1117.4765       | 559.2419         | 1116.4925      | 558.7499         | 10 |
| 7  | <b>862.3247</b>  | 431.6660        | <b>845.2982</b> | 423.1527         | <b>844.3142</b> | 422.6607         | T    | <b>1005.4604</b> | <b>503.2339</b> | 988.4339        | 494.7206         | 987.4499       | 494.2286         | 9  |
| 8  | 959.3775         | 480.1924        | 942.3509        | 471.6791         | 941.3669        | 471.1871         | P    | <b>904.4128</b>  | 452.7100        | 887.3862        | <b>444.1967</b>  |                |                  | 8  |
| 9  | <b>1016.3990</b> | 508.7031        | 999.3724        | 500.1898         | 998.3884        | 499.6978         | G    | <b>807.3600</b>  | 404.1836        | 790.3335        | 395.6704         |                |                  | 7  |
| 10 | 1129.4830        | 565.2451        | 1112.4565       | 556.7319         | 1111.4725       | 556.2399         | I    | <b>750.3385</b>  | 375.6729        | 733.3120        | 367.1596         |                |                  | 6  |
| 11 | 1289.5137        | 645.2605        | 1272.4871       | 636.7472         | 1271.5031       | 636.2552         | C    | <b>637.2545</b>  | 319.1309        | <b>620.2279</b> | 310.6176         |                |                  | 5  |
| 12 | 1420.5542        | 710.7807        | 1403.5276       | 702.2674         | 1402.5436       | 701.7754         | M    | <b>477.2238</b>  | 239.1156        | 460.1973        | 230.6023         |                |                  | 4  |
| 13 | 1534.5971        | 767.8022        | 1517.5705       | 759.2889         | 1516.5865       | 758.7969         | N    | <b>346.1833</b>  | 173.5953        | <b>329.1568</b> | 165.0820         |                |                  | 3  |
| 14 | 1591.6185        | 796.3129        | 1574.5920       | 787.7996         | 1573.6080       | 787.3076         | G    | <b>232.1404</b>  | 116.5738        | 215.1139        | 108.0606         |                |                  | 2  |
| 15 |                  |                 |                 |                  |                 |                  | R    | <b>175.1190</b>  | <b>88.0631</b>  | 158.0924        | 79.5498          |                |                  | 1  |



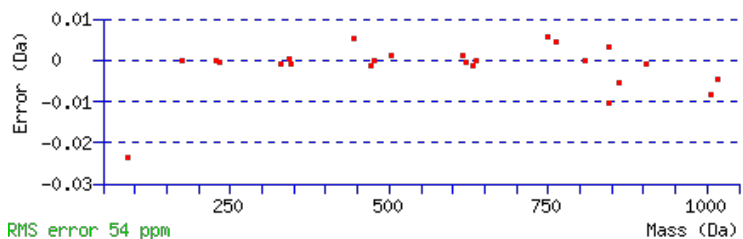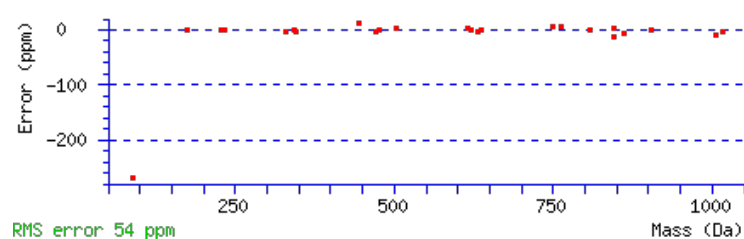

NCBI BLAST search of [DINECETPGICMNGR](#)

(Parameters: blastp, nr protein database, expect=20000, no filter, PAM30)

Other BLAST [web gateways](#)

**All matches to this query**

| Score | Mr(calc)  | Delta  | Sequence                        |
|-------|-----------|--------|---------------------------------|
| 57.7  | 1764.7229 | 0.0007 | <a href="#">DINECETPGICMNGR</a> |

Mascot: <http://www.matrixscience.com/>

# Mascot Search Results

## Peptide View

MS/MS Fragmentation of **RPDGEGVDENECQTKPGICENGR**

Found in **P35555** in **uni\_human\_nr**, FBN1\_HUMAN Fibrillin-1 OS=Homo sapiens GN=FBN1 PE=1 SV=3

Match to Query 13239: 2777.141776 from(695.292720,4+) intensity(1093211.5000) rtinseconds(1196) scans(5388) index(3379)

Title: 130806\_HPL\_Human\_Plaque\_BR1\_TR2\_18\_Spectrum023527\_scans\_5388\_RTINSECONDS=1196

Data file E:\\RAW\\HumanPlaques\\imgf\\T\\1D\\T130806\_HPL\_Human\_Plaque\_BR1\_TR2\_18.mgf

Click mouse within plot area to zoom in by factor of two about that point

Or, to Da  
 Label all possible matches Label matches used for scoring  
 Show Y-axis

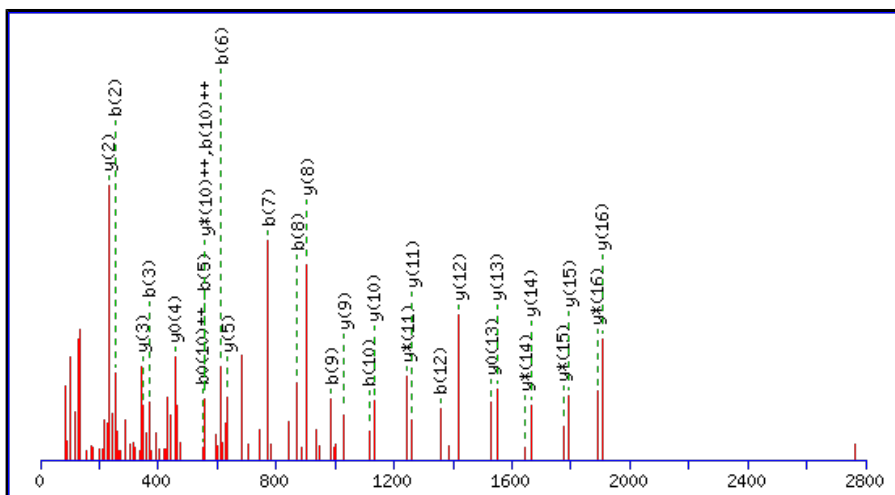

Monoisotopic mass of neutral peptide **Mr(calc): 2777.1439**

Fixed modifications: Carbamidomethyl (C) (apply to specified residues or termini only)

Variable modifications:

N22 : Deamidated (NQ)

Ions Score: 92 Expect: 5.7e-009

Matches : 30/266 fragment ions using 48 most intense peaks ([help](#))

| #  | b                | b <sup>++</sup> | b <sup>*</sup> | b <sup>*++</sup> | b <sup>0</sup> | b <sup>0++</sup> | Seq. | y                | y <sup>++</sup> | y <sup>*</sup>   | y <sup>*++</sup> | y <sup>0</sup>   | y <sup>0++</sup> | #  |
|----|------------------|-----------------|----------------|------------------|----------------|------------------|------|------------------|-----------------|------------------|------------------|------------------|------------------|----|
| 1  | 157.1084         | 79.0578         | 140.0818       | 70.5446          |                |                  | R    |                  |                 |                  |                  |                  |                  | 24 |
| 2  | <b>254.1612</b>  | 127.5842        | 237.1346       | 119.0709         |                |                  | P    | 2622.0501        | 1311.5287       | 2605.0236        | 1303.0154        | 2604.0395        | 1302.5234        | 23 |
| 3  | <b>369.1881</b>  | 185.0977        | 352.1615       | 176.5844         | 351.1775       | 176.0924         | D    | 2524.9973        | 1263.0023       | 2507.9708        | 1254.4890        | 2506.9868        | 1253.9970        | 22 |
| 4  | 426.2096         | 213.6084        | 409.1830       | 205.0951         | 408.1990       | 204.6031         | G    | 2409.9704        | 1205.4888       | 2392.9439        | 1196.9756        | 2391.9598        | 1196.4836        | 21 |
| 5  | <b>555.2522</b>  | 278.1297        | 538.2256       | 269.6164         | 537.2416       | 269.1244         | E    | 2352.9489        | 1176.9781       | 2335.9224        | 1168.4648        | 2334.9384        | 1167.9728        | 20 |
| 6  | <b>612.2736</b>  | 306.6404        | 595.2471       | 298.1272         | 594.2631       | 297.6352         | G    | 2223.9063        | 1112.4568       | 2206.8798        | 1103.9435        | 2205.8958        | 1103.4515        | 19 |
| 7  | <b>772.3043</b>  | 386.6558        | 755.2777       | 378.1425         | 754.2937       | 377.6505         | C    | 2166.8849        | 1083.9461       | 2149.8583        | 1075.4328        | 2148.8743        | 1074.9408        | 18 |
| 8  | <b>871.3727</b>  | 436.1900        | 854.3461       | 427.6767         | 853.3621       | 427.1847         | V    | 2006.8542        | 1003.9308       | 1989.8277        | 995.4175         | 1988.8437        | 994.9255         | 17 |
| 9  | <b>986.3996</b>  | 493.7034        | 969.3731       | 485.1902         | 968.3891       | 484.6982         | D    | <b>1907.7858</b> | 954.3965        | <b>1890.7593</b> | 945.8833         | 1889.7753        | 945.3913         | 16 |
| 10 | <b>1115.4422</b> | <b>558.2247</b> | 1098.4157      | 549.7115         | 1097.4316      | <b>549.2195</b>  | E    | <b>1792.7589</b> | 896.8831        | <b>1775.7323</b> | 888.3698         | 1774.7483        | 887.8778         | 15 |
| 11 | 1229.4851        | 615.2462        | 1212.4586      | 606.7329         | 1211.4746      | 606.2409         | N    | <b>1663.7163</b> | 832.3618        | <b>1646.6897</b> | 823.8485         | 1645.7057        | 823.3565         | 14 |
| 12 | <b>1358.5277</b> | 679.7675        | 1341.5012      | 671.2542         | 1340.5172      | 670.7622         | E    | <b>1549.6734</b> | 775.3403        | 1532.6468        | 766.8270         | <b>1531.6628</b> | 766.3350         | 13 |
| 13 | 1518.5584        | 759.7828        | 1501.5318      | 751.2696         | 1500.5478      | 750.7775         | C    | <b>1420.6308</b> | 710.8190        | 1403.6042        | 702.3057         | 1402.6202        | 701.8137         | 12 |
| 14 | 1646.6170        | 823.8121        | 1629.5904      | 815.2988         | 1628.6064      | 814.8068         | Q    | <b>1260.6001</b> | 630.8037        | <b>1243.5736</b> | 622.2904         | 1242.5895        | 621.7984         | 11 |
| 15 | 1747.6646        | 874.3360        | 1730.6381      | 865.8227         | 1729.6541      | 865.3307         | T    | <b>1132.5415</b> | 566.7744        | 1115.5150        | <b>558.2611</b>  | 1114.5310        | 557.7691         | 10 |
| 16 | 1875.7596        | 938.3834        | 1858.7331      | 929.8702         | 1857.7490      | 929.3782         | K    | <b>1031.4939</b> | 516.2506        | 1014.4673        | 507.7373         | 1013.4833        | 507.2453         | 9  |
| 17 | 1972.8124        | 986.9098        | 1955.7858      | 978.3965         | 1954.8018      | 977.9045         | P    | <b>903.3989</b>  | 452.2031        | 886.3723         | 443.6898         | 885.3883         | 443.1978         | 8  |
| 18 | 2029.8338        | 1015.4206       | 2012.8073      | 1006.9073        | 2011.8233      | 1006.4153        | G    | 806.3461         | 403.6767        | 789.3196         | 395.1634         | 788.3356         | 394.6714         | 7  |

|    |           |           |           |           |           |           |   |          |          |          |          |          |          |   |
|----|-----------|-----------|-----------|-----------|-----------|-----------|---|----------|----------|----------|----------|----------|----------|---|
| 19 | 2142.9179 | 1071.9626 | 2125.8913 | 1063.4493 | 2124.9073 | 1062.9573 | I | 749.3247 | 375.1660 | 732.2981 | 366.6527 | 731.3141 | 366.1607 | 6 |
| 20 | 2302.9485 | 1151.9779 | 2285.9220 | 1143.4646 | 2284.9380 | 1142.9726 | C | 636.2406 | 318.6239 | 619.2141 | 310.1107 | 618.2300 | 309.6187 | 5 |
| 21 | 2431.9911 | 1216.4992 | 2414.9646 | 1207.9859 | 2413.9806 | 1207.4939 | E | 476.2100 | 238.6086 | 459.1834 | 230.0953 | 458.1994 | 229.6033 | 4 |
| 22 | 2547.0181 | 1274.0127 | 2529.9915 | 1265.4994 | 2529.0075 | 1265.0074 | N | 347.1674 | 174.0873 | 330.1408 | 165.5740 |          |          | 3 |
| 23 | 2604.0395 | 1302.5234 | 2587.0130 | 1294.0101 | 2586.0290 | 1293.5181 | G | 232.1404 | 116.5738 | 215.1139 | 108.0606 |          |          | 2 |
| 24 |           |           |           |           |           |           | R | 175.1190 | 88.0631  | 158.0924 | 79.5498  |          |          | 1 |

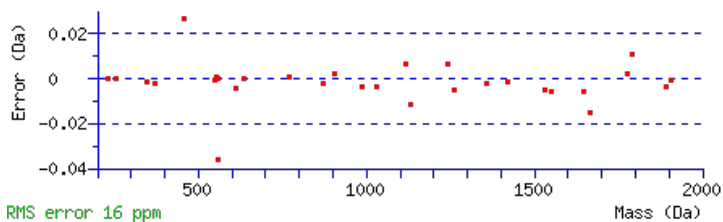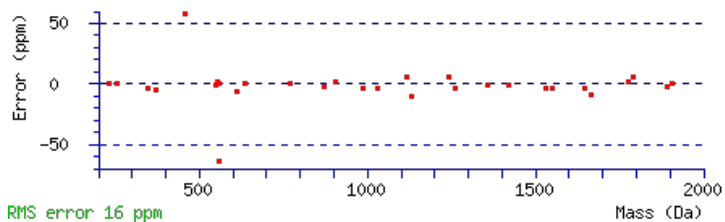

NCBI BLAST search of [RPDGEGCVDENECQTKPGICENGR](#)

(Parameters: blastp, nr protein database, expect=20000, no filter, PAM30)

Other BLAST [web gateways](#)

All matches to this query

| Score | Mr(calc)  | Delta   | Sequence                                 | Site Analysis         |
|-------|-----------|---------|------------------------------------------|-----------------------|
| 92.4  | 2777.1439 | -0.0022 | <a href="#">RPDGEGCVDENECQTKPGICENGR</a> | Deamidated N22 99.95% |
| 59.2  | 2777.1439 | -0.0022 | <a href="#">RPDGEGCVDENECQTKPGICENGR</a> | Deamidated Q14 0.05%  |
| 34.8  | 2777.1439 | -0.0022 | <a href="#">RPDGEGCVDENECQTKPGICENGR</a> | Deamidated N11 0.00%  |

Mascot: <http://www.matrixscience.com/>

# Mascot Search Results

## Peptide View

MS/MS Fragmentation of **RPDGEGVDENECQTKPGICENGR**

Found in **P35555** in **uni\_human\_nr**, FBN1\_HUMAN Fibrillin-1 OS=Homo sapiens GN=FBN1 PE=1 SV=3

Match to Query 11982: 2777.139856 from(695.292240,4+) intensity(230531.3281) rtinseconds(1212) scans(5250) index(3074)

Title: 130801\_HPL\_Human\_Plaque\_BR1\_TR1\_17\_Spectrum023238\_scans\_5250\_RTINSECONDS=1212

Data file E:\\RAW\\HumanPlaques\\imgf\\T\\1D\\T130801\_HPL\_Human\_Plaque\_BR1\_TR1\_17.mgf

Click mouse within plot area to zoom in by factor of two about that point

Or,  to  Da

Label all possible matches  Label matches used for scoring

Show Y-axis

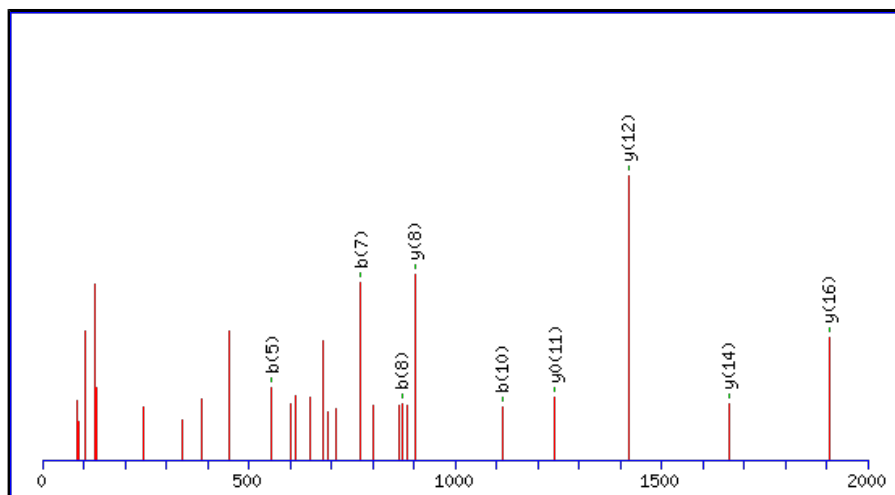

Monoisotopic mass of neutral peptide  $M_r(\text{calc})$ : 2777.1439

Fixed modifications: Carbamidomethyl (C) (apply to specified residues or termini only)

Variable modifications:

Q14 : Deamidated (NQ)

Ions Score: 24 Expect: 0.037

Matches : 9/266 fragment ions using 14 most intense peaks ([help](#))

| #  | b                | b <sup>++</sup> | b <sup>*</sup> | b <sup>***</sup> | b <sup>0</sup> | b <sup>0++</sup> | Seq. | y                | y <sup>++</sup> | y <sup>*</sup> | y <sup>***</sup> | y <sup>0</sup>   | y <sup>0++</sup> | #  |
|----|------------------|-----------------|----------------|------------------|----------------|------------------|------|------------------|-----------------|----------------|------------------|------------------|------------------|----|
| 1  | 157.1084         | 79.0578         | 140.0818       | 70.5446          |                |                  | R    |                  |                 |                |                  |                  |                  | 24 |
| 2  | 254.1612         | 127.5842        | 237.1346       | 119.0709         |                |                  | P    | 2622.0501        | 1311.5287       | 2605.0236      | 1303.0154        | 2604.0395        | 1302.5234        | 23 |
| 3  | 369.1881         | 185.0977        | 352.1615       | 176.5844         | 351.1775       | 176.0924         | D    | 2524.9973        | 1263.0023       | 2507.9708      | 1254.4890        | 2506.9868        | 1253.9970        | 22 |
| 4  | 426.2096         | 213.6084        | 409.1830       | 205.0951         | 408.1990       | 204.6031         | G    | 2409.9704        | 1205.4888       | 2392.9439      | 1196.9756        | 2391.9598        | 1196.4836        | 21 |
| 5  | <b>555.2522</b>  | 278.1297        | 538.2256       | 269.6164         | 537.2416       | 269.1244         | E    | 2352.9489        | 1176.9781       | 2335.9224      | 1168.4648        | 2334.9384        | 1167.9728        | 20 |
| 6  | 612.2736         | 306.6404        | 595.2471       | 298.1272         | 594.2631       | 297.6352         | G    | 2223.9063        | 1112.4568       | 2206.8798      | 1103.9435        | 2205.8958        | 1103.4515        | 19 |
| 7  | <b>772.3043</b>  | 386.6558        | 755.2777       | 378.1425         | 754.2937       | 377.6505         | C    | 2166.8849        | 1083.9461       | 2149.8583      | 1075.4328        | 2148.8743        | 1074.9408        | 18 |
| 8  | <b>871.3727</b>  | 436.1900        | 854.3461       | 427.6767         | 853.3621       | 427.1847         | V    | 2006.8542        | 1003.9308       | 1989.8277      | 995.4175         | 1988.8437        | 994.9255         | 17 |
| 9  | 986.3996         | 493.7034        | 969.3731       | 485.1902         | 968.3891       | 484.6982         | D    | <b>1907.7858</b> | 954.3965        | 1890.7593      | 945.8833         | 1889.7753        | 945.3913         | 16 |
| 10 | <b>1115.4422</b> | 558.2247        | 1098.4157      | 549.7115         | 1097.4316      | 549.2195         | E    | 1792.7589        | 896.8831        | 1775.7323      | 888.3698         | 1774.7483        | 887.8778         | 15 |
| 11 | 1229.4851        | 615.2462        | 1212.4586      | 606.7329         | 1211.4746      | 606.2409         | N    | <b>1663.7163</b> | 832.3618        | 1646.6897      | 823.8485         | 1645.7057        | 823.3565         | 14 |
| 12 | 1358.5277        | 679.7675        | 1341.5012      | 671.2542         | 1340.5172      | 670.7622         | E    | 1549.6734        | 775.3403        | 1532.6468      | 766.8270         | 1531.6628        | 766.3350         | 13 |
| 13 | 1518.5584        | 759.7828        | 1501.5318      | 751.2696         | 1500.5478      | 750.7775         | C    | <b>1420.6308</b> | 710.8190        | 1403.6042      | 702.3057         | 1402.6202        | 701.8137         | 12 |
| 14 | 1647.6010        | 824.3041        | 1630.5744      | 815.7909         | 1629.5904      | 815.2988         | Q    | 1260.6001        | 630.8037        | 1243.5736      | 622.2904         | <b>1242.5895</b> | 621.7984         | 11 |
| 15 | 1748.6487        | 874.8280        | 1731.6221      | 866.3147         | 1730.6381      | 865.8227         | T    | 1131.5575        | 566.2824        | 1114.5310      | 557.7691         | 1113.5470        | 557.2771         | 10 |
| 16 | 1876.7436        | 938.8754        | 1859.7171      | 930.3622         | 1858.7331      | 929.8702         | K    | 1030.5098        | 515.7586        | 1013.4833      | 507.2453         | 1012.4993        | 506.7533         | 9  |
| 17 | 1973.7964        | 987.4018        | 1956.7698      | 978.8886         | 1955.7858      | 978.3965         | P    | <b>902.4149</b>  | 451.7111        | 885.3883       | 443.1978         | 884.4043         | 442.7058         | 8  |
| 18 | 2030.8178        | 1015.9126       | 2013.7913      | 1007.3993        | 2012.8073      | 1006.9073        | G    | 805.3621         | 403.1847        | 788.3356       | 394.6714         | 787.3515         | 394.1794         | 7  |

|    |           |           |           |           |           |           |   |          |          |          |          |          |          |   |
|----|-----------|-----------|-----------|-----------|-----------|-----------|---|----------|----------|----------|----------|----------|----------|---|
| 19 | 2143.9019 | 1072.4546 | 2126.8754 | 1063.9413 | 2125.8913 | 1063.4493 | I | 748.3406 | 374.6740 | 731.3141 | 366.1607 | 730.3301 | 365.6687 | 6 |
| 20 | 2303.9326 | 1152.4699 | 2286.9060 | 1143.9566 | 2285.9220 | 1143.4646 | C | 635.2566 | 318.1319 | 618.2300 | 309.6187 | 617.2460 | 309.1266 | 5 |
| 21 | 2432.9752 | 1216.9912 | 2415.9486 | 1208.4779 | 2414.9646 | 1207.9859 | E | 475.2259 | 238.1166 | 458.1994 | 229.6033 | 457.2154 | 229.1113 | 4 |
| 22 | 2547.0181 | 1274.0127 | 2529.9915 | 1265.4994 | 2529.0075 | 1265.0074 | N | 346.1833 | 173.5953 | 329.1568 | 165.0820 |          |          | 3 |
| 23 | 2604.0395 | 1302.5234 | 2587.0130 | 1294.0101 | 2586.0290 | 1293.5181 | G | 232.1404 | 116.5738 | 215.1139 | 108.0606 |          |          | 2 |
| 24 |           |           |           |           |           |           | R | 175.1190 | 88.0631  | 158.0924 | 79.5498  |          |          | 1 |

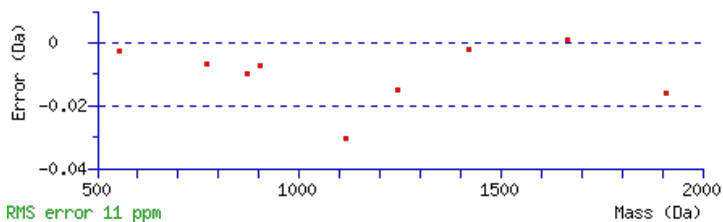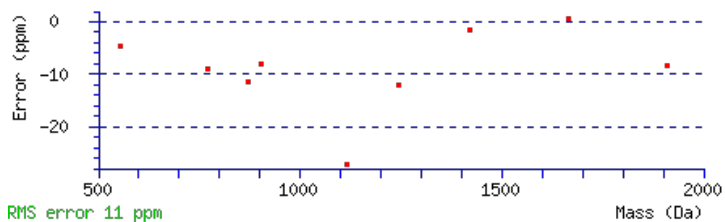

NCBI BLAST search of [RPDGEGCVDENECQTKPGICENGR](#)

(Parameters: blastp, nr protein database, expect=20000, no filter, PAM30)

Other BLAST [web gateways](#)

All matches to this query

| Score | Mr(calc)  | Delta   | Sequence                                 | Site Analysis         |
|-------|-----------|---------|------------------------------------------|-----------------------|
| 24.3  | 2777.1439 | -0.0041 | <a href="#">RPDGEGCVDENECQTKPGICENGR</a> | Deamidated Q14 60.49% |
| 19.8  | 2777.1439 | -0.0041 | <a href="#">RPDGEGCVDENECQTKPGICENGR</a> | Deamidated N22 21.41% |
| 19.1  | 2777.1439 | -0.0041 | <a href="#">RPDGEGCVDENECQTKPGICENGR</a> | Deamidated N11 18.10% |

Mascot: <http://www.matrixscience.com/>

# Mascot Search Results

## Peptide View

MS/MS Fragmentation of **RPDGEGCVDENECQTKPGICENGR**

Found in **P35555** in **uni\_human\_nr**, FBN1\_HUMAN Fibrillin-1 OS=Homo sapiens GN=FBN1 PE=1 SV=3

Match to Query 11313: 2776.160096 from(695.047300,4+) intensity(4720271.5000) rtinseconds(1145) scans(4623) index(2386)

Title: 130801\_HPL\_Human\_Plaque\_BR1\_TR1\_15\_Spectrum022539\_scans\_4623\_RTINSECONDS=1145

Data file E:\\RAW\\HumanPlaques\\imgf\\T\\1D\\T130801\_HPL\_Human\_Plaque\_BR1\_TR1\_15.mgf

Click mouse within plot area to zoom in by factor of two about that point

Or,  to  Da

Label all possible matches  Label matches used for scoring

Show Y-axis

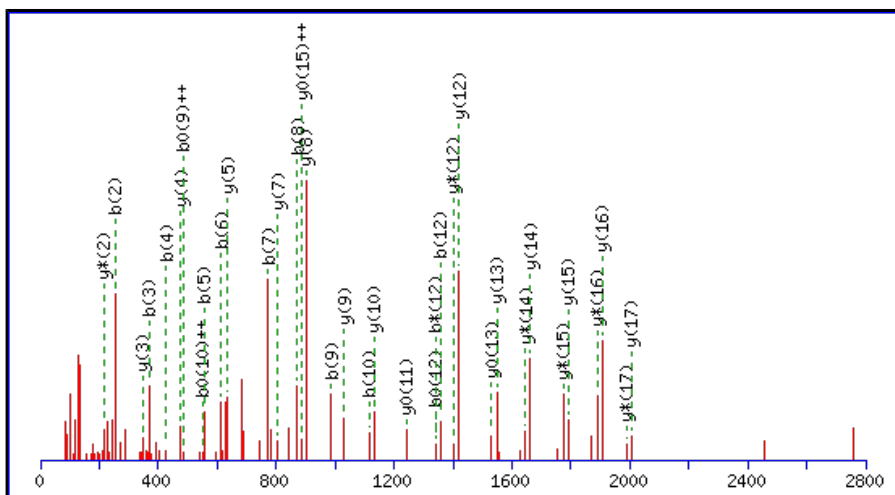

Monoisotopic mass of neutral peptide **Mr(calc): 2776.1599**

Fixed modifications: Carbamidomethyl (C) (apply to specified residues or termini only)

Ions Score: 94 Expect: 5.7e-009

Matches : 36/266 fragment ions using 66 most intense peaks ([help](#))

| #  | b                | b <sup>++</sup> | b <sup>*</sup>   | b <sup>*++</sup> | b <sup>0</sup>   | b <sup>0++</sup> | Seq. | y                | y <sup>++</sup> | y <sup>*</sup>   | y <sup>*++</sup> | y <sup>0</sup>   | y <sup>0++</sup> | #  |
|----|------------------|-----------------|------------------|------------------|------------------|------------------|------|------------------|-----------------|------------------|------------------|------------------|------------------|----|
| 1  | 157.1084         | 79.0578         | 140.0818         | 70.5446          |                  |                  | R    |                  |                 |                  |                  |                  |                  | 24 |
| 2  | <b>254.1612</b>  | 127.5842        | 237.1346         | 119.0709         |                  |                  | P    | 2621.0661        | 1311.0367       | 2604.0395        | 1302.5234        | 2603.0555        | 1302.0314        | 23 |
| 3  | <b>369.1881</b>  | 185.0977        | 352.1615         | 176.5844         | 351.1775         | 176.0924         | D    | 2524.0133        | 1262.5103       | 2506.9868        | 1253.9970        | 2506.0028        | 1253.5050        | 22 |
| 4  | <b>426.2096</b>  | 213.6084        | 409.1830         | 205.0951         | 408.1990         | 204.6031         | G    | 2408.9864        | 1204.9968       | 2391.9598        | 1196.4836        | 2390.9758        | 1195.9915        | 21 |
| 5  | <b>555.2522</b>  | 278.1297        | 538.2256         | 269.6164         | 537.2416         | 269.1244         | E    | 2351.9649        | 1176.4861       | 2334.9384        | 1167.9728        | 2333.9544        | 1167.4808        | 20 |
| 6  | <b>612.2736</b>  | 306.6404        | 595.2471         | 298.1272         | 594.2631         | 297.6352         | G    | 2222.9223        | 1111.9648       | 2205.8958        | 1103.4515        | 2204.9118        | 1102.9595        | 19 |
| 7  | <b>772.3043</b>  | 386.6558        | 755.2777         | 378.1425         | 754.2937         | 377.6505         | C    | 2165.9009        | 1083.4541       | 2148.8743        | 1074.9408        | 2147.8903        | 1074.4488        | 18 |
| 8  | <b>871.3727</b>  | 436.1900        | 854.3461         | 427.6767         | 853.3621         | 427.1847         | V    | <b>2005.8702</b> | 1003.4387       | <b>1988.8437</b> | 994.9255         | 1987.8597        | 994.4335         | 17 |
| 9  | <b>986.3996</b>  | 493.7034        | 969.3731         | 485.1902         | 968.3891         | <b>484.6982</b>  | D    | <b>1906.8018</b> | 953.9045        | <b>1889.7753</b> | 945.3913         | 1888.7912        | 944.8993         | 16 |
| 10 | <b>1115.4422</b> | 558.2247        | 1098.4157        | 549.7115         | 1097.4316        | <b>549.2195</b>  | E    | <b>1791.7749</b> | 896.3911        | <b>1774.7483</b> | 887.8778         | 1773.7643        | <b>887.3858</b>  | 15 |
| 11 | 1229.4851        | 615.2462        | 1212.4586        | 606.7329         | 1211.4746        | 606.2409         | N    | <b>1662.7323</b> | 831.8698        | <b>1645.7057</b> | 823.3565         | 1644.7217        | 822.8645         | 14 |
| 12 | <b>1358.5277</b> | 679.7675        | <b>1341.5012</b> | 671.2542         | <b>1340.5172</b> | 670.7622         | E    | <b>1548.6893</b> | 774.8483        | 1531.6628        | 766.3350         | <b>1530.6788</b> | 765.8430         | 13 |
| 13 | 1518.5584        | 759.7828        | 1501.5318        | 751.2696         | 1500.5478        | 750.7775         | C    | <b>1419.6467</b> | 710.3270        | <b>1402.6202</b> | 701.8137         | 1401.6362        | 701.3217         | 12 |
| 14 | 1646.6170        | 823.8121        | 1629.5904        | 815.2988         | 1628.6064        | 814.8068         | Q    | 1259.6161        | 630.3117        | 1242.5895        | 621.7984         | <b>1241.6055</b> | 621.3064         | 11 |
| 15 | 1747.6646        | 874.3360        | 1730.6381        | 865.8227         | 1729.6541        | 865.3307         | T    | <b>1131.5575</b> | 566.2824        | 1114.5310        | 557.7691         | 1113.5470        | 557.2771         | 10 |
| 16 | 1875.7596        | 938.3834        | 1858.7331        | 929.8702         | 1857.7490        | 929.3782         | K    | <b>1030.5098</b> | 515.7586        | 1013.4833        | 507.2453         | 1012.4993        | 506.7533         | 9  |
| 17 | 1972.8124        | 986.9098        | 1955.7858        | 978.3965         | 1954.8018        | 977.9045         | P    | <b>902.4149</b>  | 451.7111        | 885.3883         | 443.1978         | 884.4043         | 442.7058         | 8  |
| 18 | 2029.8338        | 1015.4206       | 2012.8073        | 1006.9073        | 2011.8233        | 1006.4153        | G    | <b>805.3621</b>  | 403.1847        | 788.3356         | 394.6714         | 787.3515         | 394.1794         | 7  |
| 19 | 2142.9179        | 1071.9626       | 2125.8913        | 1063.4493        | 2124.9073        | 1062.9573        | I    | 748.3406         | 374.6740        | 731.3141         | 366.1607         | 730.3301         | 365.6687         | 6  |

|    |           |           |           |           |           |           |   |          |          |          |          |          |          |   |
|----|-----------|-----------|-----------|-----------|-----------|-----------|---|----------|----------|----------|----------|----------|----------|---|
| 20 | 2302.9485 | 1151.9779 | 2285.9220 | 1143.4646 | 2284.9380 | 1142.9726 | C | 635.2566 | 318.1319 | 618.2300 | 309.6187 | 617.2460 | 309.1266 | 5 |
| 21 | 2431.9911 | 1216.4992 | 2414.9646 | 1207.9859 | 2413.9806 | 1207.4939 | E | 475.2259 | 238.1166 | 458.1994 | 229.6033 | 457.2154 | 229.1113 | 4 |
| 22 | 2546.0341 | 1273.5207 | 2529.0075 | 1265.0074 | 2528.0235 | 1264.5154 | N | 346.1833 | 173.5953 | 329.1568 | 165.0820 |          |          | 3 |
| 23 | 2603.0555 | 1302.0314 | 2586.0290 | 1293.5181 | 2585.0450 | 1293.0261 | G | 232.1404 | 116.5738 | 215.1139 | 108.0606 |          |          | 2 |
| 24 |           |           |           |           |           |           | R | 175.1190 | 88.0631  | 158.0924 | 79.5498  |          |          | 1 |

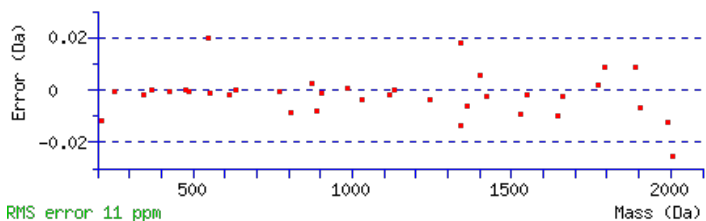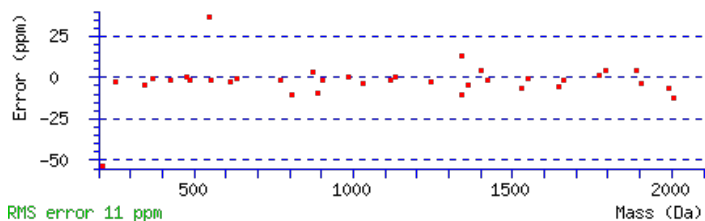

NCBI **BLAST** search of [RPDGEGCVDENECQTKPGICENGR](#)  
 (Parameters: blastp, nr protein database, expect=20000, no filter, PAM30)  
 Other BLAST [web gateways](#)

**All matches to this query**

| Score | Mr(calc)  | Delta  | Sequence                                 |
|-------|-----------|--------|------------------------------------------|
| 94.1  | 2776.1599 | 0.0002 | <a href="#">RPDGEGCVDENECQTKPGICENGR</a> |

Mascot: <http://www.matrixscience.com/>

# Mascot Search Results

## Peptide View

MS/MS Fragmentation of **RPDGEGCVDENECQTKPGICENGR**

Found in **P35555** in **uni\_human\_nr**, FBN1\_HUMAN Fibrillin-1 OS=Homo sapiens GN=FBN1 PE=1 SV=3

Match to Query 11462: 2776.158282 from(926.393370,3+) intensity(3562521.0000) rtinseconds(1131) scans(4585) index(2399)

Title: 130801\_HPL\_Human\_Plaque\_BR1\_TR1\_14\_Spectrum022900\_scans\_4585\_RTINSECONDS=1131

Data file E:\\RAW\\HumanPlaques\\imgf\\T\\1D\\T130801\_HPL\_Human\_Plaque\_BR1\_TR1\_14.mgf

Click mouse within plot area to zoom in by factor of two about that point

Or,  to  Da  
 Label all possible matches  Label matches used for scoring   
 Show Y-axis

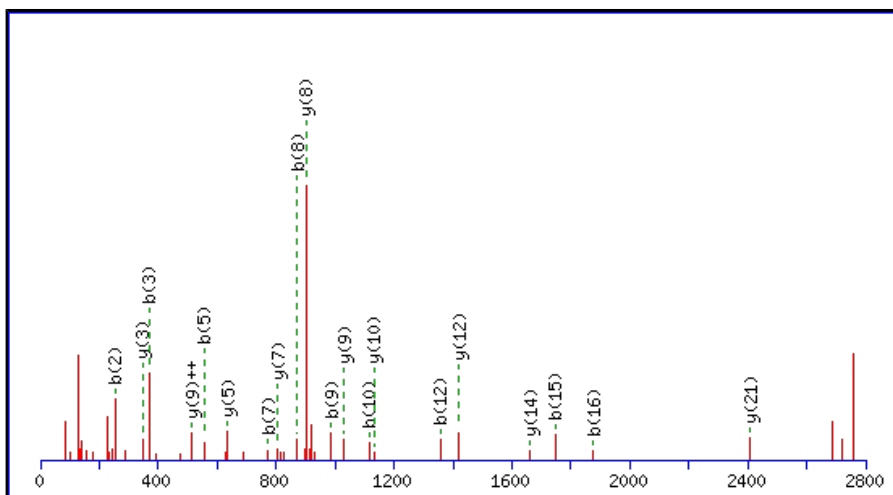

Monoisotopic mass of neutral peptide **Mr(calc): 2776.1599**

Fixed modifications: Carbamidomethyl (C) (apply to specified residues or termini only)

Ions Score: 81 Expect: 1.1e-007

Matches : 20/266 fragment ions using 31 most intense peaks ([help](#))

| #  | b                | b <sup>++</sup> | b <sup>*</sup> | b <sup>*++</sup> | b <sup>0</sup> | b <sup>0++</sup> | Seq. | y                | y <sup>++</sup> | y <sup>*</sup> | y <sup>*++</sup> | y <sup>0</sup> | y <sup>0++</sup> | #  |
|----|------------------|-----------------|----------------|------------------|----------------|------------------|------|------------------|-----------------|----------------|------------------|----------------|------------------|----|
| 1  | 157.1084         | 79.0578         | 140.0818       | 70.5446          |                |                  | R    |                  |                 |                |                  |                |                  | 24 |
| 2  | <b>254.1612</b>  | 127.5842        | 237.1346       | 119.0709         |                |                  | P    | 2621.0661        | 1311.0367       | 2604.0395      | 1302.5234        | 2603.0555      | 1302.0314        | 23 |
| 3  | <b>369.1881</b>  | 185.0977        | 352.1615       | 176.5844         | 351.1775       | 176.0924         | D    | 2524.0133        | 1262.5103       | 2506.9868      | 1253.9970        | 2506.0028      | 1253.5050        | 22 |
| 4  | 426.2096         | 213.6084        | 409.1830       | 205.0951         | 408.1990       | 204.6031         | G    | <b>2408.9864</b> | 1204.9968       | 2391.9598      | 1196.4836        | 2390.9758      | 1195.9915        | 21 |
| 5  | <b>555.2522</b>  | 278.1297        | 538.2256       | 269.6164         | 537.2416       | 269.1244         | E    | 2351.9649        | 1176.4861       | 2334.9384      | 1167.9728        | 2333.9544      | 1167.4808        | 20 |
| 6  | 612.2736         | 306.6404        | 595.2471       | 298.1272         | 594.2631       | 297.6352         | G    | 2222.9223        | 1111.9648       | 2205.8958      | 1103.4515        | 2204.9118      | 1102.9595        | 19 |
| 7  | <b>772.3043</b>  | 386.6558        | 755.2777       | 378.1425         | 754.2937       | 377.6505         | C    | 2165.9009        | 1083.4541       | 2148.8743      | 1074.9408        | 2147.8903      | 1074.4488        | 18 |
| 8  | <b>871.3727</b>  | 436.1900        | 854.3461       | 427.6767         | 853.3621       | 427.1847         | V    | 2005.8702        | 1003.4387       | 1988.8437      | 994.9255         | 1987.8597      | 994.4335         | 17 |
| 9  | <b>986.3996</b>  | 493.7034        | 969.3731       | 485.1902         | 968.3891       | 484.6982         | D    | 1906.8018        | 953.9045        | 1889.7753      | 945.3913         | 1888.7912      | 944.8993         | 16 |
| 10 | <b>1115.4422</b> | 558.2247        | 1098.4157      | 549.7115         | 1097.4316      | 549.2195         | E    | 1791.7749        | 896.3911        | 1774.7483      | 887.8778         | 1773.7643      | 887.3858         | 15 |
| 11 | 1229.4851        | 615.2462        | 1212.4586      | 606.7329         | 1211.4746      | 606.2409         | N    | <b>1662.7323</b> | 831.8698        | 1645.7057      | 823.3565         | 1644.7217      | 822.8645         | 14 |
| 12 | <b>1358.5277</b> | 679.7675        | 1341.5012      | 671.2542         | 1340.5172      | 670.7622         | E    | 1548.6893        | 774.8483        | 1531.6628      | 766.3350         | 1530.6788      | 765.8430         | 13 |
| 13 | 1518.5584        | 759.7828        | 1501.5318      | 751.2696         | 1500.5478      | 750.7775         | C    | <b>1419.6467</b> | 710.3270        | 1402.6202      | 701.8137         | 1401.6362      | 701.3217         | 12 |
| 14 | 1646.6170        | 823.8121        | 1629.5904      | 815.2988         | 1628.6064      | 814.8068         | Q    | 1259.6161        | 630.3117        | 1242.5895      | 621.7984         | 1241.6055      | 621.3064         | 11 |
| 15 | <b>1747.6646</b> | 874.3360        | 1730.6381      | 865.8227         | 1729.6541      | 865.3307         | T    | <b>1131.5575</b> | 566.2824        | 1114.5310      | 557.7691         | 1113.5470      | 557.2771         | 10 |
| 16 | <b>1875.7596</b> | 938.3834        | 1858.7331      | 929.8702         | 1857.7490      | 929.3782         | K    | <b>1030.5098</b> | <b>515.7586</b> | 1013.4833      | 507.2453         | 1012.4993      | 506.7533         | 9  |
| 17 | 1972.8124        | 986.9098        | 1955.7858      | 978.3965         | 1954.8018      | 977.9045         | P    | <b>902.4149</b>  | 451.7111        | 885.3883       | 443.1978         | 884.4043       | 442.7058         | 8  |
| 18 | 2029.8338        | 1015.4206       | 2012.8073      | 1006.9073        | 2011.8233      | 1006.4153        | G    | <b>805.3621</b>  | 403.1847        | 788.3356       | 394.6714         | 787.3515       | 394.1794         | 7  |
| 19 | 2142.9179        | 1071.9626       | 2125.8913      | 1063.4493        | 2124.9073      | 1062.9573        | I    | 748.3406         | 374.6740        | 731.3141       | 366.1607         | 730.3301       | 365.6687         | 6  |



|    |           |           |           |           |           |           |   |          |          |          |          |          |          |   |
|----|-----------|-----------|-----------|-----------|-----------|-----------|---|----------|----------|----------|----------|----------|----------|---|
| 20 | 2302.9485 | 1151.9779 | 2285.9220 | 1143.4646 | 2284.9380 | 1142.9726 | C | 635.2566 | 318.1319 | 618.2300 | 309.6187 | 617.2460 | 309.1266 | 5 |
| 21 | 2431.9911 | 1216.4992 | 2414.9646 | 1207.9859 | 2413.9806 | 1207.4939 | E | 475.2259 | 238.1166 | 458.1994 | 229.6033 | 457.2154 | 229.1113 | 4 |
| 22 | 2546.0341 | 1273.5207 | 2529.0075 | 1265.0074 | 2528.0235 | 1264.5154 | N | 346.1833 | 173.5953 | 329.1568 | 165.0820 |          |          | 3 |
| 23 | 2603.0555 | 1302.0314 | 2586.0290 | 1293.5181 | 2585.0450 | 1293.0261 | G | 232.1404 | 116.5738 | 215.1139 | 108.0606 |          |          | 2 |
| 24 |           |           |           |           |           |           | R | 175.1190 | 88.0631  | 158.0924 | 79.5498  |          |          | 1 |

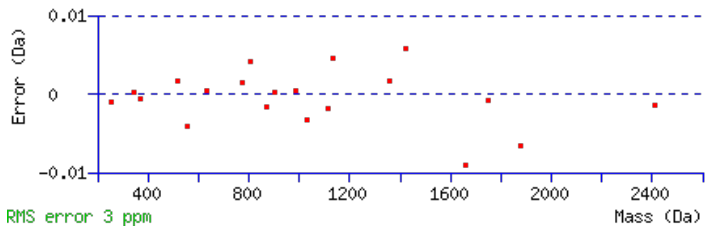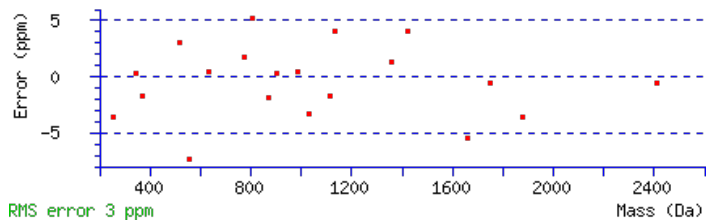

NCBI **BLAST** search of [RPDGEGCVDENECQTKPGICENGR](#)  
 (Parameters: blastp, nr protein database, expect=20000, no filter, PAM30)  
 Other BLAST [web gateways](#)

**All matches to this query**

| Score | Mr(calc)  | Delta   | Sequence                                 |
|-------|-----------|---------|------------------------------------------|
| 81.3  | 2776.1599 | -0.0016 | <a href="#">RPDGEGCVDENECQTKPGICENGR</a> |

Mascot: <http://www.matrixscience.com/>

# Mascot Search Results

## Peptide View

MS/MS Fragmentation of **YCKDINECETPGICMNGR**

Found in **P35555** in **uni\_human\_nr**, FBN1\_HUMAN Fibrillin-1 OS=Homo sapiens GN=FBN1 PE=1 SV=3

Match to Query 8810: 2233.881912 from(745.634580,3+) intensity(367468.1250) rtinseconds(1414) scans(6719) index(4490)

Title: 130806\_HPL\_Human\_Plaque\_BR2\_TR2\_12\_Spectrum025243\_scans\_6719\_RTINSECONDS=1414

Data file E:\\RAW\\HumanPlaques\\mgf\\T\\1D\\T130806\_HPL\_Human\_Plaque\_BR2\_TR2\_12.mgf

Click mouse within plot area to zoom in by factor of two about that point

Or, to Da

Label all possible matches Label matches used for scoring

Show Y-axis

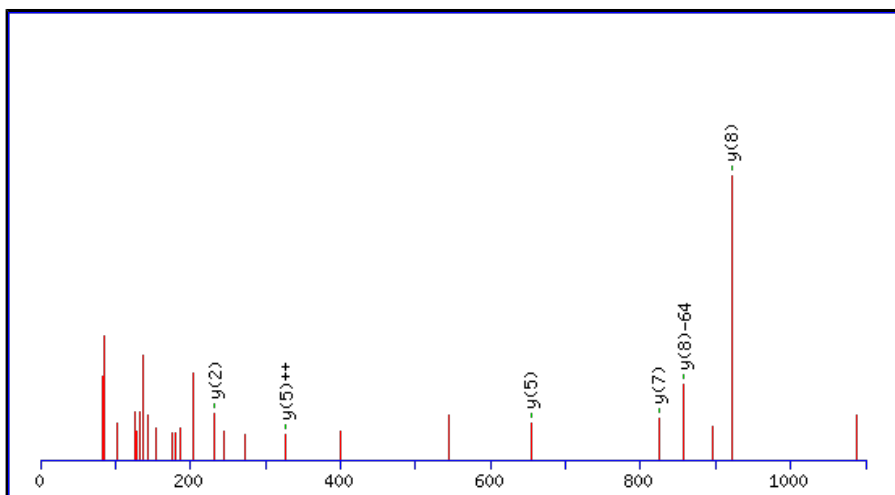

Monoisotopic mass of neutral peptide **Mr(calc):** 2233.8748

**Fixed modifications:** Carbamidomethyl (C) (apply to specified residues or termini only)

**Variable modifications:**

**N6** : Deamidated (NQ)

**M15** : Oxidation (M), with neutral losses 0.0000(shown in table), 63.9983

**N16** : Deamidated (NQ)

**Ions Score:** 17 **Expect:** 0.099

**Matches** : 6/270 fragment ions using 13 most intense peaks ([help](#))

| #  | b         | b <sup>++</sup> | b <sup>*</sup> | b <sup>***</sup> | b <sup>0</sup> | b <sup>0++</sup> | Seq. | y               | y <sup>++</sup> | y <sup>*</sup> | y <sup>***</sup> | y <sup>0</sup> | y <sup>0++</sup> | #  |
|----|-----------|-----------------|----------------|------------------|----------------|------------------|------|-----------------|-----------------|----------------|------------------|----------------|------------------|----|
| 1  | 164.0706  | 82.5389         |                |                  |                |                  | Y    |                 |                 |                |                  |                |                  | 18 |
| 2  | 324.1013  | 162.5543        |                |                  |                |                  | C    | 2071.8188       | 1036.4130       | 2054.7922      | 1027.8998        | 2053.8082      | 1027.4077        | 17 |
| 3  | 452.1962  | 226.6017        | 435.1697       | 218.0885         |                |                  | K    | 1911.7881       | 956.3977        | 1894.7616      | 947.8844         | 1893.7776      | 947.3924         | 16 |
| 4  | 567.2232  | 284.1152        | 550.1966       | 275.6019         | 549.2126       | 275.1099         | D    | 1783.6932       | 892.3502        | 1766.6666      | 883.8369         | 1765.6826      | 883.3449         | 15 |
| 5  | 680.3072  | 340.6573        | 663.2807       | 332.1440         | 662.2967       | 331.6520         | I    | 1668.6662       | 834.8367        | 1651.6397      | 826.3235         | 1650.6557      | 825.8315         | 14 |
| 6  | 795.3342  | 398.1707        | 778.3076       | 389.6574         | 777.3236       | 389.1654         | N    | 1555.5822       | 778.2947        | 1538.5556      | 769.7814         | 1537.5716      | 769.2894         | 13 |
| 7  | 924.3768  | 462.6920        | 907.3502       | 454.1787         | 906.3662       | 453.6867         | E    | 1440.5552       | 720.7812        | 1423.5287      | 712.2680         | 1422.5446      | 711.7760         | 12 |
| 8  | 1084.4074 | 542.7073        | 1067.3809      | 534.1941         | 1066.3968      | 533.7021         | C    | 1311.5126       | 656.2599        | 1294.4861      | 647.7467         | 1293.5021      | 647.2547         | 11 |
| 9  | 1213.4500 | 607.2286        | 1196.4235      | 598.7154         | 1195.4394      | 598.2234         | E    | 1151.4820       | 576.2446        | 1134.4554      | 567.7313         | 1133.4714      | 567.2393         | 10 |
| 10 | 1314.4977 | 657.7525        | 1297.4711      | 649.2392         | 1296.4871      | 648.7472         | T    | 1022.4394       | 511.7233        | 1005.4128      | 503.2101         | 1004.4288      | 502.7180         | 9  |
| 11 | 1411.5504 | 706.2789        | 1394.5239      | 697.7656         | 1393.5399      | 697.2736         | P    | <b>921.3917</b> | 461.1995        | 904.3652       | 452.6862         |                |                  | 8  |
| 12 | 1468.5719 | 734.7896        | 1451.5454      | 726.2763         | 1450.5613      | 725.7843         | G    | <b>824.3389</b> | 412.6731        | 807.3124       | 404.1598         |                |                  | 7  |
| 13 | 1581.6560 | 791.3316        | 1564.6294      | 782.8183         | 1563.6454      | 782.3263         | I    | 767.3175        | 384.1624        | 750.2909       | 375.6491         |                |                  | 6  |
| 14 | 1741.6866 | 871.3469        | 1724.6601      | 862.8337         | 1723.6761      | 862.3417         | C    | <b>654.2334</b> | <b>327.6203</b> | 637.2069       | 319.1071         |                |                  | 5  |
| 15 | 1888.7220 | 944.8646        | 1871.6955      | 936.3514         | 1870.7115      | 935.8594         | M    | 494.2028        | 247.6050        | 477.1762       | 239.0917         |                |                  | 4  |
| 16 | 2003.7490 | 1002.3781       | 1986.7224      | 993.8648         | 1985.7384      | 993.3728         | N    | 347.1674        | 174.0873        | 330.1408       | 165.5740         |                |                  | 3  |
| 17 | 2060.7704 | 1030.8889       | 2043.7439      | 1022.3756        | 2042.7599      | 1021.8836        | G    | <b>232.1404</b> | 116.5738        | 215.1139       | 108.0606         |                |                  | 2  |

|    |  |  |  |  |  |          |          |         |          |         |  |  |          |
|----|--|--|--|--|--|----------|----------|---------|----------|---------|--|--|----------|
| 18 |  |  |  |  |  | <b>R</b> | 175.1190 | 88.0631 | 158.0924 | 79.5498 |  |  | <b>1</b> |
|----|--|--|--|--|--|----------|----------|---------|----------|---------|--|--|----------|

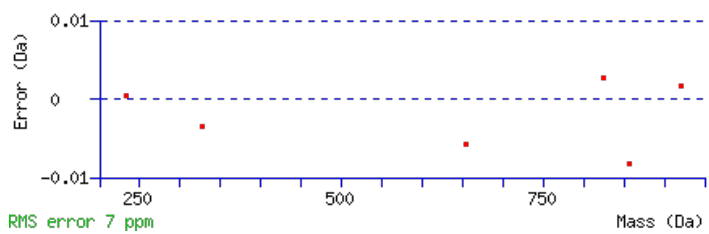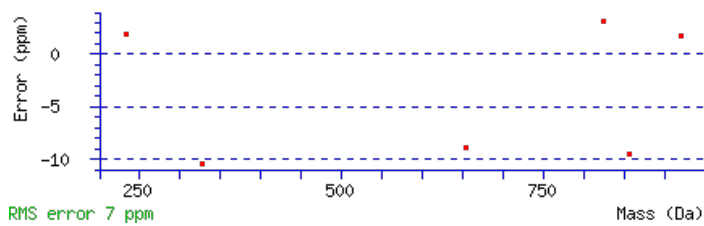

NCBI **BLAST** search of [YCKDINECETPGICMNGR](#)  
 (Parameters: blastp, nr protein database, expect=20000, no filter, PAM30)  
 Other BLAST [web gateways](#)

**All matches to this query**

| Score | Mr(calc)  | Delta  | Sequence                           |
|-------|-----------|--------|------------------------------------|
| 16.8  | 2233.8748 | 0.0071 | <a href="#">YCKDINECETPGICMNGR</a> |

**Mascot:** <http://www.matrixscience.com/>

# Mascot Search Results

## Peptide View

MS/MS Fragmentation of **YCKDINECETPGICMNGR**

Found in **P35555** in **uni\_human\_nr**, FBN1\_HUMAN Fibrillin-1 OS=Homo sapiens GN=FBN1 PE=1 SV=3

Match to Query 8707: 2232.891132 from(745.304320,3+) intensity(1353067.5000) rtinseconds(1436) scans(6745) index(4439)

Title: 130809\_HPL\_Human\_Plaque\_BR1\_TR3\_15\_Spectrum024826\_scans\_6745\_RTINSECONDS=1436

Data file E:\\RAW\\HumanPlaques\\imgf\\T\\1D\\T130809\_HPL\_Human\_Plaque\_BR1\_TR3\_15.mgf

Click mouse within plot area to zoom in by factor of two about that point

Or,  to  Da  
 Label all possible matches  Label matches used for scoring   
 Show Y-axis

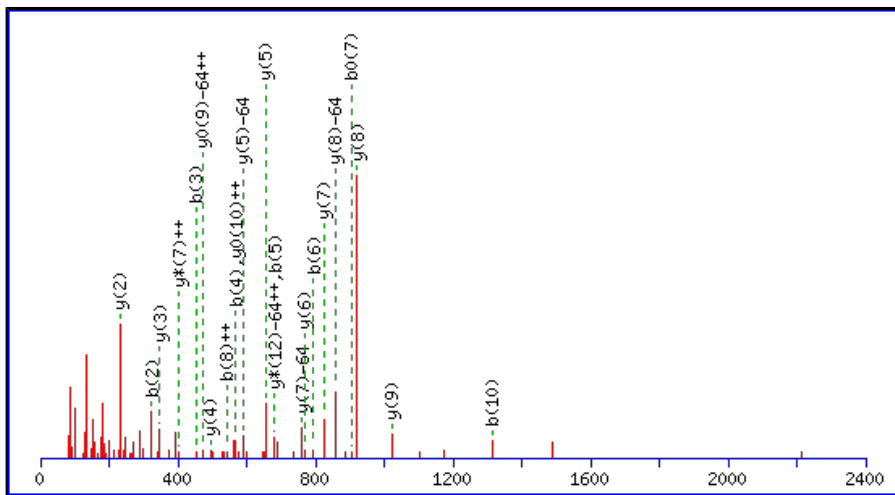

Monoisotopic mass of neutral peptide **Mr(calc)**: 2232.8908

Fixed modifications: Carbamidomethyl (C) (apply to specified residues or termini only)

Variable modifications:

M15 : Oxidation (M), with neutral losses 0.0000(shown in table), 63.9983

N16 : Deamidated (NQ)

Ions Score: 53 Expect: 3.6e-005

Matches : 23/270 fragment ions using 44 most intense peaks ([help](#))

| #  | b                | b <sup>++</sup> | b <sup>*</sup> | b <sup>***</sup> | b <sup>0</sup>  | b <sup>0++</sup> | Seq. | y                | y <sup>++</sup> | y <sup>*</sup> | y <sup>***</sup> | y <sup>0</sup> | y <sup>0++</sup> | #  |
|----|------------------|-----------------|----------------|------------------|-----------------|------------------|------|------------------|-----------------|----------------|------------------|----------------|------------------|----|
| 1  | 164.0706         | 82.5389         |                |                  |                 |                  | Y    |                  |                 |                |                  |                |                  | 18 |
| 2  | <b>324.1013</b>  | 162.5543        |                |                  |                 |                  | C    | 2070.8348        | 1035.9210       | 2053.8082      | 1027.4077        | 2052.8242      | 1026.9157        | 17 |
| 3  | <b>452.1962</b>  | 226.6017        | 435.1697       | 218.0885         |                 |                  | K    | 1910.8041        | 955.9057        | 1893.7776      | 947.3924         | 1892.7935      | 946.9004         | 16 |
| 4  | <b>567.2232</b>  | 284.1152        | 550.1966       | 275.6019         | 549.2126        | 275.1099         | D    | 1782.7091        | 891.8582        | 1765.6826      | 883.3449         | 1764.6986      | 882.8529         | 15 |
| 5  | <b>680.3072</b>  | 340.6573        | 663.2807       | 332.1440         | 662.2967        | 331.6520         | I    | 1667.6822        | 834.3447        | 1650.6557      | 825.8315         | 1649.6716      | 825.3395         | 14 |
| 6  | <b>794.3502</b>  | 397.6787        | 777.3236       | 389.1654         | 776.3396        | 388.6734         | N    | 1554.5981        | 777.8027        | 1537.5716      | 769.2894         | 1536.5876      | 768.7974         | 13 |
| 7  | 923.3927         | 462.2000        | 906.3662       | 453.6867         | <b>905.3822</b> | 453.1947         | E    | 1440.5552        | 720.7812        | 1423.5287      | 712.2680         | 1422.5446      | 711.7760         | 12 |
| 8  | 1083.4234        | <b>542.2153</b> | 1066.3968      | 533.7021         | 1065.4128       | 533.2101         | C    | 1311.5126        | 656.2599        | 1294.4861      | 647.7467         | 1293.5021      | 647.2547         | 11 |
| 9  | 1212.4660        | 606.7366        | 1195.4394      | 598.2234         | 1194.4554       | 597.7313         | E    | 1151.4820        | 576.2446        | 1134.4554      | 567.7313         | 1133.4714      | <b>567.2393</b>  | 10 |
| 10 | <b>1313.5137</b> | 657.2605        | 1296.4871      | 648.7472         | 1295.5031       | 648.2552         | T    | <b>1022.4394</b> | 511.7233        | 1005.4128      | 503.2101         | 1004.4288      | 502.7180         | 9  |
| 11 | 1410.5664        | 705.7869        | 1393.5399      | 697.2736         | 1392.5559       | 696.7816         | P    | <b>921.3917</b>  | 461.1995        | 904.3652       | 452.6862         |                |                  | 8  |
| 12 | 1467.5879        | 734.2976        | 1450.5613      | 725.7843         | 1449.5773       | 725.2923         | G    | <b>824.3389</b>  | 412.6731        | 807.3124       | <b>404.1598</b>  |                |                  | 7  |
| 13 | 1580.6720        | 790.8396        | 1563.6454      | 782.3263         | 1562.6614       | 781.8343         | I    | <b>767.3175</b>  | 384.1624        | 750.2909       | 375.6491         |                |                  | 6  |
| 14 | 1740.7026        | 870.8549        | 1723.6761      | 862.3417         | 1722.6920       | 861.8497         | C    | <b>654.2334</b>  | 327.6203        | 637.2069       | 319.1071         |                |                  | 5  |
| 15 | 1887.7380        | 944.3726        | 1870.7115      | 935.8594         | 1869.7274       | 935.3674         | M    | <b>494.2028</b>  | 247.6050        | 477.1762       | 239.0917         |                |                  | 4  |
| 16 | 2002.7649        | 1001.8861       | 1985.7384      | 993.3728         | 1984.7544       | 992.8808         | N    | <b>347.1674</b>  | 174.0873        | 330.1408       | 165.5740         |                |                  | 3  |
| 17 | 2059.7864        | 1030.3968       | 2042.7599      | 1021.8836        | 2041.7758       | 1021.3916        | G    | <b>232.1404</b>  | 116.5738        | 215.1139       | 108.0606         |                |                  | 2  |

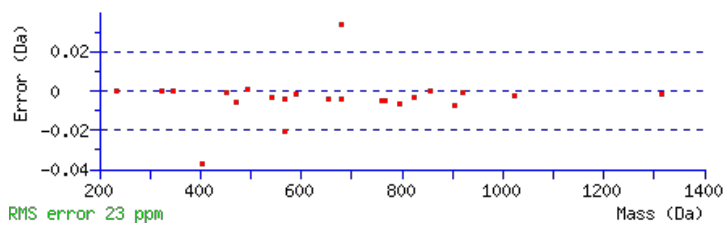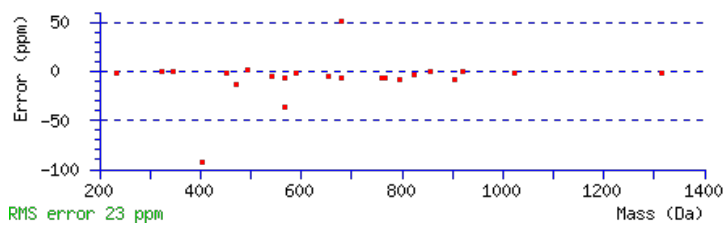

NCBI BLAST search of [YCKDINECETPGICMNGR](#)  
 (Parameters: blastp, nr protein database, expect=20000, no filter, PAM30)  
 Other BLAST [web gateways](#)

All matches to this query

| Score | Mr(calc)  | Delta  | Sequence                           |
|-------|-----------|--------|------------------------------------|
| 53.1  | 2232.8908 | 0.0003 | <a href="#">YCKDINECETPGICMNGR</a> |

Mascot: <http://www.matrixscience.com/>

# Mascot Search Results

## Peptide View

MS/MS Fragmentation of **YCKDINECETPGICMNGR**

Found in **P35555** in **uni\_human\_nr**, FBN1\_HUMAN Fibrillin-1 OS=Homo sapiens GN=FBN1 PE=1 SV=3

Match to Query 10192: 2231.904372 from(744.975400,3+) intensity(3055518.7500) rtinseconds(1327) scans(6411) index(4299)

Title: 130806\_HPL\_Human\_Plaque\_BR1\_TR2\_07\_Spectrum026270\_scans\_6411\_RTINSECONDS=1327

Data file E:\\RAW\\HumanPlaques\\imgf\\T\\1D\\T130806\_HPL\_Human\_Plaque\_BR1\_TR2\_07.mgf

Click mouse within plot area to zoom in by factor of two about that point

Or, to Da  
 Label all possible matches Label matches used for scoring  
 Show Y-axis

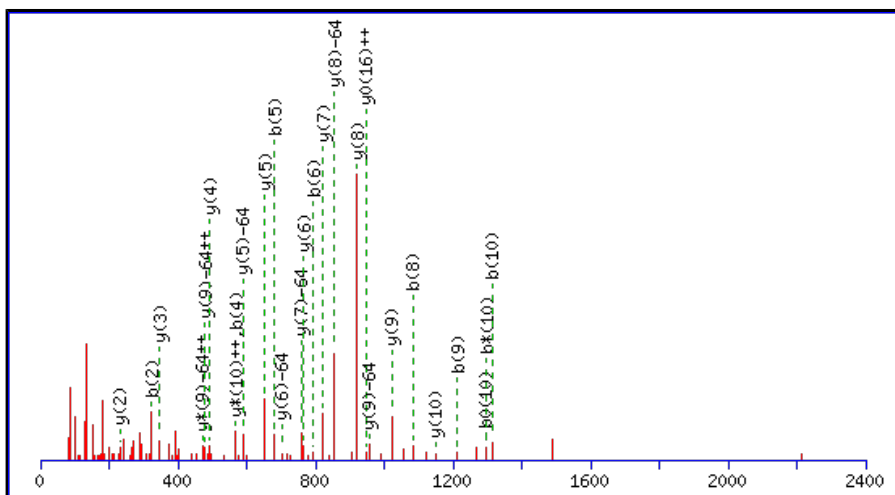

Monoisotopic mass of neutral peptide Mr(calc): 2231.9068

Fixed modifications: Carbamidomethyl (C) (apply to specified residues or termini only)

Variable modifications:

M15 : Oxidation (M), with neutral losses 0.0000(shown in table), 63.9983

Ions Score: 57 Expect: 1.8e-005

Matches : 27/270 fragment ions using 51 most intense peaks ([help](#))

| #  | b                | b <sup>++</sup> | b <sup>*</sup>   | b <sup>*++</sup> | b <sup>0</sup>   | b <sup>0++</sup> | Seq. | y                | y <sup>++</sup> | y <sup>*</sup> | y <sup>*++</sup> | y <sup>0</sup> | y <sup>0++</sup> | #  |
|----|------------------|-----------------|------------------|------------------|------------------|------------------|------|------------------|-----------------|----------------|------------------|----------------|------------------|----|
| 1  | 164.0706         | 82.5389         |                  |                  |                  |                  | Y    |                  |                 |                |                  |                |                  | 18 |
| 2  | <b>324.1013</b>  | 162.5543        |                  |                  |                  |                  | C    | 2069.8507        | 1035.4290       | 2052.8242      | 1026.9157        | 2051.8402      | 1026.4237        | 17 |
| 3  | 452.1962         | 226.6017        | 435.1697         | 218.0885         |                  |                  | K    | 1909.8201        | 955.4137        | 1892.7935      | 946.9004         | 1891.8095      | <b>946.4084</b>  | 16 |
| 4  | <b>567.2232</b>  | 284.1152        | 550.1966         | 275.6019         | 549.2126         | 275.1099         | D    | 1781.7251        | 891.3662        | 1764.6986      | 882.8529         | 1763.7146      | 882.3609         | 15 |
| 5  | <b>680.3072</b>  | 340.6573        | 663.2807         | 332.1440         | 662.2967         | 331.6520         | I    | 1666.6982        | 833.8527        | 1649.6716      | 825.3395         | 1648.6876      | 824.8474         | 14 |
| 6  | <b>794.3502</b>  | 397.6787        | 777.3236         | 389.1654         | 776.3396         | 388.6734         | N    | 1553.6141        | 777.3107        | 1536.5876      | 768.7974         | 1535.6036      | 768.3054         | 13 |
| 7  | 923.3927         | 462.2000        | 906.3662         | 453.6867         | 905.3822         | 453.1947         | E    | 1439.5712        | 720.2892        | 1422.5446      | 711.7760         | 1421.5606      | 711.2840         | 12 |
| 8  | <b>1083.4234</b> | 542.2153        | 1066.3968        | 533.7021         | 1065.4128        | 533.2101         | C    | 1310.5286        | 655.7679        | 1293.5021      | 647.2547         | 1292.5180      | 646.7627         | 11 |
| 9  | <b>1212.4660</b> | 606.7366        | 1195.4394        | 598.2234         | 1194.4554        | 597.7313         | E    | <b>1150.4980</b> | 575.7526        | 1133.4714      | <b>567.2393</b>  | 1132.4874      | 566.7473         | 10 |
| 10 | <b>1313.5137</b> | 657.2605        | <b>1296.4871</b> | 648.7472         | <b>1295.5031</b> | 648.2552         | T    | <b>1021.4554</b> | 511.2313        | 1004.4288      | 502.7180         | 1003.4448      | 502.2260         | 9  |
| 11 | 1410.5664        | 705.7869        | 1393.5399        | 697.2736         | 1392.5559        | 696.7816         | P    | <b>920.4077</b>  | 460.7075        | 903.3811       | 452.1942         |                |                  | 8  |
| 12 | 1467.5879        | 734.2976        | 1450.5613        | 725.7843         | 1449.5773        | 725.2923         | G    | <b>823.3549</b>  | 412.1811        | 806.3284       | 403.6678         |                |                  | 7  |
| 13 | 1580.6720        | 790.8396        | 1563.6454        | 782.3263         | 1562.6614        | 781.8343         | I    | <b>766.3335</b>  | 383.6704        | 749.3069       | 375.1571         |                |                  | 6  |
| 14 | 1740.7026        | 870.8549        | 1723.6761        | 862.3417         | 1722.6920        | 861.8497         | C    | <b>653.2494</b>  | 327.1283        | 636.2228       | 318.6151         |                |                  | 5  |
| 15 | 1887.7380        | 944.3726        | 1870.7115        | 935.8594         | 1869.7274        | 935.3674         | M    | <b>493.2187</b>  | 247.1130        | 476.1922       | 238.5997         |                |                  | 4  |
| 16 | 2001.7809        | 1001.3941       | 1984.7544        | 992.8808         | 1983.7704        | 992.3888         | N    | <b>346.1833</b>  | 173.5953        | 329.1568       | 165.0820         |                |                  | 3  |
| 17 | 2058.8024        | 1029.9048       | 2041.7758        | 1021.3916        | 2040.7918        | 1020.8996        | G    | <b>232.1404</b>  | 116.5738        | 215.1139       | 108.0606         |                |                  | 2  |
| 18 |                  |                 |                  |                  |                  |                  | R    | 175.1190         | 88.0631         | 158.0924       | 79.5498          |                |                  | 1  |

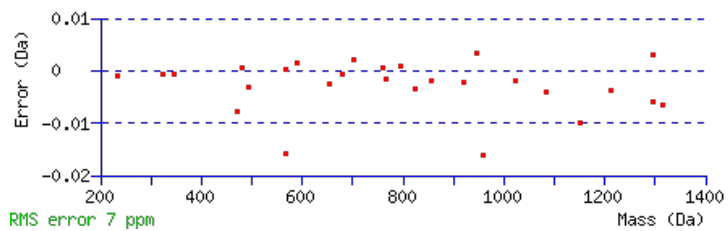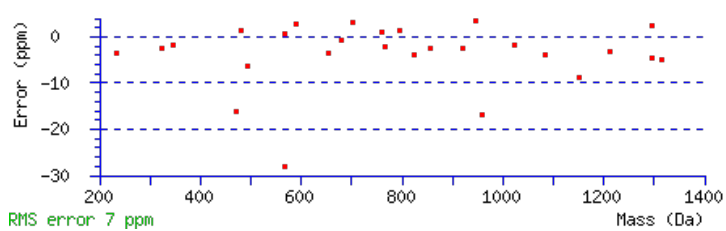

NCBI **BLAST** search of [YCKDINECETPGICMNGR](#)

(Parameters: blastp, nr protein database, expect=20000, no filter, PAM30)

Other BLAST [web gateways](#)

**All matches to this query**

| Score | Mr(calc)  | Delta   | Sequence                           |
|-------|-----------|---------|------------------------------------|
| 57.2  | 2231.9068 | -0.0024 | <a href="#">YCKDINECETPGICMNGR</a> |

Mascot: <http://www.matrixscience.com/>

# Mascot Search Results

## Peptide View

MS/MS Fragmentation of **YCKDINECETPGICMNGR**

Found in **P35555** in **uni\_human\_nr**, FBN1\_HUMAN Fibrillin-1 OS=Homo sapiens GN=FBN1 PE=1 SV=3

Match to Query 8119: 2216.897802 from(739.973210,3+) intensity(760192.0625) rtinseconds(1673) scans(8242) index(5654)

Title: 130801\_HPL\_Human\_Plaque\_BR2\_TR1\_13\_Spectrum025983\_scans\_8242\_RTINSECONDS=1673

Data file E:\\RAW\\HumanPlaques\\imgf\\T\\1D\\T130801\_HPL\_Human\_Plaque\_BR2\_TR1\_13.mgf

Click mouse within plot area to zoom in by factor of two about that point

Or,  to  Da

Label all possible matches  Label matches used for scoring

Show Y-axis

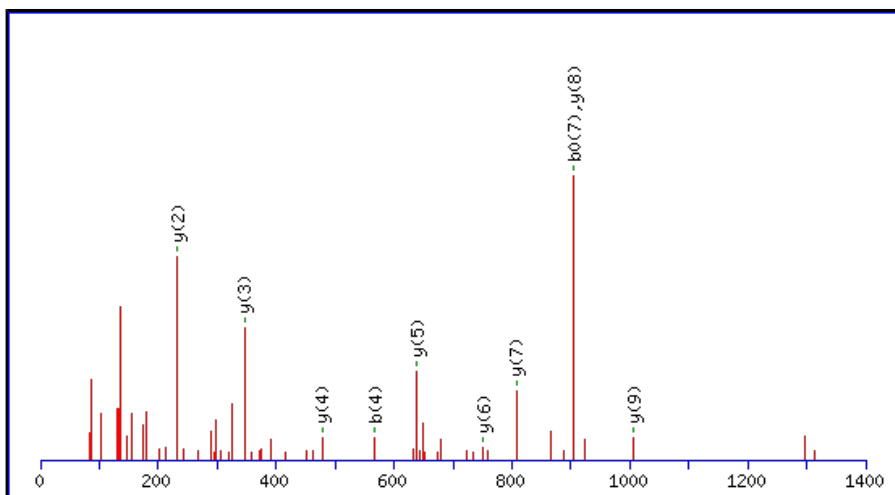

Monoisotopic mass of neutral peptide Mr(calc): 2216.8959

Fixed modifications: Carbamidomethyl (C) (apply to specified residues or termini only)

Variable modifications:

N16 : Deamidated (NQ)

Ions Score: 65 Expect: 2.9e-006

Matches : 10/178 fragment ions using 11 most intense peaks ([help](#))

| #  | b               | b <sup>++</sup> | b <sup>*</sup> | b <sup>***</sup> | b <sup>0</sup>  | b <sup>0++</sup> | Seq. | y                | y <sup>++</sup> | y <sup>*</sup> | y <sup>***</sup> | y <sup>0</sup> | y <sup>0++</sup> | #  |
|----|-----------------|-----------------|----------------|------------------|-----------------|------------------|------|------------------|-----------------|----------------|------------------|----------------|------------------|----|
| 1  | 164.0706        | 82.5389         |                |                  |                 |                  | Y    |                  |                 |                |                  |                |                  | 18 |
| 2  | 324.1013        | 162.5543        |                |                  |                 |                  | C    | 2054.8398        | 1027.9236       | 2037.8133      | 1019.4103        | 2036.8293      | 1018.9183        | 17 |
| 3  | 452.1962        | 226.6017        | 435.1697       | 218.0885         |                 |                  | K    | 1894.8092        | 947.9082        | 1877.7826      | 939.3950         | 1876.7986      | 938.9030         | 16 |
| 4  | <b>567.2232</b> | 284.1152        | 550.1966       | 275.6019         | 549.2126        | 275.1099         | D    | 1766.7142        | 883.8608        | 1749.6877      | 875.3475         | 1748.7037      | 874.8555         | 15 |
| 5  | 680.3072        | 340.6573        | 663.2807       | 332.1440         | 662.2967        | 331.6520         | I    | 1651.6873        | 826.3473        | 1634.6607      | 817.8340         | 1633.6767      | 817.3420         | 14 |
| 6  | 794.3502        | 397.6787        | 777.3236       | 389.1654         | 776.3396        | 388.6734         | N    | 1538.6032        | 769.8053        | 1521.5767      | 761.2920         | 1520.5927      | 760.8000         | 13 |
| 7  | 923.3927        | 462.2000        | 906.3662       | 453.6867         | <b>905.3822</b> | 453.1947         | E    | 1424.5603        | 712.7838        | 1407.5338      | 704.2705         | 1406.5497      | 703.7785         | 12 |
| 8  | 1083.4234       | 542.2153        | 1066.3968      | 533.7021         | 1065.4128       | 533.2101         | C    | 1295.5177        | 648.2625        | 1278.4912      | 639.7492         | 1277.5071      | 639.2572         | 11 |
| 9  | 1212.4660       | 606.7366        | 1195.4394      | 598.2234         | 1194.4554       | 597.7313         | E    | 1135.4871        | 568.2472        | 1118.4605      | 559.7339         | 1117.4765      | 559.2419         | 10 |
| 10 | 1313.5137       | 657.2605        | 1296.4871      | 648.7472         | 1295.5031       | 648.2552         | T    | <b>1006.4445</b> | 503.7259        | 989.4179       | 495.2126         | 988.4339       | 494.7206         | 9  |
| 11 | 1410.5664       | 705.7869        | 1393.5399      | 697.2736         | 1392.5559       | 696.7816         | P    | <b>905.3968</b>  | 453.2020        | 888.3702       | 444.6888         |                |                  | 8  |
| 12 | 1467.5879       | 734.2976        | 1450.5613      | 725.7843         | 1449.5773       | 725.2923         | G    | <b>808.3440</b>  | 404.6756        | 791.3175       | 396.1624         |                |                  | 7  |
| 13 | 1580.6720       | 790.8396        | 1563.6454      | 782.3263         | 1562.6614       | 781.8343         | I    | <b>751.3226</b>  | 376.1649        | 734.2960       | 367.6516         |                |                  | 6  |
| 14 | 1740.7026       | 870.8549        | 1723.6761      | 862.3417         | 1722.6920       | 861.8497         | C    | <b>638.2385</b>  | 319.6229        | 621.2119       | 311.1096         |                |                  | 5  |
| 15 | 1871.7431       | 936.3752        | 1854.7165      | 927.8619         | 1853.7325       | 927.3699         | M    | <b>478.2078</b>  | 239.6076        | 461.1813       | 231.0943         |                |                  | 4  |
| 16 | 1986.7700       | 993.8887        | 1969.7435      | 985.3754         | 1968.7595       | 984.8834         | N    | <b>347.1674</b>  | 174.0873        | 330.1408       | 165.5740         |                |                  | 3  |
| 17 | 2043.7915       | 1022.3994       | 2026.7649      | 1013.8861        | 2025.7809       | 1013.3941        | G    | <b>232.1404</b>  | 116.5738        | 215.1139       | 108.0606         |                |                  | 2  |
| 18 |                 |                 |                |                  |                 |                  | R    | 175.1190         | 88.0631         | 158.0924       | 79.5498          |                |                  | 1  |



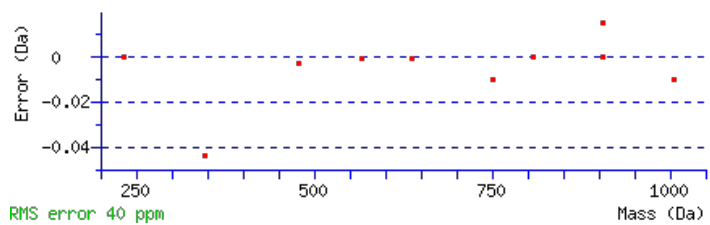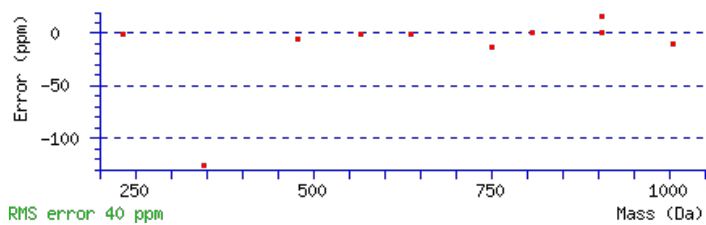

NCBI **BLAST** search of [YCKDINECETPGICMNGR](#)

(Parameters: blastp, nr protein database, expect=20000, no filter, PAM30)

Other BLAST [web gateways](#)

**All matches to this query**

| Score | Mr(calc)  | Delta  | Sequence                           |
|-------|-----------|--------|------------------------------------|
| 64.6  | 2216.8959 | 0.0019 | <a href="#">YCKDINECETPGICMNGR</a> |

Mascot: <http://www.matrixscience.com/>

# Mascot Search Results

## Peptide View

MS/MS Fragmentation of **YCKDINECETPGICMNGR**

Found in **P35555** in **uni\_human\_nr**, FBN1\_HUMAN Fibrillin-1 OS=Homo sapiens GN=FBN1 PE=1 SV=3

Match to Query 9988: 2215.911042 from(739.644290,3+) intensity(12788484.0000) rtinseconds(1559) scans(8115) index(5743)

Title: 130801\_HPL\_Human\_Plaque\_BR1\_TR1\_06\_Spectrum027788\_scans\_8115\_RTINSECONDS=1559

Data file E:\\RAW\\HumanPlaques\\imgf\\T\\1D\\T130801\_HPL\_Human\_Plaque\_BR1\_TR1\_06.mgf

Click mouse within plot area to zoom in by factor of two about that point

Or,  to  Da  
 Label all possible matches  Label matches used for scoring   
 Show Y-axis

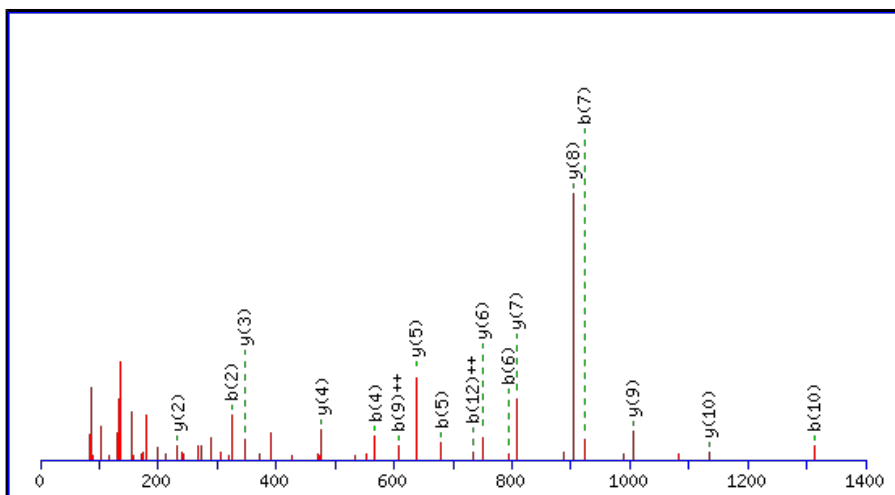

Monoisotopic mass of neutral peptide **Mr(calc):** 2215.9119

**Fixed modifications:** Carbamidomethyl (C) (apply to specified residues or termini only)

**Ions Score:** 69 **Expect:** 1.5e-006

**Matches :** 17/178 fragment ions using 32 most intense peaks ([help](#))

| #  | b                | b <sup>++</sup> | b <sup>*</sup> | b <sup>*++</sup> | b <sup>0</sup> | b <sup>0++</sup> | Seq. | y                | y <sup>++</sup> | y <sup>*</sup> | y <sup>*++</sup> | y <sup>0</sup> | y <sup>0++</sup> | #  |
|----|------------------|-----------------|----------------|------------------|----------------|------------------|------|------------------|-----------------|----------------|------------------|----------------|------------------|----|
| 1  | 164.0706         | 82.5389         |                |                  |                |                  | Y    |                  |                 |                |                  |                |                  | 18 |
| 2  | <b>324.1013</b>  | 162.5543        |                |                  |                |                  | C    | 2053.8558        | 1027.4316       | 2036.8293      | 1018.9183        | 2035.8453      | 1018.4263        | 17 |
| 3  | 452.1962         | 226.6017        | 435.1697       | 218.0885         |                |                  | K    | 1893.8252        | 947.4162        | 1876.7986      | 938.9030         | 1875.8146      | 938.4109         | 16 |
| 4  | <b>567.2232</b>  | 284.1152        | 550.1966       | 275.6019         | 549.2126       | 275.1099         | D    | 1765.7302        | 883.3687        | 1748.7037      | 874.8555         | 1747.7197      | 874.3635         | 15 |
| 5  | <b>680.3072</b>  | 340.6573        | 663.2807       | 332.1440         | 662.2967       | 331.6520         | I    | 1650.7033        | 825.8553        | 1633.6767      | 817.3420         | 1632.6927      | 816.8500         | 14 |
| 6  | <b>794.3502</b>  | 397.6787        | 777.3236       | 389.1654         | 776.3396       | 388.6734         | N    | 1537.6192        | 769.3132        | 1520.5927      | 760.8000         | 1519.6086      | 760.3080         | 13 |
| 7  | <b>923.3927</b>  | 462.2000        | 906.3662       | 453.6867         | 905.3822       | 453.1947         | E    | 1423.5763        | 712.2918        | 1406.5497      | 703.7785         | 1405.5657      | 703.2865         | 12 |
| 8  | 1083.4234        | 542.2153        | 1066.3968      | 533.7021         | 1065.4128      | 533.2101         | C    | 1294.5337        | 647.7705        | 1277.5071      | 639.2572         | 1276.5231      | 638.7652         | 11 |
| 9  | 1212.4660        | <b>606.7366</b> | 1195.4394      | 598.2234         | 1194.4554      | 597.7313         | E    | <b>1134.5030</b> | 567.7552        | 1117.4765      | 559.2419         | 1116.4925      | 558.7499         | 10 |
| 10 | <b>1313.5137</b> | 657.2605        | 1296.4871      | 648.7472         | 1295.5031      | 648.2552         | T    | <b>1005.4604</b> | 503.2339        | 988.4339       | 494.7206         | 987.4499       | 494.2286         | 9  |
| 11 | 1410.5664        | 705.7869        | 1393.5399      | 697.2736         | 1392.5559      | 696.7816         | P    | <b>904.4128</b>  | 452.7100        | 887.3862       | 444.1967         |                |                  | 8  |
| 12 | 1467.5879        | <b>734.2976</b> | 1450.5613      | 725.7843         | 1449.5773      | 725.2923         | G    | <b>807.3600</b>  | 404.1836        | 790.3335       | 395.6704         |                |                  | 7  |
| 13 | 1580.6720        | 790.8396        | 1563.6454      | 782.3263         | 1562.6614      | 781.8343         | I    | <b>750.3385</b>  | 375.6729        | 733.3120       | 367.1596         |                |                  | 6  |
| 14 | 1740.7026        | 870.8549        | 1723.6761      | 862.3417         | 1722.6920      | 861.8497         | C    | <b>637.2545</b>  | 319.1309        | 620.2279       | 310.6176         |                |                  | 5  |
| 15 | 1871.7431        | 936.3752        | 1854.7165      | 927.8619         | 1853.7325      | 927.3699         | M    | <b>477.2238</b>  | 239.1156        | 460.1973       | 230.6023         |                |                  | 4  |
| 16 | 1985.7860        | 993.3966        | 1968.7595      | 984.8834         | 1967.7755      | 984.3914         | N    | <b>346.1833</b>  | 173.5953        | 329.1568       | 165.0820         |                |                  | 3  |
| 17 | 2042.8075        | 1021.9074       | 2025.7809      | 1013.3941        | 2024.7969      | 1012.9021        | G    | <b>232.1404</b>  | 116.5738        | 215.1139       | 108.0606         |                |                  | 2  |
| 18 |                  |                 |                |                  |                |                  | R    | 175.1190         | 88.0631         | 158.0924       | 79.5498          |                |                  | 1  |

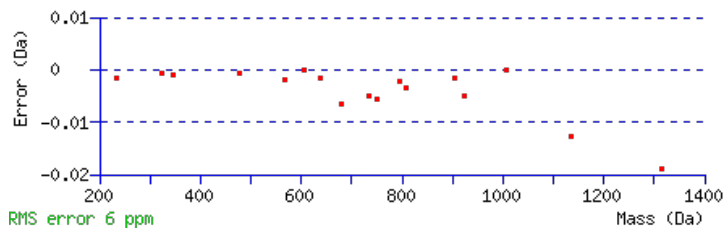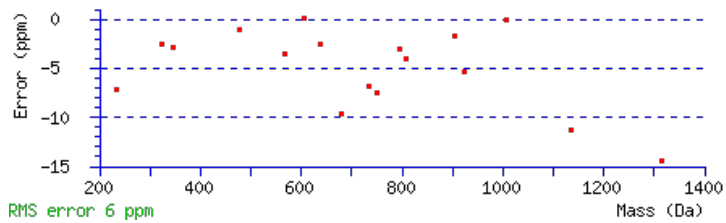

NCBI BLAST search of [YCKDINECETPGICMNGR](#)

(Parameters: blastp, nr protein database, expect=20000, no filter, PAM30)

Other BLAST [web gateways](#)

**All matches to this query**

| Score | Mr(calc)  | Delta   | Sequence                           |
|-------|-----------|---------|------------------------------------|
| 68.8  | 2215.9119 | -0.0008 | <a href="#">YCKDINECETPGICMNGR</a> |

Mascot: <http://www.matrixscience.com/>

# Mascot Search Results

## Peptide View

MS/MS Fragmentation of **YCKDINECETPGICMNGR**

Found in **P35555** in **uni\_human\_nr**, FBN1\_HUMAN Fibrillin-1 OS=Homo sapiens GN=FBN1 PE=1 SV=3

Match to Query 10404: 2215.910008 from(1108.962280,2+) intensity(894131.5625) rtinseconds(1585) scans(8500) index(6186)

Title: 130809\_HPL\_Human\_Plaque\_BR1\_TR3\_06\_Spectrum028540\_scans\_8500\_RTINSECONDS=1585

Data file E:\\RAW\\HumanPlaques\\imgf\\T\\1D\\T130809\_HPL\_Human\_Plaque\_BR1\_TR3\_06.mgf

Click mouse within plot area to zoom in by factor of two about that point

Or,  to  Da

Label all possible matches  Label matches used for scoring

Show Y-axis

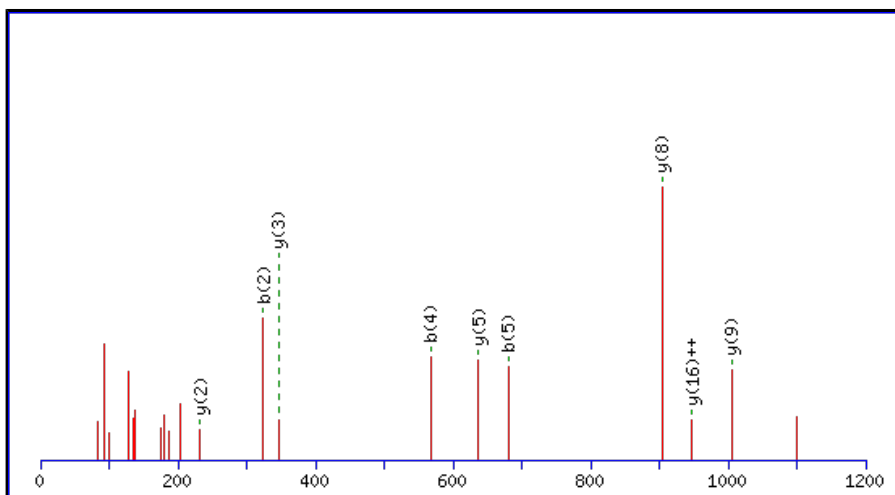

Monoisotopic mass of neutral peptide Mr(calc): 2215.9119

Fixed modifications: Carbamidomethyl (C) (apply to specified residues or termini only)

Ions Score: 39 Expect: 0.0014

Matches : 9/178 fragment ions using 13 most intense peaks ([help](#))

| #  | b               | b <sup>++</sup> | b <sup>*</sup> | b <sup>*++</sup> | b <sup>0</sup> | b <sup>0++</sup> | Seq. | y                | y <sup>++</sup> | y <sup>*</sup> | y <sup>*++</sup> | y <sup>0</sup> | y <sup>0++</sup> | #  |
|----|-----------------|-----------------|----------------|------------------|----------------|------------------|------|------------------|-----------------|----------------|------------------|----------------|------------------|----|
| 1  | 164.0706        | 82.5389         |                |                  |                |                  | Y    |                  |                 |                |                  |                |                  | 18 |
| 2  | <b>324.1013</b> | 162.5543        |                |                  |                |                  | C    | 2053.8558        | 1027.4316       | 2036.8293      | 1018.9183        | 2035.8453      | 1018.4263        | 17 |
| 3  | 452.1962        | 226.6017        | 435.1697       | 218.0885         |                |                  | K    | 1893.8252        | <b>947.4162</b> | 1876.7986      | 938.9030         | 1875.8146      | 938.4109         | 16 |
| 4  | <b>567.2232</b> | 284.1152        | 550.1966       | 275.6019         | 549.2126       | 275.1099         | D    | 1765.7302        | 883.3687        | 1748.7037      | 874.8555         | 1747.7197      | 874.3635         | 15 |
| 5  | <b>680.3072</b> | 340.6573        | 663.2807       | 332.1440         | 662.2967       | 331.6520         | I    | 1650.7033        | 825.8553        | 1633.6767      | 817.3420         | 1632.6927      | 816.8500         | 14 |
| 6  | 794.3502        | 397.6787        | 777.3236       | 389.1654         | 776.3396       | 388.6734         | N    | 1537.6192        | 769.3132        | 1520.5927      | 760.8000         | 1519.6086      | 760.3080         | 13 |
| 7  | 923.3927        | 462.2000        | 906.3662       | 453.6867         | 905.3822       | 453.1947         | E    | 1423.5763        | 712.2918        | 1406.5497      | 703.7785         | 1405.5657      | 703.2865         | 12 |
| 8  | 1083.4234       | 542.2153        | 1066.3968      | 533.7021         | 1065.4128      | 533.2101         | C    | 1294.5337        | 647.7705        | 1277.5071      | 639.2572         | 1276.5231      | 638.7652         | 11 |
| 9  | 1212.4660       | 606.7366        | 1195.4394      | 598.2234         | 1194.4554      | 597.7313         | E    | 1134.5030        | 567.7552        | 1117.4765      | 559.2419         | 1116.4925      | 558.7499         | 10 |
| 10 | 1313.5137       | 657.2605        | 1296.4871      | 648.7472         | 1295.5031      | 648.2552         | T    | <b>1005.4604</b> | 503.2339        | 988.4339       | 494.7206         | 987.4499       | 494.2286         | 9  |
| 11 | 1410.5664       | 705.7869        | 1393.5399      | 697.2736         | 1392.5559      | 696.7816         | P    | <b>904.4128</b>  | 452.7100        | 887.3862       | 444.1967         |                |                  | 8  |
| 12 | 1467.5879       | 734.2976        | 1450.5613      | 725.7843         | 1449.5773      | 725.2923         | G    | 807.3600         | 404.1836        | 790.3335       | 395.6704         |                |                  | 7  |
| 13 | 1580.6720       | 790.8396        | 1563.6454      | 782.3263         | 1562.6614      | 781.8343         | I    | 750.3385         | 375.6729        | 733.3120       | 367.1596         |                |                  | 6  |
| 14 | 1740.7026       | 870.8549        | 1723.6761      | 862.3417         | 1722.6920      | 861.8497         | C    | <b>637.2545</b>  | 319.1309        | 620.2279       | 310.6176         |                |                  | 5  |
| 15 | 1871.7431       | 936.3752        | 1854.7165      | 927.8619         | 1853.7325      | 927.3699         | M    | 477.2238         | 239.1156        | 460.1973       | 230.6023         |                |                  | 4  |
| 16 | 1985.7860       | 993.3966        | 1968.7595      | 984.8834         | 1967.7755      | 984.3914         | N    | <b>346.1833</b>  | 173.5953        | 329.1568       | 165.0820         |                |                  | 3  |
| 17 | 2042.8075       | 1021.9074       | 2025.7809      | 1013.3941        | 2024.7969      | 1012.9021        | G    | <b>232.1404</b>  | 116.5738        | 215.1139       | 108.0606         |                |                  | 2  |
| 18 |                 |                 |                |                  |                |                  | R    | 175.1190         | 88.0631         | 158.0924       | 79.5498          |                |                  | 1  |

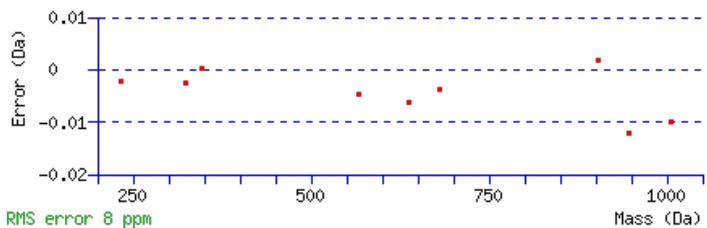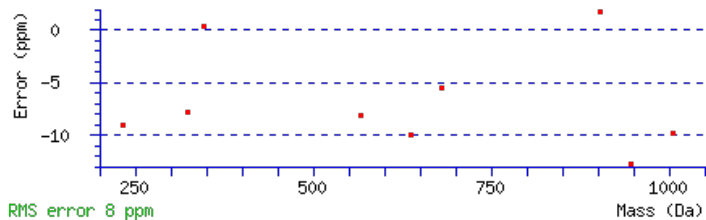

NCBI BLAST search of [YCKDINECETPGICMNGR](#)

(Parameters: blastp, nr protein database, expect=20000, no filter, PAM30)

Other BLAST [web gateways](#)

**All matches to this query**

| Score | Mr(calc)  | Delta   | Sequence                           |
|-------|-----------|---------|------------------------------------|
| 38.9  | 2215.9119 | -0.0019 | <a href="#">YCKDINECETPGICMNGR</a> |

Mascot: <http://www.matrixscience.com/>

# Mascot Search Results

## Peptide View

MS/MS Fragmentation of **FAVLQENVAWGNGR**

Found in **Q9Y6R7** in **uni\_human\_nr**, FCGBP\_HUMAN IgGfc-binding protein OS=Homo sapiens GN=FCGBP PE=1 SV=3

Match to Query 4303: 1561.775128 from(781.894840,2+) intensity(1496454.0000) rtinseconds(2498) scans(14607) index(11303)

Title: 130801\_HPL\_Human\_Plaque\_BR2\_TR1\_06\_Spectrum032797\_scans\_\_14607\_RTINSECONDS=2498

Data file E:\RAW\HumanPlaques\mgf\T\1D\T130801\_HPL\_Human\_Plaque\_BR2\_TR1\_06.mgf

Click mouse within plot area to zoom in by factor of two about that point

Or,  to  Da

Label all possible matches  Label matches used for scoring

Show Y-axis

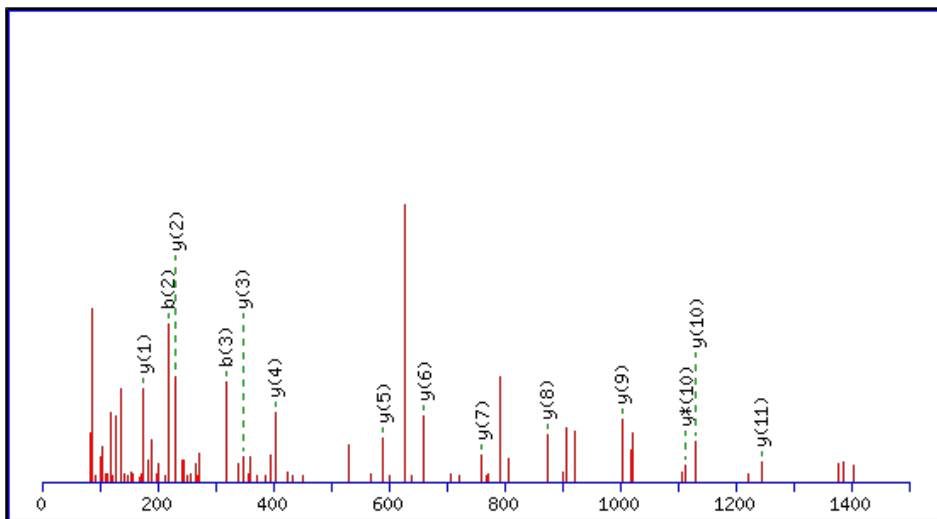

**Monoisotopic mass of neutral peptide Mr(calc):** 1560.7685

**Fixed modifications:** Carbamidomethyl (C) (apply to specified residues or termini only)

**Variable modifications:**

N12 : Deamidated (NQ)

**Ions Score:** 53 **Expect:** 0.00041

**Matches :** 14/122 fragment ions using 44 most intense peaks ([help](#))

| #  | b               | b <sup>++</sup> | b <sup>*</sup> | b <sup>*++</sup> | b <sup>0</sup> | b <sup>0++</sup> | Seq. | y                | y <sup>++</sup> | y <sup>*</sup>   | y <sup>*++</sup> | y <sup>0</sup> | y <sup>0++</sup> | #  |
|----|-----------------|-----------------|----------------|------------------|----------------|------------------|------|------------------|-----------------|------------------|------------------|----------------|------------------|----|
| 1  | 148.0757        | 74.5415         |                |                  |                |                  | F    |                  |                 |                  |                  |                |                  | 14 |
| 2  | <b>219.1128</b> | 110.0600        |                |                  |                |                  | A    | 1414.7074        | 707.8573        | 1397.6808        | 699.3440         | 1396.6968      | 698.8520         | 13 |
| 3  | <b>318.1812</b> | 159.5942        |                |                  |                |                  | V    | 1343.6702        | 672.3388        | 1326.6437        | 663.8255         | 1325.6597      | 663.3335         | 12 |
| 4  | 431.2653        | 216.1363        |                |                  |                |                  | L    | <b>1244.6018</b> | 622.8046        | 1227.5753        | 614.2913         | 1226.5913      | 613.7993         | 11 |
| 5  | 559.3239        | 280.1656        | 542.2973       | 271.6523         |                |                  | Q    | <b>1131.5178</b> | 566.2625        | <b>1114.4912</b> | 557.7492         | 1113.5072      | 557.2572         | 10 |
| 6  | 688.3665        | 344.6869        | 671.3399       | 336.1736         | 670.3559       | 335.6816         | E    | <b>1003.4592</b> | 502.2332        | 986.4326         | 493.7200         | 985.4486       | 493.2279         | 9  |
| 7  | 802.4094        | 401.7083        | 785.3828       | 393.1951         | 784.3988       | 392.7030         | N    | <b>874.4166</b>  | 437.7119        | 857.3900         | 429.1987         |                |                  | 8  |
| 8  | 901.4778        | 451.2425        | 884.4512       | 442.7293         | 883.4672       | 442.2373         | V    | <b>760.3737</b>  | 380.6905        | 743.3471         | 372.1772         |                |                  | 7  |
| 9  | 972.5149        | 486.7611        | 955.4884       | 478.2478         | 954.5043       | 477.7558         | A    | <b>661.3053</b>  | 331.1563        | 644.2787         | 322.6430         |                |                  | 6  |
| 10 | 1158.5942       | 579.8007        | 1141.5677      | 571.2875         | 1140.5837      | 570.7955         | W    | <b>590.2681</b>  | 295.6377        | 573.2416         | 287.1244         |                |                  | 5  |
| 11 | 1215.6157       | 608.3115        | 1198.5891      | 599.7982         | 1197.6051      | 599.3062         | G    | <b>404.1888</b>  | 202.5980        | 387.1623         | 194.0848         |                |                  | 4  |
| 12 | 1330.6426       | 665.8250        | 1313.6161      | 657.3117         | 1312.6321      | 656.8197         | N    | <b>347.1674</b>  | 174.0873        | 330.1408         | 165.5740         |                |                  | 3  |
| 13 | 1387.6641       | 694.3357        | 1370.6375      | 685.8224         | 1369.6535      | 685.3304         | G    | <b>232.1404</b>  | 116.5738        | 215.1139         | 108.0606         |                |                  | 2  |
| 14 |                 |                 |                |                  |                |                  | R    | <b>175.1190</b>  | 88.0631         | 158.0924         | 79.5498          |                |                  | 1  |

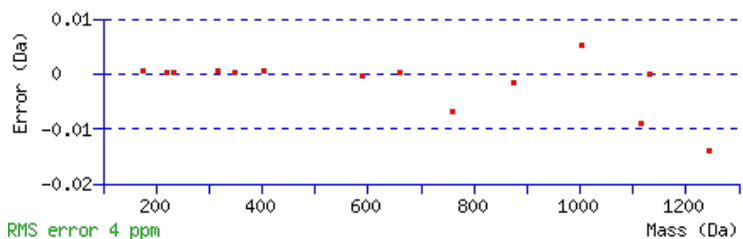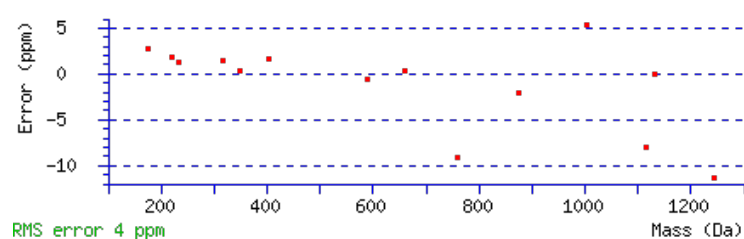

NCBI BLAST search of [FAVLQENVAWGNGR](#)

(Parameters: blastp, nr protein database, expect=20000, no filter, PAM30)

Other BLAST [web gateways](#)

**All matches to this query**

| Score | Mr(calc)  | Delta  | Sequence                       | Site Analysis         |
|-------|-----------|--------|--------------------------------|-----------------------|
| 52.8  | 1560.7685 | 1.0067 | <a href="#">FAVLQENVAWGNGR</a> | Deamidated N12 99.99% |
| 13.3  | 1560.7685 | 1.0067 | <a href="#">FAVLQENVAWGNGR</a> | Deamidated N7 0.01%   |
| 3.8   | 1560.7685 | 1.0067 | <a href="#">FAVLQENVAWGNGR</a> | Deamidated Q5 0.00%   |

Mascot: <http://www.matrixscience.com/>

# Mascot Search Results

## Peptide View

MS/MS Fragmentation of **EDGGGWYNRCHAANPNGR**

Found in **P02675** in **uni\_human\_nr**, FIBB\_HUMAN Fibrinogen beta chain OS=Homo sapiens GN=FGB PE=1 SV=2

Match to Query 8994: 2217.906696 from(555.483950,4+) intensity(105656.2188) rtinseconds(1757) scans(8875) index(6210)

Title: 130806\_HPL\_Human\_Plaque\_BR2\_TR2\_15\_Spectrum026327\_scans\_\_8875\_RTINSECONDS=1757

Data file E:\\RAW\\HumanPlaques\\imgf\\T\\1D\\T130806\_HPL\_Human\_Plaque\_BR2\_TR2\_15.mgf

Click mouse within plot area to zoom in by factor of two about that point

Or,  to  Da

Label all possible matches  Label matches used for scoring

Show Y-axis

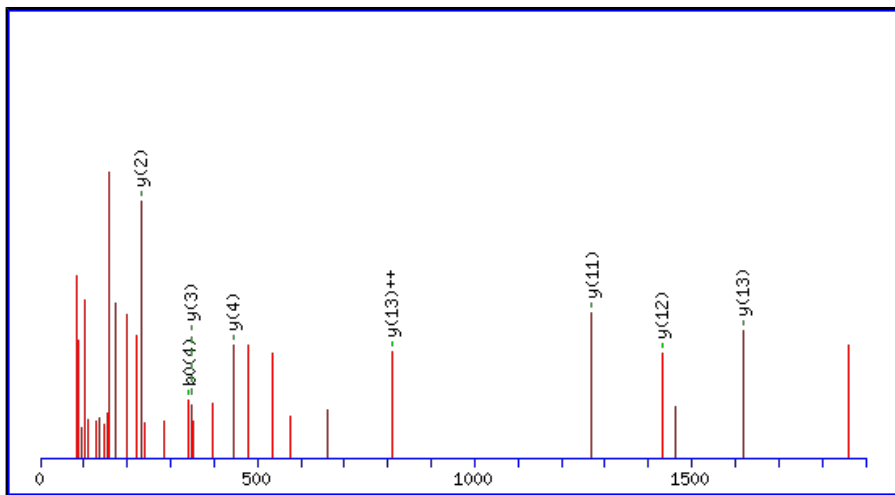

Monoisotopic mass of neutral peptide **Mr(calc):** 2217.9035

Fixed modifications: Carbamidomethyl (C) (apply to specified residues or termini only)

Variable modifications:

N15 : Deamidated (NQ)

N17 : Deamidated (NQ)

Ions Score: 24 Expect: 0.042

Matches : 8/166 fragment ions using 17 most intense peaks ([help](#))

| #  | b         | b <sup>++</sup> | b <sup>*</sup> | b <sup>***</sup> | b <sup>0</sup> | b <sup>0++</sup> | Seq. | y         | y <sup>++</sup> | y <sup>*</sup> | y <sup>***</sup> | y <sup>0</sup> | y <sup>0++</sup> | #  |
|----|-----------|-----------------|----------------|------------------|----------------|------------------|------|-----------|-----------------|----------------|------------------|----------------|------------------|----|
| 1  | 130.0499  | 65.5286         |                |                  | 112.0393       | 56.5233          | E    |           |                 |                |                  |                |                  | 19 |
| 2  | 245.0768  | 123.0420        |                |                  | 227.0662       | 114.0368         | D    | 2089.8682 | 1045.4377       | 2072.8416      | 1036.9245        | 2071.8576      | 1036.4324        | 18 |
| 3  | 302.0983  | 151.5528        |                |                  | 284.0877       | 142.5475         | G    | 1974.8412 | 987.9243        | 1957.8147      | 979.4110         |                |                  | 17 |
| 4  | 359.1197  | 180.0635        |                |                  | 341.1092       | 171.0582         | G    | 1917.8198 | 959.4135        | 1900.7932      | 950.9003         |                |                  | 16 |
| 5  | 416.1412  | 208.5742        |                |                  | 398.1306       | 199.5690         | G    | 1860.7983 | 930.9028        | 1843.7718      | 922.3895         |                |                  | 15 |
| 6  | 602.2205  | 301.6139        |                |                  | 584.2100       | 292.6086         | W    | 1803.7768 | 902.3921        | 1786.7503      | 893.8788         |                |                  | 14 |
| 7  | 788.2998  | 394.6536        |                |                  | 770.2893       | 385.6483         | W    | 1617.6975 | 809.3524        | 1600.6710      | 800.8391         |                |                  | 13 |
| 8  | 951.3632  | 476.1852        |                |                  | 933.3526       | 467.1799         | Y    | 1431.6182 | 716.3127        | 1414.5917      | 707.7995         |                |                  | 12 |
| 9  | 1065.4061 | 533.2067        | 1048.3795      | 524.6934         | 1047.3955      | 524.2014         | N    | 1268.5549 | 634.7811        | 1251.5283      | 626.2678         |                |                  | 11 |
| 10 | 1221.5072 | 611.2572        | 1204.4806      | 602.7440         | 1203.4966      | 602.2520         | R    | 1154.5120 | 577.7596        | 1137.4854      | 569.2463         |                |                  | 10 |
| 11 | 1381.5378 | 691.2726        | 1364.5113      | 682.7593         | 1363.5273      | 682.2673         | C    | 998.4109  | 499.7091        | 981.3843       | 491.1958         |                |                  | 9  |
| 12 | 1518.5968 | 759.8020        | 1501.5702      | 751.2887         | 1500.5862      | 750.7967         | H    | 838.3802  | 419.6937        | 821.3537       | 411.1805         |                |                  | 8  |
| 13 | 1589.6339 | 795.3206        | 1572.6073      | 786.8073         | 1571.6233      | 786.3153         | A    | 701.3213  | 351.1643        | 684.2947       | 342.6510         |                |                  | 7  |
| 14 | 1660.6710 | 830.8391        | 1643.6444      | 822.3259         | 1642.6604      | 821.8338         | A    | 630.2842  | 315.6457        | 613.2576       | 307.1325         |                |                  | 6  |
| 15 | 1775.6979 | 888.3526        | 1758.6714      | 879.8393         | 1757.6874      | 879.3473         | N    | 559.2471  | 280.1272        | 542.2205       | 271.6139         |                |                  | 5  |
| 16 | 1872.7507 | 936.8790        | 1855.7241      | 928.3657         | 1854.7401      | 927.8737         | P    | 444.2201  | 222.6137        | 427.1936       | 214.1004         |                |                  | 4  |
| 17 | 1987.7776 | 994.3925        | 1970.7511      | 985.8792         | 1969.7671      | 985.3872         | N    | 347.1674  | 174.0873        | 330.1408       | 165.5740         |                |                  | 3  |



|    |           |           |           |           |           |           |   |          |          |          |          |  |  |   |
|----|-----------|-----------|-----------|-----------|-----------|-----------|---|----------|----------|----------|----------|--|--|---|
| 18 | 2044.7991 | 1022.9032 | 2027.7726 | 1014.3899 | 2026.7885 | 1013.8979 | G | 232.1404 | 116.5738 | 215.1139 | 108.0606 |  |  | 2 |
| 19 |           |           |           |           |           |           | R | 175.1190 | 88.0631  | 158.0924 | 79.5498  |  |  | 1 |

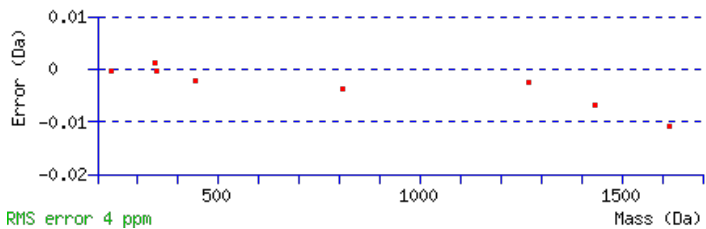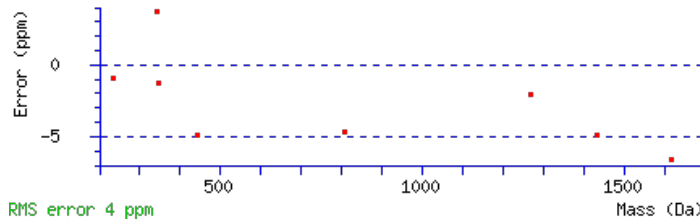

NCBI BLAST search of [EDGGGWYNRCHAANPNGR](#)  
 (Parameters: blastp, nr protein database, expect=20000, no filter, PAM30)  
 Other BLAST [web gateways](#)

**All matches to this query**

| Score | Mr(calc)  | Delta  | Sequence                           | Site Analysis              |
|-------|-----------|--------|------------------------------------|----------------------------|
| 24.1  | 2217.9035 | 0.0032 | <a href="#">EDGGGWYNRCHAANPNGR</a> | Deamidated N15, N17 47.63% |
| 24.1  | 2217.9035 | 0.0032 | <a href="#">EDGGGWYNRCHAANPNGR</a> | Deamidated N9, N17 47.63%  |
| 14.1  | 2217.9035 | 0.0032 | <a href="#">EDGGGWYNRCHAANPNGR</a> | Deamidated N9, N15 4.73%   |

Mascot: <http://www.matrixscience.com/>

# Mascot Search Results

## Peptide View

MS/MS Fragmentation of **EDGGGWYNRCHAANPNGR**

Found in **P02675** in **uni\_human\_nr**, FIBB\_HUMAN Fibrinogen beta chain OS=Homo sapiens GN=FGB PE=1 SV=2

Match to Query 11110: 2215.937456 from(554.991640,4+) intensity(1238908.0000) rtinseconds(1404) scans(6941) index(4640)

Title: 130801\_HPL\_Human\_Plaque\_BR2\_TR1\_03\_Spectrum027582\_scans\_6941\_RTINSECONDS=1404

Data file E:\\RAW\\HumanPlaques\\mgf\\T\\1D\\T130801\_HPL\_Human\_Plaque\_BR2\_TR1\_03.mgf

Click mouse within plot area to zoom in by factor of two about that point

Or,  to  Da

Label all possible matches  Label matches used for scoring

Show Y-axis

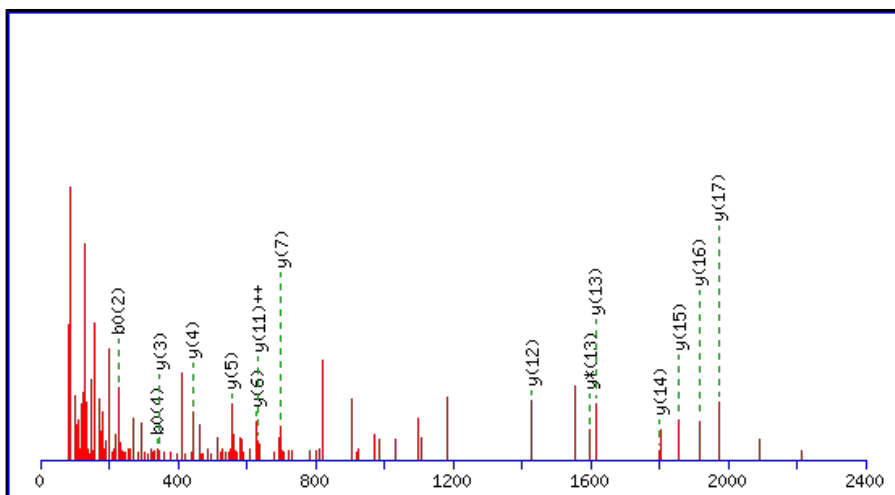

Monoisotopic mass of neutral peptide Mr(calc): 2215.9355

Fixed modifications: Carbamidomethyl (C) (apply to specified residues or termini only)

Ions Score: 29 Expect: 0.027

Matches : 15/166 fragment ions using 61 most intense peaks ([help](#))

| #  | b         | b <sup>++</sup> | b*        | b <sup>***</sup> | b <sup>0</sup> | b <sup>0++</sup> | Seq. | y         | y <sup>++</sup> | y*        | y <sup>***</sup> | y <sup>0</sup> | y <sup>0++</sup> | #  |
|----|-----------|-----------------|-----------|------------------|----------------|------------------|------|-----------|-----------------|-----------|------------------|----------------|------------------|----|
| 1  | 130.0499  | 65.5286         |           |                  | 112.0393       | 56.5233          | E    |           |                 |           |                  |                |                  | 19 |
| 2  | 245.0768  | 123.0420        |           |                  | 227.0662       | 114.0368         | D    | 2087.9002 | 1044.4537       | 2070.8736 | 1035.9404        | 2069.8896      | 1035.4484        | 18 |
| 3  | 302.0983  | 151.5528        |           |                  | 284.0877       | 142.5475         | G    | 1972.8732 | 986.9402        | 1955.8467 | 978.4270         |                |                  | 17 |
| 4  | 359.1197  | 180.0635        |           |                  | 341.1092       | 171.0582         | G    | 1915.8517 | 958.4295        | 1898.8252 | 949.9162         |                |                  | 16 |
| 5  | 416.1412  | 208.5742        |           |                  | 398.1306       | 199.5690         | G    | 1858.8303 | 929.9188        | 1841.8037 | 921.4055         |                |                  | 15 |
| 6  | 602.2205  | 301.6139        |           |                  | 584.2100       | 292.6086         | W    | 1801.8088 | 901.4080        | 1784.7823 | 892.8948         |                |                  | 14 |
| 7  | 788.2998  | 394.6536        |           |                  | 770.2893       | 385.6483         | W    | 1615.7295 | 808.3684        | 1598.7030 | 799.8551         |                |                  | 13 |
| 8  | 951.3632  | 476.1852        |           |                  | 933.3526       | 467.1799         | Y    | 1429.6502 | 715.3287        | 1412.6236 | 706.8155         |                |                  | 12 |
| 9  | 1065.4061 | 533.2067        | 1048.3795 | 524.6934         | 1047.3955      | 524.2014         | N    | 1266.5869 | 633.7971        | 1249.5603 | 625.2838         |                |                  | 11 |
| 10 | 1221.5072 | 611.2572        | 1204.4806 | 602.7440         | 1203.4966      | 602.2520         | R    | 1152.5439 | 576.7756        | 1135.5174 | 568.2623         |                |                  | 10 |
| 11 | 1381.5378 | 691.2726        | 1364.5113 | 682.7593         | 1363.5273      | 682.2673         | C    | 996.4428  | 498.7250        | 979.4163  | 490.2118         |                |                  | 9  |
| 12 | 1518.5968 | 759.8020        | 1501.5702 | 751.2887         | 1500.5862      | 750.7967         | H    | 836.4122  | 418.7097        | 819.3856  | 410.1965         |                |                  | 8  |
| 13 | 1589.6339 | 795.3206        | 1572.6073 | 786.8073         | 1571.6233      | 786.3153         | A    | 699.3533  | 350.1803        | 682.3267  | 341.6670         |                |                  | 7  |
| 14 | 1660.6710 | 830.8391        | 1643.6444 | 822.3259         | 1642.6604      | 821.8338         | A    | 628.3161  | 314.6617        | 611.2896  | 306.1484         |                |                  | 6  |
| 15 | 1774.7139 | 887.8606        | 1757.6874 | 879.3473         | 1756.7033      | 878.8553         | N    | 557.2790  | 279.1432        | 540.2525  | 270.6299         |                |                  | 5  |
| 16 | 1871.7667 | 936.3870        | 1854.7401 | 927.8737         | 1853.7561      | 927.3817         | P    | 443.2361  | 222.1217        | 426.2096  | 213.6084         |                |                  | 4  |
| 17 | 1985.8096 | 993.4084        | 1968.7831 | 984.8952         | 1967.7990      | 984.4032         | N    | 346.1833  | 173.5953        | 329.1568  | 165.0820         |                |                  | 3  |
| 18 | 2042.8311 | 1021.9192       | 2025.8045 | 1013.4059        | 2024.8205      | 1012.9139        | G    | 232.1404  | 116.5738        | 215.1139  | 108.0606         |                |                  | 2  |
| 19 |           |                 |           |                  |                |                  | R    | 175.1190  | 88.0631         | 158.0924  | 79.5498          |                |                  | 1  |

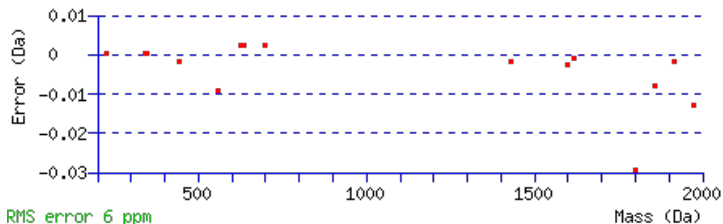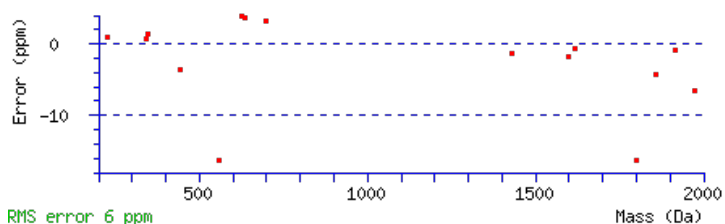

NCBI **BLAST** search of [EDGGGWWYNRCHAANPNGR](#)  
 (Parameters: blastp, nr protein database, expect=20000, no filter, PAM30)  
 Other BLAST [web gateways](#)

**All matches to this query**

| Score | Mr(calc)  | Delta  | Sequence                            |
|-------|-----------|--------|-------------------------------------|
| 29.1  | 2215.9355 | 0.0020 | <a href="#">EDGGGWWYNRCHAANPNGR</a> |

Mascot: <http://www.matrixscience.com/>

# Mascot Search Results

## Peptide View

MS/MS Fragmentation of **EGFGHLSPTGTTEFWLGNKIHLISTQSAIPYALRVELEDWNGR**

Found in **P02679** in **uni\_human\_nr**, FIBG\_HUMAN Fibrinogen gamma chain OS=Homo sapiens GN=FGG PE=1 SV=3

Match to Query 23881: 4971.487370 from(995.304750,5+) intensity(5309084.0000) rtinseconds(3346) scans(23026) index(18926)

Title: 130806\_HPL\_Human\_Plaque\_BR1\_TR2\_01\_Spectrum043298\_scans\_23026\_RTINSECONDS=3346

Data file E:\\RAW\\HumanPlaques\\imgf\\T\\1D\\T130806\_HPL\_Human\_Plaque\_BR1\_TR2\_01.mgf

Click mouse within plot area to zoom in by factor of two about that point

Or,  to  Da  
 Label all possible matches  Label matches used for scoring   
 Show Y-axis

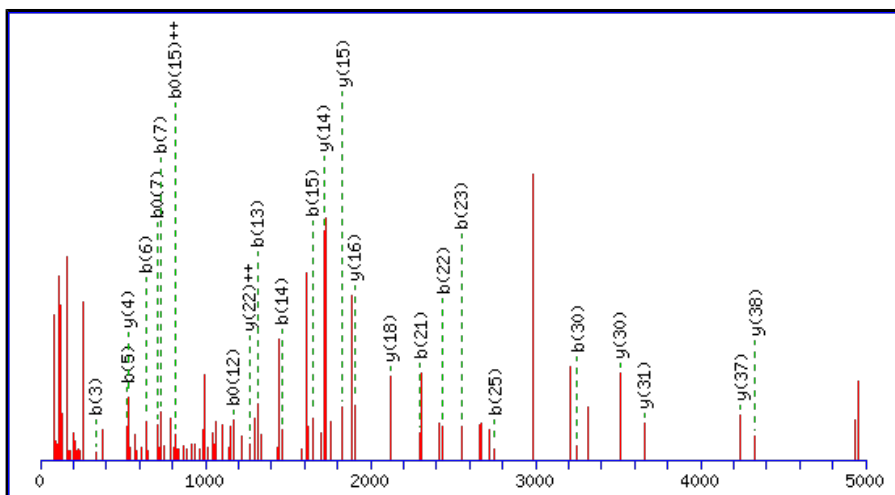

Monoisotopic mass of neutral peptide **Mr(calc):** 4969.4675

Fixed modifications: Carbamidomethyl (C) (apply to specified residues or termini only)

Variable modifications:

Q27 : Deamidated (NQ)

Ions Score: 50 Expect: 0.00042

Matches : 25/474 fragment ions using 53 most intense peaks ([help](#))

| #  | b                | b <sup>++</sup> | b <sup>*</sup> | b <sup>*++</sup> | b <sup>0</sup>   | b <sup>0++</sup> | Seq. | y                | y <sup>++</sup> | y <sup>*</sup> | y <sup>*++</sup> | y <sup>0</sup> | y <sup>0++</sup> | #  |
|----|------------------|-----------------|----------------|------------------|------------------|------------------|------|------------------|-----------------|----------------|------------------|----------------|------------------|----|
| 1  | 130.0499         | 65.5286         |                |                  | 112.0393         | 56.5233          | E    |                  |                 |                |                  |                |                  | 44 |
| 2  | 187.0713         | 94.0393         |                |                  | 169.0608         | 85.0340          | G    | 4841.4322        | 2421.2197       | 4824.4056      | 2412.7065        | 4823.4216      | 2412.2145        | 43 |
| 3  | <b>334.1397</b>  | 167.5735        |                |                  | 316.1292         | 158.5682         | F    | 4784.4107        | 2392.7090       | 4767.3842      | 2384.1957        | 4766.4002      | 2383.7037        | 42 |
| 4  | 391.1612         | 196.0842        |                |                  | 373.1506         | 187.0790         | G    | 4637.3423        | 2319.1748       | 4620.3158      | 2310.6615        | 4619.3318      | 2310.1695        | 41 |
| 5  | <b>528.2201</b>  | 264.6137        |                |                  | 510.2096         | 255.6084         | H    | 4580.3209        | 2290.6641       | 4563.2943      | 2282.1508        | 4562.3103      | 2281.6588        | 40 |
| 6  | <b>641.3042</b>  | 321.1557        |                |                  | 623.2936         | 312.1504         | L    | 4443.2619        | 2222.1346       | 4426.2354      | 2213.6213        | 4425.2514      | 2213.1293        | 39 |
| 7  | <b>728.3362</b>  | 364.6717        |                |                  | <b>710.3257</b>  | 355.6665         | S    | <b>4330.1779</b> | 2165.5926       | 4313.1513      | 2157.0793        | 4312.1673      | 2156.5873        | 38 |
| 8  | 825.3890         | 413.1981        |                |                  | 807.3784         | 404.1928         | P    | <b>4243.1459</b> | 2122.0766       | 4226.1193      | 2113.5633        | 4225.1353      | 2113.0713        | 37 |
| 9  | 926.4367         | 463.7220        |                |                  | 908.4261         | 454.7167         | T    | 4146.0931        | 2073.5502       | 4129.0665      | 2065.0369        | 4128.0825      | 2064.5449        | 36 |
| 10 | 983.4581         | 492.2327        |                |                  | 965.4476         | 483.2274         | G    | 4045.0454        | 2023.0263       | 4028.0189      | 2014.5131        | 4027.0348      | 2014.0211        | 35 |
| 11 | 1084.5058        | 542.7565        |                |                  | 1066.4952        | 533.7513         | T    | 3988.0239        | 1994.5156       | 3970.9974      | 1986.0023        | 3970.0134      | 1985.5103        | 34 |
| 12 | 1185.5535        | 593.2804        |                |                  | <b>1167.5429</b> | 584.2751         | T    | 3886.9763        | 1943.9918       | 3869.9497      | 1935.4785        | 3868.9657      | 1934.9865        | 33 |
| 13 | <b>1314.5961</b> | 657.8017        |                |                  | 1296.5855        | 648.7964         | E    | 3785.9286        | 1893.4679       | 3768.9020      | 1884.9547        | 3767.9180      | 1884.4626        | 32 |
| 14 | <b>1461.6645</b> | 731.3359        |                |                  | 1443.6539        | 722.3306         | F    | <b>3656.8860</b> | 1828.9466       | 3639.8594      | 1820.4334        | 3638.8754      | 1819.9414        | 31 |
| 15 | <b>1647.7438</b> | 824.3755        |                |                  | 1629.7332        | <b>815.3703</b>  | W    | <b>3509.8176</b> | 1755.4124       | 3492.7910      | 1746.8992        | 3491.8070      | 1746.4071        | 30 |
| 16 | 1760.8279        | 880.9176        |                |                  | 1742.8173        | 871.9123         | L    | 3323.7383        | 1662.3728       | 3306.7117      | 1653.8595        | 3305.7277      | 1653.3675        | 29 |
| 17 | 1817.8493        | 909.4283        |                |                  | 1799.8388        | 900.4230         | G    | 3210.6542        | 1605.8307       | 3193.6277      | 1597.3175        | 3192.6436      | 1596.8255        | 28 |
| 18 | 1931.8923        | 966.4498        | 1914.8657      | 957.9365         | 1913.8817        | 957.4445         | N    | 3153.6327        | 1577.3200       | 3136.6062      | 1568.8067        | 3135.6222      | 1568.3147        | 27 |

|    |                  |           |           |           |           |           |   |                  |                  |           |           |           |           |    |
|----|------------------|-----------|-----------|-----------|-----------|-----------|---|------------------|------------------|-----------|-----------|-----------|-----------|----|
| 19 | 2060.9348        | 1030.9711 | 2043.9083 | 1022.4578 | 2042.9243 | 1021.9658 | E | 3039.5898        | 1520.2985        | 3022.5633 | 1511.7853 | 3021.5792 | 1511.2933 | 26 |
| 20 | 2189.0298        | 1095.0185 | 2172.0033 | 1086.5053 | 2171.0192 | 1086.0133 | K | 2910.5472        | 1455.7772        | 2893.5207 | 1447.2640 | 2892.5367 | 1446.7720 | 25 |
| 21 | <b>2302.1139</b> | 1151.5606 | 2285.0873 | 1143.0473 | 2284.1033 | 1142.5553 | I | 2782.4523        | 1391.7298        | 2765.4257 | 1383.2165 | 2764.4417 | 1382.7245 | 24 |
| 22 | <b>2439.1728</b> | 1220.0900 | 2422.1462 | 1211.5768 | 2421.1622 | 1211.0847 | H | 2669.3682        | 1335.1877        | 2652.3416 | 1326.6745 | 2651.3576 | 1326.1825 | 23 |
| 23 | <b>2552.2569</b> | 1276.6321 | 2535.2303 | 1268.1188 | 2534.2463 | 1267.6268 | L | 2532.3093        | <b>1266.6583</b> | 2515.2827 | 1258.1450 | 2514.2987 | 1257.6530 | 22 |
| 24 | 2665.3409        | 1333.1741 | 2648.3144 | 1324.6608 | 2647.3303 | 1324.1688 | I | 2419.2252        | 1210.1162        | 2402.1987 | 1201.6030 | 2401.2147 | 1201.1110 | 21 |
| 25 | <b>2752.3729</b> | 1376.6901 | 2735.3464 | 1368.1768 | 2734.3624 | 1367.6848 | S | 2306.1412        | 1153.5742        | 2289.1146 | 1145.0609 | 2288.1306 | 1144.5689 | 20 |
| 26 | 2853.4206        | 1427.2139 | 2836.3941 | 1418.7007 | 2835.4101 | 1418.2087 | T | 2219.1091        | 1110.0582        | 2202.0826 | 1101.5449 | 2201.0986 | 1101.0529 | 19 |
| 27 | 2982.4632        | 1491.7352 | 2965.4367 | 1483.2220 | 2964.4527 | 1482.7300 | Q | <b>2118.0614</b> | 1059.5344        | 2101.0349 | 1051.0211 | 2100.0509 | 1050.5291 | 18 |
| 28 | 3069.4952        | 1535.2513 | 3052.4687 | 1526.7380 | 3051.4847 | 1526.2460 | S | 1989.0189        | 995.0131         | 1971.9923 | 986.4998  | 1971.0083 | 986.0078  | 17 |
| 29 | 3140.5324        | 1570.7698 | 3123.5058 | 1562.2565 | 3122.5218 | 1561.7645 | A | <b>1901.9868</b> | 951.4970         | 1884.9603 | 942.9838  | 1883.9763 | 942.4918  | 16 |
| 30 | <b>3253.6164</b> | 1627.3118 | 3236.5899 | 1618.7986 | 3235.6059 | 1618.3066 | I | <b>1830.9497</b> | 915.9785         | 1813.9232 | 907.4652  | 1812.9391 | 906.9732  | 15 |
| 31 | 3350.6692        | 1675.8382 | 3333.6426 | 1667.3250 | 3332.6586 | 1666.8329 | P | <b>1717.8656</b> | 859.4365         | 1700.8391 | 850.9232  | 1699.8551 | 850.4312  | 14 |
| 32 | 3513.7325        | 1757.3699 | 3496.7060 | 1748.8566 | 3495.7220 | 1748.3646 | Y | 1620.8129        | 810.9101         | 1603.7863 | 802.3968  | 1602.8023 | 801.9048  | 13 |
| 33 | 3584.7696        | 1792.8885 | 3567.7431 | 1784.3752 | 3566.7591 | 1783.8832 | A | 1457.7496        | 729.3784         | 1440.7230 | 720.8651  | 1439.7390 | 720.3731  | 12 |
| 34 | 3697.8537        | 1849.4305 | 3680.8271 | 1840.9172 | 3679.8431 | 1840.4252 | L | 1386.7124        | 693.8599         | 1369.6859 | 685.3466  | 1368.7019 | 684.8546  | 11 |
| 35 | 3853.9548        | 1927.4810 | 3836.9283 | 1918.9678 | 3835.9442 | 1918.4758 | R | 1273.6284        | 637.3178         | 1256.6018 | 628.8046  | 1255.6178 | 628.3125  | 10 |
| 36 | 3953.0232        | 1977.0152 | 3935.9967 | 1968.5020 | 3935.0127 | 1968.0100 | V | 1117.5273        | 559.2673         | 1100.5007 | 550.7540  | 1099.5167 | 550.2620  | 9  |
| 37 | 4082.0658        | 2041.5365 | 4065.0393 | 2033.0233 | 4064.0552 | 2032.5313 | E | 1018.4588        | 509.7331         | 1001.4323 | 501.2198  | 1000.4483 | 500.7278  | 8  |
| 38 | 4195.1499        | 2098.0786 | 4178.1233 | 2089.5653 | 4177.1393 | 2089.0733 | L | 889.4163         | 445.2118         | 872.3897  | 436.6985  | 871.4057  | 436.2065  | 7  |
| 39 | 4324.1925        | 2162.5999 | 4307.1659 | 2154.0866 | 4306.1819 | 2153.5946 | E | 776.3322         | 388.6697         | 759.3056  | 380.1565  | 758.3216  | 379.6645  | 6  |
| 40 | 4439.2194        | 2220.1133 | 4422.1929 | 2211.6001 | 4421.2088 | 2211.1081 | D | 647.2896         | 324.1484         | 630.2631  | 315.6352  | 629.2790  | 315.1432  | 5  |
| 41 | 4625.2987        | 2313.1530 | 4608.2722 | 2304.6397 | 4607.2882 | 2304.1477 | W | <b>532.2627</b>  | 266.6350         | 515.2361  | 258.1217  |           |           | 4  |
| 42 | 4739.3417        | 2370.1745 | 4722.3151 | 2361.6612 | 4721.3311 | 2361.1692 | N | 346.1833         | 173.5953         | 329.1568  | 165.0820  |           |           | 3  |
| 43 | 4796.3631        | 2398.6852 | 4779.3366 | 2390.1719 | 4778.3526 | 2389.6799 | G | 232.1404         | 116.5738         | 215.1139  | 108.0606  |           |           | 2  |
| 44 |                  |           |           |           |           |           | R | 175.1190         | 88.0631          | 158.0924  | 79.5498   |           |           | 1  |

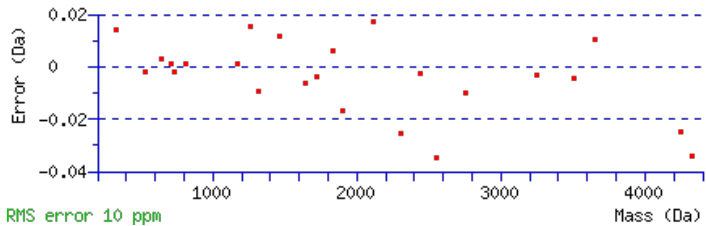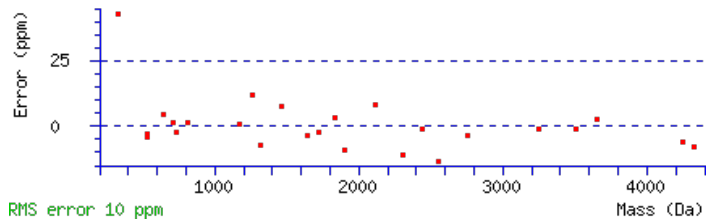

NCBI BLAST search of [EGFGHLSPTGTTEFWLGNEKIHLISTQSAIPYALRVELEDWNGR](#)

(Parameters: blastp, nr protein database, expect=20000, no filter, PAM30)

Other BLAST [web gateways](#)

**All matches to this query**

| Score | Mr(calc)  | Delta  | Sequence                                                     | Site Analysis         |
|-------|-----------|--------|--------------------------------------------------------------|-----------------------|
| 50.3  | 4969.4675 | 2.0199 | <a href="#">EGFGHLSPTGTTEFWLGNEKIHLISTQSAIPYALRVELEDWNGR</a> | Deamidated Q27 95.64% |
| 36.0  | 4969.4675 | 2.0199 | <a href="#">EGFGHLSPTGTTEFWLGNEKIHLISTQSAIPYALRVELEDWNGR</a> | Deamidated N18 3.58%  |
| 29.4  | 4969.4675 | 2.0199 | <a href="#">EGFGHLSPTGTTEFWLGNEKIHLISTQSAIPYALRVELEDWNGR</a> | Deamidated N42 0.78%  |

Mascot: <http://www.matrixscience.com/>

# Mascot Search Results

## Peptide View

MS/MS Fragmentation of **EGFGHLSPTGTTEFWLGNKIHLISTQSAIPYALRVELEDWNGR**

Found in **P02679** in **uni\_human\_nr**, FIBG\_HUMAN Fibrinogen gamma chain OS=Homo sapiens GN=FGG PE=1 SV=3

Match to Query 23083: 4971.484764 from(829.588070,6+) intensity(14187161.0000) rtinseconds(3338) scans(22434) index(18122)

Title: 130801\_HPL\_Human\_Plaque\_BR1\_TR1\_01\_Spectrum041770\_scans\_22434\_RTINSECONDS=3338

Data file E:\\RAW\\HumanPlaques\\mgf\\T\\1D\\T130801\_HPL\_Human\_Plaque\_BR1\_TR1\_01.mgf

Click mouse within plot area to zoom in by factor of two about that point

Or,  to  Da

Label all possible matches  Label matches used for scoring

Show Y-axis

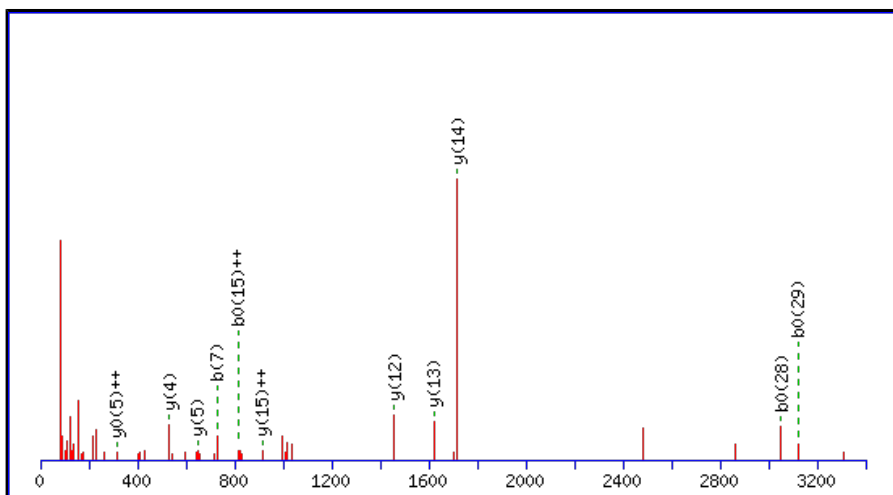

Monoisotopic mass of neutral peptide Mr(calc): 4969.4675

Fixed modifications: Carbamidomethyl (C) (apply to specified residues or termini only)

Variable modifications:

Q27 : Deamidated (NQ)

Ions Score: 19 Expect: 0.6

Matches : 11/474 fragment ions using 18 most intense peaks ([help](#))

| #  | b               | b <sup>++</sup> | b <sup>*</sup> | b <sup>***</sup> | b <sup>0</sup> | b <sup>0++</sup> | Seq. | y         | y <sup>++</sup> | y <sup>*</sup> | y <sup>***</sup> | y <sup>0</sup> | y <sup>0++</sup> | #  |
|----|-----------------|-----------------|----------------|------------------|----------------|------------------|------|-----------|-----------------|----------------|------------------|----------------|------------------|----|
| 1  | 130.0499        | 65.5286         |                |                  | 112.0393       | 56.5233          | E    |           |                 |                |                  |                |                  | 44 |
| 2  | 187.0713        | 94.0393         |                |                  | 169.0608       | 85.0340          | G    | 4841.4322 | 2421.2197       | 4824.4056      | 2412.7065        | 4823.4216      | 2412.2145        | 43 |
| 3  | 334.1397        | 167.5735        |                |                  | 316.1292       | 158.5682         | F    | 4784.4107 | 2392.7090       | 4767.3842      | 2384.1957        | 4766.4002      | 2383.7037        | 42 |
| 4  | 391.1612        | 196.0842        |                |                  | 373.1506       | 187.0790         | G    | 4637.3423 | 2319.1748       | 4620.3158      | 2310.6615        | 4619.3318      | 2310.1695        | 41 |
| 5  | 528.2201        | 264.6137        |                |                  | 510.2096       | 255.6084         | H    | 4580.3209 | 2290.6641       | 4563.2943      | 2282.1508        | 4562.3103      | 2281.6588        | 40 |
| 6  | 641.3042        | 321.1557        |                |                  | 623.2936       | 312.1504         | L    | 4443.2619 | 2222.1346       | 4426.2354      | 2213.6213        | 4425.2514      | 2213.1293        | 39 |
| 7  | <b>728.3362</b> | 364.6717        |                |                  | 710.3257       | 355.6665         | S    | 4330.1779 | 2165.5926       | 4313.1513      | 2157.0793        | 4312.1673      | 2156.5873        | 38 |
| 8  | 825.3890        | 413.1981        |                |                  | 807.3784       | 404.1928         | P    | 4243.1459 | 2122.0766       | 4226.1193      | 2113.5633        | 4225.1353      | 2113.0713        | 37 |
| 9  | 926.4367        | 463.7220        |                |                  | 908.4261       | 454.7167         | T    | 4146.0931 | 2073.5502       | 4129.0665      | 2065.0369        | 4128.0825      | 2064.5449        | 36 |
| 10 | 983.4581        | 492.2327        |                |                  | 965.4476       | 483.2274         | G    | 4045.0454 | 2023.0263       | 4028.0189      | 2014.5131        | 4027.0348      | 2014.0211        | 35 |
| 11 | 1084.5058       | 542.7565        |                |                  | 1066.4952      | 533.7513         | T    | 3988.0239 | 1994.5156       | 3970.9974      | 1986.0023        | 3970.0134      | 1985.5103        | 34 |
| 12 | 1185.5535       | 593.2804        |                |                  | 1167.5429      | 584.2751         | T    | 3886.9763 | 1943.9918       | 3869.9497      | 1935.4785        | 3868.9657      | 1934.9865        | 33 |
| 13 | 1314.5961       | 657.8017        |                |                  | 1296.5855      | 648.7964         | E    | 3785.9286 | 1893.4679       | 3768.9020      | 1884.9547        | 3767.9180      | 1884.4626        | 32 |
| 14 | 1461.6645       | 731.3359        |                |                  | 1443.6539      | 722.3306         | F    | 3656.8860 | 1828.9466       | 3639.8594      | 1820.4334        | 3638.8754      | 1819.9414        | 31 |
| 15 | 1647.7438       | 824.3755        |                |                  | 1629.7332      | <b>815.3703</b>  | W    | 3509.8176 | 1755.4124       | 3492.7910      | 1746.8992        | 3491.8070      | 1746.4071        | 30 |
| 16 | 1760.8279       | 880.9176        |                |                  | 1742.8173      | 871.9123         | L    | 3323.7383 | 1662.3728       | 3306.7117      | 1653.8595        | 3305.7277      | 1653.3675        | 29 |
| 17 | 1817.8493       | 909.4283        |                |                  | 1799.8388      | 900.4230         | G    | 3210.6542 | 1605.8307       | 3193.6277      | 1597.3175        | 3192.6436      | 1596.8255        | 28 |
| 18 | 1931.8923       | 966.4498        | 1914.8657      | 957.9365         | 1913.8817      | 957.4445         | N    | 3153.6327 | 1577.3200       | 3136.6062      | 1568.8067        | 3135.6222      | 1568.3147        | 27 |

|    |           |           |           |           |           |           |   |           |           |           |           |           |           |    |
|----|-----------|-----------|-----------|-----------|-----------|-----------|---|-----------|-----------|-----------|-----------|-----------|-----------|----|
| 19 | 2060.9348 | 1030.9711 | 2043.9083 | 1022.4578 | 2042.9243 | 1021.9658 | E | 3039.5898 | 1520.2985 | 3022.5633 | 1511.7853 | 3021.5792 | 1511.2933 | 26 |
| 20 | 2189.0298 | 1095.0185 | 2172.0033 | 1086.5053 | 2171.0192 | 1086.0133 | K | 2910.5472 | 1455.7772 | 2893.5207 | 1447.2640 | 2892.5367 | 1446.7720 | 25 |
| 21 | 2302.1139 | 1151.5606 | 2285.0873 | 1143.0473 | 2284.1033 | 1142.5553 | I | 2782.4523 | 1391.7298 | 2765.4257 | 1383.2165 | 2764.4417 | 1382.7245 | 24 |
| 22 | 2439.1728 | 1220.0900 | 2422.1462 | 1211.5768 | 2421.1622 | 1211.0847 | H | 2669.3682 | 1335.1877 | 2652.3416 | 1326.6745 | 2651.3576 | 1326.1825 | 23 |
| 23 | 2552.2569 | 1276.6321 | 2535.2303 | 1268.1188 | 2534.2463 | 1267.6268 | L | 2532.3093 | 1266.6583 | 2515.2827 | 1258.1450 | 2514.2987 | 1257.6530 | 22 |
| 24 | 2665.3409 | 1333.1741 | 2648.3144 | 1324.6608 | 2647.3303 | 1324.1688 | I | 2419.2252 | 1210.1162 | 2402.1987 | 1201.6030 | 2401.2147 | 1201.1110 | 21 |
| 25 | 2752.3729 | 1376.6901 | 2735.3464 | 1368.1768 | 2734.3624 | 1367.6848 | S | 2306.1412 | 1153.5742 | 2289.1146 | 1145.0609 | 2288.1306 | 1144.5689 | 20 |
| 26 | 2853.4206 | 1427.2139 | 2836.3941 | 1418.7007 | 2835.4101 | 1418.2087 | T | 2219.1091 | 1110.0582 | 2202.0826 | 1101.5449 | 2201.0986 | 1101.0529 | 19 |
| 27 | 2982.4632 | 1491.7352 | 2965.4367 | 1483.2220 | 2964.4527 | 1482.7300 | Q | 2118.0614 | 1059.5344 | 2101.0349 | 1051.0211 | 2100.0509 | 1050.5291 | 18 |
| 28 | 3069.4952 | 1535.2513 | 3052.4687 | 1526.7380 | 3051.4847 | 1526.2460 | S | 1989.0189 | 995.0131  | 1971.9923 | 986.4998  | 1971.0083 | 986.0078  | 17 |
| 29 | 3140.5324 | 1570.7698 | 3123.5058 | 1562.2565 | 3122.5218 | 1561.7645 | A | 1901.9868 | 951.4970  | 1884.9603 | 942.9838  | 1883.9763 | 942.4918  | 16 |
| 30 | 3253.6164 | 1627.3118 | 3236.5899 | 1618.7986 | 3235.6059 | 1618.3066 | I | 1830.9497 | 915.9785  | 1813.9232 | 907.4652  | 1812.9391 | 906.9732  | 15 |
| 31 | 3350.6692 | 1675.8382 | 3333.6426 | 1667.3250 | 3332.6586 | 1666.8329 | P | 1717.8656 | 859.4365  | 1700.8391 | 850.9232  | 1699.8551 | 850.4312  | 14 |
| 32 | 3513.7325 | 1757.3699 | 3496.7060 | 1748.8566 | 3495.7220 | 1748.3646 | Y | 1620.8129 | 810.9101  | 1603.7863 | 802.3968  | 1602.8023 | 801.9048  | 13 |
| 33 | 3584.7696 | 1792.8885 | 3567.7431 | 1784.3752 | 3566.7591 | 1783.8832 | A | 1457.7496 | 729.3784  | 1440.7230 | 720.8651  | 1439.7390 | 720.3731  | 12 |
| 34 | 3697.8537 | 1849.4305 | 3680.8271 | 1840.9172 | 3679.8431 | 1840.4252 | L | 1386.7124 | 693.8599  | 1369.6859 | 685.3466  | 1368.7019 | 684.8546  | 11 |
| 35 | 3853.9548 | 1927.4810 | 3836.9283 | 1918.9678 | 3835.9442 | 1918.4758 | R | 1273.6284 | 637.3178  | 1256.6018 | 628.8046  | 1255.6178 | 628.3125  | 10 |
| 36 | 3953.0232 | 1977.0152 | 3935.9967 | 1968.5020 | 3935.0127 | 1968.0100 | V | 1117.5273 | 559.2673  | 1100.5007 | 550.7540  | 1099.5167 | 550.2620  | 9  |
| 37 | 4082.0658 | 2041.5365 | 4065.0393 | 2033.0233 | 4064.0552 | 2032.5313 | E | 1018.4588 | 509.7331  | 1001.4323 | 501.2198  | 1000.4483 | 500.7278  | 8  |
| 38 | 4195.1499 | 2098.0786 | 4178.1233 | 2089.5653 | 4177.1393 | 2089.0733 | L | 889.4163  | 445.2118  | 872.3897  | 436.6985  | 871.4057  | 436.2065  | 7  |
| 39 | 4324.1925 | 2162.5999 | 4307.1659 | 2154.0866 | 4306.1819 | 2153.5946 | E | 776.3322  | 388.6697  | 759.3056  | 380.1565  | 758.3216  | 379.6645  | 6  |
| 40 | 4439.2194 | 2220.1133 | 4422.1929 | 2211.6001 | 4421.2088 | 2211.1081 | D | 647.2896  | 324.1484  | 630.2631  | 315.6352  | 629.2790  | 315.1432  | 5  |
| 41 | 4625.2987 | 2313.1530 | 4608.2722 | 2304.6397 | 4607.2882 | 2304.1477 | W | 532.2627  | 266.6350  | 515.2361  | 258.1217  |           |           | 4  |
| 42 | 4739.3417 | 2370.1745 | 4722.3151 | 2361.6612 | 4721.3311 | 2361.1692 | N | 346.1833  | 173.5953  | 329.1568  | 165.0820  |           |           | 3  |
| 43 | 4796.3631 | 2398.6852 | 4779.3366 | 2390.1719 | 4778.3526 | 2389.6799 | G | 232.1404  | 116.5738  | 215.1139  | 108.0606  |           |           | 2  |
| 44 |           |           |           |           |           |           | R | 175.1190  | 88.0631   | 158.0924  | 79.5498   |           |           | 1  |

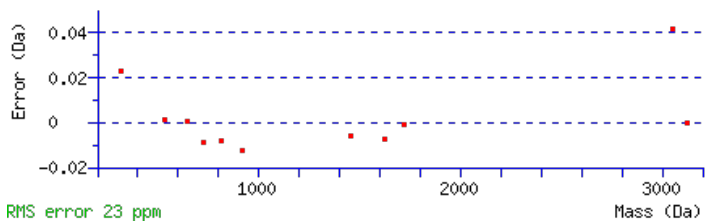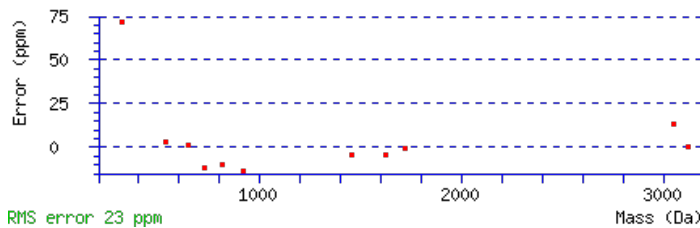

NCBI BLAST search of [EGFGHLSPTGTTEFWLGNEKIHLISTQSAIPYALRVELEDWNGR](#)

(Parameters: blastp, nr protein database, expect=20000, no filter, PAM30)

Other BLAST [web gateways](#)

All matches to this query

| Score | Mr(calc)  | Delta   | Sequence                                                        |
|-------|-----------|---------|-----------------------------------------------------------------|
| 18.9  | 4969.4675 | 2.0173  | <a href="#">EGFGHLSPTGTTEFWLGNEKIHLISTQSAIPYALRVELEDWNGR</a>    |
| 18.9  | 4969.4675 | 2.0173  | <a href="#">EGFGHLSPTGTTEFWLGNEKIHLISTQSAIPYALRVELEDWNGR</a>    |
| 0.2   | 4971.4977 | -0.0130 | <a href="#">IYLESEHGSP LTPRVGIPSGLGAECPSQPPLHGIHIADNNPFNLLR</a> |
| 0.2   | 4971.4977 | -0.0130 | <a href="#">IYLESEHGSP LTPRVGIPSGLGAECPSQPPLHGIHIADNNPFNLLR</a> |
| 0.2   | 4971.4977 | -0.0130 | <a href="#">IYLESEHGSP LTPRVGIPSGLGAECPSQPPLHGIHIADNNPFNLLR</a> |

Mascot: <http://www.matrixscience.com/>

# Mascot Search Results

## Peptide View

MS/MS Fragmentation of **EGFGHLSPTGTTEFWLGNFKIHLISTQSAIPYALRVELEDWNGR**

Found in **P02679** in **uni\_human\_nr**, FIBG\_HUMAN Fibrinogen gamma chain OS=Homo sapiens GN=FGG PE=1 SV=3

Match to Query 23517: 4968.483684 from(829.087890,6+) intensity(2524746.7500) rtinseconds(3375) scans(23536) index(19496)

Title: 130806\_HPL\_Human\_Plaque\_BR2\_TR2\_02\_Spectrum044329\_scans\_23536\_RTINSECONDS=3375

Data file E:\\RAW\\HumanPlaques\\imgf\\T\\1D\\T130806\_HPL\_Human\_Plaque\_BR2\_TR2\_02.mgf

Click mouse within plot area to zoom in by factor of two about that point

Or, to Da  
 Label all possible matches Label matches used for scoring  
 Show Y-axis

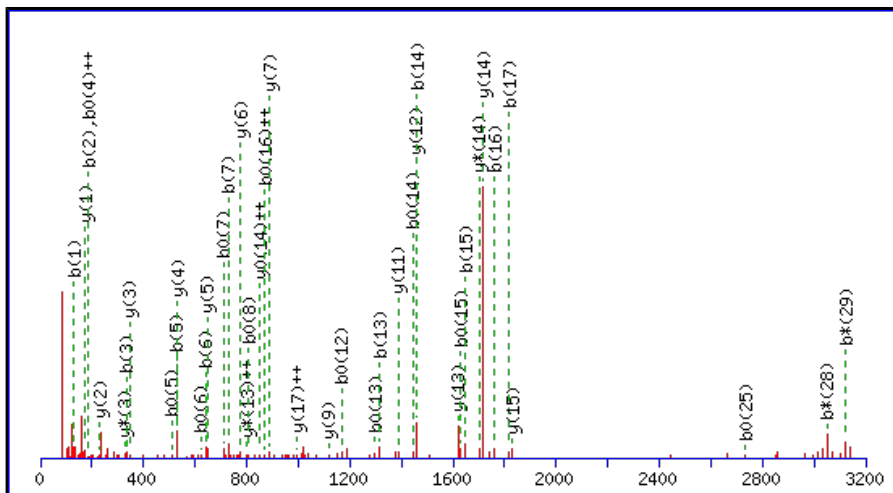

Monoisotopic mass of neutral peptide  $M_r(\text{calc})$ : 4968.4835

Fixed modifications: Carbamidomethyl (C) (apply to specified residues or termini only)

Ions Score: 53 Expect: 0.00026

Matches : 42/474 fragment ions using 110 most intense peaks ([help](#))

| #  | b                | b <sup>++</sup> | b <sup>*</sup> | b <sup>*++</sup> | b <sup>0</sup>   | b <sup>0++</sup> | Seq.     | y         | y <sup>++</sup> | y <sup>*</sup> | y <sup>*++</sup> | y <sup>0</sup> | y <sup>0++</sup> | #         |
|----|------------------|-----------------|----------------|------------------|------------------|------------------|----------|-----------|-----------------|----------------|------------------|----------------|------------------|-----------|
| 1  | <b>130.0499</b>  | 65.5286         |                |                  | 112.0393         | 56.5233          | <b>E</b> |           |                 |                |                  |                |                  | <b>44</b> |
| 2  | <b>187.0713</b>  | 94.0393         |                |                  | 169.0608         | 85.0340          | <b>G</b> | 4840.4482 | 2420.7277       | 4823.4216      | 2412.2145        | 4822.4376      | 2411.7224        | <b>43</b> |
| 3  | <b>334.1397</b>  | 167.5735        |                |                  | 316.1292         | 158.5682         | <b>F</b> | 4783.4267 | 2392.2170       | 4766.4002      | 2383.7037        | 4765.4162      | 2383.2117        | <b>42</b> |
| 4  | 391.1612         | 196.0842        |                |                  | 373.1506         | <b>187.0790</b>  | <b>G</b> | 4636.3583 | 2318.6828       | 4619.3318      | 2310.1695        | 4618.3477      | 2309.6775        | <b>41</b> |
| 5  | <b>528.2201</b>  | 264.6137        |                |                  | <b>510.2096</b>  | 255.6084         | <b>H</b> | 4579.3368 | 2290.1721       | 4562.3103      | 2281.6588        | 4561.3263      | 2281.1668        | <b>40</b> |
| 6  | <b>641.3042</b>  | 321.1557        |                |                  | <b>623.2936</b>  | 312.1504         | <b>L</b> | 4442.2779 | 2221.6426       | 4425.2514      | 2213.1293        | 4424.2674      | 2212.6373        | <b>39</b> |
| 7  | <b>728.3362</b>  | 364.6717        |                |                  | <b>710.3257</b>  | 355.6665         | <b>S</b> | 4329.1939 | 2165.1006       | 4312.1673      | 2156.5873        | 4311.1833      | 2156.0953        | <b>38</b> |
| 8  | 825.3890         | 413.1981        |                |                  | <b>807.3784</b>  | 404.1928         | <b>P</b> | 4242.1618 | 2121.5846       | 4225.1353      | 2113.0713        | 4224.1513      | 2112.5793        | <b>37</b> |
| 9  | 926.4367         | 463.7220        |                |                  | 908.4261         | 454.7167         | <b>T</b> | 4145.1091 | 2073.0582       | 4128.0825      | 2064.5449        | 4127.0985      | 2064.0529        | <b>36</b> |
| 10 | 983.4581         | 492.2327        |                |                  | 965.4476         | 483.2274         | <b>G</b> | 4044.0614 | 2022.5343       | 4027.0348      | 2014.0211        | 4026.0508      | 2013.5291        | <b>35</b> |
| 11 | 1084.5058        | 542.7565        |                |                  | 1066.4952        | 533.7513         | <b>T</b> | 3987.0399 | 1994.0236       | 3970.0134      | 1985.5103        | 3969.0294      | 1985.0183        | <b>34</b> |
| 12 | 1185.5535        | 593.2804        |                |                  | <b>1167.5429</b> | 584.2751         | <b>T</b> | 3885.9923 | 1943.4998       | 3868.9657      | 1934.9865        | 3867.9817      | 1934.4945        | <b>33</b> |
| 13 | <b>1314.5961</b> | 657.8017        |                |                  | <b>1296.5855</b> | 648.7964         | <b>E</b> | 3784.9446 | 1892.9759       | 3767.9180      | 1884.4626        | 3766.9340      | 1883.9706        | <b>32</b> |
| 14 | <b>1461.6645</b> | 731.3359        |                |                  | <b>1443.6539</b> | 722.3306         | <b>F</b> | 3655.9020 | 1828.4546       | 3638.8754      | 1819.9414        | 3637.8914      | 1819.4493        | <b>31</b> |
| 15 | <b>1647.7438</b> | 824.3755        |                |                  | <b>1629.7332</b> | 815.3703         | <b>W</b> | 3508.8336 | 1754.9204       | 3491.8070      | 1746.4071        | 3490.8230      | 1745.9151        | <b>30</b> |
| 16 | <b>1760.8279</b> | 880.9176        |                |                  | 1742.8173        | <b>871.9123</b>  | <b>L</b> | 3322.7543 | 1661.8808       | 3305.7277      | 1653.3675        | 3304.7437      | 1652.8755        | <b>29</b> |
| 17 | <b>1817.8493</b> | 909.4283        |                |                  | 1799.8388        | 900.4230         | <b>G</b> | 3209.6702 | 1605.3387       | 3192.6436      | 1596.8255        | 3191.6596      | 1596.3334        | <b>28</b> |
| 18 | 1931.8923        | 966.4498        | 1914.8657      | 957.9365         | 1913.8817        | 957.4445         | <b>N</b> | 3152.6487 | 1576.8280       | 3135.6222      | 1568.3147        | 3134.6382      | 1567.8227        | <b>27</b> |
| 19 | 2060.9348        | 1030.9711       | 2043.9083      | 1022.4578        | 2042.9243        | 1021.9658        | <b>E</b> | 3038.6058 | 1519.8065       | 3021.5792      | 1511.2933        | 3020.5952      | 1510.8013        | <b>26</b> |



|    |           |           |                  |           |                  |           |          |                  |                 |                  |                 |           |                 |           |
|----|-----------|-----------|------------------|-----------|------------------|-----------|----------|------------------|-----------------|------------------|-----------------|-----------|-----------------|-----------|
| 20 | 2189.0298 | 1095.0185 | 2172.0033        | 1086.5053 | 2171.0192        | 1086.0133 | <b>K</b> | 2909.5632        | 1455.2852       | 2892.5367        | 1446.7720       | 2891.5526 | 1446.2800       | <b>25</b> |
| 21 | 2302.1139 | 1151.5606 | 2285.0873        | 1143.0473 | 2284.1033        | 1142.5553 | <b>I</b> | 2781.4682        | 1391.2378       | 2764.4417        | 1382.7245       | 2763.4577 | 1382.2325       | <b>24</b> |
| 22 | 2439.1728 | 1220.0900 | 2422.1462        | 1211.5768 | 2421.1622        | 1211.0847 | <b>H</b> | 2668.3842        | 1334.6957       | 2651.3576        | 1326.1825       | 2650.3736 | 1325.6904       | <b>23</b> |
| 23 | 2552.2569 | 1276.6321 | 2535.2303        | 1268.1188 | 2534.2463        | 1267.6268 | <b>L</b> | 2531.3253        | 1266.1663       | 2514.2987        | 1257.6530       | 2513.3147 | 1257.1610       | <b>22</b> |
| 24 | 2665.3409 | 1333.1741 | 2648.3144        | 1324.6608 | 2647.3303        | 1324.1688 | <b>I</b> | 2418.2412        | 1209.6242       | 2401.2147        | 1201.1110       | 2400.2306 | 1200.6190       | <b>21</b> |
| 25 | 2752.3729 | 1376.6901 | 2735.3464        | 1368.1768 | <b>2734.3624</b> | 1367.6848 | <b>S</b> | 2305.1571        | 1153.0822       | 2288.1306        | 1144.5689       | 2287.1466 | 1144.0769       | <b>20</b> |
| 26 | 2853.4206 | 1427.2139 | 2836.3941        | 1418.7007 | 2835.4101        | 1418.2087 | <b>T</b> | 2218.1251        | 1109.5662       | 2201.0986        | 1101.0529       | 2200.1145 | 1100.5609       | <b>19</b> |
| 27 | 2981.4792 | 1491.2432 | 2964.4527        | 1482.7300 | 2963.4686        | 1482.2380 | <b>Q</b> | 2117.0774        | 1059.0424       | 2100.0509        | 1050.5291       | 2099.0669 | 1050.0371       | <b>18</b> |
| 28 | 3068.5112 | 1534.7593 | <b>3051.4847</b> | 1526.2460 | 3050.5007        | 1525.7540 | <b>S</b> | 1989.0189        | <b>995.0131</b> | 1971.9923        | 986.4998        | 1971.0083 | 986.0078        | <b>17</b> |
| 29 | 3139.5483 | 1570.2778 | <b>3122.5218</b> | 1561.7645 | 3121.5378        | 1561.2725 | <b>A</b> | 1901.9868        | 951.4970        | 1884.9603        | 942.9838        | 1883.9763 | 942.4918        | <b>16</b> |
| 30 | 3252.6324 | 1626.8198 | 3235.6059        | 1618.3066 | 3234.6218        | 1617.8146 | <b>I</b> | <b>1830.9497</b> | 915.9785        | 1813.9232        | 907.4652        | 1812.9391 | 906.9732        | <b>15</b> |
| 31 | 3349.6852 | 1675.3462 | 3332.6586        | 1666.8329 | 3331.6746        | 1666.3409 | <b>P</b> | <b>1717.8656</b> | 859.4365        | <b>1700.8391</b> | 850.9232        | 1699.8551 | <b>850.4312</b> | <b>14</b> |
| 32 | 3512.7485 | 1756.8779 | 3495.7220        | 1748.3646 | 3494.7379        | 1747.8726 | <b>Y</b> | <b>1620.8129</b> | 810.9101        | 1603.7863        | <b>802.3968</b> | 1602.8023 | 801.9048        | <b>13</b> |
| 33 | 3583.7856 | 1792.3964 | 3566.7591        | 1783.8832 | 3565.7750        | 1783.3912 | <b>A</b> | <b>1457.7496</b> | 729.3784        | 1440.7230        | 720.8651        | 1439.7390 | 720.3731        | <b>12</b> |
| 34 | 3696.8697 | 1848.9385 | 3679.8431        | 1840.4252 | 3678.8591        | 1839.9332 | <b>L</b> | <b>1386.7124</b> | 693.8599        | 1369.6859        | 685.3466        | 1368.7019 | 684.8546        | <b>11</b> |
| 35 | 3852.9708 | 1926.9890 | 3835.9442        | 1918.4758 | 3834.9602        | 1917.9837 | <b>R</b> | 1273.6284        | 637.3178        | 1256.6018        | 628.8046        | 1255.6178 | 628.3125        | <b>10</b> |
| 36 | 3952.0392 | 1976.5232 | 3935.0127        | 1968.0100 | 3934.0286        | 1967.5180 | <b>V</b> | <b>1117.5273</b> | 559.2673        | 1100.5007        | 550.7540        | 1099.5167 | 550.2620        | <b>9</b>  |
| 37 | 4081.0818 | 2041.0445 | 4064.0552        | 2032.5313 | 4063.0712        | 2032.0393 | <b>E</b> | 1018.4588        | 509.7331        | 1001.4323        | 501.2198        | 1000.4483 | 500.7278        | <b>8</b>  |
| 38 | 4194.1659 | 2097.5866 | 4177.1393        | 2089.0733 | 4176.1553        | 2088.5813 | <b>L</b> | <b>889.4163</b>  | 445.2118        | 872.3897         | 436.6985        | 871.4057  | 436.2065        | <b>7</b>  |
| 39 | 4323.2085 | 2162.1079 | 4306.1819        | 2153.5946 | 4305.1979        | 2153.1026 | <b>E</b> | <b>776.3322</b>  | 388.6697        | 759.3056         | 380.1565        | 758.3216  | 379.6645        | <b>6</b>  |
| 40 | 4438.2354 | 2219.6213 | 4421.2088        | 2211.1081 | 4420.2248        | 2210.6161 | <b>D</b> | <b>647.2896</b>  | 324.1484        | 630.2631         | 315.6352        | 629.2790  | 315.1432        | <b>5</b>  |
| 41 | 4624.3147 | 2312.6610 | 4607.2882        | 2304.1477 | 4606.3041        | 2303.6557 | <b>W</b> | <b>532.2627</b>  | 266.6350        | 515.2361         | 258.1217        |           |                 | <b>4</b>  |
| 42 | 4738.3576 | 2369.6825 | 4721.3311        | 2361.1692 | 4720.3471        | 2360.6772 | <b>N</b> | <b>346.1833</b>  | 173.5953        | <b>329.1568</b>  | 165.0820        |           |                 | <b>3</b>  |
| 43 | 4795.3791 | 2398.1932 | 4778.3526        | 2389.6799 | 4777.3685        | 2389.1879 | <b>G</b> | <b>232.1404</b>  | 116.5738        | 215.1139         | 108.0606        |           |                 | <b>2</b>  |
| 44 |           |           |                  |           |                  |           | <b>R</b> | <b>175.1190</b>  | 88.0631         | 158.0924         | 79.5498         |           |                 | <b>1</b>  |

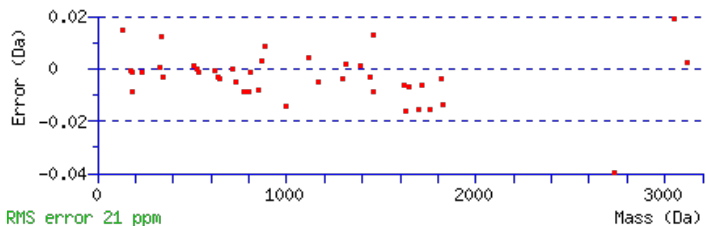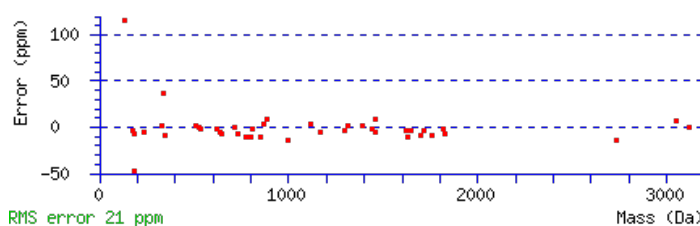

NCBI BLAST search of [EGFGHLSPTGTTEFWLGNEKIHLISTQSAIPYALRVELEDWNGR](#)

(Parameters: blastp, nr protein database, expect=20000, no filter, PAM30)

Other BLAST [web gateways](#)

All matches to this query

| Score | Mr(calcd) | Delta  | Sequence                                                     |
|-------|-----------|--------|--------------------------------------------------------------|
| 52.9  | 4968.4835 | 0.0002 | <a href="#">EGFGHLSPTGTTEFWLGNEKIHLISTQSAIPYALRVELEDWNGR</a> |

Mascot: <http://www.matrixscience.com/>

# Mascot Search Results

## Peptide View

MS/MS Fragmentation of **EGFGHLSPTGTTEFWLGNKIHLISTQSAIPYALRVELEDWNGR**

Found in **P02679** in **uni\_human\_nr**, FIBG\_HUMAN Fibrinogen gamma chain OS=Homo sapiens GN=FGG PE=1 SV=3

Match to Query 23518: 4968.488120 from(994.704900,5+) intensity(1797980.0000) rtinseconds(3373) scans(23522) index(19484)

Title: 130806\_HPL\_Human\_Plaque\_BR2\_TR2\_02\_Spectrum044317\_scans\_23522\_RTINSECONDS=3373

Data file E:\\RAW\\HumanPlaques\\imgf\\T\\1D\\T130806\_HPL\_Human\_Plaque\_BR2\_TR2\_02.mgf

Click mouse within plot area to zoom in by factor of two about that point

Or,  to  Da

Label all possible matches  Label matches used for scoring

Show Y-axis

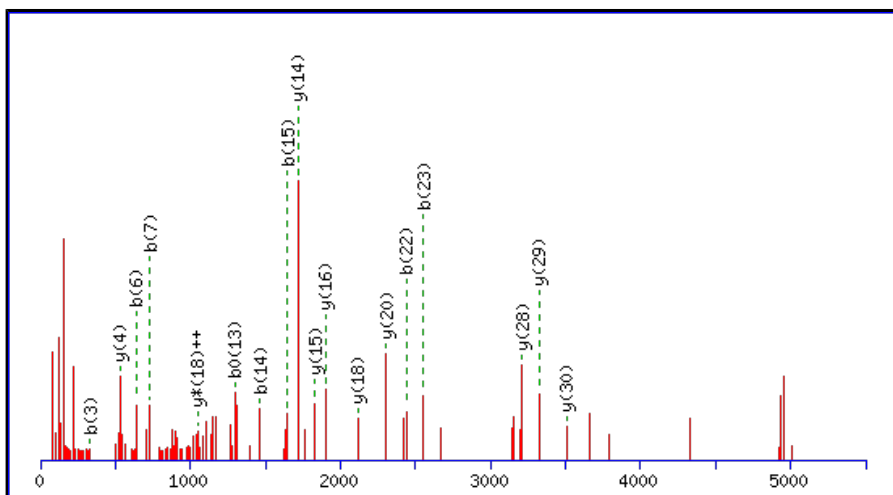

Monoisotopic mass of neutral peptide **Mr(calc): 4968.4835**

Fixed modifications: Carbamidomethyl (C) (apply to specified residues or termini only)

Ions Score: 52 Expect: 0.00031

Matches : 18/474 fragment ions using 30 most intense peaks ([help](#))

| #  | b                | b <sup>++</sup> | b*        | b <sup>***</sup> | b <sup>0</sup>   | b <sup>0++</sup> | Seq. | y                | y <sup>++</sup> | y*        | y <sup>***</sup> | y <sup>0</sup> | y <sup>0++</sup> | #  |
|----|------------------|-----------------|-----------|------------------|------------------|------------------|------|------------------|-----------------|-----------|------------------|----------------|------------------|----|
| 1  | 130.0499         | 65.5286         |           |                  | 112.0393         | 56.5233          | E    |                  |                 |           |                  |                |                  | 44 |
| 2  | 187.0713         | 94.0393         |           |                  | 169.0608         | 85.0340          | G    | 4840.4482        | 2420.7277       | 4823.4216 | 2412.2145        | 4822.4376      | 2411.7224        | 43 |
| 3  | <b>334.1397</b>  | 167.5735        |           |                  | 316.1292         | 158.5682         | F    | 4783.4267        | 2392.2170       | 4766.4002 | 2383.7037        | 4765.4162      | 2383.2117        | 42 |
| 4  | 391.1612         | 196.0842        |           |                  | 373.1506         | 187.0790         | G    | 4636.3583        | 2318.6828       | 4619.3318 | 2310.1695        | 4618.3477      | 2309.6775        | 41 |
| 5  | 528.2201         | 264.6137        |           |                  | 510.2096         | 255.6084         | H    | 4579.3368        | 2290.1721       | 4562.3103 | 2281.6588        | 4561.3263      | 2281.1668        | 40 |
| 6  | <b>641.3042</b>  | 321.1557        |           |                  | 623.2936         | 312.1504         | L    | 4442.2779        | 2221.6426       | 4425.2514 | 2213.1293        | 4424.2674      | 2212.6373        | 39 |
| 7  | <b>728.3362</b>  | 364.6717        |           |                  | 710.3257         | 355.6665         | S    | 4329.1939        | 2165.1006       | 4312.1673 | 2156.5873        | 4311.1833      | 2156.0953        | 38 |
| 8  | 825.3890         | 413.1981        |           |                  | 807.3784         | 404.1928         | P    | 4242.1618        | 2121.5846       | 4225.1353 | 2113.0713        | 4224.1513      | 2112.5793        | 37 |
| 9  | 926.4367         | 463.7220        |           |                  | 908.4261         | 454.7167         | T    | 4145.1091        | 2073.0582       | 4128.0825 | 2064.5449        | 4127.0985      | 2064.0529        | 36 |
| 10 | 983.4581         | 492.2327        |           |                  | 965.4476         | 483.2274         | G    | 4044.0614        | 2022.5343       | 4027.0348 | 2014.0211        | 4026.0508      | 2013.5291        | 35 |
| 11 | 1084.5058        | 542.7565        |           |                  | 1066.4952        | 533.7513         | T    | 3987.0399        | 1994.0236       | 3970.0134 | 1985.5103        | 3969.0294      | 1985.0183        | 34 |
| 12 | 1185.5535        | 593.2804        |           |                  | 1167.5429        | 584.2751         | T    | 3885.9923        | 1943.4998       | 3868.9657 | 1934.9865        | 3867.9817      | 1934.4945        | 33 |
| 13 | 1314.5961        | 657.8017        |           |                  | <b>1296.5855</b> | 648.7964         | E    | 3784.9446        | 1892.9759       | 3767.9180 | 1884.4626        | 3766.9340      | 1883.9706        | 32 |
| 14 | <b>1461.6645</b> | 731.3359        |           |                  | 1443.6539        | 722.3306         | F    | 3655.9020        | 1828.4546       | 3638.8754 | 1819.9414        | 3637.8914      | 1819.4493        | 31 |
| 15 | <b>1647.7438</b> | 824.3755        |           |                  | 1629.7332        | 815.3703         | W    | <b>3508.8336</b> | 1754.9204       | 3491.8070 | 1746.4071        | 3490.8230      | 1745.9151        | 30 |
| 16 | 1760.8279        | 880.9176        |           |                  | 1742.8173        | 871.9123         | L    | <b>3322.7543</b> | 1661.8808       | 3305.7277 | 1653.3675        | 3304.7437      | 1652.8755        | 29 |
| 17 | 1817.8493        | 909.4283        |           |                  | 1799.8388        | 900.4230         | G    | <b>3209.6702</b> | 1605.3387       | 3192.6436 | 1596.8255        | 3191.6596      | 1596.3334        | 28 |
| 18 | 1931.8923        | 966.4498        | 1914.8657 | 957.9365         | 1913.8817        | 957.4445         | N    | 3152.6487        | 1576.8280       | 3135.6222 | 1568.3147        | 3134.6382      | 1567.8227        | 27 |
| 19 | 2060.9348        | 1030.9711       | 2043.9083 | 1022.4578        | 2042.9243        | 1021.9658        | E    | 3038.6058        | 1519.8065       | 3021.5792 | 1511.2933        | 3020.5952      | 1510.8013        | 26 |

|    |                  |           |           |           |           |           |   |                  |           |           |                  |           |           |    |
|----|------------------|-----------|-----------|-----------|-----------|-----------|---|------------------|-----------|-----------|------------------|-----------|-----------|----|
| 20 | 2189.0298        | 1095.0185 | 2172.0033 | 1086.5053 | 2171.0192 | 1086.0133 | K | 2909.5632        | 1455.2852 | 2892.5367 | 1446.7720        | 2891.5526 | 1446.2800 | 25 |
| 21 | 2302.1139        | 1151.5606 | 2285.0873 | 1143.0473 | 2284.1033 | 1142.5553 | I | 2781.4682        | 1391.2378 | 2764.4417 | 1382.7245        | 2763.4577 | 1382.2325 | 24 |
| 22 | <b>2439.1728</b> | 1220.0900 | 2422.1462 | 1211.5768 | 2421.1622 | 1211.0847 | H | 2668.3842        | 1334.6957 | 2651.3576 | 1326.1825        | 2650.3736 | 1325.6904 | 23 |
| 23 | <b>2552.2569</b> | 1276.6321 | 2535.2303 | 1268.1188 | 2534.2463 | 1267.6268 | L | 2531.3253        | 1266.1663 | 2514.2987 | 1257.6530        | 2513.3147 | 1257.1610 | 22 |
| 24 | 2665.3409        | 1333.1741 | 2648.3144 | 1324.6608 | 2647.3303 | 1324.1688 | I | 2418.2412        | 1209.6242 | 2401.2147 | 1201.1110        | 2400.2306 | 1200.6190 | 21 |
| 25 | 2752.3729        | 1376.6901 | 2735.3464 | 1368.1768 | 2734.3624 | 1367.6848 | S | <b>2305.1571</b> | 1153.0822 | 2288.1306 | 1144.5689        | 2287.1466 | 1144.0769 | 20 |
| 26 | 2853.4206        | 1427.2139 | 2836.3941 | 1418.7007 | 2835.4101 | 1418.2087 | T | 2218.1251        | 1109.5662 | 2201.0986 | 1101.0529        | 2200.1145 | 1100.5609 | 19 |
| 27 | 2981.4792        | 1491.2432 | 2964.4527 | 1482.7300 | 2963.4686 | 1482.2380 | Q | <b>2117.0774</b> | 1059.0424 | 2100.0509 | <b>1050.5291</b> | 2099.0669 | 1050.0371 | 18 |
| 28 | 3068.5112        | 1534.7593 | 3051.4847 | 1526.2460 | 3050.5007 | 1525.7540 | S | 1989.0189        | 995.0131  | 1971.9923 | 986.4998         | 1971.0083 | 986.0078  | 17 |
| 29 | 3139.5483        | 1570.2778 | 3122.5218 | 1561.7645 | 3121.5378 | 1561.2725 | A | <b>1901.9868</b> | 951.4970  | 1884.9603 | 942.9838         | 1883.9763 | 942.4918  | 16 |
| 30 | 3252.6324        | 1626.8198 | 3235.6059 | 1618.3066 | 3234.6218 | 1617.8146 | I | <b>1830.9497</b> | 915.9785  | 1813.9232 | 907.4652         | 1812.9391 | 906.9732  | 15 |
| 31 | 3349.6852        | 1675.3462 | 3332.6586 | 1666.8329 | 3331.6746 | 1666.3409 | P | <b>1717.8656</b> | 859.4365  | 1700.8391 | 850.9232         | 1699.8551 | 850.4312  | 14 |
| 32 | 3512.7485        | 1756.8779 | 3495.7220 | 1748.3646 | 3494.7379 | 1747.8726 | Y | 1620.8129        | 810.9101  | 1603.7863 | 802.3968         | 1602.8023 | 801.9048  | 13 |
| 33 | 3583.7856        | 1792.3964 | 3566.7591 | 1783.8832 | 3565.7750 | 1783.3912 | A | 1457.7496        | 729.3784  | 1440.7230 | 720.8651         | 1439.7390 | 720.3731  | 12 |
| 34 | 3696.8697        | 1848.9385 | 3679.8431 | 1840.4252 | 3678.8591 | 1839.9332 | L | 1386.7124        | 693.8599  | 1369.6859 | 685.3466         | 1368.7019 | 684.8546  | 11 |
| 35 | 3852.9708        | 1926.9890 | 3835.9442 | 1918.4758 | 3834.9602 | 1917.9837 | R | 1273.6284        | 637.3178  | 1256.6018 | 628.8046         | 1255.6178 | 628.3125  | 10 |
| 36 | 3952.0392        | 1976.5232 | 3935.0127 | 1968.0100 | 3934.0286 | 1967.5180 | V | 1117.5273        | 559.2673  | 1100.5007 | 550.7540         | 1099.5167 | 550.2620  | 9  |
| 37 | 4081.0818        | 2041.0445 | 4064.0552 | 2032.5313 | 4063.0712 | 2032.0393 | E | 1018.4588        | 509.7331  | 1001.4323 | 501.2198         | 1000.4483 | 500.7278  | 8  |
| 38 | 4194.1659        | 2097.5866 | 4177.1393 | 2089.0733 | 4176.1553 | 2088.5813 | L | 889.4163         | 445.2118  | 872.3897  | 436.6985         | 871.4057  | 436.2065  | 7  |
| 39 | 4323.2085        | 2162.1079 | 4306.1819 | 2153.5946 | 4305.1979 | 2153.1026 | E | 776.3322         | 388.6697  | 759.3056  | 380.1565         | 758.3216  | 379.6645  | 6  |
| 40 | 4438.2354        | 2219.6213 | 4421.2088 | 2211.1081 | 4420.2248 | 2210.6161 | D | 647.2896         | 324.1484  | 630.2631  | 315.6352         | 629.2790  | 315.1432  | 5  |
| 41 | 4624.3147        | 2312.6610 | 4607.2882 | 2304.1477 | 4606.3041 | 2303.6557 | W | <b>532.2627</b>  | 266.6350  | 515.2361  | 258.1217         |           |           | 4  |
| 42 | 4738.3576        | 2369.6825 | 4721.3311 | 2361.1692 | 4720.3471 | 2360.6772 | N | 346.1833         | 173.5953  | 329.1568  | 165.0820         |           |           | 3  |
| 43 | 4795.3791        | 2398.1932 | 4778.3526 | 2389.6799 | 4777.3685 | 2389.1879 | G | 232.1404         | 116.5738  | 215.1139  | 108.0606         |           |           | 2  |
| 44 |                  |           |           |           |           |           | R | 175.1190         | 88.0631   | 158.0924  | 79.5498          |           |           | 1  |

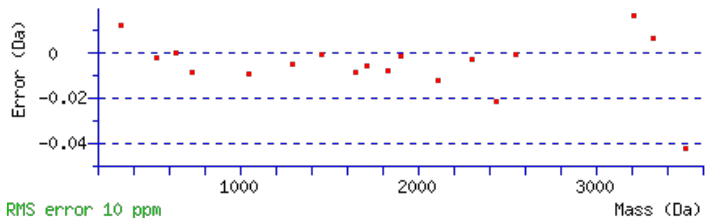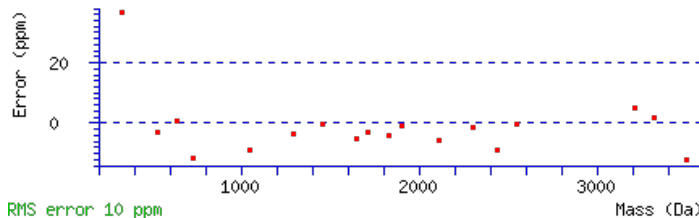

NCBI BLAST search of [EGFGHLSPTGTTEFWLGNEKIHLISTQSAIPYALRVELEDWNGR](#)

(Parameters: blastp, nr protein database, expect=20000, no filter, PAM30)

Other BLAST [web gateways](#)

All matches to this query

| Score | Mr(calcd) | Delta  | Sequence                                                     |
|-------|-----------|--------|--------------------------------------------------------------|
| 52.0  | 4968.4835 | 0.0046 | <a href="#">EGFGHLSPTGTTEFWLGNEKIHLISTQSAIPYALRVELEDWNGR</a> |

Mascot: <http://www.matrixscience.com/>

# Mascot Search Results

## Peptide View

MS/MS Fragmentation of **IHLISTQSAIPYALRVELEDWNGR**

Found in **P02679** in **uni\_human\_nr**, FIBG\_HUMAN Fibrinogen gamma chain OS=Homo sapiens GN=FGG PE=1 SV=3

Match to Query 16382: 2781.438456 from(696.366890,4+) intensity(0.0000) rtinseconds(3071) scans(20267) index(16663)

Title: 130809\_HPL\_Human\_Plaque\_BR2\_TR3\_03\_Spectrum040451\_scans\_20267\_RTINSECONDS=3071

Data file E:\\RAW\\HumanPlaques\\imgf\\T\\1D\\T130809\_HPL\_Human\_Plaque\_BR2\_TR3\_03.mgf

Click mouse within plot area to zoom in by factor of two about that point

Or,  to  Da

Label all possible matches  Label matches used for scoring

Show Y-axis

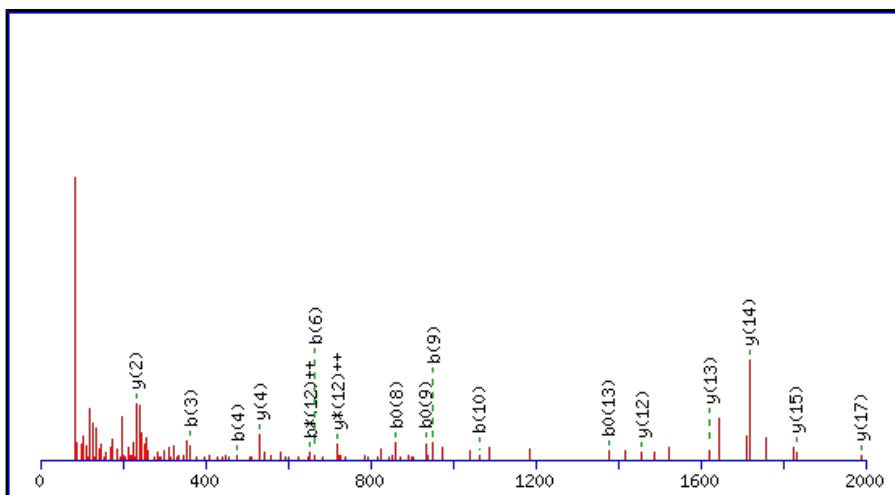

Monoisotopic mass of neutral peptide **Mr(calc): 2781.4449**

Fixed modifications: Carbamidomethyl (C) (apply to specified residues or termini only)

Variable modifications:

N22 : Deamidated (NQ)

Ions Score: 30 Expect: 0.064

Matches : 17/248 fragment ions using 35 most intense peaks ([help](#))

| #  | b                | b <sup>++</sup> | b <sup>*</sup> | b <sup>*++</sup> | b <sup>0</sup>   | b <sup>0++</sup> | Seq. | y                | y <sup>++</sup> | y <sup>*</sup> | y <sup>*++</sup> | y <sup>0</sup> | y <sup>0++</sup> | #  |
|----|------------------|-----------------|----------------|------------------|------------------|------------------|------|------------------|-----------------|----------------|------------------|----------------|------------------|----|
| 1  | 114.0913         | 57.5493         |                |                  |                  |                  | I    |                  |                 |                |                  |                |                  | 24 |
| 2  | 251.1503         | 126.0788        |                |                  |                  |                  | H    | 2669.3682        | 1335.1877       | 2652.3416      | 1326.6745        | 2651.3576      | 1326.1825        | 23 |
| 3  | <b>364.2343</b>  | 182.6208        |                |                  |                  |                  | L    | 2532.3093        | 1266.6583       | 2515.2827      | 1258.1450        | 2514.2987      | 1257.6530        | 22 |
| 4  | <b>477.3184</b>  | 239.1628        |                |                  |                  |                  | I    | 2419.2252        | 1210.1162       | 2402.1987      | 1201.6030        | 2401.2147      | 1201.1110        | 21 |
| 5  | 564.3504         | 282.6788        |                |                  | 546.3398         | 273.6736         | S    | 2306.1412        | 1153.5742       | 2289.1146      | 1145.0609        | 2288.1306      | 1144.5689        | 20 |
| 6  | <b>665.3981</b>  | 333.2027        |                |                  | 647.3875         | 324.1974         | T    | 2219.1091        | 1110.0582       | 2202.0826      | 1101.5449        | 2201.0986      | 1101.0529        | 19 |
| 7  | 793.4567         | 397.2320        | 776.4301       | 388.7187         | 775.4461         | 388.2267         | Q    | 2118.0614        | 1059.5344       | 2101.0349      | 1051.0211        | 2100.0509      | 1050.5291        | 18 |
| 8  | 880.4887         | 440.7480        | 863.4621       | 432.2347         | <b>862.4781</b>  | 431.7427         | S    | <b>1990.0029</b> | 995.5051        | 1972.9763      | 986.9918         | 1971.9923      | 986.4998         | 17 |
| 9  | <b>951.5258</b>  | 476.2665        | 934.4993       | 467.7533         | <b>933.5152</b>  | 467.2613         | A    | 1902.9708        | 951.9891        | 1885.9443      | 943.4758         | 1884.9603      | 942.9838         | 16 |
| 10 | <b>1064.6099</b> | 532.8086        | 1047.5833      | 524.2953         | 1046.5993        | 523.8033         | I    | <b>1831.9337</b> | 916.4705        | 1814.9072      | 907.9572         | 1813.9232      | 907.4652         | 15 |
| 11 | 1161.6626        | 581.3350        | 1144.6361      | 572.8217         | 1143.6521        | 572.3297         | P    | <b>1718.8497</b> | 859.9285        | 1701.8231      | 851.4152         | 1700.8391      | 850.9232         | 14 |
| 12 | 1324.7260        | 662.8666        | 1307.6994      | <b>654.3533</b>  | 1306.7154        | 653.8613         | Y    | <b>1621.7969</b> | 811.4021        | 1604.7703      | 802.8888         | 1603.7863      | 802.3968         | 13 |
| 13 | 1395.7631        | 698.3852        | 1378.7365      | 689.8719         | <b>1377.7525</b> | 689.3799         | A    | <b>1458.7336</b> | 729.8704        | 1441.7070      | <b>721.3571</b>  | 1440.7230      | 720.8651         | 12 |
| 14 | 1508.8471        | 754.9272        | 1491.8206      | 746.4139         | 1490.8366        | 745.9219         | L    | 1387.6965        | 694.3519        | 1370.6699      | 685.8386         | 1369.6859      | 685.3466         | 11 |
| 15 | 1664.9483        | 832.9778        | 1647.9217      | 824.4645         | 1646.9377        | 823.9725         | R    | 1274.6124        | 637.8098        | 1257.5858      | 629.2966         | 1256.6018      | 628.8046         | 10 |
| 16 | 1764.0167        | 882.5120        | 1746.9901      | 873.9987         | 1746.0061        | 873.5067         | V    | 1118.5113        | 559.7593        | 1101.4847      | 551.2460         | 1100.5007      | 550.7540         | 9  |
| 17 | 1893.0593        | 947.0333        | 1876.0327      | 938.5200         | 1875.0487        | 938.0280         | E    | 1019.4429        | 510.2251        | 1002.4163      | 501.7118         | 1001.4323      | 501.2198         | 8  |
| 18 | 2006.1433        | 1003.5753       | 1989.1168      | 995.0620         | 1988.1328        | 994.5700         | L    | 890.4003         | 445.7038        | 873.3737       | 437.1905         | 872.3897       | 436.6985         | 7  |

|    |           |           |           |           |           |           |   |          |          |          |          |          |          |   |
|----|-----------|-----------|-----------|-----------|-----------|-----------|---|----------|----------|----------|----------|----------|----------|---|
| 19 | 2135.1859 | 1068.0966 | 2118.1594 | 1059.5833 | 2117.1754 | 1059.0913 | E | 777.3162 | 389.1617 | 760.2897 | 380.6485 | 759.3056 | 380.1565 | 6 |
| 20 | 2250.2129 | 1125.6101 | 2233.1863 | 1117.0968 | 2232.2023 | 1116.6048 | D | 648.2736 | 324.6404 | 631.2471 | 316.1272 | 630.2630 | 315.6352 | 5 |
| 21 | 2436.2922 | 1218.6497 | 2419.2656 | 1210.1364 | 2418.2816 | 1209.6444 | W | 533.2467 | 267.1270 | 516.2201 | 258.6137 |          |          | 4 |
| 22 | 2551.3191 | 1276.1632 | 2534.2926 | 1267.6499 | 2533.3086 | 1267.1579 | N | 347.1674 | 174.0873 | 330.1408 | 165.5740 |          |          | 3 |
| 23 | 2608.3406 | 1304.6739 | 2591.3140 | 1296.1607 | 2590.3300 | 1295.6686 | G | 232.1404 | 116.5738 | 215.1139 | 108.0606 |          |          | 2 |
| 24 |           |           |           |           |           |           | R | 175.1190 | 88.0631  | 158.0924 | 79.5498  |          |          | 1 |

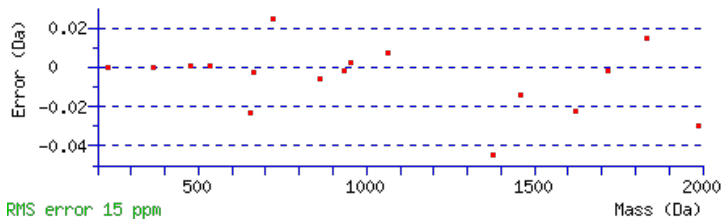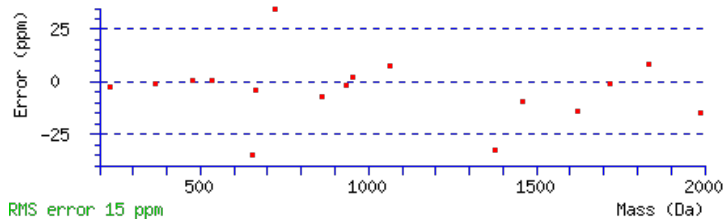

NCBI BLAST search of [IHLISTQSAIPYALRVELEDWNGR](#)  
 (Parameters: blastp, nr protein database, expect=20000, no filter, PAM30)  
 Other BLAST [web gateways](#)

All matches to this query

| Score | Mr(calc)  | Delta   | Sequence                                 |
|-------|-----------|---------|------------------------------------------|
| 30.3  | 2781.4449 | -0.0065 | <a href="#">IHLISTQSAIPYALRVELEDWNGR</a> |

Mascot: <http://www.matrixscience.com/>

# Mascot Search Results

## Peptide View

MS/MS Fragmentation of **IHLISTQSAIPYALRVELEDWNGR**

Found in **P02679** in **uni\_human\_nr**, FIBG\_HUMAN Fibrinogen gamma chain OS=Homo sapiens GN=FGG PE=1 SV=3

Match to Query 16838: 2780.463642 from(927.828490,3+) intensity(22824230.0000) rtinseconds(2879) scans(19863) index(16264)

Title: 130809\_HPL\_Human\_Plaque\_BR2\_TR3\_02\_Spectrum041117\_scans\_\_19863\_RTINSECONDS=2879

Data file E:\\RAW\\HumanPlaques\\mgf\\T\\1D\\T130809\_HPL\_Human\_Plaque\_BR2\_TR3\_02.mgf

Click mouse within plot area to zoom in by factor of two about that point

Or,  to  Da  
 Label all possible matches  Label matches used for scoring   
 Show Y-axis

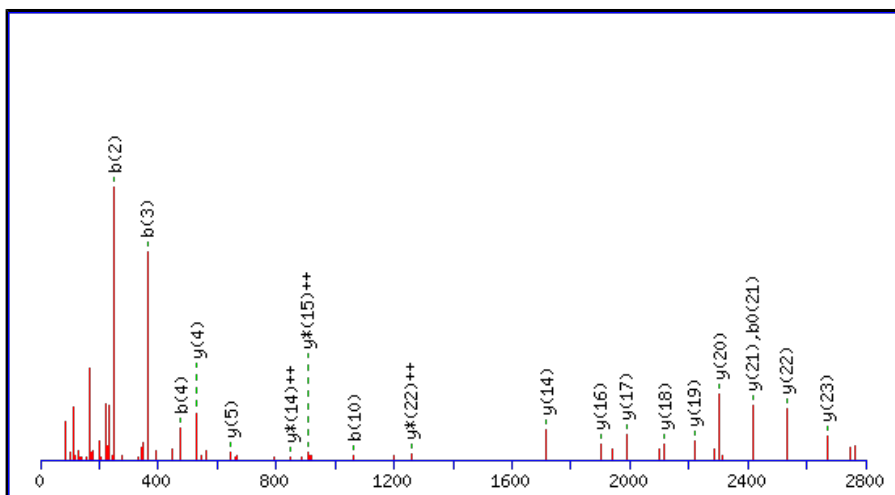

Monoisotopic mass of neutral peptide Mr(calc): 2780.4609

Fixed modifications: Carbamidomethyl (C) (apply to specified residues or termini only)

Ions Score: 97 Expect: 1.2e-008

Matches : 19/248 fragment ions using 20 most intense peaks ([help](#))

| #  | b                | b <sup>++</sup> | b*        | b <sup>***</sup> | b <sup>0</sup> | b <sup>0++</sup> | Seq. | y                | y <sup>++</sup> | y*        | y <sup>***</sup> | y <sup>0</sup> | y <sup>0++</sup> | #  |
|----|------------------|-----------------|-----------|------------------|----------------|------------------|------|------------------|-----------------|-----------|------------------|----------------|------------------|----|
| 1  | 114.0913         | 57.5493         |           |                  |                |                  | I    |                  |                 |           |                  |                |                  | 24 |
| 2  | <b>251.1503</b>  | 126.0788        |           |                  |                |                  | H    | <b>2668.3842</b> | 1334.6957       | 2651.3576 | 1326.1825        | 2650.3736      | 1325.6904        | 23 |
| 3  | <b>364.2343</b>  | 182.6208        |           |                  |                |                  | L    | <b>2531.3253</b> | 1266.1663       | 2514.2987 | <b>1257.6530</b> | 2513.3147      | 1257.1610        | 22 |
| 4  | <b>477.3184</b>  | 239.1628        |           |                  |                |                  | I    | <b>2418.2412</b> | 1209.6242       | 2401.2147 | 1201.1110        | 2400.2306      | 1200.6190        | 21 |
| 5  | 564.3504         | 282.6788        |           |                  | 546.3398       | 273.6736         | S    | <b>2305.1571</b> | 1153.0822       | 2288.1306 | 1144.5689        | 2287.1466      | 1144.0769        | 20 |
| 6  | 665.3981         | 333.2027        |           |                  | 647.3875       | 324.1974         | T    | <b>2218.1251</b> | 1109.5662       | 2201.0986 | 1101.0529        | 2200.1145      | 1100.5609        | 19 |
| 7  | 793.4567         | 397.2320        | 776.4301  | 388.7187         | 775.4461       | 388.2267         | Q    | <b>2117.0774</b> | 1059.0424       | 2100.0509 | 1050.5291        | 2099.0669      | 1050.0371        | 18 |
| 8  | 880.4887         | 440.7480        | 863.4621  | 432.2347         | 862.4781       | 431.7427         | S    | <b>1989.0189</b> | 995.0131        | 1971.9923 | 986.4998         | 1971.0083      | 986.0078         | 17 |
| 9  | 951.5258         | 476.2665        | 934.4993  | 467.7533         | 933.5152       | 467.2613         | A    | <b>1901.9868</b> | 951.4970        | 1884.9603 | 942.9838         | 1883.9763      | 942.4918         | 16 |
| 10 | <b>1064.6099</b> | 532.8086        | 1047.5833 | 524.2953         | 1046.5993      | 523.8033         | I    | 1830.9497        | 915.9785        | 1813.9232 | <b>907.4652</b>  | 1812.9391      | 906.9732         | 15 |
| 11 | 1161.6626        | 581.3350        | 1144.6361 | 572.8217         | 1143.6521      | 572.3297         | P    | <b>1717.8656</b> | 859.4365        | 1700.8391 | <b>850.9232</b>  | 1699.8551      | 850.4312         | 14 |
| 12 | 1324.7260        | 662.8666        | 1307.6994 | 654.3533         | 1306.7154      | 653.8613         | Y    | 1620.8129        | 810.9101        | 1603.7863 | 802.3968         | 1602.8023      | 801.9048         | 13 |
| 13 | 1395.7631        | 698.3852        | 1378.7365 | 689.8719         | 1377.7525      | 689.3799         | A    | 1457.7496        | 729.3784        | 1440.7230 | 720.8651         | 1439.7390      | 720.3731         | 12 |
| 14 | 1508.8471        | 754.9272        | 1491.8206 | 746.4139         | 1490.8366      | 745.9219         | L    | 1386.7124        | 693.8599        | 1369.6859 | 685.3466         | 1368.7019      | 684.8546         | 11 |
| 15 | 1664.9483        | 832.9778        | 1647.9217 | 824.4645         | 1646.9377      | 823.9725         | R    | 1273.6284        | 637.3178        | 1256.6018 | 628.8046         | 1255.6178      | 628.3125         | 10 |
| 16 | 1764.0167        | 882.5120        | 1746.9901 | 873.9987         | 1746.0061      | 873.5067         | V    | 1117.5273        | 559.2673        | 1100.5007 | 550.7540         | 1099.5167      | 550.2620         | 9  |
| 17 | 1893.0593        | 947.0333        | 1876.0327 | 938.5200         | 1875.0487      | 938.0280         | E    | 1018.4588        | 509.7331        | 1001.4323 | 501.2198         | 1000.4483      | 500.7278         | 8  |
| 18 | 2006.1433        | 1003.5753       | 1989.1168 | 995.0620         | 1988.1328      | 994.5700         | L    | 889.4163         | 445.2118        | 872.3897  | 436.6985         | 871.4057       | 436.2065         | 7  |
| 19 | 2135.1859        | 1068.0966       | 2118.1594 | 1059.5833        | 2117.1754      | 1059.0913        | E    | 776.3322         | 388.6697        | 759.3056  | 380.1565         | 758.3216       | 379.6645         | 6  |

|    |           |           |           |           |           |           |   |          |          |          |          |          |          |   |
|----|-----------|-----------|-----------|-----------|-----------|-----------|---|----------|----------|----------|----------|----------|----------|---|
| 20 | 2250.2129 | 1125.6101 | 2233.1863 | 1117.0968 | 2232.2023 | 1116.6048 | D | 647.2896 | 324.1484 | 630.2630 | 315.6352 | 629.2790 | 315.1432 | 5 |
| 21 | 2436.2922 | 1218.6497 | 2419.2656 | 1210.1364 | 2418.2816 | 1209.6444 | W | 532.2627 | 266.6350 | 515.2361 | 258.1217 |          |          | 4 |
| 22 | 2550.3351 | 1275.6712 | 2533.3086 | 1267.1579 | 2532.3245 | 1266.6659 | N | 346.1833 | 173.5953 | 329.1568 | 165.0820 |          |          | 3 |
| 23 | 2607.3566 | 1304.1819 | 2590.3300 | 1295.6686 | 2589.3460 | 1295.1766 | G | 232.1404 | 116.5738 | 215.1139 | 108.0606 |          |          | 2 |
| 24 |           |           |           |           |           |           | R | 175.1190 | 88.0631  | 158.0924 | 79.5498  |          |          | 1 |

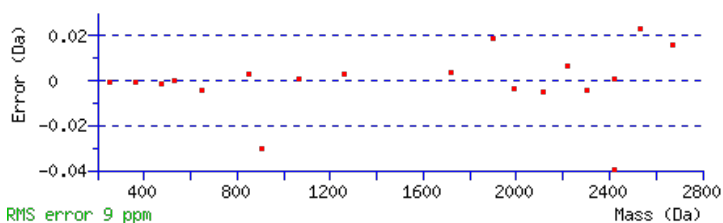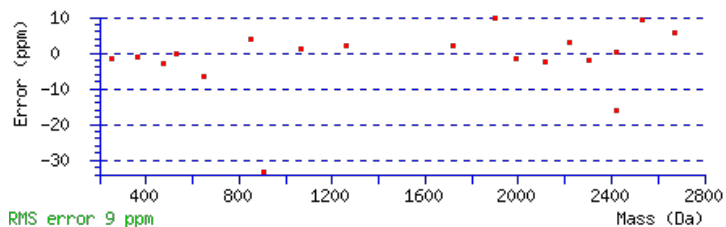

NCBI **BLAST** search of [IHLISTQSAIPYALRVELEDWNGR](#)  
 (Parameters: blastp, nr protein database, expect=20000, no filter, PAM30)

Other BLAST [web gateways](#)

**All matches to this query**

| Score | Mr(calc)  | Delta   | Sequence                                 |
|-------|-----------|---------|------------------------------------------|
| 96.7  | 2780.4609 | 0.0027  | <a href="#">IHLISTQSAIPYALRVELEDWNGR</a> |
| 7.2   | 2780.4677 | -0.0040 | <a href="#">HILLRPTMQTLAPEVKTMTRDGEK</a> |
| 6.9   | 2780.4677 | -0.0040 | <a href="#">HILLRPTMQTLAPEVKTMTRDGEK</a> |

Mascot: <http://www.matrixscience.com/>

# Mascot Search Results

## Peptide View

MS/MS Fragmentation of **IHLISTQSAIPYALRVELEDWNGR**

Found in **P02679** in **uni\_human\_nr**, FIBG\_HUMAN Fibrinogen gamma chain OS=Homo sapiens GN=FGG PE=1 SV=3

Match to Query 16814: 2780.461376 from(696.122620,4+) intensity(48521944.0000) rtinseconds(2907) scans(19975) index(16367)

Title: 130806\_HPL\_Human\_Plaque\_BR2\_TR2\_02\_Spectrum041200\_scans\_\_19975\_RTINSECONDS=2907

Data file E:\\RAW\\HumanPlaques\\imgf\\T\\1D\\T130806\_HPL\_Human\_Plaque\_BR2\_TR2\_02.mgf

Click mouse within plot area to zoom in by factor of two about that point

Or,  to  Da  
 Label all possible matches  Label matches used for scoring   
 Show Y-axis

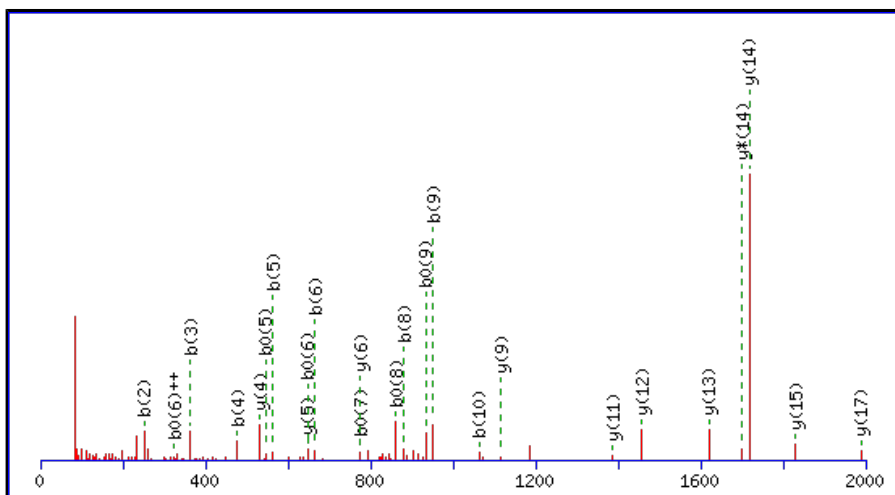

Monoisotopic mass of neutral peptide **Mr(calc): 2780.4609**

Fixed modifications: Carbamidomethyl (C) (apply to specified residues or termini only)

Ions Score: 86 Expect: 1.6e-007

Matches : 25/248 fragment ions using 39 most intense peaks ([help](#))

| #  | b                | b <sup>++</sup> | b*        | b <sup>*++</sup> | b <sup>0</sup> | b <sup>0++</sup> | Seq. | y                | y <sup>++</sup> | y*               | y <sup>*++</sup> | y <sup>0</sup> | y <sup>0++</sup> | #  |
|----|------------------|-----------------|-----------|------------------|----------------|------------------|------|------------------|-----------------|------------------|------------------|----------------|------------------|----|
| 1  | 114.0913         | 57.5493         |           |                  |                |                  | I    |                  |                 |                  |                  |                |                  | 24 |
| 2  | <b>251.1503</b>  | 126.0788        |           |                  |                |                  | H    | 2668.3842        | 1334.6957       | 2651.3576        | 1326.1825        | 2650.3736      | 1325.6904        | 23 |
| 3  | <b>364.2343</b>  | 182.6208        |           |                  |                |                  | L    | 2531.3253        | 1266.1663       | 2514.2987        | 1257.6530        | 2513.3147      | 1257.1610        | 22 |
| 4  | <b>477.3184</b>  | 239.1628        |           |                  |                |                  | I    | 2418.2412        | 1209.6242       | 2401.2147        | 1201.1110        | 2400.2306      | 1200.6190        | 21 |
| 5  | <b>564.3504</b>  | 282.6788        |           |                  | 546.3398       | 273.6736         | S    | 2305.1571        | 1153.0822       | 2288.1306        | 1144.5689        | 2287.1466      | 1144.0769        | 20 |
| 6  | <b>665.3981</b>  | 333.2027        |           |                  | 647.3875       | 324.1974         | T    | 2218.1251        | 1109.5662       | 2201.0986        | 1101.0529        | 2200.1145      | 1100.5609        | 19 |
| 7  | 793.4567         | 397.2320        | 776.4301  | 388.7187         | 775.4461       | 388.2267         | Q    | 2117.0774        | 1059.0424       | 2100.0509        | 1050.5291        | 2099.0669      | 1050.0371        | 18 |
| 8  | <b>880.4887</b>  | 440.7480        | 863.4621  | 432.2347         | 862.4781       | 431.7427         | S    | <b>1989.0189</b> | 995.0131        | 1971.9923        | 986.4998         | 1971.0083      | 986.0078         | 17 |
| 9  | <b>951.5258</b>  | 476.2665        | 934.4993  | 467.7533         | 933.5152       | 467.2613         | A    | 1901.9868        | 951.4970        | 1884.9603        | 942.9838         | 1883.9763      | 942.4918         | 16 |
| 10 | <b>1064.6099</b> | 532.8086        | 1047.5833 | 524.2953         | 1046.5993      | 523.8033         | I    | <b>1830.9497</b> | 915.9785        | 1813.9232        | 907.4652         | 1812.9391      | 906.9732         | 15 |
| 11 | 1161.6626        | 581.3350        | 1144.6361 | 572.8217         | 1143.6521      | 572.3297         | P    | <b>1717.8656</b> | 859.4365        | <b>1700.8391</b> | 850.9232         | 1699.8551      | 850.4312         | 14 |
| 12 | 1324.7260        | 662.8666        | 1307.6994 | 654.3533         | 1306.7154      | 653.8613         | Y    | <b>1620.8129</b> | 810.9101        | 1603.7863        | 802.3968         | 1602.8023      | 801.9048         | 13 |
| 13 | 1395.7631        | 698.3852        | 1378.7365 | 689.8719         | 1377.7525      | 689.3799         | A    | <b>1457.7496</b> | 729.3784        | 1440.7230        | 720.8651         | 1439.7390      | 720.3731         | 12 |
| 14 | 1508.8471        | 754.9272        | 1491.8206 | 746.4139         | 1490.8366      | 745.9219         | L    | <b>1386.7124</b> | 693.8599        | 1369.6859        | 685.3466         | 1368.7019      | 684.8546         | 11 |
| 15 | 1664.9483        | 832.9778        | 1647.9217 | 824.4645         | 1646.9377      | 823.9725         | R    | 1273.6284        | 637.3178        | 1256.6018        | 628.8046         | 1255.6178      | 628.3125         | 10 |
| 16 | 1764.0167        | 882.5120        | 1746.9901 | 873.9987         | 1746.0061      | 873.5067         | V    | <b>1117.5273</b> | 559.2673        | 1100.5007        | 550.7540         | 1099.5167      | 550.2620         | 9  |
| 17 | 1893.0593        | 947.0333        | 1876.0327 | 938.5200         | 1875.0487      | 938.0280         | E    | 1018.4588        | 509.7331        | 1001.4323        | 501.2198         | 1000.4483      | 500.7278         | 8  |
| 18 | 2006.1433        | 1003.5753       | 1989.1168 | 995.0620         | 1988.1328      | 994.5700         | L    | 889.4163         | 445.2118        | 872.3897         | 436.6985         | 871.4057       | 436.2065         | 7  |
| 19 | 2135.1859        | 1068.0966       | 2118.1594 | 1059.5833        | 2117.1754      | 1059.0913        | E    | <b>776.3322</b>  | 388.6697        | 759.3056         | 380.1565         | 758.3216       | 379.6645         | 6  |



|    |           |           |           |           |           |           |   |          |          |          |          |          |          |   |
|----|-----------|-----------|-----------|-----------|-----------|-----------|---|----------|----------|----------|----------|----------|----------|---|
| 20 | 2250.2129 | 1125.6101 | 2233.1863 | 1117.0968 | 2232.2023 | 1116.6048 | D | 647.2896 | 324.1484 | 630.2630 | 315.6352 | 629.2790 | 315.1432 | 5 |
| 21 | 2436.2922 | 1218.6497 | 2419.2656 | 1210.1364 | 2418.2816 | 1209.6444 | W | 532.2627 | 266.6350 | 515.2361 | 258.1217 |          |          | 4 |
| 22 | 2550.3351 | 1275.6712 | 2533.3086 | 1267.1579 | 2532.3245 | 1266.6659 | N | 346.1833 | 173.5953 | 329.1568 | 165.0820 |          |          | 3 |
| 23 | 2607.3566 | 1304.1819 | 2590.3300 | 1295.6686 | 2589.3460 | 1295.1766 | G | 232.1404 | 116.5738 | 215.1139 | 108.0606 |          |          | 2 |
| 24 |           |           |           |           |           |           | R | 175.1190 | 88.0631  | 158.0924 | 79.5498  |          |          | 1 |

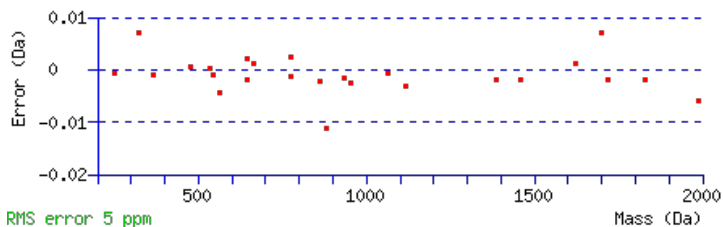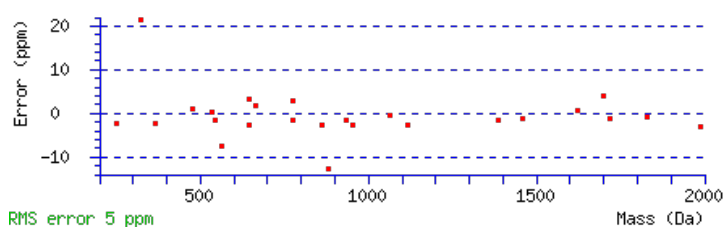

NCBI **BLAST** search of [IHLISTQSAIPYALRVELEDWNGR](#)  
 (Parameters: blastp, nr protein database, expect=20000, no filter, PAM30)  
 Other BLAST [web gateways](#)

**All matches to this query**

| Score | Mr(calc)  | Delta  | Sequence                                 |
|-------|-----------|--------|------------------------------------------|
| 85.8  | 2780.4609 | 0.0005 | <a href="#">IHLISTQSAIPYALRVELEDWNGR</a> |

Mascot: <http://www.matrixscience.com/>

# Mascot Search Results

## Peptide View

MS/MS Fragmentation of **IHLISTQSAIPYALRVELEDWNGR**

Found in **P02679** in **uni\_human\_nr**, FIBG\_HUMAN Fibrinogen gamma chain OS=Homo sapiens GN=FGG PE=1 SV=3

Match to Query 16815: 2780.468848 from(1391.241700,2+) intensity(1615435.0000) rtinseconds(2906) scans(19968) index(16361)

Title: 130806\_HPL\_Human\_Plaque\_BR2\_TR2\_02\_Spectrum041194\_scans\_\_19968\_RTINSECONDS=2906

Data file E:\\RAW\\HumanPlaques\\mgf\\T\\1D\\T130806\_HPL\_Human\_Plaque\_BR2\_TR2\_02.mgf

Click mouse within plot area to zoom in by factor of two about that point

Or,  to  Da

Label all possible matches  Label matches used for scoring

Show Y-axis

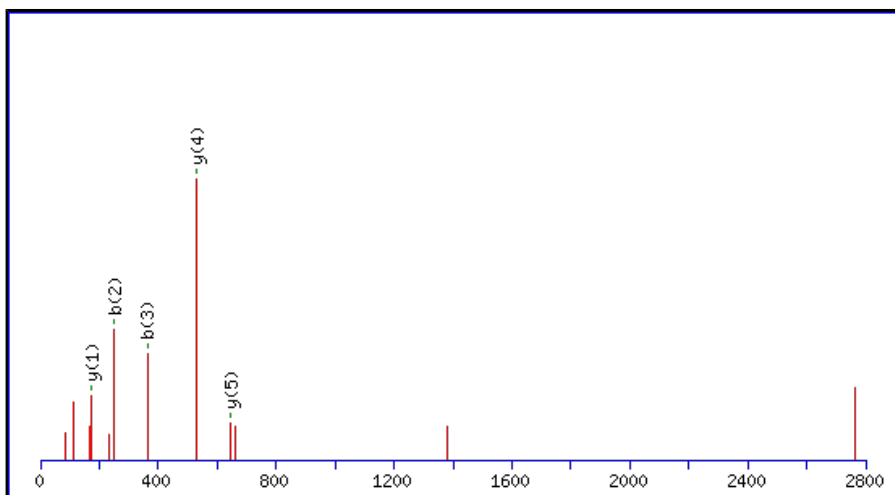

Monoisotopic mass of neutral peptide **Mr(calc): 2780.4609**

Fixed modifications: Carbamidomethyl (C) (apply to specified residues or termini only)

Ions Score: 23 Expect: 0.26

Matches : 5/248 fragment ions using 7 most intense peaks ([help](#))

| #  | b               | b <sup>++</sup> | b <sup>*</sup> | b <sup>*++</sup> | b <sup>0</sup> | b <sup>0++</sup> | Seq. | y         | y <sup>++</sup> | y <sup>*</sup> | y <sup>*++</sup> | y <sup>0</sup> | y <sup>0++</sup> | #  |
|----|-----------------|-----------------|----------------|------------------|----------------|------------------|------|-----------|-----------------|----------------|------------------|----------------|------------------|----|
| 1  | 114.0913        | 57.5493         |                |                  |                |                  | I    |           |                 |                |                  |                |                  | 24 |
| 2  | <b>251.1503</b> | 126.0788        |                |                  |                |                  | H    | 2668.3842 | 1334.6957       | 2651.3576      | 1326.1825        | 2650.3736      | 1325.6904        | 23 |
| 3  | <b>364.2343</b> | 182.6208        |                |                  |                |                  | L    | 2531.3253 | 1266.1663       | 2514.2987      | 1257.6530        | 2513.3147      | 1257.1610        | 22 |
| 4  | 477.3184        | 239.1628        |                |                  |                |                  | I    | 2418.2412 | 1209.6242       | 2401.2147      | 1201.1110        | 2400.2306      | 1200.6190        | 21 |
| 5  | 564.3504        | 282.6788        |                |                  | 546.3398       | 273.6736         | S    | 2305.1571 | 1153.0822       | 2288.1306      | 1144.5689        | 2287.1466      | 1144.0769        | 20 |
| 6  | 665.3981        | 333.2027        |                |                  | 647.3875       | 324.1974         | T    | 2218.1251 | 1109.5662       | 2201.0986      | 1101.0529        | 2200.1145      | 1100.5609        | 19 |
| 7  | 793.4567        | 397.2320        | 776.4301       | 388.7187         | 775.4461       | 388.2267         | Q    | 2117.0774 | 1059.0424       | 2100.0509      | 1050.5291        | 2099.0669      | 1050.0371        | 18 |
| 8  | 880.4887        | 440.7480        | 863.4621       | 432.2347         | 862.4781       | 431.7427         | S    | 1989.0189 | 995.0131        | 1971.9923      | 986.4998         | 1971.0083      | 986.0078         | 17 |
| 9  | 951.5258        | 476.2665        | 934.4993       | 467.7533         | 933.5152       | 467.2613         | A    | 1901.9868 | 951.4970        | 1884.9603      | 942.9838         | 1883.9763      | 942.4918         | 16 |
| 10 | 1064.6099       | 532.8086        | 1047.5833      | 524.2953         | 1046.5993      | 523.8033         | I    | 1830.9497 | 915.9785        | 1813.9232      | 907.4652         | 1812.9391      | 906.9732         | 15 |
| 11 | 1161.6626       | 581.3350        | 1144.6361      | 572.8217         | 1143.6521      | 572.3297         | P    | 1717.8656 | 859.4365        | 1700.8391      | 850.9232         | 1699.8551      | 850.4312         | 14 |
| 12 | 1324.7260       | 662.8666        | 1307.6994      | 654.3533         | 1306.7154      | 653.8613         | Y    | 1620.8129 | 810.9101        | 1603.7863      | 802.3968         | 1602.8023      | 801.9048         | 13 |
| 13 | 1395.7631       | 698.3852        | 1378.7365      | 689.8719         | 1377.7525      | 689.3799         | A    | 1457.7496 | 729.3784        | 1440.7230      | 720.8651         | 1439.7390      | 720.3731         | 12 |
| 14 | 1508.8471       | 754.9272        | 1491.8206      | 746.4139         | 1490.8366      | 745.9219         | L    | 1386.7124 | 693.8599        | 1369.6859      | 685.3466         | 1368.7019      | 684.8546         | 11 |
| 15 | 1664.9483       | 832.9778        | 1647.9217      | 824.4645         | 1646.9377      | 823.9725         | R    | 1273.6284 | 637.3178        | 1256.6018      | 628.8046         | 1255.6178      | 628.3125         | 10 |
| 16 | 1764.0167       | 882.5120        | 1746.9901      | 873.9987         | 1746.0061      | 873.5067         | V    | 1117.5273 | 559.2673        | 1100.5007      | 550.7540         | 1099.5167      | 550.2620         | 9  |
| 17 | 1893.0593       | 947.0333        | 1876.0327      | 938.5200         | 1875.0487      | 938.0280         | E    | 1018.4588 | 509.7331        | 1001.4323      | 501.2198         | 1000.4483      | 500.7278         | 8  |
| 18 | 2006.1433       | 1003.5753       | 1989.1168      | 995.0620         | 1988.1328      | 994.5700         | L    | 889.4163  | 445.2118        | 872.3897       | 436.6985         | 871.4057       | 436.2065         | 7  |
| 19 | 2135.1859       | 1068.0966       | 2118.1594      | 1059.5833        | 2117.1754      | 1059.0913        | E    | 776.3322  | 388.6697        | 759.3056       | 380.1565         | 758.3216       | 379.6645         | 6  |

|    |           |           |           |           |           |           |   |          |          |          |          |          |          |   |
|----|-----------|-----------|-----------|-----------|-----------|-----------|---|----------|----------|----------|----------|----------|----------|---|
| 20 | 2250.2129 | 1125.6101 | 2233.1863 | 1117.0968 | 2232.2023 | 1116.6048 | D | 647.2896 | 324.1484 | 630.2630 | 315.6352 | 629.2790 | 315.1432 | 5 |
| 21 | 2436.2922 | 1218.6497 | 2419.2656 | 1210.1364 | 2418.2816 | 1209.6444 | W | 532.2627 | 266.6350 | 515.2361 | 258.1217 |          |          | 4 |
| 22 | 2550.3351 | 1275.6712 | 2533.3086 | 1267.1579 | 2532.3245 | 1266.6659 | N | 346.1833 | 173.5953 | 329.1568 | 165.0820 |          |          | 3 |
| 23 | 2607.3566 | 1304.1819 | 2590.3300 | 1295.6686 | 2589.3460 | 1295.1766 | G | 232.1404 | 116.5738 | 215.1139 | 108.0606 |          |          | 2 |
| 24 |           |           |           |           |           |           | R | 175.1190 | 88.0631  | 158.0924 | 79.5498  |          |          | 1 |

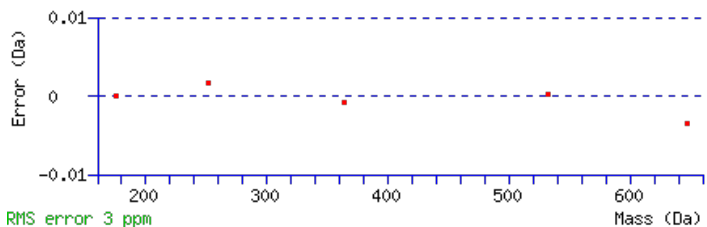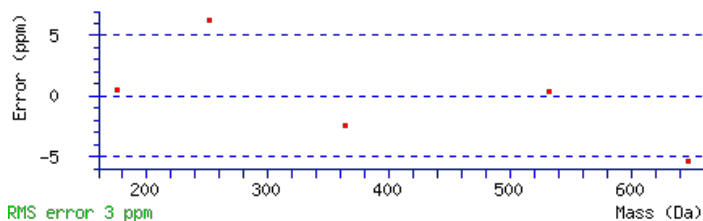

NCBI BLAST search of [IHLISTQSAIPYALRVELEDWNGR](#)  
 (Parameters: blastp, nr protein database, expect=20000, no filter, PAM30)  
 Other BLAST [web gateways](#)

All matches to this query

| Score | Mr(calc)  | Delta   | Sequence                                  |
|-------|-----------|---------|-------------------------------------------|
| 23.0  | 2780.4609 | 0.0079  | <a href="#">IHLISTQSAIPYALRVELEDWNGR</a>  |
| 6.3   | 2778.4525 | 2.0163  | <a href="#">HLLSGGTWTQAGQGQLRQVLSRDIR</a> |
| 6.3   | 2778.4525 | 2.0163  | <a href="#">HLLSGGTWTQAGQGQLRQVLSRDIR</a> |
| 6.3   | 2778.4525 | 2.0163  | <a href="#">HLLSGGTWTQAGQGQLRQVLSRDIR</a> |
| 5.3   | 2780.4685 | 0.0003  | <a href="#">SYLVFWTVSNLMAFLIMVVVYLR</a>   |
| 5.3   | 2780.4685 | 0.0003  | <a href="#">SYLVFWTVSNLMAFLIMVVVYLR</a>   |
| 4.4   | 2778.4511 | 2.0177  | <a href="#">TEQLVRLESNAVIENKTIAHNLQR</a>  |
| 4.4   | 2778.4511 | 2.0177  | <a href="#">TEQLVRLESNAVIENKTIAHNLQR</a>  |
| 3.7   | 2779.4585 | 1.0103  | <a href="#">VFVWDLDETHIEHSLLTGTEASR</a>   |
| 3.6   | 2780.4820 | -0.0132 | <a href="#">QALAVGNKIVLHTEQKQOLFAATNR</a> |

Mascot: <http://www.matrixscience.com/>

# Mascot Search Results

## Peptide View

MS/MS Fragmentation of **VELEDWNGR**

Found in **P02679** in **uni\_human\_nr**, FIBG\_HUMAN Fibrinogen gamma chain OS=Homo sapiens GN=FGG PE=1 SV=3

Match to Query 726: 1117.504128 from(559.759340,2+) intensity(19995396.0000) rtinseconds(1862) scans(9366) index(6465)

Title: 130801\_HPL\_Human\_Plaque\_BR1\_TR1\_16\_Spectrum026193\_scans\_\_9366\_RTINSECONDS=1862

Data file E:\\RAW\\HumanPlaques\\mgf\\T\\1D\\T130801\_HPL\_Human\_Plaque\_BR1\_TR1\_16.mgf

Click mouse within plot area to zoom in by factor of two about that point

Or, to Da

Label all possible matches Label matches used for scoring

Show Y-axis

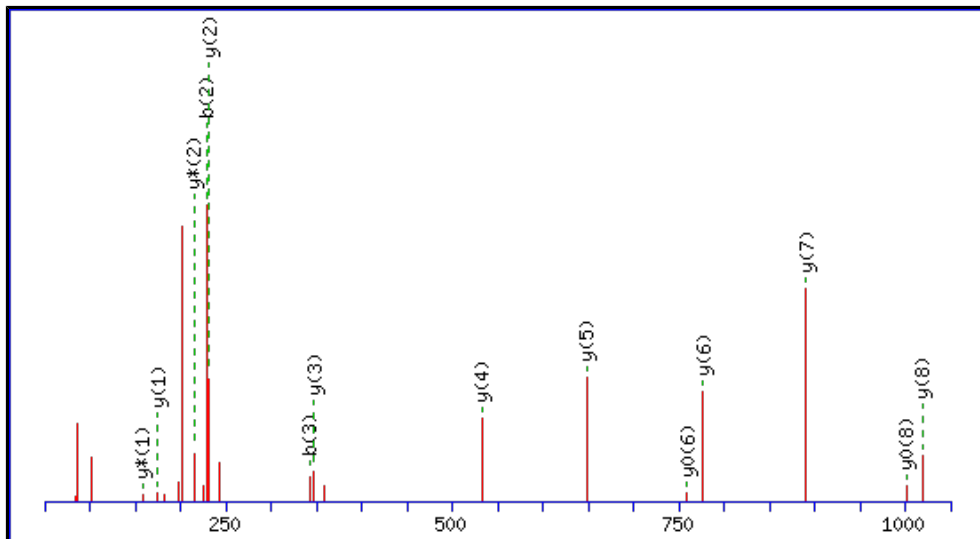

Monoisotopic mass of neutral peptide **Mr(calc):** 1117.5040

**Fixed modifications:** Carbamidomethyl (C) (apply to specified residues or termini only)

**Variable modifications:**

N7 : Deamidated (NQ)

**Ions Score:** 75 **Expect:** 8.1e-007

**Matches :** 14/74 fragment ions using 19 most intense peaks ([help](#))

| # | b               | b <sup>++</sup> | b*       | b <sup>+++</sup> | b <sup>0</sup> | b <sup>0++</sup> | Seq. | y                | y <sup>++</sup> | y*              | y <sup>+++</sup> | y <sup>0</sup>   | y <sup>0++</sup> | # |
|---|-----------------|-----------------|----------|------------------|----------------|------------------|------|------------------|-----------------|-----------------|------------------|------------------|------------------|---|
| 1 | 100.0757        | 50.5415         |          |                  |                |                  | V    |                  |                 |                 |                  |                  |                  | 9 |
| 2 | <b>229.1183</b> | 115.0628        |          |                  | 211.1077       | 106.0575         | E    | <b>1019.4429</b> | 510.2251        | 1002.4163       | 501.7118         | <b>1001.4323</b> | 501.2198         | 8 |
| 3 | <b>342.2023</b> | 171.6048        |          |                  | 324.1918       | 162.5995         | L    | <b>890.4003</b>  | 445.7038        | 873.3737        | 437.1905         | 872.3897         | 436.6985         | 7 |
| 4 | 471.2449        | 236.1261        |          |                  | 453.2344       | 227.1208         | E    | <b>777.3162</b>  | 389.1617        | 760.2897        | 380.6485         | <b>759.3056</b>  | 380.1565         | 6 |
| 5 | 586.2719        | 293.6396        |          |                  | 568.2613       | 284.6343         | D    | <b>648.2736</b>  | 324.6404        | 631.2471        | 316.1272         | 630.2631         | 315.6352         | 5 |
| 6 | 772.3512        | 386.6792        |          |                  | 754.3406       | 377.6740         | W    | <b>533.2467</b>  | 267.1270        | 516.2201        | 258.6137         |                  |                  | 4 |
| 7 | 887.3781        | 444.1927        | 870.3516 | 435.6794         | 869.3676       | 435.1874         | N    | <b>347.1674</b>  | 174.0873        | 330.1408        | 165.5740         |                  |                  | 3 |
| 8 | 944.3996        | 472.7034        | 927.3731 | 464.1902         | 926.3890       | 463.6982         | G    | <b>232.1404</b>  | 116.5738        | <b>215.1139</b> | 108.0606         |                  |                  | 2 |
| 9 |                 |                 |          |                  |                |                  | R    | <b>175.1190</b>  | 88.0631         | <b>158.0924</b> | 79.5498          |                  |                  | 1 |

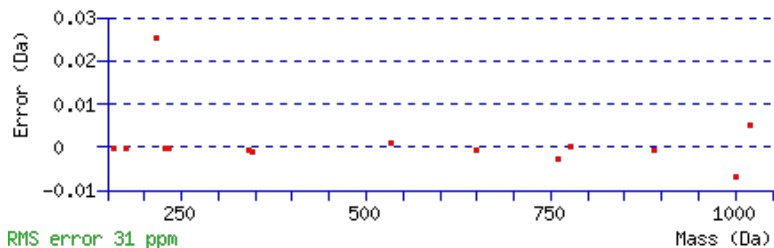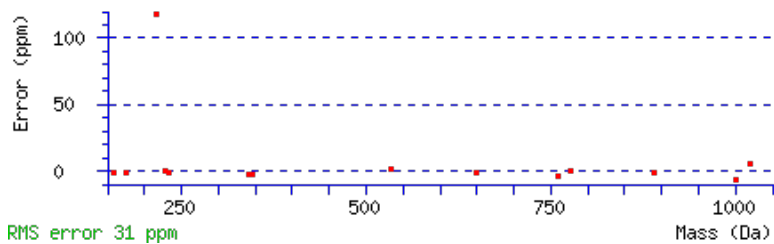

NCBI **BLAST** search of [VELEDWNGR](#)  
 (Parameters: blastp, nr protein database, expect=20000, no filter, PAM30)  
 Other BLAST [web gateways](#)

**All matches to this query**

| Score | Mr(calc)  | Delta   | Sequence                     |
|-------|-----------|---------|------------------------------|
| 74.7  | 1117.5040 | 0.0001  | <a href="#">VELEDWNGR</a>    |
| 9.9   | 1115.5029 | 2.0012  | <a href="#">NPQQNMNIR</a>    |
| 6.0   | 1115.4956 | 2.0086  | <a href="#">GPDSQRQDGR</a>   |
| 3.7   | 1117.5000 | 0.0041  | <a href="#">VGATDPNSGSGR</a> |
| 2.9   | 1115.5029 | 2.0012  | <a href="#">NPQQNMNIR</a>    |
| 2.9   | 1115.5029 | 2.0012  | <a href="#">NPQQNMNIR</a>    |
| 2.1   | 1115.4956 | 2.0086  | <a href="#">GPDSQRQDGR</a>   |
| 2.0   | 1117.5053 | -0.0012 | <a href="#">GRWANDGWR</a>    |
| 0.4   | 1116.5056 | 0.9985  | <a href="#">VIQGCCGNIP</a>   |

**Mascot:** <http://www.matrixscience.com/>

# Mascot Search Results

## Peptide View

MS/MS Fragmentation of **VELEDWNGR**

Found in **P02679** in **uni\_human\_nr**, FIBG\_HUMAN Fibrinogen gamma chain OS=Homo sapiens GN=FGG PE=1 SV=3

Match to Query 873: 1116.520108 from(559.267330,2+) intensity(25080110.0000) rtinseconds(1700) scans(8606) index(6060)

Title: 130801\_HPL\_Human\_Plaque\_BR2\_TR1\_09\_Spectrum026872\_scans\_\_8606\_RTINSECONDS=1700

Data file E:\\RAW\\HumanPlaques\\mgf\\T\\1D\\T130801\_HPL\_Human\_Plaque\_BR2\_TR1\_09.mgf

Click mouse within plot area to zoom in by factor of two about that point

Or, to Da

Label all possible matches Label matches used for scoring

Show Y-axis

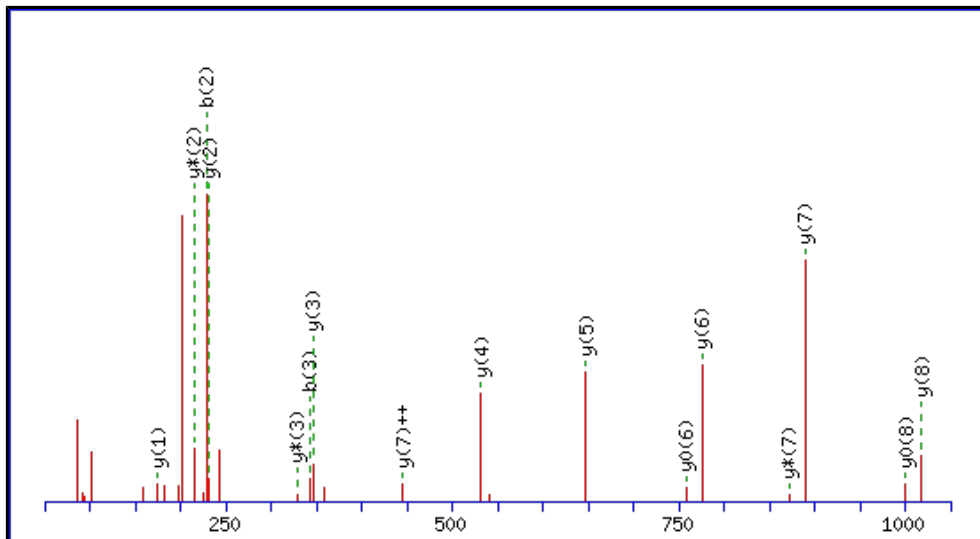

Monoisotopic mass of neutral peptide **Mr(calc):** 1116.5200

**Fixed modifications:** Carbamidomethyl (C) (apply to specified residues or termini only)

**Ions Score:** 68 **Expect:** 5e-006

**Matches :** 16/74 fragment ions using 24 most intense peaks ([help](#))

| # | b               | b <sup>++</sup> | b*       | b <sup>+++</sup> | b <sup>0</sup> | b <sup>0++</sup> | Seq. | y                | y <sup>++</sup> | y*              | y <sup>+++</sup> | y <sup>0</sup>   | y <sup>0++</sup> | # |
|---|-----------------|-----------------|----------|------------------|----------------|------------------|------|------------------|-----------------|-----------------|------------------|------------------|------------------|---|
| 1 | 100.0757        | 50.5415         |          |                  |                |                  | V    |                  |                 |                 |                  |                  |                  | 9 |
| 2 | <b>229.1183</b> | 115.0628        |          |                  | 211.1077       | 106.0575         | E    | <b>1018.4588</b> | 509.7331        | 1001.4323       | 501.2198         | <b>1000.4483</b> | 500.7278         | 8 |
| 3 | <b>342.2023</b> | 171.6048        |          |                  | 324.1918       | 162.5995         | L    | <b>889.4163</b>  | <b>445.2118</b> | <b>872.3897</b> | 436.6985         | 871.4057         | 436.2065         | 7 |
| 4 | 471.2449        | 236.1261        |          |                  | 453.2344       | 227.1208         | E    | <b>776.3322</b>  | 388.6697        | 759.3056        | 380.1565         | <b>758.3216</b>  | 379.6645         | 6 |
| 5 | 586.2719        | 293.6396        |          |                  | 568.2613       | 284.6343         | D    | <b>647.2896</b>  | 324.1484        | 630.2631        | 315.6352         | 629.2790         | 315.1432         | 5 |
| 6 | 772.3512        | 386.6792        |          |                  | 754.3406       | 377.6740         | W    | <b>532.2627</b>  | 266.6350        | 515.2361        | 258.1217         |                  |                  | 4 |
| 7 | 886.3941        | 443.7007        | 869.3676 | 435.1874         | 868.3836       | 434.6954         | N    | <b>346.1833</b>  | 173.5953        | <b>329.1568</b> | 165.0820         |                  |                  | 3 |
| 8 | 943.4156        | 472.2114        | 926.3890 | 463.6982         | 925.4050       | 463.2061         | G    | <b>232.1404</b>  | 116.5738        | <b>215.1139</b> | 108.0606         |                  |                  | 2 |
| 9 |                 |                 |          |                  |                |                  | R    | <b>175.1190</b>  | 88.0631         | 158.0924        | 79.5498          |                  |                  | 1 |

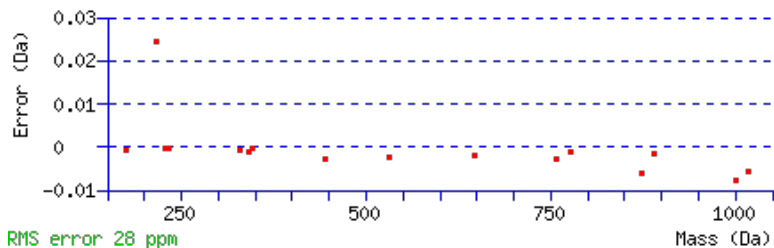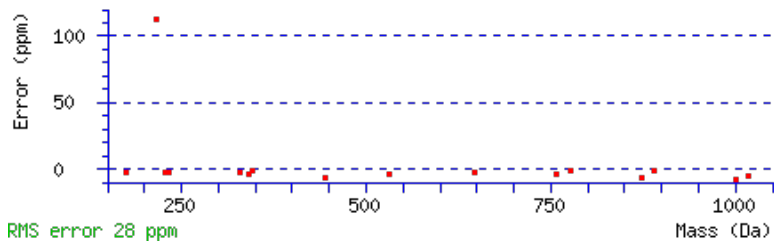

NCBI **BLAST** search of [VELEDWNGR](#)  
 (Parameters: blastp, nr protein database, expect=20000, no filter, PAM30)  
 Other BLAST [web gateways](#)

**All matches to this query**

| Score | Mr(calc)  | Delta  | Sequence                     |
|-------|-----------|--------|------------------------------|
| 67.6  | 1116.5200 | 0.0001 | <a href="#">VELEDWNGR</a>    |
| 13.2  | 1114.5116 | 2.0085 | <a href="#">RGTPGDADGGGR</a> |
| 12.5  | 1116.5161 | 0.0040 | <a href="#">MPSEYTYVK</a>    |
| 3.4   | 1115.5142 | 1.0059 | <a href="#">NHMSVSNVGR</a>   |
| 2.2   | 1116.5160 | 0.0041 | <a href="#">VGATDPNSGSGR</a> |
| 0.6   | 1116.5161 | 0.0040 | <a href="#">TEMQGEELK</a>    |
| 0.4   | 1115.5207 | 0.9994 | <a href="#">GNLEIGGDAGGR</a> |
| 0.3   | 1116.5199 | 0.0002 | <a href="#">AEEIEHYAR</a>    |

Mascot: <http://www.matrixscience.com/>

# Mascot Search Results

## Peptide View

MS/MS Fragmentation of **VELEDWNGRTSTADYAMFK**

Found in **P02679** in **uni\_human\_nr**, FIBG\_HUMAN Fibrinogen gamma chain OS=Homo sapiens GN=FGG PE=1 SV=3

Match to Query 9058: 2248.994712 from(750.672180,3+) intensity(880264.6875) rtinseconds(2393) scans(13381) index(10107)

Title: 130809\_HPL\_Human\_Plaque\_BR2\_TR3\_14\_Spectrum030776\_scans\_\_13381\_RTINSECONDS=2393

Data file E:\\RAW\\HumanPlaques\\imgf\\T\\1D\\T130809\_HPL\_Human\_Plaque\_BR2\_TR3\_14.mgf

Click mouse within plot area to zoom in by factor of two about that point

Or,  to  Da

Label all possible matches  Label matches used for scoring

Show Y-axis

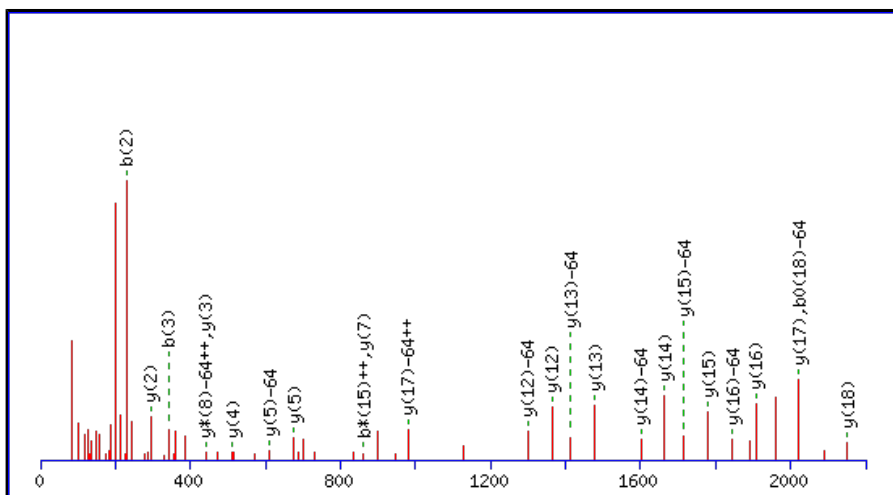

Monoisotopic mass of neutral peptide **Mr(calc):** 2248.9946

Fixed modifications: Carbamidomethyl (C) (apply to specified residues or termini only)

Variable modifications:

N7 : Deamidated (NQ)

M17 : Oxidation (M), with neutral losses 0.0000(shown in table), 63.9983

Ions Score: 85 Expect: 1.5e-007

Matches : 24/294 fragment ions using 33 most intense peaks ([help](#))

| #  | b               | b <sup>++</sup> | b <sup>*</sup> | b <sup>***</sup> | b <sup>0</sup> | b <sup>0++</sup> | Seq. | y                | y <sup>++</sup> | y <sup>*</sup> | y <sup>***</sup> | y <sup>0</sup> | y <sup>0++</sup> | #  |
|----|-----------------|-----------------|----------------|------------------|----------------|------------------|------|------------------|-----------------|----------------|------------------|----------------|------------------|----|
| 1  | 100.0757        | 50.5415         |                |                  |                |                  | V    |                  |                 |                |                  |                |                  | 19 |
| 2  | <b>229.1183</b> | 115.0628        |                |                  | 211.1077       | 106.0575         | E    | <b>2150.9335</b> | 1075.9704       | 2133.9070      | 1067.4571        | 2132.9230      | 1066.9651        | 18 |
| 3  | <b>342.2023</b> | 171.6048        |                |                  | 324.1918       | 162.5995         | L    | <b>2021.8909</b> | 1011.4491       | 2004.8644      | 1002.9358        | 2003.8804      | 1002.4438        | 17 |
| 4  | 471.2449        | 236.1261        |                |                  | 453.2344       | 227.1208         | E    | <b>1908.8069</b> | 954.9071        | 1891.7803      | 946.3938         | 1890.7963      | 945.9018         | 16 |
| 5  | 586.2719        | 293.6396        |                |                  | 568.2613       | 284.6343         | D    | <b>1779.7643</b> | 890.3858        | 1762.7377      | 881.8725         | 1761.7537      | 881.3805         | 15 |
| 6  | 772.3512        | 386.6792        |                |                  | 754.3406       | 377.6740         | W    | <b>1664.7373</b> | 832.8723        | 1647.7108      | 824.3590         | 1646.7268      | 823.8670         | 14 |
| 7  | 887.3781        | 444.1927        | 870.3516       | 435.6794         | 869.3676       | 435.1874         | N    | <b>1478.6580</b> | 739.8326        | 1461.6315      | 731.3194         | 1460.6475      | 730.8274         | 13 |
| 8  | 944.3996        | 472.7034        | 927.3731       | 464.1902         | 926.3890       | 463.6982         | G    | <b>1363.6311</b> | 682.3192        | 1346.6045      | 673.8059         | 1345.6205      | 673.3139         | 12 |
| 9  | 1100.5007       | 550.7540        | 1083.4742      | 542.2407         | 1082.4901      | 541.7487         | R    | 1306.6096        | 653.8084        | 1289.5831      | 645.2952         | 1288.5991      | 644.8032         | 11 |
| 10 | 1201.5484       | 601.2778        | 1184.5218      | 592.7646         | 1183.5378      | 592.2726         | T    | 1150.5085        | 575.7579        | 1133.4820      | 567.2446         | 1132.4979      | 566.7526         | 10 |
| 11 | 1288.5804       | 644.7938        | 1271.5539      | 636.2806         | 1270.5699      | 635.7886         | S    | 1049.4608        | 525.2341        | 1032.4343      | 516.7208         | 1031.4503      | 516.2288         | 9  |
| 12 | 1389.6281       | 695.3177        | 1372.6016      | 686.8044         | 1371.6175      | 686.3124         | T    | 962.4288         | 481.7180        | 945.4022       | 473.2048         | 944.4182       | 472.7128         | 8  |
| 13 | 1460.6652       | 730.8362        | 1443.6387      | 722.3230         | 1442.6546      | 721.8310         | A    | <b>861.3811</b>  | 431.1942        | 844.3546       | 422.6809         | 843.3706       | 422.1889         | 7  |
| 14 | 1575.6922       | 788.3497        | 1558.6656      | 779.8364         | 1557.6816      | 779.3444         | D    | 790.3440         | 395.6756        | 773.3175       | 387.1624         | 772.3334       | 386.6704         | 6  |
| 15 | 1738.7555       | 869.8814        | 1721.7289      | <b>861.3681</b>  | 1720.7449      | 860.8761         | Y    | <b>675.3171</b>  | 338.1622        | 658.2905       | 329.6489         |                |                  | 5  |
| 16 | 1809.7926       | 905.3999        | 1792.7661      | 896.8867         | 1791.7820      | 896.3947         | A    | <b>512.2537</b>  | 256.6305        | 495.2272       | 248.1172         |                |                  | 4  |
| 17 | 1956.8280       | 978.9176        | 1939.8015      | 970.4044         | 1938.8174      | 969.9124         | M    | <b>441.2166</b>  | 221.1119        | 424.1901       | 212.5987         |                |                  | 3  |



|    |           |           |           |           |           |           |   |                 |          |          |          |  |  |   |
|----|-----------|-----------|-----------|-----------|-----------|-----------|---|-----------------|----------|----------|----------|--|--|---|
| 18 | 2103.8964 | 1052.4518 | 2086.8699 | 1043.9386 | 2085.8858 | 1043.4466 | F | <b>294.1812</b> | 147.5942 | 277.1547 | 139.0810 |  |  | 2 |
| 19 |           |           |           |           |           |           | K | 147.1128        | 74.0600  | 130.0863 | 65.5468  |  |  | 1 |

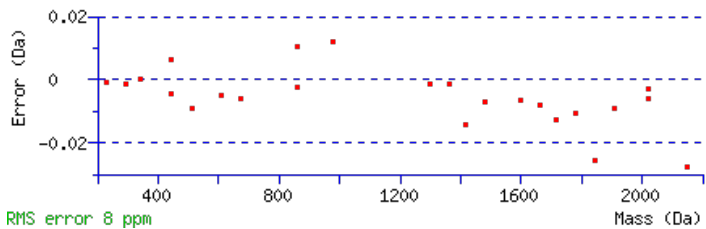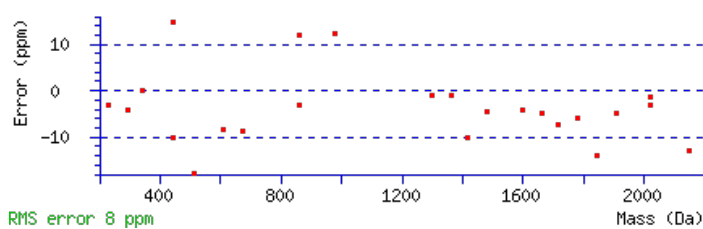

NCBI **BLAST** search of [VELEDWNGRTSTADYAMFK](#)  
 (Parameters: blastp, nr protein database, expect=20000, no filter, PAM30)  
 Other BLAST [web gateways](#)

**All matches to this query**

| Score | Mr(calc)  | Delta   | Sequence                             |
|-------|-----------|---------|--------------------------------------|
| 84.5  | 2248.9946 | 0.0001  | <a href="#">VELEDWNGRTSTADYAMFK</a>  |
| 2.3   | 2249.0052 | -0.0105 | <a href="#">GGARDLLEEACDQCASQLEK</a> |
| 0.3   | 2248.9915 | 0.0033  | <a href="#">RGKEMVDYMANYPEGIEGR</a>  |

**Mascot:** <http://www.matrixscience.com/>

# Mascot Search Results

## Peptide View

MS/MS Fragmentation of **VELEDWNGRTSTADYAMFK**

Found in **P02679** in **uni\_human\_nr**, FIBG\_HUMAN Fibrinogen gamma chain OS=Homo sapiens GN=FGG PE=1 SV=3

Match to Query 8780: 2232.998802 from(745.340210,3+) intensity(6672243.0000) rtinseconds(2636) scans(15159) index(11527)

Title: 130806\_HPL\_Human\_Plaque\_BR1\_TR2\_12\_Spectrum032646\_scans\_\_15159\_RTINSECONDS=2636

Data file E:\\RAW\\HumanPlaques\\imgf\\T\\1D\\T130806\_HPL\_Human\_Plaque\_BR1\_TR2\_12.mgf

Click mouse within plot area to zoom in by factor of two about that point

Or,  to  Da  
 Label all possible matches  Label matches used for scoring   
 Show Y-axis

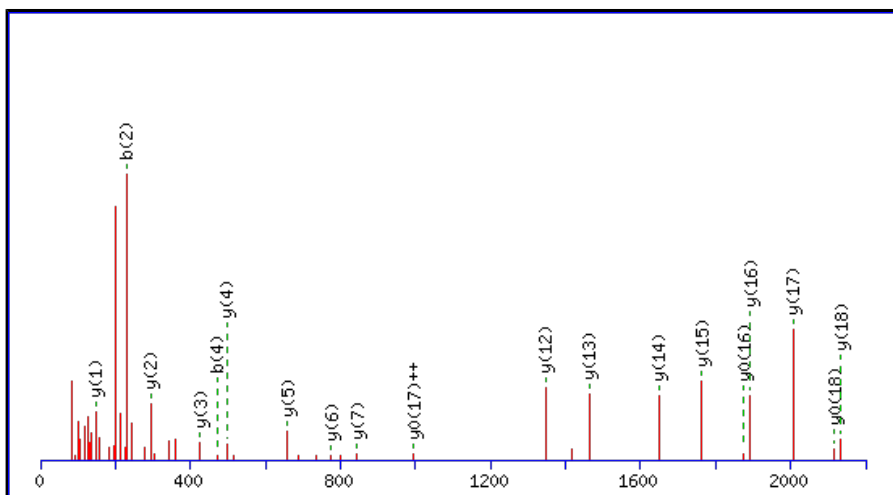

Monoisotopic mass of neutral peptide **Mr(calc)**: 2232.9997

Fixed modifications: Carbamidomethyl (C) (apply to specified residues or termini only)

Variable modifications:

N7 : Deamidated (NQ)

Ions Score: 122 Expect: 3e-011

Matches : 19/192 fragment ions using 27 most intense peaks ([help](#))

| #  | b               | b <sup>++</sup> | b <sup>*</sup> | b <sup>***</sup> | b <sup>0</sup> | b <sup>0++</sup> | Seq. | y                | y <sup>++</sup> | y <sup>*</sup> | y <sup>***</sup> | y <sup>0</sup>   | y <sup>0++</sup> | #  |
|----|-----------------|-----------------|----------------|------------------|----------------|------------------|------|------------------|-----------------|----------------|------------------|------------------|------------------|----|
| 1  | 100.0757        | 50.5415         |                |                  |                |                  | V    |                  |                 |                |                  |                  |                  | 19 |
| 2  | <b>229.1183</b> | 115.0628        |                |                  | 211.1077       | 106.0575         | E    | <b>2134.9386</b> | 1067.9729       | 2117.9121      | 1059.4597        | <b>2116.9280</b> | 1058.9677        | 18 |
| 3  | 342.2023        | 171.6048        |                |                  | 324.1918       | 162.5995         | L    | <b>2005.8960</b> | 1003.4516       | 1988.8695      | 994.9384         | 1987.8855        | <b>994.4464</b>  | 17 |
| 4  | <b>471.2449</b> | 236.1261        |                |                  | 453.2344       | 227.1208         | E    | <b>1892.8120</b> | 946.9096        | 1875.7854      | 938.3963         | <b>1874.8014</b> | 937.9043         | 16 |
| 5  | 586.2719        | 293.6396        |                |                  | 568.2613       | 284.6343         | D    | <b>1763.7694</b> | 882.3883        | 1746.7428      | 873.8750         | 1745.7588        | 873.3830         | 15 |
| 6  | 772.3512        | 386.6792        |                |                  | 754.3406       | 377.6740         | W    | <b>1648.7424</b> | 824.8748        | 1631.7159      | 816.3616         | 1630.7319        | 815.8696         | 14 |
| 7  | 887.3781        | 444.1927        | 870.3516       | 435.6794         | 869.3676       | 435.1874         | N    | <b>1462.6631</b> | 731.8352        | 1445.6366      | 723.3219         | 1444.6525        | 722.8299         | 13 |
| 8  | 944.3996        | 472.7034        | 927.3731       | 464.1902         | 926.3890       | 463.6982         | G    | <b>1347.6362</b> | 674.3217        | 1330.6096      | 665.8084         | 1329.6256        | 665.3164         | 12 |
| 9  | 1100.5007       | 550.7540        | 1083.4742      | 542.2407         | 1082.4901      | 541.7487         | R    | 1290.6147        | 645.8110        | 1273.5882      | 637.2977         | 1272.6041        | 636.8057         | 11 |
| 10 | 1201.5484       | 601.2778        | 1184.5218      | 592.7646         | 1183.5378      | 592.2726         | T    | 1134.5136        | 567.7604        | 1117.4870      | 559.2472         | 1116.5030        | 558.7552         | 10 |
| 11 | 1288.5804       | 644.7938        | 1271.5539      | 636.2806         | 1270.5699      | 635.7886         | S    | 1033.4659        | 517.2366        | 1016.4394      | 508.7233         | 1015.4553        | 508.2313         | 9  |
| 12 | 1389.6281       | 695.3177        | 1372.6016      | 686.8044         | 1371.6175      | 686.3124         | T    | 946.4339         | 473.7206        | 929.4073       | 465.2073         | 928.4233         | 464.7153         | 8  |
| 13 | 1460.6652       | 730.8362        | 1443.6387      | 722.3230         | 1442.6546      | 721.8310         | A    | <b>845.3862</b>  | 423.1967        | 828.3597       | 414.6835         | 827.3756         | 414.1915         | 7  |
| 14 | 1575.6922       | 788.3497        | 1558.6656      | 779.8364         | 1557.6816      | 779.3444         | D    | <b>774.3491</b>  | 387.6782        | 757.3225       | 379.1649         | 756.3385         | 378.6729         | 6  |
| 15 | 1738.7555       | 869.8814        | 1721.7289      | 861.3681         | 1720.7449      | 860.8761         | Y    | <b>659.3221</b>  | 330.1647        | 642.2956       | 321.6514         |                  |                  | 5  |
| 16 | 1809.7926       | 905.3999        | 1792.7661      | 896.8867         | 1791.7820      | 896.3947         | A    | <b>496.2588</b>  | 248.6330        | 479.2323       | 240.1198         |                  |                  | 4  |
| 17 | 1940.8331       | 970.9202        | 1923.8065      | 962.4069         | 1922.8225      | 961.9149         | M    | <b>425.2217</b>  | 213.1145        | 408.1952       | 204.6012         |                  |                  | 3  |
| 18 | 2087.9015       | 1044.4544       | 2070.8749      | 1035.9411        | 2069.8909      | 1035.4491        | F    | <b>294.1812</b>  | 147.5942        | 277.1547       | 139.0810         |                  |                  | 2  |

|    |  |  |  |  |  |  |   |          |         |          |         |  |  |  |   |
|----|--|--|--|--|--|--|---|----------|---------|----------|---------|--|--|--|---|
| 19 |  |  |  |  |  |  | K | 147.1128 | 74.0600 | 130.0863 | 65.5468 |  |  |  | 1 |
|----|--|--|--|--|--|--|---|----------|---------|----------|---------|--|--|--|---|

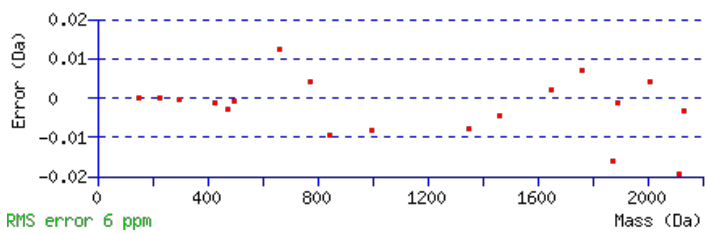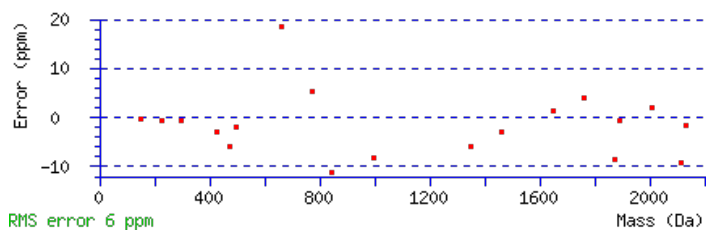

NCBI BLAST search of [VELEDWNGRTSTADYAMEK](#)  
 (Parameters: blastp, nr protein database, expect=20000, no filter, PAM30)  
 Other BLAST [web gateways](#)

All matches to this query

| Score | Mr(calc)  | Delta   | Sequence                             |
|-------|-----------|---------|--------------------------------------|
| 121.7 | 2232.9997 | -0.0009 | <a href="#">VELEDWNGRTSTADYAMEK</a>  |
| 0.7   | 2232.9957 | 0.0031  | <a href="#">VEDENALSIFETNCHSGSPK</a> |

Mascot: <http://www.matrixscience.com/>

# Mascot Search Results

## Peptide View

MS/MS Fragmentation of **VELEDWNGRTSTADYAMFK**

Found in **P02679** in **uni\_human\_nr**, FIBG\_HUMAN Fibrinogen gamma chain OS=Homo sapiens GN=FGG PE=1 SV=3

Match to Query 8781: 2233.004008 from(1117.509280,2+) intensity(304648.5938) rtinseconds(2638) scans(15170) index(11537)

Title: 130806\_HPL\_Human\_Plaque\_BR1\_TR2\_12\_Spectrum032656\_scans\_\_15170\_RTINSECONDS=2638

Data file E:\\RAW\\HumanPlaques\\mgf\\T\\1D\\T130806\_HPL\_Human\_Plaque\_BR1\_TR2\_12.mgf

Click mouse within plot area to zoom in by factor of two about that point

Or, to Da

Label all possible matches Label matches used for scoring

Show Y-axis

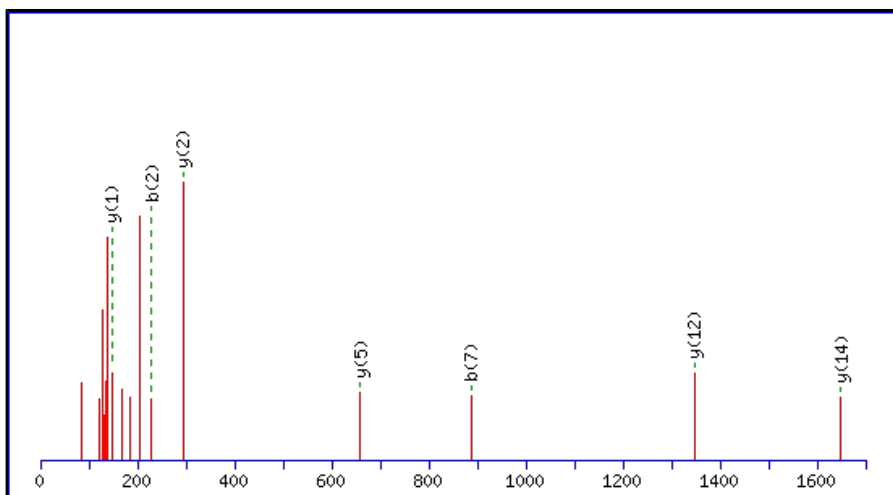

Monoisotopic mass of neutral peptide Mr(calc): 2232.9997

Fixed modifications: Carbamidomethyl (C) (apply to specified residues or termini only)

Variable modifications:

N7 : Deamidated (NQ)

Ions Score: 28 Expect: 0.083

Matches : 7/192 fragment ions using 11 most intense peaks ([help](#))

| #  | b               | b <sup>++</sup> | b*        | b <sup>+++</sup> | b <sup>0</sup> | b <sup>0++</sup> | Seq. | y                | y <sup>++</sup> | y*        | y <sup>+++</sup> | y <sup>0</sup> | y <sup>0++</sup> | #  |
|----|-----------------|-----------------|-----------|------------------|----------------|------------------|------|------------------|-----------------|-----------|------------------|----------------|------------------|----|
| 1  | 100.0757        | 50.5415         |           |                  |                |                  | V    |                  |                 |           |                  |                |                  | 19 |
| 2  | <b>229.1183</b> | 115.0628        |           |                  | 211.1077       | 106.0575         | E    | 2134.9386        | 1067.9729       | 2117.9121 | 1059.4597        | 2116.9280      | 1058.9677        | 18 |
| 3  | 342.2023        | 171.6048        |           |                  | 324.1918       | 162.5995         | L    | 2005.8960        | 1003.4516       | 1988.8695 | 994.9384         | 1987.8855      | 994.4464         | 17 |
| 4  | 471.2449        | 236.1261        |           |                  | 453.2344       | 227.1208         | E    | 1892.8120        | 946.9096        | 1875.7854 | 938.3963         | 1874.8014      | 937.9043         | 16 |
| 5  | 586.2719        | 293.6396        |           |                  | 568.2613       | 284.6343         | D    | 1763.7694        | 882.3883        | 1746.7428 | 873.8750         | 1745.7588      | 873.3830         | 15 |
| 6  | 772.3512        | 386.6792        |           |                  | 754.3406       | 377.6740         | W    | <b>1648.7424</b> | 824.8748        | 1631.7159 | 816.3616         | 1630.7319      | 815.8696         | 14 |
| 7  | <b>887.3781</b> | 444.1927        | 870.3516  | 435.6794         | 869.3676       | 435.1874         | N    | 1462.6631        | 731.8352        | 1445.6366 | 723.3219         | 1444.6525      | 722.8299         | 13 |
| 8  | 944.3996        | 472.7034        | 927.3731  | 464.1902         | 926.3890       | 463.6982         | G    | <b>1347.6362</b> | 674.3217        | 1330.6096 | 665.8084         | 1329.6256      | 665.3164         | 12 |
| 9  | 1100.5007       | 550.7540        | 1083.4742 | 542.2407         | 1082.4901      | 541.7487         | R    | 1290.6147        | 645.8110        | 1273.5882 | 637.2977         | 1272.6041      | 636.8057         | 11 |
| 10 | 1201.5484       | 601.2778        | 1184.5218 | 592.7646         | 1183.5378      | 592.2726         | T    | 1134.5136        | 567.7604        | 1117.4870 | 559.2472         | 1116.5030      | 558.7552         | 10 |
| 11 | 1288.5804       | 644.7938        | 1271.5539 | 636.2806         | 1270.5699      | 635.7886         | S    | 1033.4659        | 517.2366        | 1016.4394 | 508.7233         | 1015.4553      | 508.2313         | 9  |
| 12 | 1389.6281       | 695.3177        | 1372.6016 | 686.8044         | 1371.6175      | 686.3124         | T    | 946.4339         | 473.7206        | 929.4073  | 465.2073         | 928.4233       | 464.7153         | 8  |
| 13 | 1460.6652       | 730.8362        | 1443.6387 | 722.3230         | 1442.6546      | 721.8310         | A    | 845.3862         | 423.1967        | 828.3597  | 414.6835         | 827.3756       | 414.1915         | 7  |
| 14 | 1575.6922       | 788.3497        | 1558.6656 | 779.8364         | 1557.6816      | 779.3444         | D    | 774.3491         | 387.6782        | 757.3225  | 379.1649         | 756.3385       | 378.6729         | 6  |
| 15 | 1738.7555       | 869.8814        | 1721.7289 | 861.3681         | 1720.7449      | 860.8761         | Y    | <b>659.3221</b>  | 330.1647        | 642.2956  | 321.6514         |                |                  | 5  |
| 16 | 1809.7926       | 905.3999        | 1792.7661 | 896.8867         | 1791.7820      | 896.3947         | A    | 496.2588         | 248.6330        | 479.2323  | 240.1198         |                |                  | 4  |
| 17 | 1940.8331       | 970.9202        | 1923.8065 | 962.4069         | 1922.8225      | 961.9149         | M    | 425.2217         | 213.1145        | 408.1952  | 204.6012         |                |                  | 3  |
| 18 | 2087.9015       | 1044.4544       | 2070.8749 | 1035.9411        | 2069.8909      | 1035.4491        | F    | <b>294.1812</b>  | 147.5942        | 277.1547  | 139.0810         |                |                  | 2  |

|    |  |  |  |  |  |  |          |                 |         |          |         |  |  |          |
|----|--|--|--|--|--|--|----------|-----------------|---------|----------|---------|--|--|----------|
| 19 |  |  |  |  |  |  | <b>K</b> | <b>147.1128</b> | 74.0600 | 130.0863 | 65.5468 |  |  | <b>1</b> |
|----|--|--|--|--|--|--|----------|-----------------|---------|----------|---------|--|--|----------|

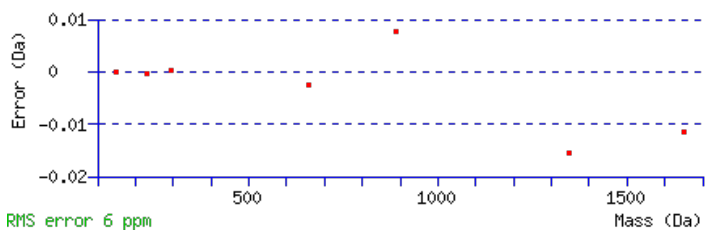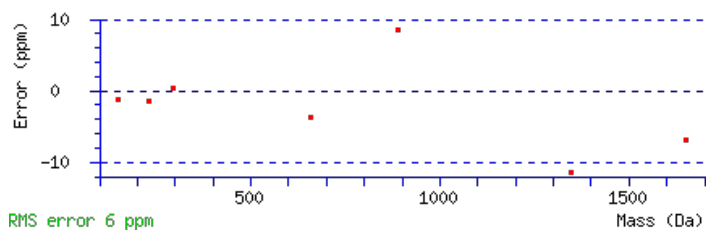

NCBI **BLAST** search of [VELEDWNGRTSTADYAMEK](#)  
 (Parameters: blastp, nr protein database, expect=20000, no filter, PAM30)  
 Other BLAST [web gateways](#)

**All matches to this query**

| Score | Mr(calc)  | Delta   | Sequence                            |
|-------|-----------|---------|-------------------------------------|
| 27.5  | 2232.9997 | 0.0043  | <a href="#">VELEDWNGRTSTADYAMEK</a> |
| 1.6   | 2233.0051 | -0.0011 | <a href="#">HRRihtGEKPHMCDDCGK</a>  |

Mascot: <http://www.matrixscience.com/>

# Mascot Search Results

## Peptide View

MS/MS Fragmentation of **VELEDWNGRTSTADYAMFK**

Found in **P02679** in **uni\_human\_nr**, FIBG\_HUMAN Fibrinogen gamma chain OS=Homo sapiens GN=FGG PE=1 SV=3

Match to Query 10578: 2232.015702 from(745.012510,3+) intensity(3327254.5000) rtinseconds(2450) scans(14803) index(11624)

Title: 130809\_HPL\_Human\_Plaque\_BR1\_TR3\_05\_Spectrum034189\_scans\_14803\_RTINSECONDS=2450

Data file E:\\RAW\\HumanPlaques\\imgf\\T\\1D\\T130809\_HPL\_Human\_Plaque\_BR1\_TR3\_05.mgf

Click mouse within plot area to zoom in by factor of two about that point

Or, to Da

Label all possible matches Label matches used for scoring

Show Y-axis

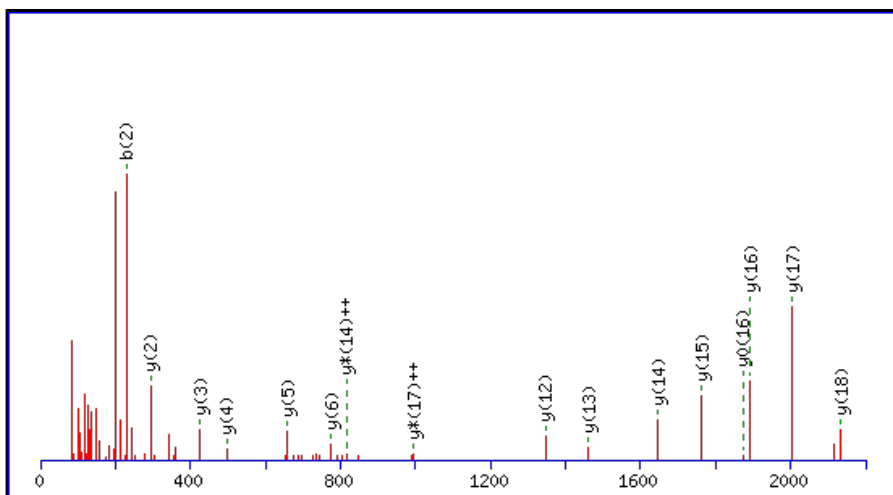

Monoisotopic mass of neutral peptide Mr(calc): 2232.0157

Fixed modifications: Carbamidomethyl (C) (apply to specified residues or termini only)

Ions Score: 120 Expect: 6.4e-011

Matches : 16/192 fragment ions using 17 most intense peaks ([help](#))

| #  | b               | b <sup>++</sup> | b*        | b <sup>***</sup> | b <sup>0</sup> | b <sup>0++</sup> | Seq. | y                | y <sup>++</sup> | y*        | y <sup>***</sup> | y <sup>0</sup>   | y <sup>0++</sup> | #  |
|----|-----------------|-----------------|-----------|------------------|----------------|------------------|------|------------------|-----------------|-----------|------------------|------------------|------------------|----|
| 1  | 100.0757        | 50.5415         |           |                  |                |                  | V    |                  |                 |           |                  |                  |                  | 19 |
| 2  | <b>229.1183</b> | 115.0628        |           |                  | 211.1077       | 106.0575         | E    | <b>2133.9546</b> | 1067.4809       | 2116.9280 | 1058.9677        | 2115.9440        | 1058.4757        | 18 |
| 3  | 342.2023        | 171.6048        |           |                  | 324.1918       | 162.5995         | L    | <b>2004.9120</b> | 1002.9596       | 1987.8855 | <b>994.4464</b>  | 1986.9014        | 993.9544         | 17 |
| 4  | 471.2449        | 236.1261        |           |                  | 453.2344       | 227.1208         | E    | <b>1891.8279</b> | 946.4176        | 1874.8014 | 937.9043         | <b>1873.8174</b> | 937.4123         | 16 |
| 5  | 586.2719        | 293.6396        |           |                  | 568.2613       | 284.6343         | D    | <b>1762.7853</b> | 881.8963        | 1745.7588 | 873.3830         | 1744.7748        | 872.8910         | 15 |
| 6  | 772.3512        | 386.6792        |           |                  | 754.3406       | 377.6740         | W    | <b>1647.7584</b> | 824.3828        | 1630.7319 | <b>815.8696</b>  | 1629.7478        | 815.3776         | 14 |
| 7  | 886.3941        | 443.7007        | 869.3676  | 435.1874         | 868.3836       | 434.6954         | N    | <b>1461.6791</b> | 731.3432        | 1444.6525 | 722.8299         | 1443.6685        | 722.3379         | 13 |
| 8  | 943.4156        | 472.2114        | 926.3890  | 463.6982         | 925.4050       | 463.2061         | G    | <b>1347.6362</b> | 674.3217        | 1330.6096 | 665.8084         | 1329.6256        | 665.3164         | 12 |
| 9  | 1099.5167       | 550.2620        | 1082.4901 | 541.7487         | 1081.5061      | 541.2567         | R    | 1290.6147        | 645.8110        | 1273.5882 | 637.2977         | 1272.6041        | 636.8057         | 11 |
| 10 | 1200.5644       | 600.7858        | 1183.5378 | 592.2726         | 1182.5538      | 591.7805         | T    | 1134.5136        | 567.7604        | 1117.4870 | 559.2472         | 1116.5030        | 558.7552         | 10 |
| 11 | 1287.5964       | 644.3018        | 1270.5699 | 635.7886         | 1269.5858      | 635.2966         | S    | 1033.4659        | 517.2366        | 1016.4394 | 508.7233         | 1015.4553        | 508.2313         | 9  |
| 12 | 1388.6441       | 694.8257        | 1371.6175 | 686.3124         | 1370.6335      | 685.8204         | T    | 946.4339         | 473.7206        | 929.4073  | 465.2073         | 928.4233         | 464.7153         | 8  |
| 13 | 1459.6812       | 730.3442        | 1442.6546 | 721.8310         | 1441.6706      | 721.3390         | A    | 845.3862         | 423.1967        | 828.3597  | 414.6835         | 827.3756         | 414.1915         | 7  |
| 14 | 1574.7081       | 787.8577        | 1557.6816 | 779.3444         | 1556.6976      | 778.8524         | D    | <b>774.3491</b>  | 387.6782        | 757.3225  | 379.1649         | 756.3385         | 378.6729         | 6  |
| 15 | 1737.7715       | 869.3894        | 1720.7449 | 860.8761         | 1719.7609      | 860.3841         | Y    | <b>659.3221</b>  | 330.1647        | 642.2956  | 321.6514         |                  |                  | 5  |
| 16 | 1808.8086       | 904.9079        | 1791.7820 | 896.3947         | 1790.7980      | 895.9026         | A    | <b>496.2588</b>  | 248.6330        | 479.2323  | 240.1198         |                  |                  | 4  |
| 17 | 1939.8491       | 970.4282        | 1922.8225 | 961.9149         | 1921.8385      | 961.4229         | M    | <b>425.2217</b>  | 213.1145        | 408.1952  | 204.6012         |                  |                  | 3  |
| 18 | 2086.9175       | 1043.9624       | 2069.8909 | 1035.4491        | 2068.9069      | 1034.9571        | F    | <b>294.1812</b>  | 147.5942        | 277.1547  | 139.0810         |                  |                  | 2  |
| 19 |                 |                 |           |                  |                |                  | K    | 147.1128         | 74.0600         | 130.0863  | 65.5468          |                  |                  | 1  |

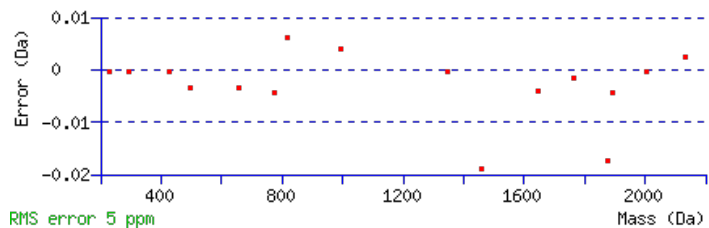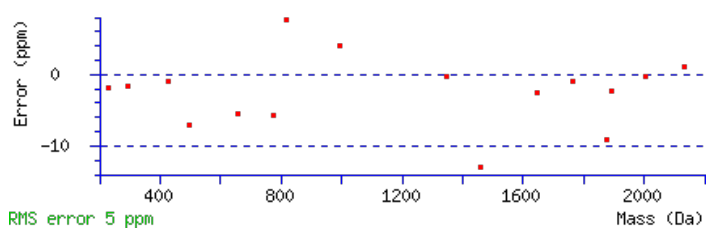

NCBI **BLAST** search of [VELEDWNGRTSTADYAMEK](#)

(Parameters: blastp, nr protein database, expect=20000, no filter, PAM30)

Other BLAST [web gateways](#)

**All matches to this query**

| Score | Mr(calc)  | Delta   | Sequence                            |
|-------|-----------|---------|-------------------------------------|
| 119.5 | 2232.0157 | -0.0000 | <a href="#">VELEDWNGRTSTADYAMEK</a> |

Mascot: <http://www.matrixscience.com/>

# Mascot Search Results

## Peptide View

MS/MS Fragmentation of **VELEDWNGRTSTADYAMFK**

Found in **P02679** in **uni\_human\_nr**, FIBG\_HUMAN Fibrinogen gamma chain OS=Homo sapiens GN=FGG PE=1 SV=3

Match to Query 10924: 2232.015468 from(1117.015010,2+) intensity(658890.8125) rtinseconds(2437) scans(14905) index(11856)

Title: 130809\_HPL\_Human\_Plaque\_BR2\_TR3\_05\_Spectrum034512\_scans\_14905\_RTINSECONDS=2437

Data file E:\\RAW\\HumanPlaques\\mgf\\T\\1D\\T130809\_HPL\_Human\_Plaque\_BR2\_TR3\_05.mgf

Click mouse within plot area to zoom in by factor of two about that point

Or,  to  Da

Label all possible matches  Label matches used for scoring

Show Y-axis

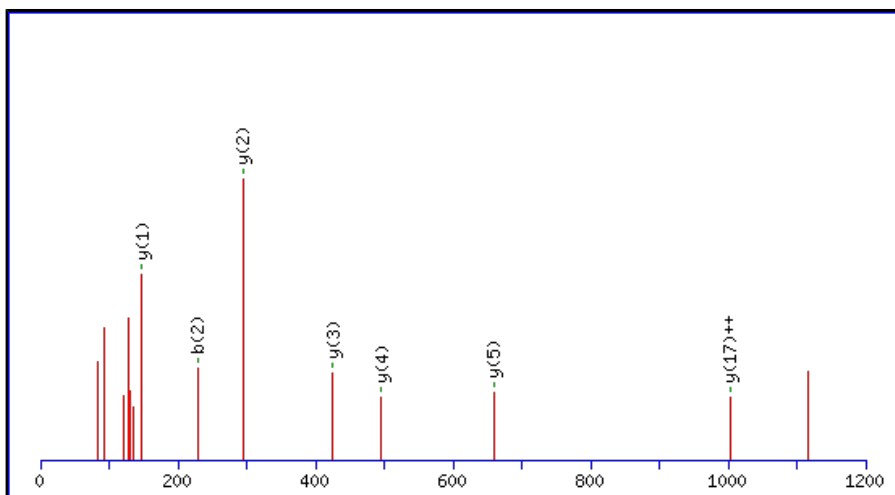

Monoisotopic mass of neutral peptide **Mr(calc):** 2232.0157

Fixed modifications: Carbamidomethyl (C) (apply to specified residues or termini only)

Ions Score: 38 Expect: 0.0091

Matches : 7/192 fragment ions using 8 most intense peaks ([help](#))

| #  | b               | b <sup>++</sup> | b*        | b <sup>*++</sup> | b <sup>0</sup> | b <sup>0++</sup> | Seq. | y               | y <sup>++</sup>  | y*        | y <sup>*++</sup> | y <sup>0</sup> | y <sup>0++</sup> | #  |
|----|-----------------|-----------------|-----------|------------------|----------------|------------------|------|-----------------|------------------|-----------|------------------|----------------|------------------|----|
| 1  | 100.0757        | 50.5415         |           |                  |                |                  | V    |                 |                  |           |                  |                |                  | 19 |
| 2  | <b>229.1183</b> | 115.0628        |           |                  | 211.1077       | 106.0575         | E    | 2133.9546       | 1067.4809        | 2116.9280 | 1058.9677        | 2115.9440      | 1058.4757        | 18 |
| 3  | 342.2023        | 171.6048        |           |                  | 324.1918       | 162.5995         | L    | 2004.9120       | <b>1002.9596</b> | 1987.8855 | 994.4464         | 1986.9014      | 993.9544         | 17 |
| 4  | 471.2449        | 236.1261        |           |                  | 453.2344       | 227.1208         | E    | 1891.8279       | 946.4176         | 1874.8014 | 937.9043         | 1873.8174      | 937.4123         | 16 |
| 5  | 586.2719        | 293.6396        |           |                  | 568.2613       | 284.6343         | D    | 1762.7853       | 881.8963         | 1745.7588 | 873.3830         | 1744.7748      | 872.8910         | 15 |
| 6  | 772.3512        | 386.6792        |           |                  | 754.3406       | 377.6740         | W    | 1647.7584       | 824.3828         | 1630.7319 | 815.8696         | 1629.7478      | 815.3776         | 14 |
| 7  | 886.3941        | 443.7007        | 869.3676  | 435.1874         | 868.3836       | 434.6954         | N    | 1461.6791       | 731.3432         | 1444.6525 | 722.8299         | 1443.6685      | 722.3379         | 13 |
| 8  | 943.4156        | 472.2114        | 926.3890  | 463.6982         | 925.4050       | 463.2061         | G    | 1347.6362       | 674.3217         | 1330.6096 | 665.8084         | 1329.6256      | 665.3164         | 12 |
| 9  | 1099.5167       | 550.2620        | 1082.4901 | 541.7487         | 1081.5061      | 541.2567         | R    | 1290.6147       | 645.8110         | 1273.5882 | 637.2977         | 1272.6041      | 636.8057         | 11 |
| 10 | 1200.5644       | 600.7858        | 1183.5378 | 592.2726         | 1182.5538      | 591.7805         | T    | 1134.5136       | 567.7604         | 1117.4870 | 559.2472         | 1116.5030      | 558.7552         | 10 |
| 11 | 1287.5964       | 644.3018        | 1270.5699 | 635.7886         | 1269.5858      | 635.2966         | S    | 1033.4659       | 517.2366         | 1016.4394 | 508.7233         | 1015.4553      | 508.2313         | 9  |
| 12 | 1388.6441       | 694.8257        | 1371.6175 | 686.3124         | 1370.6335      | 685.8204         | T    | 946.4339        | 473.7206         | 929.4073  | 465.2073         | 928.4233       | 464.7153         | 8  |
| 13 | 1459.6812       | 730.3442        | 1442.6546 | 721.8310         | 1441.6706      | 721.3390         | A    | 845.3862        | 423.1967         | 828.3597  | 414.6835         | 827.3756       | 414.1915         | 7  |
| 14 | 1574.7081       | 787.8577        | 1557.6816 | 779.3444         | 1556.6976      | 778.8524         | D    | 774.3491        | 387.6782         | 757.3225  | 379.1649         | 756.3385       | 378.6729         | 6  |
| 15 | 1737.7715       | 869.3894        | 1720.7449 | 860.8761         | 1719.7609      | 860.3841         | Y    | <b>659.3221</b> | 330.1647         | 642.2956  | 321.6514         |                |                  | 5  |
| 16 | 1808.8086       | 904.9079        | 1791.7820 | 896.3947         | 1790.7980      | 895.9026         | A    | <b>496.2588</b> | 248.6330         | 479.2323  | 240.1198         |                |                  | 4  |
| 17 | 1939.8491       | 970.4282        | 1922.8225 | 961.9149         | 1921.8385      | 961.4229         | M    | <b>425.2217</b> | 213.1145         | 408.1952  | 204.6012         |                |                  | 3  |
| 18 | 2086.9175       | 1043.9624       | 2069.8909 | 1035.4491        | 2068.9069      | 1034.9571        | F    | <b>294.1812</b> | 147.5942         | 277.1547  | 139.0810         |                |                  | 2  |
| 19 |                 |                 |           |                  |                |                  | K    | <b>147.1128</b> | 74.0600          | 130.0863  | 65.5468          |                |                  | 1  |



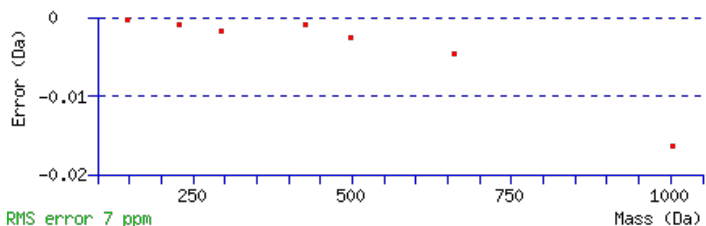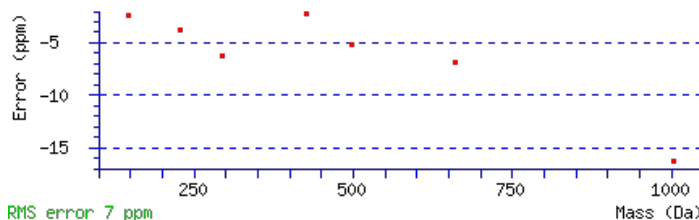

NCBI **BLAST** search of [VELEDWNGRTSTADYAMFK](#)  
 (Parameters: blastp, nr protein database, expect=20000, no filter, PAM30)  
 Other BLAST [web gateways](#)

**All matches to this query**

| Score | Mr(calc)  | Delta   | Sequence                              |
|-------|-----------|---------|---------------------------------------|
| 37.8  | 2232.0157 | -0.0002 | <a href="#">VELEDWNGRTSTADYAMFK</a>   |
| 6.8   | 2231.0085 | 1.0069  | <a href="#">ENLKGEQMSQAATICKSNEK</a>  |
| 6.8   | 2232.0224 | -0.0070 | <a href="#">MNLKGEQMSQAATICKSNEK</a>  |
| 6.8   | 2232.0224 | -0.0070 | <a href="#">MNLKGEQMSQAATICKSNEK</a>  |
| 6.8   | 2232.0224 | -0.0070 | <a href="#">MNLKGEQMSQAATICKSNEK</a>  |
| 6.8   | 2232.0224 | -0.0070 | <a href="#">MNLKGEQMSQAATICKSNEK</a>  |
| 6.8   | 2231.0085 | 1.0069  | <a href="#">QNLKGEQMSQAATICKSNEK</a>  |
| 1.4   | 2229.9987 | 2.0168  | <a href="#">ANEMNISPASLASLYEEDFK</a>  |
| 1.4   | 2231.0144 | 1.0011  | <a href="#">FHWGRENQRGSEHTVNEK</a>    |
| 1.4   | 2232.0222 | -0.0068 | <a href="#">GYPTYTNVEVVNDGAESAQEK</a> |

Mascot: <http://www.matrixscience.com/>

# Mascot Search Results

## Peptide View

MS/MS Fragmentation of **CTCVGNRGEWTCIAYSQLR**

Found in **P02751** in **uni\_human\_nr**, FINC\_HUMAN Fibronectin OS=Homo sapiens GN=FN1 PE=1 SV=4

Match to Query 13495: 2388.035472 from(797.019100,3+) intensity(2500728.5000) rtinseconds(2295) scans(14567) index(11697)

Title: 130806\_HPL\_Human\_Plaque\_BR1\_TR2\_03\_Spectrum035636\_scans\_\_14567\_RTINSECONDS=2295

Data file E:\\RAW\\HumanPlaques\\imgf\\T\\1D\\T130806\_HPL\_Human\_Plaque\_BR1\_TR2\_03.mgf

Click mouse within plot area to zoom in by factor of two about that point

Or, to Da

Label all possible matches Label matches used for scoring

Show Y-axis

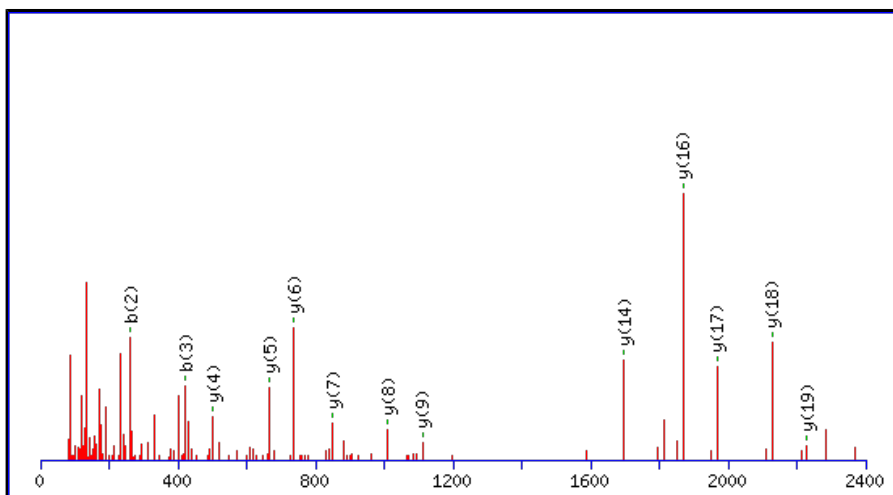

Monoisotopic mass of neutral peptide Mr(calc): 2388.0409

Fixed modifications: Carbamidomethyl (C) (apply to specified residues or termini only)

Variable modifications:

N6 : Deamidated (NQ)

Ions Score: 83 Expect: 1.5e-007

Matches : 13/210 fragment ions using 19 most intense peaks ([help](#))

| #  | b               | b <sup>++</sup> | b <sup>*</sup> | b <sup>***</sup> | b <sup>0</sup> | b <sup>0++</sup> | Seq. | y                | y <sup>++</sup> | y <sup>*</sup> | y <sup>***</sup> | y <sup>0</sup> | y <sup>0++</sup> | #  |
|----|-----------------|-----------------|----------------|------------------|----------------|------------------|------|------------------|-----------------|----------------|------------------|----------------|------------------|----|
| 1  | 161.0379        | 81.0226         |                |                  |                |                  | C    |                  |                 |                |                  |                |                  | 20 |
| 2  | <b>262.0856</b> | 131.5464        |                |                  | 244.0750       | 122.5412         | T    | <b>2229.0176</b> | 1115.0124       | 2211.9910      | 1106.4991        | 2211.0070      | 1106.0071        | 19 |
| 3  | <b>422.1163</b> | 211.5618        |                |                  | 404.1057       | 202.5565         | C    | <b>2127.9699</b> | 1064.4886       | 2110.9433      | 1055.9753        | 2109.9593      | 1055.4833        | 18 |
| 4  | 521.1847        | 261.0960        |                |                  | 503.1741       | 252.0907         | V    | <b>1967.9392</b> | 984.4732        | 1950.9127      | 975.9600         | 1949.9287      | 975.4680         | 17 |
| 5  | 578.2061        | 289.6067        |                |                  | 560.1956       | 280.6014         | G    | <b>1868.8708</b> | 934.9390        | 1851.8443      | 926.4258         | 1850.8602      | 925.9338         | 16 |
| 6  | 693.2331        | 347.1202        | 676.2065       | 338.6069         | 675.2225       | 338.1149         | N    | 1811.8493        | 906.4283        | 1794.8228      | 897.9150         | 1793.8388      | 897.4230         | 15 |
| 7  | 750.2545        | 375.6309        | 733.2280       | 367.1176         | 732.2440       | 366.6256         | G    | <b>1696.8224</b> | 848.9148        | 1679.7959      | 840.4016         | 1678.8118      | 839.9096         | 14 |
| 8  | 906.3556        | 453.6815        | 889.3291       | 445.1682         | 888.3451       | 444.6762         | R    | 1639.8009        | 820.4041        | 1622.7744      | 811.8908         | 1621.7904      | 811.3988         | 13 |
| 9  | 963.3771        | 482.1922        | 946.3506       | 473.6789         | 945.3665       | 473.1869         | G    | 1483.6998        | 742.3536        | 1466.6733      | 733.8403         | 1465.6893      | 733.3483         | 12 |
| 10 | 1092.4197       | 546.7135        | 1075.3932      | 538.2002         | 1074.4091      | 537.7082         | E    | 1426.6784        | 713.8428        | 1409.6518      | 705.3295         | 1408.6678      | 704.8375         | 11 |
| 11 | 1278.4990       | 639.7531        | 1261.4725      | 631.2399         | 1260.4885      | 630.7479         | W    | 1297.6358        | 649.3215        | 1280.6092      | 640.8082         | 1279.6252      | 640.3162         | 10 |
| 12 | 1379.5467       | 690.2770        | 1362.5201      | 681.7637         | 1361.5361      | 681.2717         | T    | <b>1111.5565</b> | 556.2819        | 1094.5299      | 547.7686         | 1093.5459      | 547.2766         | 9  |
| 13 | 1539.5773       | 770.2923        | 1522.5508      | 761.7790         | 1521.5668      | 761.2870         | C    | <b>1010.5088</b> | 505.7580        | 993.4822       | 497.2448         | 992.4982       | 496.7527         | 8  |
| 14 | 1652.6614       | 826.8343        | 1635.6349      | 818.3211         | 1634.6508      | 817.8291         | I    | <b>850.4781</b>  | 425.7427        | 833.4516       | 417.2294         | 832.4676       | 416.7374         | 7  |
| 15 | 1723.6985       | 862.3529        | 1706.6720      | 853.8396         | 1705.6880      | 853.3476         | A    | <b>737.3941</b>  | 369.2007        | 720.3675       | 360.6874         | 719.3835       | 360.1954         | 6  |
| 16 | 1886.7619       | 943.8846        | 1869.7353      | 935.3713         | 1868.7513      | 934.8793         | Y    | <b>666.3570</b>  | 333.6821        | 649.3304       | 325.1688         | 648.3464       | 324.6768         | 5  |
| 17 | 1973.7939       | 987.4006        | 1956.7673      | 978.8873         | 1955.7833      | 978.3953         | S    | <b>503.2936</b>  | 252.1504        | 486.2671       | 243.6372         | 485.2831       | 243.1452         | 4  |
| 18 | 2101.8525       | 1051.4299       | 2084.8259      | 1042.9166        | 2083.8419      | 1042.4246        | Q    | 416.2616         | 208.6344        | 399.2350       | 200.1212         |                |                  | 3  |

|    |           |           |           |           |           |           |   |          |          |          |          |  |  |   |
|----|-----------|-----------|-----------|-----------|-----------|-----------|---|----------|----------|----------|----------|--|--|---|
| 19 | 2214.9365 | 1107.9719 | 2197.9100 | 1099.4586 | 2196.9260 | 1098.9666 | L | 288.2030 | 144.6051 | 271.1765 | 136.0919 |  |  | 2 |
| 20 |           |           |           |           |           |           | R | 175.1190 | 88.0631  | 158.0924 | 79.5498  |  |  | 1 |

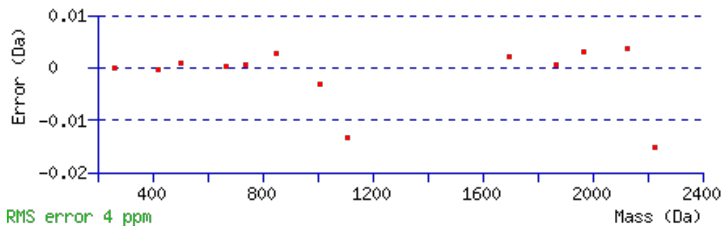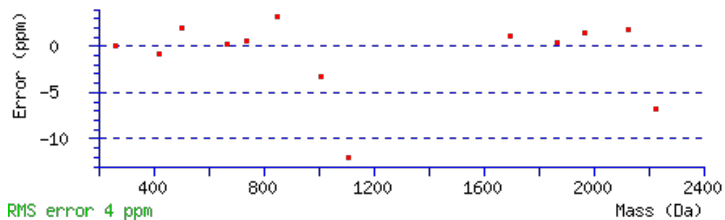

NCBI **BLAST** search of [CTCVGNRGEWTClAYSQlR](#)  
 (Parameters: blastp, nr protein database, expect=20000, no filter, PAM30)  
 Other BLAST [web gateways](#)

**All matches to this query**

| Score | Mr(calc)  | Delta   | Sequence                            | Site Analysis         |
|-------|-----------|---------|-------------------------------------|-----------------------|
| 83.1  | 2388.0409 | -0.0055 | <a href="#">CTCVGNRGEWTClAYSQlR</a> | Deamidated N6 100.00% |
| 10.1  | 2388.0409 | -0.0055 | <a href="#">CTCVGNRGEWTClAYSQlR</a> | Deamidated Q18 0.00%  |

Mascot: <http://www.matrixscience.com/>

# Mascot Search Results

## Peptide View

MS/MS Fragmentation of **CTCVGNRGEWTCIAYSQLR**

Found in **P02751** in **uni\_human\_nr**, FINC\_HUMAN Fibronectin OS=Homo sapiens GN=FN1 PE=1 SV=4

Match to Query 13958: 2387.054052 from(796.691960,3+) intensity(78002072.0000) rtinseconds(1933) scans(12127) index(9378)

Title: 130809\_HPL\_Human\_Plaque\_BR2\_TR3\_02\_Spectrum034231\_scans\_\_12127\_RTINSECONDS=1933

Data file E:\\RAW\\HumanPlaques\\imgf\\T\\1D\\T130809\_HPL\_Human\_Plaque\_BR2\_TR3\_02.mgf

Click mouse within plot area to zoom in by factor of two about that point

Or,  to  Da

Label all possible matches  Label matches used for scoring

Show Y-axis

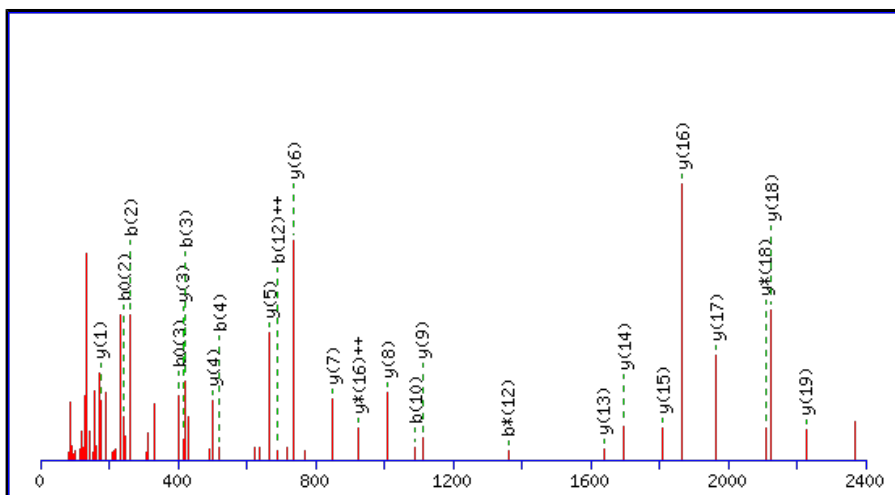

Monoisotopic mass of neutral peptide **Mr(calc): 2387.0569**

Fixed modifications: Carbamidomethyl (C) (apply to specified residues or termini only)

Ions Score: 112 Expect: 2.7e-010

Matches : 25/210 fragment ions using 42 most intense peaks ([help](#))

| #  | b                | b <sup>++</sup> | b*               | b <sup>*++</sup> | b <sup>0</sup>  | b <sup>0++</sup> | Seq. | y                | y <sup>++</sup> | y*               | y <sup>*++</sup> | y <sup>0</sup> | y <sup>0++</sup> | #  |
|----|------------------|-----------------|------------------|------------------|-----------------|------------------|------|------------------|-----------------|------------------|------------------|----------------|------------------|----|
| 1  | 161.0379         | 81.0226         |                  |                  |                 |                  | C    |                  |                 |                  |                  |                |                  | 20 |
| 2  | <b>262.0856</b>  | 131.5464        |                  |                  | <b>244.0750</b> | 122.5412         | T    | <b>2228.0335</b> | 1114.5204       | 2211.0070        | 1106.0071        | 2210.0230      | 1105.5151        | 19 |
| 3  | <b>422.1163</b>  | 211.5618        |                  |                  | <b>404.1057</b> | 202.5565         | C    | <b>2126.9859</b> | 1063.9966       | <b>2109.9593</b> | 1055.4833        | 2108.9753      | 1054.9913        | 18 |
| 4  | <b>521.1847</b>  | 261.0960        |                  |                  | 503.1741        | 252.0907         | V    | <b>1966.9552</b> | 983.9812        | 1949.9287        | 975.4680         | 1948.9446      | 974.9760         | 17 |
| 5  | 578.2061         | 289.6067        |                  |                  | 560.1956        | 280.6014         | G    | <b>1867.8868</b> | 934.4470        | 1850.8602        | <b>925.9338</b>  | 1849.8762      | 925.4418         | 16 |
| 6  | 692.2491         | 346.6282        | 675.2225         | 338.1149         | 674.2385        | 337.6229         | N    | <b>1810.8653</b> | 905.9363        | 1793.8388        | 897.4230         | 1792.8548      | 896.9310         | 15 |
| 7  | 749.2705         | 375.1389        | 732.2440         | 366.6256         | 731.2600        | 366.1336         | G    | <b>1696.8224</b> | 848.9148        | 1679.7959        | 840.4016         | 1678.8118      | 839.9096         | 14 |
| 8  | 905.3716         | 453.1895        | 888.3451         | 444.6762         | 887.3611        | 444.1842         | R    | <b>1639.8009</b> | 820.4041        | 1622.7744        | 811.8908         | 1621.7904      | 811.3988         | 13 |
| 9  | 962.3931         | 481.7002        | 945.3665         | 473.1869         | 944.3825        | 472.6949         | G    | 1483.6998        | 742.3536        | 1466.6733        | 733.8403         | 1465.6893      | 733.3483         | 12 |
| 10 | <b>1091.4357</b> | 546.2215        | 1074.4091        | 537.7082         | 1073.4251       | 537.2162         | E    | 1426.6784        | 713.8428        | 1409.6518        | 705.3295         | 1408.6678      | 704.8375         | 11 |
| 11 | 1277.5150        | 639.2611        | 1260.4885        | 630.7479         | 1259.5044       | 630.2559         | W    | 1297.6358        | 649.3215        | 1280.6092        | 640.8082         | 1279.6252      | 640.3162         | 10 |
| 12 | 1378.5627        | <b>689.7850</b> | <b>1361.5361</b> | 681.2717         | 1360.5521       | 680.7797         | T    | <b>1111.5565</b> | 556.2819        | 1094.5299        | 547.7686         | 1093.5459      | 547.2766         | 9  |
| 13 | 1538.5933        | 769.8003        | 1521.5668        | 761.2870         | 1520.5828       | 760.7950         | C    | <b>1010.5088</b> | 505.7580        | 993.4822         | 497.2448         | 992.4982       | 496.7527         | 8  |
| 14 | 1651.6774        | 826.3423        | 1634.6508        | 817.8291         | 1633.6668       | 817.3371         | I    | <b>850.4781</b>  | 425.7427        | 833.4516         | 417.2294         | 832.4676       | 416.7374         | 7  |
| 15 | 1722.7145        | 861.8609        | 1705.6880        | 853.3476         | 1704.7039       | 852.8556         | A    | <b>737.3941</b>  | 369.2007        | 720.3675         | 360.6874         | 719.3835       | 360.1954         | 6  |
| 16 | 1885.7778        | 943.3926        | 1868.7513        | 934.8793         | 1867.7673       | 934.3873         | Y    | <b>666.3570</b>  | 333.6821        | 649.3304         | 325.1688         | 648.3464       | 324.6768         | 5  |
| 17 | 1972.8099        | 986.9086        | 1955.7833        | 978.3953         | 1954.7993       | 977.9033         | S    | <b>503.2936</b>  | 252.1504        | 486.2671         | 243.6372         | 485.2831       | 243.1452         | 4  |
| 18 | 2100.8684        | 1050.9379       | 2083.8419        | 1042.4246        | 2082.8579       | 1041.9326        | Q    | <b>416.2616</b>  | 208.6344        | 399.2350         | 200.1212         |                |                  | 3  |
| 19 | 2213.9525        | 1107.4799       | 2196.9260        | 1098.9666        | 2195.9419       | 1098.4746        | L    | 288.2030         | 144.6051        | 271.1765         | 136.0919         |                |                  | 2  |

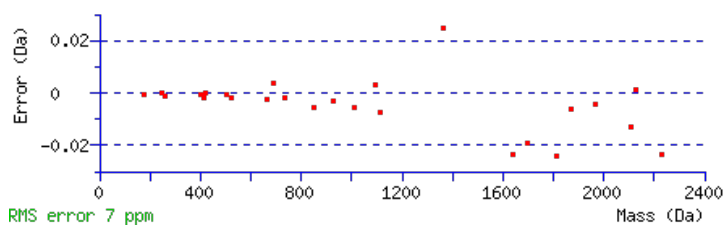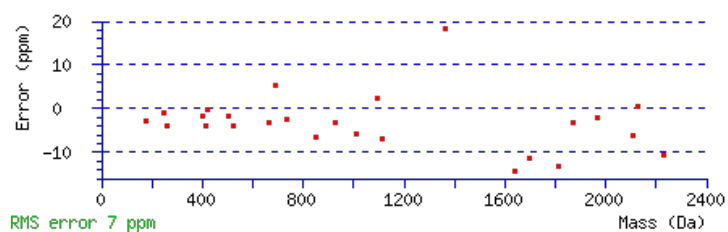

NCBI **BLAST** search of [CTCVGNRGEWTCIAYSQLR](#)  
 (Parameters: blastp, nr protein database, expect=20000, no filter, PAM30)  
 Other BLAST [web gateways](#)

**All matches to this query**

| Score | Mr(calc)  | Delta   | Sequence                            |
|-------|-----------|---------|-------------------------------------|
| 112.0 | 2387.0569 | -0.0029 | <a href="#">CTCVGNRGEWTCIAYSQLR</a> |

Mascot: <http://www.matrixscience.com/>

# Mascot Search Results

## Peptide View

MS/MS Fragmentation of **CTCVGNRGEWTCIAYSQLR**

Found in **P02751** in **uni\_human\_nr**, FINC\_HUMAN Fibronectin OS=Homo sapiens GN=FN1 PE=1 SV=4

Match to Query 13415: 2387.061868 from(1194.538210,2+) intensity(4408756.0000) rtinseconds(1950) scans(11628) index(8779)

Title: 130801\_HPL\_Human\_Plaque\_BR2\_TR1\_02\_Spectrum032934\_scans\_\_11628\_RTINSECONDS=1950

Data file E:\\RAW\\HumanPlaques\\mgf\\T\\1D\\T130801\_HPL\_Human\_Plaque\_BR2\_TR1\_02.mgf

Click mouse within plot area to zoom in by factor of two about that point

Or, to Da

Label all possible matches Label matches used for scoring

Show Y-axis

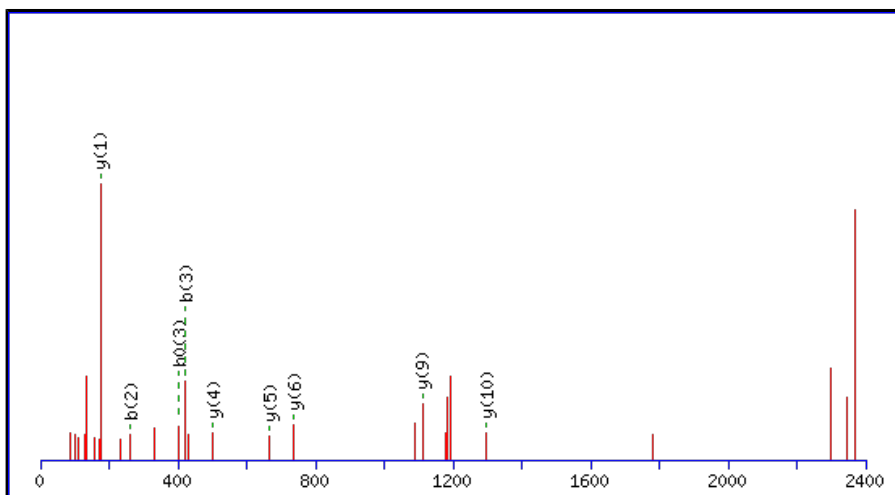

Monoisotopic mass of neutral peptide **Mr(calc): 2387.0569**

Fixed modifications: Carbamidomethyl (C) (apply to specified residues or termini only)

Ions Score: 34 Expect: 0.017

Matches : 9/210 fragment ions using 17 most intense peaks ([help](#))

| #  | b               | b <sup>++</sup> | b*        | b <sup>***</sup> | b <sup>0</sup>  | b <sup>0++</sup> | Seq. | y                | y <sup>++</sup> | y*        | y <sup>***</sup> | y <sup>0</sup> | y <sup>0++</sup> | #  |
|----|-----------------|-----------------|-----------|------------------|-----------------|------------------|------|------------------|-----------------|-----------|------------------|----------------|------------------|----|
| 1  | 161.0379        | 81.0226         |           |                  |                 |                  | C    |                  |                 |           |                  |                |                  | 20 |
| 2  | <b>262.0856</b> | 131.5464        |           |                  | 244.0750        | 122.5412         | T    | 2228.0335        | 1114.5204       | 2211.0070 | 1106.0071        | 2210.0230      | 1105.5151        | 19 |
| 3  | <b>422.1163</b> | 211.5618        |           |                  | <b>404.1057</b> | 202.5565         | C    | 2126.9859        | 1063.9966       | 2109.9593 | 1055.4833        | 2108.9753      | 1054.9913        | 18 |
| 4  | 521.1847        | 261.0960        |           |                  | 503.1741        | 252.0907         | V    | 1966.9552        | 983.9812        | 1949.9287 | 975.4680         | 1948.9446      | 974.9760         | 17 |
| 5  | 578.2061        | 289.6067        |           |                  | 560.1956        | 280.6014         | G    | 1867.8868        | 934.4470        | 1850.8602 | 925.9338         | 1849.8762      | 925.4418         | 16 |
| 6  | 692.2491        | 346.6282        | 675.2225  | 338.1149         | 674.2385        | 337.6229         | N    | 1810.8653        | 905.9363        | 1793.8388 | 897.4230         | 1792.8548      | 896.9310         | 15 |
| 7  | 749.2705        | 375.1389        | 732.2440  | 366.6256         | 731.2600        | 366.1336         | G    | 1696.8224        | 848.9148        | 1679.7959 | 840.4016         | 1678.8118      | 839.9096         | 14 |
| 8  | 905.3716        | 453.1895        | 888.3451  | 444.6762         | 887.3611        | 444.1842         | R    | 1639.8009        | 820.4041        | 1622.7744 | 811.8908         | 1621.7904      | 811.3988         | 13 |
| 9  | 962.3931        | 481.7002        | 945.3665  | 473.1869         | 944.3825        | 472.6949         | G    | 1483.6998        | 742.3536        | 1466.6733 | 733.8403         | 1465.6893      | 733.3483         | 12 |
| 10 | 1091.4357       | 546.2215        | 1074.4091 | 537.7082         | 1073.4251       | 537.2162         | E    | 1426.6784        | 713.8428        | 1409.6518 | 705.3295         | 1408.6678      | 704.8375         | 11 |
| 11 | 1277.5150       | 639.2611        | 1260.4885 | 630.7479         | 1259.5044       | 630.2559         | W    | <b>1297.6358</b> | 649.3215        | 1280.6092 | 640.8082         | 1279.6252      | 640.3162         | 10 |
| 12 | 1378.5627       | 689.7850        | 1361.5361 | 681.2717         | 1360.5521       | 680.7797         | T    | <b>1111.5565</b> | 556.2819        | 1094.5299 | 547.7686         | 1093.5459      | 547.2766         | 9  |
| 13 | 1538.5933       | 769.8003        | 1521.5668 | 761.2870         | 1520.5828       | 760.7950         | C    | 1010.5088        | 505.7580        | 993.4822  | 497.2448         | 992.4982       | 496.7527         | 8  |
| 14 | 1651.6774       | 826.3423        | 1634.6508 | 817.8291         | 1633.6668       | 817.3371         | I    | 850.4781         | 425.7427        | 833.4516  | 417.2294         | 832.4676       | 416.7374         | 7  |
| 15 | 1722.7145       | 861.8609        | 1705.6880 | 853.3476         | 1704.7039       | 852.8556         | A    | <b>737.3941</b>  | 369.2007        | 720.3675  | 360.6874         | 719.3835       | 360.1954         | 6  |
| 16 | 1885.7778       | 943.3926        | 1868.7513 | 934.8793         | 1867.7673       | 934.3873         | Y    | <b>666.3570</b>  | 333.6821        | 649.3304  | 325.1688         | 648.3464       | 324.6768         | 5  |
| 17 | 1972.8099       | 986.9086        | 1955.7833 | 978.3953         | 1954.7993       | 977.9033         | S    | <b>503.2936</b>  | 252.1504        | 486.2671  | 243.6372         | 485.2831       | 243.1452         | 4  |
| 18 | 2100.8684       | 1050.9379       | 2083.8419 | 1042.4246        | 2082.8579       | 1041.9326        | Q    | 416.2616         | 208.6344        | 399.2350  | 200.1212         |                |                  | 3  |
| 19 | 2213.9525       | 1107.4799       | 2196.9260 | 1098.9666        | 2195.9419       | 1098.4746        | L    | 288.2030         | 144.6051        | 271.1765  | 136.0919         |                |                  | 2  |

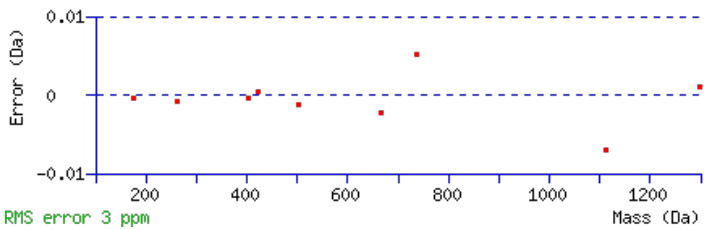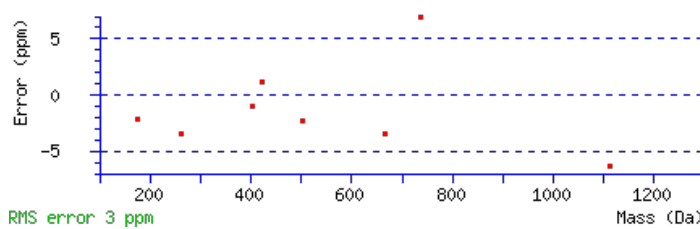

NCBI BLAST search of [CTCVGNRGEWTCIAYSQLR](#)  
 (Parameters: blastp, nr protein database, expect=20000, no filter, PAM30)  
 Other BLAST [web gateways](#)

All matches to this query

| Score | Mr(calc)  | Delta   | Sequence                               |
|-------|-----------|---------|----------------------------------------|
| 34.3  | 2387.0569 | 0.0050  | <a href="#">CTCVGNRGEWTCIAYSQLR</a>    |
| 2.2   | 2387.0674 | -0.0056 | <a href="#">MASSGMADSANHLPFFFGNITR</a> |
| 2.2   | 2387.0674 | -0.0056 | <a href="#">MASSGMADSANHLPFFFGNITR</a> |
| 1.7   | 2387.0634 | -0.0016 | <a href="#">VCGLCGNEDDIAVNDEFATRSR</a> |
| 1.7   | 2387.0634 | -0.0016 | <a href="#">VCGLCGNEDDIAVNDEFATRSR</a> |
| 1.7   | 2387.0699 | -0.0080 | <a href="#">EQQQLSDVCYRQASQLEFR</a>    |
| 1.7   | 2387.0636 | -0.0017 | <a href="#">MQFMKYMVYPQTFALNADR</a>    |
| 1.7   | 2387.0636 | -0.0017 | <a href="#">MQFMKYMVYPQTFALNADR</a>    |
| 1.7   | 2387.0636 | -0.0017 | <a href="#">MQFMKYMVYPQTFALNADR</a>    |
| 1.7   | 2387.0699 | -0.0080 | <a href="#">QQQQLSDVCYRQASQLEFR</a>    |

Mascot: <http://www.matrixscience.com/>

# Mascot Search Results

## Peptide View

MS/MS Fragmentation of **DNRGNLLQCICTGNGR**

Found in **P02751** in **uni\_human\_nr**, FINC\_HUMAN Fibronectin OS=Homo sapiens GN=FN1 PE=1 SV=4

Match to Query 5968: 1847.836992 from(616.952940,3+) intensity(291876.9063) rtinseconds(1956) scans(10328) index(7461)

Title: 130801\_HPL\_Human\_Plaque\_BR2\_TR1\_10\_Spectrum028016\_scans\_\_10328\_RTINSECONDS=1956

Data file E:\RAW\HumanPlaques\mgf\T\1D\T130801\_HPL\_Human\_Plaque\_BR2\_TR1\_10.mgf

Click mouse within plot area to zoom in by factor of two about that point

Or,  to  Da

Label all possible matches  Label matches used for scoring

Show Y-axis

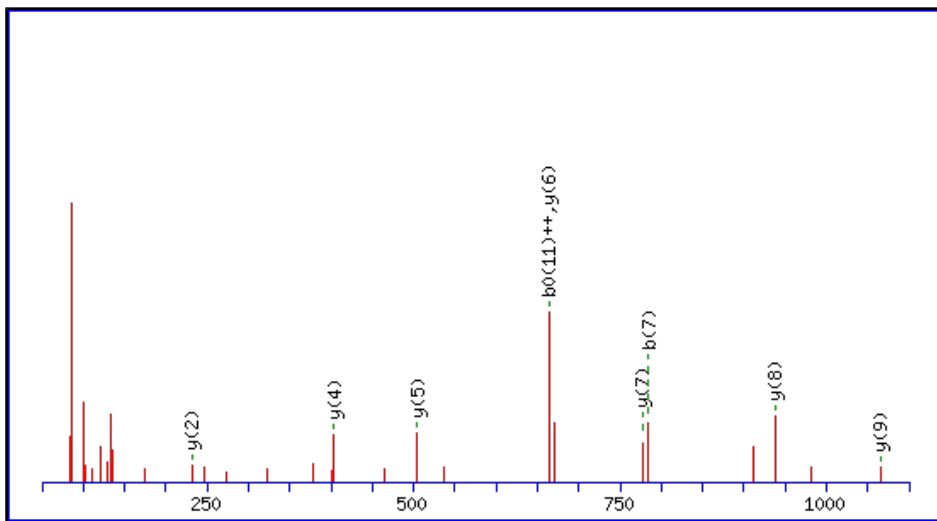

**Monoisotopic mass of neutral peptide Mr(calc):** 1847.8367

**Fixed modifications:** Carbamidomethyl (C) (apply to specified residues or termini only)

**Variable modifications:**

N5 : Deamidated (NQ)

**Ions Score:** 56 **Expect:** 0.00012

**Matches :** 9/170 fragment ions using 10 most intense peaks ([help](#))

| #  | b               | b <sup>++</sup> | b <sup>*</sup> | b <sup>*++</sup> | b <sup>0</sup> | b <sup>0++</sup> | Seq. | y                | y <sup>++</sup> | y <sup>*</sup> | y <sup>*++</sup> | y <sup>0</sup> | y <sup>0++</sup> | #  |
|----|-----------------|-----------------|----------------|------------------|----------------|------------------|------|------------------|-----------------|----------------|------------------|----------------|------------------|----|
| 1  | 116.0342        | 58.5207         |                |                  | 98.0237        | 49.5155          | D    |                  |                 |                |                  |                |                  | 16 |
| 2  | 230.0771        | 115.5422        | 213.0506       | 107.0289         | 212.0666       | 106.5369         | N    | 1733.8170        | 867.4121        | 1716.7904      | 858.8989         | 1715.8064      | 858.4069         | 15 |
| 3  | 386.1783        | 193.5928        | 369.1517       | 185.0795         | 368.1677       | 184.5875         | R    | 1619.7741        | 810.3907        | 1602.7475      | 801.8774         | 1601.7635      | 801.3854         | 14 |
| 4  | 443.1997        | 222.1035        | 426.1732       | 213.5902         | 425.1892       | 213.0982         | G    | 1463.6730        | 732.3401        | 1446.6464      | 723.8268         | 1445.6624      | 723.3348         | 13 |
| 5  | 558.2267        | 279.6170        | 541.2001       | 271.1037         | 540.2161       | 270.6117         | N    | 1406.6515        | 703.8294        | 1389.6249      | 695.3161         | 1388.6409      | 694.8241         | 12 |
| 6  | 671.3107        | 336.1590        | 654.2842       | 327.6457         | 653.3002       | 327.1537         | L    | 1291.6246        | 646.3159        | 1274.5980      | 637.8026         | 1273.6140      | 637.3106         | 11 |
| 7  | <b>784.3948</b> | 392.7010        | 767.3682       | 384.1878         | 766.3842       | 383.6958         | L    | 1178.5405        | 589.7739        | 1161.5139      | 581.2606         | 1160.5299      | 580.7686         | 10 |
| 8  | 912.4534        | 456.7303        | 895.4268       | 448.2170         | 894.4428       | 447.7250         | Q    | <b>1065.4564</b> | 533.2319        | 1048.4299      | 524.7186         | 1047.4459      | 524.2266         | 9  |
| 9  | 1072.4840       | 536.7456        | 1055.4575      | 528.2324         | 1054.4735      | 527.7404         | C    | <b>937.3978</b>  | 469.2026        | 920.3713       | 460.6893         | 919.3873       | 460.1973         | 8  |
| 10 | 1185.5681       | 593.2877        | 1168.5415      | 584.7744         | 1167.5575      | 584.2824         | I    | <b>777.3672</b>  | 389.1872        | 760.3406       | 380.6740         | 759.3566       | 380.1820         | 7  |
| 11 | 1345.5987       | 673.3030        | 1328.5722      | 664.7897         | 1327.5882      | 664.2977         | C    | <b>664.2831</b>  | 332.6452        | 647.2566       | 324.1319         | 646.2726       | 323.6399         | 6  |
| 12 | 1446.6464       | 723.8268        | 1429.6199      | 715.3136         | 1428.6358      | 714.8216         | T    | <b>504.2525</b>  | 252.6299        | 487.2259       | 244.1166         | 486.2419       | 243.6246         | 5  |
| 13 | 1503.6679       | 752.3376        | 1486.6413      | 743.8243         | 1485.6573      | 743.3323         | G    | <b>403.2048</b>  | 202.1060        | 386.1783       | 193.5928         |                |                  | 4  |
| 14 | 1617.7108       | 809.3590        | 1600.6843      | 800.8458         | 1599.7002      | 800.3538         | N    | 346.1833         | 173.5953        | 329.1568       | 165.0820         |                |                  | 3  |
| 15 | 1674.7323       | 837.8698        | 1657.7057      | 829.3565         | 1656.7217      | 828.8645         | G    | <b>232.1404</b>  | 116.5738        | 215.1139       | 108.0606         |                |                  | 2  |



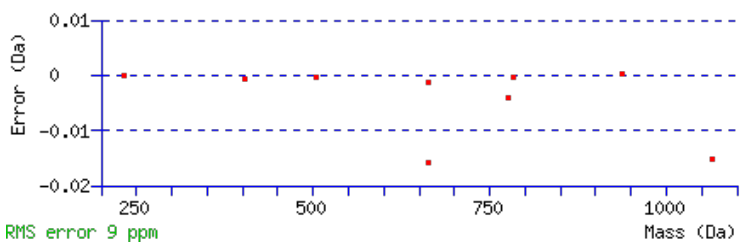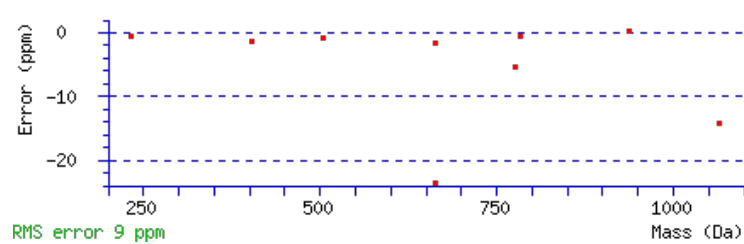

NCBI BLAST search of [DNRGNLLQCICTGNGR](#)

(Parameters: blastp, nr protein database, expect=20000, no filter, PAM30)

Other BLAST [web gateways](#)

All matches to this query

| Score | Mr(calc)  | Delta  | Sequence                         | Site Analysis        |
|-------|-----------|--------|----------------------------------|----------------------|
| 55.7  | 1847.8367 | 0.0003 | <a href="#">DNRGNLLQCICTGNGR</a> | Deamidated N5 49.44% |
| 55.7  | 1847.8367 | 0.0003 | <a href="#">DNRGNLLQCICTGNGR</a> | Deamidated N2 49.44% |
| 36.7  | 1847.8367 | 0.0003 | <a href="#">DNRGNLLQCICTGNGR</a> | Deamidated Q8 0.63%  |

Mascot: <http://www.matrixscience.com/>

# Mascot Search Results

## Peptide View

MS/MS Fragmentation of **DNRGNLLQCICTGNRGEWK**

Found in **P02751** in **uni\_human\_nr**, FINC\_HUMAN Fibronectin OS=Homo sapiens GN=FN1 PE=1 SV=4

Match to Query 8801: 2349.059016 from(588.272030,4+) intensity(335275.2500) rtinseconds(2279) scans(12331) index(8907)

Title: 130801\_HPL\_Human\_Plaque\_BR1\_TR1\_13\_Spectrum029377\_scans\_\_12331\_RTINSECONDS=2279

Data file E:\\RAW\\HumanPlaques\\imgf\\T\\1D\\T130801\_HPL\_Human\_Plaque\_BR1\_TR1\_13.mgf

Click mouse within plot area to zoom in by factor of two about that point

Or,  to  Da  
 Label all possible matches  Label matches used for scoring   
 Show Y-axis

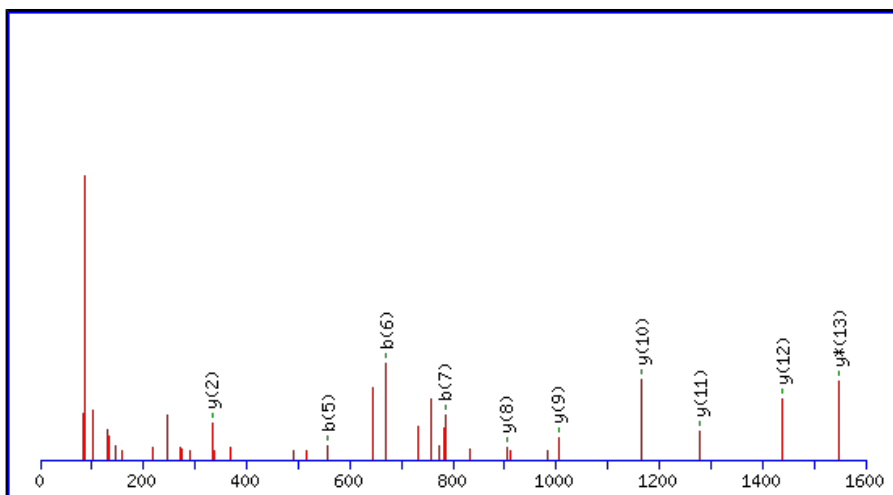

Monoisotopic mass of neutral peptide **Mr(calc):** 2349.0590

**Fixed modifications:** Carbamidomethyl (C) (apply to specified residues or termini only)

**Variable modifications:**

N5 : Deamidated (NQ)

N14 : Deamidated (NQ)

**Ions Score:** 42 **Expect:** 0.0034

**Matches :** 10/222 fragment ions using 13 most intense peaks ([help](#))

| #  | b               | b <sup>++</sup> | b <sup>*</sup> | b <sup>***</sup> | b <sup>0</sup> | b <sup>0++</sup> | Seq. | y                | y <sup>++</sup> | y <sup>*</sup>   | y <sup>***</sup> | y <sup>0</sup> | y <sup>0++</sup> | #  |
|----|-----------------|-----------------|----------------|------------------|----------------|------------------|------|------------------|-----------------|------------------|------------------|----------------|------------------|----|
| 1  | 116.0342        | 58.5207         |                |                  | 98.0237        | 49.5155          | D    |                  |                 |                  |                  |                |                  | 20 |
| 2  | 230.0771        | 115.5422        | 213.0506       | 107.0289         | 212.0666       | 106.5369         | N    | 2235.0393        | 1118.0233       | 2218.0128        | 1109.5100        | 2217.0288      | 1109.0180        | 19 |
| 3  | 386.1783        | 193.5928        | 369.1517       | 185.0795         | 368.1677       | 184.5875         | R    | 2120.9964        | 1061.0018       | 2103.9699        | 1052.4886        | 2102.9859      | 1051.9966        | 18 |
| 4  | 443.1997        | 222.1035        | 426.1732       | 213.5902         | 425.1892       | 213.0982         | G    | 1964.8953        | 982.9513        | 1947.8688        | 974.4380         | 1946.8847      | 973.9460         | 17 |
| 5  | <b>558.2267</b> | 279.6170        | 541.2001       | 271.1037         | 540.2161       | 270.6117         | N    | 1907.8738        | 954.4406        | 1890.8473        | 945.9273         | 1889.8633      | 945.4353         | 16 |
| 6  | <b>671.3107</b> | 336.1590        | 654.2842       | 327.6457         | 653.3002       | 327.1537         | L    | 1792.8469        | 896.9271        | 1775.8204        | 888.4138         | 1774.8363      | 887.9218         | 15 |
| 7  | <b>784.3948</b> | 392.7010        | 767.3682       | 384.1878         | 766.3842       | 383.6958         | L    | 1679.7628        | 840.3851        | 1662.7363        | 831.8718         | 1661.7523      | 831.3798         | 14 |
| 8  | 912.4534        | 456.7303        | 895.4268       | 448.2170         | 894.4428       | 447.7250         | Q    | 1566.6788        | 783.8430        | <b>1549.6522</b> | 775.3298         | 1548.6682      | 774.8377         | 13 |
| 9  | 1072.4840       | 536.7456        | 1055.4575      | 528.2324         | 1054.4735      | 527.7404         | C    | <b>1438.6202</b> | 719.8137        | 1421.5936        | 711.3005         | 1420.6096      | 710.8085         | 12 |
| 10 | 1185.5681       | 593.2877        | 1168.5415      | 584.7744         | 1167.5575      | 584.2824         | I    | <b>1278.5895</b> | 639.7984        | 1261.5630        | 631.2851         | 1260.5790      | 630.7931         | 11 |
| 11 | 1345.5987       | 673.3030        | 1328.5722      | 664.7897         | 1327.5882      | 664.2977         | C    | <b>1165.5055</b> | 583.2564        | 1148.4789        | 574.7431         | 1147.4949      | 574.2511         | 10 |
| 12 | 1446.6464       | 723.8268        | 1429.6199      | 715.3136         | 1428.6358      | 714.8216         | T    | <b>1005.4748</b> | 503.2411        | 988.4483         | 494.7278         | 987.4643       | 494.2358         | 9  |
| 13 | 1503.6679       | 752.3376        | 1486.6413      | 743.8243         | 1485.6573      | 743.3323         | G    | <b>904.4272</b>  | 452.7172        | 887.4006         | 444.2039         | 886.4166       | 443.7119         | 8  |
| 14 | 1618.6948       | 809.8510        | 1601.6683      | 801.3378         | 1600.6843      | 800.8458         | N    | 847.4057         | 424.2065        | 830.3791         | 415.6932         | 829.3951       | 415.2012         | 7  |
| 15 | 1675.7163       | 838.3618        | 1658.6897      | 829.8485         | 1657.7057      | 829.3565         | G    | 732.3787         | 366.6930        | 715.3522         | 358.1797         | 714.3682       | 357.6877         | 6  |
| 16 | 1831.8174       | 916.4123        | 1814.7908      | 907.8991         | 1813.8068      | 907.4071         | R    | 675.3573         | 338.1823        | 658.3307         | 329.6690         | 657.3467       | 329.1770         | 5  |
| 17 | 1888.8389       | 944.9231        | 1871.8123      | 936.4098         | 1870.8283      | 935.9178         | G    | 519.2562         | 260.1317        | 502.2296         | 251.6185         | 501.2456       | 251.1264         | 4  |

|    |           |           |           |           |           |           |   |          |          |          |          |          |          |   |
|----|-----------|-----------|-----------|-----------|-----------|-----------|---|----------|----------|----------|----------|----------|----------|---|
| 18 | 2017.8814 | 1009.4444 | 2000.8549 | 1000.9311 | 1999.8709 | 1000.4391 | E | 462.2347 | 231.6210 | 445.2082 | 223.1077 | 444.2241 | 222.6157 | 3 |
| 19 | 2203.9608 | 1102.4840 | 2186.9342 | 1093.9707 | 2185.9502 | 1093.4787 | W | 333.1921 | 167.0997 | 316.1656 | 158.5864 |          |          | 2 |
| 20 |           |           |           |           |           |           | K | 147.1128 | 74.0600  | 130.0863 | 65.5468  |          |          | 1 |

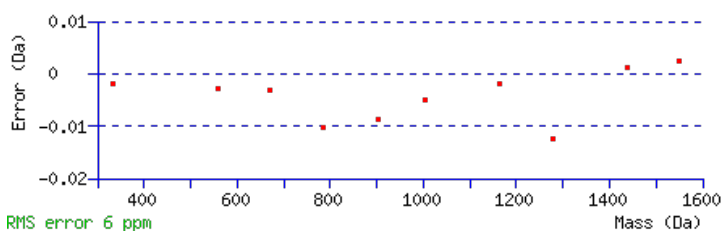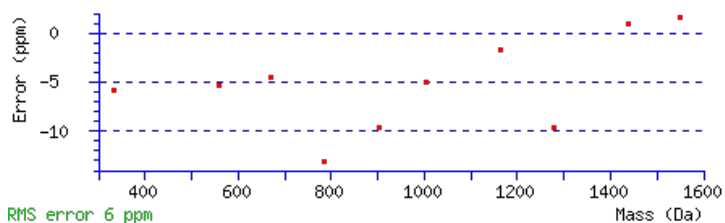

NCBI BLAST search of [DNRGNLLQCICTGNRGEWK](#)  
 (Parameters: blastp, nr protein database, expect=20000, no filter, PAM30)

Other BLAST [web gateways](#)

**All matches to this query**

| Score | Mr(calc)  | Delta  | Sequence                            | Site Analysis             |
|-------|-----------|--------|-------------------------------------|---------------------------|
| 42.0  | 2349.0590 | 0.0000 | <a href="#">DNRGNLLQCICTGNRGEWK</a> | Deamidated N5, N14 48.79% |
| 42.0  | 2349.0590 | 0.0000 | <a href="#">DNRGNLLQCICTGNRGEWK</a> | Deamidated N2, N14 48.79% |
| 28.9  | 2349.0590 | 0.0000 | <a href="#">DNRGNLLQCICTGNRGEWK</a> | Deamidated Q8, N14 2.41%  |
| 4.7   | 2349.0590 | 0.0000 | <a href="#">DNRGNLLQCICTGNRGEWK</a> | Deamidated N2, Q8 0.01%   |
| 4.0   | 2349.0590 | 0.0000 | <a href="#">DNRGNLLQCICTGNRGEWK</a> | Deamidated N5, Q8 0.01%   |

Mascot: <http://www.matrixscience.com/>

# Mascot Search Results

## Peptide View

MS/MS Fragmentation of **EDRVPHSRNSITLTNLTPGTEYVVSIVALNGR**

Found in **P02751** in **uni\_human\_nr**, FINC\_HUMAN Fibronectin OS=Homo sapiens GN=FN1 PE=1 SV=4

Match to Query 18517: 3509.813470 from(702.969970,5+) intensity(196140.3125) rtinseconds(3014) scans(18986) index(15255)

Title: 130806\_HPL\_Human\_Plaque\_BR1\_TR2\_05\_Spectrum038051\_scans\_\_18986\_RTINSECONDS=3014

Data file E:\\RAW\\HumanPlaques\\mgf\\T\\1D\\T130806\_HPL\_Human\_Plaque\_BR1\_TR2\_05.mgf

Click mouse within plot area to zoom in by factor of two about that point

Or, to Da

Label all possible matches Label matches used for scoring

Show Y-axis

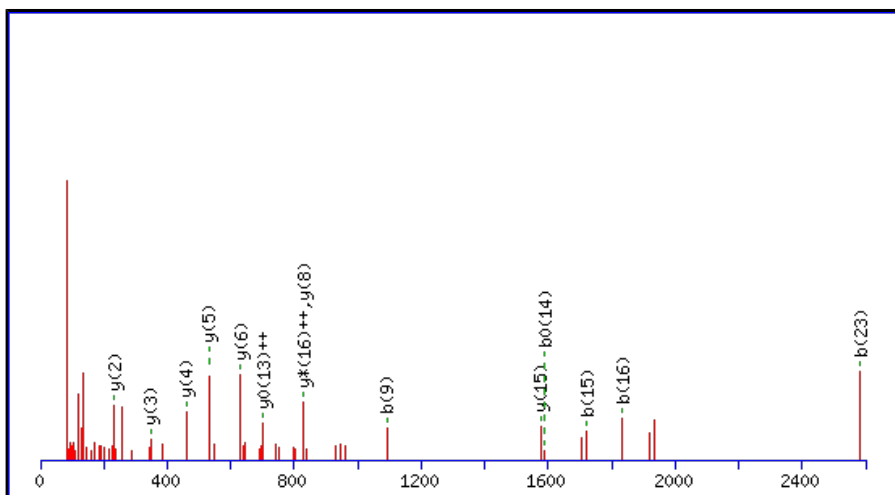

Monoisotopic mass of neutral peptide Mr(calc): 3509.8114

Fixed modifications: Carbamidomethyl (C) (apply to specified residues or termini only)

Variable modifications:

N9 : Deamidated (NQ)

N30 : Deamidated (NQ)

Ions Score: 51 Expect: 0.00046

Matches : 14/354 fragment ions using 16 most intense peaks ([help](#))

| #  | b                | b <sup>++</sup> | b <sup>*</sup> | b <sup>***</sup> | b <sup>0</sup>   | b <sup>0++</sup> | Seq. | y         | y <sup>++</sup> | y <sup>*</sup> | y <sup>***</sup> | y <sup>0</sup> | y <sup>0++</sup> | #  |
|----|------------------|-----------------|----------------|------------------|------------------|------------------|------|-----------|-----------------|----------------|------------------|----------------|------------------|----|
| 1  | 130.0499         | 65.5286         |                |                  | 112.0393         | 56.5233          | E    |           |                 |                |                  |                |                  | 32 |
| 2  | 245.0768         | 123.0420        |                |                  | 227.0662         | 114.0368         | D    | 3381.7761 | 1691.3917       | 3364.7496      | 1682.8784        | 3363.7655      | 1682.3864        | 31 |
| 3  | 401.1779         | 201.0926        | 384.1514       | 192.5793         | 383.1674         | 192.0873         | R    | 3266.7492 | 1633.8782       | 3249.7226      | 1625.3649        | 3248.7386      | 1624.8729        | 30 |
| 4  | 500.2463         | 250.6268        | 483.2198       | 242.1135         | 482.2358         | 241.6215         | V    | 3110.6481 | 1555.8277       | 3093.6215      | 1547.3144        | 3092.6375      | 1546.8224        | 29 |
| 5  | 597.2991         | 299.1532        | 580.2726       | 290.6399         | 579.2885         | 290.1479         | P    | 3011.5796 | 1506.2935       | 2994.5531      | 1497.7802        | 2993.5691      | 1497.2882        | 28 |
| 6  | 734.3580         | 367.6826        | 717.3315       | 359.1694         | 716.3474         | 358.6774         | H    | 2914.5269 | 1457.7671       | 2897.5003      | 1449.2538        | 2896.5163      | 1448.7618        | 27 |
| 7  | 821.3900         | 411.1987        | 804.3635       | 402.6854         | 803.3795         | 402.1934         | S    | 2777.4680 | 1389.2376       | 2760.4414      | 1380.7243        | 2759.4574      | 1380.2323        | 26 |
| 8  | 977.4912         | 489.2492        | 960.4646       | 480.7359         | 959.4806         | 480.2439         | R    | 2690.4359 | 1345.7216       | 2673.4094      | 1337.2083        | 2672.4254      | 1336.7163        | 25 |
| 9  | <b>1092.5181</b> | 546.7627        | 1075.4915      | 538.2494         | 1074.5075        | 537.7574         | N    | 2534.3348 | 1267.6711       | 2517.3083      | 1259.1578        | 2516.3243      | 1258.6658        | 24 |
| 10 | 1179.5501        | 590.2787        | 1162.5236      | 581.7654         | 1161.5396        | 581.2734         | S    | 2419.3079 | 1210.1576       | 2402.2813      | 1201.6443        | 2401.2973      | 1201.1523        | 23 |
| 11 | 1292.6342        | 646.8207        | 1275.6076      | 638.3075         | 1274.6236        | 637.8154         | I    | 2332.2759 | 1166.6416       | 2315.2493      | 1158.1283        | 2314.2653      | 1157.6363        | 22 |
| 12 | 1393.6819        | 697.3446        | 1376.6553      | 688.8313         | 1375.6713        | 688.3393         | T    | 2219.1918 | 1110.0995       | 2202.1652      | 1101.5863        | 2201.1812      | 1101.0943        | 21 |
| 13 | 1506.7659        | 753.8866        | 1489.7394      | 745.3733         | 1488.7554        | 744.8813         | L    | 2118.1441 | 1059.5757       | 2101.1176      | 1051.0624        | 2100.1335      | 1050.5704        | 20 |
| 14 | 1607.8136        | 804.4104        | 1590.7871      | 795.8972         | <b>1589.8030</b> | 795.4052         | T    | 2005.0600 | 1003.0337       | 1988.0335      | 994.5204         | 1987.0495      | 994.0284         | 19 |
| 15 | <b>1721.8565</b> | 861.4319        | 1704.8300      | 852.9186         | 1703.8460        | 852.4266         | N    | 1904.0124 | 952.5098        | 1886.9858      | 943.9965         | 1886.0018      | 943.5045         | 18 |
| 16 | <b>1834.9406</b> | 917.9739        | 1817.9141      | 909.4607         | 1816.9300        | 908.9687         | L    | 1789.9694 | 895.4884        | 1772.9429      | 886.9751         | 1771.9589      | 886.4831         | 17 |
| 17 | 1935.9883        | 968.4978        | 1918.9617      | 959.9845         | 1917.9777        | 959.4925         | T    | 1676.8854 | 838.9463        | 1659.8588      | <b>830.4331</b>  | 1658.8748      | 829.9410         | 16 |

|    |           |           |           |           |           |           |   |           |          |           |          |           |          |    |
|----|-----------|-----------|-----------|-----------|-----------|-----------|---|-----------|----------|-----------|----------|-----------|----------|----|
| 18 | 2033.0410 | 1017.0242 | 2016.0145 | 1008.5109 | 2015.0305 | 1008.0189 | P | 1575.8377 | 788.4225 | 1558.8112 | 779.9092 | 1557.8271 | 779.4172 | 15 |
| 19 | 2090.0625 | 1045.5349 | 2073.0360 | 1037.0216 | 2072.0519 | 1036.5296 | G | 1478.7849 | 739.8961 | 1461.7584 | 731.3828 | 1460.7744 | 730.8908 | 14 |
| 20 | 2191.1102 | 1096.0587 | 2174.0836 | 1087.5455 | 2173.0996 | 1087.0534 | T | 1421.7635 | 711.3854 | 1404.7369 | 702.8721 | 1403.7529 | 702.3801 | 13 |
| 21 | 2320.1528 | 1160.5800 | 2303.1262 | 1152.0668 | 2302.1422 | 1151.5747 | E | 1320.7158 | 660.8615 | 1303.6892 | 652.3483 | 1302.7052 | 651.8563 | 12 |
| 22 | 2483.2161 | 1242.1117 | 2466.1896 | 1233.5984 | 2465.2055 | 1233.1064 | Y | 1191.6732 | 596.3402 | 1174.6467 | 587.8270 | 1173.6626 | 587.3350 | 11 |
| 23 | 2582.2845 | 1291.6459 | 2565.2580 | 1283.1326 | 2564.2740 | 1282.6406 | V | 1028.6099 | 514.8086 | 1011.5833 | 506.2953 | 1010.5993 | 505.8033 | 10 |
| 24 | 2681.3529 | 1341.1801 | 2664.3264 | 1332.6668 | 2663.3424 | 1332.1748 | V | 929.5415  | 465.2744 | 912.5149  | 456.7611 | 911.5309  | 456.2691 | 9  |
| 25 | 2768.3850 | 1384.6961 | 2751.3584 | 1376.1828 | 2750.3744 | 1375.6908 | S | 830.4730  | 415.7402 | 813.4465  | 407.2269 | 812.4625  | 406.7349 | 8  |
| 26 | 2881.4690 | 1441.2382 | 2864.4425 | 1432.7249 | 2863.4585 | 1432.2329 | I | 743.4410  | 372.2241 | 726.4145  | 363.7109 |           |          | 7  |
| 27 | 2980.5374 | 1490.7724 | 2963.5109 | 1482.2591 | 2962.5269 | 1481.7671 | V | 630.3570  | 315.6821 | 613.3304  | 307.1688 |           |          | 6  |
| 28 | 3051.5746 | 1526.2909 | 3034.5480 | 1517.7776 | 3033.5640 | 1517.2856 | A | 531.2885  | 266.1479 | 514.2620  | 257.6346 |           |          | 5  |
| 29 | 3164.6586 | 1582.8329 | 3147.6321 | 1574.3197 | 3146.6481 | 1573.8277 | L | 460.2514  | 230.6293 | 443.2249  | 222.1161 |           |          | 4  |
| 30 | 3279.6856 | 1640.3464 | 3262.6590 | 1631.8331 | 3261.6750 | 1631.3411 | N | 347.1674  | 174.0873 | 330.1408  | 165.5740 |           |          | 3  |
| 31 | 3336.7070 | 1668.8572 | 3319.6805 | 1660.3439 | 3318.6965 | 1659.8519 | G | 232.1404  | 116.5738 | 215.1139  | 108.0606 |           |          | 2  |
| 32 |           |           |           |           |           |           | R | 175.1190  | 88.0631  | 158.0924  | 79.5498  |           |          | 1  |

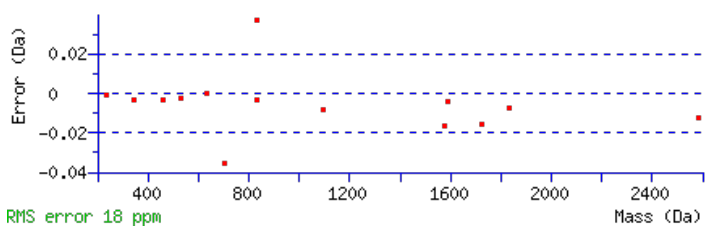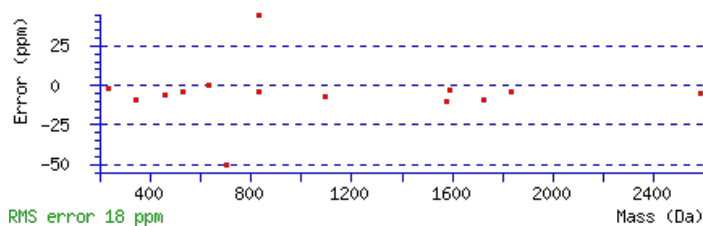

NCBI BLAST search of [EDRVPHSRNSITLTNLTPGTEYVVSIVALNGR](#)

(Parameters: blastp, nr protein database, expect=20000, no filter, PAM30)

Other BLAST [web gateways](#)

All matches to this query

| Score | Mr(calc)  | Delta  | Sequence                                         | Site Analysis              |
|-------|-----------|--------|--------------------------------------------------|----------------------------|
| 50.9  | 3509.8114 | 0.0021 | <a href="#">EDRVPHSRNSITLTNLTPGTEYVVSIVALNGR</a> | Deamidated N9, N30 79.36%  |
| 45.1  | 3509.8114 | 0.0021 | <a href="#">EDRVPHSRNSITLTNLTPGTEYVVSIVALNGR</a> | Deamidated N15, N30 20.64% |
| 31.3  | 3508.8274 | 0.9861 | <a href="#">EDRVPHSRNSITLTNLTPGTEYVVSIVALNGR</a> |                            |
| 5.1   | 3508.8274 | 0.9861 | <a href="#">EDRVPHSRNSITLTNLTPGTEYVVSIVALNGR</a> |                            |
| 1.1   | 3508.8274 | 0.9861 | <a href="#">EDRVPHSRNSITLTNLTPGTEYVVSIVALNGR</a> |                            |

Mascot: <http://www.matrixscience.com/>

# Mascot Search Results

## Peptide View

MS/MS Fragmentation of **EDRVPHSRNSITLTNLTPGTEYVVSIVALNGR**

Found in **P02751** in **uni\_human\_nr**, FINC\_HUMAN Fibronectin OS=Homo sapiens GN=FN1 PE=1 SV=4

Match to Query 16507: 3509.804920 from(702.968260,5+) intensity(106178.4531) rtinseconds(2985) scans(17854) index(13618)

Title: 130809\_HPL\_Human\_Plaque\_BR1\_TR3\_08\_Spectrum035228\_scans\_\_17854\_RTINSECONDS=2985

Data file E:\\RAW\\HumanPlaques\\imgf\\T\\1D\\T130809\_HPL\_Human\_Plaque\_BR1\_TR3\_08.mgf

Click mouse within plot area to zoom in by factor of two about that point

Or, to Da

Label all possible matches Label matches used for scoring

Show Y-axis

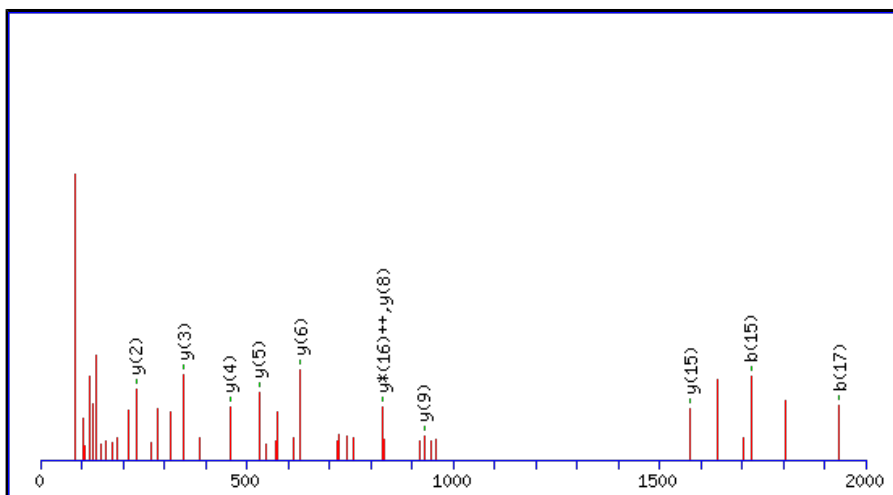

Monoisotopic mass of neutral peptide Mr(calc): 3509.8114

Fixed modifications: Carbamidomethyl (C) (apply to specified residues or termini only)

Variable modifications:

N15 : Deamidated (NQ)

N30 : Deamidated (NQ)

Ions Score: 49 Expect: 0.00088

Matches : 11/354 fragment ions using 14 most intense peaks ([help](#))

| #  | b                | b <sup>++</sup> | b <sup>*</sup> | b <sup>***</sup> | b <sup>0</sup> | b <sup>0++</sup> | Seq. | y         | y <sup>++</sup> | y <sup>*</sup> | y <sup>***</sup> | y <sup>0</sup> | y <sup>0++</sup> | #  |
|----|------------------|-----------------|----------------|------------------|----------------|------------------|------|-----------|-----------------|----------------|------------------|----------------|------------------|----|
| 1  | 130.0499         | 65.5286         |                |                  | 112.0393       | 56.5233          | E    |           |                 |                |                  |                |                  | 32 |
| 2  | 245.0768         | 123.0420        |                |                  | 227.0662       | 114.0368         | D    | 3381.7761 | 1691.3917       | 3364.7496      | 1682.8784        | 3363.7655      | 1682.3864        | 31 |
| 3  | 401.1779         | 201.0926        | 384.1514       | 192.5793         | 383.1674       | 192.0873         | R    | 3266.7492 | 1633.8782       | 3249.7226      | 1625.3649        | 3248.7386      | 1624.8729        | 30 |
| 4  | 500.2463         | 250.6268        | 483.2198       | 242.1135         | 482.2358       | 241.6215         | V    | 3110.6481 | 1555.8277       | 3093.6215      | 1547.3144        | 3092.6375      | 1546.8224        | 29 |
| 5  | 597.2991         | 299.1532        | 580.2726       | 290.6399         | 579.2885       | 290.1479         | P    | 3011.5796 | 1506.2935       | 2994.5531      | 1497.7802        | 2993.5691      | 1497.2882        | 28 |
| 6  | 734.3580         | 367.6826        | 717.3315       | 359.1694         | 716.3474       | 358.6774         | H    | 2914.5269 | 1457.7671       | 2897.5003      | 1449.2538        | 2896.5163      | 1448.7618        | 27 |
| 7  | 821.3900         | 411.1987        | 804.3635       | 402.6854         | 803.3795       | 402.1934         | S    | 2777.4680 | 1389.2376       | 2760.4414      | 1380.7243        | 2759.4574      | 1380.2323        | 26 |
| 8  | 977.4912         | 489.2492        | 960.4646       | 480.7359         | 959.4806       | 480.2439         | R    | 2690.4359 | 1345.7216       | 2673.4094      | 1337.2083        | 2672.4254      | 1336.7163        | 25 |
| 9  | 1091.5341        | 546.2707        | 1074.5075      | 537.7574         | 1073.5235      | 537.2654         | N    | 2534.3348 | 1267.6711       | 2517.3083      | 1259.1578        | 2516.3243      | 1258.6658        | 24 |
| 10 | 1178.5661        | 589.7867        | 1161.5396      | 581.2734         | 1160.5555      | 580.7814         | S    | 2420.2919 | 1210.6496       | 2403.2654      | 1202.1363        | 2402.2813      | 1201.6443        | 23 |
| 11 | 1291.6502        | 646.3287        | 1274.6236      | 637.8154         | 1273.6396      | 637.3234         | I    | 2333.2599 | 1167.1336       | 2316.2333      | 1158.6203        | 2315.2493      | 1158.1283        | 22 |
| 12 | 1392.6979        | 696.8526        | 1375.6713      | 688.3393         | 1374.6873      | 687.8473         | T    | 2220.1758 | 1110.5915       | 2203.1493      | 1102.0783        | 2202.1652      | 1101.5863        | 21 |
| 13 | 1505.7819        | 753.3946        | 1488.7554      | 744.8813         | 1487.7713      | 744.3893         | L    | 2119.1281 | 1060.0677       | 2102.1016      | 1051.5544        | 2101.1176      | 1051.0624        | 20 |
| 14 | 1606.8296        | 803.9184        | 1589.8030      | 795.4052         | 1588.8190      | 794.9132         | T    | 2006.0441 | 1003.5257       | 1989.0175      | 995.0124         | 1988.0335      | 994.5204         | 19 |
| 15 | <b>1721.8565</b> | 861.4319        | 1704.8300      | 852.9186         | 1703.8460      | 852.4266         | N    | 1904.9964 | 953.0018        | 1887.9698      | 944.4886         | 1886.9858      | 943.9965         | 18 |
| 16 | 1834.9406        | 917.9739        | 1817.9141      | 909.4607         | 1816.9300      | 908.9687         | L    | 1789.9694 | 895.4884        | 1772.9429      | 886.9751         | 1771.9589      | 886.4831         | 17 |
| 17 | <b>1935.9883</b> | 968.4978        | 1918.9617      | 959.9845         | 1917.9777      | 959.4925         | T    | 1676.8854 | 838.9463        | 1659.8588      | <b>830.4331</b>  | 1658.8748      | 829.9410         | 16 |

|    |           |           |           |           |           |           |   |           |          |           |          |           |          |    |
|----|-----------|-----------|-----------|-----------|-----------|-----------|---|-----------|----------|-----------|----------|-----------|----------|----|
| 18 | 2033.0410 | 1017.0242 | 2016.0145 | 1008.5109 | 2015.0305 | 1008.0189 | P | 1575.8377 | 788.4225 | 1558.8112 | 779.9092 | 1557.8271 | 779.4172 | 15 |
| 19 | 2090.0625 | 1045.5349 | 2073.0360 | 1037.0216 | 2072.0519 | 1036.5296 | G | 1478.7849 | 739.8961 | 1461.7584 | 731.3828 | 1460.7744 | 730.8908 | 14 |
| 20 | 2191.1102 | 1096.0587 | 2174.0836 | 1087.5455 | 2173.0996 | 1087.0534 | T | 1421.7635 | 711.3854 | 1404.7369 | 702.8721 | 1403.7529 | 702.3801 | 13 |
| 21 | 2320.1528 | 1160.5800 | 2303.1262 | 1152.0668 | 2302.1422 | 1151.5747 | E | 1320.7158 | 660.8615 | 1303.6892 | 652.3483 | 1302.7052 | 651.8563 | 12 |
| 22 | 2483.2161 | 1242.1117 | 2466.1896 | 1233.5984 | 2465.2055 | 1233.1064 | Y | 1191.6732 | 596.3402 | 1174.6467 | 587.8270 | 1173.6626 | 587.3350 | 11 |
| 23 | 2582.2845 | 1291.6459 | 2565.2580 | 1283.1326 | 2564.2740 | 1282.6406 | V | 1028.6099 | 514.8086 | 1011.5833 | 506.2953 | 1010.5993 | 505.8033 | 10 |
| 24 | 2681.3529 | 1341.1801 | 2664.3264 | 1332.6668 | 2663.3424 | 1332.1748 | V | 929.5415  | 465.2744 | 912.5149  | 456.7611 | 911.5309  | 456.2691 | 9  |
| 25 | 2768.3850 | 1384.6961 | 2751.3584 | 1376.1828 | 2750.3744 | 1375.6908 | S | 830.4730  | 415.7402 | 813.4465  | 407.2269 | 812.4625  | 406.7349 | 8  |
| 26 | 2881.4690 | 1441.2382 | 2864.4425 | 1432.7249 | 2863.4585 | 1432.2329 | I | 743.4410  | 372.2241 | 726.4145  | 363.7109 |           |          | 7  |
| 27 | 2980.5374 | 1490.7724 | 2963.5109 | 1482.2591 | 2962.5269 | 1481.7671 | V | 630.3570  | 315.6821 | 613.3304  | 307.1688 |           |          | 6  |
| 28 | 3051.5746 | 1526.2909 | 3034.5480 | 1517.7776 | 3033.5640 | 1517.2856 | A | 531.2885  | 266.1479 | 514.2620  | 257.6346 |           |          | 5  |
| 29 | 3164.6586 | 1582.8329 | 3147.6321 | 1574.3197 | 3146.6481 | 1573.8277 | L | 460.2514  | 230.6293 | 443.2249  | 222.1161 |           |          | 4  |
| 30 | 3279.6856 | 1640.3464 | 3262.6590 | 1631.8331 | 3261.6750 | 1631.3411 | N | 347.1674  | 174.0873 | 330.1408  | 165.5740 |           |          | 3  |
| 31 | 3336.7070 | 1668.8572 | 3319.6805 | 1660.3439 | 3318.6965 | 1659.8519 | G | 232.1404  | 116.5738 | 215.1139  | 108.0606 |           |          | 2  |
| 32 |           |           |           |           |           |           | R | 175.1190  | 88.0631  | 158.0924  | 79.5498  |           |          | 1  |

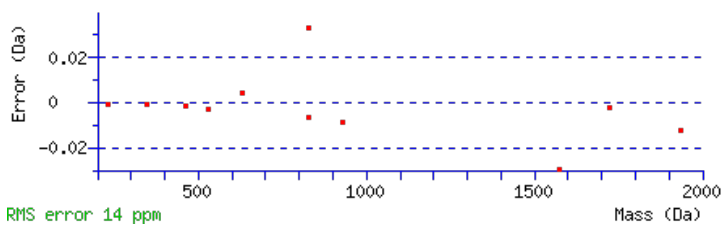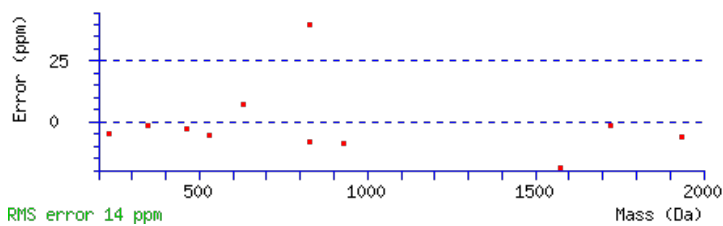

NCBI BLAST search of [EDRVPHSRNSITLTNLTPGTEYVVSIVALNGR](#)

(Parameters: blastp, nr protein database, expect=20000, no filter, PAM30)

Other BLAST [web gateways](#)

All matches to this query

| Score | Mr(calc)  | Delta   | Sequence                                         | Site Analysis              |
|-------|-----------|---------|--------------------------------------------------|----------------------------|
| 48.7  | 3509.8114 | -0.0065 | <a href="#">EDRVPHSRNSITLTNLTPGTEYVVSIVALNGR</a> | Deamidated N15, N30 35.79% |
| 48.7  | 3509.8114 | -0.0065 | <a href="#">EDRVPHSRNSITLTNLTPGTEYVVSIVALNGR</a> | Deamidated N9, N30 35.79%  |

Mascot: <http://www.matrixscience.com/>

# Mascot Search Results

## Peptide View

MS/MS Fragmentation of **GNLLQCICTGNGR**

Found in **P02751** in **uni\_human\_nr**, FINC\_HUMAN Fibronectin OS=Homo sapiens GN=FN1 PE=1 SV=4

Match to Query 2992: 1463.652068 from(732.833310,2+) intensity(122796.8984) rtinseconds(2314) scans(12772) index(9512)

Title: 130806\_HPL\_Human\_Plaque\_BR2\_TR2\_13\_Spectrum030145\_scans\_\_12772\_RTINSECONDS=2314

Data file E:\RAW\HumanPlaques\mgf\T\1D\T130806\_HPL\_Human\_Plaque\_BR2\_TR2\_13.mgf

Click mouse within plot area to zoom in by factor of two about that point

Or,  to  Da

Label all possible matches  Label matches used for scoring

Show Y-axis

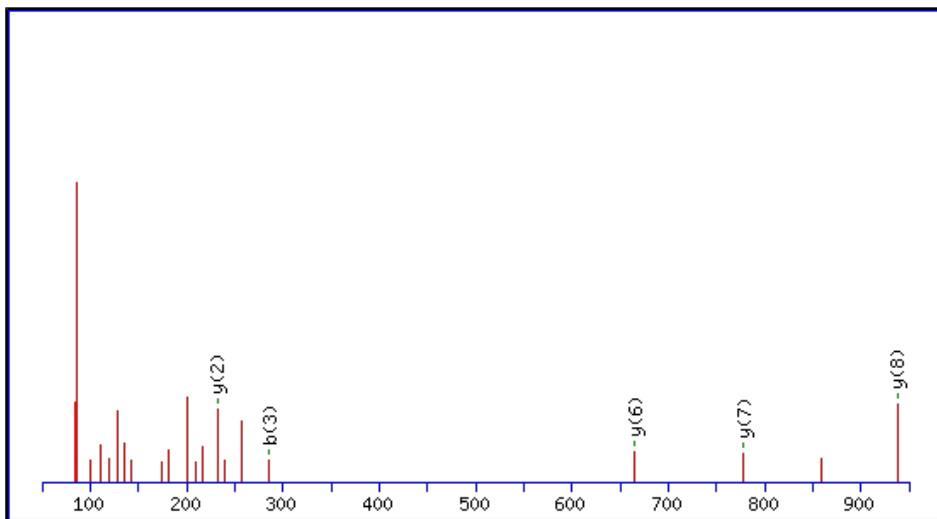

Monoisotopic mass of neutral peptide Mr(calc): 1463.6497

Fixed modifications: Carbamidomethyl (C) (apply to specified residues or termini only)

Variable modifications:

N2 : Deamidated (NQ)

N11 : Deamidated (NQ)

Ions Score: 18 Expect: 0.53

Matches : 5/118 fragment ions using 9 most intense peaks ([help](#))

| #  | b               | b <sup>++</sup> | b <sup>*</sup> | b <sup>*++</sup> | b <sup>0</sup> | b <sup>0++</sup> | Seq. | y               | y <sup>++</sup> | y <sup>*</sup> | y <sup>*++</sup> | y <sup>0</sup> | y <sup>0++</sup> | #  |
|----|-----------------|-----------------|----------------|------------------|----------------|------------------|------|-----------------|-----------------|----------------|------------------|----------------|------------------|----|
| 1  | 58.0287         | 29.5180         |                |                  |                |                  | G    |                 |                 |                |                  |                |                  | 13 |
| 2  | 173.0557        | 87.0315         | 156.0291       | 78.5182          |                |                  | N    | 1407.6355       | 704.3214        | 1390.6090      | 695.8081         | 1389.6249      | 695.3161         | 12 |
| 3  | <b>286.1397</b> | 143.5735        | 269.1132       | 135.0602         |                |                  | L    | 1292.6086       | 646.8079        | 1275.5820      | 638.2946         | 1274.5980      | 637.8026         | 11 |
| 4  | 399.2238        | 200.1155        | 382.1973       | 191.6023         |                |                  | L    | 1179.5245       | 590.2659        | 1162.4980      | 581.7526         | 1161.5139      | 581.2606         | 10 |
| 5  | 527.2824        | 264.1448        | 510.2558       | 255.6316         |                |                  | Q    | 1066.4404       | 533.7239        | 1049.4139      | 525.2106         | 1048.4299      | 524.7186         | 9  |
| 6  | 687.3130        | 344.1602        | 670.2865       | 335.6469         |                |                  | C    | <b>938.3819</b> | 469.6946        | 921.3553       | 461.1813         | 920.3713       | 460.6893         | 8  |
| 7  | 800.3971        | 400.7022        | 783.3706       | 392.1889         |                |                  | I    | <b>778.3512</b> | 389.6792        | 761.3247       | 381.1660         | 760.3406       | 380.6740         | 7  |
| 8  | 960.4278        | 480.7175        | 943.4012       | 472.2042         |                |                  | C    | <b>665.2672</b> | 333.1372        | 648.2406       | 324.6239         | 647.2566       | 324.1319         | 6  |
| 9  | 1061.4754       | 531.2414        | 1044.4489      | 522.7281         | 1043.4649      | 522.2361         | T    | 505.2365        | 253.1219        | 488.2100       | 244.6086         | 487.2259       | 244.1166         | 5  |
| 10 | 1118.4969       | 559.7521        | 1101.4703      | 551.2388         | 1100.4863      | 550.7468         | G    | 404.1888        | 202.5980        | 387.1623       | 194.0848         |                |                  | 4  |
| 11 | 1233.5238       | 617.2656        | 1216.4973      | 608.7523         | 1215.5133      | 608.2603         | N    | 347.1674        | 174.0873        | 330.1408       | 165.5740         |                |                  | 3  |
| 12 | 1290.5453       | 645.7763        | 1273.5188      | 637.2630         | 1272.5347      | 636.7710         | G    | <b>232.1404</b> | 116.5738        | 215.1139       | 108.0606         |                |                  | 2  |
| 13 |                 |                 |                |                  |                |                  | R    | 175.1190        | 88.0631         | 158.0924       | 79.5498          |                |                  | 1  |



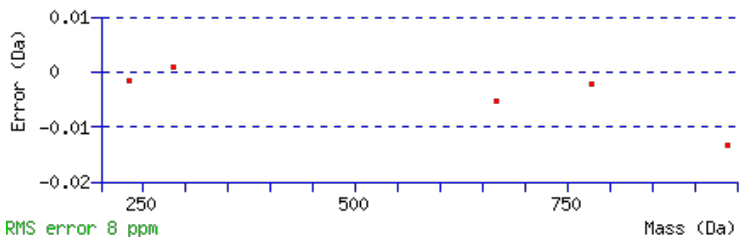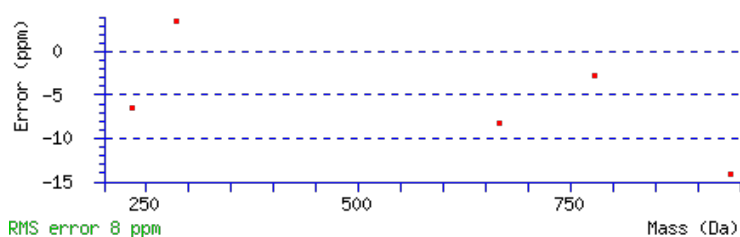

NCBI BLAST search of [GNLLQCICTGNGR](#)

(Parameters: blastp, nr protein database, expect=20000, no filter, PAM30)

Other BLAST [web gateways](#)

**All matches to this query**

| Score | Mr(calc)  | Delta  | Sequence                      |
|-------|-----------|--------|-------------------------------|
| 18.3  | 1463.6497 | 0.0024 | <a href="#">GNLLQCICTGNGR</a> |
| 15.3  | 1463.6497 | 0.0024 | <a href="#">GNLLQCICTGNGR</a> |

Mascot: <http://www.matrixscience.com/>

# Mascot Search Results

## Peptide View

MS/MS Fragmentation of **GNLLQCICTGNGR**

Found in **P02751** in **uni\_human\_nr**, FINC\_HUMAN Fibronectin OS=Homo sapiens GN=FN1 PE=1 SV=4

Match to Query 3399: 1462.664888 from(732.339720,2+) intensity(3667816.5000) rtinseconds(2081) scans(11852) index(8779)

Title: 130806\_HPL\_Human\_Plaque\_BR1\_TR2\_07\_Spectrum030750\_scans\_\_11852\_RTINSECONDS=2081

Data file E:\RAW\HumanPlaques\mgf\T\1D\T130806\_HPL\_Human\_Plaque\_BR1\_TR2\_07.mgf

Click mouse within plot area to zoom in by factor of two about that point

Or,  to  Da

Label all possible matches  Label matches used for scoring

Show Y-axis

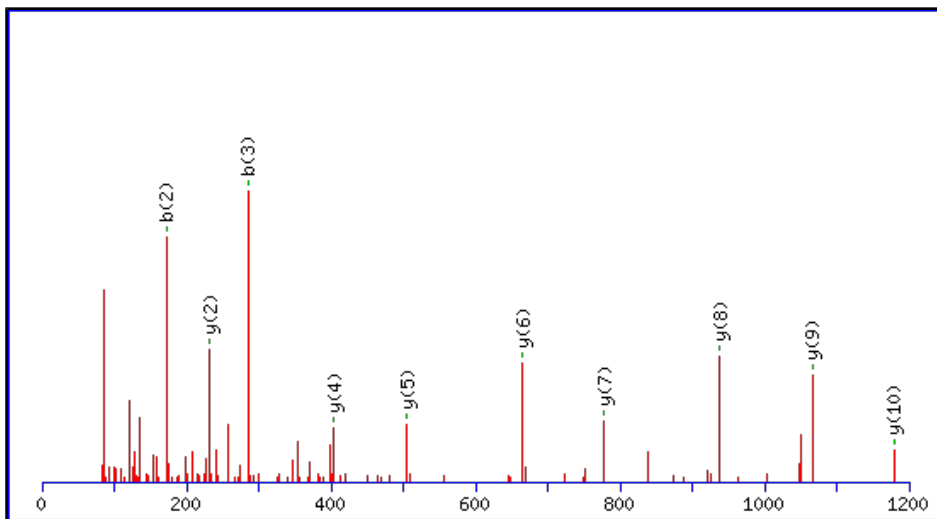

Monoisotopic mass of neutral peptide **Mr(calc)**: 1462.6657

**Fixed modifications:** Carbamidomethyl (C) (apply to specified residues or termini only)

**Variable modifications:**

N11 : Deamidated (NQ)

**Ions Score:** 78 **Expect:** 6.5e-007

**Matches :** 10/118 fragment ions using 11 most intense peaks ([help](#))

| #  | b               | b <sup>++</sup> | b <sup>*</sup> | b <sup>*++</sup> | b <sup>0</sup> | b <sup>0++</sup> | Seq. | y                | y <sup>++</sup> | y <sup>*</sup> | y <sup>*++</sup> | y <sup>0</sup> | y <sup>0++</sup> | #  |
|----|-----------------|-----------------|----------------|------------------|----------------|------------------|------|------------------|-----------------|----------------|------------------|----------------|------------------|----|
| 1  | 58.0287         | 29.5180         |                |                  |                |                  | G    |                  |                 |                |                  |                |                  | 13 |
| 2  | <b>172.0717</b> | 86.5395         | 155.0451       | 78.0262          |                |                  | N    | 1406.6515        | 703.8294        | 1389.6249      | 695.3161         | 1388.6409      | 694.8241         | 12 |
| 3  | <b>285.1557</b> | 143.0815        | 268.1292       | 134.5682         |                |                  | L    | 1292.6086        | 646.8079        | 1275.5820      | 638.2946         | 1274.5980      | 637.8026         | 11 |
| 4  | 398.2398        | 199.6235        | 381.2132       | 191.1103         |                |                  | L    | <b>1179.5245</b> | 590.2659        | 1162.4980      | 581.7526         | 1161.5139      | 581.2606         | 10 |
| 5  | 526.2984        | 263.6528        | 509.2718       | 255.1396         |                |                  | Q    | <b>1066.4404</b> | 533.7239        | 1049.4139      | 525.2106         | 1048.4299      | 524.7186         | 9  |
| 6  | 686.3290        | 343.6681        | 669.3025       | 335.1549         |                |                  | C    | <b>938.3819</b>  | 469.6946        | 921.3553       | 461.1813         | 920.3713       | 460.6893         | 8  |
| 7  | 799.4131        | 400.2102        | 782.3865       | 391.6969         |                |                  | I    | <b>778.3512</b>  | 389.6792        | 761.3247       | 381.1660         | 760.3406       | 380.6740         | 7  |
| 8  | 959.4437        | 480.2255        | 942.4172       | 471.7122         |                |                  | C    | <b>665.2672</b>  | 333.1372        | 648.2406       | 324.6239         | 647.2566       | 324.1319         | 6  |
| 9  | 1060.4914       | 530.7493        | 1043.4649      | 522.2361         | 1042.4808      | 521.7441         | T    | <b>505.2365</b>  | 253.1219        | 488.2100       | 244.6086         | 487.2259       | 244.1166         | 5  |
| 10 | 1117.5129       | 559.2601        | 1100.4863      | 550.7468         | 1099.5023      | 550.2548         | G    | <b>404.1888</b>  | 202.5980        | 387.1623       | 194.0848         |                |                  | 4  |
| 11 | 1232.5398       | 616.7735        | 1215.5133      | 608.2603         | 1214.5293      | 607.7683         | N    | 347.1674         | 174.0873        | 330.1408       | 165.5740         |                |                  | 3  |
| 12 | 1289.5613       | 645.2843        | 1272.5347      | 636.7710         | 1271.5507      | 636.2790         | G    | <b>232.1404</b>  | 116.5738        | 215.1139       | 108.0606         |                |                  | 2  |
| 13 |                 |                 |                |                  |                |                  | R    | 175.1190         | 88.0631         | 158.0924       | 79.5498          |                |                  | 1  |

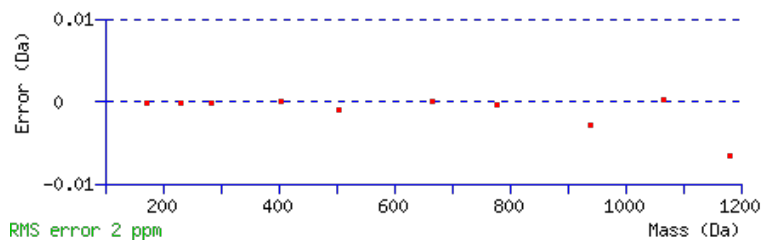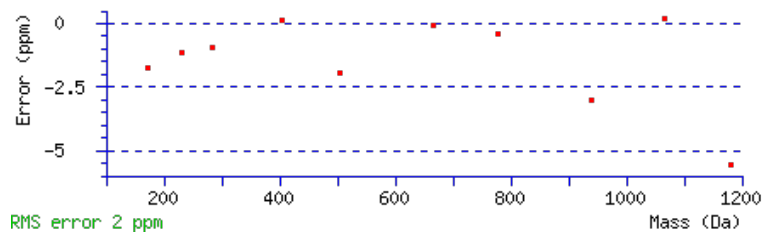

NCBI BLAST search of [GNLLQCICTGNGR](#)

(Parameters: blastp, nr protein database, expect=20000, no filter, PAM30)

Other BLAST [web gateways](#)

**All matches to this query**

| Score | Mr(calc)  | Delta   | Sequence                      | Site Analysis          |
|-------|-----------|---------|-------------------------------|------------------------|
| 78.3  | 1462.6657 | -0.0008 | <a href="#">GNLLQCICTGNGR</a> | Deamidated N11 100.00% |
| 11.1  | 1462.6657 | -0.0008 | <a href="#">GNLLQCICTGNGR</a> | Deamidated Q5 0.00%    |

Mascot: <http://www.matrixscience.com/>

# Mascot Search Results

## Peptide View

MS/MS Fragmentation of **GNLLQCICTGNGR**

Found in **P02751** in **uni\_human\_nr**, FINC\_HUMAN Fibronectin OS=Homo sapiens GN=FN1 PE=1 SV=4

Match to Query 4104: 1461.679288 from(731.846920,2+) intensity(225957232.0000) rtinseconds(1757) scans(9968) index(7285)

Title: 130801\_HPL\_Human\_Plaque\_BR2\_TR1\_02\_Spectrum031440\_scans\_9968\_RTINSECONDS=1757

Data file E:\RAW\HumanPlaques\mgf\T\1D\T130801\_HPL\_Human\_Plaque\_BR2\_TR1\_02.mgf

Click mouse within plot area to zoom in by factor of two about that point

Or,  to  Da

Label all possible matches  Label matches used for scoring

Show Y-axis

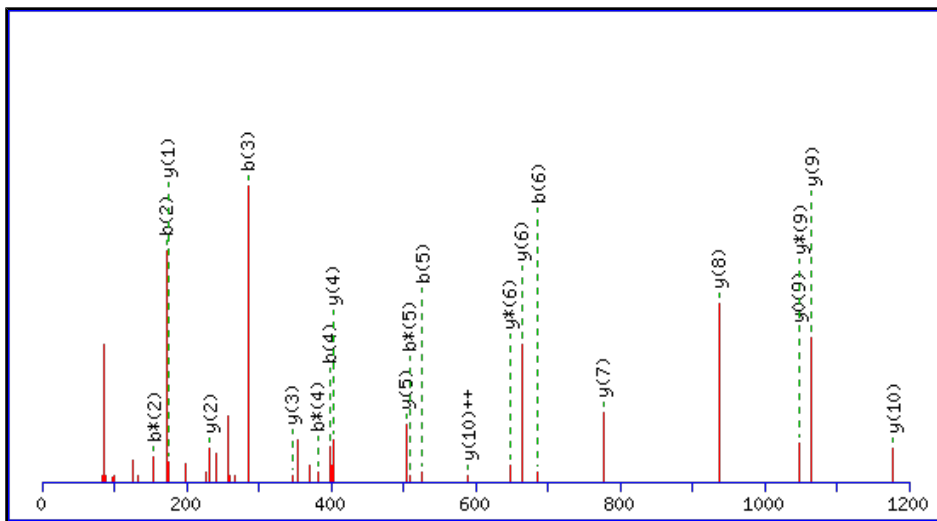

Monoisotopic mass of neutral peptide **Mr(calc)**: 1461.6817

**Fixed modifications**: Carbamidomethyl (C) (apply to specified residues or termini only)

**Ions Score**: 84 **Expect**: 2.2e-007

**Matches** : 22/118 fragment ions using 33 most intense peaks ([help](#))

| #  | b               | b <sup>++</sup> | b*              | b <sup>*++</sup> | b <sup>0</sup> | b <sup>0++</sup> | Seq. | y                | y <sup>++</sup> | y*               | y <sup>*++</sup> | y <sup>0</sup>   | y <sup>0++</sup> | #  |
|----|-----------------|-----------------|-----------------|------------------|----------------|------------------|------|------------------|-----------------|------------------|------------------|------------------|------------------|----|
| 1  | 58.0287         | 29.5180         |                 |                  |                |                  | G    |                  |                 |                  |                  |                  |                  | 13 |
| 2  | <b>172.0717</b> | 86.5395         | <b>155.0451</b> | 78.0262          |                |                  | N    | 1405.6675        | 703.3374        | 1388.6409        | 694.8241         | 1387.6569        | 694.3321         | 12 |
| 3  | <b>285.1557</b> | 143.0815        | 268.1292        | 134.5682         |                |                  | L    | 1291.6246        | 646.3159        | 1274.5980        | 637.8026         | 1273.6140        | 637.3106         | 11 |
| 4  | <b>398.2398</b> | 199.6235        | <b>381.2132</b> | 191.1103         |                |                  | L    | <b>1178.5405</b> | <b>589.7739</b> | 1161.5139        | 581.2606         | 1160.5299        | 580.7686         | 10 |
| 5  | <b>526.2984</b> | 263.6528        | <b>509.2718</b> | 255.1396         |                |                  | Q    | <b>1065.4564</b> | 533.2319        | <b>1048.4299</b> | 524.7186         | <b>1047.4459</b> | 524.2266         | 9  |
| 6  | <b>686.3290</b> | 343.6681        | 669.3025        | 335.1549         |                |                  | C    | <b>937.3978</b>  | 469.2026        | 920.3713         | 460.6893         | 919.3873         | 460.1973         | 8  |
| 7  | 799.4131        | 400.2102        | 782.3865        | 391.6969         |                |                  | I    | <b>777.3672</b>  | 389.1872        | 760.3406         | 380.6740         | 759.3566         | 380.1820         | 7  |
| 8  | 959.4437        | 480.2255        | 942.4172        | 471.7122         |                |                  | C    | <b>664.2831</b>  | 332.6452        | <b>647.2566</b>  | 324.1319         | 646.2726         | 323.6399         | 6  |
| 9  | 1060.4914       | 530.7493        | 1043.4649       | 522.2361         | 1042.4808      | 521.7441         | T    | <b>504.2525</b>  | 252.6299        | 487.2259         | 244.1166         | 486.2419         | 243.6246         | 5  |
| 10 | 1117.5129       | 559.2601        | 1100.4863       | 550.7468         | 1099.5023      | 550.2548         | G    | <b>403.2048</b>  | 202.1060        | 386.1783         | 193.5928         |                  |                  | 4  |
| 11 | 1231.5558       | 616.2815        | 1214.5293       | 607.7683         | 1213.5452      | 607.2763         | N    | <b>346.1833</b>  | 173.5953        | 329.1568         | 165.0820         |                  |                  | 3  |
| 12 | 1288.5773       | 644.7923        | 1271.5507       | 636.2790         | 1270.5667      | 635.7870         | G    | <b>232.1404</b>  | 116.5738        | 215.1139         | 108.0606         |                  |                  | 2  |
| 13 |                 |                 |                 |                  |                |                  | R    | <b>175.1190</b>  | 88.0631         | 158.0924         | 79.5498          |                  |                  | 1  |

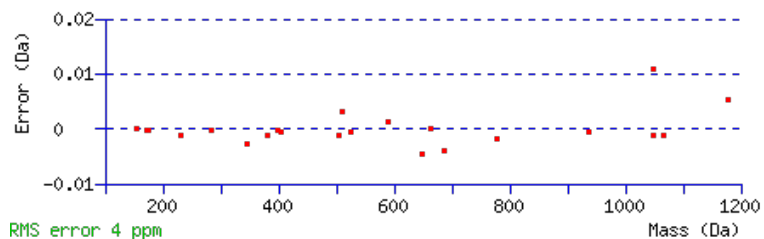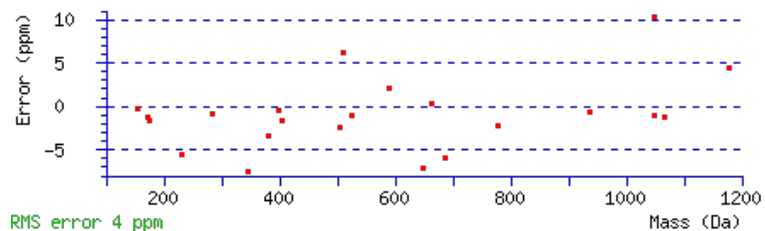

NCBI BLAST search of [GNLLQCICTGNGR](#)

(Parameters: blastp, nr protein database, expect=20000, no filter, PAM30)

Other BLAST [web gateways](#)

**All matches to this query**

| Score | Mr(calc)  | Delta   | Sequence                      |
|-------|-----------|---------|-------------------------------|
| 83.9  | 1461.6817 | -0.0024 | <a href="#">GNLLQCICTGNGR</a> |
| 11.0  | 1461.6783 | 0.0010  | <a href="#">QRLQMYNSQHR</a>   |
| 0.8   | 1461.6735 | 0.0057  | <a href="#">NGIPYLNQEEER</a>  |
| 0.8   | 1461.6735 | 0.0057  | <a href="#">NGIPYLNQEEER</a>  |
| 0.5   | 1461.6857 | -0.0064 | <a href="#">QRICSETTEMR</a>   |
| 0.5   | 1461.6783 | 0.0010  | <a href="#">QRLQMYNSQHR</a>   |
| 0.5   | 1461.6783 | 0.0010  | <a href="#">QRLQMYNSQHR</a>   |

Mascot: <http://www.matrixscience.com/>

# Mascot Search Results

## Peptide View

MS/MS Fragmentation of **GNLLQCICTGNGR**

Found in **P02751** in **uni\_human\_nr**, FINC\_HUMAN Fibronectin OS=Homo sapiens GN=FN1 PE=1 SV=4

Match to Query 4157: 1461.683232 from(488.235020,3+) intensity(7707136.5000) rtinseconds(1758) scans(10166) index(7551)

Title: 130801\_HPL\_Human\_Plaque\_BR1\_TR1\_02\_Spectrum031558\_scans\_\_10166\_RTINSECONDS=1758

Data file E:\RAW\HumanPlaques\mgf\T\1D\T130801\_HPL\_Human\_Plaque\_BR1\_TR1\_02.mgf

Click mouse within plot area to zoom in by factor of two about that point

Or,  to  Da

Label all possible matches  Label matches used for scoring

Show Y-axis

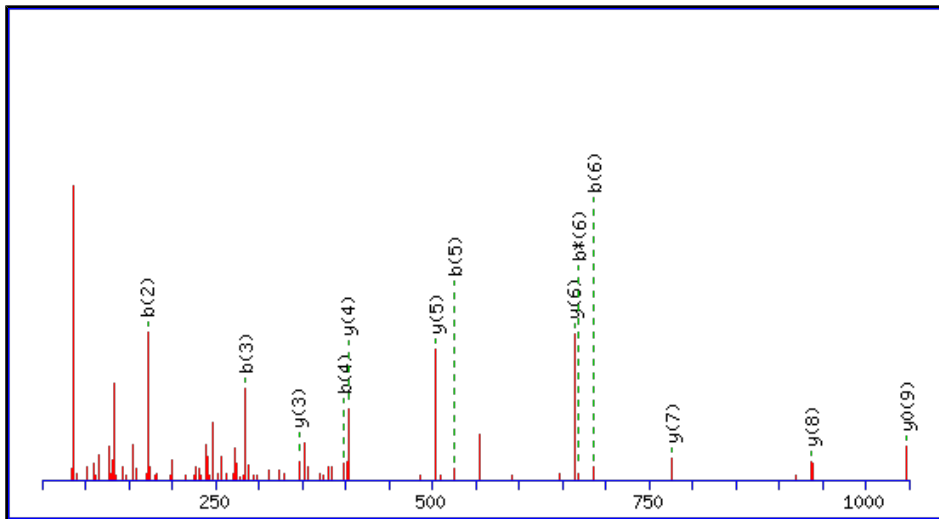

Monoisotopic mass of neutral peptide **Mr(calc)**: 1461.6817

Fixed modifications: Carbamidomethyl (C) (apply to specified residues or termini only)

Ions Score: 44 Expect: 0.0021

Matches : 13/118 fragment ions using 24 most intense peaks ([help](#))

| #  | b               | b <sup>++</sup> | b <sup>*</sup>  | b <sup>*++</sup> | b <sup>0</sup> | b <sup>0++</sup> | Seq. | y               | y <sup>++</sup> | y <sup>*</sup> | y <sup>*++</sup> | y <sup>0</sup>   | y <sup>0++</sup> | #  |
|----|-----------------|-----------------|-----------------|------------------|----------------|------------------|------|-----------------|-----------------|----------------|------------------|------------------|------------------|----|
| 1  | 58.0287         | 29.5180         |                 |                  |                |                  | G    |                 |                 |                |                  |                  |                  | 13 |
| 2  | <b>172.0717</b> | 86.5395         | 155.0451        | 78.0262          |                |                  | N    | 1405.6675       | 703.3374        | 1388.6409      | 694.8241         | 1387.6569        | 694.3321         | 12 |
| 3  | <b>285.1557</b> | 143.0815        | 268.1292        | 134.5682         |                |                  | L    | 1291.6246       | 646.3159        | 1274.5980      | 637.8026         | 1273.6140        | 637.3106         | 11 |
| 4  | <b>398.2398</b> | 199.6235        | 381.2132        | 191.1103         |                |                  | L    | 1178.5405       | 589.7739        | 1161.5139      | 581.2606         | 1160.5299        | 580.7686         | 10 |
| 5  | <b>526.2984</b> | 263.6528        | 509.2718        | 255.1396         |                |                  | Q    | 1065.4564       | 533.2319        | 1048.4299      | 524.7186         | <b>1047.4459</b> | 524.2266         | 9  |
| 6  | <b>686.3290</b> | 343.6681        | <b>669.3025</b> | 335.1549         |                |                  | C    | <b>937.3978</b> | 469.2026        | 920.3713       | 460.6893         | 919.3873         | 460.1973         | 8  |
| 7  | 799.4131        | 400.2102        | 782.3865        | 391.6969         |                |                  | I    | <b>777.3672</b> | 389.1872        | 760.3406       | 380.6740         | 759.3566         | 380.1820         | 7  |
| 8  | 959.4437        | 480.2255        | 942.4172        | 471.7122         |                |                  | C    | <b>664.2831</b> | 332.6452        | 647.2566       | 324.1319         | 646.2726         | 323.6399         | 6  |
| 9  | 1060.4914       | 530.7493        | 1043.4649       | 522.2361         | 1042.4808      | 521.7441         | T    | <b>504.2525</b> | 252.6299        | 487.2259       | 244.1166         | 486.2419         | 243.6246         | 5  |
| 10 | 1117.5129       | 559.2601        | 1100.4863       | 550.7468         | 1099.5023      | 550.2548         | G    | <b>403.2048</b> | 202.1060        | 386.1783       | 193.5928         |                  |                  | 4  |
| 11 | 1231.5558       | 616.2815        | 1214.5293       | 607.7683         | 1213.5452      | 607.2763         | N    | <b>346.1833</b> | 173.5953        | 329.1568       | 165.0820         |                  |                  | 3  |
| 12 | 1288.5773       | 644.7923        | 1271.5507       | 636.2790         | 1270.5667      | 635.7870         | G    | 232.1404        | 116.5738        | 215.1139       | 108.0606         |                  |                  | 2  |
| 13 |                 |                 |                 |                  |                |                  | R    | 175.1190        | 88.0631         | 158.0924       | 79.5498          |                  |                  | 1  |

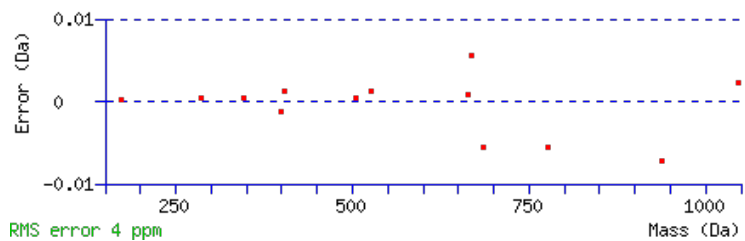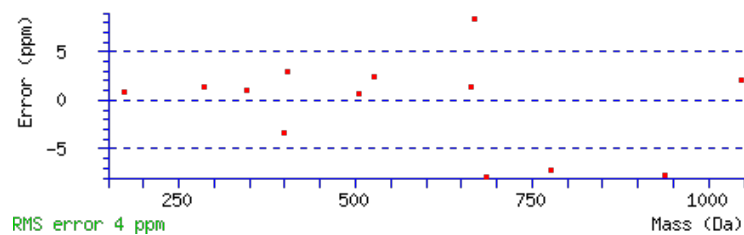

NCBI BLAST search of [GNLLQCICTGNGR](#)

(Parameters: blastp, nr protein database, expect=20000, no filter, PAM30)

Other BLAST [web gateways](#)

**All matches to this query**

| Score | Mr(calc)  | Delta  | Sequence                      |
|-------|-----------|--------|-------------------------------|
| 44.5  | 1461.6817 | 0.0016 | <a href="#">GNLLQCICTGNGR</a> |

Mascot: <http://www.matrixscience.com/>

# Mascot Search Results

## Peptide View

MS/MS Fragmentation of **GNLLQCICTGNRGEWK**

Found in **P02751** in **uni\_human\_nr**, FINC\_HUMAN Fibronectin OS=Homo sapiens GN=FN1 PE=1 SV=4

Match to Query 7478: 1963.888152 from(655.636660,3+) intensity(570374.1875) rtinseconds(2474) scans(14361) index(11049)

Title: 130809\_HPL\_Human\_Plaque\_BR2\_TR3\_09\_Spectrum032376\_scans\_\_14361\_RTINSECONDS=2474

Data file E:\RAW\HumanPlaques\mgf\T\1D\T130809\_HPL\_Human\_Plaque\_BR2\_TR3\_09.mgf

Click mouse within plot area to zoom in by factor of two about that point

Or,  to  Da

Label all possible matches  Label matches used for scoring

Show Y-axis

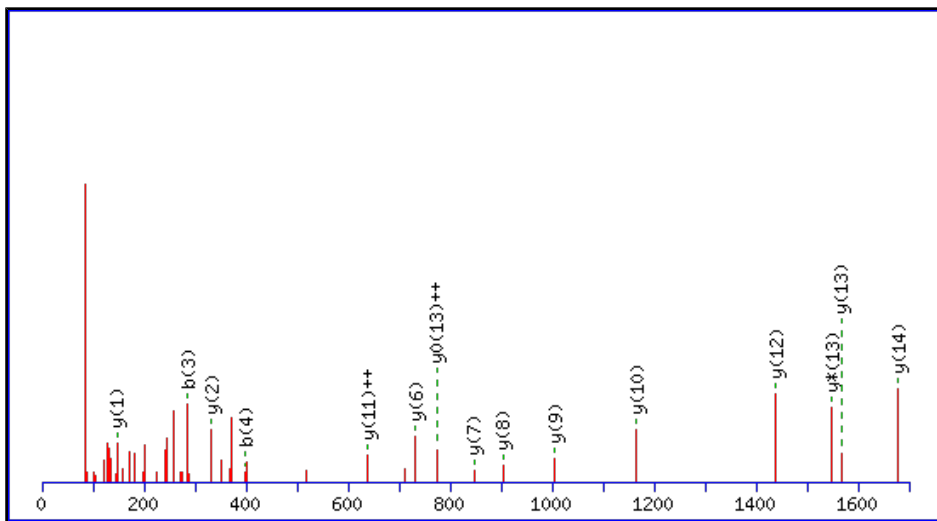

**Monoisotopic mass of neutral peptide Mr(calc):** 1963.8880

**Fixed modifications:** Carbamidomethyl (C) (apply to specified residues or termini only)

**Variable modifications:**

N2 : Deamidated (NQ)

N11 : Deamidated (NQ)

**Ions Score:** 67 **Expect:** 9.7e-006

**Matches :** 15/170 fragment ions using 27 most intense peaks ([help](#))

| #  | b               | b <sup>++</sup> | b <sup>*</sup> | b <sup>*++</sup> | b <sup>0</sup> | b <sup>0++</sup> | Seq. | y                | y <sup>++</sup> | y <sup>*</sup>   | y <sup>*++</sup> | y <sup>0</sup> | y <sup>0++</sup> | #  |
|----|-----------------|-----------------|----------------|------------------|----------------|------------------|------|------------------|-----------------|------------------|------------------|----------------|------------------|----|
| 1  | 58.0287         | 29.5180         |                |                  |                |                  | G    |                  |                 |                  |                  |                |                  | 17 |
| 2  | 173.0557        | 87.0315         | 156.0291       | 78.5182          |                |                  | N    | 1907.8738        | 954.4406        | 1890.8473        | 945.9273         | 1889.8633      | 945.4353         | 16 |
| 3  | <b>286.1397</b> | 143.5735        | 269.1132       | 135.0602         |                |                  | L    | 1792.8469        | 896.9271        | 1775.8204        | 888.4138         | 1774.8363      | 887.9218         | 15 |
| 4  | <b>399.2238</b> | 200.1155        | 382.1973       | 191.6023         |                |                  | L    | <b>1679.7628</b> | 840.3851        | 1662.7363        | 831.8718         | 1661.7523      | 831.3798         | 14 |
| 5  | 527.2824        | 264.1448        | 510.2558       | 255.6316         |                |                  | Q    | <b>1566.6788</b> | 783.8430        | <b>1549.6522</b> | 775.3298         | 1548.6682      | <b>774.8377</b>  | 13 |
| 6  | 687.3130        | 344.1602        | 670.2865       | 335.6469         |                |                  | C    | <b>1438.6202</b> | 719.8137        | 1421.5936        | 711.3005         | 1420.6096      | 710.8085         | 12 |
| 7  | 800.3971        | 400.7022        | 783.3706       | 392.1889         |                |                  | I    | 1278.5895        | <b>639.7984</b> | 1261.5630        | 631.2851         | 1260.5790      | 630.7931         | 11 |
| 8  | 960.4278        | 480.7175        | 943.4012       | 472.2042         |                |                  | C    | <b>1165.5055</b> | 583.2564        | 1148.4789        | 574.7431         | 1147.4949      | 574.2511         | 10 |
| 9  | 1061.4754       | 531.2414        | 1044.4489      | 522.7281         | 1043.4649      | 522.2361         | T    | <b>1005.4748</b> | 503.2411        | 988.4483         | 494.7278         | 987.4643       | 494.2358         | 9  |
| 10 | 1118.4969       | 559.7521        | 1101.4703      | 551.2388         | 1100.4863      | 550.7468         | G    | <b>904.4272</b>  | 452.7172        | 887.4006         | 444.2039         | 886.4166       | 443.7119         | 8  |
| 11 | 1233.5238       | 617.2656        | 1216.4973      | 608.7523         | 1215.5133      | 608.2603         | N    | <b>847.4057</b>  | 424.2065        | 830.3791         | 415.6932         | 829.3951       | 415.2012         | 7  |
| 12 | 1290.5453       | 645.7763        | 1273.5188      | 637.2630         | 1272.5347      | 636.7710         | G    | <b>732.3787</b>  | 366.6930        | 715.3522         | 358.1797         | 714.3682       | 357.6877         | 6  |
| 13 | 1446.6464       | 723.8268        | 1429.6199      | 715.3136         | 1428.6358      | 714.8216         | R    | 675.3573         | 338.1823        | 658.3307         | 329.6690         | 657.3467       | 329.1770         | 5  |
| 14 | 1503.6679       | 752.3376        | 1486.6413      | 743.8243         | 1485.6573      | 743.3323         | G    | 519.2562         | 260.1317        | 502.2296         | 251.6185         | 501.2456       | 251.1264         | 4  |
| 15 | 1632.7105       | 816.8589        | 1615.6839      | 808.3456         | 1614.6999      | 807.8536         | E    | 462.2347         | 231.6210        | 445.2082         | 223.1077         | 444.2241       | 222.6157         | 3  |



|    |           |          |           |          |           |          |   |          |          |          |          |  |  |   |
|----|-----------|----------|-----------|----------|-----------|----------|---|----------|----------|----------|----------|--|--|---|
| 16 | 1818.7898 | 909.8985 | 1801.7632 | 901.3853 | 1800.7792 | 900.8932 | W | 333.1921 | 167.0997 | 316.1656 | 158.5864 |  |  | 2 |
| 17 |           |          |           |          |           |          | K | 147.1128 | 74.0600  | 130.0863 | 65.5468  |  |  | 1 |

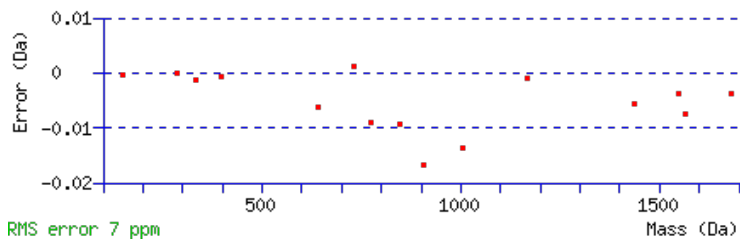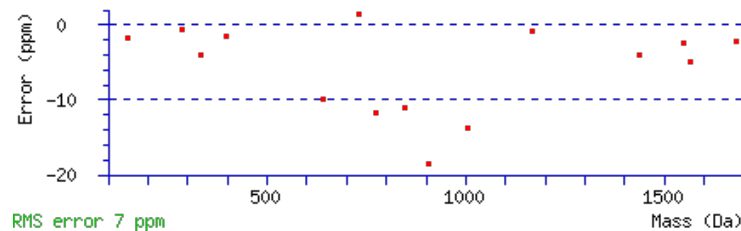

NCBI BLAST search of [GNLLQCICTGNRGEWK](#)

(Parameters: blastp, nr protein database, expect=20000, no filter, PAM30)

Other BLAST [web\\_gateways](#)

All matches to this query

| Score | Mr(calc)  | Delta  | Sequence                         | Site Analysis             |
|-------|-----------|--------|----------------------------------|---------------------------|
| 66.8  | 1963.8880 | 0.0001 | <a href="#">GNLLQCICTGNRGEWK</a> | Deamidated N2, N11 99.93% |
| 35.0  | 1963.8880 | 0.0001 | <a href="#">GNLLQCICTGNRGEWK</a> | Deamidated Q5, N11 0.07%  |
| 11.8  | 1963.8880 | 0.0001 | <a href="#">GNLLQCICTGNRGEWK</a> | Deamidated N2, Q5 0.00%   |

Mascot: <http://www.matrixscience.com/>

# Mascot Search Results

## Peptide View

MS/MS Fragmentation of **GNLLQCICTGNGRGEWK**

Found in **P02751** in **uni\_human\_nr**, FINC\_HUMAN Fibronectin OS=Homo sapiens GN=FN1 PE=1 SV=4

Match to Query 8061: 1964.885142 from(655.968990,3+) intensity(593385.1250) rtinseconds(2423) scans(14099) index(10734)

Title: 130806\_HPL\_Human\_Plaque\_BR2\_TR2\_07\_Spectrum032410\_scans\_\_14099\_RTINSECONDS=2423

Data file E:\RAW\HumanPlaques\mgf\T\1D\T130806\_HPL\_Human\_Plaque\_BR2\_TR2\_07.mgf

Click mouse within plot area to zoom in by factor of two about that point

Or,  to  Da

Label all possible matches  Label matches used for scoring

Show Y-axis

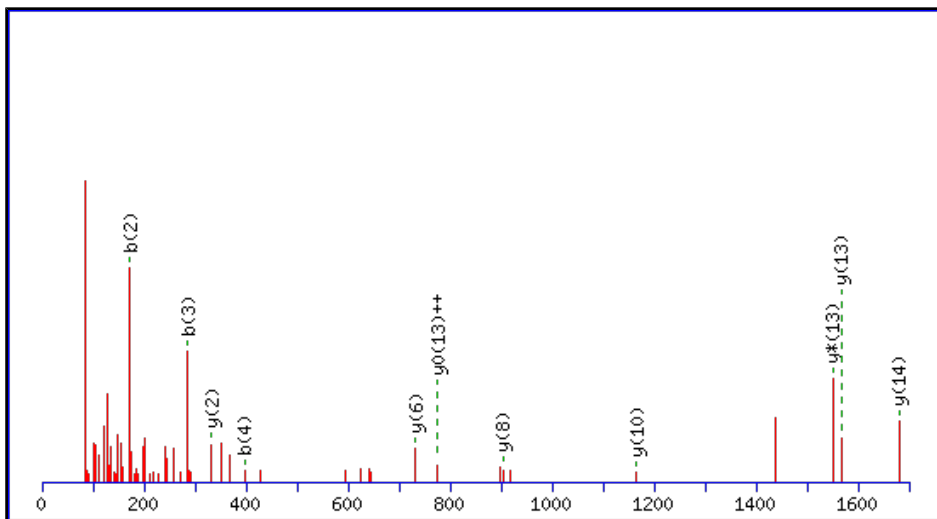

Monoisotopic mass of neutral peptide **Mr(calc):** 1963.8880

**Fixed modifications:** Carbamidomethyl (C) (apply to specified residues or termini only)

**Variable modifications:**

Q5 : Deamidated (NQ)

N11 : Deamidated (NQ)

**Ions Score:** 24 **Expect:** 0.17

**Matches :** 11/170 fragment ions using 24 most intense peaks ([help](#))

| #  | b               | b <sup>++</sup> | b <sup>*</sup> | b <sup>*++</sup> | b <sup>0</sup> | b <sup>0++</sup> | Seq. | y                | y <sup>++</sup> | y <sup>*</sup>   | y <sup>*++</sup> | y <sup>0</sup> | y <sup>0++</sup> | #  |
|----|-----------------|-----------------|----------------|------------------|----------------|------------------|------|------------------|-----------------|------------------|------------------|----------------|------------------|----|
| 1  | 58.0287         | 29.5180         |                |                  |                |                  | G    |                  |                 |                  |                  |                |                  | 17 |
| 2  | <b>172.0717</b> | 86.5395         | 155.0451       | 78.0262          |                |                  | N    | 1907.8738        | 954.4406        | 1890.8473        | 945.9273         | 1889.8633      | 945.4353         | 16 |
| 3  | <b>285.1557</b> | 143.0815        | 268.1292       | 134.5682         |                |                  | L    | 1793.8309        | 897.4191        | 1776.8044        | 888.9058         | 1775.8204      | 888.4138         | 15 |
| 4  | <b>398.2398</b> | 199.6235        | 381.2132       | 191.1103         |                |                  | L    | <b>1680.7469</b> | 840.8771        | 1663.7203        | 832.3638         | 1662.7363      | 831.8718         | 14 |
| 5  | 527.2824        | 264.1448        | 510.2558       | 255.6316         |                |                  | Q    | <b>1567.6628</b> | 784.3350        | <b>1550.6362</b> | 775.8218         | 1549.6522      | <b>775.3298</b>  | 13 |
| 6  | 687.3130        | 344.1602        | 670.2865       | 335.6469         |                |                  | C    | 1438.6202        | 719.8137        | 1421.5936        | 711.3005         | 1420.6096      | 710.8085         | 12 |
| 7  | 800.3971        | 400.7022        | 783.3706       | 392.1889         |                |                  | I    | 1278.5895        | 639.7984        | 1261.5630        | 631.2851         | 1260.5790      | 630.7931         | 11 |
| 8  | 960.4278        | 480.7175        | 943.4012       | 472.2042         |                |                  | C    | <b>1165.5055</b> | 583.2564        | 1148.4789        | 574.7431         | 1147.4949      | 574.2511         | 10 |
| 9  | 1061.4754       | 531.2414        | 1044.4489      | 522.7281         | 1043.4649      | 522.2361         | T    | 1005.4748        | 503.2411        | 988.4483         | 494.7278         | 987.4643       | 494.2358         | 9  |
| 10 | 1118.4969       | 559.7521        | 1101.4703      | 551.2388         | 1100.4863      | 550.7468         | G    | <b>904.4272</b>  | 452.7172        | 887.4006         | 444.2039         | 886.4166       | 443.7119         | 8  |
| 11 | 1233.5238       | 617.2656        | 1216.4973      | 608.7523         | 1215.5133      | 608.2603         | N    | 847.4057         | 424.2065        | 830.3791         | 415.6932         | 829.3951       | 415.2012         | 7  |
| 12 | 1290.5453       | 645.7763        | 1273.5188      | 637.2630         | 1272.5347      | 636.7710         | G    | <b>732.3787</b>  | 366.6930        | 715.3522         | 358.1797         | 714.3682       | 357.6877         | 6  |
| 13 | 1446.6464       | 723.8268        | 1429.6199      | 715.3136         | 1428.6358      | 714.8216         | R    | 675.3573         | 338.1823        | 658.3307         | 329.6690         | 657.3467       | 329.1770         | 5  |
| 14 | 1503.6679       | 752.3376        | 1486.6413      | 743.8243         | 1485.6573      | 743.3323         | G    | 519.2562         | 260.1317        | 502.2296         | 251.6185         | 501.2456       | 251.1264         | 4  |
| 15 | 1632.7105       | 816.8589        | 1615.6839      | 808.3456         | 1614.6999      | 807.8536         | E    | 462.2347         | 231.6210        | 445.2082         | 223.1077         | 444.2241       | 222.6157         | 3  |

|    |           |          |           |          |           |          |   |          |          |          |          |  |  |   |
|----|-----------|----------|-----------|----------|-----------|----------|---|----------|----------|----------|----------|--|--|---|
| 16 | 1818.7898 | 909.8985 | 1801.7632 | 901.3853 | 1800.7792 | 900.8932 | W | 333.1921 | 167.0997 | 316.1656 | 158.5864 |  |  | 2 |
| 17 |           |          |           |          |           |          | K | 147.1128 | 74.0600  | 130.0863 | 65.5468  |  |  | 1 |

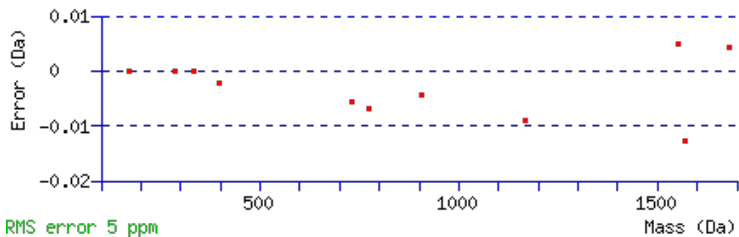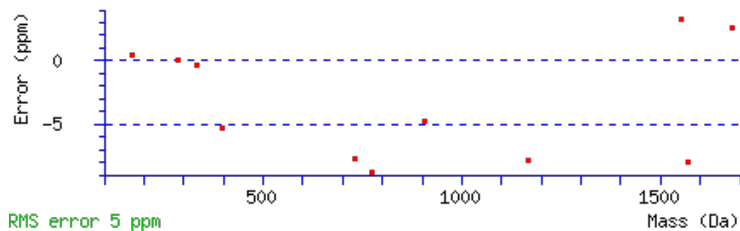

NCBI BLAST search of [GNLLQCICTGNRGEWK](#)

(Parameters: blastp, nr protein database, expect=20000, no filter, PAM30)

Other BLAST [web\\_gateways](#)

All matches to this query

| Score | Mr(calc)  | Delta  | Sequence                         |
|-------|-----------|--------|----------------------------------|
| 24.3  | 1963.8880 | 0.9971 | <a href="#">GNLLQCICTGNRGEWK</a> |

Mascot: <http://www.matrixscience.com/>

# Mascot Search Results

## Peptide View

MS/MS Fragmentation of **GNLLQCICTGNRGEWK**

Found in **P02751** in **uni\_human\_nr**, FINC\_HUMAN Fibronectin OS=Homo sapiens GN=FN1 PE=1 SV=4

Match to Query 6523: 1963.882548 from(982.948550,2+) intensity(233518.5156) rtinseconds(2539) scans(14406) index(10752)

Title: 130801\_HPL\_Human\_Plaque\_BR1\_TR1\_10\_Spectrum031716\_scans\_14406\_RTINSECONDS=2539

Data file E:\RAW\HumanPlaques\mgf\T\1D\T130801\_HPL\_Human\_Plaque\_BR1\_TR1\_10.mgf

Click mouse within plot area to zoom in by factor of two about that point

Or,  to  Da

Label all possible matches  Label matches used for scoring

Show Y-axis

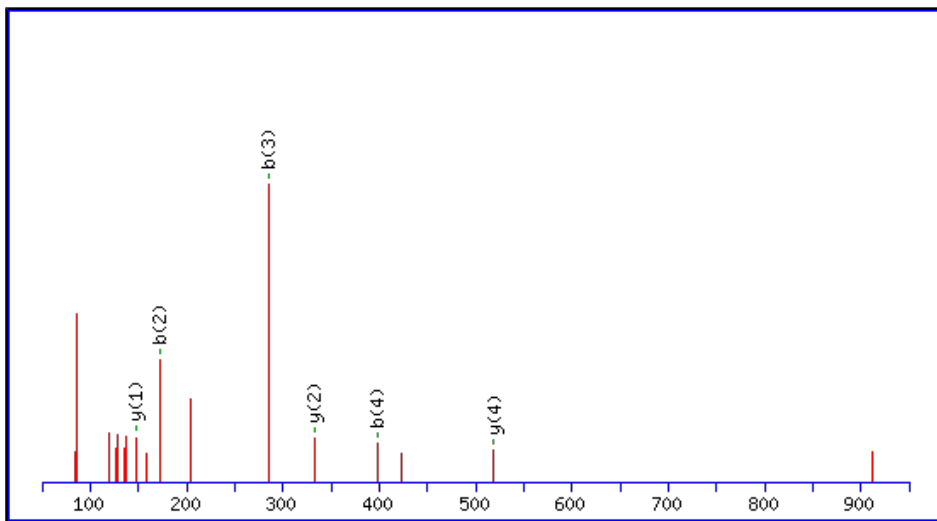

Monoisotopic mass of neutral peptide Mr(calc): 1963.8880

Fixed modifications: Carbamidomethyl (C) (apply to specified residues or termini only)

Variable modifications:

Q5 : Deamidated (NQ)

N11 : Deamidated (NQ)

Ions Score: 17 Expect: 0.83

Matches : 6/170 fragment ions using 13 most intense peaks ([help](#))

| #  | b               | b <sup>++</sup> | b*        | b <sup>+++</sup> | b <sup>0</sup> | b <sup>0++</sup> | Seq. | y               | y <sup>++</sup> | y*        | y <sup>+++</sup> | y <sup>0</sup> | y <sup>0++</sup> | #  |
|----|-----------------|-----------------|-----------|------------------|----------------|------------------|------|-----------------|-----------------|-----------|------------------|----------------|------------------|----|
| 1  | 58.0287         | 29.5180         |           |                  |                |                  | G    |                 |                 |           |                  |                |                  | 17 |
| 2  | <b>172.0717</b> | 86.5395         | 155.0451  | 78.0262          |                |                  | N    | 1907.8738       | 954.4406        | 1890.8473 | 945.9273         | 1889.8633      | 945.4353         | 16 |
| 3  | <b>285.1557</b> | 143.0815        | 268.1292  | 134.5682         |                |                  | L    | 1793.8309       | 897.4191        | 1776.8044 | 888.9058         | 1775.8204      | 888.4138         | 15 |
| 4  | <b>398.2398</b> | 199.6235        | 381.2132  | 191.1103         |                |                  | L    | 1680.7469       | 840.8771        | 1663.7203 | 832.3638         | 1662.7363      | 831.8718         | 14 |
| 5  | 527.2824        | 264.1448        | 510.2558  | 255.6316         |                |                  | Q    | 1567.6628       | 784.3350        | 1550.6362 | 775.8218         | 1549.6522      | 775.3298         | 13 |
| 6  | 687.3130        | 344.1602        | 670.2865  | 335.6469         |                |                  | C    | 1438.6202       | 719.8137        | 1421.5936 | 711.3005         | 1420.6096      | 710.8085         | 12 |
| 7  | 800.3971        | 400.7022        | 783.3706  | 392.1889         |                |                  | I    | 1278.5895       | 639.7984        | 1261.5630 | 631.2851         | 1260.5790      | 630.7931         | 11 |
| 8  | 960.4278        | 480.7175        | 943.4012  | 472.2042         |                |                  | C    | 1165.5055       | 583.2564        | 1148.4789 | 574.7431         | 1147.4949      | 574.2511         | 10 |
| 9  | 1061.4754       | 531.2414        | 1044.4489 | 522.7281         | 1043.4649      | 522.2361         | T    | 1005.4748       | 503.2411        | 988.4483  | 494.7278         | 987.4643       | 494.2358         | 9  |
| 10 | 1118.4969       | 559.7521        | 1101.4703 | 551.2388         | 1100.4863      | 550.7468         | G    | 904.4272        | 452.7172        | 887.4006  | 444.2039         | 886.4166       | 443.7119         | 8  |
| 11 | 1233.5238       | 617.2656        | 1216.4973 | 608.7523         | 1215.5133      | 608.2603         | N    | 847.4057        | 424.2065        | 830.3791  | 415.6932         | 829.3951       | 415.2012         | 7  |
| 12 | 1290.5453       | 645.7763        | 1273.5188 | 637.2630         | 1272.5347      | 636.7710         | G    | 732.3787        | 366.6930        | 715.3522  | 358.1797         | 714.3682       | 357.6877         | 6  |
| 13 | 1446.6464       | 723.8268        | 1429.6199 | 715.3136         | 1428.6358      | 714.8216         | R    | 675.3573        | 338.1823        | 658.3307  | 329.6690         | 657.3467       | 329.1770         | 5  |
| 14 | 1503.6679       | 752.3376        | 1486.6413 | 743.8243         | 1485.6573      | 743.3323         | G    | <b>519.2562</b> | 260.1317        | 502.2296  | 251.6185         | 501.2456       | 251.1264         | 4  |
| 15 | 1632.7105       | 816.8589        | 1615.6839 | 808.3456         | 1614.6999      | 807.8536         | E    | 462.2347        | 231.6210        | 445.2082  | 223.1077         | 444.2241       | 222.6157         | 3  |

|    |           |          |           |          |           |          |   |          |          |          |          |  |  |   |
|----|-----------|----------|-----------|----------|-----------|----------|---|----------|----------|----------|----------|--|--|---|
| 16 | 1818.7898 | 909.8985 | 1801.7632 | 901.3853 | 1800.7792 | 900.8932 | W | 333.1921 | 167.0997 | 316.1656 | 158.5864 |  |  | 2 |
| 17 |           |          |           |          |           |          | K | 147.1128 | 74.0600  | 130.0863 | 65.5468  |  |  | 1 |

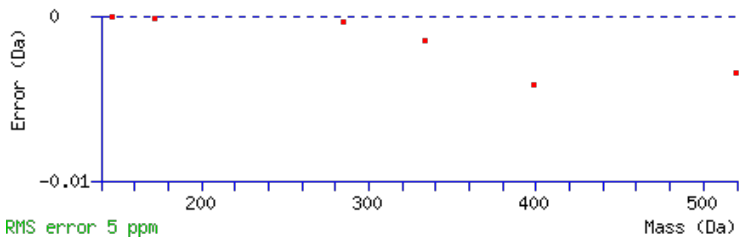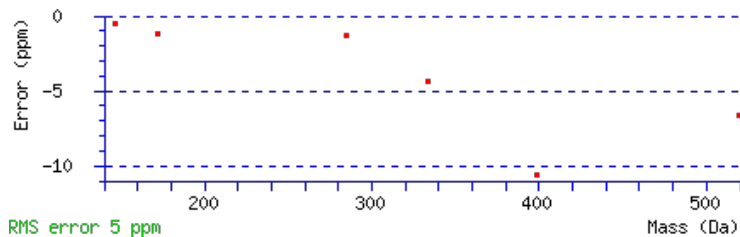

NCBI BLAST search of [GNLLQCICTGNRGEWK](#)

(Parameters: blastp, nr protein database, expect=20000, no filter, PAM30)

Other BLAST [web gateways](#)

All matches to this query

| Score | Mr(calc)  | Delta   | Sequence                         |
|-------|-----------|---------|----------------------------------|
| 17.3  | 1963.8880 | -0.0055 | <a href="#">GNLLQCICTGNRGEWK</a> |
| 2.2   | 1963.8727 | 0.0098  | <a href="#">QRLMQCDLEEEENVR</a>  |

Mascot: <http://www.matrixscience.com/>

# Mascot Search Results

## Peptide View

MS/MS Fragmentation of **G<sub>N</sub>LLQ<sub>C</sub>ICTGNGRGEWK**

Found in **P02751** in **uni\_human\_nr**, FINC\_HUMAN Fibronectin OS=Homo sapiens GN=FN1 PE=1 SV=4

Match to Query 8657: 1962.903288 from(982.458920,2+) intensity(18874392.0000) rtinseconds(2200) scans(13137) index(10184)

Title: 130801\_HPL\_Human\_Plaque\_BR2\_TR1\_03\_Spectrum033126\_scans\_\_13137\_RTINSECONDS=2200

Data file E:\RAW\HumanPlaques\mgf\T\1D\T130801\_HPL\_Human\_Plaque\_BR2\_TR1\_03.mgf

Click mouse within plot area to zoom in by factor of two about that point

Or,  to  Da

Label all possible matches  Label matches used for scoring

Show Y-axis

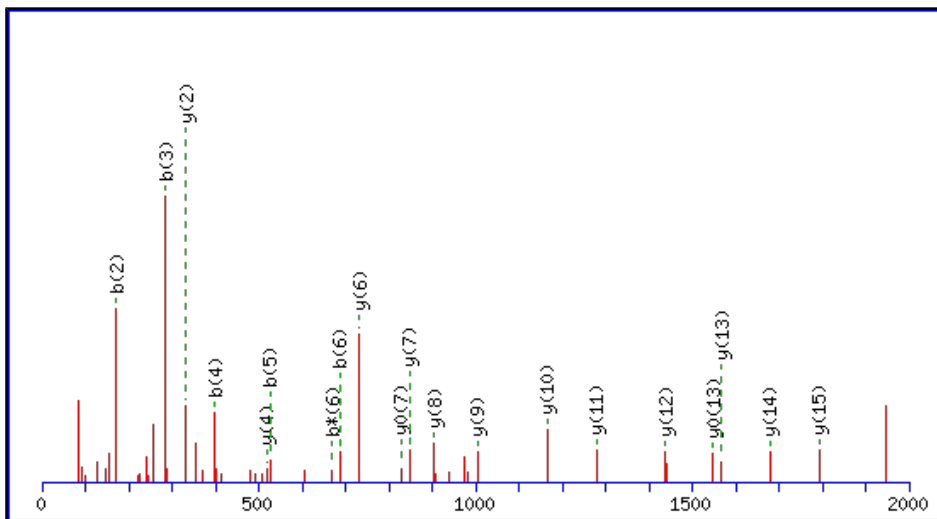

**Monoisotopic mass of neutral peptide Mr(calc):** 1962.9040

**Fixed modifications:** Carbamidomethyl (C) (apply to specified residues or termini only)

**Variable modifications:**

N11 : Deamidated (NQ)

**Ions Score:** 107 **Expect:** 1.1e-009

**Matches :** 20/170 fragment ions using 28 most intense peaks ([help](#))

| #  | b               | b <sup>++</sup> | b <sup>*</sup>  | b <sup>*++</sup> | b <sup>0</sup> | b <sup>0++</sup> | Seq. | y                | y <sup>++</sup> | y <sup>*</sup> | y <sup>*++</sup> | y <sup>0</sup>   | y <sup>0++</sup> | #  |
|----|-----------------|-----------------|-----------------|------------------|----------------|------------------|------|------------------|-----------------|----------------|------------------|------------------|------------------|----|
| 1  | 58.0287         | 29.5180         |                 |                  |                |                  | G    |                  |                 |                |                  |                  |                  | 17 |
| 2  | <b>172.0717</b> | 86.5395         | 155.0451        | 78.0262          |                |                  | N    | 1906.8898        | 953.9486        | 1889.8633      | 945.4353         | 1888.8793        | 944.9433         | 16 |
| 3  | <b>285.1557</b> | 143.0815        | 268.1292        | 134.5682         |                |                  | L    | <b>1792.8469</b> | 896.9271        | 1775.8204      | 888.4138         | 1774.8363        | 887.9218         | 15 |
| 4  | <b>398.2398</b> | 199.6235        | 381.2132        | 191.1103         |                |                  | L    | <b>1679.7628</b> | 840.3851        | 1662.7363      | 831.8718         | 1661.7523        | 831.3798         | 14 |
| 5  | <b>526.2984</b> | 263.6528        | 509.2718        | 255.1396         |                |                  | Q    | <b>1566.6788</b> | 783.8430        | 1549.6522      | 775.3298         | <b>1548.6682</b> | 774.8377         | 13 |
| 6  | <b>686.3290</b> | 343.6681        | <b>669.3025</b> | 335.1549         |                |                  | C    | <b>1438.6202</b> | 719.8137        | 1421.5936      | 711.3005         | 1420.6096        | 710.8085         | 12 |
| 7  | 799.4131        | 400.2102        | 782.3865        | 391.6969         |                |                  | I    | <b>1278.5895</b> | 639.7984        | 1261.5630      | 631.2851         | 1260.5790        | 630.7931         | 11 |
| 8  | 959.4437        | 480.2255        | 942.4172        | 471.7122         |                |                  | C    | <b>1165.5055</b> | 583.2564        | 1148.4789      | 574.7431         | 1147.4949        | 574.2511         | 10 |
| 9  | 1060.4914       | 530.7493        | 1043.4649       | 522.2361         | 1042.4808      | 521.7441         | T    | <b>1005.4748</b> | 503.2411        | 988.4483       | 494.7278         | 987.4643         | 494.2358         | 9  |
| 10 | 1117.5129       | 559.2601        | 1100.4863       | 550.7468         | 1099.5023      | 550.2548         | G    | <b>904.4272</b>  | 452.7172        | 887.4006       | 444.2039         | 886.4166         | 443.7119         | 8  |
| 11 | 1232.5398       | 616.7735        | 1215.5133       | 608.2603         | 1214.5293      | 607.7683         | N    | <b>847.4057</b>  | 424.2065        | 830.3791       | 415.6932         | <b>829.3951</b>  | 415.2012         | 7  |
| 12 | 1289.5613       | 645.2843        | 1272.5347       | 636.7710         | 1271.5507      | 636.2790         | G    | <b>732.3787</b>  | 366.6930        | 715.3522       | 358.1797         | 714.3682         | 357.6877         | 6  |
| 13 | 1445.6624       | 723.3348        | 1428.6358       | 714.8216         | 1427.6518      | 714.3296         | R    | 675.3573         | 338.1823        | 658.3307       | 329.6690         | 657.3467         | 329.1770         | 5  |
| 14 | 1502.6839       | 751.8456        | 1485.6573       | 743.3323         | 1484.6733      | 742.8403         | G    | <b>519.2562</b>  | 260.1317        | 502.2296       | 251.6185         | 501.2456         | 251.1264         | 4  |
| 15 | 1631.7265       | 816.3669        | 1614.6999       | 807.8536         | 1613.7159      | 807.3616         | E    | 462.2347         | 231.6210        | 445.2082       | 223.1077         | 444.2241         | 222.6157         | 3  |

|    |           |          |           |          |           |          |   |          |          |          |          |  |  |   |
|----|-----------|----------|-----------|----------|-----------|----------|---|----------|----------|----------|----------|--|--|---|
| 16 | 1817.8058 | 909.4065 | 1800.7792 | 900.8932 | 1799.7952 | 900.4012 | W | 333.1921 | 167.0997 | 316.1656 | 158.5864 |  |  | 2 |
| 17 |           |          |           |          |           |          | K | 147.1128 | 74.0600  | 130.0863 | 65.5468  |  |  | 1 |

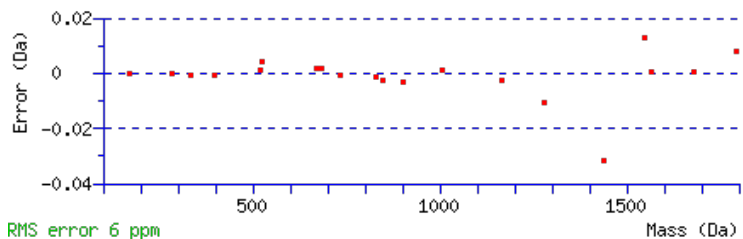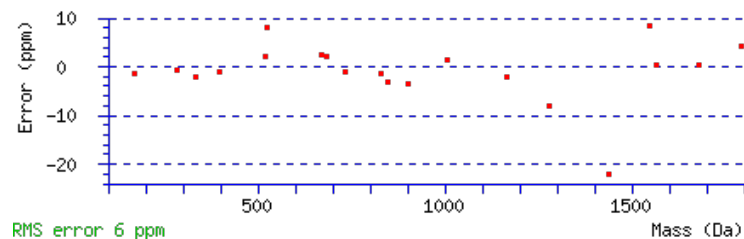

NCBI BLAST search of [GNLLQCICTGNRGEWK](#)

(Parameters: blastp, nr protein database, expect=20000, no filter, PAM30)

Other BLAST [web gateways](#)

**All matches to this query**

| Score | Mr(calc)  | Delta   | Sequence                         | Site Analysis          |
|-------|-----------|---------|----------------------------------|------------------------|
| 107.3 | 1962.9040 | -0.0007 | <a href="#">GNLLQCICTGNRGEWK</a> | Deamidated N11 100.00% |
| 25.3  | 1962.9040 | -0.0007 | <a href="#">GNLLQCICTGNRGEWK</a> | Deamidated Q5 0.00%    |

Mascot: <http://www.matrixscience.com/>

# Mascot Search Results

## Peptide View

MS/MS Fragmentation of **GNLLQCICTGNRGEWK**

Found in **P02751** in **uni\_human\_nr**, FINC\_HUMAN Fibronectin OS=Homo sapiens GN=FN1 PE=1 SV=4

Match to Query 9066: 1962.903762 from(655.308530,3+) intensity(119695248.0000) rtinseconds(2190) scans(13640) index(10792)

Title: 130809\_HPL\_Human\_Plaque\_BR2\_TR3\_03\_Spectrum034580\_scans\_\_13640\_RTINSECONDS=2190

Data file E:\RAW\HumanPlaques\mgf\T\1D\T130809\_HPL\_Human\_Plaque\_BR2\_TR3\_03.mgf

Click mouse within plot area to zoom in by factor of two about that point

Or,  to  Da

Label all possible matches  Label matches used for scoring

Show Y-axis

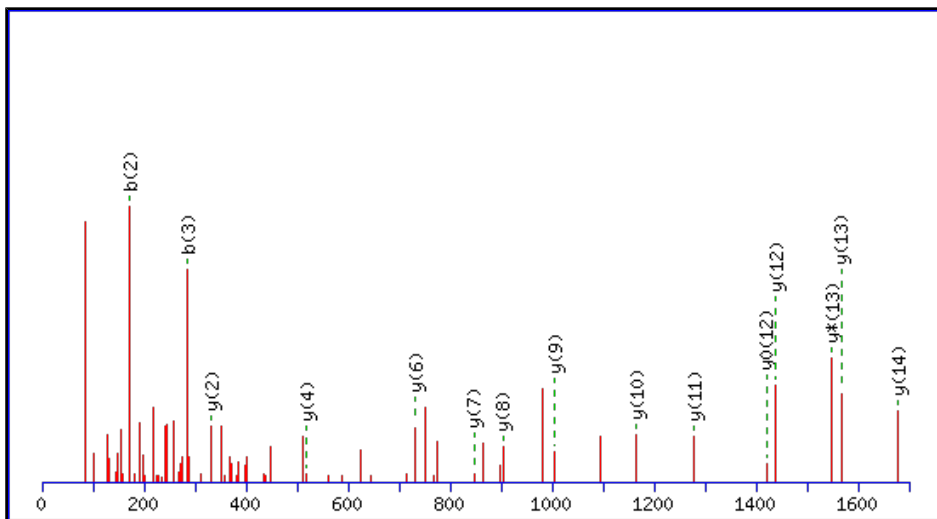

**Monoisotopic mass of neutral peptide Mr(calc):** 1962.9040

**Fixed modifications:** Carbamidomethyl (C) (apply to specified residues or termini only)

**Variable modifications:**

N11 : Deamidated (NQ)

**Ions Score:** 73 **Expect:** 2.5e-006

**Matches :** 15/170 fragment ions using 29 most intense peaks ([help](#))

| #  | b               | b <sup>++</sup> | b <sup>*</sup> | b <sup>*++</sup> | b <sup>0</sup> | b <sup>0++</sup> | Seq. | y                | y <sup>++</sup> | y <sup>*</sup>   | y <sup>*++</sup> | y <sup>0</sup>   | y <sup>0++</sup> | #  |
|----|-----------------|-----------------|----------------|------------------|----------------|------------------|------|------------------|-----------------|------------------|------------------|------------------|------------------|----|
| 1  | 58.0287         | 29.5180         |                |                  |                |                  | G    |                  |                 |                  |                  |                  |                  | 17 |
| 2  | <b>172.0717</b> | 86.5395         | 155.0451       | 78.0262          |                |                  | N    | 1906.8898        | 953.9486        | 1889.8633        | 945.4353         | 1888.8793        | 944.9433         | 16 |
| 3  | <b>285.1557</b> | 143.0815        | 268.1292       | 134.5682         |                |                  | L    | 1792.8469        | 896.9271        | 1775.8204        | 888.4138         | 1774.8363        | 887.9218         | 15 |
| 4  | 398.2398        | 199.6235        | 381.2132       | 191.1103         |                |                  | L    | <b>1679.7628</b> | 840.3851        | 1662.7363        | 831.8718         | 1661.7523        | 831.3798         | 14 |
| 5  | 526.2984        | 263.6528        | 509.2718       | 255.1396         |                |                  | Q    | <b>1566.6788</b> | 783.8430        | <b>1549.6522</b> | 775.3298         | 1548.6682        | 774.8377         | 13 |
| 6  | 686.3290        | 343.6681        | 669.3025       | 335.1549         |                |                  | C    | <b>1438.6202</b> | 719.8137        | 1421.5936        | 711.3005         | <b>1420.6096</b> | 710.8085         | 12 |
| 7  | 799.4131        | 400.2102        | 782.3865       | 391.6969         |                |                  | I    | <b>1278.5895</b> | 639.7984        | 1261.5630        | 631.2851         | 1260.5790        | 630.7931         | 11 |
| 8  | 959.4437        | 480.2255        | 942.4172       | 471.7122         |                |                  | C    | <b>1165.5055</b> | 583.2564        | 1148.4789        | 574.7431         | 1147.4949        | 574.2511         | 10 |
| 9  | 1060.4914       | 530.7493        | 1043.4649      | 522.2361         | 1042.4808      | 521.7441         | T    | <b>1005.4748</b> | 503.2411        | 988.4483         | 494.7278         | 987.4643         | 494.2358         | 9  |
| 10 | 1117.5129       | 559.2601        | 1100.4863      | 550.7468         | 1099.5023      | 550.2548         | G    | <b>904.4272</b>  | 452.7172        | 887.4006         | 444.2039         | 886.4166         | 443.7119         | 8  |
| 11 | 1232.5398       | 616.7735        | 1215.5133      | 608.2603         | 1214.5293      | 607.7683         | N    | <b>847.4057</b>  | 424.2065        | 830.3791         | 415.6932         | 829.3951         | 415.2012         | 7  |
| 12 | 1289.5613       | 645.2843        | 1272.5347      | 636.7710         | 1271.5507      | 636.2790         | G    | <b>732.3787</b>  | 366.6930        | 715.3522         | 358.1797         | 714.3682         | 357.6877         | 6  |
| 13 | 1445.6624       | 723.3348        | 1428.6358      | 714.8216         | 1427.6518      | 714.3296         | R    | 675.3573         | 338.1823        | 658.3307         | 329.6690         | 657.3467         | 329.1770         | 5  |
| 14 | 1502.6839       | 751.8456        | 1485.6573      | 743.3323         | 1484.6733      | 742.8403         | G    | <b>519.2562</b>  | 260.1317        | 502.2296         | 251.6185         | 501.2456         | 251.1264         | 4  |
| 15 | 1631.7265       | 816.3669        | 1614.6999      | 807.8536         | 1613.7159      | 807.3616         | E    | 462.2347         | 231.6210        | 445.2082         | 223.1077         | 444.2241         | 222.6157         | 3  |



|    |           |          |           |          |           |          |   |          |          |          |          |  |  |   |
|----|-----------|----------|-----------|----------|-----------|----------|---|----------|----------|----------|----------|--|--|---|
| 16 | 1817.8058 | 909.4065 | 1800.7792 | 900.8932 | 1799.7952 | 900.4012 | W | 333.1921 | 167.0997 | 316.1656 | 158.5864 |  |  | 2 |
| 17 |           |          |           |          |           |          | K | 147.1128 | 74.0600  | 130.0863 | 65.5468  |  |  | 1 |

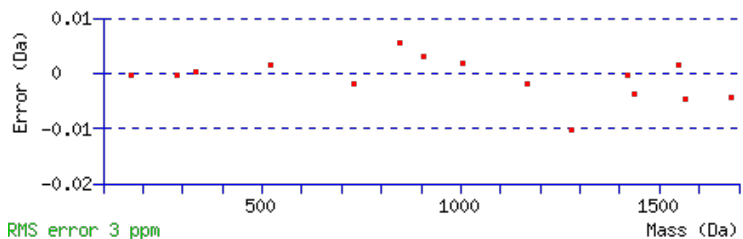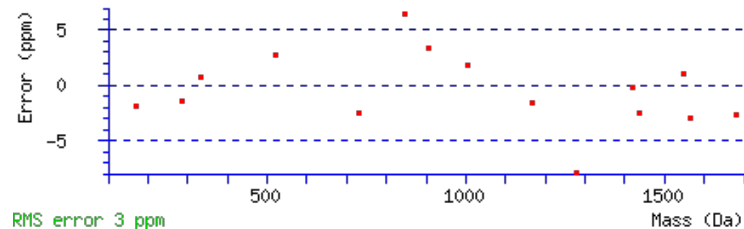

NCBI BLAST search of [GNLLQCICTGNRGEWK](#)

(Parameters: blastp, nr protein database, expect=20000, no filter, PAM30)

Other BLAST [web gateways](#)

All matches to this query

| Score | Mr(calc)  | Delta   | Sequence                         | Site Analysis          |
|-------|-----------|---------|----------------------------------|------------------------|
| 73.4  | 1962.9040 | -0.0002 | <a href="#">GNLLQCICTGNRGEWK</a> | Deamidated N11 100.00% |
| 12.7  | 1962.9040 | -0.0002 | <a href="#">GNLLQCICTGNRGEWK</a> | Deamidated Q5 0.00%    |

Mascot: <http://www.matrixscience.com/>

# Mascot Search Results

## Peptide View

MS/MS Fragmentation of **G<sub>N</sub>LLQ<sub>C</sub>ICTGNGRGEWK**

Found in **P02751** in **uni\_human\_nr**, FINC\_HUMAN Fibronectin OS=Homo sapiens GN=FN1 PE=1 SV=4

Match to Query 10052: 1961.916848 from(981.965700,2+) intensity(10108480.0000) rtinseconds(1882) scans(11550) index(8876)

Title: 130806\_HPL\_Human\_Plaque\_BR2\_TR2\_02\_Spectrum033709\_scans\_\_11550\_RTINSECONDS=1882

Data file E:\RAW\HumanPlaques\mgf\T\1D\T130806\_HPL\_Human\_Plaque\_BR2\_TR2\_02.mgf

Click mouse within plot area to zoom in by factor of two about that point

Or,  to  Da

Label all possible matches  Label matches used for scoring

Show Y-axis

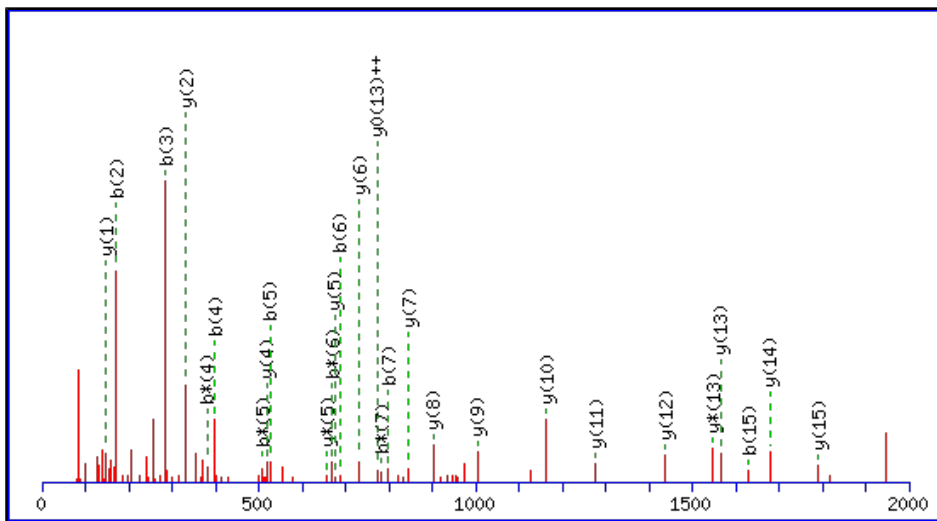

Monoisotopic mass of neutral peptide **Mr(calc)**: 1961.9200

Fixed modifications: Carbamidomethyl (C) (apply to specified residues or termini only)

Ions Score: 112 Expect: 4e-010

Matches : 28/170 fragment ions using 48 most intense peaks ([help](#))

| #  | b                | b <sup>++</sup> | b <sup>*</sup>  | b <sup>*++</sup> | b <sup>0</sup> | b <sup>0++</sup> | Seq. | y                | y <sup>++</sup> | y <sup>*</sup>   | y <sup>*++</sup> | y <sup>0</sup> | y <sup>0++</sup> | #  |
|----|------------------|-----------------|-----------------|------------------|----------------|------------------|------|------------------|-----------------|------------------|------------------|----------------|------------------|----|
| 1  | 58.0287          | 29.5180         |                 |                  |                |                  | G    |                  |                 |                  |                  |                |                  | 17 |
| 2  | <b>172.0717</b>  | 86.5395         | 155.0451        | 78.0262          |                |                  | N    | 1905.9058        | 953.4565        | 1888.8793        | 944.9433         | 1887.8952      | 944.4513         | 16 |
| 3  | <b>285.1557</b>  | 143.0815        | 268.1292        | 134.5682         |                |                  | L    | <b>1791.8629</b> | 896.4351        | 1774.8363        | 887.9218         | 1773.8523      | 887.4298         | 15 |
| 4  | <b>398.2398</b>  | 199.6235        | <b>381.2132</b> | 191.1103         |                |                  | L    | <b>1678.7788</b> | 839.8930        | 1661.7523        | 831.3798         | 1660.7683      | 830.8878         | 14 |
| 5  | <b>526.2984</b>  | 263.6528        | <b>509.2718</b> | 255.1396         |                |                  | Q    | <b>1565.6948</b> | 783.3510        | <b>1548.6682</b> | 774.8377         | 1547.6842      | <b>774.3457</b>  | 13 |
| 6  | <b>686.3290</b>  | 343.6681        | <b>669.3025</b> | 335.1549         |                |                  | C    | <b>1437.6362</b> | 719.3217        | 1420.6096        | 710.8085         | 1419.6256      | 710.3164         | 12 |
| 7  | <b>799.4131</b>  | 400.2102        | <b>782.3865</b> | 391.6969         |                |                  | I    | <b>1277.6055</b> | 639.3064        | 1260.5790        | 630.7931         | 1259.5950      | 630.3011         | 11 |
| 8  | 959.4437         | 480.2255        | 942.4172        | 471.7122         |                |                  | C    | <b>1164.5215</b> | 582.7644        | 1147.4949        | 574.2511         | 1146.5109      | 573.7591         | 10 |
| 9  | 1060.4914        | 530.7493        | 1043.4649       | 522.2361         | 1042.4808      | 521.7441         | T    | <b>1004.4908</b> | 502.7490        | 987.4643         | 494.2358         | 986.4803       | 493.7438         | 9  |
| 10 | 1117.5129        | 559.2601        | 1100.4863       | 550.7468         | 1099.5023      | 550.2548         | G    | <b>903.4431</b>  | 452.2252        | 886.4166         | 443.7119         | 885.4326       | 443.2199         | 8  |
| 11 | 1231.5558        | 616.2815        | 1214.5293       | 607.7683         | 1213.5452      | 607.2763         | N    | <b>846.4217</b>  | 423.7145        | 829.3951         | 415.2012         | 828.4111       | 414.7092         | 7  |
| 12 | 1288.5773        | 644.7923        | 1271.5507       | 636.2790         | 1270.5667      | 635.7870         | G    | <b>732.3787</b>  | 366.6930        | 715.3522         | 358.1797         | 714.3682       | 357.6877         | 6  |
| 13 | 1444.6784        | 722.8428        | 1427.6518       | 714.3296         | 1426.6678      | 713.8375         | R    | <b>675.3573</b>  | 338.1823        | <b>658.3307</b>  | 329.6690         | 657.3467       | 329.1770         | 5  |
| 14 | 1501.6998        | 751.3536        | 1484.6733       | 742.8403         | 1483.6893      | 742.3483         | G    | <b>519.2562</b>  | 260.1317        | 502.2296         | 251.6185         | 501.2456       | 251.1264         | 4  |
| 15 | <b>1630.7424</b> | 815.8749        | 1613.7159       | 807.3616         | 1612.7319      | 806.8696         | E    | 462.2347         | 231.6210        | 445.2082         | 223.1077         | 444.2241       | 222.6157         | 3  |
| 16 | 1816.8217        | 908.9145        | 1799.7952       | 900.4012         | 1798.8112      | 899.9092         | W    | <b>333.1921</b>  | 167.0997        | 316.1656         | 158.5864         |                |                  | 2  |

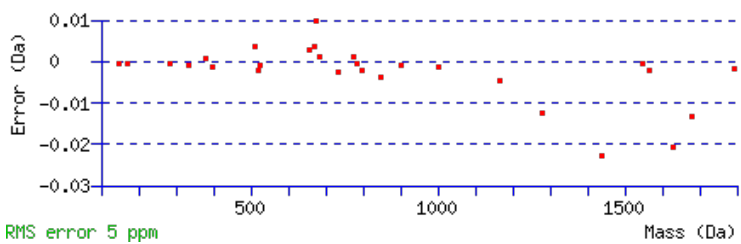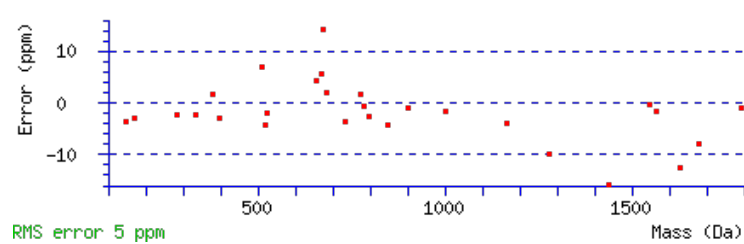

NCBI **BLAST** search of [GNLLQCICTGNGRGEWK](#)

(Parameters: blastp, nr protein database, expect=20000, no filter, PAM30)

Other BLAST [web gateways](#)

**All matches to this query**

| Score | Mr(calc)  | Delta   | Sequence                            |
|-------|-----------|---------|-------------------------------------|
| 112.3 | 1961.9200 | -0.0032 | <a href="#">GNLLQCICTGNGRGEWK</a>   |
| 1.1   | 1961.9178 | -0.0009 | <a href="#">NGLKODEPGQAGSOKSSTK</a> |

Mascot: <http://www.matrixscience.com/>

# Mascot Search Results

## Peptide View

MS/MS Fragmentation of **GNLLQCICTGNGRGEWK**

Found in **P02751** in **uni\_human\_nr**, FINC\_HUMAN Fibronectin OS=Homo sapiens GN=FN1 PE=1 SV=4

Match to Query 10084: 1961.916462 from(654.979430,3+) intensity(160983184.0000) rtinseconds(1856) scans(11481) index(8796)

Title: 130809\_HPL\_Human\_Plaque\_BR2\_TR3\_02\_Spectrum033649\_scans\_\_11481\_RTINSECONDS=1856

Data file E:\RAW\HumanPlaques\mgf\T\1D\T130809\_HPL\_Human\_Plaque\_BR2\_TR3\_02.mgf

Click mouse within plot area to zoom in by factor of two about that point

Or,  to  Da

Label all possible matches  Label matches used for scoring

Show Y-axis

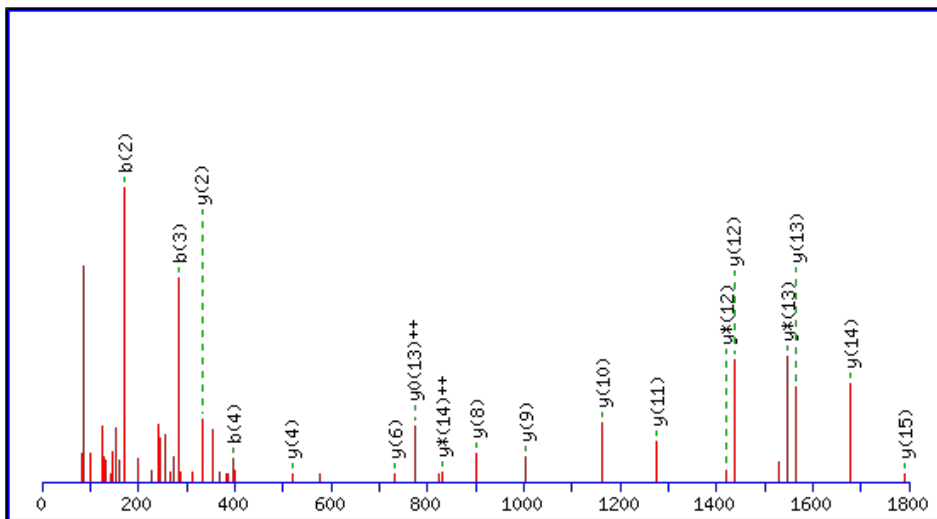

Monoisotopic mass of neutral peptide Mr(calc): 1961.9200

Fixed modifications: Carbamidomethyl (C) (apply to specified residues or termini only)

Ions Score: 93 Expect: 3.3e-008

Matches : 18/170 fragment ions using 25 most intense peaks ([help](#))

| #  | b               | b <sup>++</sup> | b*        | b <sup>*++</sup> | b <sup>0</sup> | b <sup>0++</sup> | Seq. | y                | y <sup>++</sup> | y*               | y <sup>*++</sup> | y <sup>0</sup> | y <sup>0++</sup> | #  |
|----|-----------------|-----------------|-----------|------------------|----------------|------------------|------|------------------|-----------------|------------------|------------------|----------------|------------------|----|
| 1  | 58.0287         | 29.5180         |           |                  |                |                  | G    |                  |                 |                  |                  |                |                  | 17 |
| 2  | <b>172.0717</b> | 86.5395         | 155.0451  | 78.0262          |                |                  | N    | 1905.9058        | 953.4565        | 1888.8793        | 944.9433         | 1887.8952      | 944.4513         | 16 |
| 3  | <b>285.1557</b> | 143.0815        | 268.1292  | 134.5682         |                |                  | L    | <b>1791.8629</b> | 896.4351        | 1774.8363        | 887.9218         | 1773.8523      | 887.4298         | 15 |
| 4  | <b>398.2398</b> | 199.6235        | 381.2132  | 191.1103         |                |                  | L    | <b>1678.7788</b> | 839.8930        | 1661.7523        | <b>831.3798</b>  | 1660.7683      | 830.8878         | 14 |
| 5  | 526.2984        | 263.6528        | 509.2718  | 255.1396         |                |                  | Q    | <b>1565.6948</b> | 783.3510        | <b>1548.6682</b> | 774.8377         | 1547.6842      | <b>774.3457</b>  | 13 |
| 6  | 686.3290        | 343.6681        | 669.3025  | 335.1549         |                |                  | C    | <b>1437.6362</b> | 719.3217        | <b>1420.6096</b> | 710.8085         | 1419.6256      | 710.3164         | 12 |
| 7  | 799.4131        | 400.2102        | 782.3865  | 391.6969         |                |                  | I    | <b>1277.6055</b> | 639.3064        | 1260.5790        | 630.7931         | 1259.5950      | 630.3011         | 11 |
| 8  | 959.4437        | 480.2255        | 942.4172  | 471.7122         |                |                  | C    | <b>1164.5215</b> | 582.7644        | 1147.4949        | 574.2511         | 1146.5109      | 573.7591         | 10 |
| 9  | 1060.4914       | 530.7493        | 1043.4649 | 522.2361         | 1042.4808      | 521.7441         | T    | <b>1004.4908</b> | 502.7490        | 987.4643         | 494.2358         | 986.4803       | 493.7438         | 9  |
| 10 | 1117.5129       | 559.2601        | 1100.4863 | 550.7468         | 1099.5023      | 550.2548         | G    | <b>903.4431</b>  | 452.2252        | 886.4166         | 443.7119         | 885.4326       | 443.2199         | 8  |
| 11 | 1231.5558       | 616.2815        | 1214.5293 | 607.7683         | 1213.5452      | 607.2763         | N    | 846.4217         | 423.7145        | 829.3951         | 415.2012         | 828.4111       | 414.7092         | 7  |
| 12 | 1288.5773       | 644.7923        | 1271.5507 | 636.2790         | 1270.5667      | 635.7870         | G    | <b>732.3787</b>  | 366.6930        | 715.3522         | 358.1797         | 714.3682       | 357.6877         | 6  |
| 13 | 1444.6784       | 722.8428        | 1427.6518 | 714.3296         | 1426.6678      | 713.8375         | R    | 675.3573         | 338.1823        | 658.3307         | 329.6690         | 657.3467       | 329.1770         | 5  |
| 14 | 1501.6998       | 751.3536        | 1484.6733 | 742.8403         | 1483.6893      | 742.3483         | G    | <b>519.2562</b>  | 260.1317        | 502.2296         | 251.6185         | 501.2456       | 251.1264         | 4  |
| 15 | 1630.7424       | 815.8749        | 1613.7159 | 807.3616         | 1612.7319      | 806.8696         | E    | 462.2347         | 231.6210        | 445.2082         | 223.1077         | 444.2241       | 222.6157         | 3  |
| 16 | 1816.8217       | 908.9145        | 1799.7952 | 900.4012         | 1798.8112      | 899.9092         | W    | <b>333.1921</b>  | 167.0997        | 316.1656         | 158.5864         |                |                  | 2  |

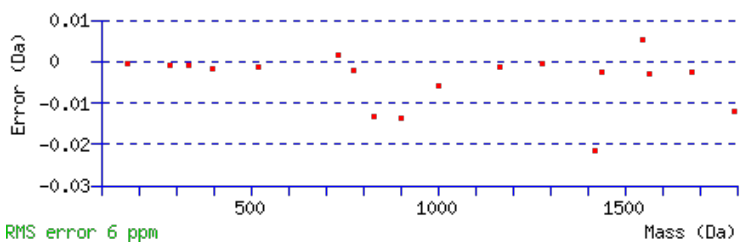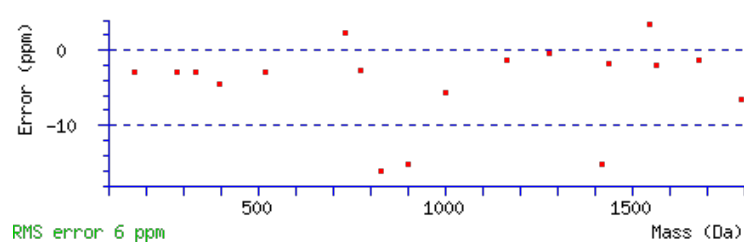

NCBI BLAST search of [GNLLQCICTGNRGEWK](#)

(Parameters: blastp, nr protein database, expect=20000, no filter, PAM30)

Other BLAST [web gateways](#)

All matches to this query

| Score | Mr(calc)  | Delta   | Sequence                            |
|-------|-----------|---------|-------------------------------------|
| 93.0  | 1961.9200 | -0.0035 | <a href="#">GNLLQCICTGNRGEWK</a>    |
| 1.2   | 1961.9178 | -0.0013 | <a href="#">NGLKODEPGQAGSOKSSTK</a> |

Mascot: <http://www.matrixscience.com/>

# Mascot Search Results

## Peptide View

MS/MS Fragmentation of **GNLLQCICTGNRGEWK CER**

Found in **P02751** in **uni\_human\_nr**, FINC\_HUMAN Fibronectin OS=Homo sapiens GN=FN1 PE=1 SV=4

Match to Query 13072: 2408.078336 from(603.026860,4+) intensity(2229472.2500) rtinseconds(1968) scans(11501) index(8733)

Title: 130801\_HPL\_Human\_Plaque\_BR1\_TR1\_03\_Spectrum031983\_scans\_\_11501\_RTINSECONDS=1968

Data file E:\\RAW\\HumanPlaques\\imgf\\T\\1D\\T130801\_HPL\_Human\_Plaque\_BR1\_TR1\_03.mgf

Click mouse within plot area to zoom in by factor of two about that point

Or, to Da

Label all possible matches Label matches used for scoring

Show Y-axis

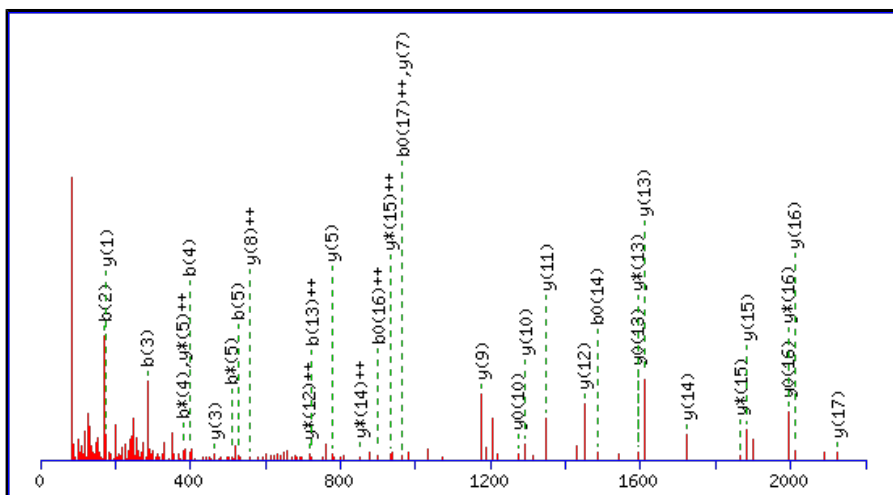

Monoisotopic mass of neutral peptide Mr(calc): 2408.0784

Fixed modifications: Carbamidomethyl (C) (apply to specified residues or termini only)

Variable modifications:

N11 : Deamidated (NQ)

Ions Score: 55 Expect: 0.00015

Matches : 34/208 fragment ions using 88 most intense peaks ([help](#))

| #  | b               | b <sup>++</sup> | b <sup>*</sup>  | b <sup>***</sup> | b <sup>0</sup>   | b <sup>0++</sup> | Seq. | y                | y <sup>++</sup> | y <sup>*</sup>   | y <sup>***</sup> | y <sup>0</sup>   | y <sup>0++</sup> | #  |
|----|-----------------|-----------------|-----------------|------------------|------------------|------------------|------|------------------|-----------------|------------------|------------------|------------------|------------------|----|
| 1  | 58.0287         | 29.5180         |                 |                  |                  |                  | G    |                  |                 |                  |                  |                  |                  | 20 |
| 2  | <b>172.0717</b> | 86.5395         | 155.0451        | 78.0262          |                  |                  | N    | 2352.0642        | 1176.5357       | 2335.0376        | 1168.0225        | 2334.0536        | 1167.5304        | 19 |
| 3  | <b>285.1557</b> | 143.0815        | 268.1292        | 134.5682         |                  |                  | L    | 2238.0213        | 1119.5143       | 2220.9947        | 1111.0010        | 2220.0107        | 1110.5090        | 18 |
| 4  | <b>398.2398</b> | 199.6235        | <b>381.2132</b> | 191.1103         |                  |                  | L    | <b>2124.9372</b> | 1062.9722       | 2107.9106        | 1054.4590        | 2106.9266        | 1053.9670        | 17 |
| 5  | <b>526.2984</b> | 263.6528        | <b>509.2718</b> | 255.1396         |                  |                  | Q    | <b>2011.8531</b> | 1006.4302       | <b>1994.8266</b> | 997.9169         | <b>1993.8426</b> | 997.4249         | 16 |
| 6  | 686.3290        | 343.6681        | 669.3025        | 335.1549         |                  |                  | C    | <b>1883.7946</b> | 942.4009        | <b>1866.7680</b> | <b>933.8876</b>  | 1865.7840        | 933.3956         | 15 |
| 7  | 799.4131        | 400.2102        | 782.3865        | 391.6969         |                  |                  | I    | <b>1723.7639</b> | 862.3856        | 1706.7374        | <b>853.8723</b>  | 1705.7533        | 853.3803         | 14 |
| 8  | 959.4437        | 480.2255        | 942.4172        | 471.7122         |                  |                  | C    | <b>1610.6798</b> | 805.8436        | <b>1593.6533</b> | 797.3303         | <b>1592.6693</b> | 796.8383         | 13 |
| 9  | 1060.4914       | 530.7493        | 1043.4649       | 522.2361         | 1042.4808        | 521.7441         | T    | <b>1450.6492</b> | 725.8282        | 1433.6226        | <b>717.3150</b>  | 1432.6386        | 716.8229         | 12 |
| 10 | 1117.5129       | 559.2601        | 1100.4863       | 550.7468         | 1099.5023        | 550.2548         | G    | <b>1349.6015</b> | 675.3044        | 1332.5750        | 666.7911         | 1331.5909        | 666.2991         | 11 |
| 11 | 1232.5398       | 616.7735        | 1215.5133       | 608.2603         | 1214.5293        | 607.7683         | N    | <b>1292.5800</b> | 646.7937        | 1275.5535        | 638.2804         | <b>1274.5695</b> | 637.7884         | 10 |
| 12 | 1289.5613       | 645.2843        | 1272.5347       | 636.7710         | 1271.5507        | 636.2790         | G    | <b>1177.5531</b> | 589.2802        | 1160.5266        | 580.7669         | 1159.5425        | 580.2749         | 9  |
| 13 | 1445.6624       | <b>723.3348</b> | 1428.6358       | 714.8216         | 1427.6518        | 714.3296         | R    | 1120.5316        | <b>560.7695</b> | 1103.5051        | 552.2562         | 1102.5211        | 551.7642         | 8  |
| 14 | 1502.6839       | 751.8456        | 1485.6573       | 743.3323         | <b>1484.6733</b> | 742.8403         | G    | <b>964.4305</b>  | 482.7189        | 947.4040         | 474.2056         | 946.4200         | 473.7136         | 7  |
| 15 | 1631.7265       | 816.3669        | 1614.6999       | 807.8536         | 1613.7159        | 807.3616         | E    | 907.4091         | 454.2082        | 890.3825         | 445.6949         | 889.3985         | 445.2029         | 6  |
| 16 | 1817.8058       | 909.4065        | 1800.7792       | 900.8932         | 1799.7952        | <b>900.4012</b>  | W    | <b>778.3665</b>  | 389.6869        | 761.3399         | <b>381.1736</b>  | 760.3559         | 380.6816         | 5  |
| 17 | 1945.9007       | 973.4540        | 1928.8742       | 964.9407         | 1927.8902        | <b>964.4487</b>  | K    | 592.2872         | 296.6472        | 575.2606         | 288.1339         | 574.2766         | 287.6419         | 4  |
| 18 | 2105.9314       | 1053.4693       | 2088.9048       | 1044.9561        | 2087.9208        | 1044.4640        | C    | <b>464.1922</b>  | 232.5997        | 447.1656         | 224.0865         | 446.1816         | 223.5945         | 3  |

|    |           |           |           |           |           |           |   |                 |          |          |          |          |          |   |
|----|-----------|-----------|-----------|-----------|-----------|-----------|---|-----------------|----------|----------|----------|----------|----------|---|
| 19 | 2234.9740 | 1117.9906 | 2217.9474 | 1109.4773 | 2216.9634 | 1108.9853 | E | 304.1615        | 152.5844 | 287.1350 | 144.0711 | 286.1510 | 143.5791 | 2 |
| 20 |           |           |           |           |           |           | R | <b>175.1190</b> | 88.0631  | 158.0924 | 79.5498  |          |          | 1 |

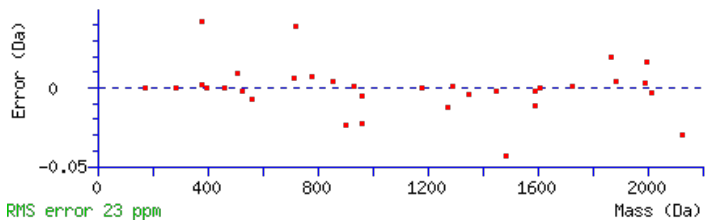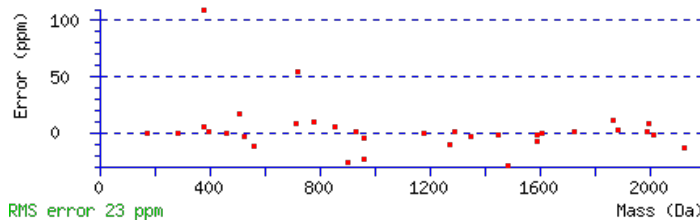

NCBI **BLAST** search of [GNLLQCICTGNRGEWK CER](#)  
 (Parameters: blastp, nr protein database, expect=20000, no filter, PAM30)  
 Other BLAST [web gateways](#)

**All matches to this query**

| Score | Mr(calc)  | Delta   | Sequence                             | Site Analysis          |
|-------|-----------|---------|--------------------------------------|------------------------|
| 54.8  | 2408.0784 | -0.0000 | <a href="#">GNLLQCICTGNRGEWK CER</a> | Deamidated N11 100.00% |
| 5.3   | 2408.0784 | -0.0000 | <a href="#">GNLLQCICTGNRGEWK CER</a> | Deamidated Q5 0.00%    |

**Mascot:** <http://www.matrixscience.com/>

# Mascot Search Results

## Peptide View

MS/MS Fragmentation of **GNLLQCICTGNRGEWK CER**

Found in **P02751** in **uni\_human\_nr**, FINC\_HUMAN Fibronectin OS=Homo sapiens GN=FN1 PE=1 SV=4

Match to Query 13496: 2407.083402 from(803.368410,3+) intensity(2074839.3750) rtinseconds(1655) scans(9304) index(6778)

Title: 130801\_HPL\_Human\_Plaque\_BR1\_TR1\_02\_Spectrum030785\_scans\_9304\_RTINSECONDS=1655

Data file E:\\RAW\\HumanPlaques\\imgf\\T\\1D\\T130801\_HPL\_Human\_Plaque\_BR1\_TR1\_02.mgf

Click mouse within plot area to zoom in by factor of two about that point

Or, to Da

Label all possible matches Label matches used for scoring

Show Y-axis

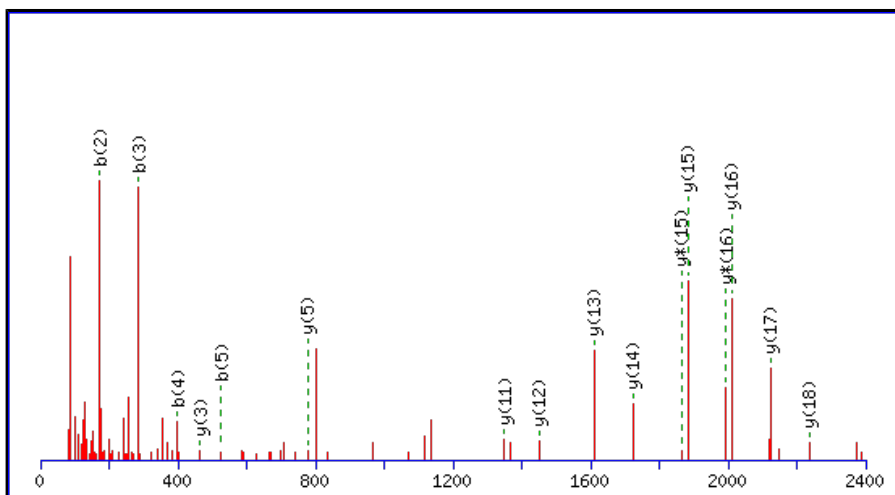

Monoisotopic mass of neutral peptide **Mr(calc):** 2407.0943

Fixed modifications: Carbamidomethyl (C) (apply to specified residues or termini only)

Ions Score: 53 Expect: 0.00029

Matches : 16/208 fragment ions using 33 most intense peaks ([help](#))

| #  | b               | b <sup>++</sup> | b <sup>*</sup> | b <sup>*++</sup> | b <sup>0</sup> | b <sup>0++</sup> | Seq. | y                | y <sup>++</sup> | y <sup>*</sup>   | y <sup>*++</sup> | y <sup>0</sup> | y <sup>0++</sup> | #  |
|----|-----------------|-----------------|----------------|------------------|----------------|------------------|------|------------------|-----------------|------------------|------------------|----------------|------------------|----|
| 1  | 58.0287         | 29.5180         |                |                  |                |                  | G    |                  |                 |                  |                  |                |                  | 20 |
| 2  | <b>172.0717</b> | 86.5395         | 155.0451       | 78.0262          |                |                  | N    | 2351.0802        | 1176.0437       | 2334.0536        | 1167.5304        | 2333.0696      | 1167.0384        | 19 |
| 3  | <b>285.1557</b> | 143.0815        | 268.1292       | 134.5682         |                |                  | L    | <b>2237.0372</b> | 1119.0223       | 2220.0107        | 1110.5090        | 2219.0267      | 1110.0170        | 18 |
| 4  | <b>398.2398</b> | 199.6235        | 381.2132       | 191.1103         |                |                  | L    | <b>2123.9532</b> | 1062.4802       | 2106.9266        | 1053.9670        | 2105.9426      | 1053.4749        | 17 |
| 5  | <b>526.2984</b> | 263.6528        | 509.2718       | 255.1396         |                |                  | Q    | <b>2010.8691</b> | 1005.9382       | <b>1993.8426</b> | 997.4249         | 1992.8585      | 996.9329         | 16 |
| 6  | 686.3290        | 343.6681        | 669.3025       | 335.1549         |                |                  | C    | <b>1882.8105</b> | 941.9089        | <b>1865.7840</b> | 933.3956         | 1864.8000      | 932.9036         | 15 |
| 7  | 799.4131        | 400.2102        | 782.3865       | 391.6969         |                |                  | I    | <b>1722.7799</b> | 861.8936        | 1705.7533        | 853.3803         | 1704.7693      | 852.8883         | 14 |
| 8  | 959.4437        | 480.2255        | 942.4172       | 471.7122         |                |                  | C    | <b>1609.6958</b> | 805.3515        | 1592.6693        | 796.8383         | 1591.6853      | 796.3463         | 13 |
| 9  | 1060.4914       | 530.7493        | 1043.4649      | 522.2361         | 1042.4808      | 521.7441         | T    | <b>1449.6652</b> | 725.3362        | 1432.6386        | 716.8229         | 1431.6546      | 716.3309         | 12 |
| 10 | 1117.5129       | 559.2601        | 1100.4863      | 550.7468         | 1099.5023      | 550.2548         | G    | <b>1348.6175</b> | 674.8124        | 1331.5909        | 666.2991         | 1330.6069      | 665.8071         | 11 |
| 11 | 1231.5558       | 616.2815        | 1214.5293      | 607.7683         | 1213.5452      | 607.2763         | N    | 1291.5960        | 646.3017        | 1274.5695        | 637.7884         | 1273.5855      | 637.2964         | 10 |
| 12 | 1288.5773       | 644.7923        | 1271.5507      | 636.2790         | 1270.5667      | 635.7870         | G    | 1177.5531        | 589.2802        | 1160.5266        | 580.7669         | 1159.5425      | 580.2749         | 9  |
| 13 | 1444.6784       | 722.8428        | 1427.6518      | 714.3296         | 1426.6678      | 713.8375         | R    | 1120.5316        | 560.7695        | 1103.5051        | 552.2562         | 1102.5211      | 551.7642         | 8  |
| 14 | 1501.6998       | 751.3536        | 1484.6733      | 742.8403         | 1483.6893      | 742.3483         | G    | 964.4305         | 482.7189        | 947.4040         | 474.2056         | 946.4200       | 473.7136         | 7  |
| 15 | 1630.7424       | 815.8749        | 1613.7159      | 807.3616         | 1612.7319      | 806.8696         | E    | 907.4091         | 454.2082        | 890.3825         | 445.6949         | 889.3985       | 445.2029         | 6  |
| 16 | 1816.8217       | 908.9145        | 1799.7952      | 900.4012         | 1798.8112      | 899.9092         | W    | <b>778.3665</b>  | 389.6869        | 761.3399         | 381.1736         | 760.3559       | 380.6816         | 5  |
| 17 | 1944.9167       | 972.9620        | 1927.8902      | 964.4487         | 1926.9061      | 963.9567         | K    | 592.2872         | 296.6472        | 575.2606         | 288.1339         | 574.2766       | 287.6419         | 4  |
| 18 | 2104.9474       | 1052.9773       | 2087.9208      | 1044.4640        | 2086.9368      | 1043.9720        | C    | <b>464.1922</b>  | 232.5997        | 447.1656         | 224.0865         | 446.1816       | 223.5945         | 3  |
| 19 | 2233.9900       | 1117.4986       | 2216.9634      | 1108.9853        | 2215.9794      | 1108.4933        | E    | 304.1615         | 152.5844        | 287.1350         | 144.0711         | 286.1510       | 143.5791         | 2  |



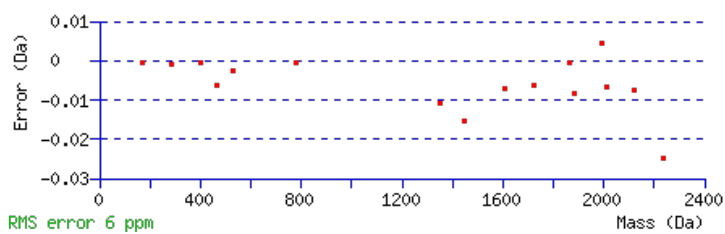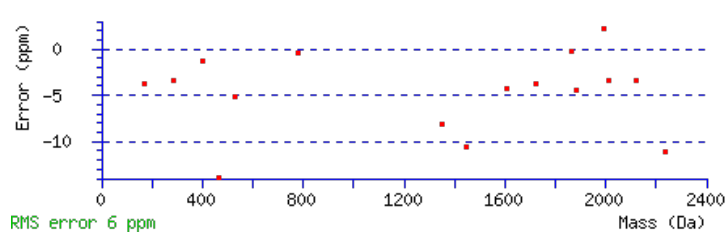

NCBI BLAST search of [GNLLQCICTGNRGEWK CER](#)  
 (Parameters: blastp, nr protein database, expect=20000, no filter, PAM30)  
 Other BLAST [web gateways](#)

All matches to this query

| Score | Mr(calc)  | Delta   | Sequence                             |
|-------|-----------|---------|--------------------------------------|
| 52.6  | 2407.0943 | -0.0109 | <a href="#">GNLLQCICTGNRGEWK CER</a> |

Mascot: <http://www.matrixscience.com/>

# Mascot Search Results

## Peptide View

MS/MS Fragmentation of **NSITLTNLTTPGTEYVVSIVALNGR**

Found in **P02751** in **uni\_human\_nr**, FINC\_HUMAN Fibronectin OS=Homo sapiens GN=FN1 PE=1 SV=4

Match to Query 11823: 2533.325832 from(845.449220,3+) intensity(82577.0000) rtinseconds(3909) scans(24109) index(18617)

Title: 130809\_HPL\_Human\_Plaque\_BR1\_TR3\_09\_Spectrum040406\_scans\_24109\_RTINSECONDS=3909

Data file E:\\RAW\\HumanPlaques\\imgf\\T\\1D\\T130809\_HPL\_Human\_Plaque\_BR1\_TR3\_09.mgf

Click mouse within plot area to zoom in by factor of two about that point

Or,  to  Da

Label all possible matches  Label matches used for scoring

Show Y-axis

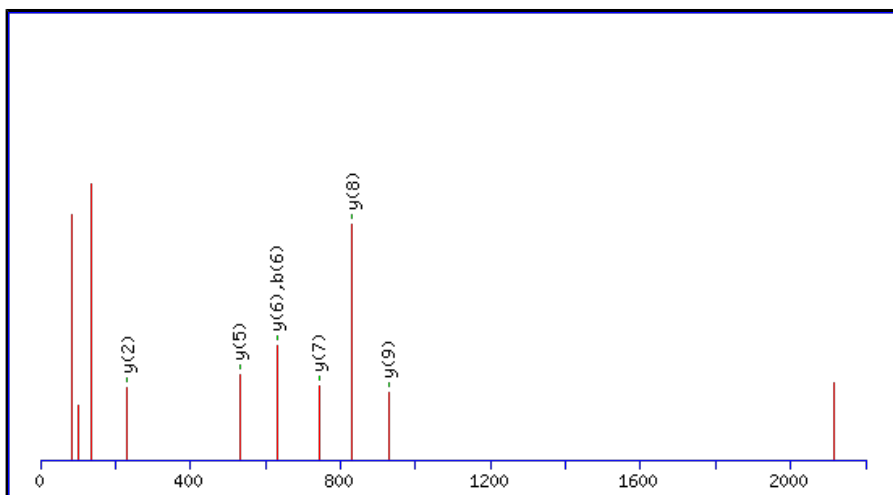

Monoisotopic mass of neutral peptide **Mr(calc): 2533.3275**

Fixed modifications: Carbamidomethyl (C) (apply to specified residues or termini only)

Variable modifications:

N7 : Deamidated (NQ)

N22 : Deamidated (NQ)

Ions Score: 41 Expect: 0.0052

Matches : 7/260 fragment ions using 8 most intense peaks ([help](#))

| #  | b               | b <sup>++</sup> | b <sup>*</sup> | b <sup>+++</sup> | b <sup>0</sup> | b <sup>0++</sup> | Seq. | y               | y <sup>++</sup> | y <sup>*</sup> | y <sup>+++</sup> | y <sup>0</sup> | y <sup>0++</sup> | #  |
|----|-----------------|-----------------|----------------|------------------|----------------|------------------|------|-----------------|-----------------|----------------|------------------|----------------|------------------|----|
| 1  | 115.0502        | 58.0287         | 98.0237        | 49.5155          |                |                  | N    |                 |                 |                |                  |                |                  | 24 |
| 2  | 202.0822        | 101.5448        | 185.0557       | 93.0315          | 184.0717       | 92.5395          | S    | 2420.2919       | 1210.6496       | 2403.2654      | 1202.1363        | 2402.2813      | 1201.6443        | 23 |
| 3  | 315.1663        | 158.0868        | 298.1397       | 149.5735         | 297.1557       | 149.0815         | I    | 2333.2599       | 1167.1336       | 2316.2333      | 1158.6203        | 2315.2493      | 1158.1283        | 22 |
| 4  | 416.2140        | 208.6106        | 399.1874       | 200.0974         | 398.2034       | 199.6053         | T    | 2220.1758       | 1110.5915       | 2203.1493      | 1102.0783        | 2202.1652      | 1101.5863        | 21 |
| 5  | 529.2980        | 265.1527        | 512.2715       | 256.6394         | 511.2875       | 256.1474         | L    | 2119.1281       | 1060.0677       | 2102.1016      | 1051.5544        | 2101.1176      | 1051.0624        | 20 |
| 6  | <b>630.3457</b> | 315.6765        | 613.3192       | 307.1632         | 612.3352       | 306.6712         | T    | 2006.0441       | 1003.5257       | 1989.0175      | 995.0124         | 1988.0335      | 994.5204         | 19 |
| 7  | 745.3727        | 373.1900        | 728.3461       | 364.6767         | 727.3621       | 364.1847         | N    | 1904.9964       | 953.0018        | 1887.9698      | 944.4886         | 1886.9858      | 943.9965         | 18 |
| 8  | 858.4567        | 429.7320        | 841.4302       | 421.2187         | 840.4462       | 420.7267         | L    | 1789.9694       | 895.4884        | 1772.9429      | 886.9751         | 1771.9589      | 886.4831         | 17 |
| 9  | 959.5044        | 480.2558        | 942.4779       | 471.7426         | 941.4938       | 471.2506         | T    | 1676.8854       | 838.9463        | 1659.8588      | 830.4331         | 1658.8748      | 829.9410         | 16 |
| 10 | 1056.5572       | 528.7822        | 1039.5306      | 520.2689         | 1038.5466      | 519.7769         | P    | 1575.8377       | 788.4225        | 1558.8112      | 779.9092         | 1557.8271      | 779.4172         | 15 |
| 11 | 1113.5786       | 557.2930        | 1096.5521      | 548.7797         | 1095.5681      | 548.2877         | G    | 1478.7849       | 739.8961        | 1461.7584      | 731.3828         | 1460.7744      | 730.8908         | 14 |
| 12 | 1214.6263       | 607.8168        | 1197.5998      | 599.3035         | 1196.6157      | 598.8115         | T    | 1421.7635       | 711.3854        | 1404.7369      | 702.8721         | 1403.7529      | 702.3801         | 13 |
| 13 | 1343.6689       | 672.3381        | 1326.6424      | 663.8248         | 1325.6583      | 663.3328         | E    | 1320.7158       | 660.8615        | 1303.6892      | 652.3483         | 1302.7052      | 651.8563         | 12 |
| 14 | 1506.7322       | 753.8698        | 1489.7057      | 745.3565         | 1488.7217      | 744.8645         | Y    | 1191.6732       | 596.3402        | 1174.6467      | 587.8270         | 1173.6626      | 587.3350         | 11 |
| 15 | 1605.8006       | 803.4040        | 1588.7741      | 794.8907         | 1587.7901      | 794.3987         | V    | 1028.6099       | 514.8086        | 1011.5833      | 506.2953         | 1010.5993      | 505.8033         | 10 |
| 16 | 1704.8691       | 852.9382        | 1687.8425      | 844.4249         | 1686.8585      | 843.9329         | V    | <b>929.5415</b> | 465.2744        | 912.5149       | 456.7611         | 911.5309       | 456.2691         | 9  |
| 17 | 1791.9011       | 896.4542        | 1774.8745      | 887.9409         | 1773.8905      | 887.4489         | S    | <b>830.4730</b> | 415.7402        | 813.4465       | 407.2269         | 812.4625       | 406.7349         | 8  |

|    |           |           |           |           |           |           |   |          |          |          |          |  |  |   |
|----|-----------|-----------|-----------|-----------|-----------|-----------|---|----------|----------|----------|----------|--|--|---|
| 18 | 1904.9852 | 952.9962  | 1887.9586 | 944.4829  | 1886.9746 | 943.9909  | I | 743.4410 | 372.2241 | 726.4145 | 363.7109 |  |  | 7 |
| 19 | 2004.0536 | 1002.5304 | 1987.0270 | 994.0171  | 1986.0430 | 993.5251  | V | 630.3570 | 315.6821 | 613.3304 | 307.1688 |  |  | 6 |
| 20 | 2075.0907 | 1038.0490 | 2058.0641 | 1029.5357 | 2057.0801 | 1029.0437 | A | 531.2885 | 266.1479 | 514.2620 | 257.6346 |  |  | 5 |
| 21 | 2188.1747 | 1094.5910 | 2171.1482 | 1086.0777 | 2170.1642 | 1085.5857 | L | 460.2514 | 230.6293 | 443.2249 | 222.1161 |  |  | 4 |
| 22 | 2303.2017 | 1152.1045 | 2286.1751 | 1143.5912 | 2285.1911 | 1143.0992 | N | 347.1674 | 174.0873 | 330.1408 | 165.5740 |  |  | 3 |
| 23 | 2360.2232 | 1180.6152 | 2343.1966 | 1172.1019 | 2342.2126 | 1171.6099 | G | 232.1404 | 116.5738 | 215.1139 | 108.0606 |  |  | 2 |
| 24 |           |           |           |           |           |           | R | 175.1190 | 88.0631  | 158.0924 | 79.5498  |  |  | 1 |

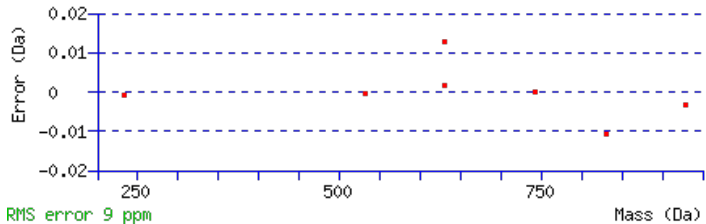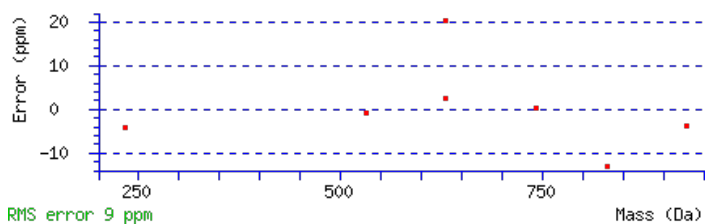

NCBI BLAST search of [NSITLTNLTPGTEYVVSIVALNGR](#)  
 (Parameters: blastp, nr protein database, expect=20000, no filter, PAM30)  
 Other BLAST [web gateways](#)

All matches to this query

| Score | Mr(calc)  | Delta   | Sequence                                 | Site Analysis             |
|-------|-----------|---------|------------------------------------------|---------------------------|
| 41.3  | 2533.3275 | -0.0017 | <a href="#">NSITLTNLTPGTEYVVSIVALNGR</a> | Deamidated N7, N22 50.00% |
| 41.3  | 2533.3275 | -0.0017 | <a href="#">NSITLTNLTPGTEYVVSIVALNGR</a> | Deamidated N1, N22 50.00% |
| 6.5   | 2533.3210 | 0.0048  | <a href="#">VIKPTSSNTAQGRFDTSPICK</a>    |                           |
| 6.5   | 2533.3210 | 0.0048  | <a href="#">VIKPTSSNTAQGRFDTSPICK</a>    |                           |
| 0.7   | 2533.3297 | -0.0039 | <a href="#">HCLTSIYRPFVDKALKQMGLR</a>    |                           |
| 0.1   | 2532.3114 | 1.0145  | <a href="#">DTILVCLDCCIKIVNLQGRK</a>     |                           |
| 0.1   | 2533.3362 | -0.0104 | <a href="#">LALRLYTCQEWAVVKVQAQVR</a>    |                           |

Mascot: <http://www.matrixscience.com/>

# Mascot Search Results

## Peptide View

MS/MS Fragmentation of **NSITLTNLTPGTEYVVSIVALNGR**

Found in **P02751** in **uni\_human\_nr**, FINC\_HUMAN Fibronectin OS=Homo sapiens GN=FN1 PE=1 SV=4

Match to Query 14847: 2532.342868 from(1267.178710,2+) intensity(3762859.2500) rtinseconds(3509) scans(24236) index(20118)

Title: 130809\_HPL\_Human\_Plaque\_BR1\_TR3\_02\_Spectrum044644\_scans\_24236\_RTINSECONDS=3509

Data file E:\\RAW\\HumanPlaques\\mgf\\T\\1D\\T130809\_HPL\_Human\_Plaque\_BR1\_TR3\_02.mgf

Click mouse within plot area to zoom in by factor of two about that point

Or,  to  Da

Label all possible matches  Label matches used for scoring

Show Y-axis

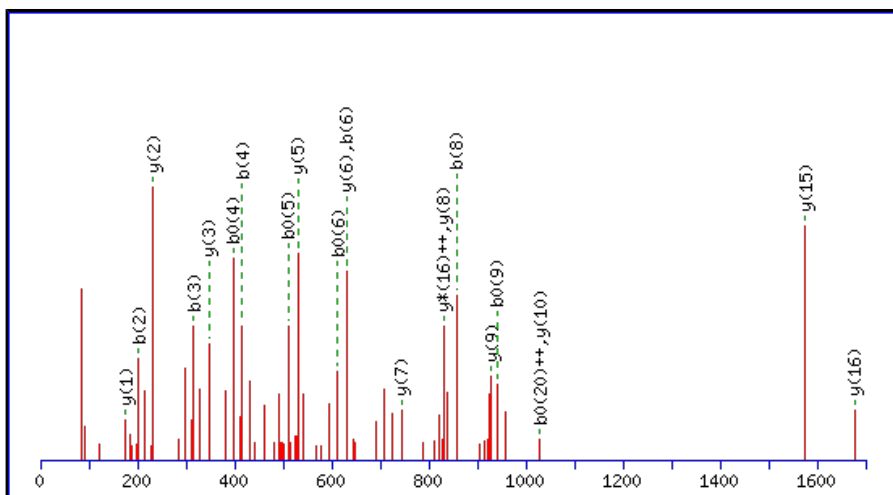

Monoisotopic mass of neutral peptide **Mr(calc)**: 2532.3435

Fixed modifications: Carbamidomethyl (C) (apply to specified residues or termini only)

Variable modifications:

N22 : Deamidated (NQ)

Ions Score: 99 Expect: 7.7e-009

Matches : 22/260 fragment ions using 21 most intense peaks ([help](#))

| #  | b               | b <sup>++</sup> | b <sup>*</sup> | b <sup>*++</sup> | b <sup>0</sup>  | b <sup>0++</sup> | Seq. | y                | y <sup>++</sup> | y <sup>*</sup> | y <sup>*++</sup> | y <sup>0</sup> | y <sup>0++</sup> | #  |
|----|-----------------|-----------------|----------------|------------------|-----------------|------------------|------|------------------|-----------------|----------------|------------------|----------------|------------------|----|
| 1  | 115.0502        | 58.0287         | 98.0237        | 49.5155          |                 |                  | N    |                  |                 |                |                  |                |                  | 24 |
| 2  | <b>202.0822</b> | 101.5448        | 185.0557       | 93.0315          | 184.0717        | 92.5395          | S    | 2419.3079        | 1210.1576       | 2402.2813      | 1201.6443        | 2401.2973      | 1201.1523        | 23 |
| 3  | <b>315.1663</b> | 158.0868        | 298.1397       | 149.5735         | 297.1557        | 149.0815         | I    | 2332.2759        | 1166.6416       | 2315.2493      | 1158.1283        | 2314.2653      | 1157.6363        | 22 |
| 4  | <b>416.2140</b> | 208.6106        | 399.1874       | 200.0974         | <b>398.2034</b> | 199.6053         | T    | 2219.1918        | 1110.0995       | 2202.1652      | 1101.5863        | 2201.1812      | 1101.0943        | 21 |
| 5  | 529.2980        | 265.1527        | 512.2715       | 256.6394         | <b>511.2875</b> | 256.1474         | L    | 2118.1441        | 1059.5757       | 2101.1176      | 1051.0624        | 2100.1335      | 1050.5704        | 20 |
| 6  | <b>630.3457</b> | 315.6765        | 613.3192       | 307.1632         | <b>612.3352</b> | 306.6712         | T    | 2005.0600        | 1003.0337       | 1988.0335      | 994.5204         | 1987.0495      | 994.0284         | 19 |
| 7  | 744.3886        | 372.6980        | 727.3621       | 364.1847         | 726.3781        | 363.6927         | N    | 1904.0124        | 952.5098        | 1886.9858      | 943.9965         | 1886.0018      | 943.5045         | 18 |
| 8  | <b>857.4727</b> | 429.2400        | 840.4462       | 420.7267         | 839.4621        | 420.2347         | L    | 1789.9694        | 895.4884        | 1772.9429      | 886.9751         | 1771.9589      | 886.4831         | 17 |
| 9  | 958.5204        | 479.7638        | 941.4938       | 471.2506         | <b>940.5098</b> | 470.7585         | T    | <b>1676.8854</b> | 838.9463        | 1659.8588      | <b>830.4331</b>  | 1658.8748      | 829.9410         | 16 |
| 10 | 1055.5732       | 528.2902        | 1038.5466      | 519.7769         | 1037.5626       | 519.2849         | P    | <b>1575.8377</b> | 788.4225        | 1558.8112      | 779.9092         | 1557.8271      | 779.4172         | 15 |
| 11 | 1112.5946       | 556.8009        | 1095.5681      | 548.2877         | 1094.5840       | 547.7957         | G    | 1478.7849        | 739.8961        | 1461.7584      | 731.3828         | 1460.7744      | 730.8908         | 14 |
| 12 | 1213.6423       | 607.3248        | 1196.6157      | 598.8115         | 1195.6317       | 598.3195         | T    | 1421.7635        | 711.3854        | 1404.7369      | 702.8721         | 1403.7529      | 702.3801         | 13 |
| 13 | 1342.6849       | 671.8461        | 1325.6583      | 663.3328         | 1324.6743       | 662.8408         | E    | 1320.7158        | 660.8615        | 1303.6892      | 652.3483         | 1302.7052      | 651.8563         | 12 |
| 14 | 1505.7482       | 753.3777        | 1488.7217      | 744.8645         | 1487.7377       | 744.3725         | Y    | 1191.6732        | 596.3402        | 1174.6467      | 587.8270         | 1173.6626      | 587.3350         | 11 |
| 15 | 1604.8166       | 802.9120        | 1587.7901      | 794.3987         | 1586.8061       | 793.9067         | V    | <b>1028.6099</b> | 514.8086        | 1011.5833      | 506.2953         | 1010.5993      | 505.8033         | 10 |
| 16 | 1703.8850       | 852.4462        | 1686.8585      | 843.9329         | 1685.8745       | 843.4409         | V    | <b>929.5415</b>  | 465.2744        | 912.5149       | 456.7611         | 911.5309       | 456.2691         | 9  |
| 17 | 1790.9171       | 895.9622        | 1773.8905      | 887.4489         | 1772.9065       | 886.9569         | S    | <b>830.4730</b>  | 415.7402        | 813.4465       | 407.2269         | 812.4625       | 406.7349         | 8  |
| 18 | 1904.0011       | 952.5042        | 1886.9746      | 943.9909         | 1885.9906       | 943.4989         | I    | <b>743.4410</b>  | 372.2241        | 726.4145       | 363.7109         |                |                  | 7  |

|    |           |           |           |           |           |           |   |          |          |          |          |  |  |   |
|----|-----------|-----------|-----------|-----------|-----------|-----------|---|----------|----------|----------|----------|--|--|---|
| 19 | 2003.0696 | 1002.0384 | 1986.0430 | 993.5251  | 1985.0590 | 993.0331  | V | 630.3570 | 315.6821 | 613.3304 | 307.1688 |  |  | 6 |
| 20 | 2074.1067 | 1037.5570 | 2057.0801 | 1029.0437 | 2056.0961 | 1028.5517 | A | 531.2885 | 266.1479 | 514.2620 | 257.6346 |  |  | 5 |
| 21 | 2187.1907 | 1094.0990 | 2170.1642 | 1085.5857 | 2169.1802 | 1085.0937 | L | 460.2514 | 230.6293 | 443.2249 | 222.1161 |  |  | 4 |
| 22 | 2302.2177 | 1151.6125 | 2285.1911 | 1143.0992 | 2284.2071 | 1142.6072 | N | 347.1674 | 174.0873 | 330.1408 | 165.5740 |  |  | 3 |
| 23 | 2359.2391 | 1180.1232 | 2342.2126 | 1171.6099 | 2341.2286 | 1171.1179 | G | 232.1404 | 116.5738 | 215.1139 | 108.0606 |  |  | 2 |
| 24 |           |           |           |           |           |           | R | 175.1190 | 88.0631  | 158.0924 | 79.5498  |  |  | 1 |

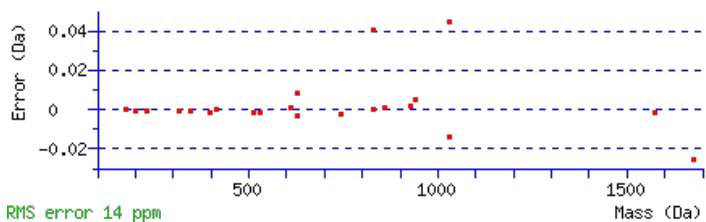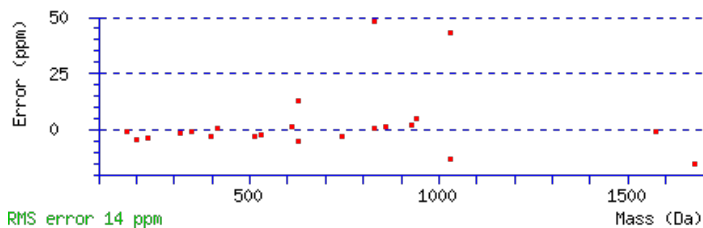

NCBI BLAST search of [NSITLTNLTPGTEYVVSIVALNGR](#)  
 (Parameters: blastp, nr protein database, expect=20000, no filter, PAM30)  
 Other BLAST [web gateways](#)

All matches to this query

| Score | Mr(calc)  | Delta   | Sequence                                    | Site Analysis          |
|-------|-----------|---------|---------------------------------------------|------------------------|
| 98.7  | 2532.3435 | -0.0007 | <a href="#">NSITLTNLTPGTEYVVSIVALNGR</a>    | Deamidated N22 100.00% |
| 10.0  | 2532.3435 | -0.0007 | <a href="#">NSITLTNLTPGTEYVVSIVALNGR</a>    | Deamidated N7 0.00%    |
| 3.3   | 2531.3344 | 1.0085  | <a href="#">SLLGDSAPTLHLNKGTPSQSPVVGR</a>   |                        |
| 0.7   | 2532.3408 | 0.0021  | <a href="#">ASRPAALGGPARAEQAATATAPADKAL</a> |                        |
| 0.6   | 2532.3522 | -0.0094 | <a href="#">LALRLYTCQEWAVVKVQAQVR</a>       |                        |
| 0.2   | 2532.3509 | -0.0080 | <a href="#">LEKFSSALQPGTLLDLLQVEGMK</a>     |                        |

Mascot: <http://www.matrixscience.com/>

# Mascot Search Results

## Peptide View

MS/MS Fragmentation of **NSITLTNLTTPGTEYVVSIVALNGR**

Found in **P02751** in **uni\_human\_nr**, FINC\_HUMAN Fibronectin OS=Homo sapiens GN=FN1 PE=1 SV=4

Match to Query 12758: 2532.342372 from(845.121400,3+) intensity(1041584.8750) rtinseconds(3517) scans(22032) index(17489)

Title: 130809\_HPL\_Human\_Plaque\_BR1\_TR3\_06\_Spectrum039843\_scans\_22032\_RTINSECONDS=3517

Data file E:\\RAW\\HumanPlaques\\imgf\\T\\1D\\T130809\_HPL\_Human\_Plaque\_BR1\_TR3\_06.mgf

Click mouse within plot area to zoom in by factor of two about that point

Or,  to  Da  
 Label all possible matches  Label matches used for scoring   
 Show Y-axis

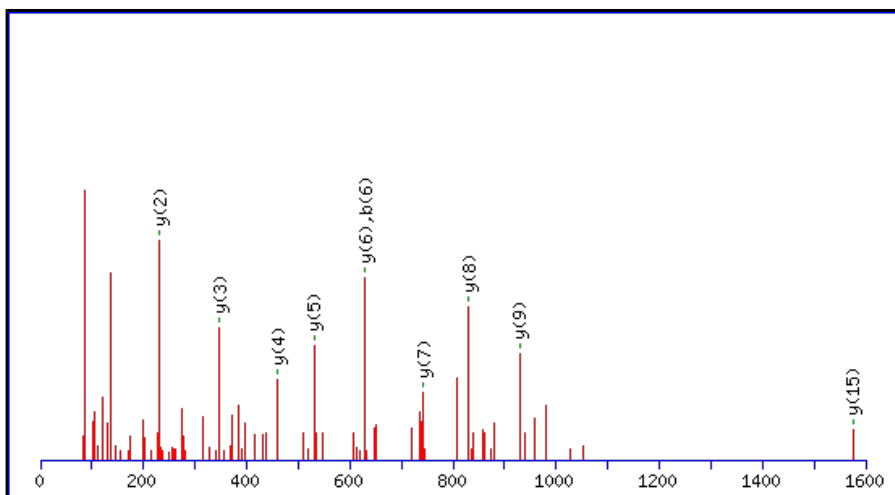

Monoisotopic mass of neutral peptide **Mr(calc):** 2532.3435

**Fixed modifications:** Carbamidomethyl (C) (apply to specified residues or termini only)

**Variable modifications:**

N22 : Deamidated (NQ)

**Ions Score:** 72 **Expect:** 3.9e-006

**Matches:** 10/260 fragment ions using 11 most intense peaks ([help](#))

| #  | b               | b <sup>++</sup> | b <sup>*</sup> | b <sup>*++</sup> | b <sup>0</sup> | b <sup>0++</sup> | Seq. | y                | y <sup>++</sup> | y <sup>*</sup> | y <sup>*++</sup> | y <sup>0</sup> | y <sup>0++</sup> | #  |
|----|-----------------|-----------------|----------------|------------------|----------------|------------------|------|------------------|-----------------|----------------|------------------|----------------|------------------|----|
| 1  | 115.0502        | 58.0287         | 98.0237        | 49.5155          |                |                  | N    |                  |                 |                |                  |                |                  | 24 |
| 2  | 202.0822        | 101.5448        | 185.0557       | 93.0315          | 184.0717       | 92.5395          | S    | 2419.3079        | 1210.1576       | 2402.2813      | 1201.6443        | 2401.2973      | 1201.1523        | 23 |
| 3  | 315.1663        | 158.0868        | 298.1397       | 149.5735         | 297.1557       | 149.0815         | I    | 2332.2759        | 1166.6416       | 2315.2493      | 1158.1283        | 2314.2653      | 1157.6363        | 22 |
| 4  | 416.2140        | 208.6106        | 399.1874       | 200.0974         | 398.2034       | 199.6053         | T    | 2219.1918        | 1110.0995       | 2202.1652      | 1101.5863        | 2201.1812      | 1101.0943        | 21 |
| 5  | 529.2980        | 265.1527        | 512.2715       | 256.6394         | 511.2875       | 256.1474         | L    | 2118.1441        | 1059.5757       | 2101.1176      | 1051.0624        | 2100.1335      | 1050.5704        | 20 |
| 6  | <b>630.3457</b> | 315.6765        | 613.3192       | 307.1632         | 612.3352       | 306.6712         | T    | 2005.0600        | 1003.0337       | 1988.0335      | 994.5204         | 1987.0495      | 994.0284         | 19 |
| 7  | 744.3886        | 372.6980        | 727.3621       | 364.1847         | 726.3781       | 363.6927         | N    | 1904.0124        | 952.5098        | 1886.9858      | 943.9965         | 1886.0018      | 943.5045         | 18 |
| 8  | 857.4727        | 429.2400        | 840.4462       | 420.7267         | 839.4621       | 420.2347         | L    | 1789.9694        | 895.4884        | 1772.9429      | 886.9751         | 1771.9589      | 886.4831         | 17 |
| 9  | 958.5204        | 479.7638        | 941.4938       | 471.2506         | 940.5098       | 470.7585         | T    | 1676.8854        | 838.9463        | 1659.8588      | 830.4331         | 1658.8748      | 829.9410         | 16 |
| 10 | 1055.5732       | 528.2902        | 1038.5466      | 519.7769         | 1037.5626      | 519.2849         | P    | <b>1575.8377</b> | 788.4225        | 1558.8112      | 779.9092         | 1557.8271      | 779.4172         | 15 |
| 11 | 1112.5946       | 556.8009        | 1095.5681      | 548.2877         | 1094.5840      | 547.7957         | G    | 1478.7849        | 739.8961        | 1461.7584      | 731.3828         | 1460.7744      | 730.8908         | 14 |
| 12 | 1213.6423       | 607.3248        | 1196.6157      | 598.8115         | 1195.6317      | 598.3195         | T    | 1421.7635        | 711.3854        | 1404.7369      | 702.8721         | 1403.7529      | 702.3801         | 13 |
| 13 | 1342.6849       | 671.8461        | 1325.6583      | 663.3328         | 1324.6743      | 662.8408         | E    | 1320.7158        | 660.8615        | 1303.6892      | 652.3483         | 1302.7052      | 651.8563         | 12 |
| 14 | 1505.7482       | 753.3777        | 1488.7217      | 744.8645         | 1487.7377      | 744.3725         | Y    | 1191.6732        | 596.3402        | 1174.6467      | 587.8270         | 1173.6626      | 587.3350         | 11 |
| 15 | 1604.8166       | 802.9120        | 1587.7901      | 794.3987         | 1586.8061      | 793.9067         | V    | 1028.6099        | 514.8086        | 1011.5833      | 506.2953         | 1010.5993      | 505.8033         | 10 |
| 16 | 1703.8850       | 852.4462        | 1686.8585      | 843.9329         | 1685.8745      | 843.4409         | V    | <b>929.5415</b>  | 465.2744        | 912.5149       | 456.7611         | 911.5309       | 456.2691         | 9  |
| 17 | 1790.9171       | 895.9622        | 1773.8905      | 887.4489         | 1772.9065      | 886.9569         | S    | <b>830.4730</b>  | 415.7402        | 813.4465       | 407.2269         | 812.4625       | 406.7349         | 8  |
| 18 | 1904.0011       | 952.5042        | 1886.9746      | 943.9909         | 1885.9906      | 943.4989         | I    | <b>743.4410</b>  | 372.2241        | 726.4145       | 363.7109         |                |                  | 7  |

|    |           |           |           |           |           |           |   |          |          |          |          |  |  |   |
|----|-----------|-----------|-----------|-----------|-----------|-----------|---|----------|----------|----------|----------|--|--|---|
| 19 | 2003.0696 | 1002.0384 | 1986.0430 | 993.5251  | 1985.0590 | 993.0331  | V | 630.3570 | 315.6821 | 613.3304 | 307.1688 |  |  | 6 |
| 20 | 2074.1067 | 1037.5570 | 2057.0801 | 1029.0437 | 2056.0961 | 1028.5517 | A | 531.2885 | 266.1479 | 514.2620 | 257.6346 |  |  | 5 |
| 21 | 2187.1907 | 1094.0990 | 2170.1642 | 1085.5857 | 2169.1802 | 1085.0937 | L | 460.2514 | 230.6293 | 443.2249 | 222.1161 |  |  | 4 |
| 22 | 2302.2177 | 1151.6125 | 2285.1911 | 1143.0992 | 2284.2071 | 1142.6072 | N | 347.1674 | 174.0873 | 330.1408 | 165.5740 |  |  | 3 |
| 23 | 2359.2391 | 1180.1232 | 2342.2126 | 1171.6099 | 2341.2286 | 1171.1179 | G | 232.1404 | 116.5738 | 215.1139 | 108.0606 |  |  | 2 |
| 24 |           |           |           |           |           |           | R | 175.1190 | 88.0631  | 158.0924 | 79.5498  |  |  | 1 |

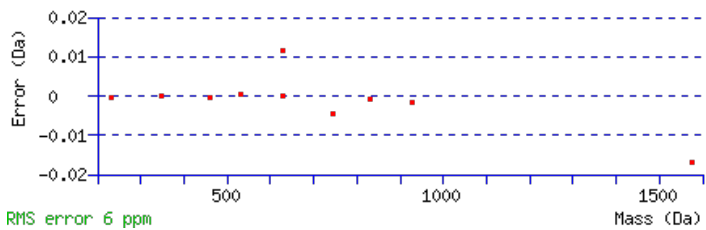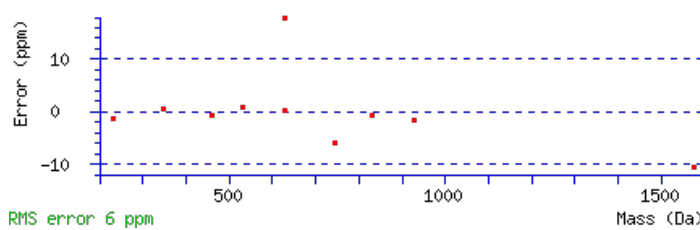

NCBI BLAST search of [NSITLTNLTPGTEYVVSIVALNGR](#)  
 (Parameters: blastp, nr protein database, expect=20000, no filter, PAM30)  
 Other BLAST [web gateways](#)

All matches to this query

| Score | Mr(calc)  | Delta   | Sequence                                 |
|-------|-----------|---------|------------------------------------------|
| 71.7  | 2532.3435 | -0.0011 | <a href="#">NSITLTNLTPGTEYVVSIVALNGR</a> |
| 0.5   | 2532.3370 | 0.0054  | <a href="#">VIKPTSSNTAQGRFDTSILPICK</a>  |

Mascot: <http://www.matrixscience.com/>

# Mascot Search Results

## Peptide View

MS/MS Fragmentation of **NSITLTNLTPGTEYVVSIVALNGR**

Found in **P02751** in **uni\_human\_nr**, FINC\_HUMAN Fibronectin OS=Homo sapiens GN=FN1 PE=1 SV=4

Match to Query 12550: 2532.343092 from(845.121640,3+) intensity(814495.3750) rtinseconds(3827) scans(23938) index(19028)

Title: 130801\_HPL\_Human\_Plaque\_BR2\_TR1\_05\_Spectrum041093\_scans\_23938\_RTINSECONDS=3827

Data file E:\\RAW\\HumanPlaques\\imgf\\T\\1D\\T130801\_HPL\_Human\_Plaque\_BR2\_TR1\_05.mgf

Click mouse within plot area to zoom in by factor of two about that point

Or, to Da  
 Label all possible matches Label matches used for scoring  
 Show Y-axis

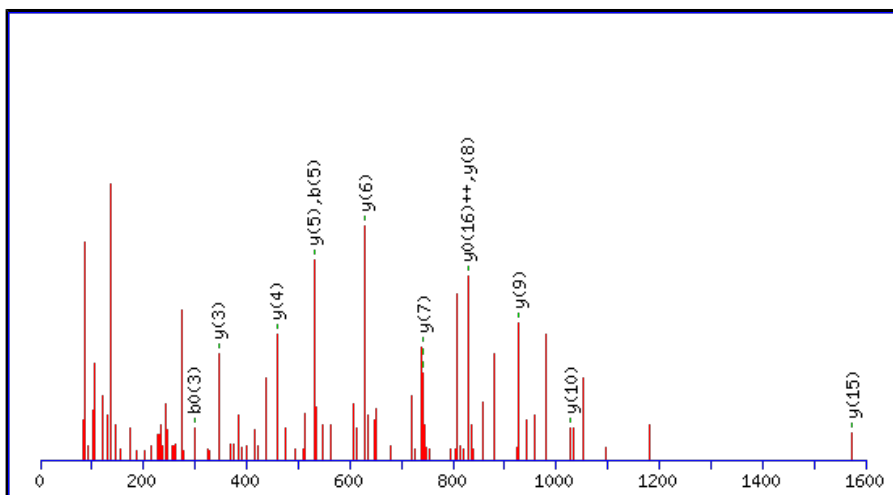

Monoisotopic mass of neutral peptide Mr(calc): 2532.3435

Fixed modifications: Carbamidomethyl (C) (apply to specified residues or termini only)

Variable modifications:

N1 : Deamidated (NQ)

Ions Score: 42 Expect: 0.0039

Matches : 12/260 fragment ions using 23 most intense peaks ([help](#))

| #  | b         | b <sup>++</sup> | b <sup>*</sup> | b <sup>*++</sup> | b <sup>0</sup> | b <sup>0++</sup> | Seq. | y         | y <sup>++</sup> | y <sup>*</sup> | y <sup>*++</sup> | y <sup>0</sup> | y <sup>0++</sup> | #  |
|----|-----------|-----------------|----------------|------------------|----------------|------------------|------|-----------|-----------------|----------------|------------------|----------------|------------------|----|
| 1  | 116.0342  | 58.5207         | 99.0077        | 50.0075          |                |                  | N    |           |                 |                |                  |                |                  | 24 |
| 2  | 203.0662  | 102.0368        | 186.0397       | 93.5235          | 185.0557       | 93.0315          | S    | 2418.3239 | 1209.6656       | 2401.2973      | 1201.1523        | 2400.3133      | 1200.6603        | 23 |
| 3  | 316.1503  | 158.5788        | 299.1238       | 150.0655         | 298.1397       | 149.5735         | I    | 2331.2918 | 1166.1496       | 2314.2653      | 1157.6363        | 2313.2813      | 1157.1443        | 22 |
| 4  | 417.1980  | 209.1026        | 400.1714       | 200.5894         | 399.1874       | 200.0974         | T    | 2218.2078 | 1109.6075       | 2201.1812      | 1101.0943        | 2200.1972      | 1100.6022        | 21 |
| 5  | 530.2821  | 265.6447        | 513.2555       | 257.1314         | 512.2715       | 256.6394         | L    | 2117.1601 | 1059.0837       | 2100.1335      | 1050.5704        | 2099.1495      | 1050.0784        | 20 |
| 6  | 631.3297  | 316.1685        | 614.3032       | 307.6552         | 613.3192       | 307.1632         | T    | 2004.0760 | 1002.5417       | 1987.0495      | 994.0284         | 1986.0655      | 993.5364         | 19 |
| 7  | 745.3727  | 373.1900        | 728.3461       | 364.6767         | 727.3621       | 364.1847         | N    | 1903.0284 | 952.0178        | 1886.0018      | 943.5045         | 1885.0178      | 943.0125         | 18 |
| 8  | 858.4567  | 429.7320        | 841.4302       | 421.2187         | 840.4462       | 420.7267         | L    | 1788.9854 | 894.9964        | 1771.9589      | 886.4831         | 1770.9749      | 885.9911         | 17 |
| 9  | 959.5044  | 480.2558        | 942.4779       | 471.7426         | 941.4938       | 471.2506         | T    | 1675.9014 | 838.4543        | 1658.8748      | 829.9410         | 1657.8908      | 829.4490         | 16 |
| 10 | 1056.5572 | 528.7822        | 1039.5306      | 520.2689         | 1038.5466      | 519.7769         | P    | 1574.8537 | 787.9305        | 1557.8271      | 779.4172         | 1556.8431      | 778.9252         | 15 |
| 11 | 1113.5786 | 557.2930        | 1096.5521      | 548.7797         | 1095.5681      | 548.2877         | G    | 1477.8009 | 739.4041        | 1460.7744      | 730.8908         | 1459.7904      | 730.3988         | 14 |
| 12 | 1214.6263 | 607.8168        | 1197.5998      | 599.3035         | 1196.6157      | 598.8115         | T    | 1420.7795 | 710.8934        | 1403.7529      | 702.3801         | 1402.7689      | 701.8881         | 13 |
| 13 | 1343.6689 | 672.3381        | 1326.6424      | 663.8248         | 1325.6583      | 663.3328         | E    | 1319.7318 | 660.3695        | 1302.7052      | 651.8563         | 1301.7212      | 651.3642         | 12 |
| 14 | 1506.7322 | 753.8698        | 1489.7057      | 745.3565         | 1488.7217      | 744.8645         | Y    | 1190.6892 | 595.8482        | 1173.6626      | 587.3350         | 1172.6786      | 586.8429         | 11 |
| 15 | 1605.8006 | 803.4040        | 1588.7741      | 794.8907         | 1587.7901      | 794.3987         | V    | 1027.6259 | 514.3166        | 1010.5993      | 505.8033         | 1009.6153      | 505.3113         | 10 |
| 16 | 1704.8691 | 852.9382        | 1687.8425      | 844.4249         | 1686.8585      | 843.9329         | V    | 928.5574  | 464.7824        | 911.5309       | 456.2691         | 910.5469       | 455.7771         | 9  |
| 17 | 1791.9011 | 896.4542        | 1774.8745      | 887.9409         | 1773.8905      | 887.4489         | S    | 829.4890  | 415.2482        | 812.4625       | 406.7349         | 811.4785       | 406.2429         | 8  |
| 18 | 1904.9852 | 952.9962        | 1887.9586      | 944.4829         | 1886.9746      | 943.9909         | I    | 742.4570  | 371.7321        | 725.4305       | 363.2189         |                |                  | 7  |



|    |           |           |           |           |           |           |   |          |          |          |          |  |  |   |
|----|-----------|-----------|-----------|-----------|-----------|-----------|---|----------|----------|----------|----------|--|--|---|
| 19 | 2004.0536 | 1002.5304 | 1987.0270 | 994.0171  | 1986.0430 | 993.5251  | V | 629.3729 | 315.1901 | 612.3464 | 306.6768 |  |  | 6 |
| 20 | 2075.0907 | 1038.0490 | 2058.0641 | 1029.5357 | 2057.0801 | 1029.0437 | A | 530.3045 | 265.6559 | 513.2780 | 257.1426 |  |  | 5 |
| 21 | 2188.1747 | 1094.5910 | 2171.1482 | 1086.0777 | 2170.1642 | 1085.5857 | L | 459.2674 | 230.1373 | 442.2409 | 221.6241 |  |  | 4 |
| 22 | 2302.2177 | 1151.6125 | 2285.1911 | 1143.0992 | 2284.2071 | 1142.6072 | N | 346.1833 | 173.5953 | 329.1568 | 165.0820 |  |  | 3 |
| 23 | 2359.2391 | 1180.1232 | 2342.2126 | 1171.6099 | 2341.2286 | 1171.1179 | G | 232.1404 | 116.5738 | 215.1139 | 108.0606 |  |  | 2 |
| 24 |           |           |           |           |           |           | R | 175.1190 | 88.0631  | 158.0924 | 79.5498  |  |  | 1 |

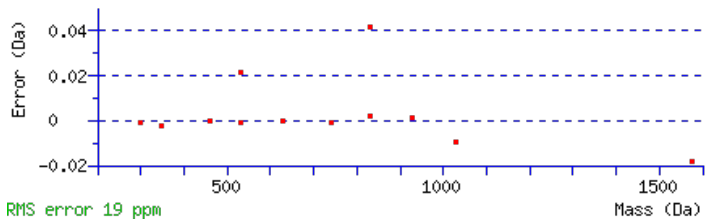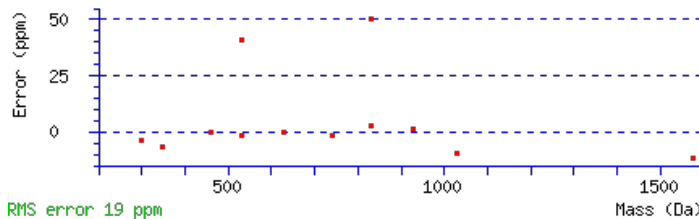

NCBI BLAST search of [NSITLTNLTPGTEYVVSIVALNGR](#)  
 (Parameters: blastp, nr protein database, expect=20000, no filter, PAM30)  
 Other BLAST [web gateways](#)

All matches to this query

| Score | Mr(calc)  | Delta   | Sequence                                 | Site Analysis        |
|-------|-----------|---------|------------------------------------------|----------------------|
| 41.6  | 2532.3435 | -0.0004 | <a href="#">NSITLTNLTPGTEYVVSIVALNGR</a> | Deamidated N1 50.06% |
| 39.1  | 2532.3435 | -0.0004 | <a href="#">NSITLTNLTPGTEYVVSIVALNGR</a> | Deamidated N7 27.83% |

Mascot: <http://www.matrixscience.com/>

# Mascot Search Results

## Peptide View

MS/MS Fragmentation of **NSITLTNLTTPGTEYVVSIVALNGR**

Found in **P02751** in **uni\_human\_nr**, FINC\_HUMAN Fibronectin OS=Homo sapiens GN=FN1 PE=1 SV=4

Match to Query 12550: 2532.343092 from(845.121640,3+) intensity(814495.3750) rtinseconds(3827) scans(23938) index(19028)

Title: 130801\_HPL\_Human\_Plaque\_BR2\_TR1\_05\_Spectrum041093\_scans\_23938\_RTINSECONDS=3827

Data file E:\\RAW\\HumanPlaques\\imgf\\T\\1D\\T130801\_HPL\_Human\_Plaque\_BR2\_TR1\_05.mgf

Click mouse within plot area to zoom in by factor of two about that point

Or,  to  Da  
 Label all possible matches  Label matches used for scoring   
 Show Y-axis

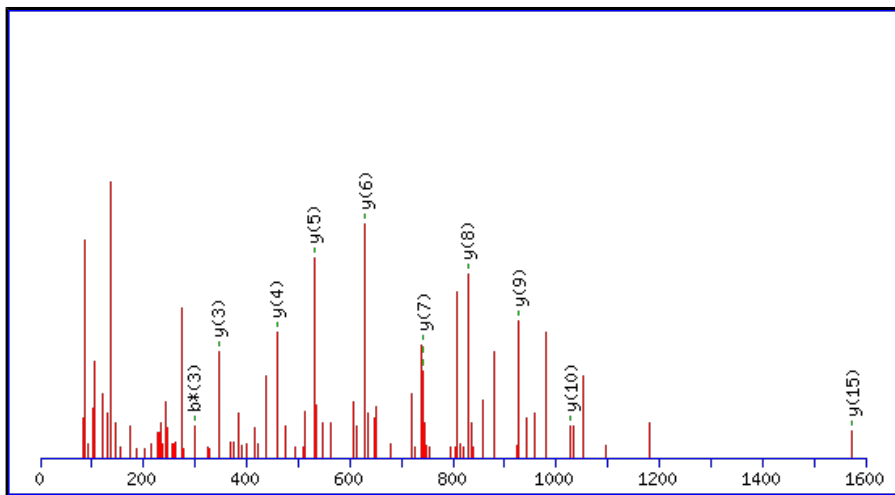

Monoisotopic mass of neutral peptide **Mr(calc): 2532.3435**

**Fixed modifications:** Carbamidomethyl (C) (apply to specified residues or termini only)

**Variable modifications:**

N7 : Deamidated (NQ)

**Ions Score:** 39 **Expect:** 0.0071

**Matches :** 10/260 fragment ions using 23 most intense peaks ([help](#))

| #  | b         | b <sup>++</sup> | b <sup>*</sup> | b <sup>***</sup> | b <sup>0</sup> | b <sup>0++</sup> | Seq. | y         | y <sup>++</sup> | y <sup>*</sup> | y <sup>***</sup> | y <sup>0</sup> | y <sup>0++</sup> | #  |
|----|-----------|-----------------|----------------|------------------|----------------|------------------|------|-----------|-----------------|----------------|------------------|----------------|------------------|----|
| 1  | 115.0502  | 58.0287         | 98.0237        | 49.5155          |                |                  | N    |           |                 |                |                  |                |                  | 24 |
| 2  | 202.0822  | 101.5448        | 185.0557       | 93.0315          | 184.0717       | 92.5395          | S    | 2419.3079 | 1210.1576       | 2402.2813      | 1201.6443        | 2401.2973      | 1201.1523        | 23 |
| 3  | 315.1663  | 158.0868        | 298.1397       | 149.5735         | 297.1557       | 149.0815         | I    | 2332.2759 | 1166.6416       | 2315.2493      | 1158.1283        | 2314.2653      | 1157.6363        | 22 |
| 4  | 416.2140  | 208.6106        | 399.1874       | 200.0974         | 398.2034       | 199.6053         | T    | 2219.1918 | 1110.0995       | 2202.1652      | 1101.5863        | 2201.1812      | 1101.0943        | 21 |
| 5  | 529.2980  | 265.1527        | 512.2715       | 256.6394         | 511.2875       | 256.1474         | L    | 2118.1441 | 1059.5757       | 2101.1176      | 1051.0624        | 2100.1335      | 1050.5704        | 20 |
| 6  | 630.3457  | 315.6765        | 613.3192       | 307.1632         | 612.3352       | 306.6712         | T    | 2005.0600 | 1003.0337       | 1988.0335      | 994.5204         | 1987.0495      | 994.0284         | 19 |
| 7  | 745.3727  | 373.1900        | 728.3461       | 364.6767         | 727.3621       | 364.1847         | N    | 1904.0124 | 952.5098        | 1886.9858      | 943.9965         | 1886.0018      | 943.5045         | 18 |
| 8  | 858.4567  | 429.7320        | 841.4302       | 421.2187         | 840.4462       | 420.7267         | L    | 1788.9854 | 894.9964        | 1771.9589      | 886.4831         | 1770.9749      | 885.9911         | 17 |
| 9  | 959.5044  | 480.2558        | 942.4779       | 471.7426         | 941.4938       | 471.2506         | T    | 1675.9014 | 838.4543        | 1658.8748      | 829.9410         | 1657.8908      | 829.4490         | 16 |
| 10 | 1056.5572 | 528.7822        | 1039.5306      | 520.2689         | 1038.5466      | 519.7769         | P    | 1574.8537 | 787.9305        | 1557.8271      | 779.4172         | 1556.8431      | 778.9252         | 15 |
| 11 | 1113.5786 | 557.2930        | 1096.5521      | 548.7797         | 1095.5681      | 548.2877         | G    | 1477.8009 | 739.4041        | 1460.7744      | 730.8908         | 1459.7904      | 730.3988         | 14 |
| 12 | 1214.6263 | 607.8168        | 1197.5998      | 599.3035         | 1196.6157      | 598.8115         | T    | 1420.7795 | 710.8934        | 1403.7529      | 702.3801         | 1402.7689      | 701.8881         | 13 |
| 13 | 1343.6689 | 672.3381        | 1326.6424      | 663.8248         | 1325.6583      | 663.3328         | E    | 1319.7318 | 660.3695        | 1302.7052      | 651.8563         | 1301.7212      | 651.3642         | 12 |
| 14 | 1506.7322 | 753.8698        | 1489.7057      | 745.3565         | 1488.7217      | 744.8645         | Y    | 1190.6892 | 595.8482        | 1173.6626      | 587.3350         | 1172.6786      | 586.8429         | 11 |
| 15 | 1605.8006 | 803.4040        | 1588.7741      | 794.8907         | 1587.7901      | 794.3987         | V    | 1027.6259 | 514.3166        | 1010.5993      | 505.8033         | 1009.6153      | 505.3113         | 10 |
| 16 | 1704.8691 | 852.9382        | 1687.8425      | 844.4249         | 1686.8585      | 843.9329         | V    | 928.5574  | 464.7824        | 911.5309       | 456.2691         | 910.5469       | 455.7771         | 9  |
| 17 | 1791.9011 | 896.4542        | 1774.8745      | 887.9409         | 1773.8905      | 887.4489         | S    | 829.4890  | 415.2482        | 812.4625       | 406.7349         | 811.4785       | 406.2429         | 8  |
| 18 | 1904.9852 | 952.9962        | 1887.9586      | 944.4829         | 1886.9746      | 943.9909         | I    | 742.4570  | 371.7321        | 725.4305       | 363.2189         |                |                  | 7  |

|    |           |           |           |           |           |           |   |          |          |          |          |  |  |   |
|----|-----------|-----------|-----------|-----------|-----------|-----------|---|----------|----------|----------|----------|--|--|---|
| 19 | 2004.0536 | 1002.5304 | 1987.0270 | 994.0171  | 1986.0430 | 993.5251  | V | 629.3729 | 315.1901 | 612.3464 | 306.6768 |  |  | 6 |
| 20 | 2075.0907 | 1038.0490 | 2058.0641 | 1029.5357 | 2057.0801 | 1029.0437 | A | 530.3045 | 265.6559 | 513.2780 | 257.1426 |  |  | 5 |
| 21 | 2188.1747 | 1094.5910 | 2171.1482 | 1086.0777 | 2170.1642 | 1085.5857 | L | 459.2674 | 230.1373 | 442.2409 | 221.6241 |  |  | 4 |
| 22 | 2302.2177 | 1151.6125 | 2285.1911 | 1143.0992 | 2284.2071 | 1142.6072 | N | 346.1833 | 173.5953 | 329.1568 | 165.0820 |  |  | 3 |
| 23 | 2359.2391 | 1180.1232 | 2342.2126 | 1171.6099 | 2341.2286 | 1171.1179 | G | 232.1404 | 116.5738 | 215.1139 | 108.0606 |  |  | 2 |
| 24 |           |           |           |           |           |           | R | 175.1190 | 88.0631  | 158.0924 | 79.5498  |  |  | 1 |

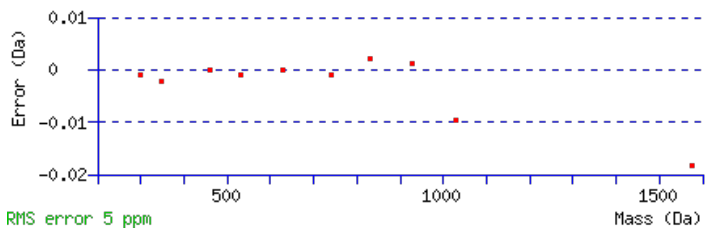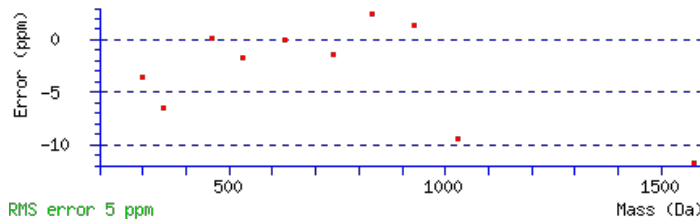

NCBI BLAST search of [NSITLTNLTPGTEYVVSIVALNGR](#)  
 (Parameters: blastp, nr protein database, expect=20000, no filter, PAM30)  
 Other BLAST [web gateways](#)

All matches to this query

| Score | Mr(calc)  | Delta   | Sequence                                 | Site Analysis        |
|-------|-----------|---------|------------------------------------------|----------------------|
| 39.1  | 2532.3435 | -0.0004 | <a href="#">NSITLTNLTPGTEYVVSIVALNGR</a> | Deamidated N7 35.79% |
| 39.1  | 2532.3435 | -0.0004 | <a href="#">NSITLTNLTPGTEYVVSIVALNGR</a> | Deamidated N1 35.79% |

Mascot: <http://www.matrixscience.com/>

# Mascot Search Results

## Peptide View

MS/MS Fragmentation of **NSITLTNLTPGTEYVVSIVALNGR**

Found in **P02751** in **uni\_human\_nr**, FINC\_HUMAN Fibronectin OS=Homo sapiens GN=FN1 PE=1 SV=4

Match to Query 14719: 2531.360208 from(1266.687380,2+) intensity(10694606.0000) rtinseconds(3420) scans(23631) index(19605)

Title: 130806\_HPL\_Human\_Plaque\_BR1\_TR2\_02\_Spectrum044309\_scans\_23631\_RTINSECONDS=3420

Data file E:\\RAW\\HumanPlaques\\imgf\\T\\1D\\T130806\_HPL\_Human\_Plaque\_BR1\_TR2\_02.mgf

Click mouse within plot area to zoom in by factor of two about that point

Or, to Da  
 Label all possible matches      Label matches used for scoring  
 Show Y-axis

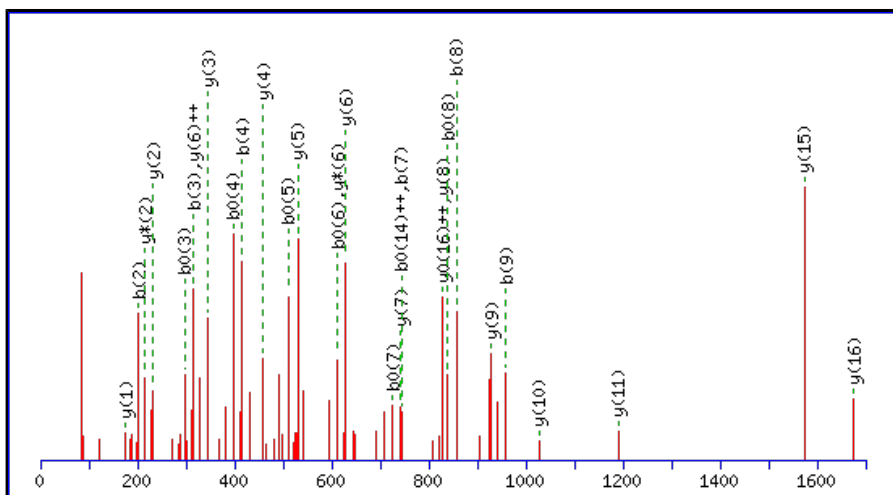

Monoisotopic mass of neutral peptide **Mr(calc):** 2531.3595

Fixed modifications: Carbamidomethyl (C) (apply to specified residues or termini only)

Ions Score: 113    Expect: 2.2e-010

Matches : 30/260 fragment ions using 32 most intense peaks    ([help](#))

| #  | b               | b <sup>++</sup> | b <sup>*</sup> | b <sup>*++</sup> | b <sup>0</sup>  | b <sup>0++</sup> | Seq. | y                | y <sup>++</sup> | y <sup>*</sup>  | y <sup>*++</sup> | y <sup>0</sup> | y <sup>0++</sup> | #  |
|----|-----------------|-----------------|----------------|------------------|-----------------|------------------|------|------------------|-----------------|-----------------|------------------|----------------|------------------|----|
| 1  | 115.0502        | 58.0287         | 98.0237        | 49.5155          |                 |                  | N    |                  |                 |                 |                  |                |                  | 24 |
| 2  | <b>202.0822</b> | 101.5448        | 185.0557       | 93.0315          | 184.0717        | 92.5395          | S    | 2418.3239        | 1209.6656       | 2401.2973       | 1201.1523        | 2400.3133      | 1200.6603        | 23 |
| 3  | <b>315.1663</b> | 158.0868        | 298.1397       | 149.5735         | <b>297.1557</b> | 149.0815         | I    | 2331.2918        | 1166.1496       | 2314.2653       | 1157.6363        | 2313.2813      | 1157.1443        | 22 |
| 4  | <b>416.2140</b> | 208.6106        | 399.1874       | 200.0974         | <b>398.2034</b> | 199.6053         | T    | 2218.2078        | 1109.6075       | 2201.1812       | 1101.0943        | 2200.1972      | 1100.6022        | 21 |
| 5  | 529.2980        | 265.1527        | 512.2715       | 256.6394         | <b>511.2875</b> | 256.1474         | L    | 2117.1601        | 1059.0837       | 2100.1335       | 1050.5704        | 2099.1495      | 1050.0784        | 20 |
| 6  | 630.3457        | 315.6765        | 613.3192       | 307.1632         | <b>612.3352</b> | 306.6712         | T    | 2004.0760        | 1002.5417       | 1987.0495       | 994.0284         | 1986.0655      | 993.5364         | 19 |
| 7  | <b>744.3886</b> | 372.6980        | 727.3621       | 364.1847         | <b>726.3781</b> | 363.6927         | N    | 1903.0284        | 952.0178        | 1886.0018       | 943.5045         | 1885.0178      | 943.0125         | 18 |
| 8  | <b>857.4727</b> | 429.2400        | 840.4462       | 420.7267         | <b>839.4621</b> | 420.2347         | L    | 1788.9854        | 894.9964        | 1771.9589       | 886.4831         | 1770.9749      | 885.9911         | 17 |
| 9  | <b>958.5204</b> | 479.7638        | 941.4938       | 471.2506         | 940.5098        | 470.7585         | T    | <b>1675.9014</b> | 838.4543        | 1658.8748       | 829.9410         | 1657.8908      | <b>829.4490</b>  | 16 |
| 10 | 1055.5732       | 528.2902        | 1038.5466      | 519.7769         | 1037.5626       | 519.2849         | P    | <b>1574.8537</b> | 787.9305        | 1557.8271       | 779.4172         | 1556.8431      | 778.9252         | 15 |
| 11 | 1112.5946       | 556.8009        | 1095.5681      | 548.2877         | 1094.5840       | 547.7957         | G    | 1477.8009        | 739.4041        | 1460.7744       | 730.8908         | 1459.7904      | 730.3988         | 14 |
| 12 | 1213.6423       | 607.3248        | 1196.6157      | 598.8115         | 1195.6317       | 598.3195         | T    | 1420.7795        | 710.8934        | 1403.7529       | 702.3801         | 1402.7689      | 701.8881         | 13 |
| 13 | 1342.6849       | 671.8461        | 1325.6583      | 663.3328         | 1324.6743       | 662.8408         | E    | 1319.7318        | 660.3695        | 1302.7052       | 651.8563         | 1301.7212      | 651.3642         | 12 |
| 14 | 1505.7482       | 753.3777        | 1488.7217      | 744.8645         | 1487.7377       | <b>744.3725</b>  | Y    | <b>1190.6892</b> | 595.8482        | 1173.6626       | 587.3350         | 1172.6786      | 586.8429         | 11 |
| 15 | 1604.8166       | 802.9120        | 1587.7901      | 794.3987         | 1586.8061       | 793.9067         | V    | <b>1027.6259</b> | 514.3166        | 1010.5993       | 505.8033         | 1009.6153      | 505.3113         | 10 |
| 16 | 1703.8850       | 852.4462        | 1686.8585      | 843.9329         | 1685.8745       | 843.4409         | V    | <b>928.5574</b>  | 464.7824        | 911.5309        | 456.2691         | 910.5469       | 455.7771         | 9  |
| 17 | 1790.9171       | 895.9622        | 1773.8905      | 887.4489         | 1772.9065       | 886.9569         | S    | <b>829.4890</b>  | 415.2482        | 812.4625        | 406.7349         | 811.4785       | 406.2429         | 8  |
| 18 | 1904.0011       | 952.5042        | 1886.9746      | 943.9909         | 1885.9906       | 943.4989         | I    | <b>742.4570</b>  | 371.7321        | 725.4305        | 363.2189         |                |                  | 7  |
| 19 | 2003.0696       | 1002.0384       | 1986.0430      | 993.5251         | 1985.0590       | 993.0331         | V    | <b>629.3729</b>  | <b>315.1901</b> | <b>612.3464</b> | 306.6768         |                |                  | 6  |

|    |           |           |           |           |           |           |   |          |          |          |          |  |  |   |
|----|-----------|-----------|-----------|-----------|-----------|-----------|---|----------|----------|----------|----------|--|--|---|
| 20 | 2074.1067 | 1037.5570 | 2057.0801 | 1029.0437 | 2056.0961 | 1028.5517 | A | 530.3045 | 265.6559 | 513.2780 | 257.1426 |  |  | 5 |
| 21 | 2187.1907 | 1094.0990 | 2170.1642 | 1085.5857 | 2169.1802 | 1085.0937 | L | 459.2674 | 230.1373 | 442.2409 | 221.6241 |  |  | 4 |
| 22 | 2301.2337 | 1151.1205 | 2284.2071 | 1142.6072 | 2283.2231 | 1142.1152 | N | 346.1833 | 173.5953 | 329.1568 | 165.0820 |  |  | 3 |
| 23 | 2358.2551 | 1179.6312 | 2341.2286 | 1171.1179 | 2340.2446 | 1170.6259 | G | 232.1404 | 116.5738 | 215.1139 | 108.0606 |  |  | 2 |
| 24 |           |           |           |           |           |           | R | 175.1190 | 88.0631  | 158.0924 | 79.5498  |  |  | 1 |

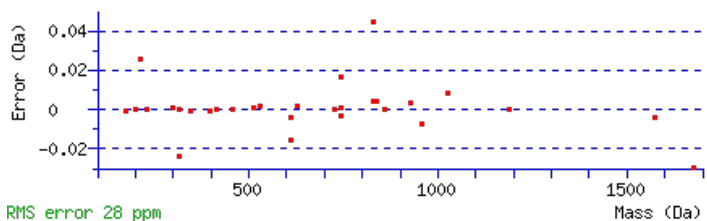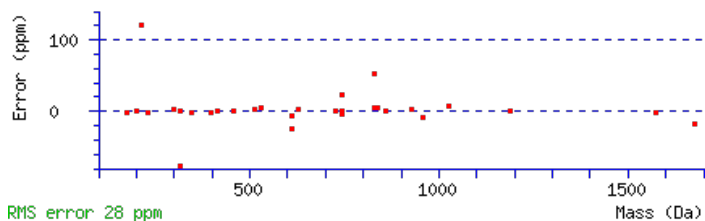

NCBI **BLAST** search of [NSITLTNLTPGTEYVVSIVALNGR](#)  
 (Parameters: blastp, nr protein database, expect=20000, no filter, PAM30)  
 Other BLAST [web gateways](#)

**All matches to this query**

| Score | Mr(calc)  | Delta   | Sequence                                 |
|-------|-----------|---------|------------------------------------------|
| 112.8 | 2531.3595 | 0.0007  | <a href="#">NSITLTNLTPGTEYVVSIVALNGR</a> |
| 0.5   | 2531.3682 | -0.0080 | <a href="#">LALRLYTCQEWAVVKVQAQVR</a>    |

Mascot: <http://www.matrixscience.com/>

# Mascot Search Results

## Peptide View

MS/MS Fragmentation of **NSITLTNLTTPGTEYVVSIVALNGR**

Found in **P02751** in **uni\_human\_nr**, FINC\_HUMAN Fibronectin OS=Homo sapiens GN=FN1 PE=1 SV=4

Match to Query 14840: 2531.359452 from(844.793760,3+) intensity(22561322.0000) rtinseconds(3435) scans(23689) index(19659)

Title: 130809\_HPL\_Human\_Plaque\_BR1\_TR3\_02\_Spectrum044185\_scans\_23689\_RTINSECONDS=3435

Data file E:\\RAW\\HumanPlaques\\imgf\\T\\1D\\T130809\_HPL\_Human\_Plaque\_BR1\_TR3\_02.mgf

Click mouse within plot area to zoom in by factor of two about that point

Or, to Da  
 Label all possible matches Label matches used for scoring  
 Show Y-axis

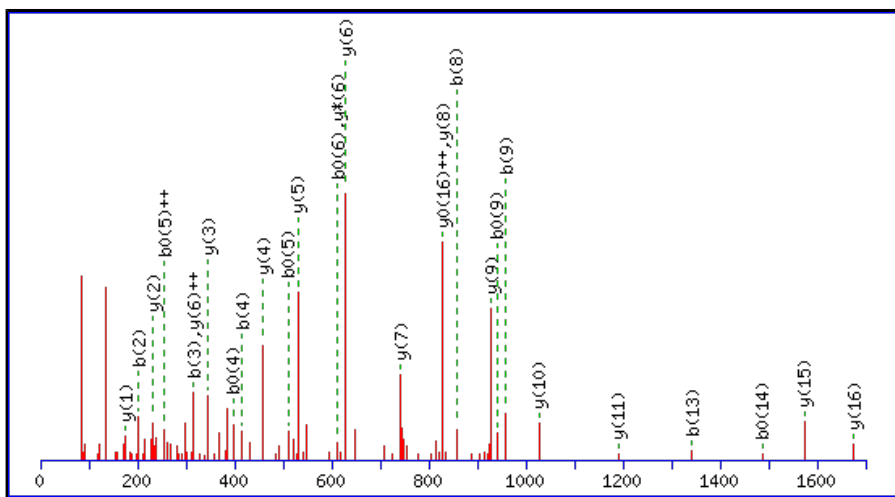

Monoisotopic mass of neutral peptide **Mr(calc)**: 2531.3595

Fixed modifications: Carbamidomethyl (C) (apply to specified residues or termini only)

Ions Score: 103 Expect: 2e-009

Matches : 28/260 fragment ions using 34 most intense peaks ([help](#))

| #  | b                | b <sup>++</sup> | b*        | b <sup>***</sup> | b <sup>0</sup>   | b <sup>0++</sup> | Seq. | y                | y <sup>++</sup> | y*              | y <sup>***</sup> | y <sup>0</sup> | y <sup>0++</sup> | #  |
|----|------------------|-----------------|-----------|------------------|------------------|------------------|------|------------------|-----------------|-----------------|------------------|----------------|------------------|----|
| 1  | 115.0502         | 58.0287         | 98.0237   | 49.5155          |                  |                  | N    |                  |                 |                 |                  |                |                  | 24 |
| 2  | <b>202.0822</b>  | 101.5448        | 185.0557  | 93.0315          | 184.0717         | 92.5395          | S    | 2418.3239        | 1209.6656       | 2401.2973       | 1201.1523        | 2400.3133      | 1200.6603        | 23 |
| 3  | <b>315.1663</b>  | 158.0868        | 298.1397  | 149.5735         | 297.1557         | 149.0815         | I    | 2331.2918        | 1166.1496       | 2314.2653       | 1157.6363        | 2313.2813      | 1157.1443        | 22 |
| 4  | <b>416.2140</b>  | 208.6106        | 399.1874  | 200.0974         | <b>398.2034</b>  | 199.6053         | T    | 2218.2078        | 1109.6075       | 2201.1812       | 1101.0943        | 2200.1972      | 1100.6022        | 21 |
| 5  | 529.2980         | 265.1527        | 512.2715  | 256.6394         | <b>511.2875</b>  | <b>256.1474</b>  | L    | 2117.1601        | 1059.0837       | 2100.1335       | 1050.5704        | 2099.1495      | 1050.0784        | 20 |
| 6  | 630.3457         | 315.6765        | 613.3192  | 307.1632         | <b>612.3352</b>  | 306.6712         | T    | 2004.0760        | 1002.5417       | 1987.0495       | 994.0284         | 1986.0655      | 993.5364         | 19 |
| 7  | 744.3886         | 372.6980        | 727.3621  | 364.1847         | 726.3781         | 363.6927         | N    | 1903.0284        | 952.0178        | 1886.0018       | 943.5045         | 1885.0178      | 943.0125         | 18 |
| 8  | <b>857.4727</b>  | 429.2400        | 840.4462  | 420.7267         | 839.4621         | 420.2347         | L    | 1788.9854        | 894.9964        | 1771.9589       | 886.4831         | 1770.9749      | 885.9911         | 17 |
| 9  | <b>958.5204</b>  | 479.7638        | 941.4938  | 471.2506         | <b>940.5098</b>  | 470.7585         | T    | <b>1675.9014</b> | 838.4543        | 1658.8748       | 829.9410         | 1657.8908      | <b>829.4490</b>  | 16 |
| 10 | 1055.5732        | 528.2902        | 1038.5466 | 519.7769         | 1037.5626        | 519.2849         | P    | <b>1574.8537</b> | 787.9305        | 1557.8271       | 779.4172         | 1556.8431      | 778.9252         | 15 |
| 11 | 1112.5946        | 556.8009        | 1095.5681 | 548.2877         | 1094.5840        | 547.7957         | G    | 1477.8009        | 739.4041        | 1460.7744       | 730.8908         | 1459.7904      | 730.3988         | 14 |
| 12 | 1213.6423        | 607.3248        | 1196.6157 | 598.8115         | 1195.6317        | 598.3195         | T    | 1420.7795        | 710.8934        | 1403.7529       | 702.3801         | 1402.7689      | 701.8881         | 13 |
| 13 | <b>1342.6849</b> | 671.8461        | 1325.6583 | 663.3328         | 1324.6743        | 662.8408         | E    | 1319.7318        | 660.3695        | 1302.7052       | 651.8563         | 1301.7212      | 651.3642         | 12 |
| 14 | 1505.7482        | 753.3777        | 1488.7217 | 744.8645         | <b>1487.7377</b> | 744.3725         | Y    | <b>1190.6892</b> | 595.8482        | 1173.6626       | 587.3350         | 1172.6786      | 586.8429         | 11 |
| 15 | 1604.8166        | 802.9120        | 1587.7901 | 794.3987         | 1586.8061        | 793.9067         | V    | <b>1027.6259</b> | 514.3166        | 1010.5993       | 505.8033         | 1009.6153      | 505.3113         | 10 |
| 16 | 1703.8850        | 852.4462        | 1686.8585 | 843.9329         | 1685.8745        | 843.4409         | V    | <b>928.5574</b>  | 464.7824        | 911.5309        | 456.2691         | 910.5469       | 455.7771         | 9  |
| 17 | 1790.9171        | 895.9622        | 1773.8905 | 887.4489         | 1772.9065        | 886.9569         | S    | <b>829.4890</b>  | 415.2482        | 812.4625        | 406.7349         | 811.4785       | 406.2429         | 8  |
| 18 | 1904.0011        | 952.5042        | 1886.9746 | 943.9909         | 1885.9906        | 943.4989         | I    | <b>742.4570</b>  | 371.7321        | 725.4305        | 363.2189         |                |                  | 7  |
| 19 | 2003.0696        | 1002.0384       | 1986.0430 | 993.5251         | 1985.0590        | 993.0331         | V    | <b>629.3729</b>  | <b>315.1901</b> | <b>612.3464</b> | 306.6768         |                |                  | 6  |

|    |           |           |           |           |           |           |   |          |          |          |          |  |  |   |
|----|-----------|-----------|-----------|-----------|-----------|-----------|---|----------|----------|----------|----------|--|--|---|
| 20 | 2074.1067 | 1037.5570 | 2057.0801 | 1029.0437 | 2056.0961 | 1028.5517 | A | 530.3045 | 265.6559 | 513.2780 | 257.1426 |  |  | 5 |
| 21 | 2187.1907 | 1094.0990 | 2170.1642 | 1085.5857 | 2169.1802 | 1085.0937 | L | 459.2674 | 230.1373 | 442.2409 | 221.6241 |  |  | 4 |
| 22 | 2301.2337 | 1151.1205 | 2284.2071 | 1142.6072 | 2283.2231 | 1142.1152 | N | 346.1833 | 173.5953 | 329.1568 | 165.0820 |  |  | 3 |
| 23 | 2358.2551 | 1179.6312 | 2341.2286 | 1171.1179 | 2340.2446 | 1170.6259 | G | 232.1404 | 116.5738 | 215.1139 | 108.0606 |  |  | 2 |
| 24 |           |           |           |           |           |           | R | 175.1190 | 88.0631  | 158.0924 | 79.5498  |  |  | 1 |

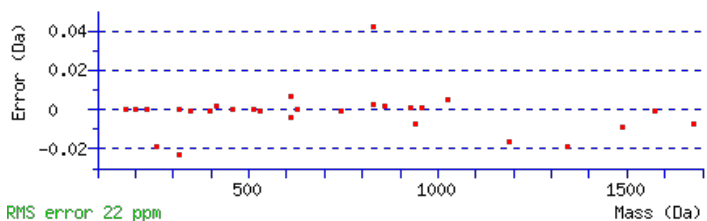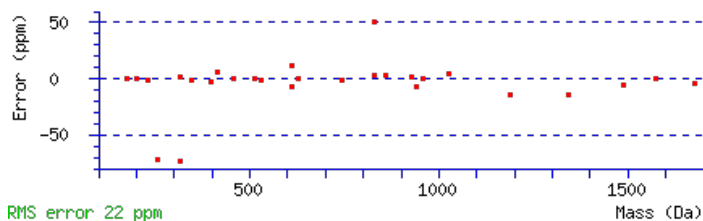

NCBI BLAST search of [NSITLTNLTPGTEYVVSIVALNGR](#)  
 (Parameters: blastp, nr protein database, expect=20000, no filter, PAM30)  
 Other BLAST [web gateways](#)

All matches to this query

| Score | Mr(calc)  | Delta   | Sequence                                 |
|-------|-----------|---------|------------------------------------------|
| 103.3 | 2531.3595 | -0.0001 | <a href="#">NSITLTNLTPGTEYVVSIVALNGR</a> |
| 0.6   | 2531.3682 | -0.0088 | <a href="#">LALRLYTCQEWAVVKVQAQVR</a>    |

Mascot: <http://www.matrixscience.com/>

# Mascot Search Results

## Peptide View

MS/MS Fragmentation of **NSITLTNLTPGTEYVVSIVALNGREESPLLIQGSTVSDVPR**

Found in **P02751** in **uni\_human\_nr**, FINC\_HUMAN Fibronectin OS=Homo sapiens GN=FN1 PE=1 SV=4

Match to Query 18731: 4471.339056 from(1118.842040,4+) intensity(688823.1875) rtinseconds(3653) scans(22315) index(17353)

Title: 130809\_HPL\_Human\_Plaque\_BR2\_TR3\_08\_Spectrum038851\_scans\_22315\_RTINSECONDS=3653

Data file E:\\RAW\\HumanPlaques\\imgf\\T\\1D\\T130809\_HPL\_Human\_Plaque\_BR2\_TR3\_08.mgf

Click mouse within plot area to zoom in by factor of two about that point

Or,  to  Da

Label all possible matches  Label matches used for scoring

Show Y-axis

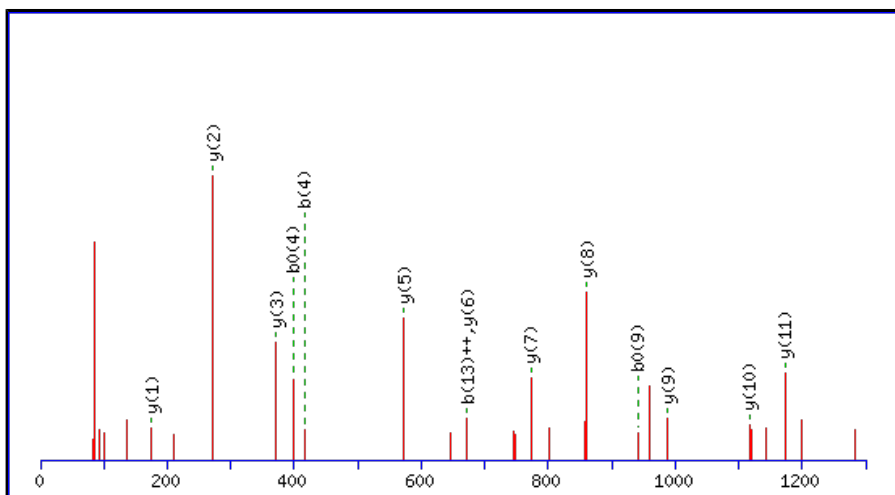

Monoisotopic mass of neutral peptide Mr(calc): 4469.3177

Fixed modifications: Carbamidomethyl (C) (apply to specified residues or termini only)

Variable modifications:

N7 : Deamidated (NQ)

N22 : Deamidated (NQ)

Ions Score: 47 Expect: 0.00046

Matches : 14/484 fragment ions using 25 most intense peaks ([help](#))

| #  | b               | b <sup>++</sup> | b <sup>*</sup> | b <sup>***</sup> | b <sup>0</sup>  | b <sup>0++</sup> | Seq. | y         | y <sup>++</sup> | y <sup>*</sup> | y <sup>***</sup> | y <sup>0</sup> | y <sup>0++</sup> | #  |
|----|-----------------|-----------------|----------------|------------------|-----------------|------------------|------|-----------|-----------------|----------------|------------------|----------------|------------------|----|
| 1  | 115.0502        | 58.0287         | 98.0237        | 49.5155          |                 |                  | N    |           |                 |                |                  |                |                  | 42 |
| 2  | 202.0822        | 101.5448        | 185.0557       | 93.0315          | 184.0717        | 92.5395          | S    | 4356.2821 | 2178.6447       | 4339.2555      | 2170.1314        | 4338.2715      | 2169.6394        | 41 |
| 3  | 315.1663        | 158.0868        | 298.1397       | 149.5735         | 297.1557        | 149.0815         | I    | 4269.2500 | 2135.1287       | 4252.2235      | 2126.6154        | 4251.2395      | 2126.1234        | 40 |
| 4  | <b>416.2140</b> | 208.6106        | 399.1874       | 200.0974         | <b>398.2034</b> | 199.6053         | T    | 4156.1660 | 2078.5866       | 4139.1394      | 2070.0734        | 4138.1554      | 2069.5813        | 39 |
| 5  | 529.2980        | 265.1527        | 512.2715       | 256.6394         | 511.2875        | 256.1474         | L    | 4055.1183 | 2028.0628       | 4038.0918      | 2019.5495        | 4037.1077      | 2019.0575        | 38 |
| 6  | 630.3457        | 315.6765        | 613.3192       | 307.1632         | 612.3352        | 306.6712         | T    | 3942.0342 | 1971.5208       | 3925.0077      | 1963.0075        | 3924.0237      | 1962.5155        | 37 |
| 7  | 745.3727        | 373.1900        | 728.3461       | 364.6767         | 727.3621        | 364.1847         | N    | 3840.9866 | 1920.9969       | 3823.9600      | 1912.4836        | 3822.9760      | 1911.9916        | 36 |
| 8  | 858.4567        | 429.7320        | 841.4302       | 421.2187         | 840.4462        | 420.7267         | L    | 3725.9596 | 1863.4834       | 3708.9331      | 1854.9702        | 3707.9490      | 1854.4782        | 35 |
| 9  | 959.5044        | 480.2558        | 942.4779       | 471.7426         | <b>941.4938</b> | 471.2506         | T    | 3612.8756 | 1806.9414       | 3595.8490      | 1798.4281        | 3594.8650      | 1797.9361        | 34 |
| 10 | 1056.5572       | 528.7822        | 1039.5306      | 520.2689         | 1038.5466       | 519.7769         | P    | 3511.8279 | 1756.4176       | 3494.8013      | 1747.9043        | 3493.8173      | 1747.4123        | 33 |
| 11 | 1113.5786       | 557.2930        | 1096.5521      | 548.7797         | 1095.5681       | 548.2877         | G    | 3414.7751 | 1707.8912       | 3397.7486      | 1699.3779        | 3396.7645      | 1698.8859        | 32 |
| 12 | 1214.6263       | 607.8168        | 1197.5998      | 599.3035         | 1196.6157       | 598.8115         | T    | 3357.7536 | 1679.3805       | 3340.7271      | 1670.8672        | 3339.7431      | 1670.3752        | 31 |
| 13 | 1343.6689       | <b>672.3381</b> | 1326.6424      | 663.8248         | 1325.6583       | 663.3328         | E    | 3256.7060 | 1628.8566       | 3239.6794      | 1620.3433        | 3238.6954      | 1619.8513        | 30 |
| 14 | 1506.7322       | 753.8698        | 1489.7057      | 745.3565         | 1488.7217       | 744.8645         | Y    | 3127.6634 | 1564.3353       | 3110.6368      | 1555.8220        | 3109.6528      | 1555.3300        | 29 |
| 15 | 1605.8006       | 803.4040        | 1588.7741      | 794.8907         | 1587.7901       | 794.3987         | V    | 2964.6000 | 1482.8037       | 2947.5735      | 1474.2904        | 2946.5895      | 1473.7984        | 28 |
| 16 | 1704.8691       | 852.9382        | 1687.8425      | 844.4249         | 1686.8585       | 843.9329         | V    | 2865.5316 | 1433.2695       | 2848.5051      | 1424.7562        | 2847.5211      | 1424.2642        | 27 |
| 17 | 1791.9011       | 896.4542        | 1774.8745      | 887.9409         | 1773.8905       | 887.4489         | S    | 2766.4632 | 1383.7352       | 2749.4367      | 1375.2220        | 2748.4526      | 1374.7300        | 26 |



|    |           |           |           |           |           |           |   |           |           |           |           |           |           |    |
|----|-----------|-----------|-----------|-----------|-----------|-----------|---|-----------|-----------|-----------|-----------|-----------|-----------|----|
| 18 | 1904.9852 | 952.9962  | 1887.9586 | 944.4829  | 1886.9746 | 943.9909  | I | 2679.4312 | 1340.2192 | 2662.4046 | 1331.7060 | 2661.4206 | 1331.2139 | 25 |
| 19 | 2004.0536 | 1002.5304 | 1987.0270 | 994.0171  | 1986.0430 | 993.5251  | V | 2566.3471 | 1283.6772 | 2549.3206 | 1275.1639 | 2548.3366 | 1274.6719 | 24 |
| 20 | 2075.0907 | 1038.0490 | 2058.0641 | 1029.5357 | 2057.0801 | 1029.0437 | A | 2467.2787 | 1234.1430 | 2450.2522 | 1225.6297 | 2449.2681 | 1225.1377 | 23 |
| 21 | 2188.1747 | 1094.5910 | 2171.1482 | 1086.0777 | 2170.1642 | 1085.5857 | L | 2396.2416 | 1198.6244 | 2379.2150 | 1190.1112 | 2378.2310 | 1189.6192 | 22 |
| 22 | 2303.2017 | 1152.1045 | 2286.1751 | 1143.5912 | 2285.1911 | 1143.0992 | N | 2283.1575 | 1142.0824 | 2266.1310 | 1133.5691 | 2265.1470 | 1133.0771 | 21 |
| 23 | 2360.2232 | 1180.6152 | 2343.1966 | 1172.1019 | 2342.2126 | 1171.6099 | G | 2168.1306 | 1084.5689 | 2151.1040 | 1076.0557 | 2150.1200 | 1075.5636 | 20 |
| 24 | 2516.3243 | 1258.6658 | 2499.2977 | 1250.1525 | 2498.3137 | 1249.6605 | R | 2111.1091 | 1056.0582 | 2094.0826 | 1047.5449 | 2093.0986 | 1047.0529 | 19 |
| 25 | 2645.3669 | 1323.1871 | 2628.3403 | 1314.6738 | 2627.3563 | 1314.1818 | E | 1955.0080 | 978.0076  | 1937.9815 | 969.4944  | 1936.9974 | 969.0024  | 18 |
| 26 | 2774.4094 | 1387.7084 | 2757.3829 | 1379.1951 | 2756.3989 | 1378.7031 | E | 1825.9654 | 913.4863  | 1808.9389 | 904.9731  | 1807.9549 | 904.4811  | 17 |
| 27 | 2861.4415 | 1431.2244 | 2844.4149 | 1422.7111 | 2843.4309 | 1422.2191 | S | 1696.9228 | 848.9651  | 1679.8963 | 840.4518  | 1678.9123 | 839.9598  | 16 |
| 28 | 2958.4942 | 1479.7508 | 2941.4677 | 1471.2375 | 2940.4837 | 1470.7455 | P | 1609.8908 | 805.4490  | 1592.8642 | 796.9358  | 1591.8802 | 796.4438  | 15 |
| 29 | 3071.5783 | 1536.2928 | 3054.5518 | 1527.7795 | 3053.5677 | 1527.2875 | L | 1512.8380 | 756.9227  | 1495.8115 | 748.4094  | 1494.8275 | 747.9174  | 14 |
| 30 | 3184.6624 | 1592.8348 | 3167.6358 | 1584.3215 | 3166.6518 | 1583.8295 | L | 1399.7540 | 700.3806  | 1382.7274 | 691.8673  | 1381.7434 | 691.3753  | 13 |
| 31 | 3297.7464 | 1649.3769 | 3280.7199 | 1640.8636 | 3279.7359 | 1640.3716 | I | 1286.6699 | 643.8386  | 1269.6434 | 635.3253  | 1268.6593 | 634.8333  | 12 |
| 32 | 3354.7679 | 1677.8876 | 3337.7413 | 1669.3743 | 3336.7573 | 1668.8823 | G | 1173.5858 | 587.2966  | 1156.5593 | 578.7833  | 1155.5753 | 578.2913  | 11 |
| 33 | 3482.8265 | 1741.9169 | 3465.7999 | 1733.4036 | 3464.8159 | 1732.9116 | Q | 1116.5644 | 558.7858  | 1099.5378 | 550.2726  | 1098.5538 | 549.7805  | 10 |
| 34 | 3610.8851 | 1805.9462 | 3593.8585 | 1797.4329 | 3592.8745 | 1796.9409 | Q | 988.5058  | 494.7565  | 971.4793  | 486.2433  | 970.4952  | 485.7513  | 9  |
| 35 | 3697.9171 | 1849.4622 | 3680.8905 | 1840.9489 | 3679.9065 | 1840.4569 | S | 860.4472  | 430.7272  | 843.4207  | 422.2140  | 842.4367  | 421.7220  | 8  |
| 36 | 3798.9648 | 1899.9860 | 3781.9382 | 1891.4727 | 3780.9542 | 1890.9807 | T | 773.4152  | 387.2112  | 756.3886  | 378.6980  | 755.4046  | 378.2060  | 7  |
| 37 | 3898.0332 | 1949.5202 | 3881.0066 | 1941.0070 | 3880.0226 | 1940.5149 | V | 672.3675  | 336.6874  | 655.3410  | 328.1741  | 654.3570  | 327.6821  | 6  |
| 38 | 3985.0652 | 1993.0362 | 3968.0387 | 1984.5230 | 3967.0546 | 1984.0310 | S | 573.2991  | 287.1532  | 556.2726  | 278.6399  | 555.2885  | 278.1479  | 5  |
| 39 | 4100.0921 | 2050.5497 | 4083.0656 | 2042.0364 | 4082.0816 | 2041.5444 | D | 486.2671  | 243.6372  | 469.2405  | 235.1239  | 468.2565  | 234.6319  | 4  |
| 40 | 4199.1606 | 2100.0839 | 4182.1340 | 2091.5706 | 4181.1500 | 2091.0786 | V | 371.2401  | 186.1237  | 354.2136  | 177.6104  |           |           | 3  |
| 41 | 4296.2133 | 2148.6103 | 4279.1868 | 2140.0970 | 4278.2028 | 2139.6050 | P | 272.1717  | 136.5895  | 255.1452  | 128.0762  |           |           | 2  |
| 42 |           |           |           |           |           |           | R | 175.1190  | 88.0631   | 158.0924  | 79.5498   |           |           | 1  |

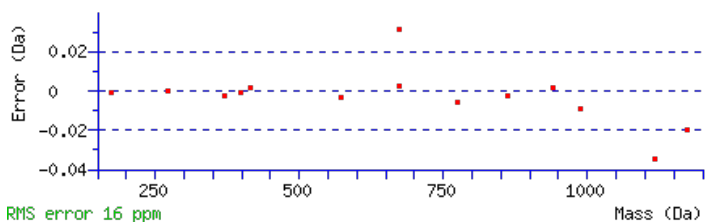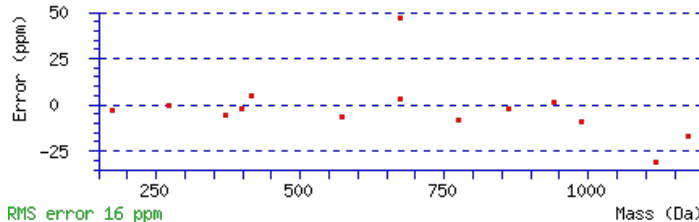

NCBI BLAST search of [NSITLTNLTTPGTEYVVSIVALNGREESPLLIGQOSTVSDVPR](#)

(Parameters: blastp, nr protein database, expect=20000, no filter, PAM30)

Other BLAST [web gateways](#)

All matches to this query

| Score | Mr(cal)   | Delta  | Sequence                                                    | Site Analysis              |
|-------|-----------|--------|-------------------------------------------------------------|----------------------------|
| 47.3  | 4469.3177 | 2.0214 | <a href="#">NSITLTNLTTPGTEYVVSIVALNGREESPLLIGQOSTVSDVPR</a> | Deamidated N7, N22 32.86%  |
| 46.4  | 4469.3177 | 2.0214 | <a href="#">NSITLTNLTTPGTEYVVSIVALNGREESPLLIGQOSTVSDVPR</a> | Deamidated N22, Q33 26.96% |
| 43.6  | 4469.3177 | 2.0214 | <a href="#">NSITLTNLTTPGTEYVVSIVALNGREESPLLIGQOSTVSDVPR</a> | Deamidated N1, N22 14.18%  |
| 43.6  | 4469.3177 | 2.0214 | <a href="#">NSITLTNLTTPGTEYVVSIVALNGREESPLLIGQOSTVSDVPR</a> | Deamidated N1, N7 14.18%   |
| 38.6  | 4469.3177 | 2.0214 | <a href="#">NSITLTNLTTPGTEYVVSIVALNGREESPLLIGQOSTVSDVPR</a> | Deamidated Q33, Q34 4.42%  |
| 38.6  | 4469.3177 | 2.0214 | <a href="#">NSITLTNLTTPGTEYVVSIVALNGREESPLLIGQOSTVSDVPR</a> | Deamidated N22, Q34 4.42%  |
| 33.5  | 4469.3177 | 2.0214 | <a href="#">NSITLTNLTTPGTEYVVSIVALNGREESPLLIGQOSTVSDVPR</a> | Deamidated N7, Q33 1.36%   |
| 33.1  | 4469.3177 | 2.0214 | <a href="#">NSITLTNLTTPGTEYVVSIVALNGREESPLLIGQOSTVSDVPR</a> | Deamidated N1, Q33 1.25%   |
| 24.8  | 4469.3177 | 2.0214 | <a href="#">NSITLTNLTTPGTEYVVSIVALNGREESPLLIGQOSTVSDVPR</a> | Deamidated N7, Q34 0.19%   |
| 24.4  | 4469.3177 | 2.0214 | <a href="#">NSITLTNLTTPGTEYVVSIVALNGREESPLLIGQOSTVSDVPR</a> | Deamidated N1, Q34 0.17%   |



# Mascot Search Results

## Peptide View

MS/MS Fragmentation of **NSITLTNLTPGTEYVVSIVALNGREESPLLIGQSTVSDVPR**

Found in **P02751** in **uni\_human\_nr**, FINC\_HUMAN Fibronectin OS=Homo sapiens GN=FN1 PE=1 SV=4

Match to Query 18731: 4471.339056 from(1118.842040,4+) intensity(688823.1875) rtinseconds(3653) scans(22315) index(17353)

Title: 130809\_HPL\_Human\_Plaque\_BR2\_TR3\_08\_Spectrum038851\_scans\_22315\_RTINSECONDS=3653

Data file E:\\RAW\\HumanPlaques\\mgf\\T\\1D\\T130809\_HPL\_Human\_Plaque\_BR2\_TR3\_08.mgf

Click mouse within plot area to zoom in by factor of two about that point

Or,  to  Da  
 Label all possible matches  Label matches used for scoring   
 Show Y-axis

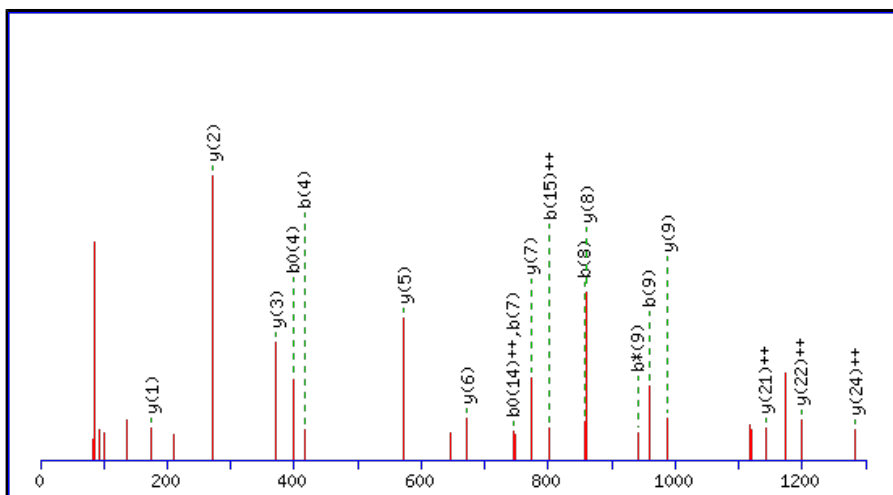

Monoisotopic mass of neutral peptide **Mr(calc): 4469.3177**

Fixed modifications: Carbamidomethyl (C) (apply to specified residues or termini only)

Variable modifications:

N22 : Deamidated (NQ)

Q33 : Deamidated (NQ)

Ions Score: 46 Expect: 0.00056

Matches : 19/484 fragment ions using 25 most intense peaks ([help](#))

| #  | b               | b <sup>++</sup> | b <sup>*</sup>  | b <sup>***</sup> | b <sup>0</sup>  | b <sup>0++</sup> | Seq. | y         | y <sup>++</sup> | y <sup>*</sup> | y <sup>***</sup> | y <sup>0</sup> | y <sup>0++</sup> | #  |
|----|-----------------|-----------------|-----------------|------------------|-----------------|------------------|------|-----------|-----------------|----------------|------------------|----------------|------------------|----|
| 1  | 115.0502        | 58.0287         | 98.0237         | 49.5155          |                 |                  | N    |           |                 |                |                  |                |                  | 42 |
| 2  | 202.0822        | 101.5448        | 185.0557        | 93.0315          | 184.0717        | 92.5395          | S    | 4356.2821 | 2178.6447       | 4339.2555      | 2170.1314        | 4338.2715      | 2169.6394        | 41 |
| 3  | 315.1663        | 158.0868        | 298.1397        | 149.5735         | 297.1557        | 149.0815         | I    | 4269.2500 | 2135.1287       | 4252.2235      | 2126.6154        | 4251.2395      | 2126.1234        | 40 |
| 4  | <b>416.2140</b> | 208.6106        | 399.1874        | 200.0974         | <b>398.2034</b> | 199.6053         | T    | 4156.1660 | 2078.5866       | 4139.1394      | 2070.0734        | 4138.1554      | 2069.5813        | 39 |
| 5  | 529.2980        | 265.1527        | 512.2715        | 256.6394         | 511.2875        | 256.1474         | L    | 4055.1183 | 2028.0628       | 4038.0918      | 2019.5495        | 4037.1077      | 2019.0575        | 38 |
| 6  | 630.3457        | 315.6765        | 613.3192        | 307.1632         | 612.3352        | 306.6712         | T    | 3942.0342 | 1971.5208       | 3925.0077      | 1963.0075        | 3924.0237      | 1962.5155        | 37 |
| 7  | <b>744.3886</b> | 372.6980        | 727.3621        | 364.1847         | 726.3781        | 363.6927         | N    | 3840.9866 | 1920.9969       | 3823.9600      | 1912.4836        | 3822.9760      | 1911.9916        | 36 |
| 8  | <b>857.4727</b> | 429.2400        | 840.4462        | 420.7267         | 839.4621        | 420.2347         | L    | 3726.9436 | 1863.9755       | 3709.9171      | 1855.4622        | 3708.9331      | 1854.9702        | 35 |
| 9  | <b>958.5204</b> | 479.7638        | <b>941.4938</b> | 471.2506         | 940.5098        | 470.7585         | T    | 3613.8596 | 1807.4334       | 3596.8330      | 1798.9201        | 3595.8490      | 1798.4281        | 34 |
| 10 | 1055.5732       | 528.2902        | 1038.5466       | 519.7769         | 1037.5626       | 519.2849         | P    | 3512.8119 | 1756.9096       | 3495.7853      | 1748.3963        | 3494.8013      | 1747.9043        | 33 |
| 11 | 1112.5946       | 556.8009        | 1095.5681       | 548.2877         | 1094.5840       | 547.7957         | G    | 3415.7591 | 1708.3832       | 3398.7326      | 1699.8699        | 3397.7486      | 1699.3779        | 32 |
| 12 | 1213.6423       | 607.3248        | 1196.6157       | 598.8115         | 1195.6317       | 598.3195         | T    | 3358.7377 | 1679.8725       | 3341.7111      | 1671.3592        | 3340.7271      | 1670.8672        | 31 |
| 13 | 1342.6849       | 671.8461        | 1325.6583       | 663.3328         | 1324.6743       | 662.8408         | E    | 3257.6900 | 1629.3486       | 3240.6634      | 1620.8354        | 3239.6794      | 1620.3433        | 30 |
| 14 | 1505.7482       | 753.3777        | 1488.7217       | 744.8645         | 1487.7377       | <b>744.3725</b>  | Y    | 3128.6474 | 1564.8273       | 3111.6208      | 1556.3141        | 3110.6368      | 1555.8220        | 29 |
| 15 | 1604.8166       | <b>802.9120</b> | 1587.7901       | 794.3987         | 1586.8061       | 793.9067         | V    | 2965.5841 | 1483.2957       | 2948.5575      | 1474.7824        | 2947.5735      | 1474.2904        | 28 |
| 16 | 1703.8850       | 852.4462        | 1686.8585       | 843.9329         | 1685.8745       | 843.4409         | V    | 2866.5156 | 1433.7615       | 2849.4891      | 1425.2482        | 2848.5051      | 1424.7562        | 27 |
| 17 | 1790.9171       | 895.9622        | 1773.8905       | 887.4489         | 1772.9065       | 886.9569         | S    | 2767.4472 | 1384.2273       | 2750.4207      | 1375.7140        | 2749.4367      | 1375.2220        | 26 |

|    |           |           |           |           |           |           |   |           |           |           |           |           |           |    |
|----|-----------|-----------|-----------|-----------|-----------|-----------|---|-----------|-----------|-----------|-----------|-----------|-----------|----|
| 18 | 1904.0011 | 952.5042  | 1886.9746 | 943.9909  | 1885.9906 | 943.4989  | I | 2680.4152 | 1340.7112 | 2663.3887 | 1332.1980 | 2662.4046 | 1331.7060 | 25 |
| 19 | 2003.0696 | 1002.0384 | 1986.0430 | 993.5251  | 1985.0590 | 993.0331  | V | 2567.3311 | 1284.1692 | 2550.3046 | 1275.6559 | 2549.3206 | 1275.1639 | 24 |
| 20 | 2074.1067 | 1037.5570 | 2057.0801 | 1029.0437 | 2056.0961 | 1028.5517 | A | 2468.2627 | 1234.6350 | 2451.2362 | 1226.1217 | 2450.2522 | 1225.6297 | 23 |
| 21 | 2187.1907 | 1094.0990 | 2170.1642 | 1085.5857 | 2169.1802 | 1085.0937 | L | 2397.2256 | 1199.1164 | 2380.1991 | 1190.6032 | 2379.2150 | 1190.1112 | 22 |
| 22 | 2302.2177 | 1151.6125 | 2285.1911 | 1143.0992 | 2284.2071 | 1142.6072 | N | 2284.1415 | 1142.5744 | 2267.1150 | 1134.0611 | 2266.1310 | 1133.5691 | 21 |
| 23 | 2359.2391 | 1180.1232 | 2342.2126 | 1171.6099 | 2341.2286 | 1171.1179 | G | 2169.1146 | 1085.0609 | 2152.0881 | 1076.5477 | 2151.1040 | 1076.0557 | 20 |
| 24 | 2515.3402 | 1258.1738 | 2498.3137 | 1249.6605 | 2497.3297 | 1249.1685 | R | 2112.0931 | 1056.5502 | 2095.0666 | 1048.0369 | 2094.0826 | 1047.5449 | 19 |
| 25 | 2644.3828 | 1322.6951 | 2627.3563 | 1314.1818 | 2626.3723 | 1313.6898 | E | 1955.9920 | 978.4997  | 1938.9655 | 969.9864  | 1937.9815 | 969.4944  | 18 |
| 26 | 2773.4254 | 1387.2164 | 2756.3989 | 1378.7031 | 2755.4149 | 1378.2111 | E | 1826.9494 | 913.9784  | 1809.9229 | 905.4651  | 1808.9389 | 904.9731  | 17 |
| 27 | 2860.4575 | 1430.7324 | 2843.4309 | 1422.2191 | 2842.4469 | 1421.7271 | S | 1697.9068 | 849.4571  | 1680.8803 | 840.9438  | 1679.8963 | 840.4518  | 16 |
| 28 | 2957.5102 | 1479.2588 | 2940.4837 | 1470.7455 | 2939.4997 | 1470.2535 | P | 1610.8748 | 805.9410  | 1593.8483 | 797.4278  | 1592.8642 | 796.9358  | 15 |
| 29 | 3070.5943 | 1535.8008 | 3053.5677 | 1527.2875 | 3052.5837 | 1526.7955 | L | 1513.8221 | 757.4147  | 1496.7955 | 748.9014  | 1495.8115 | 748.4094  | 14 |
| 30 | 3183.6784 | 1592.3428 | 3166.6518 | 1583.8295 | 3165.6678 | 1583.3375 | L | 1400.7380 | 700.8726  | 1383.7114 | 692.3594  | 1382.7274 | 691.8673  | 13 |
| 31 | 3296.7624 | 1648.8848 | 3279.7359 | 1640.3716 | 3278.7519 | 1639.8796 | I | 1287.6539 | 644.3306  | 1270.6274 | 635.8173  | 1269.6434 | 635.3253  | 12 |
| 32 | 3353.7839 | 1677.3956 | 3336.7573 | 1668.8823 | 3335.7733 | 1668.3903 | G | 1174.5699 | 587.7886  | 1157.5433 | 579.2753  | 1156.5593 | 578.7833  | 11 |
| 33 | 3482.8265 | 1741.9169 | 3465.7999 | 1733.4036 | 3464.8159 | 1732.9116 | Q | 1117.5484 | 559.2778  | 1100.5218 | 550.7646  | 1099.5378 | 550.2726  | 10 |
| 34 | 3610.8851 | 1805.9462 | 3593.8585 | 1797.4329 | 3592.8745 | 1796.9409 | Q | 988.5058  | 494.7565  | 971.4793  | 486.2433  | 970.4952  | 485.7513  | 9  |
| 35 | 3697.9171 | 1849.4622 | 3680.8905 | 1840.9489 | 3679.9065 | 1840.4569 | S | 860.4472  | 430.7272  | 843.4207  | 422.2140  | 842.4367  | 421.7220  | 8  |
| 36 | 3798.9648 | 1899.9860 | 3781.9382 | 1891.4727 | 3780.9542 | 1890.9807 | T | 773.4152  | 387.2112  | 756.3886  | 378.6980  | 755.4046  | 378.2060  | 7  |
| 37 | 3898.0332 | 1949.5202 | 3881.0066 | 1941.0070 | 3880.0226 | 1940.5149 | V | 672.3675  | 336.6874  | 655.3410  | 328.1741  | 654.3570  | 327.6821  | 6  |
| 38 | 3985.0652 | 1993.0362 | 3968.0387 | 1984.5230 | 3967.0546 | 1984.0310 | S | 573.2991  | 287.1532  | 556.2726  | 278.6399  | 555.2885  | 278.1479  | 5  |
| 39 | 4100.0921 | 2050.5497 | 4083.0656 | 2042.0364 | 4082.0816 | 2041.5444 | D | 486.2671  | 243.6372  | 469.2405  | 235.1239  | 468.2565  | 234.6319  | 4  |
| 40 | 4199.1606 | 2100.0839 | 4182.1340 | 2091.5706 | 4181.1500 | 2091.0786 | V | 371.2401  | 186.1237  | 354.2136  | 177.6104  |           |           | 3  |
| 41 | 4296.2133 | 2148.6103 | 4279.1868 | 2140.0970 | 4278.2028 | 2139.6050 | P | 272.1717  | 136.5895  | 255.1452  | 128.0762  |           |           | 2  |
| 42 |           |           |           |           |           |           | R | 175.1190  | 88.0631   | 158.0924  | 79.5498   |           |           | 1  |

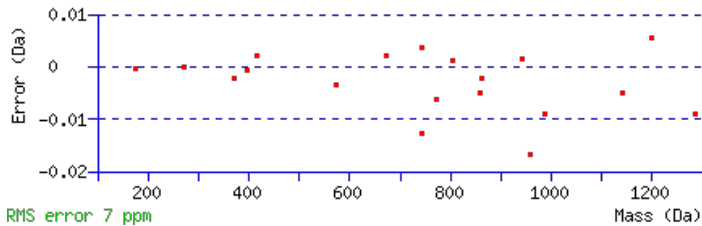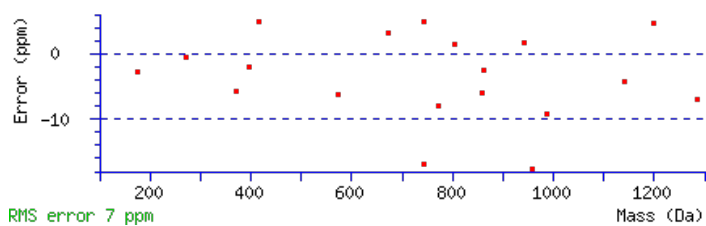

NCBI BLAST search of [NSITLTNLTTPGTEYVVSIVALNGREESPLLIGQOSTVSDVPR](#)  
 (Parameters: blastp, nr protein database, expect=20000, no filter, PAM30)  
 Other BLAST [web gateways](#)

All matches to this query

| Score | Mr(cal)   | Delta  | Sequence                                                    | Site Analysis              |
|-------|-----------|--------|-------------------------------------------------------------|----------------------------|
| 46.4  | 4469.3177 | 2.0214 | <a href="#">NSITLTNLTTPGTEYVVSIVALNGREESPLLIGQOSTVSDVPR</a> | Deamidated N22, Q33 32.67% |
| 44.0  | 4469.3177 | 2.0214 | <a href="#">NSITLTNLTTPGTEYVVSIVALNGREESPLLIGQOSTVSDVPR</a> | Deamidated N7, N22 18.63%  |
| 43.6  | 4469.3177 | 2.0214 | <a href="#">NSITLTNLTTPGTEYVVSIVALNGREESPLLIGQOSTVSDVPR</a> | Deamidated N1, N22 17.19%  |
| 43.6  | 4469.3177 | 2.0214 | <a href="#">NSITLTNLTTPGTEYVVSIVALNGREESPLLIGQOSTVSDVPR</a> | Deamidated N1, N7 17.19%   |
| 38.6  | 4469.3177 | 2.0214 | <a href="#">NSITLTNLTTPGTEYVVSIVALNGREESPLLIGQOSTVSDVPR</a> | Deamidated Q33, Q34 5.36%  |
| 38.6  | 4469.3177 | 2.0214 | <a href="#">NSITLTNLTTPGTEYVVSIVALNGREESPLLIGQOSTVSDVPR</a> | Deamidated N22, Q34 5.36%  |
| 33.5  | 4469.3177 | 2.0214 | <a href="#">NSITLTNLTTPGTEYVVSIVALNGREESPLLIGQOSTVSDVPR</a> | Deamidated N7, Q33 1.65%   |
| 33.1  | 4469.3177 | 2.0214 | <a href="#">NSITLTNLTTPGTEYVVSIVALNGREESPLLIGQOSTVSDVPR</a> | Deamidated N1, Q33 1.51%   |
| 24.8  | 4469.3177 | 2.0214 | <a href="#">NSITLTNLTTPGTEYVVSIVALNGREESPLLIGQOSTVSDVPR</a> | Deamidated N7, Q34 0.23%   |
| 24.4  | 4469.3177 | 2.0214 | <a href="#">NSITLTNLTTPGTEYVVSIVALNGREESPLLIGQOSTVSDVPR</a> | Deamidated N1, Q34 0.21%   |



# Mascot Search Results

## Peptide View

MS/MS Fragmentation of **NSITLTNLTPGTEYVVSIVALNGREESPLLIQGSTVSDVPR**

Found in **P02751** in **uni\_human\_nr**, FINC\_HUMAN Fibronectin OS=Homo sapiens GN=FN1 PE=1 SV=4

Match to Query 18277: 4468.334176 from(1118.090820,4+) intensity(905530.4375) rtinseconds(3650) scans(22060) index(16811)

Title: 130801\_HPL\_Human\_Plaque\_BR1\_TR1\_08\_Spectrum038087\_scans\_22060\_RTINSECONDS=3650

Data file E:\\RAW\\HumanPlaques\\imgf\\T\\1D\\T130801\_HPL\_Human\_Plaque\_BR1\_TR1\_08.mgf

Click mouse within plot area to zoom in by factor of two about that point

Or, to Da

Label all possible matches Label matches used for scoring

Show Y-axis

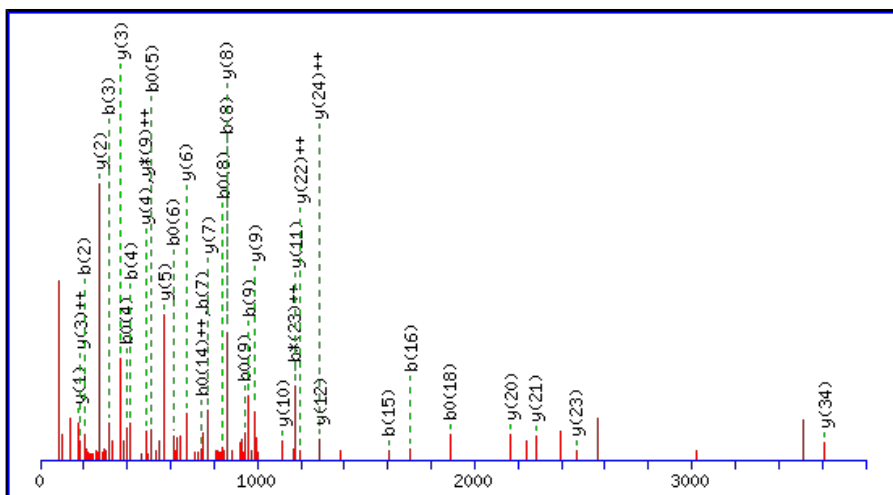

Monoisotopic mass of neutral peptide **Mr(calc): 4468.3337**

Fixed modifications: Carbamidomethyl (C) (apply to specified residues or termini only)

Variable modifications:

N22 : Deamidated (NQ)

Ions Score: 106 Expect: 6.9e-010

Matches : 36/484 fragment ions using 51 most intense peaks ([help](#))

| #  | b                | b <sup>++</sup> | b <sup>*</sup> | b <sup>*++</sup> | b <sup>0</sup>   | b <sup>0++</sup> | Seq. | y                | y <sup>++</sup> | y <sup>*</sup> | y <sup>*++</sup> | y <sup>0</sup> | y <sup>0++</sup> | #  |
|----|------------------|-----------------|----------------|------------------|------------------|------------------|------|------------------|-----------------|----------------|------------------|----------------|------------------|----|
| 1  | 115.0502         | 58.0287         | 98.0237        | 49.5155          |                  |                  | N    |                  |                 |                |                  |                |                  | 42 |
| 2  | <b>202.0822</b>  | 101.5448        | 185.0557       | 93.0315          | 184.0717         | 92.5395          | S    | 4355.2981        | 2178.1527       | 4338.2715      | 2169.6394        | 4337.2875      | 2169.1474        | 41 |
| 3  | <b>315.1663</b>  | 158.0868        | 298.1397       | 149.5735         | 297.1557         | 149.0815         | I    | 4268.2660        | 2134.6367       | 4251.2395      | 2126.1234        | 4250.2555      | 2125.6314        | 40 |
| 4  | <b>416.2140</b>  | 208.6106        | 399.1874       | 200.0974         | <b>398.2034</b>  | 199.6053         | T    | 4155.1820        | 2078.0946       | 4138.1554      | 2069.5813        | 4137.1714      | 2069.0893        | 39 |
| 5  | 529.2980         | 265.1527        | 512.2715       | 256.6394         | <b>511.2875</b>  | 256.1474         | L    | 4054.1343        | 2027.5708       | 4037.1077      | 2019.0575        | 4036.1237      | 2018.5655        | 38 |
| 6  | 630.3457         | 315.6765        | 613.3192       | 307.1632         | <b>612.3352</b>  | 306.6712         | T    | 3941.0502        | 1971.0287       | 3924.0237      | 1962.5155        | 3923.0397      | 1962.0235        | 37 |
| 7  | <b>744.3886</b>  | 372.6980        | 727.3621       | 364.1847         | 726.3781         | 363.6927         | N    | 3840.0025        | 1920.5049       | 3822.9760      | 1911.9916        | 3821.9920      | 1911.4996        | 36 |
| 8  | <b>857.4727</b>  | 429.2400        | 840.4462       | 420.7267         | <b>839.4621</b>  | 420.2347         | L    | 3725.9596        | 1863.4834       | 3708.9331      | 1854.9702        | 3707.9490      | 1854.4782        | 35 |
| 9  | <b>958.5204</b>  | 479.7638        | 941.4938       | 471.2506         | <b>940.5098</b>  | 470.7585         | T    | <b>3612.8756</b> | 1806.9414       | 3595.8490      | 1798.4281        | 3594.8650      | 1797.9361        | 34 |
| 10 | 1055.5732        | 528.2902        | 1038.5466      | 519.7769         | 1037.5626        | 519.2849         | P    | 3511.8279        | 1756.4176       | 3494.8013      | 1747.9043        | 3493.8173      | 1747.4123        | 33 |
| 11 | 1112.5946        | 556.8009        | 1095.5681      | 548.2877         | 1094.5840        | 547.7957         | G    | 3414.7751        | 1707.8912       | 3397.7486      | 1699.3779        | 3396.7645      | 1698.8859        | 32 |
| 12 | 1213.6423        | 607.3248        | 1196.6157      | 598.8115         | 1195.6317        | 598.3195         | T    | 3357.7536        | 1679.3805       | 3340.7271      | 1670.8672        | 3339.7431      | 1670.3752        | 31 |
| 13 | 1342.6849        | 671.8461        | 1325.6583      | 663.3328         | 1324.6743        | 662.8408         | E    | 3256.7060        | 1628.8566       | 3239.6794      | 1620.3433        | 3238.6954      | 1619.8513        | 30 |
| 14 | 1505.7482        | 753.3777        | 1488.7217      | 744.8645         | 1487.7377        | <b>744.3725</b>  | Y    | 3127.6634        | 1564.3353       | 3110.6368      | 1555.8220        | 3109.6528      | 1555.3300        | 29 |
| 15 | <b>1604.8166</b> | 802.9120        | 1587.7901      | 794.3987         | 1586.8061        | 793.9067         | V    | 2964.6000        | 1482.8037       | 2947.5735      | 1474.2904        | 2946.5895      | 1473.7984        | 28 |
| 16 | <b>1703.8850</b> | 852.4462        | 1686.8585      | 843.9329         | 1685.8745        | 843.4409         | V    | 2865.5316        | 1433.2695       | 2848.5051      | 1424.7562        | 2847.5211      | 1424.2642        | 27 |
| 17 | 1790.9171        | 895.9622        | 1773.8905      | 887.4489         | 1772.9065        | 886.9569         | S    | 2766.4632        | 1383.7352       | 2749.4367      | 1375.2220        | 2748.4526      | 1374.7300        | 26 |
| 18 | 1904.0011        | 952.5042        | 1886.9746      | 943.9909         | <b>1885.9906</b> | 943.4989         | I    | 2679.4312        | 1340.2192       | 2662.4046      | 1331.7060        | 2661.4206      | 1331.2139        | 25 |

|    |           |           |           |           |           |           |   |           |           |           |           |           |           |    |
|----|-----------|-----------|-----------|-----------|-----------|-----------|---|-----------|-----------|-----------|-----------|-----------|-----------|----|
| 19 | 2003.0696 | 1002.0384 | 1986.0430 | 993.5251  | 1985.0590 | 993.0331  | V | 2566.3471 | 1283.6772 | 2549.3206 | 1275.1639 | 2548.3366 | 1274.6719 | 24 |
| 20 | 2074.1067 | 1037.5570 | 2057.0801 | 1029.0437 | 2056.0961 | 1028.5517 | A | 2467.2787 | 1234.1430 | 2450.2522 | 1225.6297 | 2449.2681 | 1225.1377 | 23 |
| 21 | 2187.1907 | 1094.0990 | 2170.1642 | 1085.5857 | 2169.1802 | 1085.0937 | L | 2396.2416 | 1198.6244 | 2379.2150 | 1190.1112 | 2378.2310 | 1189.6192 | 22 |
| 22 | 2302.2177 | 1151.6125 | 2285.1911 | 1143.0992 | 2284.2071 | 1142.6072 | N | 2283.1575 | 1142.0824 | 2266.1310 | 1133.5691 | 2265.1470 | 1133.0771 | 21 |
| 23 | 2359.2391 | 1180.1232 | 2342.2126 | 1171.6099 | 2341.2286 | 1171.1179 | G | 2168.1306 | 1084.5689 | 2151.1040 | 1076.0557 | 2150.1200 | 1075.5636 | 20 |
| 24 | 2515.3402 | 1258.1738 | 2498.3137 | 1249.6605 | 2497.3297 | 1249.1685 | R | 2111.1091 | 1056.0582 | 2094.0826 | 1047.5449 | 2093.0986 | 1047.0529 | 19 |
| 25 | 2644.3828 | 1322.6951 | 2627.3563 | 1314.1818 | 2626.3723 | 1313.6898 | E | 1955.0080 | 978.0076  | 1937.9815 | 969.4944  | 1936.9974 | 969.0024  | 18 |
| 26 | 2773.4254 | 1387.2164 | 2756.3989 | 1378.7031 | 2755.4149 | 1378.2111 | E | 1825.9654 | 913.4863  | 1808.9389 | 904.9731  | 1807.9549 | 904.4811  | 17 |
| 27 | 2860.4575 | 1430.7324 | 2843.4309 | 1422.2191 | 2842.4469 | 1421.7271 | S | 1696.9228 | 848.9651  | 1679.8963 | 840.4518  | 1678.9123 | 839.9598  | 16 |
| 28 | 2957.5102 | 1479.2588 | 2940.4837 | 1470.7455 | 2939.4997 | 1470.2535 | P | 1609.8908 | 805.4490  | 1592.8642 | 796.9358  | 1591.8802 | 796.4438  | 15 |
| 29 | 3070.5943 | 1535.8008 | 3053.5677 | 1527.2875 | 3052.5837 | 1526.7955 | L | 1512.8380 | 756.9227  | 1495.8115 | 748.4094  | 1494.8275 | 747.9174  | 14 |
| 30 | 3183.6784 | 1592.3428 | 3166.6518 | 1583.8295 | 3165.6678 | 1583.3375 | L | 1399.7540 | 700.3806  | 1382.7274 | 691.8673  | 1381.7434 | 691.3753  | 13 |
| 31 | 3296.7624 | 1648.8848 | 3279.7359 | 1640.3716 | 3278.7519 | 1639.8796 | I | 1286.6699 | 643.8386  | 1269.6434 | 635.3253  | 1268.6593 | 634.8333  | 12 |
| 32 | 3353.7839 | 1677.3956 | 3336.7573 | 1668.8823 | 3335.7733 | 1668.3903 | G | 1173.5858 | 587.2966  | 1156.5593 | 578.7833  | 1155.5753 | 578.2913  | 11 |
| 33 | 3481.8425 | 1741.4249 | 3464.8159 | 1732.9116 | 3463.8319 | 1732.4196 | Q | 1116.5644 | 558.7858  | 1099.5378 | 550.2726  | 1098.5538 | 549.7805  | 10 |
| 34 | 3609.9010 | 1805.4542 | 3592.8745 | 1796.9409 | 3591.8905 | 1796.4489 | Q | 988.5058  | 494.7565  | 971.4793  | 486.2433  | 970.4952  | 485.7513  | 9  |
| 35 | 3696.9331 | 1848.9702 | 3679.9065 | 1840.4569 | 3678.9225 | 1839.9649 | S | 860.4472  | 430.7272  | 843.4207  | 422.2140  | 842.4367  | 421.7220  | 8  |
| 36 | 3797.9807 | 1899.4940 | 3780.9542 | 1890.9807 | 3779.9702 | 1890.4887 | T | 773.4152  | 387.2112  | 756.3886  | 378.6980  | 755.4046  | 378.2060  | 7  |
| 37 | 3897.0492 | 1949.0282 | 3880.0226 | 1940.5149 | 3879.0386 | 1940.0229 | V | 672.3675  | 336.6874  | 655.3410  | 328.1741  | 654.3570  | 327.6821  | 6  |
| 38 | 3984.0812 | 1992.5442 | 3967.0546 | 1984.0310 | 3966.0706 | 1983.5389 | S | 573.2991  | 287.1532  | 556.2726  | 278.6399  | 555.2885  | 278.1479  | 5  |
| 39 | 4099.1081 | 2050.0577 | 4082.0816 | 2041.5444 | 4081.0976 | 2041.0524 | D | 486.2671  | 243.6372  | 469.2405  | 235.1239  | 468.2565  | 234.6319  | 4  |
| 40 | 4198.1765 | 2099.5919 | 4181.1500 | 2091.0786 | 4180.1660 | 2090.5866 | V | 371.2401  | 186.1237  | 354.2136  | 177.6104  |           |           | 3  |
| 41 | 4295.2293 | 2148.1183 | 4278.2028 | 2139.6050 | 4277.2187 | 2139.1130 | P | 272.1717  | 136.5895  | 255.1452  | 128.0762  |           |           | 2  |
| 42 |           |           |           |           |           |           | R | 175.1190  | 88.0631   | 158.0924  | 79.5498   |           |           | 1  |

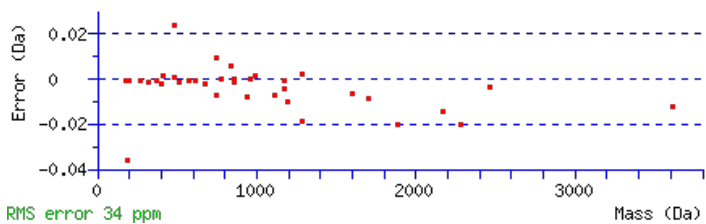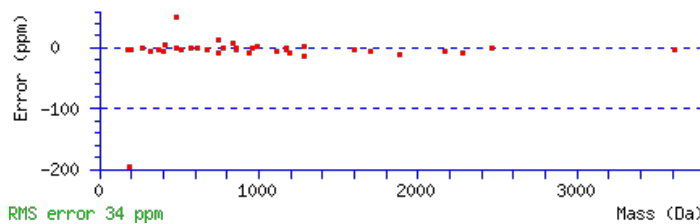

NCBI BLAST search of [NSITLTNLTGTEYVVSIVALNGREESPLLIGQOSTVSDVPR](#)  
 (Parameters: blastp, nr protein database, expect=20000, no filter, PAM30)  
 Other BLAST [web gateways](#)

All matches to this query

| Score | Mr(calc)  | Delta  | Sequence                                                  | Site Analysis         |
|-------|-----------|--------|-----------------------------------------------------------|-----------------------|
| 106.0 | 4468.3337 | 0.0005 | <a href="#">NSITLTNLTGTEYVVSIVALNGREESPLLIGQOSTVSDVPR</a> | Deamidated N22 99.91% |
| 76.5  | 4467.3497 | 0.9845 | <a href="#">NSITLTNLTGTEYVVSIVALNGREESPLLIGQOSTVSDVPR</a> |                       |
| 74.9  | 4468.3337 | 0.0005 | <a href="#">NSITLTNLTGTEYVVSIVALNGREESPLLIGQOSTVSDVPR</a> | Deamidated Q33 0.08%  |
| 66.8  | 4468.3337 | 0.0005 | <a href="#">NSITLTNLTGTEYVVSIVALNGREESPLLIGQOSTVSDVPR</a> | Deamidated Q34 0.01%  |
| 50.9  | 4468.3337 | 0.0005 | <a href="#">NSITLTNLTGTEYVVSIVALNGREESPLLIGQOSTVSDVPR</a> | Deamidated N7 0.00%   |
| 39.1  | 4468.3337 | 0.0005 | <a href="#">NSITLTNLTGTEYVVSIVALNGREESPLLIGQOSTVSDVPR</a> | Deamidated N1 0.00%   |

Mascot: <http://www.matrixscience.com/>

# Mascot Search Results

## Peptide View

MS/MS Fragmentation of **NSITLTNLTPGTEYVVSIVALNGREESPLLIQGSTVSDVPR**

Found in **P02751** in **uni\_human\_nr**, FINC\_HUMAN Fibronectin OS=Homo sapiens GN=FN1 PE=1 SV=4

Match to Query 19153: 4470.354696 from(1118.595950,4+) intensity(318403.0313) rtinseconds(3643) scans(22397) index(17446)

Title: 130801\_HPL\_Human\_Plaque\_BR1\_TR1\_07\_Spectrum039149\_scans\_22397\_RTINSECONDS=3643

Data file E:\\RAW\\HumanPlaques\\mgf\\T\\1D\\T130801\_HPL\_Human\_Plaque\_BR1\_TR1\_07.mgf

Click mouse within plot area to zoom in by factor of two about that point

Or,  to  Da  
 Label all possible matches  Label matches used for scoring   
 Show Y-axis

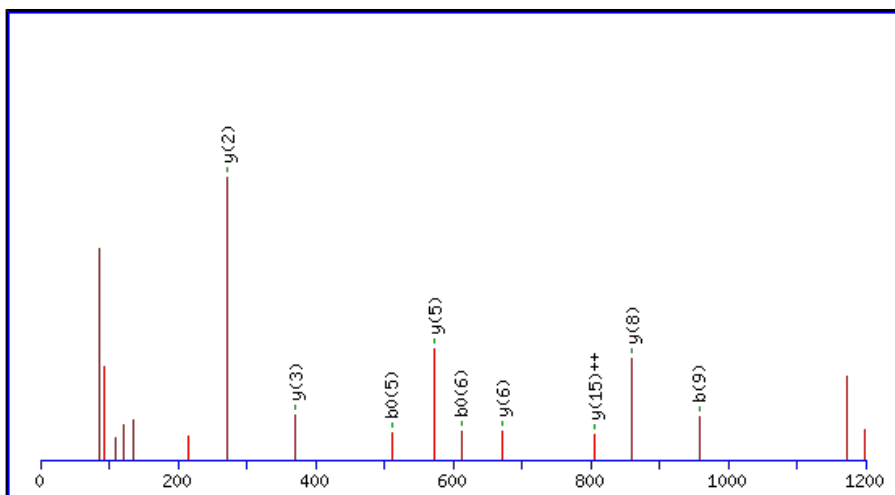

Monoisotopic mass of neutral peptide **Mr(calc): 4468.3337**

Fixed modifications: Carbamidomethyl (C) (apply to specified residues or termini only)

Variable modifications:

Q34 : Deamidated (NQ)

Ions Score: 22 Expect: 0.15

Matches : 9/484 fragment ions using 15 most intense peaks ([help](#))

| #  | b         | b <sup>++</sup> | b <sup>*</sup> | b <sup>***</sup> | b <sup>0</sup> | b <sup>0++</sup> | Seq. | y         | y <sup>++</sup> | y <sup>*</sup> | y <sup>***</sup> | y <sup>0</sup> | y <sup>0++</sup> | #  |
|----|-----------|-----------------|----------------|------------------|----------------|------------------|------|-----------|-----------------|----------------|------------------|----------------|------------------|----|
| 1  | 115.0502  | 58.0287         | 98.0237        | 49.5155          |                |                  | N    |           |                 |                |                  |                |                  | 42 |
| 2  | 202.0822  | 101.5448        | 185.0557       | 93.0315          | 184.0717       | 92.5395          | S    | 4355.2981 | 2178.1527       | 4338.2715      | 2169.6394        | 4337.2875      | 2169.1474        | 41 |
| 3  | 315.1663  | 158.0868        | 298.1397       | 149.5735         | 297.1557       | 149.0815         | I    | 4268.2660 | 2134.6367       | 4251.2395      | 2126.1234        | 4250.2555      | 2125.6314        | 40 |
| 4  | 416.2140  | 208.6106        | 399.1874       | 200.0974         | 398.2034       | 199.6053         | T    | 4155.1820 | 2078.0946       | 4138.1554      | 2069.5813        | 4137.1714      | 2069.0893        | 39 |
| 5  | 529.2980  | 265.1527        | 512.2715       | 256.6394         | 511.2875       | 256.1474         | L    | 4054.1343 | 2027.5708       | 4037.1077      | 2019.0575        | 4036.1237      | 2018.5655        | 38 |
| 6  | 630.3457  | 315.6765        | 613.3192       | 307.1632         | 612.3352       | 306.6712         | T    | 3941.0502 | 1971.0287       | 3924.0237      | 1962.5155        | 3923.0397      | 1962.0235        | 37 |
| 7  | 744.3886  | 372.6980        | 727.3621       | 364.1847         | 726.3781       | 363.6927         | N    | 3840.0025 | 1920.5049       | 3822.9760      | 1911.9916        | 3821.9920      | 1911.4996        | 36 |
| 8  | 857.4727  | 429.2400        | 840.4462       | 420.7267         | 839.4621       | 420.2347         | L    | 3725.9596 | 1863.4834       | 3708.9331      | 1854.9702        | 3707.9490      | 1854.4782        | 35 |
| 9  | 958.5204  | 479.7638        | 941.4938       | 471.2506         | 940.5098       | 470.7585         | T    | 3612.8756 | 1806.9414       | 3595.8490      | 1798.4281        | 3594.8650      | 1797.9361        | 34 |
| 10 | 1055.5732 | 528.2902        | 1038.5466      | 519.7769         | 1037.5626      | 519.2849         | P    | 3511.8279 | 1756.4176       | 3494.8013      | 1747.9043        | 3493.8173      | 1747.4123        | 33 |
| 11 | 1112.5946 | 556.8009        | 1095.5681      | 548.2877         | 1094.5840      | 547.7957         | G    | 3414.7751 | 1707.8912       | 3397.7486      | 1699.3779        | 3396.7645      | 1698.8859        | 32 |
| 12 | 1213.6423 | 607.3248        | 1196.6157      | 598.8115         | 1195.6317      | 598.3195         | T    | 3357.7536 | 1679.3805       | 3340.7271      | 1670.8672        | 3339.7431      | 1670.3752        | 31 |
| 13 | 1342.6849 | 671.8461        | 1325.6583      | 663.3328         | 1324.6743      | 662.8408         | E    | 3256.7060 | 1628.8566       | 3239.6794      | 1620.3433        | 3238.6954      | 1619.8513        | 30 |
| 14 | 1505.7482 | 753.3777        | 1488.7217      | 744.8645         | 1487.7377      | 744.3725         | Y    | 3127.6634 | 1564.3353       | 3110.6368      | 1555.8220        | 3109.6528      | 1555.3300        | 29 |
| 15 | 1604.8166 | 802.9120        | 1587.7901      | 794.3987         | 1586.8061      | 793.9067         | V    | 2964.6000 | 1482.8037       | 2947.5735      | 1474.2904        | 2946.5895      | 1473.7984        | 28 |
| 16 | 1703.8850 | 852.4462        | 1686.8585      | 843.9329         | 1685.8745      | 843.4409         | V    | 2865.5316 | 1433.2695       | 2848.5051      | 1424.7562        | 2847.5211      | 1424.2642        | 27 |
| 17 | 1790.9171 | 895.9622        | 1773.8905      | 887.4489         | 1772.9065      | 886.9569         | S    | 2766.4632 | 1383.7352       | 2749.4367      | 1375.2220        | 2748.4526      | 1374.7300        | 26 |
| 18 | 1904.0011 | 952.5042        | 1886.9746      | 943.9909         | 1885.9906      | 943.4989         | I    | 2679.4312 | 1340.2192       | 2662.4046      | 1331.7060        | 2661.4206      | 1331.2139        | 25 |



|    |           |           |           |           |           |           |   |           |           |           |           |           |           |    |
|----|-----------|-----------|-----------|-----------|-----------|-----------|---|-----------|-----------|-----------|-----------|-----------|-----------|----|
| 19 | 2003.0696 | 1002.0384 | 1986.0430 | 993.5251  | 1985.0590 | 993.0331  | V | 2566.3471 | 1283.6772 | 2549.3206 | 1275.1639 | 2548.3366 | 1274.6719 | 24 |
| 20 | 2074.1067 | 1037.5570 | 2057.0801 | 1029.0437 | 2056.0961 | 1028.5517 | A | 2467.2787 | 1234.1430 | 2450.2522 | 1225.6297 | 2449.2681 | 1225.1377 | 23 |
| 21 | 2187.1907 | 1094.0990 | 2170.1642 | 1085.5857 | 2169.1802 | 1085.0937 | L | 2396.2416 | 1198.6244 | 2379.2150 | 1190.1112 | 2378.2310 | 1189.6192 | 22 |
| 22 | 2301.2337 | 1151.1205 | 2284.2071 | 1142.6072 | 2283.2231 | 1142.1152 | N | 2283.1575 | 1142.0824 | 2266.1310 | 1133.5691 | 2265.1470 | 1133.0771 | 21 |
| 23 | 2358.2551 | 1179.6312 | 2341.2286 | 1171.1179 | 2340.2446 | 1170.6259 | G | 2169.1146 | 1085.0609 | 2152.0881 | 1076.5477 | 2151.1040 | 1076.0557 | 20 |
| 24 | 2514.3562 | 1257.6818 | 2497.3297 | 1249.1685 | 2496.3457 | 1248.6765 | R | 2112.0931 | 1056.5502 | 2095.0666 | 1048.0369 | 2094.0826 | 1047.5449 | 19 |
| 25 | 2643.3988 | 1322.2030 | 2626.3723 | 1313.6898 | 2625.3883 | 1313.1978 | E | 1955.9920 | 978.4997  | 1938.9655 | 969.9864  | 1937.9815 | 969.4944  | 18 |
| 26 | 2772.4414 | 1386.7243 | 2755.4149 | 1378.2111 | 2754.4309 | 1377.7191 | E | 1826.9494 | 913.9784  | 1809.9229 | 905.4651  | 1808.9389 | 904.9731  | 17 |
| 27 | 2859.4734 | 1430.2404 | 2842.4469 | 1421.7271 | 2841.4629 | 1421.2351 | S | 1697.9068 | 849.4571  | 1680.8803 | 840.9438  | 1679.8963 | 840.4518  | 16 |
| 28 | 2956.5262 | 1478.7667 | 2939.4997 | 1470.2535 | 2938.5156 | 1469.7615 | P | 1610.8748 | 805.9410  | 1593.8483 | 797.4278  | 1592.8642 | 796.9358  | 15 |
| 29 | 3069.6103 | 1535.3088 | 3052.5837 | 1526.7955 | 3051.5997 | 1526.3035 | L | 1513.8221 | 757.4147  | 1496.7955 | 748.9014  | 1495.8115 | 748.4094  | 14 |
| 30 | 3182.6943 | 1591.8508 | 3165.6678 | 1583.3375 | 3164.6838 | 1582.8455 | L | 1400.7380 | 700.8726  | 1383.7114 | 692.3594  | 1382.7274 | 691.8673  | 13 |
| 31 | 3295.7784 | 1648.3928 | 3278.7519 | 1639.8796 | 3277.7678 | 1639.3876 | I | 1287.6539 | 644.3306  | 1270.6274 | 635.8173  | 1269.6434 | 635.3253  | 12 |
| 32 | 3352.7999 | 1676.9036 | 3335.7733 | 1668.3903 | 3334.7893 | 1667.8983 | G | 1174.5699 | 587.7886  | 1157.5433 | 579.2753  | 1156.5593 | 578.7833  | 11 |
| 33 | 3480.8584 | 1740.9329 | 3463.8319 | 1732.4196 | 3462.8479 | 1731.9276 | Q | 1117.5484 | 559.2778  | 1100.5218 | 550.7646  | 1099.5378 | 550.2726  | 10 |
| 34 | 3609.9010 | 1805.4542 | 3592.8745 | 1796.9409 | 3591.8905 | 1796.4489 | Q | 989.4898  | 495.2485  | 972.4633  | 486.7353  | 971.4793  | 486.2433  | 9  |
| 35 | 3696.9331 | 1848.9702 | 3679.9065 | 1840.4569 | 3678.9225 | 1839.9649 | S | 860.4472  | 430.7272  | 843.4207  | 422.2140  | 842.4367  | 421.7220  | 8  |
| 36 | 3797.9807 | 1899.4940 | 3780.9542 | 1890.9807 | 3779.9702 | 1890.4887 | T | 773.4152  | 387.2112  | 756.3886  | 378.6980  | 755.4046  | 378.2060  | 7  |
| 37 | 3897.0492 | 1949.0282 | 3880.0226 | 1940.5149 | 3879.0386 | 1940.0229 | V | 672.3675  | 336.6874  | 655.3410  | 328.1741  | 654.3570  | 327.6821  | 6  |
| 38 | 3984.0812 | 1992.5442 | 3967.0546 | 1984.0310 | 3966.0706 | 1983.5389 | S | 573.2991  | 287.1532  | 556.2726  | 278.6399  | 555.2885  | 278.1479  | 5  |
| 39 | 4099.1081 | 2050.0577 | 4082.0816 | 2041.5444 | 4081.0976 | 2041.0524 | D | 486.2671  | 243.6372  | 469.2405  | 235.1239  | 468.2565  | 234.6319  | 4  |
| 40 | 4198.1765 | 2099.5919 | 4181.1500 | 2091.0786 | 4180.1660 | 2090.5866 | V | 371.2401  | 186.1237  | 354.2136  | 177.6104  |           |           | 3  |
| 41 | 4295.2293 | 2148.1183 | 4278.2028 | 2139.6050 | 4277.2187 | 2139.1130 | P | 272.1717  | 136.5895  | 255.1452  | 128.0762  |           |           | 2  |
| 42 |           |           |           |           |           |           | R | 175.1190  | 88.0631   | 158.0924  | 79.5498   |           |           | 1  |

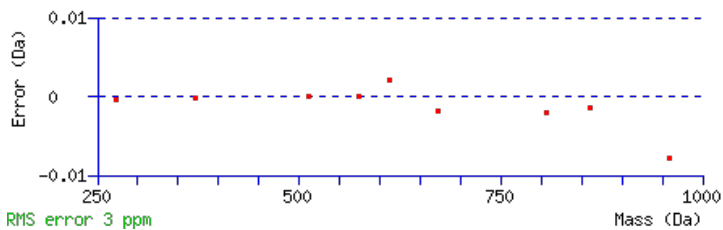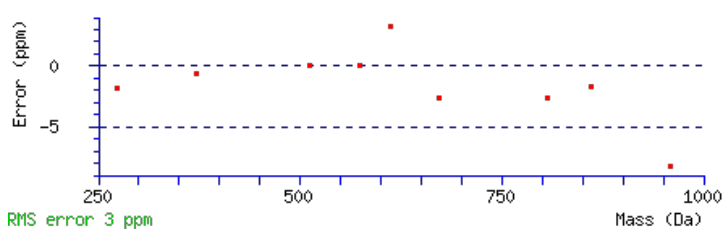

NCBI BLAST search of [NSITLTNLTGTEYVVSIVALNGREESPLLIGQOSTVSDVPR](#)  
 (Parameters: blastp, nr protein database, expect=20000, no filter, PAM30)  
 Other BLAST [web gateways](#)

All matches to this query

| Score | Mr(calc)  | Delta   | Sequence                                                  |
|-------|-----------|---------|-----------------------------------------------------------|
| 21.6  | 4468.3337 | 2.0210  | <a href="#">NSITLTNLTGTEYVVSIVALNGREESPLLIGQOSTVSDVPR</a> |
| 21.6  | 4468.3337 | 2.0210  | <a href="#">NSITLTNLTGTEYVVSIVALNGREESPLLIGQOSTVSDVPR</a> |
| 20.0  | 4468.3337 | 2.0210  | <a href="#">NSITLTNLTGTEYVVSIVALNGREESPLLIGQOSTVSDVPR</a> |
| 12.8  | 4468.3337 | 2.0210  | <a href="#">NSITLTNLTGTEYVVSIVALNGREESPLLIGQOSTVSDVPR</a> |
| 12.8  | 4468.3337 | 2.0210  | <a href="#">NSITLTNLTGTEYVVSIVALNGREESPLLIGQOSTVSDVPR</a> |
| 1.9   | 4470.3645 | -0.0098 | <a href="#">GSEAIATLSLSNNQLSYLPPSLPPSLERLHLQNNLISKVPR</a> |
| 1.9   | 4470.3645 | -0.0098 | <a href="#">GSEAIATLSLSNNQLSYLPPSLPPSLERLHLQNNLISKVPR</a> |
| 1.9   | 4470.3645 | -0.0098 | <a href="#">GSEAIATLSLSNNQLSYLPPSLPPSLERLHLQNNLISKVPR</a> |
| 1.9   | 4470.3645 | -0.0098 | <a href="#">GSEAIATLSLSNNQLSYLPPSLPPSLERLHLQNNLISKVPR</a> |
| 1.9   | 4470.3645 | -0.0098 | <a href="#">GSEAIATLSLSNNQLSYLPPSLPPSLERLHLQNNLISKVPR</a> |

# Mascot Search Results

## Peptide View

MS/MS Fragmentation of **NSITLTNLTPGTEYVVSIVALNGREESPLLIQGSTVSDVPR**

Found in **P02751** in **uni\_human\_nr**, FINC\_HUMAN Fibronectin OS=Homo sapiens GN=FN1 PE=1 SV=4

Match to Query 22330: 4467.349816 from(1117.844730,4+) intensity(1484667.1250) rtinseconds(3623) scans(24220) index(19962)

Title: 130806\_HPL\_Human\_Plaque\_BR1\_TR2\_03\_Spectrum043901\_scans\_24220\_RTINSECONDS=3623

Data file E:\\RAW\\HumanPlaques\\imgf\\T\\1D\\T130806\_HPL\_Human\_Plaque\_BR1\_TR2\_03.mgf

Click mouse within plot area to zoom in by factor of two about that point

Or, to Da

Label all possible matches Label matches used for scoring

Show Y-axis

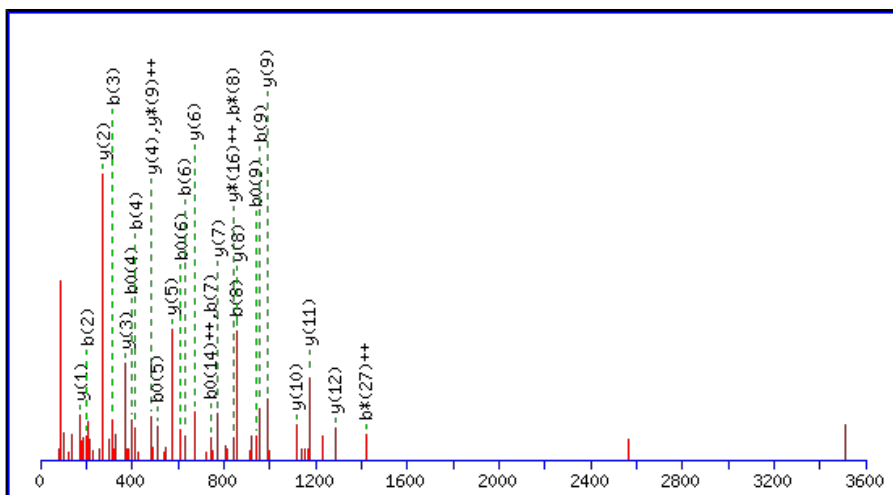

Monoisotopic mass of neutral peptide Mr(calc): 4467.3497

Fixed modifications: Carbamidomethyl (C) (apply to specified residues or termini only)

Ions Score: 81 Expect: 2.1e-007

Matches : 28/484 fragment ions using 38 most intense peaks ([help](#))

| #  | b               | b <sup>++</sup> | b <sup>*</sup>  | b <sup>*++</sup> | b <sup>0</sup>  | b <sup>0++</sup> | Seq. | y         | y <sup>++</sup> | y <sup>*</sup> | y <sup>*++</sup> | y <sup>0</sup> | y <sup>0++</sup> | #  |
|----|-----------------|-----------------|-----------------|------------------|-----------------|------------------|------|-----------|-----------------|----------------|------------------|----------------|------------------|----|
| 1  | 115.0502        | 58.0287         | 98.0237         | 49.5155          |                 |                  | N    |           |                 |                |                  |                |                  | 42 |
| 2  | <b>202.0822</b> | 101.5448        | 185.0557        | 93.0315          | 184.0717        | 92.5395          | S    | 4354.3140 | 2177.6607       | 4337.2875      | 2169.1474        | 4336.3035      | 2168.6554        | 41 |
| 3  | <b>315.1663</b> | 158.0868        | 298.1397        | 149.5735         | 297.1557        | 149.0815         | I    | 4267.2820 | 2134.1446       | 4250.2555      | 2125.6314        | 4249.2714      | 2125.1394        | 40 |
| 4  | <b>416.2140</b> | 208.6106        | 399.1874        | 200.0974         | <b>398.2034</b> | 199.6053         | T    | 4154.1979 | 2077.6026       | 4137.1714      | 2069.0893        | 4136.1874      | 2068.5973        | 39 |
| 5  | 529.2980        | 265.1527        | 512.2715        | 256.6394         | <b>511.2875</b> | 256.1474         | L    | 4053.1503 | 2027.0788       | 4036.1237      | 2018.5655        | 4035.1397      | 2018.0735        | 38 |
| 6  | <b>630.3457</b> | 315.6765        | 613.3192        | 307.1632         | <b>612.3352</b> | 306.6712         | T    | 3940.0662 | 1970.5367       | 3923.0397      | 1962.0235        | 3922.0556      | 1961.5315        | 37 |
| 7  | <b>744.3886</b> | 372.6980        | 727.3621        | 364.1847         | 726.3781        | 363.6927         | N    | 3839.0185 | 1920.0129       | 3821.9920      | 1911.4996        | 3821.0080      | 1911.0076        | 36 |
| 8  | <b>857.4727</b> | 429.2400        | <b>840.4462</b> | 420.7267         | 839.4621        | 420.2347         | L    | 3724.9756 | 1862.9914       | 3707.9490      | 1854.4782        | 3706.9650      | 1853.9862        | 35 |
| 9  | <b>958.5204</b> | 479.7638        | 941.4938        | 471.2506         | <b>940.5098</b> | 470.7585         | T    | 3611.8915 | 1806.4494       | 3594.8650      | 1797.9361        | 3593.8810      | 1797.4441        | 34 |
| 10 | 1055.5732       | 528.2902        | 1038.5466       | 519.7769         | 1037.5626       | 519.2849         | P    | 3510.8439 | 1755.9256       | 3493.8173      | 1747.4123        | 3492.8333      | 1746.9203        | 33 |
| 11 | 1112.5946       | 556.8009        | 1095.5681       | 548.2877         | 1094.5840       | 547.7957         | G    | 3413.7911 | 1707.3992       | 3396.7645      | 1698.8859        | 3395.7805      | 1698.3939        | 32 |
| 12 | 1213.6423       | 607.3248        | 1196.6157       | 598.8115         | 1195.6317       | 598.3195         | T    | 3356.7696 | 1678.8885       | 3339.7431      | 1670.3752        | 3338.7591      | 1669.8832        | 31 |
| 13 | 1342.6849       | 671.8461        | 1325.6583       | 663.3328         | 1324.6743       | 662.8408         | E    | 3255.7219 | 1628.3646       | 3238.6954      | 1619.8513        | 3237.7114      | 1619.3593        | 30 |
| 14 | 1505.7482       | 753.3777        | 1488.7217       | 744.8645         | 1487.7377       | <b>744.3725</b>  | Y    | 3126.6794 | 1563.8433       | 3109.6528      | 1555.3300        | 3108.6688      | 1554.8380        | 29 |
| 15 | 1604.8166       | 802.9120        | 1587.7901       | 794.3987         | 1586.8061       | 793.9067         | V    | 2963.6160 | 1482.3117       | 2946.5895      | 1473.7984        | 2945.6055      | 1473.3064        | 28 |
| 16 | 1703.8850       | 852.4462        | 1686.8585       | 843.9329         | 1685.8745       | 843.4409         | V    | 2864.5476 | 1432.7774       | 2847.5211      | 1424.2642        | 2846.5370      | 1423.7722        | 27 |
| 17 | 1790.9171       | 895.9622        | 1773.8905       | 887.4489         | 1772.9065       | 886.9569         | S    | 2765.4792 | 1383.2432       | 2748.4526      | 1374.7300        | 2747.4686      | 1374.2380        | 26 |
| 18 | 1904.0011       | 952.5042        | 1886.9746       | 943.9909         | 1885.9906       | 943.4989         | I    | 2678.4472 | 1339.7272       | 2661.4206      | 1331.2139        | 2660.4366      | 1330.7219        | 25 |
| 19 | 2003.0696       | 1002.0384       | 1986.0430       | 993.5251         | 1985.0590       | 993.0331         | V    | 2565.3631 | 1283.1852       | 2548.3366      | 1274.6719        | 2547.3525      | 1274.1799        | 24 |

|    |           |           |           |           |           |           |   |           |           |           |           |           |           |    |
|----|-----------|-----------|-----------|-----------|-----------|-----------|---|-----------|-----------|-----------|-----------|-----------|-----------|----|
| 20 | 2074.1067 | 1037.5570 | 2057.0801 | 1029.0437 | 2056.0961 | 1028.5517 | A | 2466.2947 | 1233.6510 | 2449.2681 | 1225.1377 | 2448.2841 | 1224.6457 | 23 |
| 21 | 2187.1907 | 1094.0990 | 2170.1642 | 1085.5857 | 2169.1802 | 1085.0937 | L | 2395.2576 | 1198.1324 | 2378.2310 | 1189.6192 | 2377.2470 | 1189.1271 | 22 |
| 22 | 2301.2337 | 1151.1205 | 2284.2071 | 1142.6072 | 2283.2231 | 1142.1152 | N | 2282.1735 | 1141.5904 | 2265.1470 | 1133.0771 | 2264.1629 | 1132.5851 | 21 |
| 23 | 2358.2551 | 1179.6312 | 2341.2286 | 1171.1179 | 2340.2446 | 1170.6259 | G | 2168.1306 | 1084.5689 | 2151.1040 | 1076.0557 | 2150.1200 | 1075.5636 | 20 |
| 24 | 2514.3562 | 1257.6818 | 2497.3297 | 1249.1685 | 2496.3457 | 1248.6765 | R | 2111.1091 | 1056.0582 | 2094.0826 | 1047.5449 | 2093.0986 | 1047.0529 | 19 |
| 25 | 2643.3988 | 1322.2030 | 2626.3723 | 1313.6898 | 2625.3883 | 1313.1978 | E | 1955.0080 | 978.0076  | 1937.9815 | 969.4944  | 1936.9974 | 969.0024  | 18 |
| 26 | 2772.4414 | 1386.7243 | 2755.4149 | 1378.2111 | 2754.4309 | 1377.7191 | E | 1825.9654 | 913.4863  | 1808.9389 | 904.9731  | 1807.9549 | 904.4811  | 17 |
| 27 | 2859.4734 | 1430.2404 | 2842.4469 | 1421.7271 | 2841.4629 | 1421.2351 | S | 1696.9228 | 848.9651  | 1679.8963 | 840.4518  | 1678.9123 | 839.9598  | 16 |
| 28 | 2956.5262 | 1478.7667 | 2939.4997 | 1470.2535 | 2938.5156 | 1469.7615 | P | 1609.8908 | 805.4490  | 1592.8642 | 796.9358  | 1591.8802 | 796.4438  | 15 |
| 29 | 3069.6103 | 1535.3088 | 3052.5837 | 1526.7955 | 3051.5997 | 1526.3035 | L | 1512.8380 | 756.9227  | 1495.8115 | 748.4094  | 1494.8275 | 747.9174  | 14 |
| 30 | 3182.6943 | 1591.8508 | 3165.6678 | 1583.3375 | 3164.6838 | 1582.8455 | L | 1399.7540 | 700.3806  | 1382.7274 | 691.8673  | 1381.7434 | 691.3753  | 13 |
| 31 | 3295.7784 | 1648.3928 | 3278.7519 | 1639.8796 | 3277.7678 | 1639.3876 | I | 1286.6699 | 643.8386  | 1269.6434 | 635.3253  | 1268.6593 | 634.8333  | 12 |
| 32 | 3352.7999 | 1676.9036 | 3335.7733 | 1668.3903 | 3334.7893 | 1667.8983 | G | 1173.5858 | 587.2966  | 1156.5593 | 578.7833  | 1155.5753 | 578.2913  | 11 |
| 33 | 3480.8584 | 1740.9329 | 3463.8319 | 1732.4196 | 3462.8479 | 1731.9276 | Q | 1116.5644 | 558.7858  | 1099.5378 | 550.2726  | 1098.5538 | 549.7805  | 10 |
| 34 | 3608.9170 | 1804.9621 | 3591.8905 | 1796.4489 | 3590.9065 | 1795.9569 | Q | 988.5058  | 494.7565  | 971.4793  | 486.2433  | 970.4952  | 485.7513  | 9  |
| 35 | 3695.9490 | 1848.4782 | 3678.9225 | 1839.9649 | 3677.9385 | 1839.4729 | S | 860.4472  | 430.7272  | 843.4207  | 422.2140  | 842.4367  | 421.7220  | 8  |
| 36 | 3796.9967 | 1899.0020 | 3779.9702 | 1890.4887 | 3778.9862 | 1889.9967 | T | 773.4152  | 387.2112  | 756.3886  | 378.6980  | 755.4046  | 378.2060  | 7  |
| 37 | 3896.0651 | 1948.5362 | 3879.0386 | 1940.0229 | 3878.0546 | 1939.5309 | V | 672.3675  | 336.6874  | 655.3410  | 328.1741  | 654.3570  | 327.6821  | 6  |
| 38 | 3983.0972 | 1992.0522 | 3966.0706 | 1983.5389 | 3965.0866 | 1983.0469 | S | 573.2991  | 287.1532  | 556.2726  | 278.6399  | 555.2885  | 278.1479  | 5  |
| 39 | 4098.1241 | 2049.5657 | 4081.0976 | 2041.0524 | 4080.1135 | 2040.5604 | D | 486.2671  | 243.6372  | 469.2405  | 235.1239  | 468.2565  | 234.6319  | 4  |
| 40 | 4197.1925 | 2099.0999 | 4180.1660 | 2090.5866 | 4179.1820 | 2090.0946 | V | 371.2401  | 186.1237  | 354.2136  | 177.6104  |           |           | 3  |
| 41 | 4294.2453 | 2147.6263 | 4277.2187 | 2139.1130 | 4276.2347 | 2138.6210 | P | 272.1717  | 136.5895  | 255.1452  | 128.0762  |           |           | 2  |
| 42 |           |           |           |           |           |           | R | 175.1190  | 88.0631   | 158.0924  | 79.5498   |           |           | 1  |

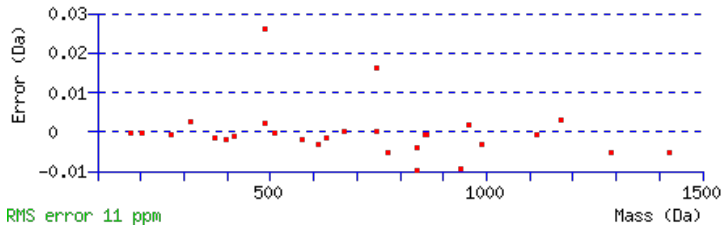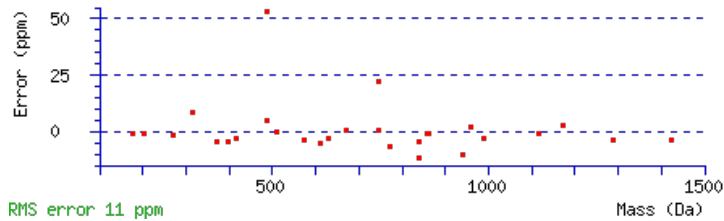

NCBI BLAST search of [NSITLTNLTGTEYVVSIVALNGREESPLLIGQSTVSDVPR](#)  
 (Parameters: blastp, nr protein database, expect=20000, no filter, PAM30)  
 Other BLAST [web gateways](#)

All matches to this query

| Score | Mr(calc)  | Delta  | Sequence                                                 |
|-------|-----------|--------|----------------------------------------------------------|
| 80.8  | 4467.3497 | 0.0001 | <a href="#">NSITLTNLTGTEYVVSIVALNGREESPLLIGQSTVSDVPR</a> |

Mascot: <http://www.matrixscience.com/>

# Mascot Search Results

## Peptide View

MS/MS Fragmentation of **NSITLTNLTPGTEYVVSIVALNGREESPLLIQGSTVSDVPR**

Found in **P02751** in **uni\_human\_nr**, FINC\_HUMAN Fibronectin OS=Homo sapiens GN=FN1 PE=1 SV=4

Match to Query 18278: 4468.337172 from(1490.453000,3+) intensity(333788.7813) rtinseconds(3647) scans(22038) index(16795)

Title: 130801\_HPL\_Human\_Plaque\_BR1\_TR1\_08\_Spectrum038071\_scans\_22038\_RTINSECONDS=3647

Data file E:\\RAW\\HumanPlaques\\imgf\\T\\1D\\T130801\_HPL\_Human\_Plaque\_BR1\_TR1\_08.mgf

Click mouse within plot area to zoom in by factor of two about that point

Or,  to  Da  
 Label all possible matches  Label matches used for scoring   
 Show Y-axis

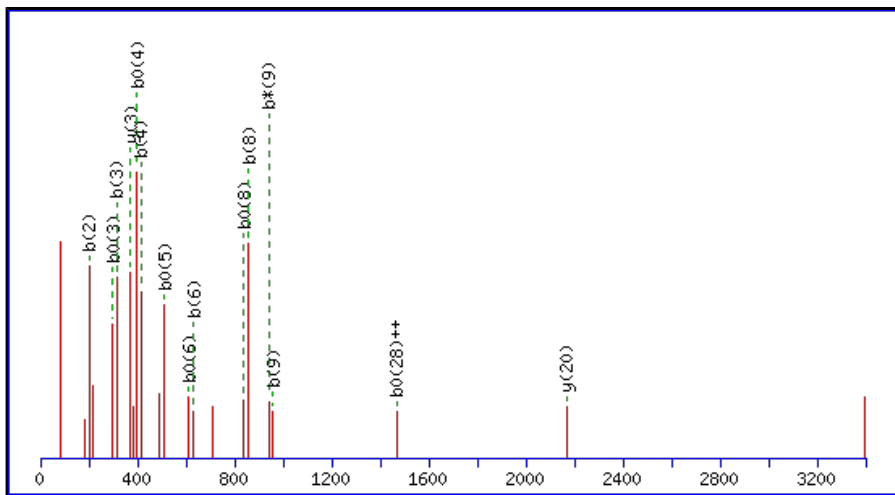

Monoisotopic mass of neutral peptide **Mr(calc): 4467.3497**

Fixed modifications: Carbamidomethyl (C) (apply to specified residues or termini only)

Ions Score: 30 Expect: 0.024

Matches : 15/484 fragment ions using 21 most intense peaks ([help](#))

| #  | b               | b <sup>++</sup> | b <sup>*</sup>  | b <sup>*++</sup> | b <sup>0</sup>  | b <sup>0++</sup> | Seq. | y         | y <sup>++</sup> | y <sup>*</sup> | y <sup>*++</sup> | y <sup>0</sup> | y <sup>0++</sup> | #  |
|----|-----------------|-----------------|-----------------|------------------|-----------------|------------------|------|-----------|-----------------|----------------|------------------|----------------|------------------|----|
| 1  | 115.0502        | 58.0287         | 98.0237         | 49.5155          |                 |                  | N    |           |                 |                |                  |                |                  | 42 |
| 2  | <b>202.0822</b> | 101.5448        | 185.0557        | 93.0315          | 184.0717        | 92.5395          | S    | 4354.3140 | 2177.6607       | 4337.2875      | 2169.1474        | 4336.3035      | 2168.6554        | 41 |
| 3  | <b>315.1663</b> | 158.0868        | 298.1397        | 149.5735         | <b>297.1557</b> | 149.0815         | I    | 4267.2820 | 2134.1446       | 4250.2555      | 2125.6314        | 4249.2714      | 2125.1394        | 40 |
| 4  | <b>416.2140</b> | 208.6106        | 399.1874        | 200.0974         | <b>398.2034</b> | 199.6053         | T    | 4154.1979 | 2077.6026       | 4137.1714      | 2069.0893        | 4136.1874      | 2068.5973        | 39 |
| 5  | 529.2980        | 265.1527        | 512.2715        | 256.6394         | <b>511.2875</b> | 256.1474         | L    | 4053.1503 | 2027.0788       | 4036.1237      | 2018.5655        | 4035.1397      | 2018.0735        | 38 |
| 6  | <b>630.3457</b> | 315.6765        | 613.3192        | 307.1632         | <b>612.3352</b> | 306.6712         | T    | 3940.0662 | 1970.5367       | 3923.0397      | 1962.0235        | 3922.0556      | 1961.5315        | 37 |
| 7  | 744.3886        | 372.6980        | 727.3621        | 364.1847         | 726.3781        | 363.6927         | N    | 3839.0185 | 1920.0129       | 3821.9920      | 1911.4996        | 3821.0080      | 1911.0076        | 36 |
| 8  | <b>857.4727</b> | 429.2400        | 840.4462        | 420.7267         | <b>839.4621</b> | 420.2347         | L    | 3724.9756 | 1862.9914       | 3707.9490      | 1854.4782        | 3706.9650      | 1853.9862        | 35 |
| 9  | <b>958.5204</b> | 479.7638        | <b>941.4938</b> | 471.2506         | 940.5098        | 470.7585         | T    | 3611.8915 | 1806.4494       | 3594.8650      | 1797.9361        | 3593.8810      | 1797.4441        | 34 |
| 10 | 1055.5732       | 528.2902        | 1038.5466       | 519.7769         | 1037.5626       | 519.2849         | P    | 3510.8439 | 1755.9256       | 3493.8173      | 1747.4123        | 3492.8333      | 1746.9203        | 33 |
| 11 | 1112.5946       | 556.8009        | 1095.5681       | 548.2877         | 1094.5840       | 547.7957         | G    | 3413.7911 | 1707.3992       | 3396.7645      | 1698.8859        | 3395.7805      | 1698.3939        | 32 |
| 12 | 1213.6423       | 607.3248        | 1196.6157       | 598.8115         | 1195.6317       | 598.3195         | T    | 3356.7696 | 1678.8885       | 3339.7431      | 1670.3752        | 3338.7591      | 1669.8832        | 31 |
| 13 | 1342.6849       | 671.8461        | 1325.6583       | 663.3328         | 1324.6743       | 662.8408         | E    | 3255.7219 | 1628.3646       | 3238.6954      | 1619.8513        | 3237.7114      | 1619.3593        | 30 |
| 14 | 1505.7482       | 753.3777        | 1488.7217       | 744.8645         | 1487.7377       | 744.3725         | Y    | 3126.6794 | 1563.8433       | 3109.6528      | 1555.3300        | 3108.6688      | 1554.8380        | 29 |
| 15 | 1604.8166       | 802.9120        | 1587.7901       | 794.3987         | 1586.8061       | 793.9067         | V    | 2963.6160 | 1482.3117       | 2946.5895      | 1473.7984        | 2945.6055      | 1473.3064        | 28 |
| 16 | 1703.8850       | 852.4462        | 1686.8585       | 843.9329         | 1685.8745       | 843.4409         | V    | 2864.5476 | 1432.7774       | 2847.5211      | 1424.2642        | 2846.5370      | 1423.7722        | 27 |
| 17 | 1790.9171       | 895.9622        | 1773.8905       | 887.4489         | 1772.9065       | 886.9569         | S    | 2765.4792 | 1383.2432       | 2748.4526      | 1374.7300        | 2747.4686      | 1374.2380        | 26 |
| 18 | 1904.0011       | 952.5042        | 1886.9746       | 943.9909         | 1885.9906       | 943.4989         | I    | 2678.4472 | 1339.7272       | 2661.4206      | 1331.2139        | 2660.4366      | 1330.7219        | 25 |
| 19 | 2003.0696       | 1002.0384       | 1986.0430       | 993.5251         | 1985.0590       | 993.0331         | V    | 2565.3631 | 1283.1852       | 2548.3366      | 1274.6719        | 2547.3525      | 1274.1799        | 24 |

|    |           |           |           |           |           |                  |   |                  |           |           |           |           |           |    |
|----|-----------|-----------|-----------|-----------|-----------|------------------|---|------------------|-----------|-----------|-----------|-----------|-----------|----|
| 20 | 2074.1067 | 1037.5570 | 2057.0801 | 1029.0437 | 2056.0961 | 1028.5517        | A | 2466.2947        | 1233.6510 | 2449.2681 | 1225.1377 | 2448.2841 | 1224.6457 | 23 |
| 21 | 2187.1907 | 1094.0990 | 2170.1642 | 1085.5857 | 2169.1802 | 1085.0937        | L | 2395.2576        | 1198.1324 | 2378.2310 | 1189.6192 | 2377.2470 | 1189.1271 | 22 |
| 22 | 2301.2337 | 1151.1205 | 2284.2071 | 1142.6072 | 2283.2231 | 1142.1152        | N | 2282.1735        | 1141.5904 | 2265.1470 | 1133.0771 | 2264.1629 | 1132.5851 | 21 |
| 23 | 2358.2551 | 1179.6312 | 2341.2286 | 1171.1179 | 2340.2446 | 1170.6259        | G | <b>2168.1306</b> | 1084.5689 | 2151.1040 | 1076.0557 | 2150.1200 | 1075.5636 | 20 |
| 24 | 2514.3562 | 1257.6818 | 2497.3297 | 1249.1685 | 2496.3457 | 1248.6765        | R | 2111.1091        | 1056.0582 | 2094.0826 | 1047.5449 | 2093.0986 | 1047.0529 | 19 |
| 25 | 2643.3988 | 1322.2030 | 2626.3723 | 1313.6898 | 2625.3883 | 1313.1978        | E | 1955.0080        | 978.0076  | 1937.9815 | 969.4944  | 1936.9974 | 969.0024  | 18 |
| 26 | 2772.4414 | 1386.7243 | 2755.4149 | 1378.2111 | 2754.4309 | 1377.7191        | E | 1825.9654        | 913.4863  | 1808.9389 | 904.9731  | 1807.9549 | 904.4811  | 17 |
| 27 | 2859.4734 | 1430.2404 | 2842.4469 | 1421.7271 | 2841.4629 | 1421.2351        | S | 1696.9228        | 848.9651  | 1679.8963 | 840.4518  | 1678.9123 | 839.9598  | 16 |
| 28 | 2956.5262 | 1478.7667 | 2939.4997 | 1470.2535 | 2938.5156 | <b>1469.7615</b> | P | 1609.8908        | 805.4490  | 1592.8642 | 796.9358  | 1591.8802 | 796.4438  | 15 |
| 29 | 3069.6103 | 1535.3088 | 3052.5837 | 1526.7955 | 3051.5997 | 1526.3035        | L | 1512.8380        | 756.9227  | 1495.8115 | 748.4094  | 1494.8275 | 747.9174  | 14 |
| 30 | 3182.6943 | 1591.8508 | 3165.6678 | 1583.3375 | 3164.6838 | 1582.8455        | L | 1399.7540        | 700.3806  | 1382.7274 | 691.8673  | 1381.7434 | 691.3753  | 13 |
| 31 | 3295.7784 | 1648.3928 | 3278.7519 | 1639.8796 | 3277.7678 | 1639.3876        | I | 1286.6699        | 643.8386  | 1269.6434 | 635.3253  | 1268.6593 | 634.8333  | 12 |
| 32 | 3352.7999 | 1676.9036 | 3335.7733 | 1668.3903 | 3334.7893 | 1667.8983        | G | 1173.5858        | 587.2966  | 1156.5593 | 578.7833  | 1155.5753 | 578.2913  | 11 |
| 33 | 3480.8584 | 1740.9329 | 3463.8319 | 1732.4196 | 3462.8479 | 1731.9276        | Q | 1116.5644        | 558.7858  | 1099.5378 | 550.2726  | 1098.5538 | 549.7805  | 10 |
| 34 | 3608.9170 | 1804.9621 | 3591.8905 | 1796.4489 | 3590.9065 | 1795.9569        | Q | 988.5058         | 494.7565  | 971.4793  | 486.2433  | 970.4952  | 485.7513  | 9  |
| 35 | 3695.9490 | 1848.4782 | 3678.9225 | 1839.9649 | 3677.9385 | 1839.4729        | S | 860.4472         | 430.7272  | 843.4207  | 422.2140  | 842.4367  | 421.7220  | 8  |
| 36 | 3796.9967 | 1899.0020 | 3779.9702 | 1890.4887 | 3778.9862 | 1889.9967        | T | 773.4152         | 387.2112  | 756.3886  | 378.6980  | 755.4046  | 378.2060  | 7  |
| 37 | 3896.0651 | 1948.5362 | 3879.0386 | 1940.0229 | 3878.0546 | 1939.5309        | V | 672.3675         | 336.6874  | 655.3410  | 328.1741  | 654.3570  | 327.6821  | 6  |
| 38 | 3983.0972 | 1992.0522 | 3966.0706 | 1983.5389 | 3965.0866 | 1983.0469        | S | 573.2991         | 287.1532  | 556.2726  | 278.6399  | 555.2885  | 278.1479  | 5  |
| 39 | 4098.1241 | 2049.5657 | 4081.0976 | 2041.0524 | 4080.1135 | 2040.5604        | D | 486.2671         | 243.6372  | 469.2405  | 235.1239  | 468.2565  | 234.6319  | 4  |
| 40 | 4197.1925 | 2099.0999 | 4180.1660 | 2090.5866 | 4179.1820 | 2090.0946        | V | <b>371.2401</b>  | 186.1237  | 354.2136  | 177.6104  |           |           | 3  |
| 41 | 4294.2453 | 2147.6263 | 4277.2187 | 2139.1130 | 4276.2347 | 2138.6210        | P | 272.1717         | 136.5895  | 255.1452  | 128.0762  |           |           | 2  |
| 42 |           |           |           |           |           |                  | R | 175.1190         | 88.0631   | 158.0924  | 79.5498   |           |           | 1  |

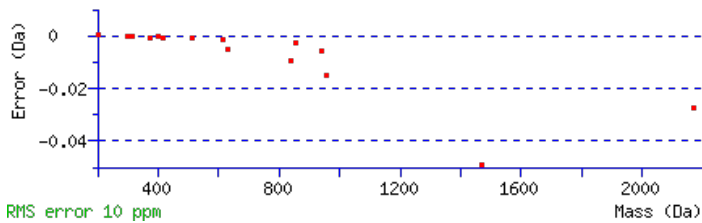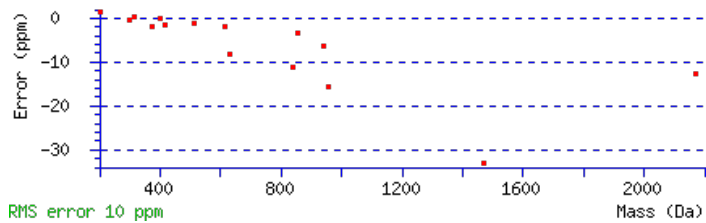

NCBI BLAST search of [NSITLTNLTGTEYVVSIVALNGREESPLLIGQSTVSDVPR](#)  
 (Parameters: blastp, nr protein database, expect=20000, no filter, PAM30)  
 Other BLAST [web gateways](#)

All matches to this query

| Score | Mr(calc)  | Delta  | Sequence                                                 |
|-------|-----------|--------|----------------------------------------------------------|
| 30.5  | 4467.3497 | 0.9875 | <a href="#">NSITLTNLTGTEYVVSIVALNGREESPLLIGQSTVSDVPR</a> |
| 28.6  | 4468.3337 | 0.0035 | <a href="#">NSITLTNLTGTEYVVSIVALNGREESPLLIGQSTVSDVPR</a> |
| 28.6  | 4468.3337 | 0.0035 | <a href="#">NSITLTNLTGTEYVVSIVALNGREESPLLIGQSTVSDVPR</a> |
| 28.6  | 4468.3337 | 0.0035 | <a href="#">NSITLTNLTGTEYVVSIVALNGREESPLLIGQSTVSDVPR</a> |
| 12.6  | 4468.3337 | 0.0035 | <a href="#">NSITLTNLTGTEYVVSIVALNGREESPLLIGQSTVSDVPR</a> |

Mascot: <http://www.matrixscience.com/>

# Mascot Search Results

## Peptide View

MS/MS Fragmentation of **QMLCTCLGNGVSCQETAVTQTYGGNSNGEPCVLPFTYNGR**

Found in **P02751** in **uni\_human\_nr**, FINC\_HUMAN Fibronectin OS=Homo sapiens GN=FN1 PE=1 SV=4

Match to Query 17469: 4456.953162 from(1486.658330,3+) intensity(198830.7813) rtinseconds(3518) scans(20619) index(15546)

Title: 130809\_HPL\_Human\_Plaque\_BR1\_TR3\_15\_Spectrum035933\_scans\_20619\_RTINSECONDS=3518

Data file E:\\RAW\\HumanPlaques\\mgf\\T\\1D\\T130809\_HPL\_Human\_Plaque\_BR1\_TR3\_15.mgf

Click mouse within plot area to zoom in by factor of two about that point

Or,  to  Da  
 Label all possible matches  Label matches used for scoring   
 Show Y-axis

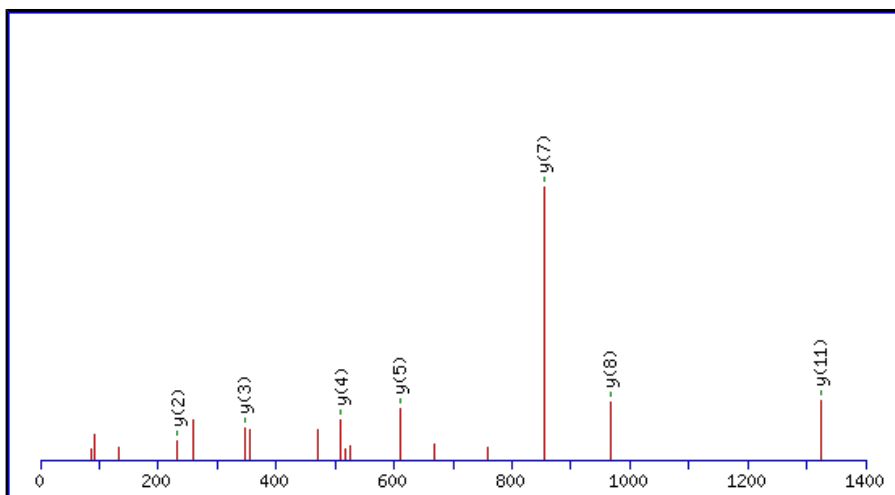

**Monoisotopic mass of neutral peptide Mr(calc):** 4455.9287

**Fixed modifications:** Carbamidomethyl (C) (apply to specified residues or termini only)

**Variable modifications:**

M2 : Oxidation (M), with neutral losses 0.0000(shown in table), 63.9983

**Ions Score:** 32 **Expect:** 0.015

**Matches :** 7/680 fragment ions using 16 most intense peaks ([help](#))

| #  | b         | b <sup>++</sup> | b <sup>*</sup> | b <sup>*++</sup> | b <sup>0</sup> | b <sup>0++</sup> | Seq. | y         | y <sup>++</sup> | y <sup>*</sup> | y <sup>*++</sup> | y <sup>0</sup> | y <sup>0++</sup> | #  |
|----|-----------|-----------------|----------------|------------------|----------------|------------------|------|-----------|-----------------|----------------|------------------|----------------|------------------|----|
| 1  | 129.0659  | 65.0366         | 112.0393       | 56.5233          |                |                  | Q    |           |                 |                |                  |                |                  | 40 |
| 2  | 276.1013  | 138.5543        | 259.0747       | 130.0410         |                |                  | M    | 4328.8774 | 2164.9423       | 4311.8508      | 2156.4291        | 4310.8668      | 2155.9370        | 39 |
| 3  | 389.1853  | 195.0963        | 372.1588       | 186.5830         |                |                  | L    | 4181.8420 | 2091.4246       | 4164.8154      | 2082.9114        | 4163.8314      | 2082.4193        | 38 |
| 4  | 549.2160  | 275.1116        | 532.1894       | 266.5983         |                |                  | C    | 4068.7579 | 2034.8826       | 4051.7314      | 2026.3693        | 4050.7474      | 2025.8773        | 37 |
| 5  | 650.2636  | 325.6355        | 633.2371       | 317.1222         | 632.2531       | 316.6302         | T    | 3908.7273 | 1954.8673       | 3891.7007      | 1946.3540        | 3890.7167      | 1945.8620        | 36 |
| 6  | 810.2943  | 405.6508        | 793.2677       | 397.1375         | 792.2837       | 396.6455         | C    | 3807.6796 | 1904.3434       | 3790.6530      | 1895.8302        | 3789.6690      | 1895.3381        | 35 |
| 7  | 923.3784  | 462.1928        | 906.3518       | 453.6795         | 905.3678       | 453.1875         | L    | 3647.6489 | 1824.3281       | 3630.6224      | 1815.8148        | 3629.6384      | 1815.3228        | 34 |
| 8  | 980.3998  | 490.7035        | 963.3733       | 482.1903         | 962.3893       | 481.6983         | G    | 3534.5649 | 1767.7861       | 3517.5383      | 1759.2728        | 3516.5543      | 1758.7808        | 33 |
| 9  | 1094.4428 | 547.7250        | 1077.4162      | 539.2117         | 1076.4322      | 538.7197         | N    | 3477.5434 | 1739.2753       | 3460.5169      | 1730.7621        | 3459.5328      | 1730.2701        | 32 |
| 10 | 1151.4642 | 576.2357        | 1134.4377      | 567.7225         | 1133.4536      | 567.2305         | G    | 3363.5005 | 1682.2539       | 3346.4739      | 1673.7406        | 3345.4899      | 1673.2486        | 31 |
| 11 | 1250.5326 | 625.7700        | 1233.5061      | 617.2567         | 1232.5221      | 616.7647         | V    | 3306.4790 | 1653.7431       | 3289.4525      | 1645.2299        | 3288.4685      | 1644.7379        | 30 |
| 12 | 1337.5647 | 669.2860        | 1320.5381      | 660.7727         | 1319.5541      | 660.2807         | S    | 3207.4106 | 1604.2089       | 3190.3841      | 1595.6957        | 3189.4000      | 1595.2037        | 29 |
| 13 | 1497.5953 | 749.3013        | 1480.5688      | 740.7880         | 1479.5847      | 740.2960         | C    | 3120.3786 | 1560.6929       | 3103.3520      | 1552.1797        | 3102.3680      | 1551.6876        | 28 |
| 14 | 1625.6539 | 813.3306        | 1608.6273      | 804.8173         | 1607.6433      | 804.3253         | Q    | 2960.3479 | 1480.6776       | 2943.3214      | 1472.1643        | 2942.3374      | 1471.6723        | 27 |
| 15 | 1754.6965 | 877.8519        | 1737.6699      | 869.3386         | 1736.6859      | 868.8466         | E    | 2832.2894 | 1416.6483       | 2815.2628      | 1408.1350        | 2814.2788      | 1407.6430        | 26 |
| 16 | 1855.7442 | 928.3757        | 1838.7176      | 919.8624         | 1837.7336      | 919.3704         | T    | 2703.2468 | 1352.1270       | 2686.2202      | 1343.6137        | 2685.2362      | 1343.1217        | 25 |
| 17 | 1926.7813 | 963.8943        | 1909.7547      | 955.3810         | 1908.7707      | 954.8890         | A    | 2602.1991 | 1301.6032       | 2585.1725      | 1293.0899        | 2584.1885      | 1292.5979        | 24 |
| 18 | 2025.8497 | 1013.4285       | 2008.8231      | 1004.9152        | 2007.8391      | 1004.4232        | V    | 2531.1620 | 1266.0846       | 2514.1354      | 1257.5713        | 2513.1514      | 1257.0793        | 23 |

|    |           |           |           |           |           |           |   |           |           |           |           |           |           |    |
|----|-----------|-----------|-----------|-----------|-----------|-----------|---|-----------|-----------|-----------|-----------|-----------|-----------|----|
| 19 | 2126.8974 | 1063.9523 | 2109.8708 | 1055.4390 | 2108.8868 | 1054.9470 | T | 2432.0936 | 1216.5504 | 2415.0670 | 1208.0371 | 2414.0830 | 1207.5451 | 22 |
| 20 | 2254.9559 | 1127.9816 | 2237.9294 | 1119.4683 | 2236.9454 | 1118.9763 | Q | 2331.0459 | 1166.0266 | 2314.0193 | 1157.5133 | 2313.0353 | 1157.0213 | 21 |
| 21 | 2356.0036 | 1178.5054 | 2338.9771 | 1169.9922 | 2337.9931 | 1169.5002 | T | 2202.9873 | 1101.9973 | 2185.9607 | 1093.4840 | 2184.9767 | 1092.9920 | 20 |
| 22 | 2519.0669 | 1260.0371 | 2502.0404 | 1251.5238 | 2501.0564 | 1251.0318 | Y | 2101.9396 | 1051.4734 | 2084.9131 | 1042.9602 | 2083.9291 | 1042.4682 | 19 |
| 23 | 2576.0884 | 1288.5478 | 2559.0619 | 1280.0346 | 2558.0778 | 1279.5426 | G | 1938.8763 | 969.9418  | 1921.8497 | 961.4285  | 1920.8657 | 960.9365  | 18 |
| 24 | 2633.1099 | 1317.0586 | 2616.0833 | 1308.5453 | 2615.0993 | 1308.0533 | G | 1881.8548 | 941.4310  | 1864.8283 | 932.9178  | 1863.8443 | 932.4258  | 17 |
| 25 | 2747.1528 | 1374.0800 | 2730.1263 | 1365.5668 | 2729.1422 | 1365.0748 | N | 1824.8334 | 912.9203  | 1807.8068 | 904.4070  | 1806.8228 | 903.9150  | 16 |
| 26 | 2834.1848 | 1417.5961 | 2817.1583 | 1409.0828 | 2816.1743 | 1408.5908 | S | 1710.7904 | 855.8989  | 1693.7639 | 847.3856  | 1692.7799 | 846.8936  | 15 |
| 27 | 2948.2278 | 1474.6175 | 2931.2012 | 1466.1042 | 2930.2172 | 1465.6122 | N | 1623.7584 | 812.3828  | 1606.7319 | 803.8696  | 1605.7478 | 803.3776  | 14 |
| 28 | 3005.2492 | 1503.1282 | 2988.2227 | 1494.6150 | 2987.2387 | 1494.1230 | G | 1509.7155 | 755.3614  | 1492.6889 | 746.8481  | 1491.7049 | 746.3561  | 13 |
| 29 | 3134.2918 | 1567.6495 | 3117.2653 | 1559.1363 | 3116.2813 | 1558.6443 | E | 1452.6940 | 726.8506  | 1435.6675 | 718.3374  | 1434.6834 | 717.8454  | 12 |
| 30 | 3231.3446 | 1616.1759 | 3214.3180 | 1607.6627 | 3213.3340 | 1607.1706 | P | 1323.6514 | 662.3293  | 1306.6249 | 653.8161  | 1305.6409 | 653.3241  | 11 |
| 31 | 3391.3752 | 1696.1913 | 3374.3487 | 1687.6780 | 3373.3647 | 1687.1860 | C | 1226.5987 | 613.8030  | 1209.5721 | 605.2897  | 1208.5881 | 604.7977  | 10 |
| 32 | 3490.4436 | 1745.7255 | 3473.4171 | 1737.2122 | 3472.4331 | 1736.7202 | V | 1066.5680 | 533.7876  | 1049.5415 | 525.2744  | 1048.5574 | 524.7824  | 9  |
| 33 | 3603.5277 | 1802.2675 | 3586.5012 | 1793.7542 | 3585.5171 | 1793.2622 | L | 967.4996  | 484.2534  | 950.4730  | 475.7402  | 949.4890  | 475.2482  | 8  |
| 34 | 3700.5805 | 1850.7939 | 3683.5539 | 1842.2806 | 3682.5699 | 1841.7886 | P | 854.4155  | 427.7114  | 837.3890  | 419.1981  | 836.4050  | 418.7061  | 7  |
| 35 | 3847.6489 | 1924.3281 | 3830.6223 | 1915.8148 | 3829.6383 | 1915.3228 | F | 757.3628  | 379.1850  | 740.3362  | 370.6717  | 739.3522  | 370.1797  | 6  |
| 36 | 3948.6966 | 1974.8519 | 3931.6700 | 1966.3386 | 3930.6860 | 1965.8466 | T | 610.2944  | 305.6508  | 593.2678  | 297.1375  | 592.2838  | 296.6455  | 5  |
| 37 | 4111.7599 | 2056.3836 | 4094.7333 | 2047.8703 | 4093.7493 | 2047.3783 | Y | 509.2467  | 255.1270  | 492.2201  | 246.6137  |           |           | 4  |
| 38 | 4225.8028 | 2113.4050 | 4208.7763 | 2104.8918 | 4207.7923 | 2104.3998 | N | 346.1833  | 173.5953  | 329.1568  | 165.0820  |           |           | 3  |
| 39 | 4282.8243 | 2141.9158 | 4265.7977 | 2133.4025 | 4264.8137 | 2132.9105 | G | 232.1404  | 116.5738  | 215.1139  | 108.0606  |           |           | 2  |
| 40 |           |           |           |           |           |           | R | 175.1190  | 88.0631   | 158.0924  | 79.5498   |           |           | 1  |

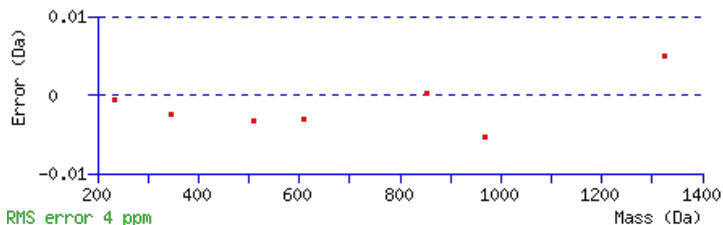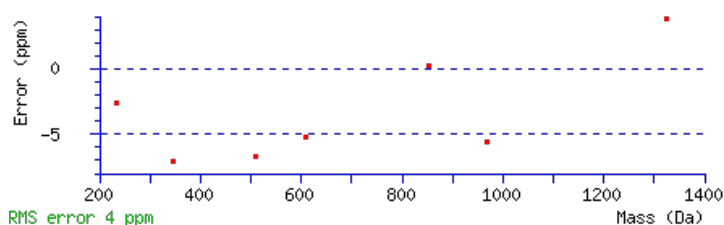

NCBI BLAST search of [QMLCTCLGNGVSCQETA VTQTYGGNSNGEPCVLPFTYNGR](#)

(Parameters: blastp, nr protein database, expect=20000, no filter, PAM30)

Other BLAST [web gateways](#)

All matches to this query

| Score | Mr(calcd) | Delta  | Sequence                                                  |
|-------|-----------|--------|-----------------------------------------------------------|
| 32.0  | 4455.9287 | 1.0244 | <a href="#">QMLCTCLGNGVSCQETA VTQTYGGNSNGEPCVLPFTYNGR</a> |

Mascot: <http://www.matrixscience.com/>

# Mascot Search Results

## Peptide View

MS/MS Fragmentation of **QMLCTCLGNGVSCQETAVTQTYGGNSNGEPCVLPFTYNGR**

Found in **P02751** in **uni\_human\_nr**, FINC\_HUMAN Fibronectin OS=Homo sapiens GN=FN1 PE=1 SV=4

Match to Query 18657: 4456.954776 from(1115.245970,4+) intensity(609333.8125) rtinseconds(3063) scans(18388) index(14031)

Title: 130809\_HPL\_Human\_Plaque\_BR1\_TR3\_08\_Spectrum035641\_scans\_\_18388\_RTINSECONDS=3063

Data file E:\\RAW\\HumanPlaques\\mgf\\T\\1D\\T130809\_HPL\_Human\_Plaque\_BR1\_TR3\_08.mgf

Click mouse within plot area to zoom in by factor of two about that point

Or,  to  Da  
 Label all possible matches  Label matches used for scoring   
 Show Y-axis

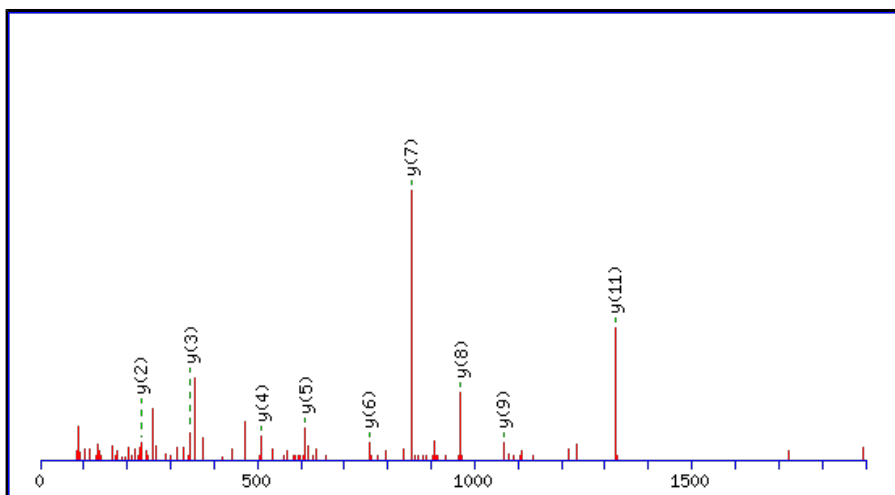

Monoisotopic mass of neutral peptide **Mr(calc):** 4455.9287

**Fixed modifications:** Carbamidomethyl (C) (apply to specified residues or termini only)

**Variable modifications:**

M2 : Oxidation (M), with neutral losses 0.0000(shown in table), 63.9983

**Ions Score:** 32 **Expect:** 0.015

**Matches :** 9/680 fragment ions using 28 most intense peaks ([help](#))

| #  | b         | b <sup>++</sup> | b <sup>*</sup> | b <sup>*++</sup> | b <sup>0</sup> | b <sup>0++</sup> | Seq. | y         | y <sup>++</sup> | y <sup>*</sup> | y <sup>*++</sup> | y <sup>0</sup> | y <sup>0++</sup> | #  |
|----|-----------|-----------------|----------------|------------------|----------------|------------------|------|-----------|-----------------|----------------|------------------|----------------|------------------|----|
| 1  | 129.0659  | 65.0366         | 112.0393       | 56.5233          |                |                  | Q    |           |                 |                |                  |                |                  | 40 |
| 2  | 276.1013  | 138.5543        | 259.0747       | 130.0410         |                |                  | M    | 4328.8774 | 2164.9423       | 4311.8508      | 2156.4291        | 4310.8668      | 2155.9370        | 39 |
| 3  | 389.1853  | 195.0963        | 372.1588       | 186.5830         |                |                  | L    | 4181.8420 | 2091.4246       | 4164.8154      | 2082.9114        | 4163.8314      | 2082.4193        | 38 |
| 4  | 549.2160  | 275.1116        | 532.1894       | 266.5983         |                |                  | C    | 4068.7579 | 2034.8826       | 4051.7314      | 2026.3693        | 4050.7474      | 2025.8773        | 37 |
| 5  | 650.2636  | 325.6355        | 633.2371       | 317.1222         | 632.2531       | 316.6302         | T    | 3908.7273 | 1954.8673       | 3891.7007      | 1946.3540        | 3890.7167      | 1945.8620        | 36 |
| 6  | 810.2943  | 405.6508        | 793.2677       | 397.1375         | 792.2837       | 396.6455         | C    | 3807.6796 | 1904.3434       | 3790.6530      | 1895.8302        | 3789.6690      | 1895.3381        | 35 |
| 7  | 923.3784  | 462.1928        | 906.3518       | 453.6795         | 905.3678       | 453.1875         | L    | 3647.6489 | 1824.3281       | 3630.6224      | 1815.8148        | 3629.6384      | 1815.3228        | 34 |
| 8  | 980.3998  | 490.7035        | 963.3733       | 482.1903         | 962.3893       | 481.6983         | G    | 3534.5649 | 1767.7861       | 3517.5383      | 1759.2728        | 3516.5543      | 1758.7808        | 33 |
| 9  | 1094.4428 | 547.7250        | 1077.4162      | 539.2117         | 1076.4322      | 538.7197         | N    | 3477.5434 | 1739.2753       | 3460.5169      | 1730.7621        | 3459.5328      | 1730.2701        | 32 |
| 10 | 1151.4642 | 576.2357        | 1134.4377      | 567.7225         | 1133.4536      | 567.2305         | G    | 3363.5005 | 1682.2539       | 3346.4739      | 1673.7406        | 3345.4899      | 1673.2486        | 31 |
| 11 | 1250.5326 | 625.7700        | 1233.5061      | 617.2567         | 1232.5221      | 616.7647         | V    | 3306.4790 | 1653.7431       | 3289.4525      | 1645.2299        | 3288.4685      | 1644.7379        | 30 |
| 12 | 1337.5647 | 669.2860        | 1320.5381      | 660.7727         | 1319.5541      | 660.2807         | S    | 3207.4106 | 1604.2089       | 3190.3841      | 1595.6957        | 3189.4000      | 1595.2037        | 29 |
| 13 | 1497.5953 | 749.3013        | 1480.5688      | 740.7880         | 1479.5847      | 740.2960         | C    | 3120.3786 | 1560.6929       | 3103.3520      | 1552.1797        | 3102.3680      | 1551.6876        | 28 |
| 14 | 1625.6539 | 813.3306        | 1608.6273      | 804.8173         | 1607.6433      | 804.3253         | Q    | 2960.3479 | 1480.6776       | 2943.3214      | 1472.1643        | 2942.3374      | 1471.6723        | 27 |
| 15 | 1754.6965 | 877.8519        | 1737.6699      | 869.3386         | 1736.6859      | 868.8466         | E    | 2832.2894 | 1416.6483       | 2815.2628      | 1408.1350        | 2814.2788      | 1407.6430        | 26 |
| 16 | 1855.7442 | 928.3757        | 1838.7176      | 919.8624         | 1837.7336      | 919.3704         | T    | 2703.2468 | 1352.1270       | 2686.2202      | 1343.6137        | 2685.2362      | 1343.1217        | 25 |
| 17 | 1926.7813 | 963.8943        | 1909.7547      | 955.3810         | 1908.7707      | 954.8890         | A    | 2602.1991 | 1301.6032       | 2585.1725      | 1293.0899        | 2584.1885      | 1292.5979        | 24 |
| 18 | 2025.8497 | 1013.4285       | 2008.8231      | 1004.9152        | 2007.8391      | 1004.4232        | V    | 2531.1620 | 1266.0846       | 2514.1354      | 1257.5713        | 2513.1514      | 1257.0793        | 23 |



|    |           |           |           |           |           |           |   |           |           |           |           |           |           |    |
|----|-----------|-----------|-----------|-----------|-----------|-----------|---|-----------|-----------|-----------|-----------|-----------|-----------|----|
| 19 | 2126.8974 | 1063.9523 | 2109.8708 | 1055.4390 | 2108.8868 | 1054.9470 | T | 2432.0936 | 1216.5504 | 2415.0670 | 1208.0371 | 2414.0830 | 1207.5451 | 22 |
| 20 | 2254.9559 | 1127.9816 | 2237.9294 | 1119.4683 | 2236.9454 | 1118.9763 | Q | 2331.0459 | 1166.0266 | 2314.0193 | 1157.5133 | 2313.0353 | 1157.0213 | 21 |
| 21 | 2356.0036 | 1178.5054 | 2338.9771 | 1169.9922 | 2337.9931 | 1169.5002 | T | 2202.9873 | 1101.9973 | 2185.9607 | 1093.4840 | 2184.9767 | 1092.9920 | 20 |
| 22 | 2519.0669 | 1260.0371 | 2502.0404 | 1251.5238 | 2501.0564 | 1251.0318 | Y | 2101.9396 | 1051.4734 | 2084.9131 | 1042.9602 | 2083.9291 | 1042.4682 | 19 |
| 23 | 2576.0884 | 1288.5478 | 2559.0619 | 1280.0346 | 2558.0778 | 1279.5426 | G | 1938.8763 | 969.9418  | 1921.8497 | 961.4285  | 1920.8657 | 960.9365  | 18 |
| 24 | 2633.1099 | 1317.0586 | 2616.0833 | 1308.5453 | 2615.0993 | 1308.0533 | G | 1881.8548 | 941.4310  | 1864.8283 | 932.9178  | 1863.8443 | 932.4258  | 17 |
| 25 | 2747.1528 | 1374.0800 | 2730.1263 | 1365.5668 | 2729.1422 | 1365.0748 | N | 1824.8334 | 912.9203  | 1807.8068 | 904.4070  | 1806.8228 | 903.9150  | 16 |
| 26 | 2834.1848 | 1417.5961 | 2817.1583 | 1409.0828 | 2816.1743 | 1408.5908 | S | 1710.7904 | 855.8989  | 1693.7639 | 847.3856  | 1692.7799 | 846.8936  | 15 |
| 27 | 2948.2278 | 1474.6175 | 2931.2012 | 1466.1042 | 2930.2172 | 1465.6122 | N | 1623.7584 | 812.3828  | 1606.7319 | 803.8696  | 1605.7478 | 803.3776  | 14 |
| 28 | 3005.2492 | 1503.1282 | 2988.2227 | 1494.6150 | 2987.2387 | 1494.1230 | G | 1509.7155 | 755.3614  | 1492.6889 | 746.8481  | 1491.7049 | 746.3561  | 13 |
| 29 | 3134.2918 | 1567.6495 | 3117.2653 | 1559.1363 | 3116.2813 | 1558.6443 | E | 1452.6940 | 726.8506  | 1435.6675 | 718.3374  | 1434.6834 | 717.8454  | 12 |
| 30 | 3231.3446 | 1616.1759 | 3214.3180 | 1607.6627 | 3213.3340 | 1607.1706 | P | 1323.6514 | 662.3293  | 1306.6249 | 653.8161  | 1305.6409 | 653.3241  | 11 |
| 31 | 3391.3752 | 1696.1913 | 3374.3487 | 1687.6780 | 3373.3647 | 1687.1860 | C | 1226.5987 | 613.8030  | 1209.5721 | 605.2897  | 1208.5881 | 604.7977  | 10 |
| 32 | 3490.4436 | 1745.7255 | 3473.4171 | 1737.2122 | 3472.4331 | 1736.7202 | V | 1066.5680 | 533.7876  | 1049.5415 | 525.2744  | 1048.5574 | 524.7824  | 9  |
| 33 | 3603.5277 | 1802.2675 | 3586.5012 | 1793.7542 | 3585.5171 | 1793.2622 | L | 967.4996  | 484.2534  | 950.4730  | 475.7402  | 949.4890  | 475.2482  | 8  |
| 34 | 3700.5805 | 1850.7939 | 3683.5539 | 1842.2806 | 3682.5699 | 1841.7886 | P | 854.4155  | 427.7114  | 837.3890  | 419.1981  | 836.4050  | 418.7061  | 7  |
| 35 | 3847.6489 | 1924.3281 | 3830.6223 | 1915.8148 | 3829.6383 | 1915.3228 | F | 757.3628  | 379.1850  | 740.3362  | 370.6717  | 739.3522  | 370.1797  | 6  |
| 36 | 3948.6966 | 1974.8519 | 3931.6700 | 1966.3386 | 3930.6860 | 1965.8466 | T | 610.2944  | 305.6508  | 593.2678  | 297.1375  | 592.2838  | 296.6455  | 5  |
| 37 | 4111.7599 | 2056.3836 | 4094.7333 | 2047.8703 | 4093.7493 | 2047.3783 | Y | 509.2467  | 255.1270  | 492.2201  | 246.6137  |           |           | 4  |
| 38 | 4225.8028 | 2113.4050 | 4208.7763 | 2104.8918 | 4207.7923 | 2104.3998 | N | 346.1833  | 173.5953  | 329.1568  | 165.0820  |           |           | 3  |
| 39 | 4282.8243 | 2141.9158 | 4265.7977 | 2133.4025 | 4264.8137 | 2132.9105 | G | 232.1404  | 116.5738  | 215.1139  | 108.0606  |           |           | 2  |
| 40 |           |           |           |           |           |           | R | 175.1190  | 88.0631   | 158.0924  | 79.5498   |           |           | 1  |

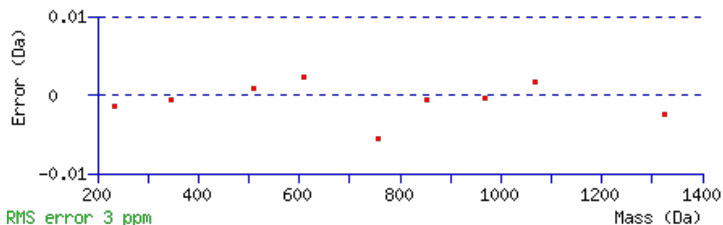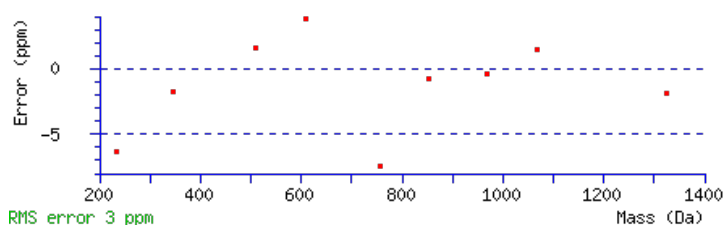

NCBI BLAST search of [QMLCTCLGNGVSCQETA V T Q T Y G G N S N G E P C V L P F T Y N G R](#)

(Parameters: blastp, nr protein database, expect=20000, no filter, PAM30)

Other BLAST [web gateways](#)

All matches to this query

| Score | Mr(calcd) | Delta  | Sequence                                                                        |
|-------|-----------|--------|---------------------------------------------------------------------------------|
| 31.9  | 4455.9287 | 1.0260 | <a href="#">QMLCTCLGNGVSCQETA V T Q T Y G G N S N G E P C V L P F T Y N G R</a> |

Mascot: <http://www.matrixscience.com/>

# Mascot Search Results

## Peptide View

MS/MS Fragmentation of **QMLCTCLGNGVSCQETAVTQTYGGNSNGEPCVLPFTYNGR**

Found in **P02751** in **uni\_human\_nr**, FINC\_HUMAN Fibronectin OS=Homo sapiens GN=FN1 PE=1 SV=4

Match to Query 17805: 4440.911292 from(1481.311040,3+) intensity(210279.1406) rtinseconds(3097) scans(18317) index(13958)

Title: 130806\_HPL\_Human\_Plaque\_BR1\_TR2\_11\_Spectrum034994\_scans\_\_18317\_RTINSECONDS=3097

Data file E:\\RAW\\HumanPlaques\\mgf\\T\\1D\\T130806\_HPL\_Human\_Plaque\_BR1\_TR2\_11.mgf

Click mouse within plot area to zoom in by factor of two about that point

Or,  to  Da  
 Label all possible matches  Label matches used for scoring   
 Show Y-axis

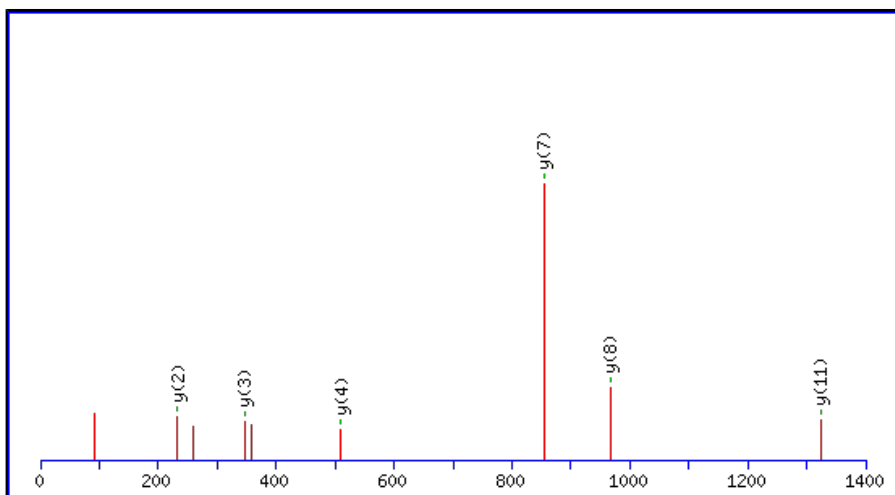

Monoisotopic mass of neutral peptide **Mr(calc):** 4440.9178

**Fixed modifications:** Carbamidomethyl (C) (apply to specified residues or termini only)

**Variable modifications:**

N27 : Deamidated (NQ)

**Ions Score:** 42 **Expect:** 0.001

**Matches :** 6/452 fragment ions using 7 most intense peaks ([help](#))

| #  | b         | b <sup>++</sup> | b*        | b <sup>***</sup> | b <sup>0</sup> | b <sup>0++</sup> | Seq. | y         | y <sup>++</sup> | y*        | y <sup>***</sup> | y <sup>0</sup> | y <sup>0++</sup> | #  |
|----|-----------|-----------------|-----------|------------------|----------------|------------------|------|-----------|-----------------|-----------|------------------|----------------|------------------|----|
| 1  | 129.0659  | 65.0366         | 112.0393  | 56.5233          |                |                  | Q    |           |                 |           |                  |                |                  | 40 |
| 2  | 260.1063  | 130.5568        | 243.0798  | 122.0435         |                |                  | M    | 4313.8665 | 2157.4369       | 4296.8399 | 2148.9236        | 4295.8559      | 2148.4316        | 39 |
| 3  | 373.1904  | 187.0988        | 356.1639  | 178.5856         |                |                  | L    | 4182.8260 | 2091.9166       | 4165.7994 | 2083.4034        | 4164.8154      | 2082.9114        | 38 |
| 4  | 533.2211  | 267.1142        | 516.1945  | 258.6009         |                |                  | C    | 4069.7419 | 2035.3746       | 4052.7154 | 2026.8613        | 4051.7314      | 2026.3693        | 37 |
| 5  | 634.2687  | 317.6380        | 617.2422  | 309.1247         | 616.2582       | 308.6327         | T    | 3909.7113 | 1955.3593       | 3892.6847 | 1946.8460        | 3891.7007      | 1946.3540        | 36 |
| 6  | 794.2994  | 397.6533        | 777.2728  | 389.1401         | 776.2888       | 388.6480         | C    | 3808.6636 | 1904.8354       | 3791.6371 | 1896.3222        | 3790.6530      | 1895.8302        | 35 |
| 7  | 907.3834  | 454.1954        | 890.3569  | 445.6821         | 889.3729       | 445.1901         | L    | 3648.6330 | 1824.8201       | 3631.6064 | 1816.3068        | 3630.6224      | 1815.8148        | 34 |
| 8  | 964.4049  | 482.7061        | 947.3784  | 474.1928         | 946.3943       | 473.7008         | G    | 3535.5489 | 1768.2781       | 3518.5223 | 1759.7648        | 3517.5383      | 1759.2728        | 33 |
| 9  | 1078.4478 | 539.7276        | 1061.4213 | 531.2143         | 1060.4373      | 530.7223         | N    | 3478.5274 | 1739.7674       | 3461.5009 | 1731.2541        | 3460.5169      | 1730.7621        | 32 |
| 10 | 1135.4693 | 568.2383        | 1118.4428 | 559.7250         | 1117.4587      | 559.2330         | G    | 3364.4845 | 1682.7459       | 3347.4580 | 1674.2326        | 3346.4739      | 1673.7406        | 31 |
| 11 | 1234.5377 | 617.7725        | 1217.5112 | 609.2592         | 1216.5271      | 608.7672         | V    | 3307.4630 | 1654.2352       | 3290.4365 | 1645.7219        | 3289.4525      | 1645.2299        | 30 |
| 12 | 1321.5697 | 661.2885        | 1304.5432 | 652.7752         | 1303.5592      | 652.2832         | S    | 3208.3946 | 1604.7009       | 3191.3681 | 1596.1877        | 3190.3841      | 1595.6957        | 29 |
| 13 | 1481.6004 | 741.3038        | 1464.5738 | 732.7906         | 1463.5898      | 732.2986         | C    | 3121.3626 | 1561.1849       | 3104.3360 | 1552.6717        | 3103.3520      | 1552.1797        | 28 |
| 14 | 1609.6590 | 805.3331        | 1592.6324 | 796.8198         | 1591.6484      | 796.3278         | Q    | 2961.3319 | 1481.1696       | 2944.3054 | 1472.6563        | 2943.3214      | 1472.1643        | 27 |
| 15 | 1738.7016 | 869.8544        | 1721.6750 | 861.3411         | 1720.6910      | 860.8491         | E    | 2833.2734 | 1417.1403       | 2816.2468 | 1408.6270        | 2815.2628      | 1408.1350        | 26 |
| 16 | 1839.7492 | 920.3783        | 1822.7227 | 911.8650         | 1821.7387      | 911.3730         | T    | 2704.2308 | 1352.6190       | 2687.2042 | 1344.1058        | 2686.2202      | 1343.6137        | 25 |
| 17 | 1910.7864 | 955.8968        | 1893.7598 | 947.3835         | 1892.7758      | 946.8915         | A    | 2603.1831 | 1302.0952       | 2586.1565 | 1293.5819        | 2585.1725      | 1293.0899        | 24 |
| 18 | 2009.8548 | 1005.4310       | 1992.8282 | 996.9177         | 1991.8442      | 996.4257         | V    | 2532.1460 | 1266.5766       | 2515.1194 | 1258.0634        | 2514.1354      | 1257.5713        | 23 |

|    |           |           |           |           |           |           |   |           |           |           |           |           |           |    |
|----|-----------|-----------|-----------|-----------|-----------|-----------|---|-----------|-----------|-----------|-----------|-----------|-----------|----|
| 19 | 2110.9024 | 1055.9549 | 2093.8759 | 1047.4416 | 2092.8919 | 1046.9496 | T | 2433.0776 | 1217.0424 | 2416.0510 | 1208.5291 | 2415.0670 | 1208.0371 | 22 |
| 20 | 2238.9610 | 1119.9842 | 2221.9345 | 1111.4709 | 2220.9505 | 1110.9789 | Q | 2332.0299 | 1166.5186 | 2315.0033 | 1158.0053 | 2314.0193 | 1157.5133 | 21 |
| 21 | 2340.0087 | 1170.5080 | 2322.9822 | 1161.9947 | 2321.9981 | 1161.5027 | T | 2203.9713 | 1102.4893 | 2186.9448 | 1093.9760 | 2185.9607 | 1093.4840 | 20 |
| 22 | 2503.0720 | 1252.0397 | 2486.0455 | 1243.5264 | 2485.0615 | 1243.0344 | Y | 2102.9236 | 1051.9655 | 2085.8971 | 1043.4522 | 2084.9131 | 1042.9602 | 19 |
| 23 | 2560.0935 | 1280.5504 | 2543.0669 | 1272.0371 | 2542.0829 | 1271.5451 | G | 1939.8603 | 970.4338  | 1922.8338 | 961.9205  | 1921.8497 | 961.4285  | 18 |
| 24 | 2617.1150 | 1309.0611 | 2600.0884 | 1300.5478 | 2599.1044 | 1300.0558 | G | 1882.8388 | 941.9231  | 1865.8123 | 933.4098  | 1864.8283 | 932.9178  | 17 |
| 25 | 2731.1579 | 1366.0826 | 2714.1313 | 1357.5693 | 2713.1473 | 1357.0773 | N | 1825.8174 | 913.4123  | 1808.7908 | 904.8991  | 1807.8068 | 904.4070  | 16 |
| 26 | 2818.1899 | 1409.5986 | 2801.1634 | 1401.0853 | 2800.1794 | 1400.5933 | S | 1711.7744 | 856.3909  | 1694.7479 | 847.8776  | 1693.7639 | 847.3856  | 15 |
| 27 | 2933.2169 | 1467.1121 | 2916.1903 | 1458.5988 | 2915.2063 | 1458.1068 | N | 1624.7424 | 812.8748  | 1607.7159 | 804.3616  | 1606.7319 | 803.8696  | 14 |
| 28 | 2990.2383 | 1495.6228 | 2973.2118 | 1487.1095 | 2972.2278 | 1486.6175 | G | 1509.7155 | 755.3614  | 1492.6889 | 746.8481  | 1491.7049 | 746.3561  | 13 |
| 29 | 3119.2809 | 1560.1441 | 3102.2544 | 1551.6308 | 3101.2704 | 1551.1388 | E | 1452.6940 | 726.8506  | 1435.6675 | 718.3374  | 1434.6834 | 717.8454  | 12 |
| 30 | 3216.3337 | 1608.6705 | 3199.3071 | 1600.1572 | 3198.3231 | 1599.6652 | P | 1323.6514 | 662.3293  | 1306.6249 | 653.8161  | 1305.6409 | 653.3241  | 11 |
| 31 | 3376.3643 | 1688.6858 | 3359.3378 | 1680.1725 | 3358.3538 | 1679.6805 | C | 1226.5987 | 613.8030  | 1209.5721 | 605.2897  | 1208.5881 | 604.7977  | 10 |
| 32 | 3475.4327 | 1738.2200 | 3458.4062 | 1729.7067 | 3457.4222 | 1729.2147 | V | 1066.5680 | 533.7876  | 1049.5415 | 525.2744  | 1048.5574 | 524.7824  | 9  |
| 33 | 3588.5168 | 1794.7620 | 3571.4903 | 1786.2488 | 3570.5062 | 1785.7568 | L | 967.4996  | 484.2534  | 950.4730  | 475.7402  | 949.4890  | 475.2482  | 8  |
| 34 | 3685.5696 | 1843.2884 | 3668.5430 | 1834.7751 | 3667.5590 | 1834.2831 | P | 854.4155  | 427.7114  | 837.3890  | 419.1981  | 836.4050  | 418.7061  | 7  |
| 35 | 3832.6380 | 1916.8226 | 3815.6114 | 1908.3094 | 3814.6274 | 1907.8173 | F | 757.3628  | 379.1850  | 740.3362  | 370.6717  | 739.3522  | 370.1797  | 6  |
| 36 | 3933.6857 | 1967.3465 | 3916.6591 | 1958.8332 | 3915.6751 | 1958.3412 | T | 610.2944  | 305.6508  | 593.2678  | 297.1375  | 592.2838  | 296.6455  | 5  |
| 37 | 4096.7490 | 2048.8781 | 4079.7224 | 2040.3649 | 4078.7384 | 2039.8729 | Y | 509.2467  | 255.1270  | 492.2201  | 246.6137  |           |           | 4  |
| 38 | 4210.7919 | 2105.8996 | 4193.7654 | 2097.3863 | 4192.7814 | 2096.8943 | N | 346.1833  | 173.5953  | 329.1568  | 165.0820  |           |           | 3  |
| 39 | 4267.8134 | 2134.4103 | 4250.7868 | 2125.8971 | 4249.8028 | 2125.4050 | G | 232.1404  | 116.5738  | 215.1139  | 108.0606  |           |           | 2  |
| 40 |           |           |           |           |           |           | R | 175.1190  | 88.0631   | 158.0924  | 79.5498   |           |           | 1  |

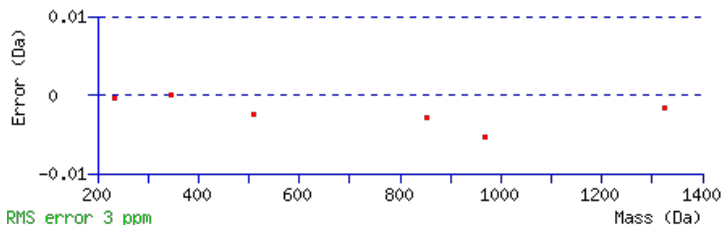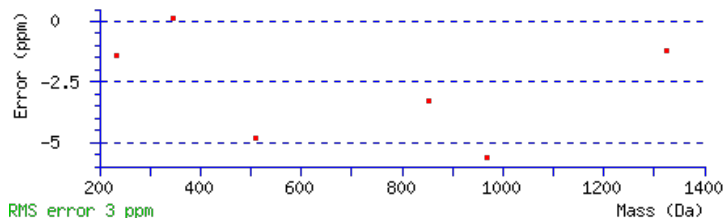

NCBI BLAST search of [QMLCTCLGNGVSCQETAVTQTYGGNSNGEPCVLPFTYNGR](#)

(Parameters: blastp, nr protein database, expect=20000, no filter, PAM30)

Other BLAST [web gateways](#)

All matches to this query

| Score | Mr(calcd) | Delta   | Sequence                                                 | Site Analysis         |
|-------|-----------|---------|----------------------------------------------------------|-----------------------|
| 42.4  | 4440.9178 | -0.0065 | <a href="#">QMLCTCLGNGVSCQETAVTQTYGGNSNGEPCVLPFTYNGR</a> | Deamidated N27 14.72% |
| 42.4  | 4440.9178 | -0.0065 | <a href="#">QMLCTCLGNGVSCQETAVTQTYGGNSNGEPCVLPFTYNGR</a> | Deamidated N25 14.72% |
| 42.4  | 4440.9178 | -0.0065 | <a href="#">QMLCTCLGNGVSCQETAVTQTYGGNSNGEPCVLPFTYNGR</a> | Deamidated Q20 14.72% |
| 42.4  | 4440.9178 | -0.0065 | <a href="#">QMLCTCLGNGVSCQETAVTQTYGGNSNGEPCVLPFTYNGR</a> | Deamidated Q14 14.72% |
| 42.4  | 4440.9178 | -0.0065 | <a href="#">QMLCTCLGNGVSCQETAVTQTYGGNSNGEPCVLPFTYNGR</a> | Deamidated N9 14.72%  |
| 42.4  | 4440.9178 | -0.0065 | <a href="#">QMLCTCLGNGVSCQETAVTQTYGGNSNGEPCVLPFTYNGR</a> | Deamidated Q1 14.72%  |

Mascot: <http://www.matrixscience.com/>

# Mascot Search Results

## Peptide View

MS/MS Fragmentation of **QMLCTCLGNGVSCQETAVTQTYGGNSNGEPCVLPFTYNGR**

Found in **P02751** in **uni\_human\_nr**, FINC\_HUMAN Fibronectin OS=Homo sapiens GN=FN1 PE=1 SV=4

Match to Query 17377: 4440.925182 from(1481.315670,3+) intensity(225400.6563) rtinseconds(3107) scans(17964) index(13644)

Title: 130801\_HPL\_Human\_Plaque\_BR2\_TR1\_12\_Spectrum034122\_scans\_\_17964\_RTINSECONDS=3107

Data file E:\\RAW\\HumanPlaques\\mgf\\T\\1D\\T130801\_HPL\_Human\_Plaque\_BR2\_TR1\_12.mgf

Click mouse within plot area to zoom in by factor of two about that point

Or,  to  Da

Label all possible matches  Label matches used for scoring

Show Y-axis

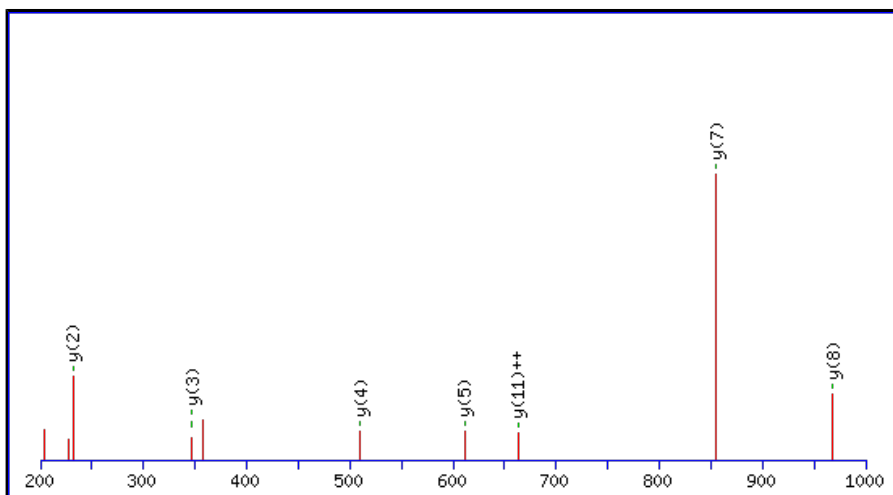

Monoisotopic mass of neutral peptide **Mr(calc): 4440.9178**

Fixed modifications: Carbamidomethyl (C) (apply to specified residues or termini only)

Variable modifications:

N38 : Deamidated (NQ)

Ions Score: 39 Expect: 0.0028

Matches : 7/452 fragment ions using 9 most intense peaks ([help](#))

| #  | b         | b <sup>++</sup> | b <sup>*</sup> | b <sup>*++</sup> | b <sup>0</sup> | b <sup>0++</sup> | Seq. | y         | y <sup>++</sup> | y <sup>*</sup> | y <sup>*++</sup> | y <sup>0</sup> | y <sup>0++</sup> | #  |
|----|-----------|-----------------|----------------|------------------|----------------|------------------|------|-----------|-----------------|----------------|------------------|----------------|------------------|----|
| 1  | 129.0659  | 65.0366         | 112.0393       | 56.5233          |                |                  | Q    |           |                 |                |                  |                |                  | 40 |
| 2  | 260.1063  | 130.5568        | 243.0798       | 122.0435         |                |                  | M    | 4313.8665 | 2157.4369       | 4296.8399      | 2148.9236        | 4295.8559      | 2148.4316        | 39 |
| 3  | 373.1904  | 187.0988        | 356.1639       | 178.5856         |                |                  | L    | 4182.8260 | 2091.9166       | 4165.7994      | 2083.4034        | 4164.8154      | 2082.9114        | 38 |
| 4  | 533.2211  | 267.1142        | 516.1945       | 258.6009         |                |                  | C    | 4069.7419 | 2035.3746       | 4052.7154      | 2026.8613        | 4051.7314      | 2026.3693        | 37 |
| 5  | 634.2687  | 317.6380        | 617.2422       | 309.1247         | 616.2582       | 308.6327         | T    | 3909.7113 | 1955.3593       | 3892.6847      | 1946.8460        | 3891.7007      | 1946.3540        | 36 |
| 6  | 794.2994  | 397.6533        | 777.2728       | 389.1401         | 776.2888       | 388.6480         | C    | 3808.6636 | 1904.8354       | 3791.6371      | 1896.3222        | 3790.6530      | 1895.8302        | 35 |
| 7  | 907.3834  | 454.1954        | 890.3569       | 445.6821         | 889.3729       | 445.1901         | L    | 3648.6330 | 1824.8201       | 3631.6064      | 1816.3068        | 3630.6224      | 1815.8148        | 34 |
| 8  | 964.4049  | 482.7061        | 947.3784       | 474.1928         | 946.3943       | 473.7008         | G    | 3535.5489 | 1768.2781       | 3518.5223      | 1759.7648        | 3517.5383      | 1759.2728        | 33 |
| 9  | 1078.4478 | 539.7276        | 1061.4213      | 531.2143         | 1060.4373      | 530.7223         | N    | 3478.5274 | 1739.7674       | 3461.5009      | 1731.2541        | 3460.5169      | 1730.7621        | 32 |
| 10 | 1135.4693 | 568.2383        | 1118.4428      | 559.7250         | 1117.4587      | 559.2330         | G    | 3364.4845 | 1682.7459       | 3347.4580      | 1674.2326        | 3346.4739      | 1673.7406        | 31 |
| 11 | 1234.5377 | 617.7725        | 1217.5112      | 609.2592         | 1216.5271      | 608.7672         | V    | 3307.4630 | 1654.2352       | 3290.4365      | 1645.7219        | 3289.4525      | 1645.2299        | 30 |
| 12 | 1321.5697 | 661.2885        | 1304.5432      | 652.7752         | 1303.5592      | 652.2832         | S    | 3208.3946 | 1604.7009       | 3191.3681      | 1596.1877        | 3190.3841      | 1595.6957        | 29 |
| 13 | 1481.6004 | 741.3038        | 1464.5738      | 732.7906         | 1463.5898      | 732.2986         | C    | 3121.3626 | 1561.1849       | 3104.3360      | 1552.6717        | 3103.3520      | 1552.1797        | 28 |
| 14 | 1609.6590 | 805.3331        | 1592.6324      | 796.8198         | 1591.6484      | 796.3278         | Q    | 2961.3319 | 1481.1696       | 2944.3054      | 1472.6563        | 2943.3214      | 1472.1643        | 27 |
| 15 | 1738.7016 | 869.8544        | 1721.6750      | 861.3411         | 1720.6910      | 860.8491         | E    | 2833.2734 | 1417.1403       | 2816.2468      | 1408.6270        | 2815.2628      | 1408.1350        | 26 |
| 16 | 1839.7492 | 920.3783        | 1822.7227      | 911.8650         | 1821.7387      | 911.3730         | T    | 2704.2308 | 1352.6190       | 2687.2042      | 1344.1058        | 2686.2202      | 1343.6137        | 25 |
| 17 | 1910.7864 | 955.8968        | 1893.7598      | 947.3835         | 1892.7758      | 946.8915         | A    | 2603.1831 | 1302.0952       | 2586.1565      | 1293.5819        | 2585.1725      | 1293.0899        | 24 |
| 18 | 2009.8548 | 1005.4310       | 1992.8282      | 996.9177         | 1991.8442      | 996.4257         | V    | 2532.1460 | 1266.5766       | 2515.1194      | 1258.0634        | 2514.1354      | 1257.5713        | 23 |

|    |           |           |           |           |           |           |   |           |           |           |           |           |           |    |
|----|-----------|-----------|-----------|-----------|-----------|-----------|---|-----------|-----------|-----------|-----------|-----------|-----------|----|
| 19 | 2110.9024 | 1055.9549 | 2093.8759 | 1047.4416 | 2092.8919 | 1046.9496 | T | 2433.0776 | 1217.0424 | 2416.0510 | 1208.5291 | 2415.0670 | 1208.0371 | 22 |
| 20 | 2238.9610 | 1119.9842 | 2221.9345 | 1111.4709 | 2220.9505 | 1110.9789 | Q | 2332.0299 | 1166.5186 | 2315.0033 | 1158.0053 | 2314.0193 | 1157.5133 | 21 |
| 21 | 2340.0087 | 1170.5080 | 2322.9822 | 1161.9947 | 2321.9981 | 1161.5027 | T | 2203.9713 | 1102.4893 | 2186.9448 | 1093.9760 | 2185.9607 | 1093.4840 | 20 |
| 22 | 2503.0720 | 1252.0397 | 2486.0455 | 1243.5264 | 2485.0615 | 1243.0344 | Y | 2102.9236 | 1051.9655 | 2085.8971 | 1043.4522 | 2084.9131 | 1042.9602 | 19 |
| 23 | 2560.0935 | 1280.5504 | 2543.0669 | 1272.0371 | 2542.0829 | 1271.5451 | G | 1939.8603 | 970.4338  | 1922.8338 | 961.9205  | 1921.8497 | 961.4285  | 18 |
| 24 | 2617.1150 | 1309.0611 | 2600.0884 | 1300.5478 | 2599.1044 | 1300.0558 | G | 1882.8388 | 941.9231  | 1865.8123 | 933.4098  | 1864.8283 | 932.9178  | 17 |
| 25 | 2731.1579 | 1366.0826 | 2714.1313 | 1357.5693 | 2713.1473 | 1357.0773 | N | 1825.8174 | 913.4123  | 1808.7908 | 904.8991  | 1807.8068 | 904.4070  | 16 |
| 26 | 2818.1899 | 1409.5986 | 2801.1634 | 1401.0853 | 2800.1794 | 1400.5933 | S | 1711.7744 | 856.3909  | 1694.7479 | 847.8776  | 1693.7639 | 847.3856  | 15 |
| 27 | 2932.2328 | 1466.6201 | 2915.2063 | 1458.1068 | 2914.2223 | 1457.6148 | N | 1624.7424 | 812.8748  | 1607.7159 | 804.3616  | 1606.7319 | 803.8696  | 14 |
| 28 | 2989.2543 | 1495.1308 | 2972.2278 | 1486.6175 | 2971.2437 | 1486.1255 | G | 1510.6995 | 755.8534  | 1493.6729 | 747.3401  | 1492.6889 | 746.8481  | 13 |
| 29 | 3118.2969 | 1559.6521 | 3101.2704 | 1551.1388 | 3100.2863 | 1550.6468 | E | 1453.6780 | 727.3427  | 1436.6515 | 718.8294  | 1435.6675 | 718.3374  | 12 |
| 30 | 3215.3497 | 1608.1785 | 3198.3231 | 1599.6652 | 3197.3391 | 1599.1732 | P | 1324.6354 | 662.8214  | 1307.6089 | 654.3081  | 1306.6249 | 653.8161  | 11 |
| 31 | 3375.3803 | 1688.1938 | 3358.3538 | 1679.6805 | 3357.3697 | 1679.1885 | C | 1227.5827 | 614.2950  | 1210.5561 | 605.7817  | 1209.5721 | 605.2897  | 10 |
| 32 | 3474.4487 | 1737.7280 | 3457.4222 | 1729.2147 | 3456.4382 | 1728.7227 | V | 1067.5520 | 534.2796  | 1050.5255 | 525.7664  | 1049.5415 | 525.2744  | 9  |
| 33 | 3587.5328 | 1794.2700 | 3570.5062 | 1785.7568 | 3569.5222 | 1785.2648 | L | 968.4836  | 484.7454  | 951.4571  | 476.2322  | 950.4730  | 475.7402  | 8  |
| 34 | 3684.5856 | 1842.7964 | 3667.5590 | 1834.2831 | 3666.5750 | 1833.7911 | P | 855.3995  | 428.2034  | 838.3730  | 419.6901  | 837.3890  | 419.1981  | 7  |
| 35 | 3831.6540 | 1916.3306 | 3814.6274 | 1907.8173 | 3813.6434 | 1907.3253 | F | 758.3468  | 379.6770  | 741.3202  | 371.1638  | 740.3362  | 370.6717  | 6  |
| 36 | 3932.7016 | 1966.8545 | 3915.6751 | 1958.3412 | 3914.6911 | 1957.8492 | T | 611.2784  | 306.1428  | 594.2518  | 297.6295  | 593.2678  | 297.1375  | 5  |
| 37 | 4095.7650 | 2048.3861 | 4078.7384 | 2039.8729 | 4077.7544 | 2039.3808 | Y | 510.2307  | 255.6190  | 493.2041  | 247.1057  |           |           | 4  |
| 38 | 4210.7919 | 2105.8996 | 4193.7654 | 2097.3863 | 4192.7814 | 2096.8943 | N | 347.1674  | 174.0873  | 330.1408  | 165.5740  |           |           | 3  |
| 39 | 4267.8134 | 2134.4103 | 4250.7868 | 2125.8971 | 4249.8028 | 2125.4050 | G | 232.1404  | 116.5738  | 215.1139  | 108.0606  |           |           | 2  |
| 40 |           |           |           |           |           |           | R | 175.1190  | 88.0631   | 158.0924  | 79.5498   |           |           | 1  |

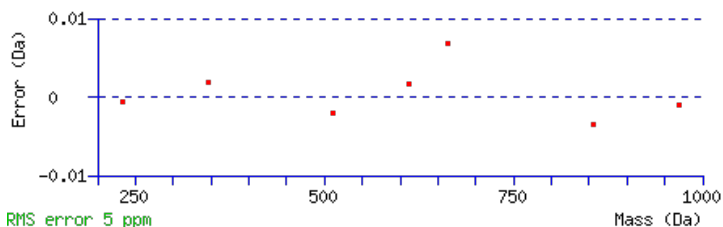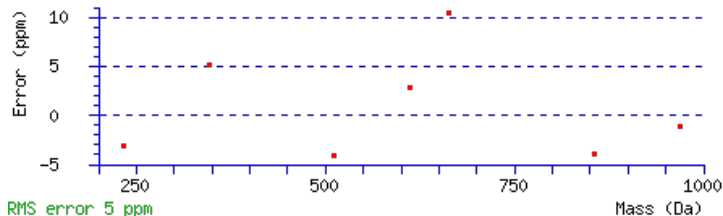

NCBI BLAST search of [QMLCTCLGNGVSCQETA VTQT YGGNSNGEPCVLPFTYNGR](#)

(Parameters: blastp, nr protein database, expect=20000, no filter, PAM30)

Other BLAST [web gateways](#)

All matches to this query

| Score | Mr(calcd) | Delta  | Sequence                                                   |
|-------|-----------|--------|------------------------------------------------------------|
| 38.9  | 4440.9178 | 0.0074 | <a href="#">QMLCTCLGNGVSCQETA VTQT YGGNSNGEPCVLPFTYNGR</a> |
| 5.0   | 4438.9173 | 2.0079 | <a href="#">NQEAFKHL YFEK FPGYYDTMDAGYMDEEGYLYVMSR</a>     |
| 5.0   | 4438.9173 | 2.0079 | <a href="#">NQEAFKHL YFEK FPGYYDTMDAGYMDEEGYLYVMSR</a>     |
| 5.0   | 4438.9173 | 2.0079 | <a href="#">NQEAFKHL YFEK FPGYYDTMDAGYMDEEGYLYVMSR</a>     |

Mascot: <http://www.matrixscience.com/>

# Mascot Search Results

## Peptide View

MS/MS Fragmentation of **QMLCTCLGNGVSCQETAVTQTYGGNSNGEPCVLPFTYNGR**

Found in **P02751** in **uni\_human\_nr**, FINC\_HUMAN Fibronectin OS=Homo sapiens GN=FN1 PE=1 SV=4

Match to Query 16874: 4440.904976 from(1111.233520,4+) intensity(196461.0781) rtinseconds(3129) scans(17786) index(13260)

Title: 130801\_HPL\_Human\_Plaque\_BR2\_TR1\_15\_Spectrum033022\_scans\_\_17786\_RTINSECONDS=3129

Data file E:\\RAW\\HumanPlaques\\imgf\\T\\1D\\T130801\_HPL\_Human\_Plaque\_BR2\_TR1\_15.mgf

Click mouse within plot area to zoom in by factor of two about that point

Or,  to  Da

Label all possible matches  Label matches used for scoring

Show Y-axis

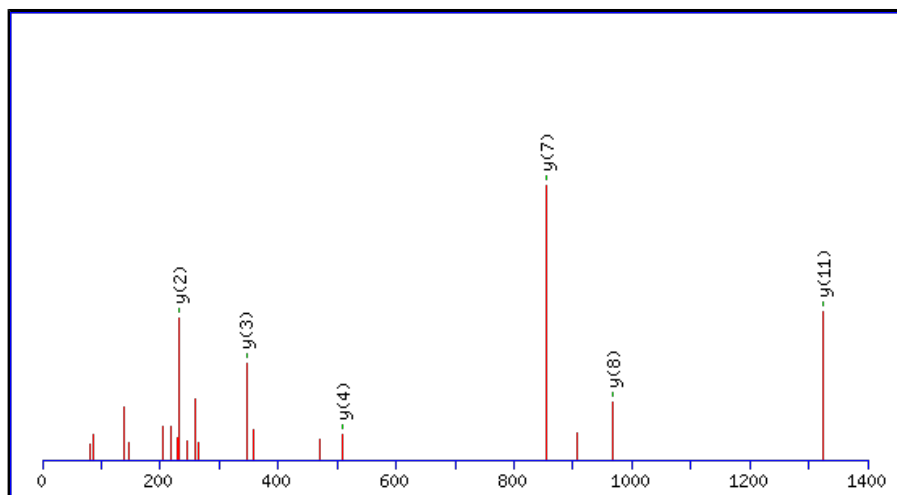

Monoisotopic mass of neutral peptide **Mr(calc): 4440.9178**

Fixed modifications: Carbamidomethyl (C) (apply to specified residues or termini only)

Variable modifications:

N38 : Deamidated (NQ)

Ions Score: 37 Expect: 0.0033

Matches : 6/452 fragment ions using 8 most intense peaks ([help](#))

| #  | b         | b <sup>++</sup> | b <sup>*</sup> | b <sup>*++</sup> | b <sup>0</sup> | b <sup>0++</sup> | Seq. | y         | y <sup>++</sup> | y <sup>*</sup> | y <sup>*++</sup> | y <sup>0</sup> | y <sup>0++</sup> | #  |
|----|-----------|-----------------|----------------|------------------|----------------|------------------|------|-----------|-----------------|----------------|------------------|----------------|------------------|----|
| 1  | 129.0659  | 65.0366         | 112.0393       | 56.5233          |                |                  | Q    |           |                 |                |                  |                |                  | 40 |
| 2  | 260.1063  | 130.5568        | 243.0798       | 122.0435         |                |                  | M    | 4313.8665 | 2157.4369       | 4296.8399      | 2148.9236        | 4295.8559      | 2148.4316        | 39 |
| 3  | 373.1904  | 187.0988        | 356.1639       | 178.5856         |                |                  | L    | 4182.8260 | 2091.9166       | 4165.7994      | 2083.4034        | 4164.8154      | 2082.9114        | 38 |
| 4  | 533.2211  | 267.1142        | 516.1945       | 258.6009         |                |                  | C    | 4069.7419 | 2035.3746       | 4052.7154      | 2026.8613        | 4051.7314      | 2026.3693        | 37 |
| 5  | 634.2687  | 317.6380        | 617.2422       | 309.1247         | 616.2582       | 308.6327         | T    | 3909.7113 | 1955.3593       | 3892.6847      | 1946.8460        | 3891.7007      | 1946.3540        | 36 |
| 6  | 794.2994  | 397.6533        | 777.2728       | 389.1401         | 776.2888       | 388.6480         | C    | 3808.6636 | 1904.8354       | 3791.6371      | 1896.3222        | 3790.6530      | 1895.8302        | 35 |
| 7  | 907.3834  | 454.1954        | 890.3569       | 445.6821         | 889.3729       | 445.1901         | L    | 3648.6330 | 1824.8201       | 3631.6064      | 1816.3068        | 3630.6224      | 1815.8148        | 34 |
| 8  | 964.4049  | 482.7061        | 947.3784       | 474.1928         | 946.3943       | 473.7008         | G    | 3535.5489 | 1768.2781       | 3518.5223      | 1759.7648        | 3517.5383      | 1759.2728        | 33 |
| 9  | 1078.4478 | 539.7276        | 1061.4213      | 531.2143         | 1060.4373      | 530.7223         | N    | 3478.5274 | 1739.7674       | 3461.5009      | 1731.2541        | 3460.5169      | 1730.7621        | 32 |
| 10 | 1135.4693 | 568.2383        | 1118.4428      | 559.7250         | 1117.4587      | 559.2330         | G    | 3364.4845 | 1682.7459       | 3347.4580      | 1674.2326        | 3346.4739      | 1673.7406        | 31 |
| 11 | 1234.5377 | 617.7725        | 1217.5112      | 609.2592         | 1216.5271      | 608.7672         | V    | 3307.4630 | 1654.2352       | 3290.4365      | 1645.7219        | 3289.4525      | 1645.2299        | 30 |
| 12 | 1321.5697 | 661.2885        | 1304.5432      | 652.7752         | 1303.5592      | 652.2832         | S    | 3208.3946 | 1604.7009       | 3191.3681      | 1596.1877        | 3190.3841      | 1595.6957        | 29 |
| 13 | 1481.6004 | 741.3038        | 1464.5738      | 732.7906         | 1463.5898      | 732.2986         | C    | 3121.3626 | 1561.1849       | 3104.3360      | 1552.6717        | 3103.3520      | 1552.1797        | 28 |
| 14 | 1609.6590 | 805.3331        | 1592.6324      | 796.8198         | 1591.6484      | 796.3278         | Q    | 2961.3319 | 1481.1696       | 2944.3054      | 1472.6563        | 2943.3214      | 1472.1643        | 27 |
| 15 | 1738.7016 | 869.8544        | 1721.6750      | 861.3411         | 1720.6910      | 860.8491         | E    | 2833.2734 | 1417.1403       | 2816.2468      | 1408.6270        | 2815.2628      | 1408.1350        | 26 |
| 16 | 1839.7492 | 920.3783        | 1822.7227      | 911.8650         | 1821.7387      | 911.3730         | T    | 2704.2308 | 1352.6190       | 2687.2042      | 1344.1058        | 2686.2202      | 1343.6137        | 25 |
| 17 | 1910.7864 | 955.8968        | 1893.7598      | 947.3835         | 1892.7758      | 946.8915         | A    | 2603.1831 | 1302.0952       | 2586.1565      | 1293.5819        | 2585.1725      | 1293.0899        | 24 |
| 18 | 2009.8548 | 1005.4310       | 1992.8282      | 996.9177         | 1991.8442      | 996.4257         | V    | 2532.1460 | 1266.5766       | 2515.1194      | 1258.0634        | 2514.1354      | 1257.5713        | 23 |

|    |           |           |           |           |           |           |   |           |           |           |           |           |           |    |
|----|-----------|-----------|-----------|-----------|-----------|-----------|---|-----------|-----------|-----------|-----------|-----------|-----------|----|
| 19 | 2110.9024 | 1055.9549 | 2093.8759 | 1047.4416 | 2092.8919 | 1046.9496 | T | 2433.0776 | 1217.0424 | 2416.0510 | 1208.5291 | 2415.0670 | 1208.0371 | 22 |
| 20 | 2238.9610 | 1119.9842 | 2221.9345 | 1111.4709 | 2220.9505 | 1110.9789 | Q | 2332.0299 | 1166.5186 | 2315.0033 | 1158.0053 | 2314.0193 | 1157.5133 | 21 |
| 21 | 2340.0087 | 1170.5080 | 2322.9822 | 1161.9947 | 2321.9981 | 1161.5027 | T | 2203.9713 | 1102.4893 | 2186.9448 | 1093.9760 | 2185.9607 | 1093.4840 | 20 |
| 22 | 2503.0720 | 1252.0397 | 2486.0455 | 1243.5264 | 2485.0615 | 1243.0344 | Y | 2102.9236 | 1051.9655 | 2085.8971 | 1043.4522 | 2084.9131 | 1042.9602 | 19 |
| 23 | 2560.0935 | 1280.5504 | 2543.0669 | 1272.0371 | 2542.0829 | 1271.5451 | G | 1939.8603 | 970.4338  | 1922.8338 | 961.9205  | 1921.8497 | 961.4285  | 18 |
| 24 | 2617.1150 | 1309.0611 | 2600.0884 | 1300.5478 | 2599.1044 | 1300.0558 | G | 1882.8388 | 941.9231  | 1865.8123 | 933.4098  | 1864.8283 | 932.9178  | 17 |
| 25 | 2731.1579 | 1366.0826 | 2714.1313 | 1357.5693 | 2713.1473 | 1357.0773 | N | 1825.8174 | 913.4123  | 1808.7908 | 904.8991  | 1807.8068 | 904.4070  | 16 |
| 26 | 2818.1899 | 1409.5986 | 2801.1634 | 1401.0853 | 2800.1794 | 1400.5933 | S | 1711.7744 | 856.3909  | 1694.7479 | 847.8776  | 1693.7639 | 847.3856  | 15 |
| 27 | 2932.2328 | 1466.6201 | 2915.2063 | 1458.1068 | 2914.2223 | 1457.6148 | N | 1624.7424 | 812.8748  | 1607.7159 | 804.3616  | 1606.7319 | 803.8696  | 14 |
| 28 | 2989.2543 | 1495.1308 | 2972.2278 | 1486.6175 | 2971.2437 | 1486.1255 | G | 1510.6995 | 755.8534  | 1493.6729 | 747.3401  | 1492.6889 | 746.8481  | 13 |
| 29 | 3118.2969 | 1559.6521 | 3101.2704 | 1551.1388 | 3100.2863 | 1550.6468 | E | 1453.6780 | 727.3427  | 1436.6515 | 718.8294  | 1435.6675 | 718.3374  | 12 |
| 30 | 3215.3497 | 1608.1785 | 3198.3231 | 1599.6652 | 3197.3391 | 1599.1732 | P | 1324.6354 | 662.8214  | 1307.6089 | 654.3081  | 1306.6249 | 653.8161  | 11 |
| 31 | 3375.3803 | 1688.1938 | 3358.3538 | 1679.6805 | 3357.3697 | 1679.1885 | C | 1227.5827 | 614.2950  | 1210.5561 | 605.7817  | 1209.5721 | 605.2897  | 10 |
| 32 | 3474.4487 | 1737.7280 | 3457.4222 | 1729.2147 | 3456.4382 | 1728.7227 | V | 1067.5520 | 534.2796  | 1050.5255 | 525.7664  | 1049.5415 | 525.2744  | 9  |
| 33 | 3587.5328 | 1794.2700 | 3570.5062 | 1785.7568 | 3569.5222 | 1785.2648 | L | 968.4836  | 484.7454  | 951.4571  | 476.2322  | 950.4730  | 475.7402  | 8  |
| 34 | 3684.5856 | 1842.7964 | 3667.5590 | 1834.2831 | 3666.5750 | 1833.7911 | P | 855.3995  | 428.2034  | 838.3730  | 419.6901  | 837.3890  | 419.1981  | 7  |
| 35 | 3831.6540 | 1916.3306 | 3814.6274 | 1907.8173 | 3813.6434 | 1907.3253 | F | 758.3468  | 379.6770  | 741.3202  | 371.1638  | 740.3362  | 370.6717  | 6  |
| 36 | 3932.7016 | 1966.8545 | 3915.6751 | 1958.3412 | 3914.6911 | 1957.8492 | T | 611.2784  | 306.1428  | 594.2518  | 297.6295  | 593.2678  | 297.1375  | 5  |
| 37 | 4095.7650 | 2048.3861 | 4078.7384 | 2039.8729 | 4077.7544 | 2039.3808 | Y | 510.2307  | 255.6190  | 493.2041  | 247.1057  |           |           | 4  |
| 38 | 4210.7919 | 2105.8996 | 4193.7654 | 2097.3863 | 4192.7814 | 2096.8943 | N | 347.1674  | 174.0873  | 330.1408  | 165.5740  |           |           | 3  |
| 39 | 4267.8134 | 2134.4103 | 4250.7868 | 2125.8971 | 4249.8028 | 2125.4050 | G | 232.1404  | 116.5738  | 215.1139  | 108.0606  |           |           | 2  |
| 40 |           |           |           |           |           |           | R | 175.1190  | 88.0631   | 158.0924  | 79.5498   |           |           | 1  |

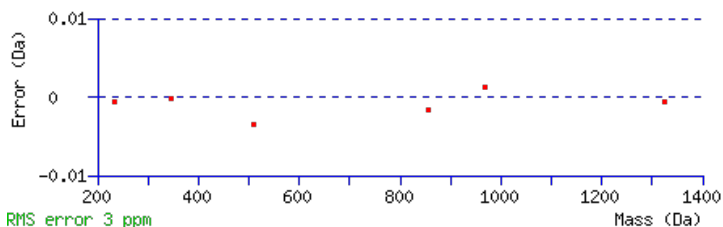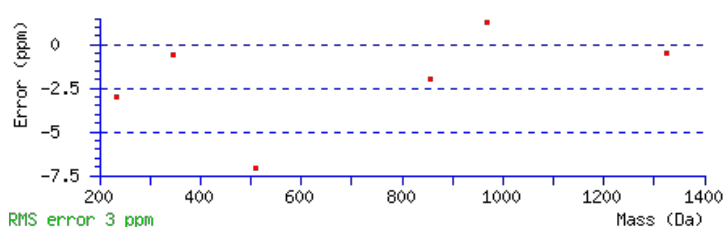

NCBI BLAST search of [QMLCTCLGNGVSCQETA V T Q T Y G G N S N G E P C V L P F T Y N G R](#)

(Parameters: blastp, nr protein database, expect=20000, no filter, PAM30)

Other BLAST [web gateways](#)

All matches to this query

| Score | Mr(calcd) | Delta   | Sequence                                                                        |
|-------|-----------|---------|---------------------------------------------------------------------------------|
| 37.2  | 4440.9178 | -0.0128 | <a href="#">QMLCTCLGNGVSCQETA V T Q T Y G G N S N G E P C V L P F T Y N G R</a> |
| 0.8   | 4438.9173 | 1.9877  | <a href="#">NQEAFKHL Y FEK F P G Y Y D T M D A G Y M D E E G Y L Y V M S R</a>  |
| 0.8   | 4438.9173 | 1.9877  | <a href="#">NQEAFKHL Y FEK F P G Y Y D T M D A G Y M D E E G Y L Y V M S R</a>  |
| 0.8   | 4438.9173 | 1.9877  | <a href="#">NQEAFKHL Y FEK F P G Y Y D T M D A G Y M D E E G Y L Y V M S R</a>  |

Mascot: <http://www.matrixscience.com/>

# Mascot Search Results

## Peptide View

MS/MS Fragmentation of **QMLCTCLGNGVSCQETAVTQTYGGNSNGEPCVLPFTYNGR**

Found in **P02751** in **uni\_human\_nr**, FINC\_HUMAN Fibronectin OS=Homo sapiens GN=FN1 PE=1 SV=4

Match to Query 19418: 4442.938656 from(1111.741940,4+) intensity(314869.7813) rtinseconds(3504) scans(21638) index(16965)

Title: 130806\_HPL\_Human\_Plaque\_BR1\_TR2\_07\_Spectrum038936\_scans\_21638\_RTINSECONDS=3504

Data file E:\\RAW\\HumanPlaques\\imgf\\T\\1D\\T130806\_HPL\_Human\_Plaque\_BR1\_TR2\_07.mgf

Click mouse within plot area to zoom in by factor of two about that point

Or,  to  Da  
 Label all possible matches  Label matches used for scoring   
 Show Y-axis

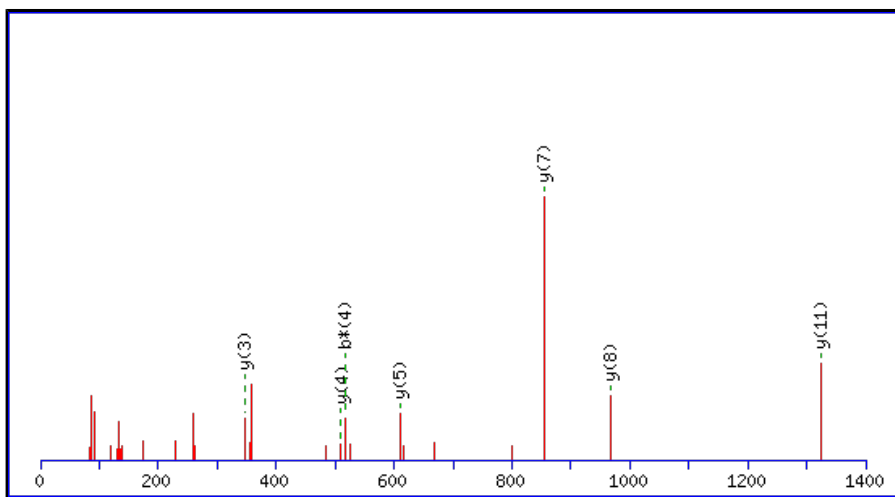

Monoisotopic mass of neutral peptide Mr(calc): 4440.9178

Fixed modifications: Carbamidomethyl (C) (apply to specified residues or termini only)

Variable modifications:

N27 : Deamidated (NQ)

Ions Score: 26 Expect: 0.054

Matches : 7/452 fragment ions using 15 most intense peaks ([help](#))

| #  | b         | b <sup>++</sup> | b <sup>*</sup> | b <sup>*++</sup> | b <sup>0</sup> | b <sup>0++</sup> | Seq. | y         | y <sup>++</sup> | y <sup>*</sup> | y <sup>*++</sup> | y <sup>0</sup> | y <sup>0++</sup> | #  |
|----|-----------|-----------------|----------------|------------------|----------------|------------------|------|-----------|-----------------|----------------|------------------|----------------|------------------|----|
| 1  | 129.0659  | 65.0366         | 112.0393       | 56.5233          |                |                  | Q    |           |                 |                |                  |                |                  | 40 |
| 2  | 260.1063  | 130.5568        | 243.0798       | 122.0435         |                |                  | M    | 4313.8665 | 2157.4369       | 4296.8399      | 2148.9236        | 4295.8559      | 2148.4316        | 39 |
| 3  | 373.1904  | 187.0988        | 356.1639       | 178.5856         |                |                  | L    | 4182.8260 | 2091.9166       | 4165.7994      | 2083.4034        | 4164.8154      | 2082.9114        | 38 |
| 4  | 533.2211  | 267.1142        | 516.1945       | 258.6009         |                |                  | C    | 4069.7419 | 2035.3746       | 4052.7154      | 2026.8613        | 4051.7314      | 2026.3693        | 37 |
| 5  | 634.2687  | 317.6380        | 617.2422       | 309.1247         | 616.2582       | 308.6327         | T    | 3909.7113 | 1955.3593       | 3892.6847      | 1946.8460        | 3891.7007      | 1946.3540        | 36 |
| 6  | 794.2994  | 397.6533        | 777.2728       | 389.1401         | 776.2888       | 388.6480         | C    | 3808.6636 | 1904.8354       | 3791.6371      | 1896.3222        | 3790.6530      | 1895.8302        | 35 |
| 7  | 907.3834  | 454.1954        | 890.3569       | 445.6821         | 889.3729       | 445.1901         | L    | 3648.6330 | 1824.8201       | 3631.6064      | 1816.3068        | 3630.6224      | 1815.8148        | 34 |
| 8  | 964.4049  | 482.7061        | 947.3784       | 474.1928         | 946.3943       | 473.7008         | G    | 3535.5489 | 1768.2781       | 3518.5223      | 1759.7648        | 3517.5383      | 1759.2728        | 33 |
| 9  | 1078.4478 | 539.7276        | 1061.4213      | 531.2143         | 1060.4373      | 530.7223         | N    | 3478.5274 | 1739.7674       | 3461.5009      | 1731.2541        | 3460.5169      | 1730.7621        | 32 |
| 10 | 1135.4693 | 568.2383        | 1118.4428      | 559.7250         | 1117.4587      | 559.2330         | G    | 3364.4845 | 1682.7459       | 3347.4580      | 1674.2326        | 3346.4739      | 1673.7406        | 31 |
| 11 | 1234.5377 | 617.7725        | 1217.5112      | 609.2592         | 1216.5271      | 608.7672         | V    | 3307.4630 | 1654.2352       | 3290.4365      | 1645.7219        | 3289.4525      | 1645.2299        | 30 |
| 12 | 1321.5697 | 661.2885        | 1304.5432      | 652.7752         | 1303.5592      | 652.2832         | S    | 3208.3946 | 1604.7009       | 3191.3681      | 1596.1877        | 3190.3841      | 1595.6957        | 29 |
| 13 | 1481.6004 | 741.3038        | 1464.5738      | 732.7906         | 1463.5898      | 732.2986         | C    | 3121.3626 | 1561.1849       | 3104.3360      | 1552.6717        | 3103.3520      | 1552.1797        | 28 |
| 14 | 1609.6590 | 805.3331        | 1592.6324      | 796.8198         | 1591.6484      | 796.3278         | Q    | 2961.3319 | 1481.1696       | 2944.3054      | 1472.6563        | 2943.3214      | 1472.1643        | 27 |
| 15 | 1738.7016 | 869.8544        | 1721.6750      | 861.3411         | 1720.6910      | 860.8491         | E    | 2833.2734 | 1417.1403       | 2816.2468      | 1408.6270        | 2815.2628      | 1408.1350        | 26 |
| 16 | 1839.7492 | 920.3783        | 1822.7227      | 911.8650         | 1821.7387      | 911.3730         | T    | 2704.2308 | 1352.6190       | 2687.2042      | 1344.1058        | 2686.2202      | 1343.6137        | 25 |
| 17 | 1910.7864 | 955.8968        | 1893.7598      | 947.3835         | 1892.7758      | 946.8915         | A    | 2603.1831 | 1302.0952       | 2586.1565      | 1293.5819        | 2585.1725      | 1293.0899        | 24 |
| 18 | 2009.8548 | 1005.4310       | 1992.8282      | 996.9177         | 1991.8442      | 996.4257         | V    | 2532.1460 | 1266.5766       | 2515.1194      | 1258.0634        | 2514.1354      | 1257.5713        | 23 |



|    |           |           |           |           |           |           |   |           |           |           |           |           |           |    |
|----|-----------|-----------|-----------|-----------|-----------|-----------|---|-----------|-----------|-----------|-----------|-----------|-----------|----|
| 19 | 2110.9024 | 1055.9549 | 2093.8759 | 1047.4416 | 2092.8919 | 1046.9496 | T | 2433.0776 | 1217.0424 | 2416.0510 | 1208.5291 | 2415.0670 | 1208.0371 | 22 |
| 20 | 2238.9610 | 1119.9842 | 2221.9345 | 1111.4709 | 2220.9505 | 1110.9789 | Q | 2332.0299 | 1166.5186 | 2315.0033 | 1158.0053 | 2314.0193 | 1157.5133 | 21 |
| 21 | 2340.0087 | 1170.5080 | 2322.9822 | 1161.9947 | 2321.9981 | 1161.5027 | T | 2203.9713 | 1102.4893 | 2186.9448 | 1093.9760 | 2185.9607 | 1093.4840 | 20 |
| 22 | 2503.0720 | 1252.0397 | 2486.0455 | 1243.5264 | 2485.0615 | 1243.0344 | Y | 2102.9236 | 1051.9655 | 2085.8971 | 1043.4522 | 2084.9131 | 1042.9602 | 19 |
| 23 | 2560.0935 | 1280.5504 | 2543.0669 | 1272.0371 | 2542.0829 | 1271.5451 | G | 1939.8603 | 970.4338  | 1922.8338 | 961.9205  | 1921.8497 | 961.4285  | 18 |
| 24 | 2617.1150 | 1309.0611 | 2600.0884 | 1300.5478 | 2599.1044 | 1300.0558 | G | 1882.8388 | 941.9231  | 1865.8123 | 933.4098  | 1864.8283 | 932.9178  | 17 |
| 25 | 2731.1579 | 1366.0826 | 2714.1313 | 1357.5693 | 2713.1473 | 1357.0773 | N | 1825.8174 | 913.4123  | 1808.7908 | 904.8991  | 1807.8068 | 904.4070  | 16 |
| 26 | 2818.1899 | 1409.5986 | 2801.1634 | 1401.0853 | 2800.1794 | 1400.5933 | S | 1711.7744 | 856.3909  | 1694.7479 | 847.8776  | 1693.7639 | 847.3856  | 15 |
| 27 | 2933.2169 | 1467.1121 | 2916.1903 | 1458.5988 | 2915.2063 | 1458.1068 | N | 1624.7424 | 812.8748  | 1607.7159 | 804.3616  | 1606.7319 | 803.8696  | 14 |
| 28 | 2990.2383 | 1495.6228 | 2973.2118 | 1487.1095 | 2972.2278 | 1486.6175 | G | 1509.7155 | 755.3614  | 1492.6889 | 746.8481  | 1491.7049 | 746.3561  | 13 |
| 29 | 3119.2809 | 1560.1441 | 3102.2544 | 1551.6308 | 3101.2704 | 1551.1388 | E | 1452.6940 | 726.8506  | 1435.6675 | 718.3374  | 1434.6834 | 717.8454  | 12 |
| 30 | 3216.3337 | 1608.6705 | 3199.3071 | 1600.1572 | 3198.3231 | 1599.6652 | P | 1323.6514 | 662.3293  | 1306.6249 | 653.8161  | 1305.6409 | 653.3241  | 11 |
| 31 | 3376.3643 | 1688.6858 | 3359.3378 | 1680.1725 | 3358.3538 | 1679.6805 | C | 1226.5987 | 613.8030  | 1209.5721 | 605.2897  | 1208.5881 | 604.7977  | 10 |
| 32 | 3475.4327 | 1738.2200 | 3458.4062 | 1729.7067 | 3457.4222 | 1729.2147 | V | 1066.5680 | 533.7876  | 1049.5415 | 525.2744  | 1048.5574 | 524.7824  | 9  |
| 33 | 3588.5168 | 1794.7620 | 3571.4903 | 1786.2488 | 3570.5062 | 1785.7568 | L | 967.4996  | 484.2534  | 950.4730  | 475.7402  | 949.4890  | 475.2482  | 8  |
| 34 | 3685.5696 | 1843.2884 | 3668.5430 | 1834.7751 | 3667.5590 | 1834.2831 | P | 854.4155  | 427.7114  | 837.3890  | 419.1981  | 836.4050  | 418.7061  | 7  |
| 35 | 3832.6380 | 1916.8226 | 3815.6114 | 1908.3094 | 3814.6274 | 1907.8173 | F | 757.3628  | 379.1850  | 740.3362  | 370.6717  | 739.3522  | 370.1797  | 6  |
| 36 | 3933.6857 | 1967.3465 | 3916.6591 | 1958.8332 | 3915.6751 | 1958.3412 | T | 610.2944  | 305.6508  | 593.2678  | 297.1375  | 592.2838  | 296.6455  | 5  |
| 37 | 4096.7490 | 2048.8781 | 4079.7224 | 2040.3649 | 4078.7384 | 2039.8729 | Y | 509.2467  | 255.1270  | 492.2201  | 246.6137  |           |           | 4  |
| 38 | 4210.7919 | 2105.8996 | 4193.7654 | 2097.3863 | 4192.7814 | 2096.8943 | N | 346.1833  | 173.5953  | 329.1568  | 165.0820  |           |           | 3  |
| 39 | 4267.8134 | 2134.4103 | 4250.7868 | 2125.8971 | 4249.8028 | 2125.4050 | G | 232.1404  | 116.5738  | 215.1139  | 108.0606  |           |           | 2  |
| 40 |           |           |           |           |           |           | R | 175.1190  | 88.0631   | 158.0924  | 79.5498   |           |           | 1  |

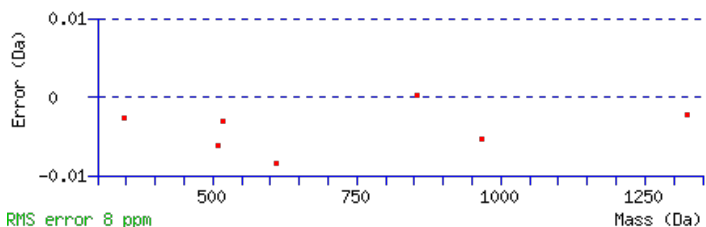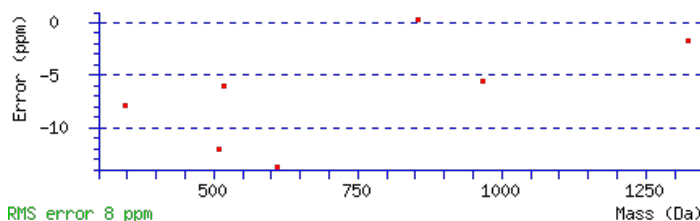

NCBI BLAST search of [QMLCTCLGNGVSCQETA VTQTYGGNSNGEPCVLPFTYNGR](#)

(Parameters: blastp, nr protein database, expect=20000, no filter, PAM30)

Other BLAST [web gateways](#)

All matches to this query

| Score | Mr(calcd) | Delta   | Sequence                                                  | Site Analysis         |
|-------|-----------|---------|-----------------------------------------------------------|-----------------------|
| 26.3  | 4440.9178 | 2.0208  | <a href="#">QMLCTCLGNGVSCQETA VTQTYGGNSNGEPCVLPFTYNGR</a> | Deamidated N27 16.84% |
| 26.3  | 4440.9178 | 2.0208  | <a href="#">QMLCTCLGNGVSCQETA VTQTYGGNSNGEPCVLPFTYNGR</a> | Deamidated N25 16.84% |
| 26.3  | 4440.9178 | 2.0208  | <a href="#">QMLCTCLGNGVSCQETA VTQTYGGNSNGEPCVLPFTYNGR</a> | Deamidated Q20 16.84% |
| 26.3  | 4440.9178 | 2.0208  | <a href="#">QMLCTCLGNGVSCQETA VTQTYGGNSNGEPCVLPFTYNGR</a> | Deamidated Q14 16.84% |
| 26.3  | 4440.9178 | 2.0208  | <a href="#">QMLCTCLGNGVSCQETA VTQTYGGNSNGEPCVLPFTYNGR</a> | Deamidated N9 16.84%  |
| 26.0  | 4440.9178 | 2.0208  | <a href="#">QMLCTCLGNGVSCQETA VTQTYGGNSNGEPCVLPFTYNGR</a> | Deamidated Q1 15.75%  |
| 0.9   | 4442.9547 | -0.0160 | <a href="#">DNSKNVFFSPMSMSCALAMVYMGAKGNTAAQMAQILSFNK</a>  |                       |
| 0.9   | 4442.9547 | -0.0160 | <a href="#">DNSKNVFFSPMSMSCALAMVYMGAKGNTAAQMAQILSFNK</a>  |                       |

Mascot: <http://www.matrixscience.com/>

# Mascot Search Results

## Peptide View

MS/MS Fragmentation of **QMLCTCLGNGVSCQETAVTQTYGGNSNGEPCVLPFTYNGR**

Found in **P02751** in **uni\_human\_nr**, FINC\_HUMAN Fibronectin OS=Homo sapiens GN=FN1 PE=1 SV=4

Match to Query 18685: 4439.938632 from(1480.986820,3+) intensity(2434001.5000) rtinseconds(3046) scans(18312) index(13995)

Title: 130806\_HPL\_Human\_Plaque\_BR1\_TR2\_08\_Spectrum035687\_scans\_\_18312\_RTINSECONDS=3046

Data file E:\\RAW\\HumanPlaques\\mgf\\T\\1D\\T130806\_HPL\_Human\_Plaque\_BR1\_TR2\_08.mgf

Click mouse within plot area to zoom in by factor of two about that point

Or,  to  Da

Label all possible matches  Label matches used for scoring

Show Y-axis

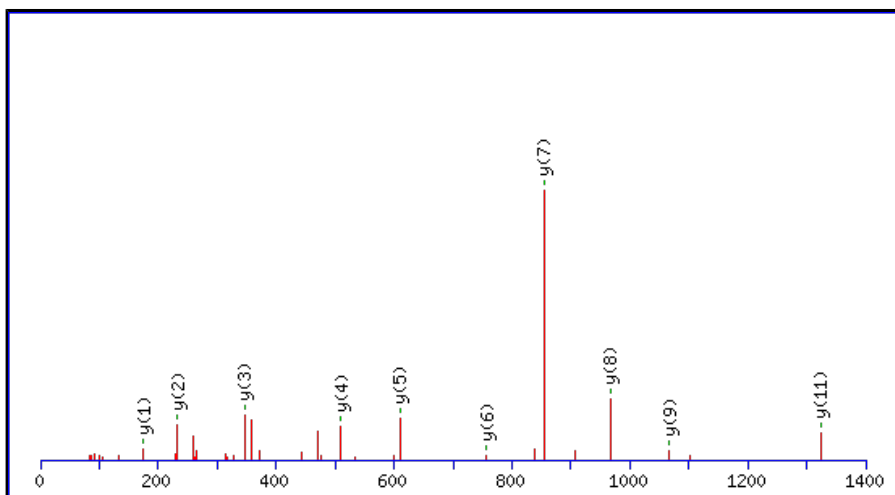

Monoisotopic mass of neutral peptide Mr(calc): 4439.9338

Fixed modifications: Carbamidomethyl (C) (apply to specified residues or termini only)

Ions Score: 75 Expect: 8.6e-007

Matches : 10/452 fragment ions using 12 most intense peaks ([help](#))

| #  | b         | b <sup>++</sup> | b*        | b <sup>*++</sup> | b <sup>0</sup> | b <sup>0++</sup> | Seq. | y         | y <sup>++</sup> | y*        | y <sup>*++</sup> | y <sup>0</sup> | y <sup>0++</sup> | #  |
|----|-----------|-----------------|-----------|------------------|----------------|------------------|------|-----------|-----------------|-----------|------------------|----------------|------------------|----|
| 1  | 129.0659  | 65.0366         | 112.0393  | 56.5233          |                |                  | Q    |           |                 |           |                  |                |                  | 40 |
| 2  | 260.1063  | 130.5568        | 243.0798  | 122.0435         |                |                  | M    | 4312.8825 | 2156.9449       | 4295.8559 | 2148.4316        | 4294.8719      | 2147.9396        | 39 |
| 3  | 373.1904  | 187.0988        | 356.1639  | 178.5856         |                |                  | L    | 4181.8420 | 2091.4246       | 4164.8154 | 2082.9114        | 4163.8314      | 2082.4193        | 38 |
| 4  | 533.2211  | 267.1142        | 516.1945  | 258.6009         |                |                  | C    | 4068.7579 | 2034.8826       | 4051.7314 | 2026.3693        | 4050.7474      | 2025.8773        | 37 |
| 5  | 634.2687  | 317.6380        | 617.2422  | 309.1247         | 616.2582       | 308.6327         | T    | 3908.7273 | 1954.8673       | 3891.7007 | 1946.3540        | 3890.7167      | 1945.8620        | 36 |
| 6  | 794.2994  | 397.6533        | 777.2728  | 389.1401         | 776.2888       | 388.6480         | C    | 3807.6796 | 1904.3434       | 3790.6530 | 1895.8302        | 3789.6690      | 1895.3381        | 35 |
| 7  | 907.3834  | 454.1954        | 890.3569  | 445.6821         | 889.3729       | 445.1901         | L    | 3647.6489 | 1824.3281       | 3630.6224 | 1815.8148        | 3629.6384      | 1815.3228        | 34 |
| 8  | 964.4049  | 482.7061        | 947.3784  | 474.1928         | 946.3943       | 473.7008         | G    | 3534.5649 | 1767.7861       | 3517.5383 | 1759.2728        | 3516.5543      | 1758.7808        | 33 |
| 9  | 1078.4478 | 539.7276        | 1061.4213 | 531.2143         | 1060.4373      | 530.7223         | N    | 3477.5434 | 1739.2753       | 3460.5169 | 1730.7621        | 3459.5328      | 1730.2701        | 32 |
| 10 | 1135.4693 | 568.2383        | 1118.4428 | 559.7250         | 1117.4587      | 559.2330         | G    | 3363.5005 | 1682.2539       | 3346.4739 | 1673.7406        | 3345.4899      | 1673.2486        | 31 |
| 11 | 1234.5377 | 617.7725        | 1217.5112 | 609.2592         | 1216.5271      | 608.7672         | V    | 3306.4790 | 1653.7431       | 3289.4525 | 1645.2299        | 3288.4685      | 1644.7379        | 30 |
| 12 | 1321.5697 | 661.2885        | 1304.5432 | 652.7752         | 1303.5592      | 652.2832         | S    | 3207.4106 | 1604.2089       | 3190.3841 | 1595.6957        | 3189.4000      | 1595.2037        | 29 |
| 13 | 1481.6004 | 741.3038        | 1464.5738 | 732.7906         | 1463.5898      | 732.2986         | C    | 3120.3786 | 1560.6929       | 3103.3520 | 1552.1797        | 3102.3680      | 1551.6876        | 28 |
| 14 | 1609.6590 | 805.3331        | 1592.6324 | 796.8198         | 1591.6484      | 796.3278         | Q    | 2960.3479 | 1480.6776       | 2943.3214 | 1472.1643        | 2942.3374      | 1471.6723        | 27 |
| 15 | 1738.7016 | 869.8544        | 1721.6750 | 861.3411         | 1720.6910      | 860.8491         | E    | 2832.2894 | 1416.6483       | 2815.2628 | 1408.1350        | 2814.2788      | 1407.6430        | 26 |
| 16 | 1839.7492 | 920.3783        | 1822.7227 | 911.8650         | 1821.7387      | 911.3730         | T    | 2703.2468 | 1352.1270       | 2686.2202 | 1343.6137        | 2685.2362      | 1343.1217        | 25 |
| 17 | 1910.7864 | 955.8968        | 1893.7598 | 947.3835         | 1892.7758      | 946.8915         | A    | 2602.1991 | 1301.6032       | 2585.1725 | 1293.0899        | 2584.1885      | 1292.5979        | 24 |
| 18 | 2009.8548 | 1005.4310       | 1992.8282 | 996.9177         | 1991.8442      | 996.4257         | V    | 2531.1620 | 1266.0846       | 2514.1354 | 1257.5713        | 2513.1514      | 1257.0793        | 23 |
| 19 | 2110.9024 | 1055.9549       | 2093.8759 | 1047.4416        | 2092.8919      | 1046.9496        | T    | 2432.0936 | 1216.5504       | 2415.0670 | 1208.0371        | 2414.0830      | 1207.5451        | 22 |

|    |           |           |           |           |           |           |   |                  |           |           |           |           |           |    |
|----|-----------|-----------|-----------|-----------|-----------|-----------|---|------------------|-----------|-----------|-----------|-----------|-----------|----|
| 20 | 2238.9610 | 1119.9842 | 2221.9345 | 1111.4709 | 2220.9505 | 1110.9789 | Q | 2331.0459        | 1166.0266 | 2314.0193 | 1157.5133 | 2313.0353 | 1157.0213 | 21 |
| 21 | 2340.0087 | 1170.5080 | 2322.9822 | 1161.9947 | 2321.9981 | 1161.5027 | T | 2202.9873        | 1101.9973 | 2185.9607 | 1093.4840 | 2184.9767 | 1092.9920 | 20 |
| 22 | 2503.0720 | 1252.0397 | 2486.0455 | 1243.5264 | 2485.0615 | 1243.0344 | Y | 2101.9396        | 1051.4734 | 2084.9131 | 1042.9602 | 2083.9291 | 1042.4682 | 19 |
| 23 | 2560.0935 | 1280.5504 | 2543.0669 | 1272.0371 | 2542.0829 | 1271.5451 | G | 1938.8763        | 969.9418  | 1921.8497 | 961.4285  | 1920.8657 | 960.9365  | 18 |
| 24 | 2617.1150 | 1309.0611 | 2600.0884 | 1300.5478 | 2599.1044 | 1300.0558 | G | 1881.8548        | 941.4310  | 1864.8283 | 932.9178  | 1863.8443 | 932.4258  | 17 |
| 25 | 2731.1579 | 1366.0826 | 2714.1313 | 1357.5693 | 2713.1473 | 1357.0773 | N | 1824.8334        | 912.9203  | 1807.8068 | 904.4070  | 1806.8228 | 903.9150  | 16 |
| 26 | 2818.1899 | 1409.5986 | 2801.1634 | 1401.0853 | 2800.1794 | 1400.5933 | S | 1710.7904        | 855.8989  | 1693.7639 | 847.3856  | 1692.7799 | 846.8936  | 15 |
| 27 | 2932.2328 | 1466.6201 | 2915.2063 | 1458.1068 | 2914.2223 | 1457.6148 | N | 1623.7584        | 812.3828  | 1606.7319 | 803.8696  | 1605.7478 | 803.3776  | 14 |
| 28 | 2989.2543 | 1495.1308 | 2972.2278 | 1486.6175 | 2971.2437 | 1486.1255 | G | 1509.7155        | 755.3614  | 1492.6889 | 746.8481  | 1491.7049 | 746.3561  | 13 |
| 29 | 3118.2969 | 1559.6521 | 3101.2704 | 1551.1388 | 3100.2863 | 1550.6468 | E | 1452.6940        | 726.8506  | 1435.6675 | 718.3374  | 1434.6834 | 717.8454  | 12 |
| 30 | 3215.3497 | 1608.1785 | 3198.3231 | 1599.6652 | 3197.3391 | 1599.1732 | P | <b>1323.6514</b> | 662.3293  | 1306.6249 | 653.8161  | 1305.6409 | 653.3241  | 11 |
| 31 | 3375.3803 | 1688.1938 | 3358.3538 | 1679.6805 | 3357.3697 | 1679.1885 | C | 1226.5987        | 613.8030  | 1209.5721 | 605.2897  | 1208.5881 | 604.7977  | 10 |
| 32 | 3474.4487 | 1737.7280 | 3457.4222 | 1729.2147 | 3456.4382 | 1728.7227 | V | <b>1066.5680</b> | 533.7876  | 1049.5415 | 525.2744  | 1048.5574 | 524.7824  | 9  |
| 33 | 3587.5328 | 1794.2700 | 3570.5062 | 1785.7568 | 3569.5222 | 1785.2648 | L | <b>967.4996</b>  | 484.2534  | 950.4730  | 475.7402  | 949.4890  | 475.2482  | 8  |
| 34 | 3684.5856 | 1842.7964 | 3667.5590 | 1834.2831 | 3666.5750 | 1833.7911 | P | <b>854.4155</b>  | 427.7114  | 837.3890  | 419.1981  | 836.4050  | 418.7061  | 7  |
| 35 | 3831.6540 | 1916.3306 | 3814.6274 | 1907.8173 | 3813.6434 | 1907.3253 | F | <b>757.3628</b>  | 379.1850  | 740.3362  | 370.6717  | 739.3522  | 370.1797  | 6  |
| 36 | 3932.7016 | 1966.8545 | 3915.6751 | 1958.3412 | 3914.6911 | 1957.8492 | T | <b>610.2944</b>  | 305.6508  | 593.2678  | 297.1375  | 592.2838  | 296.6455  | 5  |
| 37 | 4095.7650 | 2048.3861 | 4078.7384 | 2039.8729 | 4077.7544 | 2039.3808 | Y | <b>509.2467</b>  | 255.1270  | 492.2201  | 246.6137  |           |           | 4  |
| 38 | 4209.8079 | 2105.4076 | 4192.7814 | 2096.8943 | 4191.7973 | 2096.4023 | N | <b>346.1833</b>  | 173.5953  | 329.1568  | 165.0820  |           |           | 3  |
| 39 | 4266.8294 | 2133.9183 | 4249.8028 | 2125.4050 | 4248.8188 | 2124.9130 | G | <b>232.1404</b>  | 116.5738  | 215.1139  | 108.0606  |           |           | 2  |
| 40 |           |           |           |           |           |           | R | <b>175.1190</b>  | 88.0631   | 158.0924  | 79.5498   |           |           | 1  |

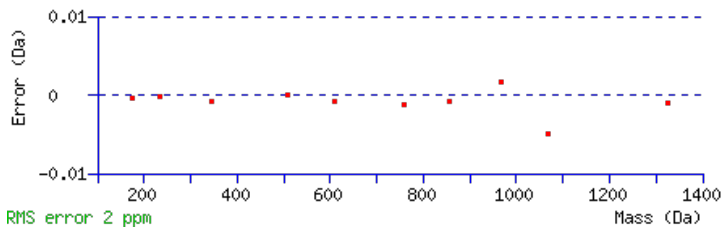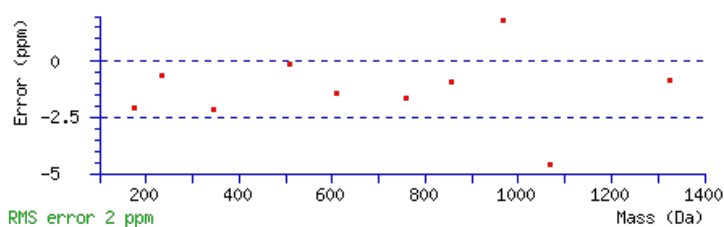

NCBI BLAST search of [QMLCTCLGNGVSCQETA VTQTYGGNSNGEPCVLPFTYNGR](#)

(Parameters: blastp, nr protein database, expect=20000, no filter, PAM30)

Other BLAST [web gateways](#)

All matches to this query

| Score | Mr(calc)  | Delta  | Sequence                                                  |
|-------|-----------|--------|-----------------------------------------------------------|
| 75.1  | 4439.9338 | 0.0048 | <a href="#">QMLCTCLGNGVSCQETA VTQTYGGNSNGEPCVLPFTYNGR</a> |

Mascot: <http://www.matrixscience.com/>

# Mascot Search Results

## Peptide View

MS/MS Fragmentation of **QMLCTCLGNGVSCQETAVTQTYGGNSNGEPCVLPFTYNGR**

Found in **P02751** in **uni\_human\_nr**, FINC\_HUMAN Fibronectin OS=Homo sapiens GN=FN1 PE=1 SV=4

Match to Query 19085: 4439.932816 from(1110.990480,4+) intensity(4664387.0000) rtinseconds(3040) scans(18351) index(14134)

Title: 130801\_HPL\_Human\_Plaque\_BR1\_TR1\_07\_Spectrum035837\_scans\_\_18351\_RTINSECONDS=3040

Data file E:\\RAW\\HumanPlaques\\imgf\\T\\1D\\T130801\_HPL\_Human\_Plaque\_BR1\_TR1\_07.mgf

Click mouse within plot area to zoom in by factor of two about that point

Or, to Da  
 Label all possible matches Label matches used for scoring  
 Show Y-axis

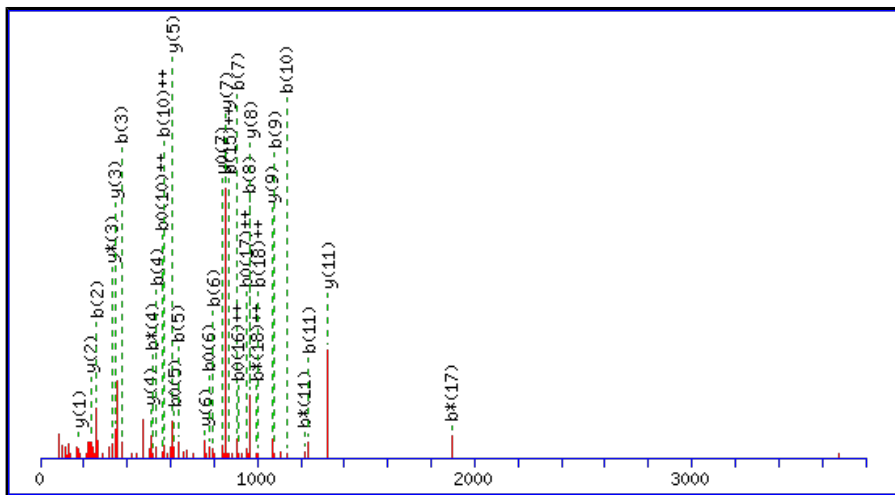

Monoisotopic mass of neutral peptide Mr(calc): 4439.9338

Fixed modifications: Carbamidomethyl (C) (apply to specified residues or termini only)

Ions Score: 68 Expect: 3.6e-006

Matches : 34/452 fragment ions using 64 most intense peaks ([help](#))

| #  | b                | b <sup>++</sup>  | b <sup>*</sup>   | b <sup>*++</sup> | b <sup>0</sup>  | b <sup>0++</sup> | Seq. | y         | y <sup>++</sup> | y <sup>*</sup> | y <sup>*++</sup> | y <sup>0</sup> | y <sup>0++</sup> | #  |
|----|------------------|------------------|------------------|------------------|-----------------|------------------|------|-----------|-----------------|----------------|------------------|----------------|------------------|----|
| 1  | 129.0659         | 65.0366          | 112.0393         | 56.5233          |                 |                  | Q    |           |                 |                |                  |                |                  | 40 |
| 2  | <b>260.1063</b>  | 130.5568         | 243.0798         | 122.0435         |                 |                  | M    | 4312.8825 | 2156.9449       | 4295.8559      | 2148.4316        | 4294.8719      | 2147.9396        | 39 |
| 3  | <b>373.1904</b>  | 187.0988         | 356.1639         | 178.5856         |                 |                  | L    | 4181.8420 | 2091.4246       | 4164.8154      | 2082.9114        | 4163.8314      | 2082.4193        | 38 |
| 4  | <b>533.2211</b>  | 267.1142         | <b>516.1945</b>  | 258.6009         |                 |                  | C    | 4068.7579 | 2034.8826       | 4051.7314      | 2026.3693        | 4050.7474      | 2025.8773        | 37 |
| 5  | <b>634.2687</b>  | 317.6380         | 617.2422         | 309.1247         | <b>616.2582</b> | 308.6327         | T    | 3908.7273 | 1954.8673       | 3891.7007      | 1946.3540        | 3890.7167      | 1945.8620        | 36 |
| 6  | <b>794.2994</b>  | 397.6533         | 777.2728         | 389.1401         | <b>776.2888</b> | 388.6480         | C    | 3807.6796 | 1904.3434       | 3790.6530      | 1895.8302        | 3789.6690      | 1895.3381        | 35 |
| 7  | <b>907.3834</b>  | 454.1954         | 890.3569         | 445.6821         | 889.3729        | 445.1901         | L    | 3647.6489 | 1824.3281       | 3630.6224      | 1815.8148        | 3629.6384      | 1815.3228        | 34 |
| 8  | <b>964.4049</b>  | 482.7061         | 947.3784         | 474.1928         | 946.3943        | 473.7008         | G    | 3534.5649 | 1767.7861       | 3517.5383      | 1759.2728        | 3516.5543      | 1758.7808        | 33 |
| 9  | <b>1078.4478</b> | 539.7276         | 1061.4213        | 531.2143         | 1060.4373       | 530.7223         | N    | 3477.5434 | 1739.2753       | 3460.5169      | 1730.7621        | 3459.5328      | 1730.2701        | 32 |
| 10 | <b>1135.4693</b> | <b>568.2383</b>  | 1118.4428        | 559.7250         | 1117.4587       | <b>559.2330</b>  | G    | 3363.5005 | 1682.2539       | 3346.4739      | 1673.7406        | 3345.4899      | 1673.2486        | 31 |
| 11 | <b>1234.5377</b> | 617.7725         | <b>1217.5112</b> | 609.2592         | 1216.5271       | 608.7672         | V    | 3306.4790 | 1653.7431       | 3289.4525      | 1645.2299        | 3288.4685      | 1644.7379        | 30 |
| 12 | 1321.5697        | 661.2885         | 1304.5432        | 652.7752         | 1303.5592       | 652.2832         | S    | 3207.4106 | 1604.2089       | 3190.3841      | 1595.6957        | 3189.4000      | 1595.2037        | 29 |
| 13 | 1481.6004        | 741.3038         | 1464.5738        | 732.7906         | 1463.5898       | 732.2986         | C    | 3120.3786 | 1560.6929       | 3103.3520      | 1552.1797        | 3102.3680      | 1551.6876        | 28 |
| 14 | 1609.6590        | 805.3331         | 1592.6324        | 796.8198         | 1591.6484       | 796.3278         | Q    | 2960.3479 | 1480.6776       | 2943.3214      | 1472.1643        | 2942.3374      | 1471.6723        | 27 |
| 15 | 1738.7016        | <b>869.8544</b>  | 1721.6750        | 861.3411         | 1720.6910       | 860.8491         | E    | 2832.2894 | 1416.6483       | 2815.2628      | 1408.1350        | 2814.2788      | 1407.6430        | 26 |
| 16 | 1839.7492        | 920.3783         | 1822.7227        | 911.8650         | 1821.7387       | <b>911.3730</b>  | T    | 2703.2468 | 1352.1270       | 2686.2202      | 1343.6137        | 2685.2362      | 1343.1217        | 25 |
| 17 | 1910.7864        | 955.8968         | <b>1893.7598</b> | 947.3835         | 1892.7758       | <b>946.8915</b>  | A    | 2602.1991 | 1301.6032       | 2585.1725      | 1293.0899        | 2584.1885      | 1292.5979        | 24 |
| 18 | 2009.8548        | <b>1005.4310</b> | 1992.8282        | <b>996.9177</b>  | 1991.8442       | 996.4257         | V    | 2531.1620 | 1266.0846       | 2514.1354      | 1257.5713        | 2513.1514      | 1257.0793        | 23 |
| 19 | 2110.9024        | 1055.9549        | 2093.8759        | 1047.4416        | 2092.8919       | 1046.9496        | T    | 2432.0936 | 1216.5504       | 2415.0670      | 1208.0371        | 2414.0830      | 1207.5451        | 22 |

|    |           |           |           |           |           |           |   |                  |           |                 |           |                 |           |    |
|----|-----------|-----------|-----------|-----------|-----------|-----------|---|------------------|-----------|-----------------|-----------|-----------------|-----------|----|
| 20 | 2238.9610 | 1119.9842 | 2221.9345 | 1111.4709 | 2220.9505 | 1110.9789 | Q | 2331.0459        | 1166.0266 | 2314.0193       | 1157.5133 | 2313.0353       | 1157.0213 | 21 |
| 21 | 2340.0087 | 1170.5080 | 2322.9822 | 1161.9947 | 2321.9981 | 1161.5027 | T | 2202.9873        | 1101.9973 | 2185.9607       | 1093.4840 | 2184.9767       | 1092.9920 | 20 |
| 22 | 2503.0720 | 1252.0397 | 2486.0455 | 1243.5264 | 2485.0615 | 1243.0344 | Y | 2101.9396        | 1051.4734 | 2084.9131       | 1042.9602 | 2083.9291       | 1042.4682 | 19 |
| 23 | 2560.0935 | 1280.5504 | 2543.0669 | 1272.0371 | 2542.0829 | 1271.5451 | G | 1938.8763        | 969.9418  | 1921.8497       | 961.4285  | 1920.8657       | 960.9365  | 18 |
| 24 | 2617.1150 | 1309.0611 | 2600.0884 | 1300.5478 | 2599.1044 | 1300.0558 | G | 1881.8548        | 941.4310  | 1864.8283       | 932.9178  | 1863.8443       | 932.4258  | 17 |
| 25 | 2731.1579 | 1366.0826 | 2714.1313 | 1357.5693 | 2713.1473 | 1357.0773 | N | 1824.8334        | 912.9203  | 1807.8068       | 904.4070  | 1806.8228       | 903.9150  | 16 |
| 26 | 2818.1899 | 1409.5986 | 2801.1634 | 1401.0853 | 2800.1794 | 1400.5933 | S | 1710.7904        | 855.8989  | 1693.7639       | 847.3856  | 1692.7799       | 846.8936  | 15 |
| 27 | 2932.2328 | 1466.6201 | 2915.2063 | 1458.1068 | 2914.2223 | 1457.6148 | N | 1623.7584        | 812.3828  | 1606.7319       | 803.8696  | 1605.7478       | 803.3776  | 14 |
| 28 | 2989.2543 | 1495.1308 | 2972.2278 | 1486.6175 | 2971.2437 | 1486.1255 | G | 1509.7155        | 755.3614  | 1492.6889       | 746.8481  | 1491.7049       | 746.3561  | 13 |
| 29 | 3118.2969 | 1559.6521 | 3101.2704 | 1551.1388 | 3100.2863 | 1550.6468 | E | 1452.6940        | 726.8506  | 1435.6675       | 718.3374  | 1434.6834       | 717.8454  | 12 |
| 30 | 3215.3497 | 1608.1785 | 3198.3231 | 1599.6652 | 3197.3391 | 1599.1732 | P | <b>1323.6514</b> | 662.3293  | 1306.6249       | 653.8161  | 1305.6409       | 653.3241  | 11 |
| 31 | 3375.3803 | 1688.1938 | 3358.3538 | 1679.6805 | 3357.3697 | 1679.1885 | C | 1226.5987        | 613.8030  | 1209.5721       | 605.2897  | 1208.5881       | 604.7977  | 10 |
| 32 | 3474.4487 | 1737.7280 | 3457.4222 | 1729.2147 | 3456.4382 | 1728.7227 | V | <b>1066.5680</b> | 533.7876  | 1049.5415       | 525.2744  | 1048.5574       | 524.7824  | 9  |
| 33 | 3587.5328 | 1794.2700 | 3570.5062 | 1785.7568 | 3569.5222 | 1785.2648 | L | <b>967.4996</b>  | 484.2534  | 950.4730        | 475.7402  | 949.4890        | 475.2482  | 8  |
| 34 | 3684.5856 | 1842.7964 | 3667.5590 | 1834.2831 | 3666.5750 | 1833.7911 | P | <b>854.4155</b>  | 427.7114  | 837.3890        | 419.1981  | <b>836.4050</b> | 418.7061  | 7  |
| 35 | 3831.6540 | 1916.3306 | 3814.6274 | 1907.8173 | 3813.6434 | 1907.3253 | F | <b>757.3628</b>  | 379.1850  | 740.3362        | 370.6717  | 739.3522        | 370.1797  | 6  |
| 36 | 3932.7016 | 1966.8545 | 3915.6751 | 1958.3412 | 3914.6911 | 1957.8492 | T | <b>610.2944</b>  | 305.6508  | 593.2678        | 297.1375  | 592.2838        | 296.6455  | 5  |
| 37 | 4095.7650 | 2048.3861 | 4078.7384 | 2039.8729 | 4077.7544 | 2039.3808 | Y | <b>509.2467</b>  | 255.1270  | 492.2201        | 246.6137  |                 |           | 4  |
| 38 | 4209.8079 | 2105.4076 | 4192.7814 | 2096.8943 | 4191.7973 | 2096.4023 | N | <b>346.1833</b>  | 173.5953  | <b>329.1568</b> | 165.0820  |                 |           | 3  |
| 39 | 4266.8294 | 2133.9183 | 4249.8028 | 2125.4050 | 4248.8188 | 2124.9130 | G | <b>232.1404</b>  | 116.5738  | 215.1139        | 108.0606  |                 |           | 2  |
| 40 |           |           |           |           |           |           | R | <b>175.1190</b>  | 88.0631   | 158.0924        | 79.5498   |                 |           | 1  |

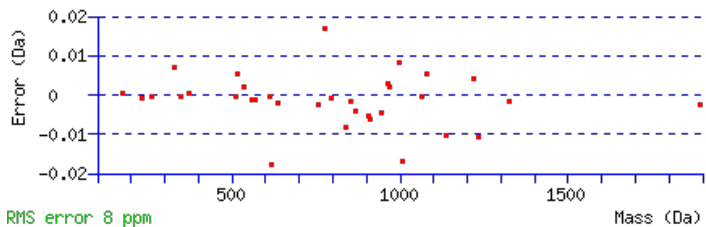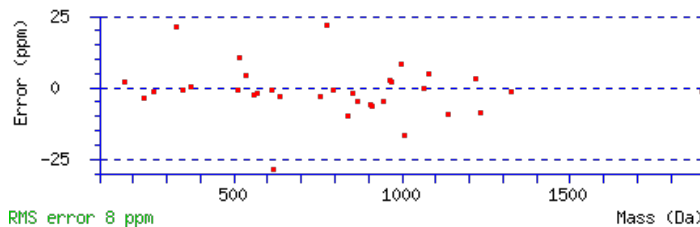

NCBI BLAST search of [QMLCTCLGNGVSCQETA VTQTYGGNSNGEPCVLPFTYNGR](#)

(Parameters: blastp, nr protein database, expect=20000, no filter, PAM30)

Other BLAST [web gateways](#)

All matches to this query

| Score | Mr(calc)  | Delta   | Sequence                                                  |
|-------|-----------|---------|-----------------------------------------------------------|
| 68.3  | 4439.9338 | -0.0010 | <a href="#">QMLCTCLGNGVSCQETA VTQTYGGNSNGEPCVLPFTYNGR</a> |

Mascot: <http://www.matrixscience.com/>

# Mascot Search Results

## Peptide View

MS/MS Fragmentation of **TQGNKQMLCTCLGNGVSCQETAVTQTYGGNSNGEPCVLPFTYNGR**  
 Found in **P02751** in **uni\_human\_nr**, FINC\_HUMAN Fibronectin OS=Homo sapiens GN=FN1 PE=1 SV=4

Match to Query 20159: 4987.187696 from(1247.804200,4+) intensity(1131854.8750) rtinseconds(2674) scans(16239) index(12826)  
 Title: 130809\_HPL\_Human\_Plaque\_BR2\_TR3\_06\_Spectrum034866\_scans\_\_16239\_RTINSECONDS=2674  
 Data file E:\\RAW\\HumanPlaques\\imgf\\T\\1D\\T130809\_HPL\_Human\_Plaque\_BR2\_TR3\_06.mgf

Click mouse within plot area to zoom in by factor of two about that point

Or, to Da  
 Label all possible matches Label matches used for scoring  
 Show Y-axis

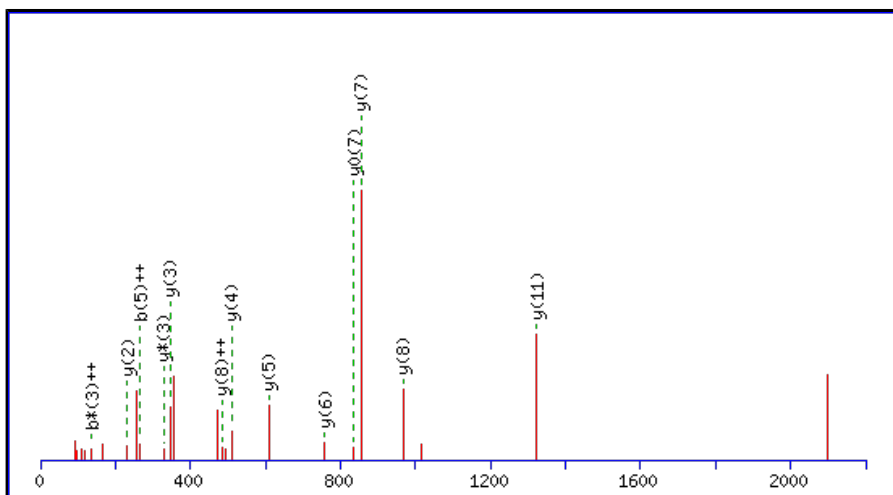

Monoisotopic mass of neutral peptide **Mr(calc): 4986.1624**  
**Fixed modifications:** Carbamidomethyl (C) (apply to specified residues or termini only)  
**Variable modifications:**  
 Q2 : Deamidated (NQ)  
 N4 : Deamidated (NQ)  
 M7 : Oxidation (M), with neutral losses 0.0000(shown in table), 63.9983  
**Ions Score:** 34 **Expect:** 0.0089  
**Matches :** 13/782 fragment ions using 26 most intense peaks ([help](#))

| #  | b         | b <sup>++</sup> | b <sup>*</sup> | b <sup>***</sup> | b <sup>0</sup> | b <sup>0++</sup> | Seq. | y         | y <sup>++</sup> | y <sup>*</sup> | y <sup>***</sup> | y <sup>0</sup> | y <sup>0++</sup> | #  |
|----|-----------|-----------------|----------------|------------------|----------------|------------------|------|-----------|-----------------|----------------|------------------|----------------|------------------|----|
| 1  | 102.0550  | 51.5311         |                |                  | 84.0444        | 42.5258          | T    |           |                 |                |                  |                |                  | 45 |
| 2  | 231.0975  | 116.0524        | 214.0710       | 107.5391         | 213.0870       | 107.0471         | Q    | 4886.1219 | 2443.5646       | 4869.0954      | 2435.0513        | 4868.1114      | 2434.5593        | 44 |
| 3  | 288.1190  | 144.5631        | 271.0925       | 136.0499         | 270.1084       | 135.5579         | G    | 4757.0793 | 2379.0433       | 4740.0528      | 2370.5300        | 4739.0688      | 2370.0380        | 43 |
| 4  | 403.1460  | 202.0766        | 386.1194       | 193.5633         | 385.1354       | 193.0713         | N    | 4700.0579 | 2350.5326       | 4683.0313      | 2342.0193        | 4682.0473      | 2341.5273        | 42 |
| 5  | 531.2409  | 266.1241        | 514.2144       | 257.6108         | 513.2304       | 257.1188         | K    | 4585.0309 | 2293.0191       | 4568.0044      | 2284.5058        | 4567.0204      | 2284.0138        | 41 |
| 6  | 659.2995  | 330.1534        | 642.2729       | 321.6401         | 641.2889       | 321.1481         | Q    | 4456.9360 | 2228.9716       | 4439.9094      | 2220.4583        | 4438.9254      | 2219.9663        | 40 |
| 7  | 806.3349  | 403.6711        | 789.3083       | 395.1578         | 788.3243       | 394.6658         | M    | 4328.8774 | 2164.9423       | 4311.8508      | 2156.4291        | 4310.8668      | 2155.9370        | 39 |
| 8  | 919.4190  | 460.2131        | 902.3924       | 451.6998         | 901.4084       | 451.2078         | L    | 4181.8420 | 2091.4246       | 4164.8154      | 2082.9114        | 4163.8314      | 2082.4193        | 38 |
| 9  | 1079.4496 | 540.2284        | 1062.4231      | 531.7152         | 1061.4390      | 531.2232         | C    | 4068.7579 | 2034.8826       | 4051.7314      | 2026.3693        | 4050.7474      | 2025.8773        | 37 |
| 10 | 1180.4973 | 590.7523        | 1163.4707      | 582.2390         | 1162.4867      | 581.7470         | T    | 3908.7273 | 1954.8673       | 3891.7007      | 1946.3540        | 3890.7167      | 1945.8620        | 36 |
| 11 | 1340.5279 | 670.7676        | 1323.5014      | 662.2543         | 1322.5174      | 661.7623         | C    | 3807.6796 | 1904.3434       | 3790.6530      | 1895.8302        | 3789.6690      | 1895.3381        | 35 |
| 12 | 1453.6120 | 727.3096        | 1436.5855      | 718.7964         | 1435.6014      | 718.3044         | L    | 3647.6489 | 1824.3281       | 3630.6224      | 1815.8148        | 3629.6384      | 1815.3228        | 34 |
| 13 | 1510.6335 | 755.8204        | 1493.6069      | 747.3071         | 1492.6229      | 746.8151         | G    | 3534.5649 | 1767.7861       | 3517.5383      | 1759.2728        | 3516.5543      | 1758.7808        | 33 |
| 14 | 1624.6764 | 812.8418        | 1607.6498      | 804.3286         | 1606.6658      | 803.8366         | N    | 3477.5434 | 1739.2753       | 3460.5169      | 1730.7621        | 3459.5328      | 1730.2701        | 32 |
| 15 | 1681.6979 | 841.3526        | 1664.6713      | 832.8393         | 1663.6873      | 832.3473         | G    | 3363.5005 | 1682.2539       | 3346.4739      | 1673.7406        | 3345.4899      | 1673.2486        | 31 |
| 16 | 1780.7663 | 890.8868        | 1763.7397      | 882.3735         | 1762.7557      | 881.8815         | V    | 3306.4790 | 1653.7431       | 3289.4525      | 1645.2299        | 3288.4685      | 1644.7379        | 30 |
| 17 | 1867.7983 | 934.4028        | 1850.7718      | 925.8895         | 1849.7877      | 925.3975         | S    | 3207.4106 | 1604.2089       | 3190.3841      | 1595.6957        | 3189.4000      | 1595.2037        | 29 |

|    |           |           |           |           |           |           |   |           |           |           |           |           |           |    |
|----|-----------|-----------|-----------|-----------|-----------|-----------|---|-----------|-----------|-----------|-----------|-----------|-----------|----|
| 18 | 2027.8289 | 1014.4181 | 2010.8024 | 1005.9048 | 2009.8184 | 1005.4128 | C | 3120.3786 | 1560.6929 | 3103.3520 | 1552.1797 | 3102.3680 | 1551.6876 | 28 |
| 19 | 2155.8875 | 1078.4474 | 2138.8610 | 1069.9341 | 2137.8770 | 1069.4421 | Q | 2960.3479 | 1480.6776 | 2943.3214 | 1472.1643 | 2942.3374 | 1471.6723 | 27 |
| 20 | 2284.9301 | 1142.9687 | 2267.9036 | 1134.4554 | 2266.9196 | 1133.9634 | E | 2832.2894 | 1416.6483 | 2815.2628 | 1408.1350 | 2814.2788 | 1407.6430 | 26 |
| 21 | 2385.9778 | 1193.4925 | 2368.9512 | 1184.9793 | 2367.9672 | 1184.4873 | T | 2703.2468 | 1352.1270 | 2686.2202 | 1343.6137 | 2685.2362 | 1343.1217 | 25 |
| 22 | 2457.0149 | 1229.0111 | 2439.9884 | 1220.4978 | 2439.0043 | 1220.0058 | A | 2602.1991 | 1301.6032 | 2585.1725 | 1293.0899 | 2584.1885 | 1292.5979 | 24 |
| 23 | 2556.0833 | 1278.5453 | 2539.0568 | 1270.0320 | 2538.0728 | 1269.5400 | V | 2531.1620 | 1266.0846 | 2514.1354 | 1257.5713 | 2513.1514 | 1257.0793 | 23 |
| 24 | 2657.1310 | 1329.0691 | 2640.1045 | 1320.5559 | 2639.1204 | 1320.0639 | T | 2432.0936 | 1216.5504 | 2415.0670 | 1208.0371 | 2414.0830 | 1207.5451 | 22 |
| 25 | 2785.1896 | 1393.0984 | 2768.1630 | 1384.5852 | 2767.1790 | 1384.0931 | Q | 2331.0459 | 1166.0266 | 2314.0193 | 1157.5133 | 2313.0353 | 1157.0213 | 21 |
| 26 | 2886.2373 | 1443.6223 | 2869.2107 | 1435.1090 | 2868.2267 | 1434.6170 | T | 2202.9873 | 1101.9973 | 2185.9607 | 1093.4840 | 2184.9767 | 1092.9920 | 20 |
| 27 | 3049.3006 | 1525.1539 | 3032.2740 | 1516.6407 | 3031.2900 | 1516.1487 | Y | 2101.9396 | 1051.4734 | 2084.9131 | 1042.9602 | 2083.9291 | 1042.4682 | 19 |
| 28 | 3106.3221 | 1553.6647 | 3089.2955 | 1545.1514 | 3088.3115 | 1544.6594 | G | 1938.8763 | 969.9418  | 1921.8497 | 961.4285  | 1920.8657 | 960.9365  | 18 |
| 29 | 3163.3435 | 1582.1754 | 3146.3170 | 1573.6621 | 3145.3330 | 1573.1701 | G | 1881.8548 | 941.4310  | 1864.8283 | 932.9178  | 1863.8443 | 932.4258  | 17 |
| 30 | 3277.3864 | 1639.1969 | 3260.3599 | 1630.6836 | 3259.3759 | 1630.1916 | N | 1824.8334 | 912.9203  | 1807.8068 | 904.4070  | 1806.8228 | 903.9150  | 16 |
| 31 | 3364.4185 | 1682.7129 | 3347.3919 | 1674.1996 | 3346.4079 | 1673.7076 | S | 1710.7904 | 855.8989  | 1693.7639 | 847.3856  | 1692.7799 | 846.8936  | 15 |
| 32 | 3478.4614 | 1739.7343 | 3461.4349 | 1731.2211 | 3460.4508 | 1730.7291 | N | 1623.7584 | 812.3828  | 1606.7319 | 803.8696  | 1605.7478 | 803.3776  | 14 |
| 33 | 3535.4829 | 1768.2451 | 3518.4563 | 1759.7318 | 3517.4723 | 1759.2398 | G | 1509.7155 | 755.3614  | 1492.6889 | 746.8481  | 1491.7049 | 746.3561  | 13 |
| 34 | 3664.5255 | 1832.7664 | 3647.4989 | 1824.2531 | 3646.5149 | 1823.7611 | E | 1452.6940 | 726.8506  | 1435.6675 | 718.3374  | 1434.6834 | 717.8454  | 12 |
| 35 | 3761.5782 | 1881.2927 | 3744.5517 | 1872.7795 | 3743.5677 | 1872.2875 | P | 1323.6514 | 662.3293  | 1306.6249 | 653.8161  | 1305.6409 | 653.3241  | 11 |
| 36 | 3921.6089 | 1961.3081 | 3904.5823 | 1952.7948 | 3903.5983 | 1952.3028 | C | 1226.5987 | 613.8030  | 1209.5721 | 605.2897  | 1208.5881 | 604.7977  | 10 |
| 37 | 4020.6773 | 2010.8423 | 4003.6507 | 2002.3290 | 4002.6667 | 2001.8370 | V | 1066.5680 | 533.7876  | 1049.5415 | 525.2744  | 1048.5574 | 524.7824  | 9  |
| 38 | 4133.7613 | 2067.3843 | 4116.7348 | 2058.8710 | 4115.7508 | 2058.3790 | L | 967.4996  | 484.2534  | 950.4730  | 475.7402  | 949.4890  | 475.2482  | 8  |
| 39 | 4230.8141 | 2115.9107 | 4213.7876 | 2107.3974 | 4212.8035 | 2106.9054 | P | 854.4155  | 427.7114  | 837.3890  | 419.1981  | 836.4050  | 418.7061  | 7  |
| 40 | 4377.8825 | 2189.4449 | 4360.8560 | 2180.9316 | 4359.8720 | 2180.4396 | F | 757.3628  | 379.1850  | 740.3362  | 370.6717  | 739.3522  | 370.1797  | 6  |
| 41 | 4478.9302 | 2239.9687 | 4461.9037 | 2231.4555 | 4460.9196 | 2230.9635 | T | 610.2944  | 305.6508  | 593.2678  | 297.1375  | 592.2838  | 296.6455  | 5  |
| 42 | 4641.9935 | 2321.5004 | 4624.9670 | 2312.9871 | 4623.9830 | 2312.4951 | Y | 509.2467  | 255.1270  | 492.2201  | 246.6137  |           |           | 4  |
| 43 | 4756.0365 | 2378.5219 | 4739.0099 | 2370.0086 | 4738.0259 | 2369.5166 | N | 346.1833  | 173.5953  | 329.1568  | 165.0820  |           |           | 3  |
| 44 | 4813.0579 | 2407.0326 | 4796.0314 | 2398.5193 | 4795.0474 | 2398.0273 | G | 232.1404  | 116.5738  | 215.1139  | 108.0606  |           |           | 2  |
| 45 |           |           |           |           |           |           | R | 175.1190  | 88.0631   | 158.0924  | 79.5498   |           |           | 1  |

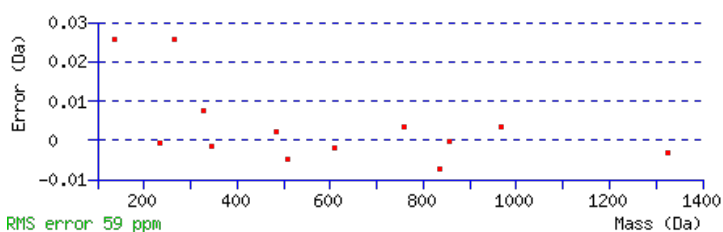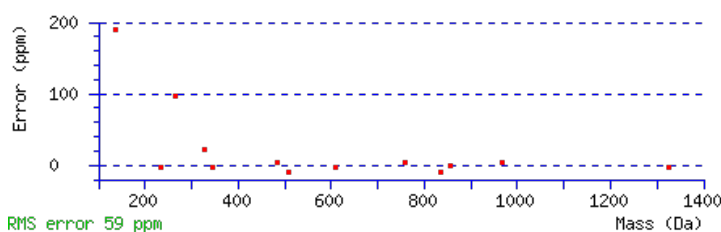

NCBI BLAST search of [TOGNKQMLCTCLGNGVSCOETA VTQTYGGNSNGEPCVLPFTYNGR](#)

(Parameters: blastp, nr protein database, expect=20000, no filter, PAM30)

Other BLAST [web gateways](#)

All matches to this query

| Score | Mr(calc)  | Delta  | Sequence                                                       | Site Analysis             |
|-------|-----------|--------|----------------------------------------------------------------|---------------------------|
| 33.5  | 4986.1624 | 1.0253 | <a href="#">TOGNKQMLCTCLGNGVSCOETA VTQTYGGNSNGEPCVLPFTYNGR</a> | Deamidated Q2, N4 3.38%   |
| 33.5  | 4985.1783 | 2.0094 | <a href="#">TOGNKQMLCTCLGNGVSCOETA VTQTYGGNSNGEPCVLPFTYNGR</a> |                           |
| 33.5  | 4985.1783 | 2.0094 | <a href="#">TOGNKQMLCTCLGNGVSCOETA VTQTYGGNSNGEPCVLPFTYNGR</a> |                           |
| 33.5  | 4986.1624 | 1.0253 | <a href="#">TOGNKQMLCTCLGNGVSCOETA VTQTYGGNSNGEPCVLPFTYNGR</a> | Deamidated N30, N32 3.38% |
| 33.5  | 4985.1783 | 2.0094 | <a href="#">TOGNKQMLCTCLGNGVSCOETA VTQTYGGNSNGEPCVLPFTYNGR</a> |                           |
| 33.5  | 4986.1624 | 1.0253 | <a href="#">TOGNKQMLCTCLGNGVSCOETA VTQTYGGNSNGEPCVLPFTYNGR</a> | Deamidated Q25, N30 3.38% |
| 33.5  | 4985.1783 | 2.0094 | <a href="#">TOGNKQMLCTCLGNGVSCOETA VTQTYGGNSNGEPCVLPFTYNGR</a> |                           |
| 33.5  | 4986.1624 | 1.0253 | <a href="#">TOGNKQMLCTCLGNGVSCOETA VTQTYGGNSNGEPCVLPFTYNGR</a> | Deamidated Q19, Q25 3.38% |
| 33.5  | 4985.1783 | 2.0094 | <a href="#">TOGNKQMLCTCLGNGVSCOETA VTQTYGGNSNGEPCVLPFTYNGR</a> |                           |

|      |           |        |                                                                 |                           |
|------|-----------|--------|-----------------------------------------------------------------|---------------------------|
| 33.5 | 4986.1624 | 1.0253 | <a href="#">TQGNKQMLCTCLGNGVSCQETA V TQTYGGNSNGEPCVLPFTYNGR</a> | Deamidated N14, Q19 3.38% |
|------|-----------|--------|-----------------------------------------------------------------|---------------------------|

**Mascot:** <http://www.matrixscience.com/>



# Mascot Search Results

## Peptide View

MS/MS Fragmentation of **TQGNKQMLCTCLGNGVSCQETAVTQTYGGNSNGEPCVLPFTYNGR**  
 Found in **P02751** in **uni\_human\_nr**, FINC\_HUMAN Fibronectin OS=Homo sapiens GN=FN1 PE=1 SV=4

Match to Query 20002: 4987.199896 from(1247.807250,4+) intensity(1689172.8750) rtinseconds(2692) scans(16187) index(12672)  
 Title: 130806\_HPL\_Human\_Plaque\_BR2\_TR2\_06\_Spectrum034477\_scans\_\_16187\_RTINSECONDS=2692  
 Data file E:\\RAW\\HumanPlaques\\imgf\\T\\1D\\T130806\_HPL\_Human\_Plaque\_BR2\_TR2\_06.mgf

Click mouse within plot area to zoom in by factor of two about that point

Or, to Da  
 Label all possible matches Label matches used for scoring  
 Show Y-axis

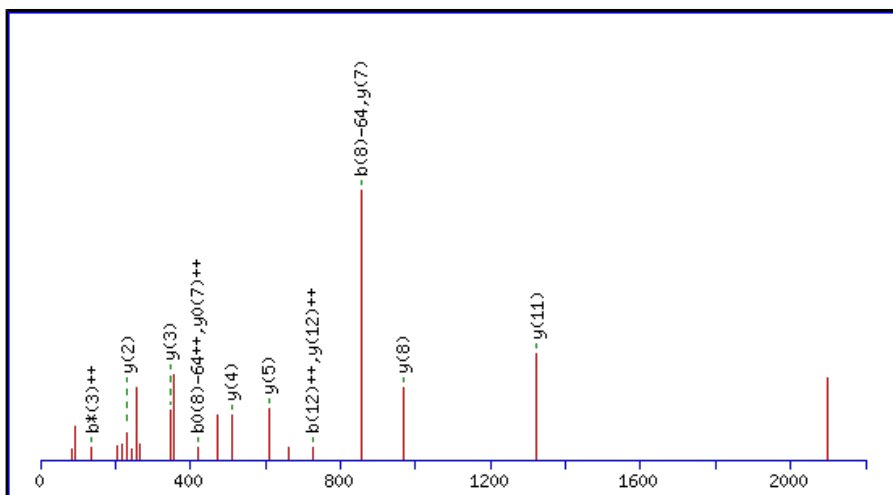

Monoisotopic mass of neutral peptide **Mr(calc):** 4985.1783  
**Fixed modifications:** Carbamidomethyl (C) (apply to specified residues or termini only)  
**Variable modifications:**  
 Q2 : Deamidated (NQ)  
 M7 : Oxidation (M), with neutral losses 63.9983(shown in table), 0.0000  
**Ions Score:** 36 **Expect:** 0.0055  
**Matches :** 13/782 fragment ions using 19 most intense peaks ([help](#))

| #  | b         | b <sup>++</sup> | b <sup>*</sup> | b <sup>*++</sup> | b <sup>0</sup> | b <sup>0++</sup> | Seq. | y         | y <sup>++</sup> | y <sup>*</sup> | y <sup>*++</sup> | y <sup>0</sup> | y <sup>0++</sup> | #  |
|----|-----------|-----------------|----------------|------------------|----------------|------------------|------|-----------|-----------------|----------------|------------------|----------------|------------------|----|
| 1  | 102.0550  | 51.5311         |                |                  | 84.0444        | 42.5258          | T    |           |                 |                |                  |                |                  | 45 |
| 2  | 231.0975  | 116.0524        | 214.0710       | 107.5391         | 213.0870       | 107.0471         | Q    | 4821.1396 | 2411.0734       | 4804.1131      | 2402.5602        | 4803.1291      | 2402.0682        | 44 |
| 3  | 288.1190  | 144.5631        | 271.0925       | 136.0499         | 270.1084       | 135.5579         | G    | 4692.0970 | 2346.5522       | 4675.0705      | 2338.0389        | 4674.0865      | 2337.5469        | 43 |
| 4  | 402.1619  | 201.5846        | 385.1354       | 193.0713         | 384.1514       | 192.5793         | N    | 4635.0756 | 2318.0414       | 4618.0490      | 2309.5281        | 4617.0650      | 2309.0361        | 42 |
| 5  | 530.2569  | 265.6321        | 513.2304       | 257.1188         | 512.2463       | 256.6268         | K    | 4521.0326 | 2261.0200       | 4504.0061      | 2252.5067        | 4503.0221      | 2252.0147        | 41 |
| 6  | 658.3155  | 329.6614        | 641.2889       | 321.1481         | 640.3049       | 320.6561         | Q    | 4392.9377 | 2196.9725       | 4375.9111      | 2188.4592        | 4374.9271      | 2187.9672        | 40 |
| 7  | 741.3526  | 371.1799        | 724.3260       | 362.6667         | 723.3420       | 362.1747         | M    | 4264.8791 | 2132.9432       | 4247.8525      | 2124.4299        | 4246.8685      | 2123.9379        | 39 |
| 8  | 854.4367  | 427.7220        | 837.4101       | 419.2087         | 836.4261       | 418.7167         | L    | 4181.8420 | 2091.4246       | 4164.8154      | 2082.9114        | 4163.8314      | 2082.4193        | 38 |
| 9  | 1014.4673 | 507.7373        | 997.4408       | 499.2240         | 996.4567       | 498.7320         | C    | 4068.7579 | 2034.8826       | 4051.7314      | 2026.3693        | 4050.7474      | 2025.8773        | 37 |
| 10 | 1115.5150 | 558.2611        | 1098.4884      | 549.7479         | 1097.5044      | 549.2558         | T    | 3908.7273 | 1954.8673       | 3891.7007      | 1946.3540        | 3890.7167      | 1945.8620        | 36 |
| 11 | 1275.5456 | 638.2765        | 1258.5191      | 629.7632         | 1257.5351      | 629.2712         | C    | 3807.6796 | 1904.3434       | 3790.6530      | 1895.8302        | 3789.6690      | 1895.3381        | 35 |
| 12 | 1388.6297 | 694.8185        | 1371.6032      | 686.3052         | 1370.6191      | 685.8132         | L    | 3647.6489 | 1824.3281       | 3630.6224      | 1815.8148        | 3629.6384      | 1815.3228        | 34 |
| 13 | 1445.6512 | 723.3292        | 1428.6246      | 714.8159         | 1427.6406      | 714.3239         | G    | 3534.5649 | 1767.7861       | 3517.5383      | 1759.2728        | 3516.5543      | 1758.7808        | 33 |
| 14 | 1559.6941 | 780.3507        | 1542.6675      | 771.8374         | 1541.6835      | 771.3454         | N    | 3477.5434 | 1739.2753       | 3460.5169      | 1730.7621        | 3459.5328      | 1730.2701        | 32 |
| 15 | 1616.7156 | 808.8614        | 1599.6890      | 800.3481         | 1598.7050      | 799.8561         | G    | 3363.5005 | 1682.2539       | 3346.4739      | 1673.7406        | 3345.4899      | 1673.2486        | 31 |
| 16 | 1715.7840 | 858.3956        | 1698.7574      | 849.8823         | 1697.7734      | 849.3903         | V    | 3306.4790 | 1653.7431       | 3289.4525      | 1645.2299        | 3288.4685      | 1644.7379        | 30 |
| 17 | 1802.8160 | 901.9116        | 1785.7894      | 893.3984         | 1784.8054      | 892.9064         | S    | 3207.4106 | 1604.2089       | 3190.3841      | 1595.6957        | 3189.4000      | 1595.2037        | 29 |

|    |           |           |           |           |           |           |   |           |           |           |           |           |           |    |
|----|-----------|-----------|-----------|-----------|-----------|-----------|---|-----------|-----------|-----------|-----------|-----------|-----------|----|
| 18 | 1962.8466 | 981.9270  | 1945.8201 | 973.4137  | 1944.8361 | 972.9217  | C | 3120.3786 | 1560.6929 | 3103.3520 | 1552.1797 | 3102.3680 | 1551.6876 | 28 |
| 19 | 2090.9052 | 1045.9563 | 2073.8787 | 1037.4430 | 2072.8947 | 1036.9510 | Q | 2960.3479 | 1480.6776 | 2943.3214 | 1472.1643 | 2942.3374 | 1471.6723 | 27 |
| 20 | 2219.9478 | 1110.4775 | 2202.9213 | 1101.9643 | 2201.9373 | 1101.4723 | E | 2832.2894 | 1416.6483 | 2815.2628 | 1408.1350 | 2814.2788 | 1407.6430 | 26 |
| 21 | 2320.9955 | 1161.0014 | 2303.9689 | 1152.4881 | 2302.9849 | 1151.9961 | T | 2703.2468 | 1352.1270 | 2686.2202 | 1343.6137 | 2685.2362 | 1343.1217 | 25 |
| 22 | 2392.0326 | 1196.5199 | 2375.0061 | 1188.0067 | 2374.0220 | 1187.5147 | A | 2602.1991 | 1301.6032 | 2585.1725 | 1293.0899 | 2584.1885 | 1292.5979 | 24 |
| 23 | 2491.1010 | 1246.0542 | 2474.0745 | 1237.5409 | 2473.0905 | 1237.0489 | V | 2531.1620 | 1266.0846 | 2514.1354 | 1257.5713 | 2513.1514 | 1257.0793 | 23 |
| 24 | 2592.1487 | 1296.5780 | 2575.1222 | 1288.0647 | 2574.1381 | 1287.5727 | T | 2432.0936 | 1216.5504 | 2415.0670 | 1208.0371 | 2414.0830 | 1207.5451 | 22 |
| 25 | 2720.2073 | 1360.6073 | 2703.1807 | 1352.0940 | 2702.1967 | 1351.6020 | Q | 2331.0459 | 1166.0266 | 2314.0193 | 1157.5133 | 2313.0353 | 1157.0213 | 21 |
| 26 | 2821.2550 | 1411.1311 | 2804.2284 | 1402.6178 | 2803.2444 | 1402.1258 | T | 2202.9873 | 1101.9973 | 2185.9607 | 1093.4840 | 2184.9767 | 1092.9920 | 20 |
| 27 | 2984.3183 | 1492.6628 | 2967.2917 | 1484.1495 | 2966.3077 | 1483.6575 | Y | 2101.9396 | 1051.4734 | 2084.9131 | 1042.9602 | 2083.9291 | 1042.4682 | 19 |
| 28 | 3041.3398 | 1521.1735 | 3024.3132 | 1512.6602 | 3023.3292 | 1512.1682 | G | 1938.8763 | 969.9418  | 1921.8497 | 961.4285  | 1920.8657 | 960.9365  | 18 |
| 29 | 3098.3612 | 1549.6842 | 3081.3347 | 1541.1710 | 3080.3507 | 1540.6790 | G | 1881.8548 | 941.4310  | 1864.8283 | 932.9178  | 1863.8443 | 932.4258  | 17 |
| 30 | 3212.4041 | 1606.7057 | 3195.3776 | 1598.1924 | 3194.3936 | 1597.7004 | N | 1824.8334 | 912.9203  | 1807.8068 | 904.4070  | 1806.8228 | 903.9150  | 16 |
| 31 | 3299.4362 | 1650.2217 | 3282.4096 | 1641.7084 | 3281.4256 | 1641.2164 | S | 1710.7904 | 855.8989  | 1693.7639 | 847.3856  | 1692.7799 | 846.8936  | 15 |
| 32 | 3413.4791 | 1707.2432 | 3396.4526 | 1698.7299 | 3395.4685 | 1698.2379 | N | 1623.7584 | 812.3828  | 1606.7319 | 803.8696  | 1605.7478 | 803.3776  | 14 |
| 33 | 3470.5006 | 1735.7539 | 3453.4740 | 1727.2406 | 3452.4900 | 1726.7486 | G | 1509.7155 | 755.3614  | 1492.6889 | 746.8481  | 1491.7049 | 746.3561  | 13 |
| 34 | 3599.5432 | 1800.2752 | 3582.5166 | 1791.7619 | 3581.5326 | 1791.2699 | E | 1452.6940 | 726.8506  | 1435.6675 | 718.3374  | 1434.6834 | 717.8454  | 12 |
| 35 | 3696.5959 | 1848.8016 | 3679.5694 | 1840.2883 | 3678.5854 | 1839.7963 | P | 1323.6514 | 662.3293  | 1306.6249 | 653.8161  | 1305.6409 | 653.3241  | 11 |
| 36 | 3856.6266 | 1928.8169 | 3839.6000 | 1920.3036 | 3838.6160 | 1919.8116 | C | 1226.5987 | 613.8030  | 1209.5721 | 605.2897  | 1208.5881 | 604.7977  | 10 |
| 37 | 3955.6950 | 1978.3511 | 3938.6684 | 1969.8379 | 3937.6844 | 1969.3458 | V | 1066.5680 | 533.7876  | 1049.5415 | 525.2744  | 1048.5574 | 524.7824  | 9  |
| 38 | 4068.7790 | 2034.8932 | 4051.7525 | 2026.3799 | 4050.7685 | 2025.8879 | L | 967.4996  | 484.2534  | 950.4730  | 475.7402  | 949.4890  | 475.2482  | 8  |
| 39 | 4165.8318 | 2083.4195 | 4148.8053 | 2074.9063 | 4147.8212 | 2074.4143 | P | 854.4155  | 427.7114  | 837.3890  | 419.1981  | 836.4050  | 418.7061  | 7  |
| 40 | 4312.9002 | 2156.9538 | 4295.8737 | 2148.4405 | 4294.8897 | 2147.9485 | F | 757.3628  | 379.1850  | 740.3362  | 370.6717  | 739.3522  | 370.1797  | 6  |
| 41 | 4413.9479 | 2207.4776 | 4396.9214 | 2198.9643 | 4395.9373 | 2198.4723 | T | 610.2944  | 305.6508  | 593.2678  | 297.1375  | 592.2838  | 296.6455  | 5  |
| 42 | 4577.0112 | 2289.0093 | 4559.9847 | 2280.4960 | 4559.0007 | 2280.0040 | Y | 509.2467  | 255.1270  | 492.2201  | 246.6137  |           |           | 4  |
| 43 | 4691.0542 | 2346.0307 | 4674.0276 | 2337.5174 | 4673.0436 | 2337.0254 | N | 346.1833  | 173.5953  | 329.1568  | 165.0820  |           |           | 3  |
| 44 | 4748.0756 | 2374.5415 | 4731.0491 | 2366.0282 | 4730.0651 | 2365.5362 | G | 232.1404  | 116.5738  | 215.1139  | 108.0606  |           |           | 2  |
| 45 |           |           |           |           |           |           | R | 175.1190  | 88.0631   | 158.0924  | 79.5498   |           |           | 1  |

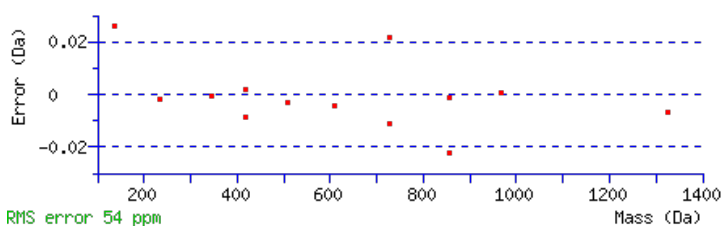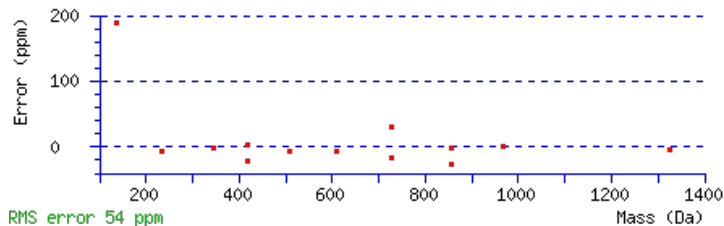

NCBI BLAST search of [TQGNKQMLCTCLGNGVSCQETA V TQTYGGNSNGEPCVLPFTYNGR](#)

(Parameters: blastp, nr protein database, expect=20000, no filter, PAM30)

Other BLAST [web gateways](#)

All matches to this query

| Score | Mr(calc)  | Delta  | Sequence                                                        | Site Analysis         |
|-------|-----------|--------|-----------------------------------------------------------------|-----------------------|
| 36.0  | 4985.1783 | 2.0216 | <a href="#">TQGNKQMLCTCLGNGVSCQETA V TQTYGGNSNGEPCVLPFTYNGR</a> | Deamidated Q2 18.92%  |
| 33.9  | 4985.1783 | 2.0216 | <a href="#">TQGNKQMLCTCLGNGVSCQETA V TQTYGGNSNGEPCVLPFTYNGR</a> | Deamidated N32 11.58% |
| 33.9  | 4985.1783 | 2.0216 | <a href="#">TQGNKQMLCTCLGNGVSCQETA V TQTYGGNSNGEPCVLPFTYNGR</a> | Deamidated N30 11.58% |
| 33.9  | 4985.1783 | 2.0216 | <a href="#">TQGNKQMLCTCLGNGVSCQETA V TQTYGGNSNGEPCVLPFTYNGR</a> | Deamidated Q25 11.58% |
| 33.9  | 4985.1783 | 2.0216 | <a href="#">TQGNKQMLCTCLGNGVSCQETA V TQTYGGNSNGEPCVLPFTYNGR</a> | Deamidated Q19 11.58% |
| 33.9  | 4985.1783 | 2.0216 | <a href="#">TQGNKQMLCTCLGNGVSCQETA V TQTYGGNSNGEPCVLPFTYNGR</a> | Deamidated N14 11.58% |
| 33.9  | 4985.1783 | 2.0216 | <a href="#">TQGNKQMLCTCLGNGVSCQETA V TQTYGGNSNGEPCVLPFTYNGR</a> | Deamidated Q6 11.58%  |
| 33.9  | 4985.1783 | 2.0216 | <a href="#">TQGNKQMLCTCLGNGVSCQETA V TQTYGGNSNGEPCVLPFTYNGR</a> | Deamidated N4 11.58%  |
| 0.9   | 4985.1955 | 2.0044 | <a href="#">HQQITENPOLMQNMLSAPYMRSMQSLSQNPDLAAQLQEQMR</a>       |                       |

|     |           |        |                                                             |  |
|-----|-----------|--------|-------------------------------------------------------------|--|
| 0.9 | 4986.1795 | 1.0204 | <a href="#">HQQITENPQLMQNMLSAPYMRSMMSQSLSQNPDLAAQLQEQMR</a> |  |
|-----|-----------|--------|-------------------------------------------------------------|--|

|                                                                                          |
|------------------------------------------------------------------------------------------|
| <b>Mascot:</b> <a href="http://www.matrixscience.com/">http://www.matrixscience.com/</a> |
|------------------------------------------------------------------------------------------|

# Mascot Search Results

## Peptide View

MS/MS Fragmentation of **TQGNKQMLCTCLGNGVSCQETAVTQTYGGNSNGEPCVLPFTYNGR**  
 Found in **P02751** in **uni\_human\_nr**, FINC\_HUMAN Fibronectin OS=Homo sapiens GN=FN1 PE=1 SV=4

Match to Query 20002: 4987.199896 from(1247.807250,4+) intensity(1689172.8750) rtinseconds(2692) scans(16187) index(12672)  
 Title: 130806\_HPL\_Human\_Plaque\_BR2\_TR2\_06\_Spectrum034477\_scans\_\_16187\_RTINSECONDS=2692  
 Data file E:\\RAW\\HumanPlaques\\imgf\\T\\1D\\T130806\_HPL\_Human\_Plaque\_BR2\_TR2\_06.mgf

Click mouse within plot area to zoom in by factor of two about that point

Or,  to  Da  
 Label all possible matches  Label matches used for scoring  
 Show Y-axis

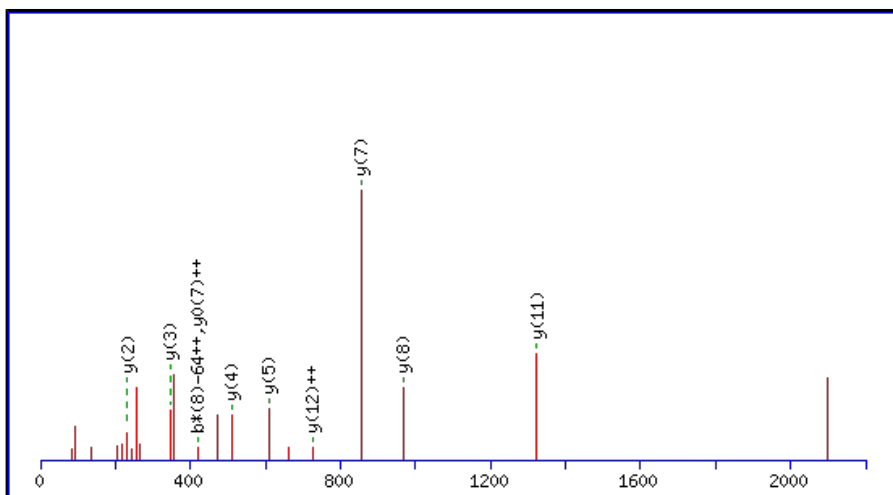

Monoisotopic mass of neutral peptide **Mr(calc):** 4985.1783  
**Fixed modifications:** Carbamidomethyl (C) (apply to specified residues or termini only)  
**Variable modifications:**  
**M7** : Oxidation (M), with neutral losses 0.0000(shown in table), 63.9983  
**N32** : Deamidated (NQ)  
**Ions Score:** 34 **Expect:** 0.009  
**Matches :** 10/782 fragment ions using 19 most intense peaks ([help](#))

| #  | b         | b <sup>++</sup> | b <sup>*</sup> | b <sup>***</sup> | b <sup>0</sup> | b <sup>0++</sup> | Seq. | y         | y <sup>++</sup> | y <sup>*</sup> | y <sup>***</sup> | y <sup>0</sup> | y <sup>0++</sup> | #  |
|----|-----------|-----------------|----------------|------------------|----------------|------------------|------|-----------|-----------------|----------------|------------------|----------------|------------------|----|
| 1  | 102.0550  | 51.5311         |                |                  | 84.0444        | 42.5258          | T    |           |                 |                |                  |                |                  | 45 |
| 2  | 230.1135  | 115.5604        | 213.0870       | 107.0471         | 212.1030       | 106.5551         | Q    | 4885.1379 | 2443.0726       | 4868.1114      | 2434.5593        | 4867.1273      | 2434.0673        | 44 |
| 3  | 287.1350  | 144.0711        | 270.1084       | 135.5579         | 269.1244       | 135.0659         | G    | 4757.0793 | 2379.0433       | 4740.0528      | 2370.5300        | 4739.0688      | 2370.0380        | 43 |
| 4  | 401.1779  | 201.0926        | 384.1514       | 192.5793         | 383.1674       | 192.0873         | N    | 4700.0579 | 2350.5326       | 4683.0313      | 2342.0193        | 4682.0473      | 2341.5273        | 42 |
| 5  | 529.2729  | 265.1401        | 512.2463       | 256.6268         | 511.2623       | 256.1348         | K    | 4586.0149 | 2293.5111       | 4568.9884      | 2284.9978        | 4568.0044      | 2284.5058        | 41 |
| 6  | 657.3315  | 329.1694        | 640.3049       | 320.6561         | 639.3209       | 320.1641         | Q    | 4457.9200 | 2229.4636       | 4440.8934      | 2220.9504        | 4439.9094      | 2220.4583        | 40 |
| 7  | 804.3669  | 402.6871        | 787.3403       | 394.1738         | 786.3563       | 393.6818         | M    | 4329.8614 | 2165.4343       | 4312.8348      | 2156.9211        | 4311.8508      | 2156.4291        | 39 |
| 8  | 917.4509  | 459.2291        | 900.4244       | 450.7158         | 899.4404       | 450.2238         | L    | 4182.8260 | 2091.9166       | 4165.7994      | 2083.4034        | 4164.8154      | 2082.9114        | 38 |
| 9  | 1077.4816 | 539.2444        | 1060.4550      | 530.7312         | 1059.4710      | 530.2391         | C    | 4069.7419 | 2035.3746       | 4052.7154      | 2026.8613        | 4051.7314      | 2026.3693        | 37 |
| 10 | 1178.5293 | 589.7683        | 1161.5027      | 581.2550         | 1160.5187      | 580.7630         | T    | 3909.7113 | 1955.3593       | 3892.6847      | 1946.8460        | 3891.7007      | 1946.3540        | 36 |
| 11 | 1338.5599 | 669.7836        | 1321.5334      | 661.2703         | 1320.5493      | 660.7783         | C    | 3808.6636 | 1904.8354       | 3791.6371      | 1896.3222        | 3790.6530      | 1895.8302        | 35 |
| 12 | 1451.6440 | 726.3256        | 1434.6174      | 717.8123         | 1433.6334      | 717.3203         | L    | 3648.6330 | 1824.8201       | 3631.6064      | 1816.3068        | 3630.6224      | 1815.8148        | 34 |
| 13 | 1508.6654 | 754.8364        | 1491.6389      | 746.3231         | 1490.6549      | 745.8311         | G    | 3535.5489 | 1768.2781       | 3518.5223      | 1759.7648        | 3517.5383      | 1759.2728        | 33 |
| 14 | 1622.7084 | 811.8578        | 1605.6818      | 803.3445         | 1604.6978      | 802.8525         | N    | 3478.5274 | 1739.7674       | 3461.5009      | 1731.2541        | 3460.5169      | 1730.7621        | 32 |
| 15 | 1679.7298 | 840.3686        | 1662.7033      | 831.8553         | 1661.7193      | 831.3633         | G    | 3364.4845 | 1682.7459       | 3347.4580      | 1674.2326        | 3346.4739      | 1673.7406        | 31 |
| 16 | 1778.7982 | 889.9028        | 1761.7717      | 881.3895         | 1760.7877      | 880.8975         | V    | 3307.4630 | 1654.2352       | 3290.4365      | 1645.7219        | 3289.4525      | 1645.2299        | 30 |
| 17 | 1865.8303 | 933.4188        | 1848.8037      | 924.9055         | 1847.8197      | 924.4135         | S    | 3208.3946 | 1604.7009       | 3191.3681      | 1596.1877        | 3190.3841      | 1595.6957        | 29 |

|    |           |           |           |           |           |           |   |           |           |           |           |           |           |    |
|----|-----------|-----------|-----------|-----------|-----------|-----------|---|-----------|-----------|-----------|-----------|-----------|-----------|----|
| 18 | 2025.8609 | 1013.4341 | 2008.8344 | 1004.9208 | 2007.8504 | 1004.4288 | C | 3121.3626 | 1561.1849 | 3104.3360 | 1552.6717 | 3103.3520 | 1552.1797 | 28 |
| 19 | 2153.9195 | 1077.4634 | 2136.8929 | 1068.9501 | 2135.9089 | 1068.4581 | Q | 2961.3319 | 1481.1696 | 2944.3054 | 1472.6563 | 2943.3214 | 1472.1643 | 27 |
| 20 | 2282.9621 | 1141.9847 | 2265.9355 | 1133.4714 | 2264.9515 | 1132.9794 | E | 2833.2734 | 1417.1403 | 2816.2468 | 1408.6270 | 2815.2628 | 1408.1350 | 26 |
| 21 | 2384.0098 | 1192.5085 | 2366.9832 | 1183.9952 | 2365.9992 | 1183.5032 | T | 2704.2308 | 1352.6190 | 2687.2042 | 1344.1058 | 2686.2202 | 1343.6137 | 25 |
| 22 | 2455.0469 | 1228.0271 | 2438.0203 | 1219.5138 | 2437.0363 | 1219.0218 | A | 2603.1831 | 1302.0952 | 2586.1565 | 1293.5819 | 2585.1725 | 1293.0899 | 24 |
| 23 | 2554.1153 | 1277.5613 | 2537.0887 | 1269.0480 | 2536.1047 | 1268.5560 | V | 2532.1460 | 1266.5766 | 2515.1194 | 1258.0634 | 2514.1354 | 1257.5713 | 23 |
| 24 | 2655.1630 | 1328.0851 | 2638.1364 | 1319.5718 | 2637.1524 | 1319.0798 | T | 2433.0776 | 1217.0424 | 2416.0510 | 1208.5291 | 2415.0670 | 1208.0371 | 22 |
| 25 | 2783.2216 | 1392.1144 | 2766.1950 | 1383.6011 | 2765.2110 | 1383.1091 | Q | 2332.0299 | 1166.5186 | 2315.0033 | 1158.0053 | 2314.0193 | 1157.5133 | 21 |
| 26 | 2884.2692 | 1442.6383 | 2867.2427 | 1434.1250 | 2866.2587 | 1433.6330 | T | 2203.9713 | 1102.4893 | 2186.9448 | 1093.9760 | 2185.9607 | 1093.4840 | 20 |
| 27 | 3047.3326 | 1524.1699 | 3030.3060 | 1515.6566 | 3029.3220 | 1515.1646 | Y | 2102.9236 | 1051.9655 | 2085.8971 | 1043.4522 | 2084.9131 | 1042.9602 | 19 |
| 28 | 3104.3540 | 1552.6806 | 3087.3275 | 1544.1674 | 3086.3435 | 1543.6754 | G | 1939.8603 | 970.4338  | 1922.8338 | 961.9205  | 1921.8497 | 961.4285  | 18 |
| 29 | 3161.3755 | 1581.1914 | 3144.3489 | 1572.6781 | 3143.3649 | 1572.1861 | G | 1882.8388 | 941.9231  | 1865.8123 | 933.4098  | 1864.8283 | 932.9178  | 17 |
| 30 | 3275.4184 | 1638.2128 | 3258.3919 | 1629.6996 | 3257.4078 | 1629.2076 | N | 1825.8174 | 913.4123  | 1808.7908 | 904.8991  | 1807.8068 | 904.4070  | 16 |
| 31 | 3362.4504 | 1681.7289 | 3345.4239 | 1673.2156 | 3344.4399 | 1672.7236 | S | 1711.7744 | 856.3909  | 1694.7479 | 847.8776  | 1693.7639 | 847.3856  | 15 |
| 32 | 3477.4774 | 1739.2423 | 3460.4508 | 1730.7291 | 3459.4668 | 1730.2370 | N | 1624.7424 | 812.8748  | 1607.7159 | 804.3616  | 1606.7319 | 803.8696  | 14 |
| 33 | 3534.4988 | 1767.7531 | 3517.4723 | 1759.2398 | 3516.4883 | 1758.7478 | G | 1509.7155 | 755.3614  | 1492.6889 | 746.8481  | 1491.7049 | 746.3561  | 13 |
| 34 | 3663.5414 | 1832.2744 | 3646.5149 | 1823.7611 | 3645.5309 | 1823.2691 | E | 1452.6940 | 726.8506  | 1435.6675 | 718.3374  | 1434.6834 | 717.8454  | 12 |
| 35 | 3760.5942 | 1880.8007 | 3743.5677 | 1872.2875 | 3742.5836 | 1871.7955 | P | 1323.6514 | 662.3293  | 1306.6249 | 653.8161  | 1305.6409 | 653.3241  | 11 |
| 36 | 3920.6249 | 1960.8161 | 3903.5983 | 1952.3028 | 3902.6143 | 1951.8108 | C | 1226.5987 | 613.8030  | 1209.5721 | 605.2897  | 1208.5881 | 604.7977  | 10 |
| 37 | 4019.6933 | 2010.3503 | 4002.6667 | 2001.8370 | 4001.6827 | 2001.3450 | V | 1066.5680 | 533.7876  | 1049.5415 | 525.2744  | 1048.5574 | 524.7824  | 9  |
| 38 | 4132.7773 | 2066.8923 | 4115.7508 | 2058.3790 | 4114.7668 | 2057.8870 | L | 967.4996  | 484.2534  | 950.4730  | 475.7402  | 949.4890  | 475.2482  | 8  |
| 39 | 4229.8301 | 2115.4187 | 4212.8035 | 2106.9054 | 4211.8195 | 2106.4134 | P | 854.4155  | 427.7114  | 837.3890  | 419.1981  | 836.4050  | 418.7061  | 7  |
| 40 | 4376.8985 | 2188.9529 | 4359.8720 | 2180.4396 | 4358.8879 | 2179.9476 | F | 757.3628  | 379.1850  | 740.3362  | 370.6717  | 739.3522  | 370.1797  | 6  |
| 41 | 4477.9462 | 2239.4767 | 4460.9196 | 2230.9635 | 4459.9356 | 2230.4715 | T | 610.2944  | 305.6508  | 593.2678  | 297.1375  | 592.2838  | 296.6455  | 5  |
| 42 | 4641.0095 | 2321.0084 | 4623.9830 | 2312.4951 | 4622.9990 | 2312.0031 | Y | 509.2467  | 255.1270  | 492.2201  | 246.6137  |           |           | 4  |
| 43 | 4755.0524 | 2378.0299 | 4738.0259 | 2369.5166 | 4737.0419 | 2369.0246 | N | 346.1833  | 173.5953  | 329.1568  | 165.0820  |           |           | 3  |
| 44 | 4812.0739 | 2406.5406 | 4795.0474 | 2398.0273 | 4794.0633 | 2397.5353 | G | 232.1404  | 116.5738  | 215.1139  | 108.0606  |           |           | 2  |
| 45 |           |           |           |           |           |           | R | 175.1190  | 88.0631   | 158.0924  | 79.5498   |           |           | 1  |

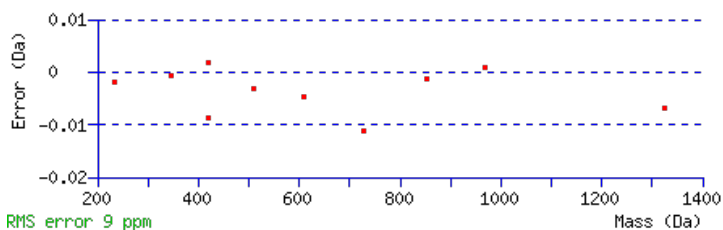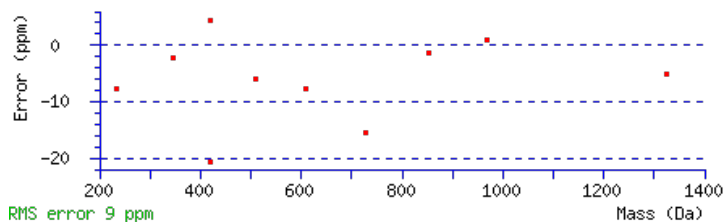

NCBI BLAST search of [TQGNKQMLCTCLGNGVSCQETA V TQTYGGNSNGEPCVLPFTYNGR](#)

(Parameters: blastp, nr protein database, expect=20000, no filter, PAM30)

Other BLAST [web gateways](#)

All matches to this query

| Score | Mr(calc)  | Delta  | Sequence                                                        | Site Analysis         |
|-------|-----------|--------|-----------------------------------------------------------------|-----------------------|
| 33.9  | 4985.1783 | 2.0216 | <a href="#">TQGNKQMLCTCLGNGVSCQETA V TQTYGGNSNGEPCVLPFTYNGR</a> | Deamidated N32 12.50% |
| 33.9  | 4985.1783 | 2.0216 | <a href="#">TQGNKQMLCTCLGNGVSCQETA V TQTYGGNSNGEPCVLPFTYNGR</a> | Deamidated N30 12.50% |
| 33.9  | 4985.1783 | 2.0216 | <a href="#">TQGNKQMLCTCLGNGVSCQETA V TQTYGGNSNGEPCVLPFTYNGR</a> | Deamidated Q25 12.50% |
| 33.9  | 4985.1783 | 2.0216 | <a href="#">TQGNKQMLCTCLGNGVSCQETA V TQTYGGNSNGEPCVLPFTYNGR</a> | Deamidated Q19 12.50% |
| 33.9  | 4985.1783 | 2.0216 | <a href="#">TQGNKQMLCTCLGNGVSCQETA V TQTYGGNSNGEPCVLPFTYNGR</a> | Deamidated N14 12.50% |
| 33.9  | 4985.1783 | 2.0216 | <a href="#">TQGNKQMLCTCLGNGVSCQETA V TQTYGGNSNGEPCVLPFTYNGR</a> | Deamidated Q6 12.50%  |
| 33.9  | 4985.1783 | 2.0216 | <a href="#">TQGNKQMLCTCLGNGVSCQETA V TQTYGGNSNGEPCVLPFTYNGR</a> | Deamidated N4 12.50%  |
| 33.9  | 4985.1783 | 2.0216 | <a href="#">TQGNKQMLCTCLGNGVSCQETA V TQTYGGNSNGEPCVLPFTYNGR</a> | Deamidated Q2 12.50%  |
| 0.9   | 4985.1955 | 2.0044 | <a href="#">HQQITENPQLMQNMLSAPYMRSMMSQSLSQNPDLAAQLQEQMR</a>     |                       |

|     |           |        |                                                           |  |
|-----|-----------|--------|-----------------------------------------------------------|--|
| 0.9 | 4986.1795 | 1.0204 | <a href="#">HQQITENPQLMQNMLSAPYMRSMMSLSQNPDLAAQLQEQMR</a> |  |
|-----|-----------|--------|-----------------------------------------------------------|--|

|                                                                                          |
|------------------------------------------------------------------------------------------|
| <b>Mascot:</b> <a href="http://www.matrixscience.com/">http://www.matrixscience.com/</a> |
|------------------------------------------------------------------------------------------|

# Mascot Search Results

## Peptide View

MS/MS Fragmentation of **TQGNKQMLCTCLGNGVSCQETAVTQTYGGNSNGEPCVLPFTYNGR**  
 Found in **P02751** in **uni\_human\_nr**, FINC\_HUMAN Fibronectin OS=Homo sapiens GN=FN1 PE=1 SV=4

Match to Query 19840: 4984.190656 from(1247.054940,4+) intensity(0.0000) rtinseconds(2672) scans(15844) index(12088)  
 Title: 130801\_HPL\_Human\_Plaque\_BR1\_TR1\_07\_Spectrum033791\_scans\_\_15844\_RTINSECONDS=2672  
 Data file E:\\RAW\\HumanPlaques\\imgf\\T\\1D\\T130801\_HPL\_Human\_Plaque\_BR1\_TR1\_07.mgf

Click mouse within plot area to zoom in by factor of two about that point

Or,  to  Da  
 Label all possible matches  Label matches used for scoring   
 Show Y-axis

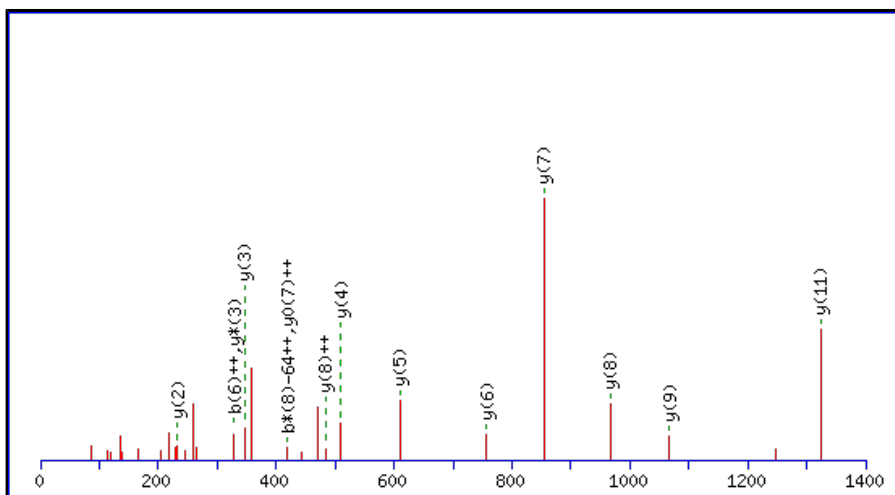

Monoisotopic mass of neutral peptide **Mr(calc):** 4984.1943  
**Fixed modifications:** Carbamidomethyl (C) (apply to specified residues or termini only)  
**Variable modifications:**  
 M7 : Oxidation (M), with neutral losses 0.0000(shown in table), 63.9983  
**Ions Score:** 47 **Expect:** 0.00051  
**Matches :** 14/782 fragment ions using 22 most intense peaks ([help](#))

| #  | b         | b <sup>++</sup> | b <sup>*</sup> | b <sup>*++</sup> | b <sup>0</sup> | b <sup>0++</sup> | Seq. | y         | y <sup>++</sup> | y <sup>*</sup> | y <sup>*++</sup> | y <sup>0</sup> | y <sup>0++</sup> | #  |
|----|-----------|-----------------|----------------|------------------|----------------|------------------|------|-----------|-----------------|----------------|------------------|----------------|------------------|----|
| 1  | 102.0550  | 51.5311         |                |                  | 84.0444        | 42.5258          | T    |           |                 |                |                  |                |                  | 45 |
| 2  | 230.1135  | 115.5604        | 213.0870       | 107.0471         | 212.1030       | 106.5551         | Q    | 4884.1539 | 2442.5806       | 4867.1273      | 2434.0673        | 4866.1433      | 2433.5753        | 44 |
| 3  | 287.1350  | 144.0711        | 270.1084       | 135.5579         | 269.1244       | 135.0659         | G    | 4756.0953 | 2378.5513       | 4739.0688      | 2370.0380        | 4738.0847      | 2369.5460        | 43 |
| 4  | 401.1779  | 201.0926        | 384.1514       | 192.5793         | 383.1674       | 192.0873         | N    | 4699.0738 | 2350.0406       | 4682.0473      | 2341.5273        | 4681.0633      | 2341.0353        | 42 |
| 5  | 529.2729  | 265.1401        | 512.2463       | 256.6268         | 511.2623       | 256.1348         | K    | 4585.0309 | 2293.0191       | 4568.0044      | 2284.5058        | 4567.0204      | 2284.0138        | 41 |
| 6  | 657.3315  | <b>329.1694</b> | 640.3049       | 320.6561         | 639.3209       | 320.1641         | Q    | 4456.9360 | 2228.9716       | 4439.9094      | 2220.4583        | 4438.9254      | 2219.9663        | 40 |
| 7  | 804.3669  | 402.6871        | 787.3403       | 394.1738         | 786.3563       | 393.6818         | M    | 4328.8774 | 2164.9423       | 4311.8508      | 2156.4291        | 4310.8668      | 2155.9370        | 39 |
| 8  | 917.4509  | 459.2291        | 900.4244       | 450.7158         | 899.4404       | 450.2238         | L    | 4181.8420 | 2091.4246       | 4164.8154      | 2082.9114        | 4163.8314      | 2082.4193        | 38 |
| 9  | 1077.4816 | 539.2444        | 1060.4550      | 530.7312         | 1059.4710      | 530.2391         | C    | 4068.7579 | 2034.8826       | 4051.7314      | 2026.3693        | 4050.7474      | 2025.8773        | 37 |
| 10 | 1178.5293 | 589.7683        | 1161.5027      | 581.2550         | 1160.5187      | 580.7630         | T    | 3908.7273 | 1954.8673       | 3891.7007      | 1946.3540        | 3890.7167      | 1945.8620        | 36 |
| 11 | 1338.5599 | 669.7836        | 1321.5334      | 661.2703         | 1320.5493      | 660.7783         | C    | 3807.6796 | 1904.3434       | 3790.6530      | 1895.8302        | 3789.6690      | 1895.3381        | 35 |
| 12 | 1451.6440 | 726.3256        | 1434.6174      | 717.8123         | 1433.6334      | 717.3203         | L    | 3647.6489 | 1824.3281       | 3630.6224      | 1815.8148        | 3629.6384      | 1815.3228        | 34 |
| 13 | 1508.6654 | 754.8364        | 1491.6389      | 746.3231         | 1490.6549      | 745.8311         | G    | 3534.5649 | 1767.7861       | 3517.5383      | 1759.2728        | 3516.5543      | 1758.7808        | 33 |
| 14 | 1622.7084 | 811.8578        | 1605.6818      | 803.3445         | 1604.6978      | 802.8525         | N    | 3477.5434 | 1739.2753       | 3460.5169      | 1730.7621        | 3459.5328      | 1730.2701        | 32 |
| 15 | 1679.7298 | 840.3686        | 1662.7033      | 831.8553         | 1661.7193      | 831.3633         | G    | 3363.5005 | 1682.2539       | 3346.4739      | 1673.7406        | 3345.4899      | 1673.2486        | 31 |
| 16 | 1778.7982 | 889.9028        | 1761.7717      | 881.3895         | 1760.7877      | 880.8975         | V    | 3306.4790 | 1653.7431       | 3289.4525      | 1645.2299        | 3288.4685      | 1644.7379        | 30 |
| 17 | 1865.8303 | 933.4188        | 1848.8037      | 924.9055         | 1847.8197      | 924.4135         | S    | 3207.4106 | 1604.2089       | 3190.3841      | 1595.6957        | 3189.4000      | 1595.2037        | 29 |
| 18 | 2025.8609 | 1013.4341       | 2008.8344      | 1004.9208        | 2007.8504      | 1004.4288        | C    | 3120.3786 | 1560.6929       | 3103.3520      | 1552.1797        | 3102.3680      | 1551.6876        | 28 |

|    |           |           |           |           |           |           |   |           |           |           |           |           |           |    |
|----|-----------|-----------|-----------|-----------|-----------|-----------|---|-----------|-----------|-----------|-----------|-----------|-----------|----|
| 19 | 2153.9195 | 1077.4634 | 2136.8929 | 1068.9501 | 2135.9089 | 1068.4581 | Q | 2960.3479 | 1480.6776 | 2943.3214 | 1472.1643 | 2942.3374 | 1471.6723 | 27 |
| 20 | 2282.9621 | 1141.9847 | 2265.9355 | 1133.4714 | 2264.9515 | 1132.9794 | E | 2832.2894 | 1416.6483 | 2815.2628 | 1408.1350 | 2814.2788 | 1407.6430 | 26 |
| 21 | 2384.0098 | 1192.5085 | 2366.9832 | 1183.9952 | 2365.9992 | 1183.5032 | T | 2703.2468 | 1352.1270 | 2686.2202 | 1343.6137 | 2685.2362 | 1343.1217 | 25 |
| 22 | 2455.0469 | 1228.0271 | 2438.0203 | 1219.5138 | 2437.0363 | 1219.0218 | A | 2602.1991 | 1301.6032 | 2585.1725 | 1293.0899 | 2584.1885 | 1292.5979 | 24 |
| 23 | 2554.1153 | 1277.5613 | 2537.0887 | 1269.0480 | 2536.1047 | 1268.5560 | V | 2531.1620 | 1266.0846 | 2514.1354 | 1257.5713 | 2513.1514 | 1257.0793 | 23 |
| 24 | 2655.1630 | 1328.0851 | 2638.1364 | 1319.5718 | 2637.1524 | 1319.0798 | T | 2432.0936 | 1216.5504 | 2415.0670 | 1208.0371 | 2414.0830 | 1207.5451 | 22 |
| 25 | 2783.2216 | 1392.1144 | 2766.1950 | 1383.6011 | 2765.2110 | 1383.1091 | Q | 2331.0459 | 1166.0266 | 2314.0193 | 1157.5133 | 2313.0353 | 1157.0213 | 21 |
| 26 | 2884.2692 | 1442.6383 | 2867.2427 | 1434.1250 | 2866.2587 | 1433.6330 | T | 2202.9873 | 1101.9973 | 2185.9607 | 1093.4840 | 2184.9767 | 1092.9920 | 20 |
| 27 | 3047.3326 | 1524.1699 | 3030.3060 | 1515.6566 | 3029.3220 | 1515.1646 | Y | 2101.9396 | 1051.4734 | 2084.9131 | 1042.9602 | 2083.9291 | 1042.4682 | 19 |
| 28 | 3104.3540 | 1552.6806 | 3087.3275 | 1544.1674 | 3086.3435 | 1543.6754 | G | 1938.8763 | 969.9418  | 1921.8497 | 961.4285  | 1920.8657 | 960.9365  | 18 |
| 29 | 3161.3755 | 1581.1914 | 3144.3489 | 1572.6781 | 3143.3649 | 1572.1861 | G | 1881.8548 | 941.4310  | 1864.8283 | 932.9178  | 1863.8443 | 932.4258  | 17 |
| 30 | 3275.4184 | 1638.2128 | 3258.3919 | 1629.6996 | 3257.4078 | 1629.2076 | N | 1824.8334 | 912.9203  | 1807.8068 | 904.4070  | 1806.8228 | 903.9150  | 16 |
| 31 | 3362.4504 | 1681.7289 | 3345.4239 | 1673.2156 | 3344.4399 | 1672.7236 | S | 1710.7904 | 855.8989  | 1693.7639 | 847.3856  | 1692.7799 | 846.8936  | 15 |
| 32 | 3476.4934 | 1738.7503 | 3459.4668 | 1730.2370 | 3458.4828 | 1729.7450 | N | 1623.7584 | 812.3828  | 1606.7319 | 803.8696  | 1605.7478 | 803.3776  | 14 |
| 33 | 3533.5148 | 1767.2611 | 3516.4883 | 1758.7478 | 3515.5043 | 1758.2558 | G | 1509.7155 | 755.3614  | 1492.6889 | 746.8481  | 1491.7049 | 746.3561  | 13 |
| 34 | 3662.5574 | 1831.7824 | 3645.5309 | 1823.2691 | 3644.5469 | 1822.7771 | E | 1452.6940 | 726.8506  | 1435.6675 | 718.3374  | 1434.6834 | 717.8454  | 12 |
| 35 | 3759.6102 | 1880.3087 | 3742.5836 | 1871.7955 | 3741.5996 | 1871.3035 | P | 1323.6514 | 662.3293  | 1306.6249 | 653.8161  | 1305.6409 | 653.3241  | 11 |
| 36 | 3919.6408 | 1960.3241 | 3902.6143 | 1951.8108 | 3901.6303 | 1951.3188 | C | 1226.5987 | 613.8030  | 1209.5721 | 605.2897  | 1208.5881 | 604.7977  | 10 |
| 37 | 4018.7093 | 2009.8583 | 4001.6827 | 2001.3450 | 4000.6987 | 2000.8530 | V | 1066.5680 | 533.7876  | 1049.5415 | 525.2744  | 1048.5574 | 524.7824  | 9  |
| 38 | 4131.7933 | 2066.4003 | 4114.7668 | 2057.8870 | 4113.7828 | 2057.3950 | L | 967.4996  | 484.2534  | 950.4730  | 475.7402  | 949.4890  | 475.2482  | 8  |
| 39 | 4228.8461 | 2114.9267 | 4211.8195 | 2106.4134 | 4210.8355 | 2105.9214 | P | 854.4155  | 427.7114  | 837.3890  | 419.1981  | 836.4050  | 418.7061  | 7  |
| 40 | 4375.9145 | 2188.4609 | 4358.8879 | 2179.9476 | 4357.9039 | 2179.4556 | F | 757.3628  | 379.1850  | 740.3362  | 370.6717  | 739.3522  | 370.1797  | 6  |
| 41 | 4476.9622 | 2238.9847 | 4459.9356 | 2230.4715 | 4458.9516 | 2229.9794 | T | 610.2944  | 305.6508  | 593.2678  | 297.1375  | 592.2838  | 296.6455  | 5  |
| 42 | 4640.0255 | 2320.5164 | 4622.9990 | 2312.0031 | 4622.0149 | 2311.5111 | Y | 509.2467  | 255.1270  | 492.2201  | 246.6137  |           |           | 4  |
| 43 | 4754.0684 | 2377.5379 | 4737.0419 | 2369.0246 | 4736.0579 | 2368.5326 | N | 346.1833  | 173.5953  | 329.1568  | 165.0820  |           |           | 3  |
| 44 | 4811.0899 | 2406.0486 | 4794.0633 | 2397.5353 | 4793.0793 | 2397.0433 | G | 232.1404  | 116.5738  | 215.1139  | 108.0606  |           |           | 2  |
| 45 |           |           |           |           |           |           | R | 175.1190  | 88.0631   | 158.0924  | 79.5498   |           |           | 1  |

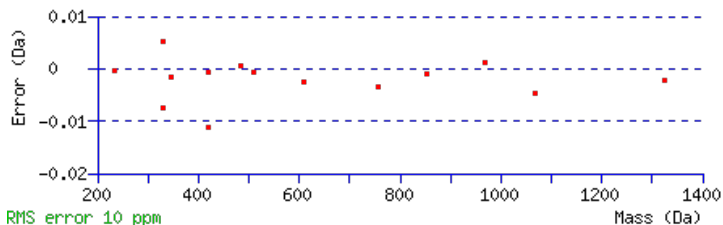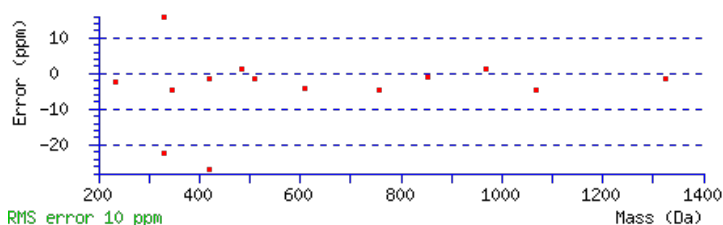

NCBI BLAST search of [TQGNKQMLCTCLGNGVSCQETA V TQTYGGNSNGEPCVLPFTYNGR](#)

(Parameters: blastp, nr protein database, expect=20000, no filter, PAM30)

Other BLAST [web gateways](#)

All matches to this query

| Score | Mr(calcd) | Delta   | Sequence                                                        |
|-------|-----------|---------|-----------------------------------------------------------------|
| 47.2  | 4984.1943 | -0.0037 | <a href="#">TQGNKQMLCTCLGNGVSCQETA V TQTYGGNSNGEPCVLPFTYNGR</a> |

Mascot: <http://www.matrixscience.com/>



# Mascot Search Results

## Peptide View

MS/MS Fragmentation of **TQGNKQMLCTCLGNGVSCQETAVTQTYGGNSNGEPCVLPFTYNGR**  
 Found in **P02751** in **uni\_human\_nr**, FINC\_HUMAN Fibronectin OS=Homo sapiens GN=FN1 PE=1 SV=4

Match to Query 19986: 4971.202336 from(1243.807860,4+) intensity(1117394.6250) rtinseconds(2778) scans(16785) index(13164)  
 Title: 130806\_HPL\_Human\_Plaque\_BR2\_TR2\_06\_Spectrum034969\_scans\_\_16785\_RTINSECONDS=2778  
 Data file E:\\RAW\\HumanPlaques\\imgf\\T\\1D\\T130806\_HPL\_Human\_Plaque\_BR2\_TR2\_06.mgf

Click mouse within plot area to zoom in by factor of two about that point

Or,  to  Da  
 Label all possible matches  Label matches used for scoring  
 Show Y-axis

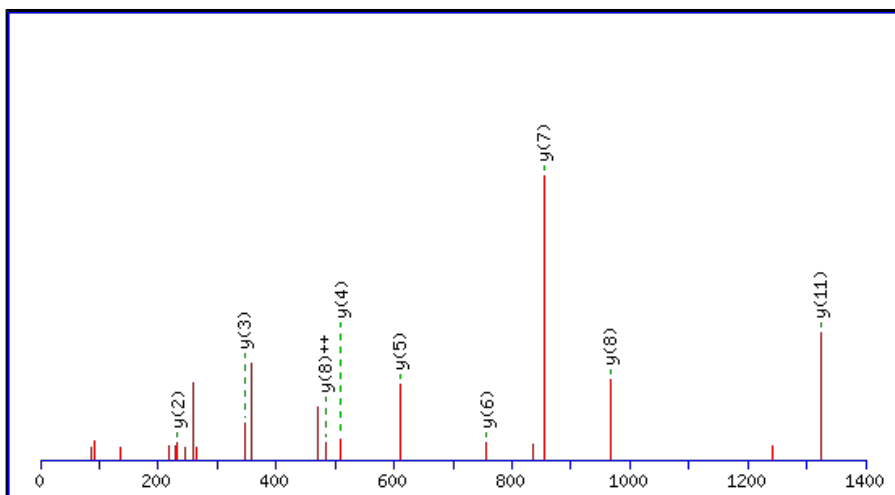

Monoisotopic mass of neutral peptide **Mr(calc): 4969.1834**  
**Fixed modifications:** Carbamidomethyl (C) (apply to specified residues or termini only)  
**Variable modifications:**  
 N32 : Deamidated (NQ)  
**Ions Score:** 43 **Expect:** 0.0012  
**Matches :** 9/518 fragment ions using 17 most intense peaks ([help](#))

| #  | b         | b <sup>++</sup> | b <sup>*</sup> | b <sup>***</sup> | b <sup>0</sup> | b <sup>0++</sup> | Seq. | y         | y <sup>++</sup> | y <sup>*</sup> | y <sup>***</sup> | y <sup>0</sup> | y <sup>0++</sup> | #  |
|----|-----------|-----------------|----------------|------------------|----------------|------------------|------|-----------|-----------------|----------------|------------------|----------------|------------------|----|
| 1  | 102.0550  | 51.5311         |                |                  | 84.0444        | 42.5258          | T    |           |                 |                |                  |                |                  | 45 |
| 2  | 230.1135  | 115.5604        | 213.0870       | 107.0471         | 212.1030       | 106.5551         | Q    | 4869.1430 | 2435.0751       | 4852.1164      | 2426.5619        | 4851.1324      | 2426.0699        | 44 |
| 3  | 287.1350  | 144.0711        | 270.1084       | 135.5579         | 269.1244       | 135.0659         | G    | 4741.0844 | 2371.0458       | 4724.0579      | 2362.5326        | 4723.0738      | 2362.0406        | 43 |
| 4  | 401.1779  | 201.0926        | 384.1514       | 192.5793         | 383.1674       | 192.0873         | N    | 4684.0630 | 2342.5351       | 4667.0364      | 2334.0218        | 4666.0524      | 2333.5298        | 42 |
| 5  | 529.2729  | 265.1401        | 512.2463       | 256.6268         | 511.2623       | 256.1348         | K    | 4570.0200 | 2285.5136       | 4552.9935      | 2277.0004        | 4552.0095      | 2276.5084        | 41 |
| 6  | 657.3315  | 329.1694        | 640.3049       | 320.6561         | 639.3209       | 320.1641         | Q    | 4441.9251 | 2221.4662       | 4424.8985      | 2212.9529        | 4423.9145      | 2212.4609        | 40 |
| 7  | 788.3720  | 394.6896        | 771.3454       | 386.1763         | 770.3614       | 385.6843         | M    | 4313.8665 | 2157.4369       | 4296.8399      | 2148.9236        | 4295.8559      | 2148.4316        | 39 |
| 8  | 901.4560  | 451.2316        | 884.4295       | 442.7184         | 883.4454       | 442.2264         | L    | 4182.8260 | 2091.9166       | 4165.7994      | 2083.4034        | 4164.8154      | 2082.9114        | 38 |
| 9  | 1061.4867 | 531.2470        | 1044.4601      | 522.7337         | 1043.4761      | 522.2417         | C    | 4069.7419 | 2035.3746       | 4052.7154      | 2026.8613        | 4051.7314      | 2026.3693        | 37 |
| 10 | 1162.5343 | 581.7708        | 1145.5078      | 573.2575         | 1144.5238      | 572.7655         | T    | 3909.7113 | 1955.3593       | 3892.6847      | 1946.8460        | 3891.7007      | 1946.3540        | 36 |
| 11 | 1322.5650 | 661.7861        | 1305.5384      | 653.2729         | 1304.5544      | 652.7809         | C    | 3808.6636 | 1904.8354       | 3791.6371      | 1896.3222        | 3790.6530      | 1895.8302        | 35 |
| 12 | 1435.6491 | 718.3282        | 1418.6225      | 709.8149         | 1417.6385      | 709.3229         | L    | 3648.6330 | 1824.8201       | 3631.6064      | 1816.3068        | 3630.6224      | 1815.8148        | 34 |
| 13 | 1492.6705 | 746.8389        | 1475.6440      | 738.3256         | 1474.6600      | 737.8336         | G    | 3535.5489 | 1768.2781       | 3518.5223      | 1759.7648        | 3517.5383      | 1759.2728        | 33 |
| 14 | 1606.7134 | 803.8604        | 1589.6869      | 795.3471         | 1588.7029      | 794.8551         | N    | 3478.5274 | 1739.7674       | 3461.5009      | 1731.2541        | 3460.5169      | 1730.7621        | 32 |
| 15 | 1663.7349 | 832.3711        | 1646.7084      | 823.8578         | 1645.7243      | 823.3658         | G    | 3364.4845 | 1682.7459       | 3347.4580      | 1674.2326        | 3346.4739      | 1673.7406        | 31 |
| 16 | 1762.8033 | 881.9053        | 1745.7768      | 873.3920         | 1744.7928      | 872.9000         | V    | 3307.4630 | 1654.2352       | 3290.4365      | 1645.7219        | 3289.4525      | 1645.2299        | 30 |
| 17 | 1849.8354 | 925.4213        | 1832.8088      | 916.9080         | 1831.8248      | 916.4160         | S    | 3208.3946 | 1604.7009       | 3191.3681      | 1596.1877        | 3190.3841      | 1595.6957        | 29 |
| 18 | 2009.8660 | 1005.4366       | 1992.8395      | 996.9234         | 1991.8554      | 996.4314         | C    | 3121.3626 | 1561.1849       | 3104.3360      | 1552.6717        | 3103.3520      | 1552.1797        | 28 |

|    |           |           |           |           |           |           |   |                  |                 |           |           |           |           |    |
|----|-----------|-----------|-----------|-----------|-----------|-----------|---|------------------|-----------------|-----------|-----------|-----------|-----------|----|
| 19 | 2137.9246 | 1069.4659 | 2120.8980 | 1060.9527 | 2119.9140 | 1060.4606 | Q | 2961.3319        | 1481.1696       | 2944.3054 | 1472.6563 | 2943.3214 | 1472.1643 | 27 |
| 20 | 2266.9672 | 1133.9872 | 2249.9406 | 1125.4739 | 2248.9566 | 1124.9819 | E | 2833.2734        | 1417.1403       | 2816.2468 | 1408.6270 | 2815.2628 | 1408.1350 | 26 |
| 21 | 2368.0149 | 1184.5111 | 2350.9883 | 1175.9978 | 2350.0043 | 1175.5058 | T | 2704.2308        | 1352.6190       | 2687.2042 | 1344.1058 | 2686.2202 | 1343.6137 | 25 |
| 22 | 2439.0520 | 1220.0296 | 2422.0254 | 1211.5163 | 2421.0414 | 1211.0243 | A | 2603.1831        | 1302.0952       | 2586.1565 | 1293.5819 | 2585.1725 | 1293.0899 | 24 |
| 23 | 2538.1204 | 1269.5638 | 2521.0938 | 1261.0506 | 2520.1098 | 1260.5585 | V | 2532.1460        | 1266.5766       | 2515.1194 | 1258.0634 | 2514.1354 | 1257.5713 | 23 |
| 24 | 2639.1681 | 1320.0877 | 2622.1415 | 1311.5744 | 2621.1575 | 1311.0824 | T | 2433.0776        | 1217.0424       | 2416.0510 | 1208.5291 | 2415.0670 | 1208.0371 | 22 |
| 25 | 2767.2266 | 1384.1170 | 2750.2001 | 1375.6037 | 2749.2161 | 1375.1117 | Q | 2332.0299        | 1166.5186       | 2315.0033 | 1158.0053 | 2314.0193 | 1157.5133 | 21 |
| 26 | 2868.2743 | 1434.6408 | 2851.2478 | 1426.1275 | 2850.2637 | 1425.6355 | T | 2203.9713        | 1102.4893       | 2186.9448 | 1093.9760 | 2185.9607 | 1093.4840 | 20 |
| 27 | 3031.3376 | 1516.1725 | 3014.3111 | 1507.6592 | 3013.3271 | 1507.1672 | Y | 2102.9236        | 1051.9655       | 2085.8971 | 1043.4522 | 2084.9131 | 1042.9602 | 19 |
| 28 | 3088.3591 | 1544.6832 | 3071.3326 | 1536.1699 | 3070.3485 | 1535.6779 | G | 1939.8603        | 970.4338        | 1922.8338 | 961.9205  | 1921.8497 | 961.4285  | 18 |
| 29 | 3145.3806 | 1573.1939 | 3128.3540 | 1564.6806 | 3127.3700 | 1564.1886 | G | 1882.8388        | 941.9231        | 1865.8123 | 933.4098  | 1864.8283 | 932.9178  | 17 |
| 30 | 3259.4235 | 1630.2154 | 3242.3969 | 1621.7021 | 3241.4129 | 1621.2101 | N | 1825.8174        | 913.4123        | 1808.7908 | 904.8991  | 1807.8068 | 904.4070  | 16 |
| 31 | 3346.4555 | 1673.7314 | 3329.4290 | 1665.2181 | 3328.4450 | 1664.7261 | S | 1711.7744        | 856.3909        | 1694.7479 | 847.8776  | 1693.7639 | 847.3856  | 15 |
| 32 | 3461.4825 | 1731.2449 | 3444.4559 | 1722.7316 | 3443.4719 | 1722.2396 | N | 1624.7424        | 812.8748        | 1607.7159 | 804.3616  | 1606.7319 | 803.8696  | 14 |
| 33 | 3518.5039 | 1759.7556 | 3501.4774 | 1751.2423 | 3500.4934 | 1750.7503 | G | 1509.7155        | 755.3614        | 1492.6889 | 746.8481  | 1491.7049 | 746.3561  | 13 |
| 34 | 3647.5465 | 1824.2769 | 3630.5200 | 1815.7636 | 3629.5360 | 1815.2716 | E | 1452.6940        | 726.8506        | 1435.6675 | 718.3374  | 1434.6834 | 717.8454  | 12 |
| 35 | 3744.5993 | 1872.8033 | 3727.5727 | 1864.2900 | 3726.5887 | 1863.7980 | P | <b>1323.6514</b> | 662.3293        | 1306.6249 | 653.8161  | 1305.6409 | 653.3241  | 11 |
| 36 | 3904.6299 | 1952.8186 | 3887.6034 | 1944.3053 | 3886.6194 | 1943.8133 | C | 1226.5987        | 613.8030        | 1209.5721 | 605.2897  | 1208.5881 | 604.7977  | 10 |
| 37 | 4003.6984 | 2002.3528 | 3986.6718 | 1993.8395 | 3985.6878 | 1993.3475 | V | 1066.5680        | 533.7876        | 1049.5415 | 525.2744  | 1048.5574 | 524.7824  | 9  |
| 38 | 4116.7824 | 2058.8948 | 4099.7559 | 2050.3816 | 4098.7719 | 2049.8896 | L | <b>967.4996</b>  | <b>484.2534</b> | 950.4730  | 475.7402  | 949.4890  | 475.2482  | 8  |
| 39 | 4213.8352 | 2107.4212 | 4196.8086 | 2098.9080 | 4195.8246 | 2098.4159 | P | <b>854.4155</b>  | 427.7114        | 837.3890  | 419.1981  | 836.4050  | 418.7061  | 7  |
| 40 | 4360.9036 | 2180.9554 | 4343.8770 | 2172.4422 | 4342.8930 | 2171.9502 | F | <b>757.3628</b>  | 379.1850        | 740.3362  | 370.6717  | 739.3522  | 370.1797  | 6  |
| 41 | 4461.9513 | 2231.4793 | 4444.9247 | 2222.9660 | 4443.9407 | 2222.4740 | T | <b>610.2944</b>  | 305.6508        | 593.2678  | 297.1375  | 592.2838  | 296.6455  | 5  |
| 42 | 4625.0146 | 2313.0109 | 4607.9881 | 2304.4977 | 4607.0040 | 2304.0057 | Y | <b>509.2467</b>  | 255.1270        | 492.2201  | 246.6137  |           |           | 4  |
| 43 | 4739.0575 | 2370.0324 | 4722.0310 | 2361.5191 | 4721.0470 | 2361.0271 | N | <b>346.1833</b>  | 173.5953        | 329.1568  | 165.0820  |           |           | 3  |
| 44 | 4796.0790 | 2398.5431 | 4779.0524 | 2390.0299 | 4778.0684 | 2389.5379 | G | <b>232.1404</b>  | 116.5738        | 215.1139  | 108.0606  |           |           | 2  |
| 45 |           |           |           |           |           |           | R | 175.1190         | 88.0631         | 158.0924  | 79.5498   |           |           | 1  |

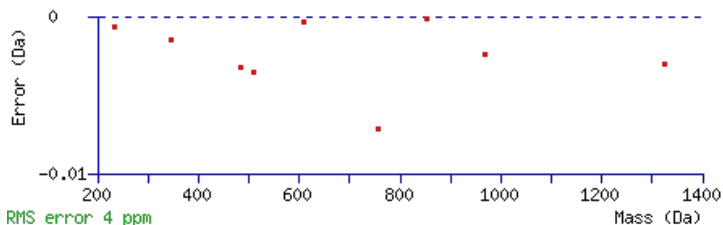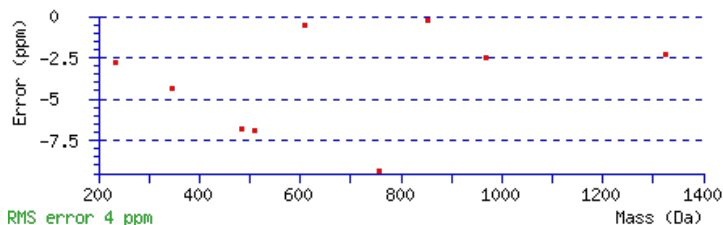

NCBI BLAST search of [TQGNKQMLCTCLGNGVSCQETAVTQTYGGNSNGEPCVLPFTYNGR](#)

(Parameters: blastp, nr protein database, expect=20000, no filter, PAM30)

Other BLAST [web gateways](#)

All matches to this query

| Score | Mr(calcd) | Delta  | Sequence                                                      | Site Analysis         |
|-------|-----------|--------|---------------------------------------------------------------|-----------------------|
| 43.0  | 4969.1834 | 2.0189 | <a href="#">TQGNKQMLCTCLGNGVSCQETAVTQTYGGNSNGEPCVLPFTYNGR</a> | Deamidated N32 12.50% |
| 43.0  | 4969.1834 | 2.0189 | <a href="#">TQGNKQMLCTCLGNGVSCQETAVTQTYGGNSNGEPCVLPFTYNGR</a> | Deamidated N30 12.50% |
| 43.0  | 4969.1834 | 2.0189 | <a href="#">TQGNKQMLCTCLGNGVSCQETAVTQTYGGNSNGEPCVLPFTYNGR</a> | Deamidated Q25 12.50% |
| 43.0  | 4969.1834 | 2.0189 | <a href="#">TQGNKQMLCTCLGNGVSCQETAVTQTYGGNSNGEPCVLPFTYNGR</a> | Deamidated Q19 12.50% |
| 43.0  | 4969.1834 | 2.0189 | <a href="#">TQGNKQMLCTCLGNGVSCQETAVTQTYGGNSNGEPCVLPFTYNGR</a> | Deamidated N14 12.50% |
| 43.0  | 4969.1834 | 2.0189 | <a href="#">TQGNKQMLCTCLGNGVSCQETAVTQTYGGNSNGEPCVLPFTYNGR</a> | Deamidated Q6 12.50%  |
| 43.0  | 4969.1834 | 2.0189 | <a href="#">TQGNKQMLCTCLGNGVSCQETAVTQTYGGNSNGEPCVLPFTYNGR</a> | Deamidated N4 12.50%  |
| 43.0  | 4969.1834 | 2.0189 | <a href="#">TQGNKQMLCTCLGNGVSCQETAVTQTYGGNSNGEPCVLPFTYNGR</a> | Deamidated Q2 12.50%  |
| 1.0   | 4970.1993 | 1.0031 | <a href="#">YDFAIMIPPGGTECFWQFAHQTYFYFSYEVQRTVGMSHDR</a>      |                       |
| 1.0   | 4971.1833 | 0.0191 | <a href="#">YDFAIMIPPGGTECFWQFAHQTYFYFSYEVQRTVGMSHDR</a>      |                       |

**Mascot:** <http://www.matrixscience.com/>

# Mascot Search Results

## Peptide View

MS/MS Fragmentation of **TQGNKQMLCTCLGNGVSCQETAVTQTYGGNSNGEPCVLPFTYNGR**  
 Found in **P02751** in **uni\_human\_nr**, FINC\_HUMAN Fibronectin OS=Homo sapiens GN=FN1 PE=1 SV=4

Match to Query 20586: 4968.206256 from(1243.058840,4+) intensity(1150345.1250) rtinseconds(2770) scans(16961) index(13382)  
 Title: 130806\_HPL\_Human\_Plaque\_BR1\_TR2\_06\_Spectrum035724\_scans\_\_16961\_RTINSECONDS=2770  
 Data file E:\\RAW\\HumanPlaques\\imgf\\T\\1D\\T130806\_HPL\_Human\_Plaque\_BR1\_TR2\_06.mgf

Click mouse within plot area to zoom in by factor of two about that point

Or, to Da  
 Label all possible matches Label matches used for scoring  
 Show Y-axis

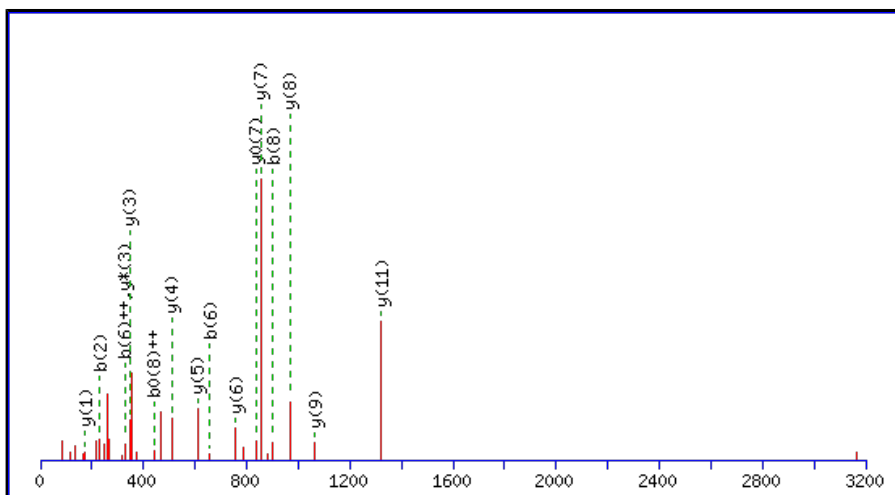

Monoisotopic mass of neutral peptide **Mr(calc): 4968.1994**  
**Fixed modifications:** Carbamidomethyl (C) (apply to specified residues or termini only)  
**Ions Score:** 51 **Expect:** 0.00023  
**Matches :** 16/518 fragment ions using 25 most intense peaks ([help](#))

| #  | b               | b <sup>++</sup> | b <sup>*</sup> | b <sup>*++</sup> | b <sup>0</sup> | b <sup>0++</sup> | Seq. | y         | y <sup>++</sup> | y <sup>*</sup> | y <sup>*++</sup> | y <sup>0</sup> | y <sup>0++</sup> | #  |
|----|-----------------|-----------------|----------------|------------------|----------------|------------------|------|-----------|-----------------|----------------|------------------|----------------|------------------|----|
| 1  | 102.0550        | 51.5311         |                |                  | 84.0444        | 42.5258          | T    |           |                 |                |                  |                |                  | 45 |
| 2  | <b>230.1135</b> | 115.5604        | 213.0870       | 107.0471         | 212.1030       | 106.5551         | Q    | 4868.1590 | 2434.5831       | 4851.1324      | 2426.0699        | 4850.1484      | 2425.5778        | 44 |
| 3  | 287.1350        | 144.0711        | 270.1084       | 135.5579         | 269.1244       | 135.0659         | G    | 4740.1004 | 2370.5538       | 4723.0738      | 2362.0406        | 4722.0898      | 2361.5486        | 43 |
| 4  | 401.1779        | 201.0926        | 384.1514       | 192.5793         | 383.1674       | 192.0873         | N    | 4683.0789 | 2342.0431       | 4666.0524      | 2333.5298        | 4665.0684      | 2333.0378        | 42 |
| 5  | 529.2729        | 265.1401        | 512.2463       | 256.6268         | 511.2623       | 256.1348         | K    | 4569.0360 | 2285.0216       | 4552.0095      | 2276.5084        | 4551.0254      | 2276.0164        | 41 |
| 6  | <b>657.3315</b> | <b>329.1694</b> | 640.3049       | 320.6561         | 639.3209       | 320.1641         | Q    | 4440.9410 | 2220.9742       | 4423.9145      | 2212.4609        | 4422.9305      | 2211.9689        | 40 |
| 7  | 788.3720        | 394.6896        | 771.3454       | 386.1763         | 770.3614       | 385.6843         | M    | 4312.8825 | 2156.9449       | 4295.8559      | 2148.4316        | 4294.8719      | 2147.9396        | 39 |
| 8  | <b>901.4560</b> | 451.2316        | 884.4295       | 442.7184         | 883.4454       | <b>442.2264</b>  | L    | 4181.8420 | 2091.4246       | 4164.8154      | 2082.9114        | 4163.8314      | 2082.4193        | 38 |
| 9  | 1061.4867       | 531.2470        | 1044.4601      | 522.7337         | 1043.4761      | 522.2417         | C    | 4068.7579 | 2034.8826       | 4051.7314      | 2026.3693        | 4050.7474      | 2025.8773        | 37 |
| 10 | 1162.5343       | 581.7708        | 1145.5078      | 573.2575         | 1144.5238      | 572.7655         | T    | 3908.7273 | 1954.8673       | 3891.7007      | 1946.3540        | 3890.7167      | 1945.8620        | 36 |
| 11 | 1322.5650       | 661.7861        | 1305.5384      | 653.2729         | 1304.5544      | 652.7809         | C    | 3807.6796 | 1904.3434       | 3790.6530      | 1895.8302        | 3789.6690      | 1895.3381        | 35 |
| 12 | 1435.6491       | 718.3282        | 1418.6225      | 709.8149         | 1417.6385      | 709.3229         | L    | 3647.6489 | 1824.3281       | 3630.6224      | 1815.8148        | 3629.6384      | 1815.3228        | 34 |
| 13 | 1492.6705       | 746.8389        | 1475.6440      | 738.3256         | 1474.6600      | 737.8336         | G    | 3534.5649 | 1767.7861       | 3517.5383      | 1759.2728        | 3516.5543      | 1758.7808        | 33 |
| 14 | 1606.7134       | 803.8604        | 1589.6869      | 795.3471         | 1588.7029      | 794.8551         | N    | 3477.5434 | 1739.2753       | 3460.5169      | 1730.7621        | 3459.5328      | 1730.2701        | 32 |
| 15 | 1663.7349       | 832.3711        | 1646.7084      | 823.8578         | 1645.7243      | 823.3658         | G    | 3363.5005 | 1682.2539       | 3346.4739      | 1673.7406        | 3345.4899      | 1673.2486        | 31 |
| 16 | 1762.8033       | 881.9053        | 1745.7768      | 873.3920         | 1744.7928      | 872.9000         | V    | 3306.4790 | 1653.7431       | 3289.4525      | 1645.2299        | 3288.4685      | 1644.7379        | 30 |
| 17 | 1849.8354       | 925.4213        | 1832.8088      | 916.9080         | 1831.8248      | 916.4160         | S    | 3207.4106 | 1604.2089       | 3190.3841      | 1595.6957        | 3189.4000      | 1595.2037        | 29 |
| 18 | 2009.8660       | 1005.4366       | 1992.8395      | 996.9234         | 1991.8554      | 996.4314         | C    | 3120.3786 | 1560.6929       | 3103.3520      | 1552.1797        | 3102.3680      | 1551.6876        | 28 |
| 19 | 2137.9246       | 1069.4659       | 2120.8980      | 1060.9527        | 2119.9140      | 1060.4606        | Q    | 2960.3479 | 1480.6776       | 2943.3214      | 1472.1643        | 2942.3374      | 1471.6723        | 27 |

|    |           |           |           |           |           |           |   |           |           |           |           |           |           |    |
|----|-----------|-----------|-----------|-----------|-----------|-----------|---|-----------|-----------|-----------|-----------|-----------|-----------|----|
| 20 | 2266.9672 | 1133.9872 | 2249.9406 | 1125.4739 | 2248.9566 | 1124.9819 | E | 2832.2894 | 1416.6483 | 2815.2628 | 1408.1350 | 2814.2788 | 1407.6430 | 26 |
| 21 | 2368.0149 | 1184.5111 | 2350.9883 | 1175.9978 | 2350.0043 | 1175.5058 | T | 2703.2468 | 1352.1270 | 2686.2202 | 1343.6137 | 2685.2362 | 1343.1217 | 25 |
| 22 | 2439.0520 | 1220.0296 | 2422.0254 | 1211.5163 | 2421.0414 | 1211.0243 | A | 2602.1991 | 1301.6032 | 2585.1725 | 1293.0899 | 2584.1885 | 1292.5979 | 24 |
| 23 | 2538.1204 | 1269.5638 | 2521.0938 | 1261.0506 | 2520.1098 | 1260.5585 | V | 2531.1620 | 1266.0846 | 2514.1354 | 1257.5713 | 2513.1514 | 1257.0793 | 23 |
| 24 | 2639.1681 | 1320.0877 | 2622.1415 | 1311.5744 | 2621.1575 | 1311.0824 | T | 2432.0936 | 1216.5504 | 2415.0670 | 1208.0371 | 2414.0830 | 1207.5451 | 22 |
| 25 | 2767.2266 | 1384.1170 | 2750.2001 | 1375.6037 | 2749.2161 | 1375.1117 | Q | 2331.0459 | 1166.0266 | 2314.0193 | 1157.5133 | 2313.0353 | 1157.0213 | 21 |
| 26 | 2868.2743 | 1434.6408 | 2851.2478 | 1426.1275 | 2850.2637 | 1425.6355 | T | 2202.9873 | 1101.9973 | 2185.9607 | 1093.4840 | 2184.9767 | 1092.9920 | 20 |
| 27 | 3031.3376 | 1516.1725 | 3014.3111 | 1507.6592 | 3013.3271 | 1507.1672 | Y | 2101.9396 | 1051.4734 | 2084.9131 | 1042.9602 | 2083.9291 | 1042.4682 | 19 |
| 28 | 3088.3591 | 1544.6832 | 3071.3326 | 1536.1699 | 3070.3485 | 1535.6779 | G | 1938.8763 | 969.9418  | 1921.8497 | 961.4285  | 1920.8657 | 960.9365  | 18 |
| 29 | 3145.3806 | 1573.1939 | 3128.3540 | 1564.6806 | 3127.3700 | 1564.1886 | G | 1881.8548 | 941.4310  | 1864.8283 | 932.9178  | 1863.8443 | 932.4258  | 17 |
| 30 | 3259.4235 | 1630.2154 | 3242.3969 | 1621.7021 | 3241.4129 | 1621.2101 | N | 1824.8334 | 912.9203  | 1807.8068 | 904.4070  | 1806.8228 | 903.9150  | 16 |
| 31 | 3346.4555 | 1673.7314 | 3329.4290 | 1665.2181 | 3328.4450 | 1664.7261 | S | 1710.7904 | 855.8989  | 1693.7639 | 847.3856  | 1692.7799 | 846.8936  | 15 |
| 32 | 3460.4985 | 1730.7529 | 3443.4719 | 1722.2396 | 3442.4879 | 1721.7476 | N | 1623.7584 | 812.3828  | 1606.7319 | 803.8696  | 1605.7478 | 803.3776  | 14 |
| 33 | 3517.5199 | 1759.2636 | 3500.4934 | 1750.7503 | 3499.5094 | 1750.2583 | G | 1509.7155 | 755.3614  | 1492.6889 | 746.8481  | 1491.7049 | 746.3561  | 13 |
| 34 | 3646.5625 | 1823.7849 | 3629.5360 | 1815.2716 | 3628.5519 | 1814.7796 | E | 1452.6940 | 726.8506  | 1435.6675 | 718.3374  | 1434.6834 | 717.8454  | 12 |
| 35 | 3743.6153 | 1872.3113 | 3726.5887 | 1863.7980 | 3725.6047 | 1863.3060 | P | 1323.6514 | 662.3293  | 1306.6249 | 653.8161  | 1305.6409 | 653.3241  | 11 |
| 36 | 3903.6459 | 1952.3266 | 3886.6194 | 1943.8133 | 3885.6354 | 1943.3213 | C | 1226.5987 | 613.8030  | 1209.5721 | 605.2897  | 1208.5881 | 604.7977  | 10 |
| 37 | 4002.7143 | 2001.8608 | 3985.6878 | 1993.3475 | 3984.7038 | 1992.8555 | V | 1066.5680 | 533.7876  | 1049.5415 | 525.2744  | 1048.5574 | 524.7824  | 9  |
| 38 | 4115.7984 | 2058.4028 | 4098.7719 | 2049.8896 | 4097.7878 | 2049.3976 | L | 967.4996  | 484.2534  | 950.4730  | 475.7402  | 949.4890  | 475.2482  | 8  |
| 39 | 4212.8512 | 2106.9292 | 4195.8246 | 2098.4159 | 4194.8406 | 2097.9239 | P | 854.4155  | 427.7114  | 837.3890  | 419.1981  | 836.4050  | 418.7061  | 7  |
| 40 | 4359.9196 | 2180.4634 | 4342.8930 | 2171.9502 | 4341.9090 | 2171.4581 | F | 757.3628  | 379.1850  | 740.3362  | 370.6717  | 739.3522  | 370.1797  | 6  |
| 41 | 4460.9673 | 2230.9873 | 4443.9407 | 2222.4740 | 4442.9567 | 2221.9820 | T | 610.2944  | 305.6508  | 593.2678  | 297.1375  | 592.2838  | 296.6455  | 5  |
| 42 | 4624.0306 | 2312.5189 | 4607.0040 | 2304.0057 | 4606.0200 | 2303.5136 | Y | 509.2467  | 255.1270  | 492.2201  | 246.6137  |           |           | 4  |
| 43 | 4738.0735 | 2369.5404 | 4721.0470 | 2361.0271 | 4720.0630 | 2360.5351 | N | 346.1833  | 173.5953  | 329.1568  | 165.0820  |           |           | 3  |
| 44 | 4795.0950 | 2398.0511 | 4778.0684 | 2389.5379 | 4777.0844 | 2389.0458 | G | 232.1404  | 116.5738  | 215.1139  | 108.0606  |           |           | 2  |
| 45 |           |           |           |           |           |           | R | 175.1190  | 88.0631   | 158.0924  | 79.5498   |           |           | 1  |

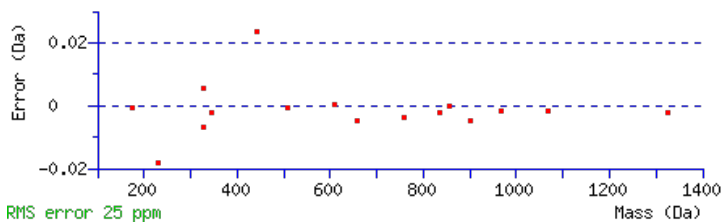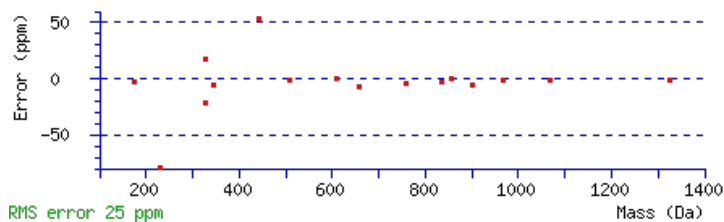

NCBI BLAST search of [TQGNKQMLCTCLGNGVSCQETA V TQTYGGNSNGEPCVLPFTYNGR](#)

(Parameters: blastp, nr protein database, expect=20000, no filter, PAM30)

Other BLAST [web gateways](#)

All matches to this query

| Score | Mr(calc)  | Delta   | Sequence                                                        |
|-------|-----------|---------|-----------------------------------------------------------------|
| 50.5  | 4968.1994 | 0.0068  | <a href="#">TQGNKQMLCTCLGNGVSCQETA V TQTYGGNSNGEPCVLPFTYNGR</a> |
| 1.3   | 4968.2159 | -0.0097 | <a href="#">AVLIDEVCTMNDGPHSALYTMMKDQYANYVVQK MIDVAEPGQR</a>    |

Mascot: <http://www.matrixscience.com/>

# Mascot Search Results

## Peptide View

MS/MS Fragmentation of **QGYNGRPNVEGK**

Found in **Q4ZHG4** in **uni\_human\_nr**, FNDC1\_HUMAN Fibronectin type III domain-containing protein 1 OS=Homo sapiens GN=FNDC1 PE=2 SV=4

Match to Query 2387: 1318.627212 from(440.549680,3+) intensity(238158.1094) rtinseconds(831) scans(2878) index(1182)

Title: 130809\_HPL\_Human\_Plaque\_BR1\_TR3\_05\_Spectrum023747\_scans\_\_2878\_RTINSECONDS=831

Data file E:\\RAW\\HumanPlaques\\mgf\\T\\1D\\T130809\_HPL\_Human\_Plaque\_BR1\_TR3\_05.mgf

Click mouse within plot area to zoom in by factor of two about that point

Or,  to  Da

Label all possible matches  Label matches used for scoring

Show Y-axis

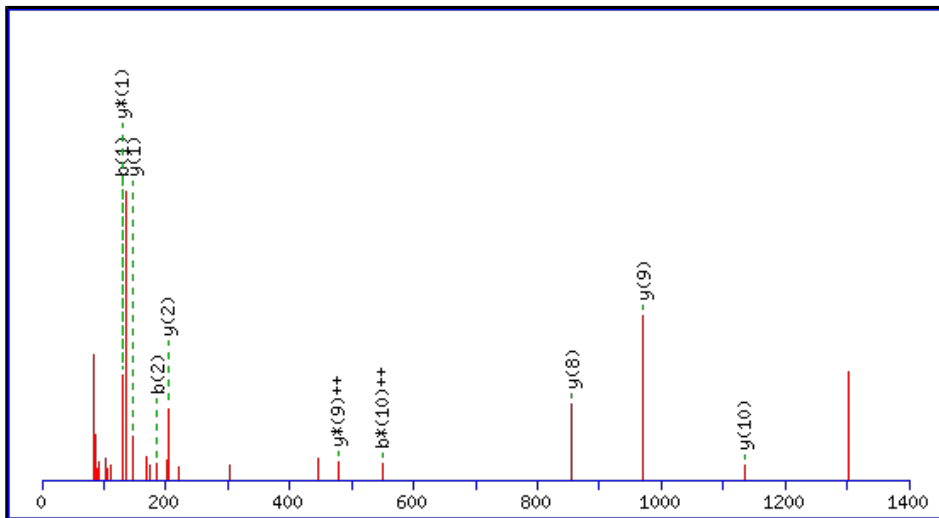

**Monoisotopic mass of neutral peptide Mr(calc):** 1318.6266

**Fixed modifications:** Carbamidomethyl (C) (apply to specified residues or termini only)

**Variable modifications:**

**N4** : Deamidated (NQ)

**Ions Score:** 28 **Expect:** 0.083

**Matches :** 10/110 fragment ions using 19 most intense peaks ([help](#))

| #  | b               | b <sup>++</sup> | b*        | b <sup>*++</sup> | b <sup>0</sup> | b <sup>0++</sup> | Seq. | y                | y <sup>++</sup> | y*              | y <sup>*++</sup> | y <sup>0</sup> | y <sup>0++</sup> | #  |
|----|-----------------|-----------------|-----------|------------------|----------------|------------------|------|------------------|-----------------|-----------------|------------------|----------------|------------------|----|
| 1  | <b>129.0659</b> | 65.0366         | 112.0393  | 56.5233          |                |                  | Q    |                  |                 |                 |                  |                |                  | 12 |
| 2  | <b>186.0873</b> | 93.5473         | 169.0608  | 85.0340          |                |                  | G    | 1191.5753        | 596.2913        | 1174.5487       | 587.7780         | 1173.5647      | 587.2860         | 11 |
| 3  | 349.1506        | 175.0790        | 332.1241  | 166.5657         |                |                  | Y    | <b>1134.5538</b> | 567.7805        | 1117.5273       | 559.2673         | 1116.5432      | 558.7753         | 10 |
| 4  | 464.1776        | 232.5924        | 447.1510  | 224.0792         |                |                  | N    | <b>971.4905</b>  | 486.2489        | 954.4639        | <b>477.7356</b>  | 953.4799       | 477.2436         | 9  |
| 5  | 521.1991        | 261.1032        | 504.1725  | 252.5899         |                |                  | G    | <b>856.4635</b>  | 428.7354        | 839.4370        | 420.2221         | 838.4530       | 419.7301         | 8  |
| 6  | 677.3002        | 339.1537        | 660.2736  | 330.6404         |                |                  | R    | 799.4421         | 400.2247        | 782.4155        | 391.7114         | 781.4315       | 391.2194         | 7  |
| 7  | 774.3529        | 387.6801        | 757.3264  | 379.1668         |                |                  | P    | 643.3410         | 322.1741        | 626.3144        | 313.6608         | 625.3304       | 313.1688         | 6  |
| 8  | 888.3959        | 444.7016        | 871.3693  | 436.1883         |                |                  | N    | 546.2882         | 273.6477        | 529.2617        | 265.1345         | 528.2776       | 264.6425         | 5  |
| 9  | 987.4643        | 494.2358        | 970.4377  | 485.7225         |                |                  | V    | 432.2453         | 216.6263        | 415.2187        | 208.1130         | 414.2347       | 207.6210         | 4  |
| 10 | 1116.5069       | 558.7571        | 1099.4803 | <b>550.2438</b>  | 1098.4963      | 549.7518         | E    | 333.1769         | 167.0921        | 316.1503        | 158.5788         | 315.1663       | 158.0868         | 3  |
| 11 | 1173.5283       | 587.2678        | 1156.5018 | 578.7545         | 1155.5178      | 578.2625         | G    | <b>204.1343</b>  | 102.5708        | 187.1077        | 94.0575          |                |                  | 2  |
| 12 |                 |                 |           |                  |                |                  | K    | <b>147.1128</b>  | 74.0600         | <b>130.0863</b> | 65.5468          |                |                  | 1  |

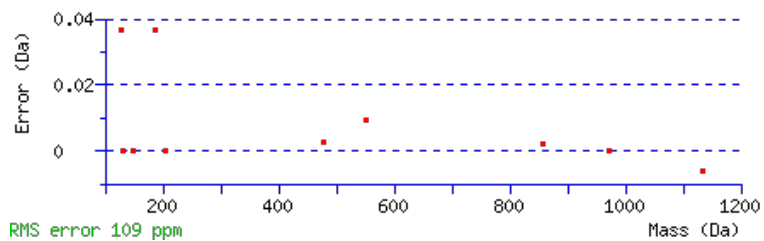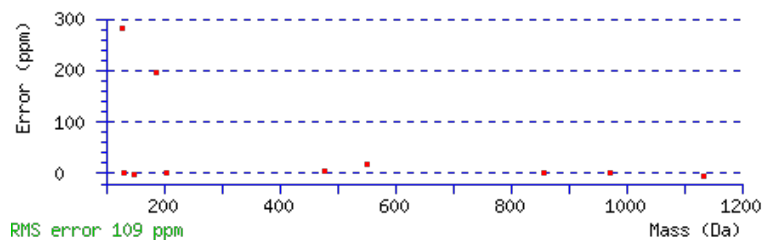

NCBI BLAST search of [QGYNGRPNVEGK](#)

(Parameters: blastp, nr protein database, expect=20000, no filter, PAM30)

Other BLAST [web gateways](#)

**All matches to this query**

| Score | Mr(calc)  | Delta  | Sequence                      |
|-------|-----------|--------|-------------------------------|
| 28.4  | 1318.6266 | 0.0007 | <a href="#">QGYNGRPNVEGK</a>  |
| 19.5  | 1318.6266 | 0.0007 | <a href="#">QGYNGRPNVEGK</a>  |
| 8.2   | 1318.6228 | 0.0045 | <a href="#">QTFSFLSGMTGK</a>  |
| 5.2   | 1318.6266 | 0.0007 | <a href="#">QGYNGRPNVEGK</a>  |
| 4.8   | 1317.6234 | 1.0038 | <a href="#">SQPSAAQPSKMGK</a> |
| 3.0   | 1318.6265 | 0.0007 | <a href="#">QAQARSWASQGK</a>  |
| 3.0   | 1318.6265 | 0.0007 | <a href="#">QAQARSWASQGK</a>  |
| 0.4   | 1318.6225 | 0.0047 | <a href="#">RNRSDTEQEGK</a>   |

Mascot: <http://www.matrixscience.com/>

# Mascot Search Results

## Peptide View

MS/MS Fragmentation of **RNANGRSPNNSDK**

Found in **H7C550** in **uni\_human\_nr**, H7C550\_HUMAN FERM domain-containing protein 4B (Fragment) OS=Homo sapiens  
GN=FRMD4B PE=4 SV=1

Match to Query 3146: 1433.616188 from(717.815370,2+) intensity(269886.9375) rtinseconds(1563) scans(7830) index(5676)

Title: 130806\_HPL\_Human\_Plaque\_BR1\_TR2\_20\_Spectrum025544\_scans\_\_7830\_RTINSECONDS=1563

Data file E:\\RAW\\HumanPlaques\\mgf\\T\\1D\\T130806\_HPL\_Human\_Plaque\_BR1\_TR2\_20.mgf

Click mouse within plot area to zoom in by factor of two about that point

Or,  to  Da

Label all possible matches  Label matches used for scoring

Show Y-axis

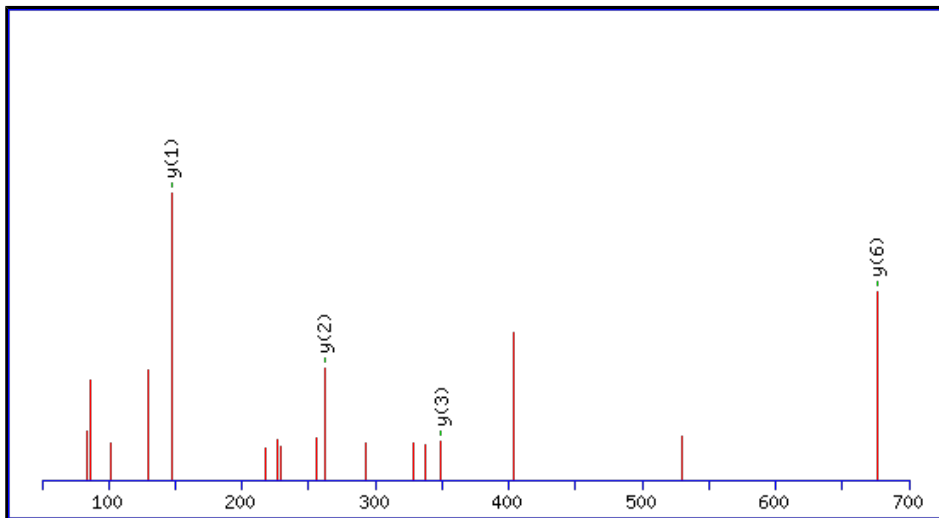

**Monoisotopic mass of neutral peptide Mr(calc):** 1432.6178

**Fixed modifications:** Carbamidomethyl (C) (apply to specified residues or termini only)

**Variable modifications:**

**N2** : Deamidated (NQ)

**N4** : Deamidated (NQ)

**N9** : Deamidated (NQ)

**N10** : Deamidated (NQ)

**Ions Score:** 27 **Expect:** 0.043

**Matches** : 4/130 fragment ions using 6 most intense peaks ([help](#))

| #  | b         | b <sup>++</sup> | b <sup>*</sup> | b <sup>*++</sup> | b <sup>0</sup> | b <sup>0++</sup> | Seq. | y               | y <sup>++</sup> | y <sup>*</sup> | y <sup>*++</sup> | y <sup>0</sup> | y <sup>0++</sup> | #  |
|----|-----------|-----------------|----------------|------------------|----------------|------------------|------|-----------------|-----------------|----------------|------------------|----------------|------------------|----|
| 1  | 157.1084  | 79.0578         | 140.0818       | 70.5446          |                |                  | R    |                 |                 |                |                  |                |                  | 13 |
| 2  | 272.1353  | 136.5713        | 255.1088       | 128.0580         |                |                  | N    | 1277.5240       | 639.2657        | 1260.4975      | 630.7524         | 1259.5135      | 630.2604         | 12 |
| 3  | 343.1724  | 172.0899        | 326.1459       | 163.5766         |                |                  | A    | 1162.4971       | 581.7522        | 1145.4705      | 573.2389         | 1144.4865      | 572.7469         | 11 |
| 4  | 458.1994  | 229.6033        | 441.1728       | 221.0901         |                |                  | N    | 1091.4600       | 546.2336        | 1074.4334      | 537.7203         | 1073.4494      | 537.2283         | 10 |
| 5  | 515.2209  | 258.1141        | 498.1943       | 249.6008         |                |                  | G    | 976.4330        | 488.7202        | 959.4065       | 480.2069         | 958.4225       | 479.7149         | 9  |
| 6  | 671.3220  | 336.1646        | 654.2954       | 327.6513         |                |                  | R    | 919.4116        | 460.2094        | 902.3850       | 451.6961         | 901.4010       | 451.2041         | 8  |
| 7  | 758.3540  | 379.6806        | 741.3274       | 371.1674         | 740.3434       | 370.6754         | S    | 763.3105        | 382.1589        | 746.2839       | 373.6456         | 745.2999       | 373.1536         | 7  |
| 8  | 855.4068  | 428.2070        | 838.3802       | 419.6937         | 837.3962       | 419.2017         | P    | <b>676.2784</b> | 338.6429        | 659.2519       | 330.1296         | 658.2679       | 329.6376         | 6  |
| 9  | 970.4337  | 485.7205        | 953.4071       | 477.2072         | 952.4231       | 476.7152         | N    | 579.2257        | 290.1165        | 562.1991       | 281.6032         | 561.2151       | 281.1112         | 5  |
| 10 | 1085.4606 | 543.2340        | 1068.4341      | 534.7207         | 1067.4501      | 534.2287         | N    | 464.1987        | 232.6030        | 447.1722       | 224.0897         | 446.1882       | 223.5977         | 4  |
| 11 | 1172.4927 | 586.7500        | 1155.4661      | 578.2367         | 1154.4821      | 577.7447         | S    | <b>349.1718</b> | 175.0895        | 332.1452       | 166.5763         | 331.1612       | 166.0842         | 3  |
| 12 | 1287.5196 | 644.2634        | 1270.4931      | 635.7502         | 1269.5090      | 635.2582         | D    | <b>262.1397</b> | 131.5735        | 245.1132       | 123.0602         | 244.1292       | 122.5682         | 2  |
| 13 |           |                 |                |                  |                |                  | K    | <b>147.1128</b> | 74.0600         | 130.0863       | 65.5468          |                |                  | 1  |



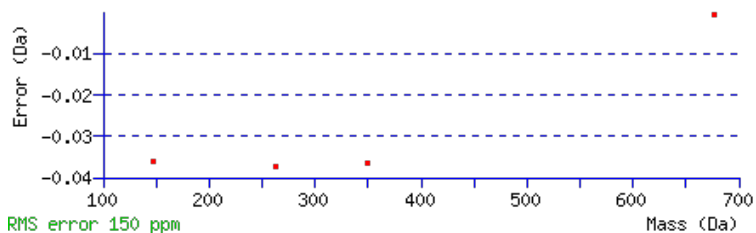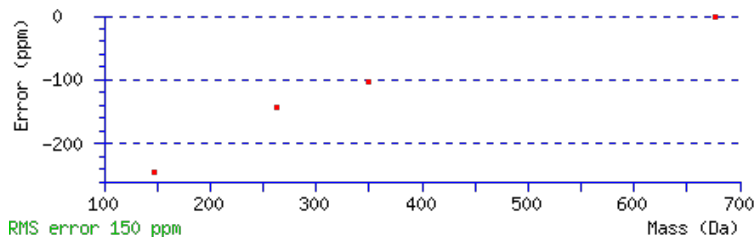

NCBI BLAST search of [RNANGRSPNNSDK](#)

(Parameters: blastp, nr protein database, expect=20000, no filter, PAM30)

Other BLAST [web gateways](#)

**All matches to this query**

| Score | Mr(calc)  | Delta   | Sequence                      |
|-------|-----------|---------|-------------------------------|
| 26.7  | 1432.6178 | 0.9984  | <a href="#">RNANGRSPNNSDK</a> |
| 18.3  | 1431.6154 | 2.0008  | <a href="#">DTQWPENNLADK</a>  |
| 15.2  | 1431.6089 | 2.0073  | <a href="#">EWMTQQTEHMK</a>   |
| 14.7  | 1432.6140 | 1.0022  | <a href="#">SHMEEKDGLEDK</a>  |
| 5.1   | 1431.6089 | 2.0073  | <a href="#">EWMTQQTEHMK</a>   |
| 4.7   | 1431.6048 | 2.0114  | <a href="#">QREKMNDHMK</a>    |
| 4.7   | 1431.6048 | 2.0114  | <a href="#">QREKMNDHMK</a>    |
| 3.4   | 1433.6207 | -0.0045 | <a href="#">FDYLMQLMNDK</a>   |
| 3.4   | 1433.6207 | -0.0045 | <a href="#">FDYLMQLMNDK</a>   |
| 3.4   | 1433.6207 | -0.0045 | <a href="#">YDYLMQLMNDK</a>   |

Mascot: <http://www.matrixscience.com/>

# Mascot Search Results

## Peptide View

MS/MS Fragmentation of **SRYDVFCFTSNFNGR**

Found in **P10915** in **uni\_human\_nr**, HPLN1\_HUMAN Hyaluronan and proteoglycan link protein 1 OS=Homo sapiens GN=HAPLN1 PE=2 SV=2

Match to Query 6444: 1870.794582 from(624.605470,3+) intensity(1459466.8750) rtinseconds(2632) scans(15301) index(11764)

Title: 130806\_HPL\_Human\_Plaque\_BR2\_TR2\_09\_Spectrum032986\_scans\_\_15301\_RTINSECONDS=2632

Data file E:\RAW\HumanPlaques\mgf\T\1D\T130806\_HPL\_Human\_Plaque\_BR2\_TR2\_09.mgf

Click mouse within plot area to zoom in by factor of two about that point

Or,  to  Da

Label all possible matches  Label matches used for scoring

Show Y-axis

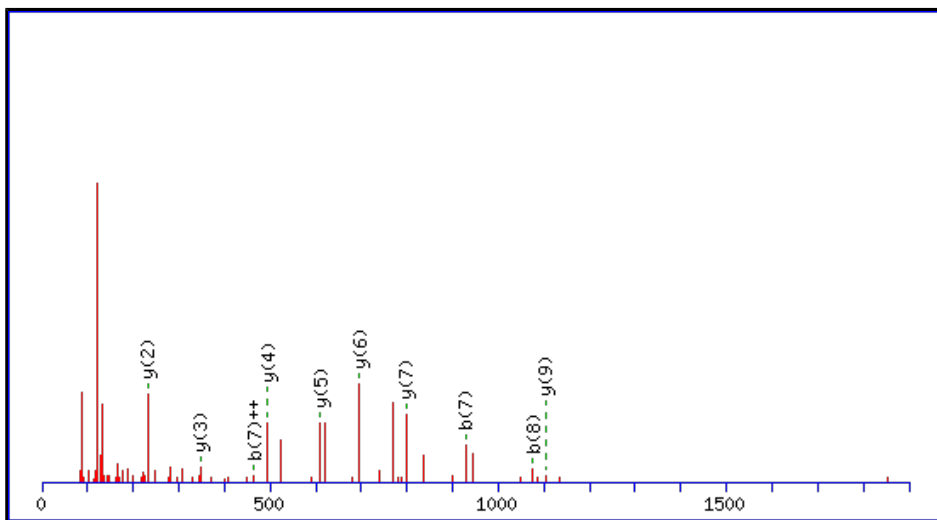

Monoisotopic mass of neutral peptide **Mr(calc):** 1870.7944

**Fixed modifications:** Carbamidomethyl (C) (apply to specified residues or termini only)

**Variable modifications:**

N11 : Deamidated (NQ)

N13 : Deamidated (NQ)

**Ions Score:** 60 **Expect:** 1.8e-005

**Matches :** 10/156 fragment ions using 12 most intense peaks ([help](#))

| #  | b                | b <sup>++</sup> | b <sup>*</sup> | b <sup>*++</sup> | b <sup>0</sup> | b <sup>0++</sup> | Seq. | y                | y <sup>++</sup> | y <sup>*</sup> | y <sup>*++</sup> | y <sup>0</sup> | y <sup>0++</sup> | #  |
|----|------------------|-----------------|----------------|------------------|----------------|------------------|------|------------------|-----------------|----------------|------------------|----------------|------------------|----|
| 1  | 88.0393          | 44.5233         |                |                  | 70.0287        | 35.5180          | S    |                  |                 |                |                  |                |                  | 15 |
| 2  | 244.1404         | 122.5738        | 227.1139       | 114.0606         | 226.1298       | 113.5686         | R    | 1784.7697        | 892.8885        | 1767.7431      | 884.3752         | 1766.7591      | 883.8832         | 14 |
| 3  | 407.2037         | 204.1055        | 390.1772       | 195.5922         | 389.1932       | 195.1002         | Y    | 1628.6686        | 814.8379        | 1611.6420      | 806.3247         | 1610.6580      | 805.8326         | 13 |
| 4  | 522.2307         | 261.6190        | 505.2041       | 253.1057         | 504.2201       | 252.6137         | D    | 1465.6053        | 733.3063        | 1448.5787      | 724.7930         | 1447.5947      | 724.3010         | 12 |
| 5  | 621.2991         | 311.1532        | 604.2726       | 302.6399         | 603.2885       | 302.1479         | V    | 1350.5783        | 675.7928        | 1333.5518      | 667.2795         | 1332.5677      | 666.7875         | 11 |
| 6  | 768.3675         | 384.6874        | 751.3410       | 376.1741         | 750.3569       | 375.6821         | F    | 1251.5099        | 626.2586        | 1234.4834      | 617.7453         | 1233.4993      | 617.2533         | 10 |
| 7  | <b>928.3982</b>  | <b>464.7027</b> | 911.3716       | 456.1894         | 910.3876       | 455.6974         | C    | <b>1104.4415</b> | 552.7244        | 1087.4149      | 544.2111         | 1086.4309      | 543.7191         | 9  |
| 8  | <b>1075.4666</b> | 538.2369        | 1058.4400      | 529.7237         | 1057.4560      | 529.2316         | F    | 944.4108         | 472.7091        | 927.3843       | 464.1958         | 926.4003       | 463.7038         | 8  |
| 9  | 1176.5143        | 588.7608        | 1159.4877      | 580.2475         | 1158.5037      | 579.7555         | T    | <b>797.3424</b>  | 399.1748        | 780.3159       | 390.6616         | 779.3319       | 390.1696         | 7  |
| 10 | 1263.5463        | 632.2768        | 1246.5197      | 623.7635         | 1245.5357      | 623.2715         | S    | <b>696.2947</b>  | 348.6510        | 679.2682       | 340.1377         | 678.2842       | 339.6457         | 6  |
| 11 | 1378.5732        | 689.7903        | 1361.5467      | 681.2770         | 1360.5627      | 680.7850         | N    | <b>609.2627</b>  | 305.1350        | 592.2362       | 296.6217         |                |                  | 5  |
| 12 | 1525.6416        | 763.3245        | 1508.6151      | 754.8112         | 1507.6311      | 754.3192         | F    | <b>494.2358</b>  | 247.6215        | 477.2092       | 239.1083         |                |                  | 4  |
| 13 | 1640.6686        | 820.8379        | 1623.6420      | 812.3247         | 1622.6580      | 811.8326         | N    | <b>347.1674</b>  | 174.0873        | 330.1408       | 165.5740         |                |                  | 3  |
| 14 | 1697.6900        | 849.3487        | 1680.6635      | 840.8354         | 1679.6795      | 840.3434         | G    | <b>232.1404</b>  | 116.5738        | 215.1139       | 108.0606         |                |                  | 2  |

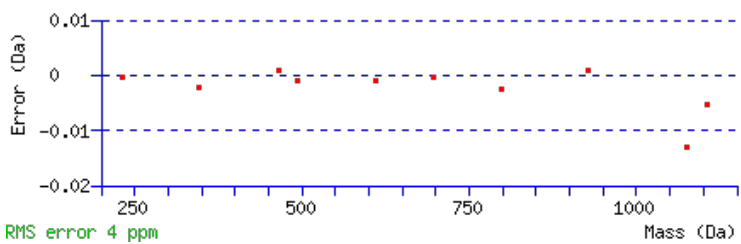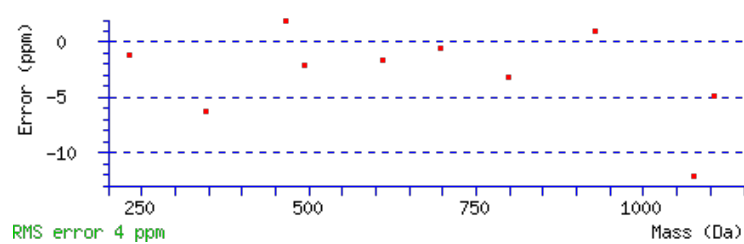

NCBI BLAST search of [SRYDVFCFTSNENGR](#)

(Parameters: blastp, nr protein database, expect=20000, no filter, PAM30)

Other BLAST [web gateways](#)

All matches to this query

| Score | Mr(calc)  | Delta  | Sequence                        |
|-------|-----------|--------|---------------------------------|
| 60.1  | 1870.7944 | 0.0001 | <a href="#">SRYDVFCFTSNENGR</a> |

Mascot: <http://www.matrixscience.com/>

# Mascot Search Results

## Peptide View

MS/MS Fragmentation of **SRYDVFCFTSNFNGR**

Found in **P10915** in **uni\_human\_nr**, HPLN1\_HUMAN Hyaluronan and proteoglycan link protein 1 OS=Homo sapiens GN=HAPLN1 PE=2 SV=2

Match to Query 7282: 1869.811662 from(624.277830,3+) intensity(5708795.0000) rtinseconds(2501) scans(15486) index(12280)

Title: 130801\_HPL\_Human\_Plaque\_BR1\_TR1\_04\_Spectrum035278\_scans\_\_15486\_RTINSECONDS=2501

Data file E:\\RAW\\HumanPlaques\\mgf\\T\\1D\\T130801\_HPL\_Human\_Plaque\_BR1\_TR1\_04.mgf

Click mouse within plot area to zoom in by factor of two about that point

Or,  to  Da

Label all possible matches  Label matches used for scoring

Show Y-axis

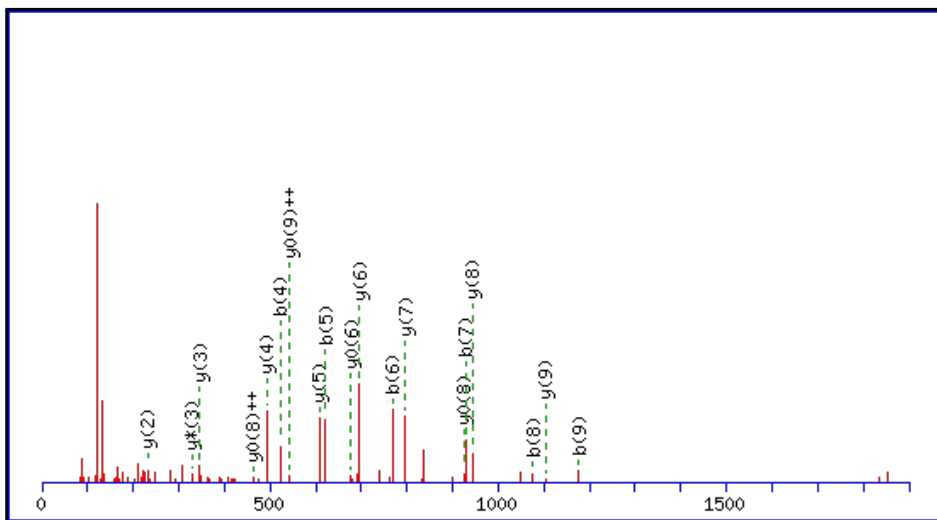

**Monoisotopic mass of neutral peptide Mr(calc):** 1869.8104

**Fixed modifications:** Carbamidomethyl (C) (apply to specified residues or termini only)

**Variable modifications:**

N11 : Deamidated (NQ)

**Ions Score:** 51 **Expect:** 0.00019

**Matches :** 19/156 fragment ions using 33 most intense peaks ([help](#))

| #  | b                | b <sup>++</sup> | b*        | b <sup>*++</sup> | b <sup>0</sup> | b <sup>0++</sup> | Seq. | y                | y <sup>++</sup> | y*              | y <sup>*++</sup> | y <sup>0</sup>  | y <sup>0++</sup> | #  |
|----|------------------|-----------------|-----------|------------------|----------------|------------------|------|------------------|-----------------|-----------------|------------------|-----------------|------------------|----|
| 1  | 88.0393          | 44.5233         |           |                  | 70.0287        | 35.5180          | S    |                  |                 |                 |                  |                 |                  | 15 |
| 2  | 244.1404         | 122.5738        | 227.1139  | 114.0606         | 226.1298       | 113.5686         | R    | 1783.7857        | 892.3965        | 1766.7591       | 883.8832         | 1765.7751       | 883.3912         | 14 |
| 3  | 407.2037         | 204.1055        | 390.1772  | 195.5922         | 389.1932       | 195.1002         | Y    | 1627.6846        | 814.3459        | 1610.6580       | 805.8326         | 1609.6740       | 805.3406         | 13 |
| 4  | <b>522.2307</b>  | 261.6190        | 505.2041  | 253.1057         | 504.2201       | 252.6137         | D    | 1464.6212        | 732.8143        | 1447.5947       | 724.3010         | 1446.6107       | 723.8090         | 12 |
| 5  | <b>621.2991</b>  | 311.1532        | 604.2726  | 302.6399         | 603.2885       | 302.1479         | V    | 1349.5943        | 675.3008        | 1332.5677       | 666.7875         | 1331.5837       | 666.2955         | 11 |
| 6  | <b>768.3675</b>  | 384.6874        | 751.3410  | 376.1741         | 750.3569       | 375.6821         | F    | 1250.5259        | 625.7666        | 1233.4993       | 617.2533         | 1232.5153       | 616.7613         | 10 |
| 7  | <b>928.3982</b>  | 464.7027        | 911.3716  | 456.1894         | 910.3876       | 455.6974         | C    | <b>1103.4575</b> | 552.2324        | 1086.4309       | 543.7191         | 1085.4469       | <b>543.2271</b>  | 9  |
| 8  | <b>1075.4666</b> | 538.2369        | 1058.4400 | 529.7237         | 1057.4560      | 529.2316         | F    | <b>943.4268</b>  | 472.2170        | 926.4003        | 463.7038         | <b>925.4163</b> | <b>463.2118</b>  | 8  |
| 9  | <b>1176.5143</b> | 588.7608        | 1159.4877 | 580.2475         | 1158.5037      | 579.7555         | T    | <b>796.3584</b>  | 398.6828        | 779.3319        | 390.1696         | 778.3478        | 389.6776         | 7  |
| 10 | 1263.5463        | 632.2768        | 1246.5197 | 623.7635         | 1245.5357      | 623.2715         | S    | <b>695.3107</b>  | 348.1590        | 678.2842        | 339.6457         | <b>677.3002</b> | 339.1537         | 6  |
| 11 | 1378.5732        | 689.7903        | 1361.5467 | 681.2770         | 1360.5627      | 680.7850         | N    | <b>608.2787</b>  | 304.6430        | 591.2522        | 296.1297         |                 |                  | 5  |
| 12 | 1525.6416        | 763.3245        | 1508.6151 | 754.8112         | 1507.6311      | 754.3192         | F    | <b>493.2518</b>  | 247.1295        | 476.2252        | 238.6162         |                 |                  | 4  |
| 13 | 1639.6846        | 820.3459        | 1622.6580 | 811.8326         | 1621.6740      | 811.3406         | N    | <b>346.1833</b>  | 173.5953        | <b>329.1568</b> | 165.0820         |                 |                  | 3  |
| 14 | 1696.7060        | 848.8567        | 1679.6795 | 840.3434         | 1678.6955      | 839.8514         | G    | <b>232.1404</b>  | 116.5738        | 215.1139        | 108.0606         |                 |                  | 2  |
| 15 |                  |                 |           |                  |                |                  | R    | 175.1190         | 88.0631         | 158.0924        | 79.5498          |                 |                  | 1  |

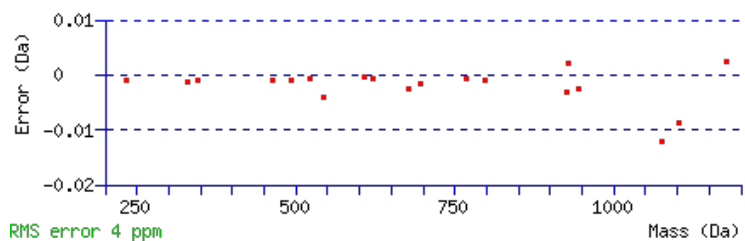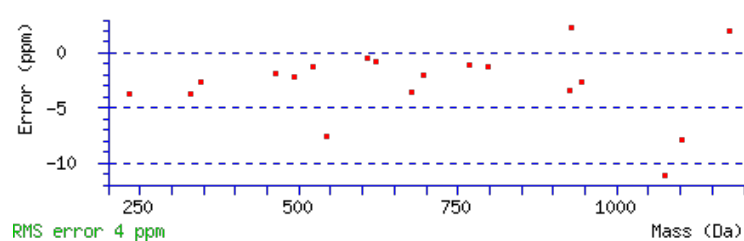

NCBI BLAST search of [SRYDVFCFETSNENGR](#)

(Parameters: blastp, nr protein database, expect=20000, no filter, PAM30)

Other BLAST [web gateways](#)

**All matches to this query**

| Score | Mr(calc)  | Delta  | Sequence                         | Site Analysis         |
|-------|-----------|--------|----------------------------------|-----------------------|
| 51.5  | 1869.8104 | 0.0012 | <a href="#">SRYDVFCFETSNENGR</a> | Deamidated N11 98.55% |
| 33.2  | 1869.8104 | 0.0012 | <a href="#">SRYDVFCFETSNENGR</a> | Deamidated N13 1.45%  |

Mascot: <http://www.matrixscience.com/>

# Mascot Search Results

## Peptide View

MS/MS Fragmentation of **SRYDVFCFTSNFNGR**

Found in **P10915** in **uni\_human\_nr**, HPLN1\_HUMAN Hyaluronan and proteoglycan link protein 1 OS=Homo sapiens GN=HAPLN1 PE=2 SV=2

Match to Query 8021: 1869.811988 from(935.913270,2+) intensity(2719202.2500) rtinseconds(2479) scans(15953) index(12909)

Title: 130806\_HPL\_Human\_Plaque\_BR1\_TR2\_03\_Spectrum036848\_scans\_\_15953\_RTINSECONDS=2479

Data file E:\RAW\HumanPlaques\mgf\T\1D\T130806\_HPL\_Human\_Plaque\_BR1\_TR2\_03.mgf

Click mouse within plot area to zoom in by factor of two about that point

Or,  to  Da

Label all possible matches  Label matches used for scoring

Show Y-axis

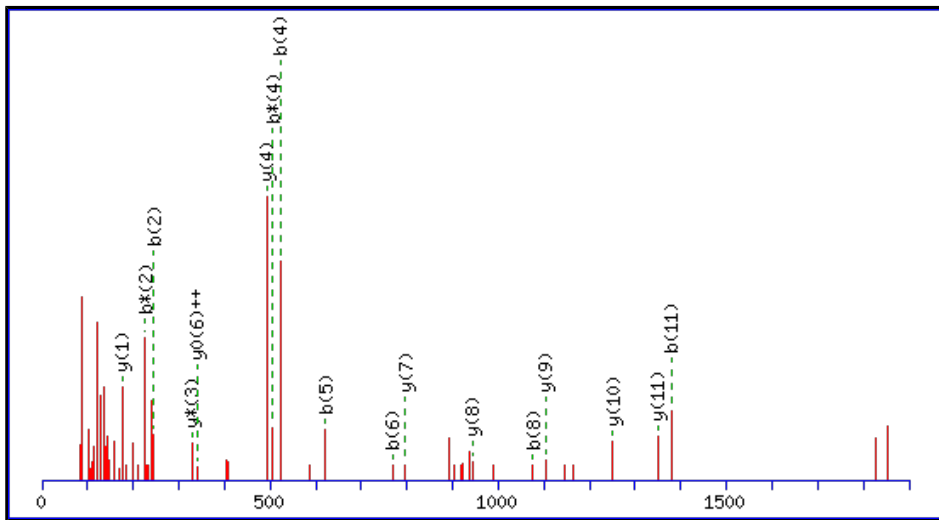

Monoisotopic mass of neutral peptide **Mr(calc)**: 1869.8104

**Fixed modifications**: Carbamidomethyl (C) (apply to specified residues or termini only)

**Variable modifications**:

N11 : Deamidated (NQ)

**Ions Score**: 37 **Expect**: 0.0059

**Matches** : 17/156 fragment ions using 33 most intense peaks ([help](#))

| #  | b                | b <sup>++</sup> | b <sup>*</sup>  | b <sup>*++</sup> | b <sup>0</sup> | b <sup>0++</sup> | Seq. | y                | y <sup>++</sup> | y <sup>*</sup>  | y <sup>*++</sup> | y <sup>0</sup> | y <sup>0++</sup> | #  |
|----|------------------|-----------------|-----------------|------------------|----------------|------------------|------|------------------|-----------------|-----------------|------------------|----------------|------------------|----|
| 1  | 88.0393          | 44.5233         |                 |                  | 70.0287        | 35.5180          | S    |                  |                 |                 |                  |                |                  | 15 |
| 2  | <b>244.1404</b>  | 122.5738        | <b>227.1139</b> | 114.0606         | 226.1298       | 113.5686         | R    | 1783.7857        | 892.3965        | 1766.7591       | 883.8832         | 1765.7751      | 883.3912         | 14 |
| 3  | 407.2037         | 204.1055        | 390.1772        | 195.5922         | 389.1932       | 195.1002         | Y    | 1627.6846        | 814.3459        | 1610.6580       | 805.8326         | 1609.6740      | 805.3406         | 13 |
| 4  | <b>522.2307</b>  | 261.6190        | <b>505.2041</b> | 253.1057         | 504.2201       | 252.6137         | D    | 1464.6212        | 732.8143        | 1447.5947       | 724.3010         | 1446.6107      | 723.8090         | 12 |
| 5  | <b>621.2991</b>  | 311.1532        | 604.2726        | 302.6399         | 603.2885       | 302.1479         | V    | <b>1349.5943</b> | 675.3008        | 1332.5677       | 666.7875         | 1331.5837      | 666.2955         | 11 |
| 6  | <b>768.3675</b>  | 384.6874        | 751.3410        | 376.1741         | 750.3569       | 375.6821         | F    | <b>1250.5259</b> | 625.7666        | 1233.4993       | 617.2533         | 1232.5153      | 616.7613         | 10 |
| 7  | 928.3982         | 464.7027        | 911.3716        | 456.1894         | 910.3876       | 455.6974         | C    | <b>1103.4575</b> | 552.2324        | 1086.4309       | 543.7191         | 1085.4469      | 543.2271         | 9  |
| 8  | <b>1075.4666</b> | 538.2369        | 1058.4400       | 529.7237         | 1057.4560      | 529.2316         | F    | <b>943.4268</b>  | 472.2170        | 926.4003        | 463.7038         | 925.4163       | 463.2118         | 8  |
| 9  | 1176.5143        | 588.7608        | 1159.4877       | 580.2475         | 1158.5037      | 579.7555         | T    | <b>796.3584</b>  | 398.6828        | 779.3319        | 390.1696         | 778.3478       | 389.6776         | 7  |
| 10 | 1263.5463        | 632.2768        | 1246.5197       | 623.7635         | 1245.5357      | 623.2715         | S    | 695.3107         | 348.1590        | 678.2842        | 339.6457         | 677.3002       | <b>339.1537</b>  | 6  |
| 11 | <b>1378.5732</b> | 689.7903        | 1361.5467       | 681.2770         | 1360.5627      | 680.7850         | N    | 608.2787         | 304.6430        | 591.2522        | 296.1297         |                |                  | 5  |
| 12 | 1525.6416        | 763.3245        | 1508.6151       | 754.8112         | 1507.6311      | 754.3192         | F    | <b>493.2518</b>  | 247.1295        | 476.2252        | 238.6162         |                |                  | 4  |
| 13 | 1639.6846        | 820.3459        | 1622.6580       | 811.8326         | 1621.6740      | 811.3406         | N    | 346.1833         | 173.5953        | <b>329.1568</b> | 165.0820         |                |                  | 3  |
| 14 | 1696.7060        | 848.8567        | 1679.6795       | 840.3434         | 1678.6955      | 839.8514         | G    | 232.1404         | 116.5738        | 215.1139        | 108.0606         |                |                  | 2  |
| 15 |                  |                 |                 |                  |                |                  | R    | <b>175.1190</b>  | 88.0631         | 158.0924        | 79.5498          |                |                  | 1  |

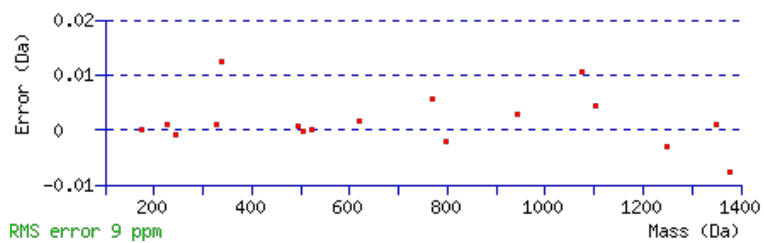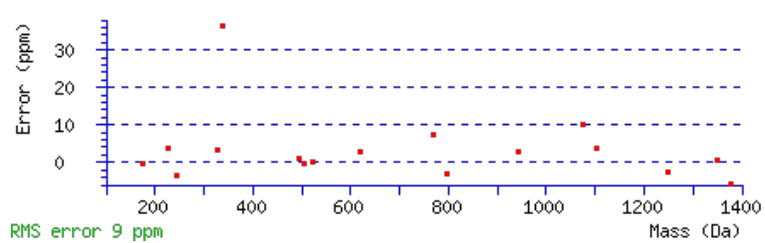

NCBI BLAST search of [SRYDVFCFETSNENGR](#)

(Parameters: blastp, nr protein database, expect=20000, no filter, PAM30)

Other BLAST [web gateways](#)

**All matches to this query**

| Score | Mr(calc)  | Delta  | Sequence                         | Site Analysis         |
|-------|-----------|--------|----------------------------------|-----------------------|
| 36.8  | 1869.8104 | 0.0015 | <a href="#">SRYDVFCFETSNENGR</a> | Deamidated N11 95.07% |
| 23.9  | 1869.8104 | 0.0015 | <a href="#">SRYDVFCFETSNENGR</a> | Deamidated N13 4.93%  |

Mascot: <http://www.matrixscience.com/>

# Mascot Search Results

## Peptide View

MS/MS Fragmentation of **SRYDVFCFTSNFNGR**

Found in **P10915** in **uni\_human\_nr**, HPLN1\_HUMAN Hyaluronan and proteoglycan link protein 1 OS=Homo sapiens GN=HAPLN1 PE=2 SV=2

Match to Query 8867: 1868.827122 from(623.949650,3+) intensity(3956803.0000) rtinseconds(2301) scans(14978) index(11978)

Title: 130809\_HPL\_Human\_Plaque\_BR1\_TR3\_02\_Spectrum036504\_scans\_\_14978\_RTINSECONDS=2301

Data file E:\\RAW\\HumanPlaques\\mgf\\T\\1D\\T130809\_HPL\_Human\_Plaque\_BR1\_TR3\_02.mgf

Click mouse within plot area to zoom in by factor of two about that point

Or,  to  Da

Label all possible matches  Label matches used for scoring

Show Y-axis

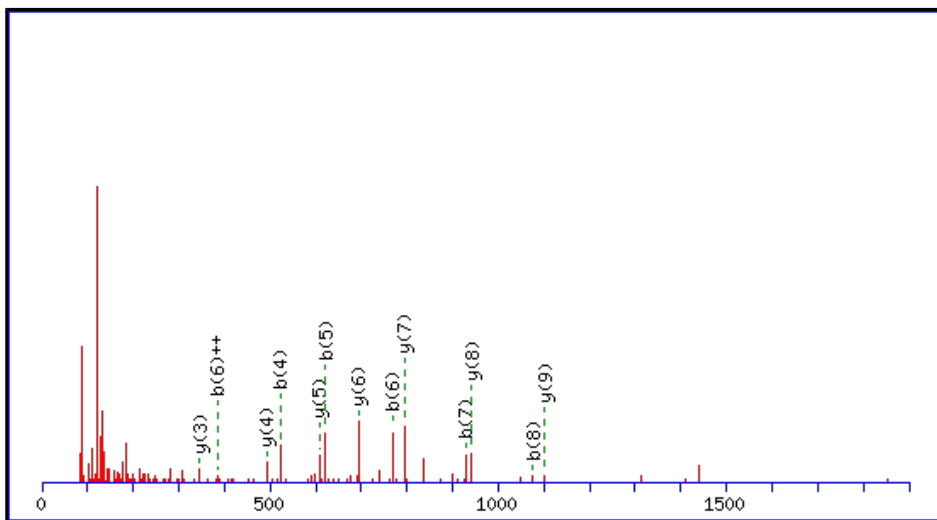

Monoisotopic mass of neutral peptide **Mr(calc):** 1868.8264

**Fixed modifications:** Carbamidomethyl (C) (apply to specified residues or termini only)

**Ions Score:** 39 **Expect:** 0.0053

**Matches :** 13/156 fragment ions using 25 most intense peaks ([help](#))

| #  | b                | b <sup>++</sup> | b <sup>*</sup> | b <sup>*++</sup> | b <sup>0</sup> | b <sup>0++</sup> | Seq. | y                | y <sup>++</sup> | y <sup>*</sup> | y <sup>*++</sup> | y <sup>0</sup> | y <sup>0++</sup> | #  |
|----|------------------|-----------------|----------------|------------------|----------------|------------------|------|------------------|-----------------|----------------|------------------|----------------|------------------|----|
| 1  | 88.0393          | 44.5233         |                |                  | 70.0287        | 35.5180          | S    |                  |                 |                |                  |                |                  | 15 |
| 2  | 244.1404         | 122.5738        | 227.1139       | 114.0606         | 226.1298       | 113.5686         | R    | 1782.8017        | 891.9045        | 1765.7751      | 883.3912         | 1764.7911      | 882.8992         | 14 |
| 3  | 407.2037         | 204.1055        | 390.1772       | 195.5922         | 389.1932       | 195.1002         | Y    | 1626.7006        | 813.8539        | 1609.6740      | 805.3406         | 1608.6900      | 804.8486         | 13 |
| 4  | <b>522.2307</b>  | 261.6190        | 505.2041       | 253.1057         | 504.2201       | 252.6137         | D    | 1463.6372        | 732.3223        | 1446.6107      | 723.8090         | 1445.6267      | 723.3170         | 12 |
| 5  | <b>621.2991</b>  | 311.1532        | 604.2726       | 302.6399         | 603.2885       | 302.1479         | V    | 1348.6103        | 674.8088        | 1331.5837      | 666.2955         | 1330.5997      | 665.8035         | 11 |
| 6  | <b>768.3675</b>  | <b>384.6874</b> | 751.3410       | 376.1741         | 750.3569       | 375.6821         | F    | 1249.5419        | 625.2746        | 1232.5153      | 616.7613         | 1231.5313      | 616.2693         | 10 |
| 7  | <b>928.3982</b>  | 464.7027        | 911.3716       | 456.1894         | 910.3876       | 455.6974         | C    | <b>1102.4735</b> | 551.7404        | 1085.4469      | 543.2271         | 1084.4629      | 542.7351         | 9  |
| 8  | <b>1075.4666</b> | 538.2369        | 1058.4400      | 529.7237         | 1057.4560      | 529.2316         | F    | <b>942.4428</b>  | 471.7250        | 925.4163       | 463.2118         | 924.4322       | 462.7198         | 8  |
| 9  | 1176.5143        | 588.7608        | 1159.4877      | 580.2475         | 1158.5037      | 579.7555         | T    | <b>795.3744</b>  | 398.1908        | 778.3478       | 389.6776         | 777.3638       | 389.1856         | 7  |
| 10 | 1263.5463        | 632.2768        | 1246.5197      | 623.7635         | 1245.5357      | 623.2715         | S    | <b>694.3267</b>  | 347.6670        | 677.3002       | 339.1537         | 676.3161       | 338.6617         | 6  |
| 11 | 1377.5892        | 689.2982        | 1360.5627      | 680.7850         | 1359.5786      | 680.2930         | N    | <b>607.2947</b>  | 304.1510        | 590.2681       | 295.6377         |                |                  | 5  |
| 12 | 1524.6576        | 762.8325        | 1507.6311      | 754.3192         | 1506.6471      | 753.8272         | F    | <b>493.2518</b>  | 247.1295        | 476.2252       | 238.6162         |                |                  | 4  |
| 13 | 1638.7006        | 819.8539        | 1621.6740      | 811.3406         | 1620.6900      | 810.8486         | N    | <b>346.1833</b>  | 173.5953        | 329.1568       | 165.0820         |                |                  | 3  |
| 14 | 1695.7220        | 848.3646        | 1678.6955      | 839.8514         | 1677.7115      | 839.3594         | G    | 232.1404         | 116.5738        | 215.1139       | 108.0606         |                |                  | 2  |
| 15 |                  |                 |                |                  |                |                  | R    | 175.1190         | 88.0631         | 158.0924       | 79.5498          |                |                  | 1  |



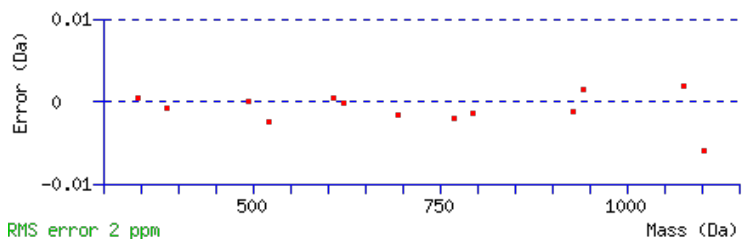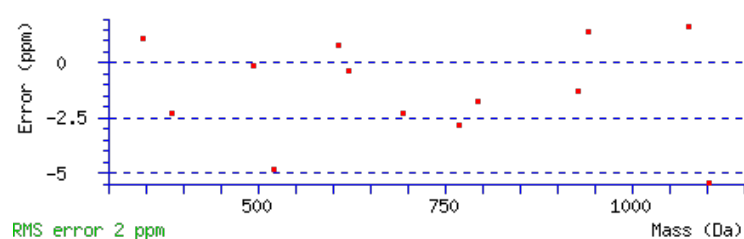

NCBI BLAST search of [SRYDVFCFTSNENGR](#)

(Parameters: blastp, nr protein database, expect=20000, no filter, PAM30)

Other BLAST [web gateways](#)

**All matches to this query**

| Score | Mr(calc)  | Delta  | Sequence                        |
|-------|-----------|--------|---------------------------------|
| 38.9  | 1868.8264 | 0.0007 | <a href="#">SRYDVFCFTSNENGR</a> |

Mascot: <http://www.matrixscience.com/>

# Mascot Search Results

## Peptide View

MS/MS Fragmentation of **YDVFCFTSNFNGR**

Found in **P10915** in **uni\_human\_nr**, HPLN1\_HUMAN Hyaluronan and proteoglycan link protein 1 OS=Homo sapiens GN=HAPLN1 PE=2 SV=2

Match to Query 4782: 1627.661588 from(814.838070,2+) intensity(362244.4375) rtinseconds(3026) scans(17353) index(13432)

Title: 130801\_HPL\_Human\_Plaque\_BR1\_TR1\_18\_Spectrum033083\_scans\_\_17353\_RTINSECONDS=3026

Data file E:\\RAW\\HumanPlaques\\mgf\\T\\1D\\T130801\_HPL\_Human\_Plaque\_BR1\_TR1\_18.mgf

Click mouse within plot area to zoom in by factor of two about that point

Or,  to  Da

Label all possible matches  Label matches used for scoring

Show Y-axis

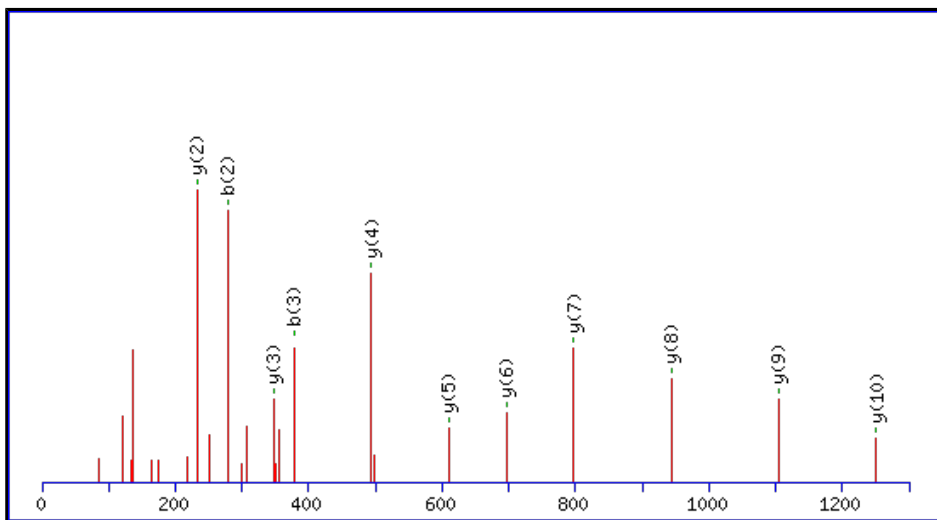

**Monoisotopic mass of neutral peptide Mr(calc):** 1627.6613

**Fixed modifications:** Carbamidomethyl (C) (apply to specified residues or termini only)

**Variable modifications:**

**N9** : Deamidated (NQ)

**N11** : Deamidated (NQ)

**Ions Score:** 82 **Expect:** 5.4e-008

**Matches** : 11/116 fragment ions using 14 most intense peaks ([help](#))

| #  | b               | b <sup>++</sup> | b <sup>*</sup> | b <sup>*++</sup> | b <sup>0</sup> | b <sup>0++</sup> | Seq. | y                | y <sup>++</sup> | y <sup>*</sup> | y <sup>*++</sup> | y <sup>0</sup> | y <sup>0++</sup> | #  |
|----|-----------------|-----------------|----------------|------------------|----------------|------------------|------|------------------|-----------------|----------------|------------------|----------------|------------------|----|
| 1  | 164.0706        | 82.5389         |                |                  |                |                  | Y    |                  |                 |                |                  |                |                  | 13 |
| 2  | <b>279.0975</b> | 140.0524        |                |                  | 261.0870       | 131.0471         | D    | 1465.6053        | 733.3063        | 1448.5787      | 724.7930         | 1447.5947      | 724.3010         | 12 |
| 3  | <b>378.1660</b> | 189.5866        |                |                  | 360.1554       | 180.5813         | V    | 1350.5783        | 675.7928        | 1333.5518      | 667.2795         | 1332.5677      | 666.7875         | 11 |
| 4  | 525.2344        | 263.1208        |                |                  | 507.2238       | 254.1155         | F    | <b>1251.5099</b> | 626.2586        | 1234.4834      | 617.7453         | 1233.4993      | 617.2533         | 10 |
| 5  | 685.2650        | 343.1362        |                |                  | 667.2545       | 334.1309         | C    | <b>1104.4415</b> | 552.7244        | 1087.4149      | 544.2111         | 1086.4309      | 543.7191         | 9  |
| 6  | 832.3334        | 416.6704        |                |                  | 814.3229       | 407.6651         | F    | <b>944.4108</b>  | 472.7091        | 927.3843       | 464.1958         | 926.4003       | 463.7038         | 8  |
| 7  | 933.3811        | 467.1942        |                |                  | 915.3706       | 458.1889         | T    | <b>797.3424</b>  | 399.1748        | 780.3159       | 390.6616         | 779.3319       | 390.1696         | 7  |
| 8  | 1020.4131       | 510.7102        |                |                  | 1002.4026      | 501.7049         | S    | <b>696.2947</b>  | 348.6510        | 679.2682       | 340.1377         | 678.2842       | 339.6457         | 6  |
| 9  | 1135.4401       | 568.2237        | 1118.4135      | 559.7104         | 1117.4295      | 559.2184         | N    | <b>609.2627</b>  | 305.1350        | 592.2362       | 296.6217         |                |                  | 5  |
| 10 | 1282.5085       | 641.7579        | 1265.4820      | 633.2446         | 1264.4979      | 632.7526         | F    | <b>494.2358</b>  | 247.6215        | 477.2092       | 239.1083         |                |                  | 4  |
| 11 | 1397.5354       | 699.2714        | 1380.5089      | 690.7581         | 1379.5249      | 690.2661         | N    | <b>347.1674</b>  | 174.0873        | 330.1408       | 165.5740         |                |                  | 3  |
| 12 | 1454.5569       | 727.7821        | 1437.5304      | 719.2688         | 1436.5463      | 718.7768         | G    | <b>232.1404</b>  | 116.5738        | 215.1139       | 108.0606         |                |                  | 2  |
| 13 |                 |                 |                |                  |                |                  | R    | 175.1190         | 88.0631         | 158.0924       | 79.5498          |                |                  | 1  |

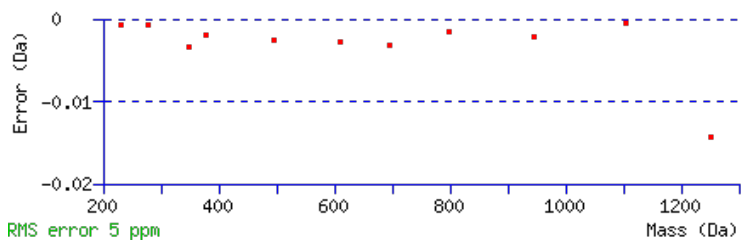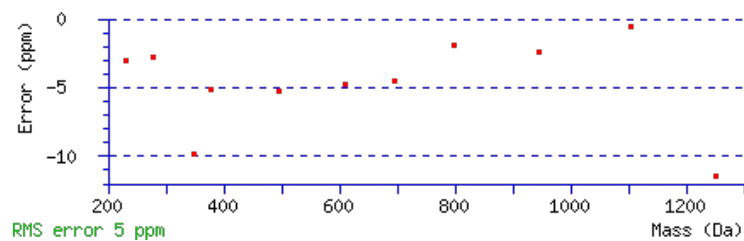

NCBI BLAST search of [YDVFCFTSNFNGR](#)

(Parameters: blastp, nr protein database, expect=20000, no filter, PAM30)

Other BLAST [web gateways](#)

**All matches to this query**

| Score | Mr(calc)  | Delta  | Sequence                      |
|-------|-----------|--------|-------------------------------|
| 82.0  | 1627.6613 | 0.0003 | <a href="#">YDVFCFTSNFNGR</a> |

Mascot: <http://www.matrixscience.com/>

# Mascot Search Results

## Peptide View

MS/MS Fragmentation of **YDVFCFTSNFNGR**

Found in **P10915** in **uni\_human\_nr**, HPLN1\_HUMAN Hyaluronan and proteoglycan link protein 1 OS=Homo sapiens GN=HAPLN1 PE=2 SV=2

Match to Query 4919: 1626.675508 from(814.345030,2+) intensity(1667035.3750) rtinseconds(2880) scans(17543) index(13927)

Title: 130801\_HPL\_Human\_Plaque\_BR2\_TR1\_05\_Spectrum035992\_scans\_\_17543\_RTINSECONDS=2880

Data file E:\RAW\HumanPlaques\mgf\T\1D\T130801\_HPL\_Human\_Plaque\_BR2\_TR1\_05.mgf

Click mouse within plot area to zoom in by factor of two about that point

Or,  to  Da

Label all possible matches  Label matches used for scoring

Show Y-axis

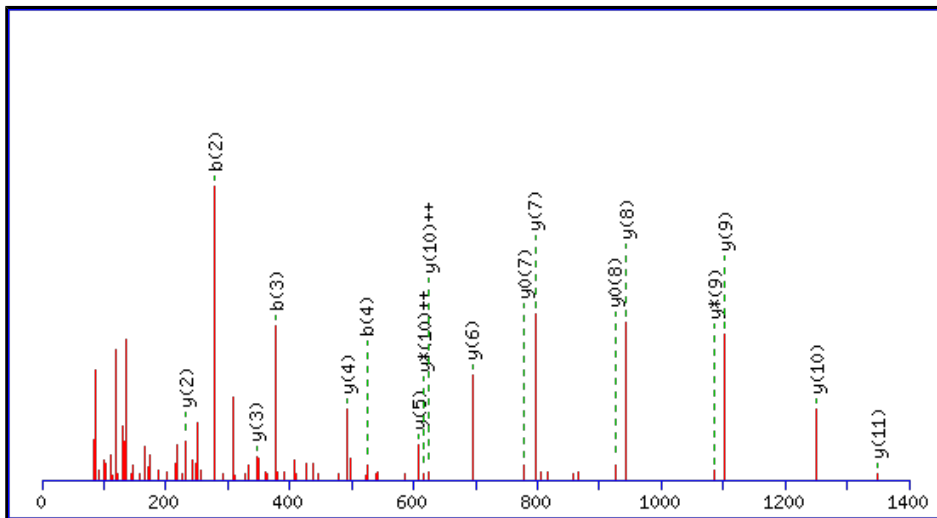

Monoisotopic mass of neutral peptide **Mr(calc):** 1626.6773

**Fixed modifications:** Carbamidomethyl (C) (apply to specified residues or termini only)

**Variable modifications:**

**N9** : Deamidated (NQ)

**Ions Score:** 75 **Expect:** 4.7e-007

**Matches :** 18/116 fragment ions using 30 most intense peaks ([help](#))

| #  | b               | b <sup>++</sup> | b <sup>*</sup> | b <sup>*++</sup> | b <sup>0</sup> | b <sup>0++</sup> | Seq. | y                | y <sup>++</sup> | y <sup>*</sup>   | y <sup>*++</sup> | y <sup>0</sup>  | y <sup>0++</sup> | #  |
|----|-----------------|-----------------|----------------|------------------|----------------|------------------|------|------------------|-----------------|------------------|------------------|-----------------|------------------|----|
| 1  | 164.0706        | 82.5389         |                |                  |                |                  | Y    |                  |                 |                  |                  |                 |                  | 13 |
| 2  | <b>279.0975</b> | 140.0524        |                |                  | 261.0870       | 131.0471         | D    | 1464.6212        | 732.8143        | 1447.5947        | 724.3010         | 1446.6107       | 723.8090         | 12 |
| 3  | <b>378.1660</b> | 189.5866        |                |                  | 360.1554       | 180.5813         | V    | <b>1349.5943</b> | 675.3008        | 1332.5677        | 666.7875         | 1331.5837       | 666.2955         | 11 |
| 4  | <b>525.2344</b> | 263.1208        |                |                  | 507.2238       | 254.1155         | F    | <b>1250.5259</b> | <b>625.7666</b> | 1233.4993        | <b>617.2533</b>  | 1232.5153       | 616.7613         | 10 |
| 5  | 685.2650        | 343.1362        |                |                  | 667.2545       | 334.1309         | C    | <b>1103.4575</b> | 552.2324        | <b>1086.4309</b> | 543.7191         | 1085.4469       | 543.2271         | 9  |
| 6  | 832.3334        | 416.6704        |                |                  | 814.3229       | 407.6651         | F    | <b>943.4268</b>  | 472.2170        | 926.4003         | 463.7038         | <b>925.4163</b> | 463.2118         | 8  |
| 7  | 933.3811        | 467.1942        |                |                  | 915.3706       | 458.1889         | T    | <b>796.3584</b>  | 398.6828        | 779.3319         | 390.1696         | <b>778.3478</b> | 389.6776         | 7  |
| 8  | 1020.4131       | 510.7102        |                |                  | 1002.4026      | 501.7049         | S    | <b>695.3107</b>  | 348.1590        | 678.2842         | 339.6457         | 677.3002        | 339.1537         | 6  |
| 9  | 1135.4401       | 568.2237        | 1118.4135      | 559.7104         | 1117.4295      | 559.2184         | N    | <b>608.2787</b>  | 304.6430        | 591.2522         | 296.1297         |                 |                  | 5  |
| 10 | 1282.5085       | 641.7579        | 1265.4820      | 633.2446         | 1264.4979      | 632.7526         | F    | <b>493.2518</b>  | 247.1295        | 476.2252         | 238.6162         |                 |                  | 4  |
| 11 | 1396.5514       | 698.7794        | 1379.5249      | 690.2661         | 1378.5409      | 689.7741         | N    | <b>346.1833</b>  | 173.5953        | 329.1568         | 165.0820         |                 |                  | 3  |
| 12 | 1453.5729       | 727.2901        | 1436.5463      | 718.7768         | 1435.5623      | 718.2848         | G    | <b>232.1404</b>  | 116.5738        | 215.1139         | 108.0606         |                 |                  | 2  |
| 13 |                 |                 |                |                  |                |                  | R    | 175.1190         | 88.0631         | 158.0924         | 79.5498          |                 |                  | 1  |

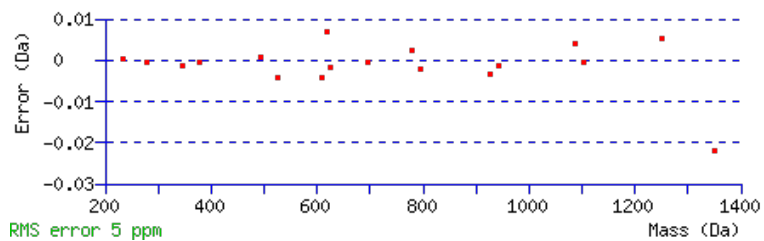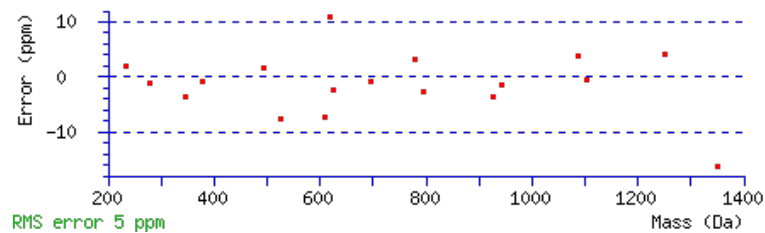

NCBI BLAST search of [YDVFCFTSNENGR](#)

(Parameters: blastp, nr protein database, expect=20000, no filter, PAM30)

Other BLAST [web gateways](#)

**All matches to this query**

| Score | Mr(calc)  | Delta   | Sequence                      | Site Analysis        |
|-------|-----------|---------|-------------------------------|----------------------|
| 74.5  | 1626.6773 | -0.0018 | <a href="#">YDVFCFTSNENGR</a> | Deamidated N9 98.79% |
| 55.4  | 1626.6773 | -0.0018 | <a href="#">YDVFCFTSNENGR</a> | Deamidated N11 1.21% |

Mascot: <http://www.matrixscience.com/>

# Mascot Search Results

## Peptide View

MS/MS Fragmentation of **YDVFCFTSNFNGRFYLIHPTK**

Found in **P10915** in **uni\_human\_nr**, HPLN1\_HUMAN Hyaluronan and proteoglycan link protein 1 OS=Homo sapiens GN=HAPLN1 PE=2 SV=2

Match to Query 16289: 2791.277296 from(698.826600,4+) intensity(1876208.0000) rtinseconds(3424) scans(23168) index(19046)

Title: 130801\_HPL\_Human\_Plaque\_BR1\_TR1\_02\_Spectrum043053\_scans\_23168\_RTINSECONDS=3424

Data file E:\\RAW\\HumanPlaques\\mgf\\T\\1D\\T130801\_HPL\_Human\_Plaque\_BR1\_TR1\_02.mgf

Click mouse within plot area to zoom in by factor of two about that point

Or, to Da

Label all possible matches Label matches used for scoring

Show Y-axis

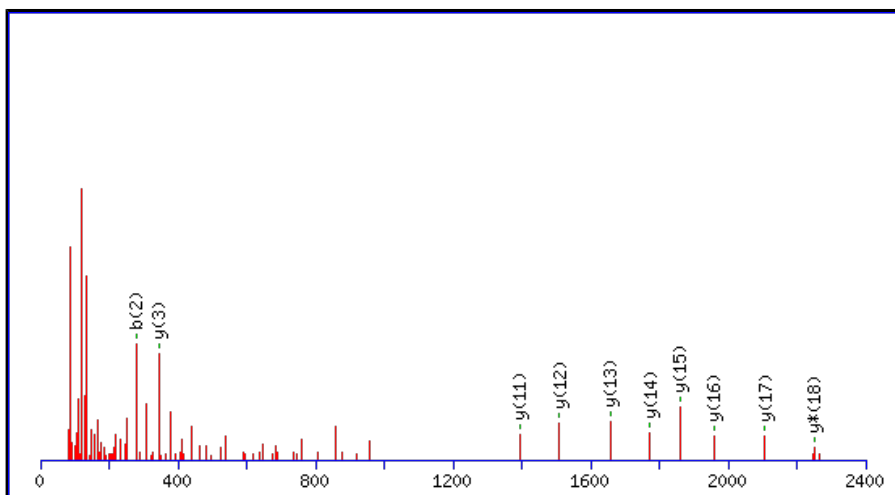

Monoisotopic mass of neutral peptide **Mr(calc): 2790.2788**

Fixed modifications: Carbamidomethyl (C) (apply to specified residues or termini only)

Variable modifications:

N9 : Deamidated (NQ)

N11 : Deamidated (NQ)

Ions Score: 43 Expect: 0.0036

Matches : 10/232 fragment ions using 17 most intense peaks ([help](#))

| #  | b               | b <sup>++</sup> | b <sup>*</sup> | b <sup>***</sup> | b <sup>0</sup> | b <sup>0++</sup> | Seq. | y                | y <sup>++</sup> | y <sup>*</sup>   | y <sup>***</sup> | y <sup>0</sup> | y <sup>0++</sup> | #  |
|----|-----------------|-----------------|----------------|------------------|----------------|------------------|------|------------------|-----------------|------------------|------------------|----------------|------------------|----|
| 1  | 164.0706        | 82.5389         |                |                  |                |                  | Y    |                  |                 |                  |                  |                |                  | 22 |
| 2  | <b>279.0975</b> | 140.0524        |                |                  | 261.0870       | 131.0471         | D    | 2628.2228        | 1314.6150       | 2611.1962        | 1306.1018        | 2610.2122      | 1305.6097        | 21 |
| 3  | 378.1660        | 189.5866        |                |                  | 360.1554       | 180.5813         | V    | 2513.1958        | 1257.1016       | 2496.1693        | 1248.5883        | 2495.1853      | 1248.0963        | 20 |
| 4  | 525.2344        | 263.1208        |                |                  | 507.2238       | 254.1155         | F    | 2414.1274        | 1207.5673       | 2397.1009        | 1199.0541        | 2396.1169      | 1198.5621        | 19 |
| 5  | 685.2650        | 343.1362        |                |                  | 667.2545       | 334.1309         | C    | 2267.0590        | 1134.0331       | <b>2250.0325</b> | 1125.5199        | 2249.0484      | 1125.0279        | 18 |
| 6  | 832.3334        | 416.6704        |                |                  | 814.3229       | 407.6651         | F    | <b>2107.0284</b> | 1054.0178       | 2090.0018        | 1045.5045        | 2089.0178      | 1045.0125        | 17 |
| 7  | 933.3811        | 467.1942        |                |                  | 915.3706       | 458.1889         | T    | <b>1959.9599</b> | 980.4836        | 1942.9334        | 971.9703         | 1941.9494      | 971.4783         | 16 |
| 8  | 1020.4131       | 510.7102        |                |                  | 1002.4026      | 501.7049         | S    | <b>1858.9123</b> | 929.9598        | 1841.8857        | 921.4465         | 1840.9017      | 920.9545         | 15 |
| 9  | 1135.4401       | 568.2237        | 1118.4135      | 559.7104         | 1117.4295      | 559.2184         | N    | <b>1771.8802</b> | 886.4438        | 1754.8537        | 877.9305         | 1753.8697      | 877.4385         | 14 |
| 10 | 1282.5085       | 641.7579        | 1265.4820      | 633.2446         | 1264.4979      | 632.7526         | F    | <b>1656.8533</b> | 828.9303        | 1639.8267        | 820.4170         | 1638.8427      | 819.9250         | 13 |
| 11 | 1397.5354       | 699.2714        | 1380.5089      | 690.7581         | 1379.5249      | 690.2661         | N    | <b>1509.7849</b> | 755.3961        | 1492.7583        | 746.8828         | 1491.7743      | 746.3908         | 12 |
| 12 | 1454.5569       | 727.7821        | 1437.5304      | 719.2688         | 1436.5463      | 718.7768         | G    | <b>1394.7579</b> | 697.8826        | 1377.7314        | 689.3693         | 1376.7474      | 688.8773         | 11 |
| 13 | 1610.6580       | 805.8326        | 1593.6315      | 797.3194         | 1592.6475      | 796.8274         | R    | 1337.7365        | 669.3719        | 1320.7099        | 660.8586         | 1319.7259      | 660.3666         | 10 |
| 14 | 1757.7264       | 879.3669        | 1740.6999      | 870.8536         | 1739.7159      | 870.3616         | F    | 1181.6354        | 591.3213        | 1164.6088        | 582.8080         | 1163.6248      | 582.3160         | 9  |
| 15 | 1920.7898       | 960.8985        | 1903.7632      | 952.3852         | 1902.7792      | 951.8932         | Y    | 1034.5669        | 517.7871        | 1017.5404        | 509.2738         | 1016.5564      | 508.7818         | 8  |
| 16 | 2083.8531       | 1042.4302       | 2066.8265      | 1033.9169        | 2065.8425      | 1033.4249        | Y    | 871.5036         | 436.2554        | 854.4771         | 427.7422         | 853.4931       | 427.2502         | 7  |
| 17 | 2196.9372       | 1098.9722       | 2179.9106      | 1090.4589        | 2178.9266      | 1089.9669        | L    | 708.4403         | 354.7238        | 691.4137         | 346.2105         | 690.4297       | 345.7185         | 6  |

|    |           |           |           |           |           |           |   |          |          |          |          |          |          |   |
|----|-----------|-----------|-----------|-----------|-----------|-----------|---|----------|----------|----------|----------|----------|----------|---|
| 18 | 2310.0212 | 1155.5142 | 2292.9947 | 1147.0010 | 2292.0107 | 1146.5090 | I | 595.3562 | 298.1817 | 578.3297 | 289.6685 | 577.3457 | 289.1765 | 5 |
| 19 | 2447.0801 | 1224.0437 | 2430.0536 | 1215.5304 | 2429.0696 | 1215.0384 | H | 482.2722 | 241.6397 | 465.2456 | 233.1264 | 464.2616 | 232.6344 | 4 |
| 20 | 2544.1329 | 1272.5701 | 2527.1063 | 1264.0568 | 2526.1223 | 1263.5648 | P | 345.2132 | 173.1103 | 328.1867 | 164.5970 | 327.2027 | 164.1050 | 3 |
| 21 | 2645.1806 | 1323.0939 | 2628.1540 | 1314.5807 | 2627.1700 | 1314.0886 | T | 248.1605 | 124.5839 | 231.1339 | 116.0706 | 230.1499 | 115.5786 | 2 |
| 22 |           |           |           |           |           |           | K | 147.1128 | 74.0600  | 130.0863 | 65.5468  |          |          | 1 |

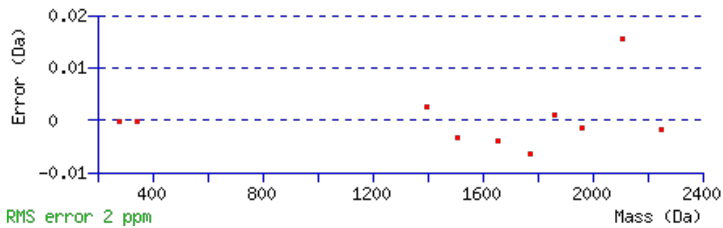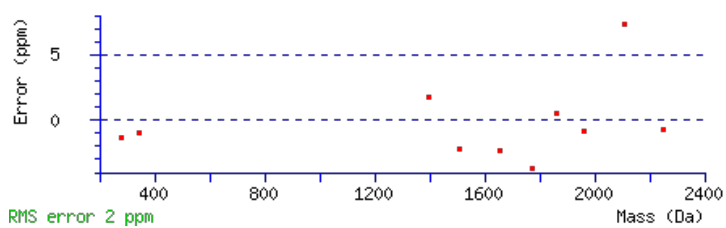

NCBI **BLAST** search of [YDVFCFTSNENGRFYLIHPTK](#)  
 (Parameters: blastp, nr protein database, expect=20000, no filter, PAM30)

Other BLAST [web gateways](#)

**All matches to this query**

| Score | Mr(calc)  | Delta  | Sequence                              |
|-------|-----------|--------|---------------------------------------|
| 42.6  | 2790.2788 | 0.9985 | <a href="#">YDVFCFTSNENGRFYLIHPTK</a> |

Mascot: <http://www.matrixscience.com/>

# Mascot Search Results

## Peptide View

MS/MS Fragmentation of **LLQDFFNGR**

Found in **P0DMV8** in **uni\_human\_nr**, HS71A\_HUMAN Heat shock 70 kDa protein 1A OS=Homo sapiens GN=HSPA1A PE=1 SV=1

Match to Query 1104: 1109.551248 from(555.782900,2+) intensity(488457.7500) rtinseconds(2446) scans(14245) index(10984)  
 Title: 130801\_HPL\_Human\_Plaque\_BR2\_TR1\_06\_Spectrum032478\_scans\_\_14245\_RTINSECONDS=2446  
 Data file E:\\RAW\\HumanPlaques\\mgf\\T\\1D\\T130801\_HPL\_Human\_Plaque\_BR2\_TR1\_06.mgf

Click mouse within plot area to zoom in by factor of two about that point

Or,  to  Da  
 Label all possible matches  Label matches used for scoring   
 Show Y-axis

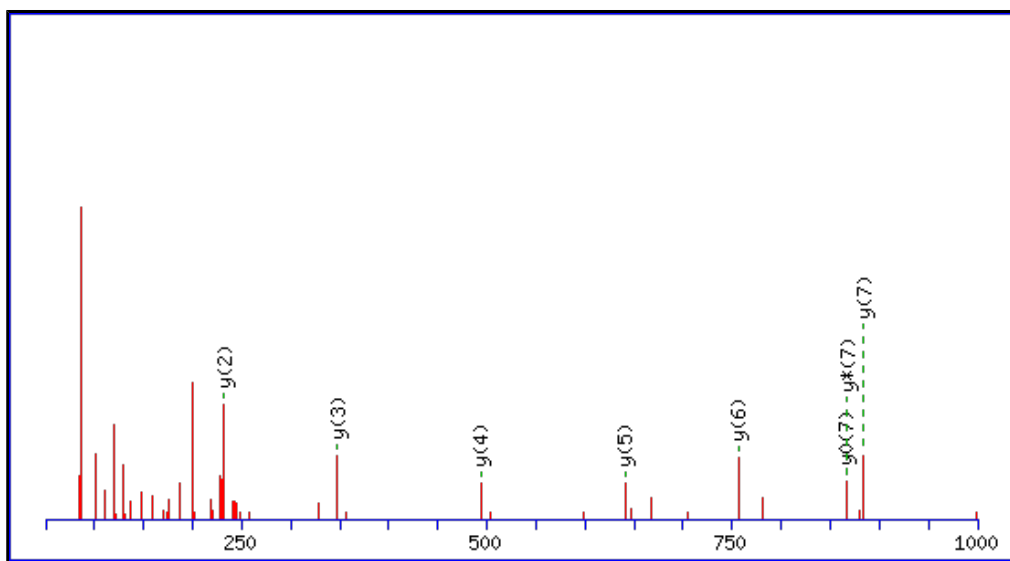

Monoisotopic mass of neutral peptide **Mr(calc):** 1109.5506  
**Fixed modifications:** Carbamidomethyl (C) (apply to specified residues or termini only)  
**Variable modifications:**  
 N7 : Deamidated (NQ)  
**Ions Score:** 36 **Expect:** 0.012  
**Matches :** 8/76 fragment ions using 16 most intense peaks ([help](#))

| # | b        | b <sup>++</sup> | b <sup>*</sup> | b <sup>*++</sup> | b <sup>0</sup> | b <sup>0++</sup> | Seq. | y        | y <sup>++</sup> | y <sup>*</sup> | y <sup>*++</sup> | y <sup>0</sup> | y <sup>0++</sup> | # |
|---|----------|-----------------|----------------|------------------|----------------|------------------|------|----------|-----------------|----------------|------------------|----------------|------------------|---|
| 1 | 114.0913 | 57.5493         |                |                  |                |                  | L    |          |                 |                |                  |                |                  | 9 |
| 2 | 227.1754 | 114.0913        |                |                  |                |                  | L    | 997.4738 | 499.2405        | 980.4472       | 490.7272         | 979.4632       | 490.2352         | 8 |
| 3 | 355.2340 | 178.1206        | 338.2074       | 169.6074         |                |                  | Q    | 884.3897 | 442.6985        | 867.3632       | 434.1852         | 866.3791       | 433.6932         | 7 |
| 4 | 470.2609 | 235.6341        | 453.2344       | 227.1208         | 452.2504       | 226.6288         | D    | 756.3311 | 378.6692        | 739.3046       | 370.1559         | 738.3206       | 369.6639         | 6 |
| 5 | 617.3293 | 309.1683        | 600.3028       | 300.6550         | 599.3188       | 300.1630         | F    | 641.3042 | 321.1557        | 624.2776       | 312.6425         |                |                  | 5 |
| 6 | 764.3978 | 382.7025        | 747.3712       | 374.1892         | 746.3872       | 373.6972         | F    | 494.2358 | 247.6215        | 477.2092       | 239.1083         |                |                  | 4 |
| 7 | 879.4247 | 440.2160        | 862.3981       | 431.7027         | 861.4141       | 431.2107         | N    | 347.1674 | 174.0873        | 330.1408       | 165.5740         |                |                  | 3 |
| 8 | 936.4462 | 468.7267        | 919.4196       | 460.2134         | 918.4356       | 459.7214         | G    | 232.1404 | 116.5738        | 215.1139       | 108.0606         |                |                  | 2 |
| 9 |          |                 |                |                  |                |                  | R    | 175.1190 | 88.0631         | 158.0924       | 79.5498          |                |                  | 1 |



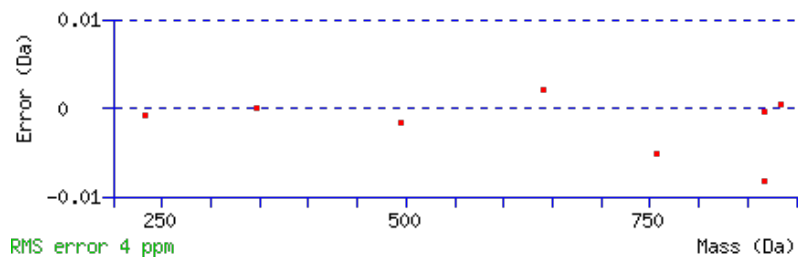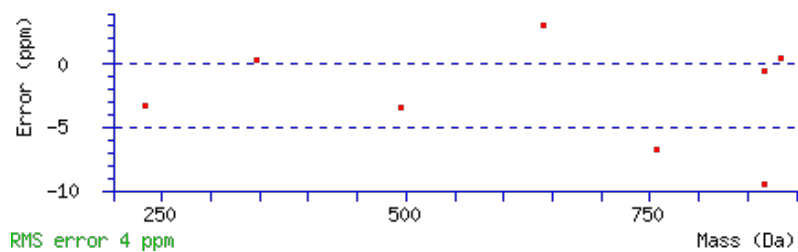

NCBI **BLAST** search of [LLQDFENGR](#)

(Parameters: blastp, nr protein database, expect=20000, no filter, PAM30)

Other BLAST [web gateways](#)

**All matches to this query**

| Score | Mr(calc)  | Delta  | Sequence                  |
|-------|-----------|--------|---------------------------|
| 36.2  | 1109.5506 | 0.0007 | <a href="#">LLQDFENGR</a> |
| 4.3   | 1107.5448 | 2.0065 | <a href="#">KEDLEFQAK</a> |

**Mascot:** <http://www.matrixscience.com/>

# Mascot Search Results

## Peptide View

MS/MS Fragmentation of **LLQDFFNGR**

Found in **P0DMV8** in **uni\_human\_nr**, HS71A\_HUMAN Heat shock 70 kDa protein 1A OS=Homo sapiens GN=HSPA1A PE=1 SV=1

Match to Query 1262: 1108.567608 from(555.291080,2+) intensity(19745542.0000) rtinseconds(2229) scans(14416) index(11494)  
 Title: 130809\_HPL\_Human\_Plaque\_BR1\_TR3\_02\_Spectrum036020\_scans\_\_14416\_RTINSECONDS=2229  
 Data file E:\\RAW\\HumanPlaques\\mgf\\T\\1D\\T130809\_HPL\_Human\_Plaque\_BR1\_TR3\_02.mgf

Click mouse within plot area to zoom in by factor of two about that point

Or,  to  Da  
 Label all possible matches  Label matches used for scoring   
 Show Y-axis

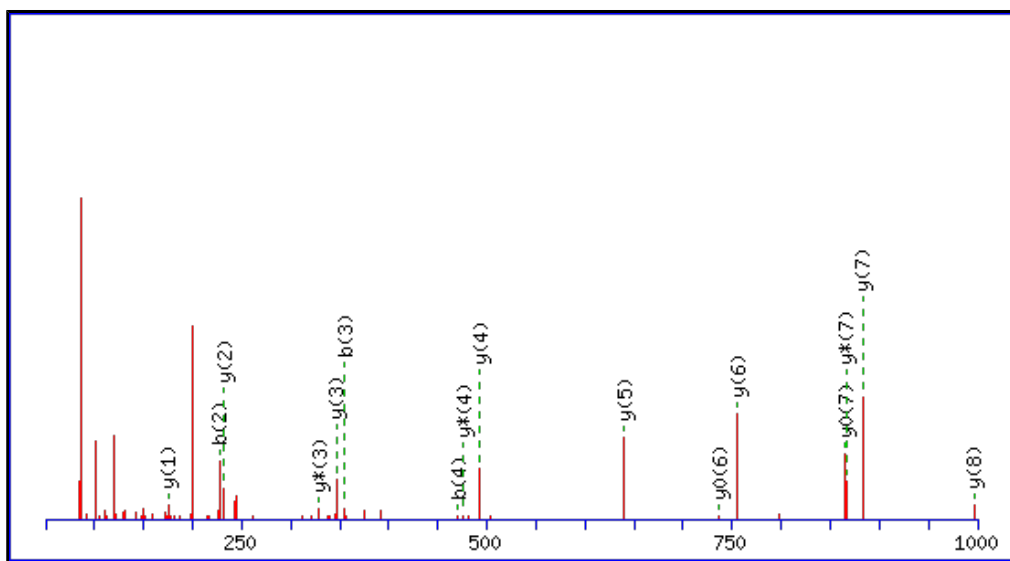

Monoisotopic mass of neutral peptide **Mr(calc):** 1108.5665  
**Fixed modifications:** Carbamidomethyl (C) (apply to specified residues or termini only)  
**Ions Score:** 61 **Expect:** 4.5e-005  
**Matches :** 16/76 fragment ions using 30 most intense peaks ([help](#))

| # | b               | b <sup>++</sup> | b*       | b <sup>+++</sup> | b <sup>0</sup> | b <sup>0++</sup> | Seq. | y               | y <sup>++</sup> | y*              | y <sup>+++</sup> | y <sup>0</sup>  | y <sup>0++</sup> | # |
|---|-----------------|-----------------|----------|------------------|----------------|------------------|------|-----------------|-----------------|-----------------|------------------|-----------------|------------------|---|
| 1 | 114.0913        | 57.5493         |          |                  |                |                  | L    |                 |                 |                 |                  |                 |                  | 9 |
| 2 | <b>227.1754</b> | 114.0913        |          |                  |                |                  | L    | <b>996.4898</b> | 498.7485        | 979.4632        | 490.2352         | 978.4792        | 489.7432         | 8 |
| 3 | <b>355.2340</b> | 178.1206        | 338.2074 | 169.6074         |                |                  | Q    | <b>883.4057</b> | 442.2065        | <b>866.3791</b> | 433.6932         | <b>865.3951</b> | 433.2012         | 7 |
| 4 | <b>470.2609</b> | 235.6341        | 453.2344 | 227.1208         | 452.2504       | 226.6288         | D    | <b>755.3471</b> | 378.1772        | 738.3206        | 369.6639         | <b>737.3365</b> | 369.1719         | 6 |
| 5 | 617.3293        | 309.1683        | 600.3028 | 300.6550         | 599.3188       | 300.1630         | F    | <b>640.3202</b> | 320.6637        | 623.2936        | 312.1504         |                 |                  | 5 |
| 6 | 764.3978        | 382.7025        | 747.3712 | 374.1892         | 746.3872       | 373.6972         | F    | <b>493.2518</b> | 247.1295        | <b>476.2252</b> | 238.6162         |                 |                  | 4 |
| 7 | 878.4407        | 439.7240        | 861.4141 | 431.2107         | 860.4301       | 430.7187         | N    | <b>346.1833</b> | 173.5953        | <b>329.1568</b> | 165.0820         |                 |                  | 3 |
| 8 | 935.4621        | 468.2347        | 918.4356 | 459.7214         | 917.4516       | 459.2294         | G    | <b>232.1404</b> | 116.5738        | 215.1139        | 108.0606         |                 |                  | 2 |
| 9 |                 |                 |          |                  |                |                  | R    | <b>175.1190</b> | 88.0631         | 158.0924        | 79.5498          |                 |                  | 1 |

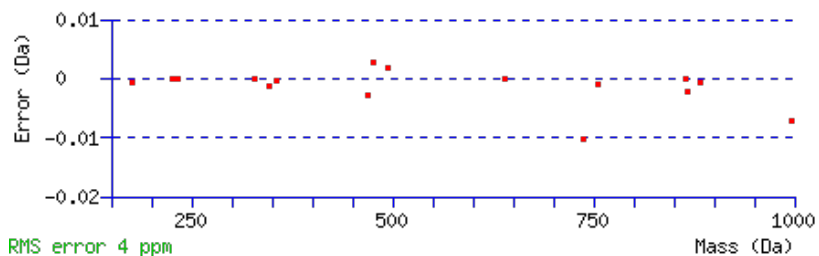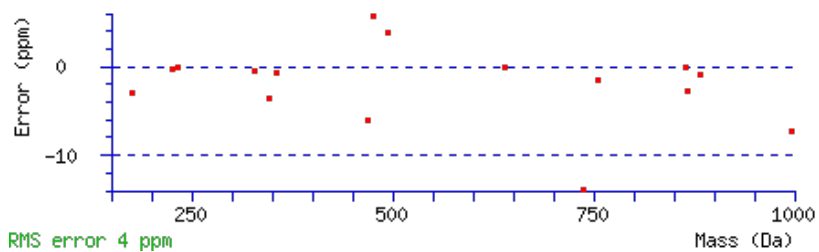

NCBI **BLAST** search of [LLODFEENGR](#)

(Parameters: blastp, nr protein database, expect=20000, no filter, PAM30)

Other BLAST [web gateways](#)

**All matches to this query**

| Score | Mr(calc)  | Delta   | Sequence                   |
|-------|-----------|---------|----------------------------|
| 61.5  | 1108.5665 | 0.0011  | <a href="#">LLODFEENGR</a> |
| 11.7  | 1108.5625 | 0.0051  | <a href="#">ILAGQHEDAR</a> |
| 10.7  | 1108.5733 | -0.0056 | <a href="#">IKNNTAMMR</a>  |
| 5.8   | 1108.5659 | 0.0017  | <a href="#">LSRLMSGSSR</a> |
| 5.5   | 1106.5556 | 2.0120  | <a href="#">CGKFERHR</a>   |
| 2.2   | 1108.5699 | -0.0023 | <a href="#">ILNKYGDMR</a>  |
| 2.2   | 1108.5699 | -0.0023 | <a href="#">ILREMYER</a>   |
| 1.3   | 1106.5650 | 2.0026  | <a href="#">LGLICMCLK</a>  |

Mascot: <http://www.matrixscience.com/>

# Mascot Search Results

## Peptide View

MS/MS Fragmentation of **LLQDFFN<sup>Q</sup>GRDLNK**

Found in **P0DMV8** in **uni\_human\_nr**, HS71A\_HUMAN Heat shock 70 kDa protein 1A OS=Homo sapiens GN=HSPA1A PE=1 SV=1

Match to Query 3788: 1582.763802 from(528.595210,3+) intensity(202067.5781) rtinseconds(1924) scans(10132) index(7344)

Title: 130806\_HPL\_Human\_Plaque\_BR2\_TR2\_13\_Spectrum027977\_scans\_\_10132\_RTINSECONDS=1924

Data file E:\RAW\HumanPlaques\mgf\T\1D\T130806\_HPL\_Human\_Plaque\_BR2\_TR2\_13.mgf

Click mouse within plot area to zoom in by factor of two about that point

Or,  to  Da

Label all possible matches  Label matches used for scoring

Show Y-axis

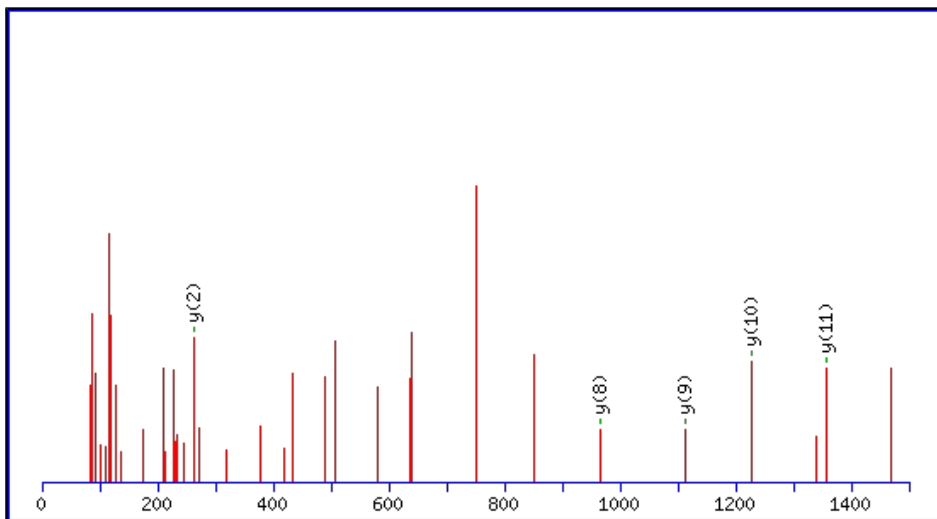

Monoisotopic mass of neutral peptide **Mr(calc):** 1581.7675

**Fixed modifications:** Carbamidomethyl (C) (apply to specified residues or termini only)

**Variable modifications:**

**Q3** : Deamidated (NQ)

**N7** : Deamidated (NQ)

**N12** : Deamidated (NQ)

**Ions Score:** 17 **Expect:** 1.3

**Matches :** 5/128 fragment ions using 13 most intense peaks ([help](#))

| #  | b         | b <sup>++</sup> | b <sup>*</sup> | b <sup>*++</sup> | b <sup>0</sup> | b <sup>0++</sup> | Seq. | y                | y <sup>++</sup> | y <sup>*</sup> | y <sup>*++</sup> | y <sup>0</sup> | y <sup>0++</sup> | #  |
|----|-----------|-----------------|----------------|------------------|----------------|------------------|------|------------------|-----------------|----------------|------------------|----------------|------------------|----|
| 1  | 114.0913  | 57.5493         |                |                  |                |                  | L    |                  |                 |                |                  |                |                  | 13 |
| 2  | 227.1754  | 114.0913        |                |                  |                |                  | L    | 1469.6907        | 735.3490        | 1452.6642      | 726.8357         | 1451.6801      | 726.3437         | 12 |
| 3  | 356.2180  | 178.6126        | 339.1914       | 170.0994         |                |                  | Q    | <b>1356.6066</b> | 678.8070        | 1339.5801      | 670.2937         | 1338.5961      | 669.8017         | 11 |
| 4  | 471.2449  | 236.1261        | 454.2184       | 227.6128         | 453.2344       | 227.1208         | D    | <b>1227.5640</b> | 614.2857        | 1210.5375      | 605.7724         | 1209.5535      | 605.2804         | 10 |
| 5  | 618.3134  | 309.6603        | 601.2868       | 301.1470         | 600.3028       | 300.6550         | F    | <b>1112.5371</b> | 556.7722        | 1095.5106      | 548.2589         | 1094.5265      | 547.7669         | 9  |
| 6  | 765.3818  | 383.1945        | 748.3552       | 374.6812         | 747.3712       | 374.1892         | F    | <b>965.4687</b>  | 483.2380        | 948.4421       | 474.7247         | 947.4581       | 474.2327         | 8  |
| 7  | 880.4087  | 440.7080        | 863.3822       | 432.1947         | 862.3981       | 431.7027         | N    | 818.4003         | 409.7038        | 801.3737       | 401.1905         | 800.3897       | 400.6985         | 7  |
| 8  | 937.4302  | 469.2187        | 920.4036       | 460.7055         | 919.4196       | 460.2134         | G    | 703.3733         | 352.1903        | 686.3468       | 343.6770         | 685.3628       | 343.1850         | 6  |
| 9  | 1093.5313 | 547.2693        | 1076.5047      | 538.7560         | 1075.5207      | 538.2640         | R    | 646.3519         | 323.6796        | 629.3253       | 315.1663         | 628.3413       | 314.6743         | 5  |
| 10 | 1208.5582 | 604.7828        | 1191.5317      | 596.2695         | 1190.5477      | 595.7775         | D    | 490.2508         | 245.6290        | 473.2242       | 237.1157         | 472.2402       | 236.6237         | 4  |
| 11 | 1321.6423 | 661.3248        | 1304.6157      | 652.8115         | 1303.6317      | 652.3195         | L    | 375.2238         | 188.1155        | 358.1973       | 179.6023         |                |                  | 3  |
| 12 | 1436.6692 | 718.8383        | 1419.6427      | 710.3250         | 1418.6587      | 709.8330         | N    | <b>262.1397</b>  | 131.5735        | 245.1132       | 123.0602         |                |                  | 2  |
| 13 |           |                 |                |                  |                |                  | K    | 147.1128         | 74.0600         | 130.0863       | 65.5468          |                |                  | 1  |

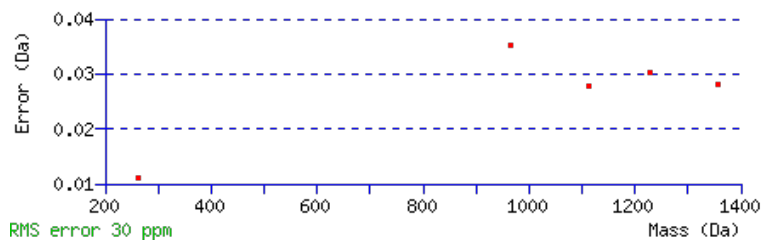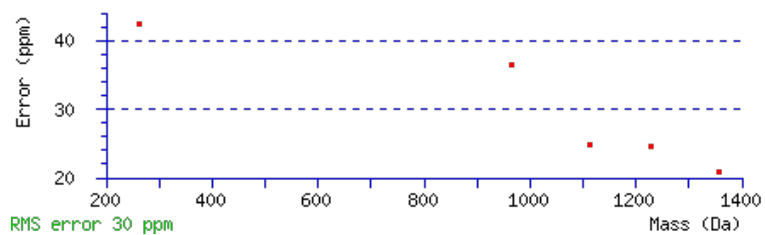

NCBI BLAST search of [LLQDFENGRDLNK](#)

(Parameters: blastp, nr protein database, expect=20000, no filter, PAM30)

Other BLAST [web gateways](#)

**All matches to this query**

| Score | Mr(calc)  | Delta  | Sequence                       |
|-------|-----------|--------|--------------------------------|
| 16.9  | 1581.7675 | 0.9963 | <a href="#">LLQDFENGRDLNK</a>  |
| 0.1   | 1580.7583 | 2.0055 | <a href="#">PQTGANLFFGTGTR</a> |
| 0.1   | 1580.7583 | 2.0055 | <a href="#">PQTGANLFFGTGTR</a> |

Mascot: <http://www.matrixscience.com/>

# Mascot Search Results

## Peptide View

MS/MS Fragmentation of **LLQDFFNGRDLNK**

Found in **P0DMV8** in **uni\_human\_nr**, HS71A\_HUMAN Heat shock 70 kDa protein 1A OS=Homo sapiens GN=HSPA1A PE=1 SV=1

Match to Query 3943: 1580.781882 from(527.934570,3+) intensity(152219.7031) rtinseconds(2480) scans(14092) index(10686)

Title: 130806\_HPL\_Human\_Plaque\_BR2\_TR2\_10\_Spectrum031607\_scans\_\_14092\_RTINSECONDS=2480

Data file E:\RAW\HumanPlaques\mgf\T\1D\T130806\_HPL\_Human\_Plaque\_BR2\_TR2\_10.mgf

Click mouse within plot area to zoom in by factor of two about that point

Or,  to  Da

Label all possible matches  Label matches used for scoring

Show Y-axis

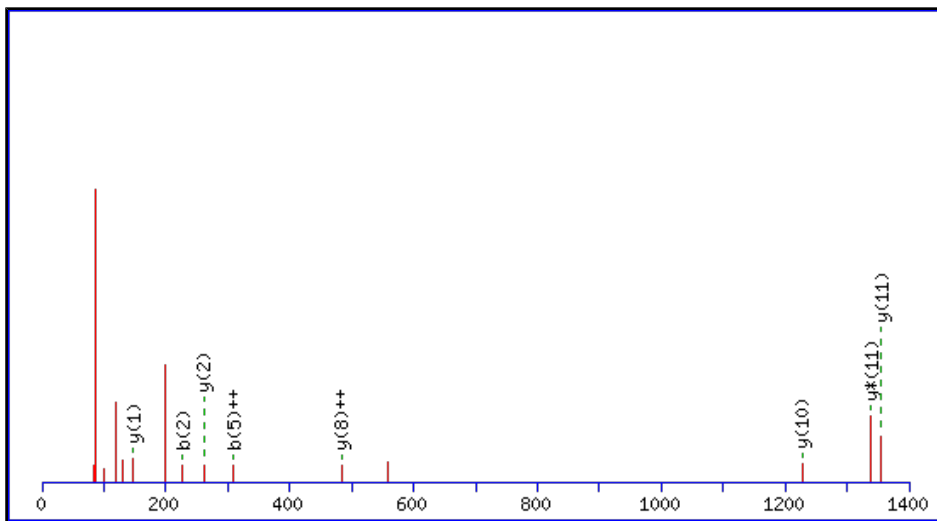

Monoisotopic mass of neutral peptide Mr(calc): 1580.7834

Fixed modifications: Carbamidomethyl (C) (apply to specified residues or termini only)

Variable modifications:

N7 : Deamidated (NQ)

N12 : Deamidated (NQ)

Ions Score: 20 Expect: 0.7

Matches : 8/128 fragment ions using 12 most intense peaks ([help](#))

| #  | b               | b <sup>++</sup> | b <sup>*</sup> | b <sup>*++</sup> | b <sup>0</sup> | b <sup>0++</sup> | Seq. | y                | y <sup>++</sup> | y <sup>*</sup>   | y <sup>*++</sup> | y <sup>0</sup> | y <sup>0++</sup> | #  |
|----|-----------------|-----------------|----------------|------------------|----------------|------------------|------|------------------|-----------------|------------------|------------------|----------------|------------------|----|
| 1  | 114.0913        | 57.5493         |                |                  |                |                  | L    |                  |                 |                  |                  |                |                  | 13 |
| 2  | <b>227.1754</b> | 114.0913        |                |                  |                |                  | L    | 1468.7067        | 734.8570        | 1451.6801        | 726.3437         | 1450.6961      | 725.8517         | 12 |
| 3  | 355.2340        | 178.1206        | 338.2074       | 169.6074         |                |                  | Q    | <b>1355.6226</b> | 678.3149        | <b>1338.5961</b> | 669.8017         | 1337.6121      | 669.3097         | 11 |
| 4  | 470.2609        | 235.6341        | 453.2344       | 227.1208         | 452.2504       | 226.6288         | D    | <b>1227.5640</b> | 614.2857        | 1210.5375        | 605.7724         | 1209.5535      | 605.2804         | 10 |
| 5  | 617.3293        | <b>309.1683</b> | 600.3028       | 300.6550         | 599.3188       | 300.1630         | F    | 1112.5371        | 556.7722        | 1095.5106        | 548.2589         | 1094.5265      | 547.7669         | 9  |
| 6  | 764.3978        | 382.7025        | 747.3712       | 374.1892         | 746.3872       | 373.6972         | F    | 965.4687         | <b>483.2380</b> | 948.4421         | 474.7247         | 947.4581       | 474.2327         | 8  |
| 7  | 879.4247        | 440.2160        | 862.3981       | 431.7027         | 861.4141       | 431.2107         | N    | 818.4003         | 409.7038        | 801.3737         | 401.1905         | 800.3897       | 400.6985         | 7  |
| 8  | 936.4462        | 468.7267        | 919.4196       | 460.2134         | 918.4356       | 459.7214         | G    | 703.3733         | 352.1903        | 686.3468         | 343.6770         | 685.3628       | 343.1850         | 6  |
| 9  | 1092.5473       | 546.7773        | 1075.5207      | 538.2640         | 1074.5367      | 537.7720         | R    | 646.3519         | 323.6796        | 629.3253         | 315.1663         | 628.3413       | 314.6743         | 5  |
| 10 | 1207.5742       | 604.2907        | 1190.5477      | 595.7775         | 1189.5636      | 595.2855         | D    | 490.2508         | 245.6290        | 473.2242         | 237.1157         | 472.2402       | 236.6237         | 4  |
| 11 | 1320.6583       | 660.8328        | 1303.6317      | 652.3195         | 1302.6477      | 651.8275         | L    | 375.2238         | 188.1155        | 358.1973         | 179.6023         |                |                  | 3  |
| 12 | 1435.6852       | 718.3462        | 1418.6587      | 709.8330         | 1417.6747      | 709.3410         | N    | <b>262.1397</b>  | 131.5735        | 245.1132         | 123.0602         |                |                  | 2  |
| 13 |                 |                 |                |                  |                |                  | K    | <b>147.1128</b>  | 74.0600         | 130.0863         | 65.5468          |                |                  | 1  |

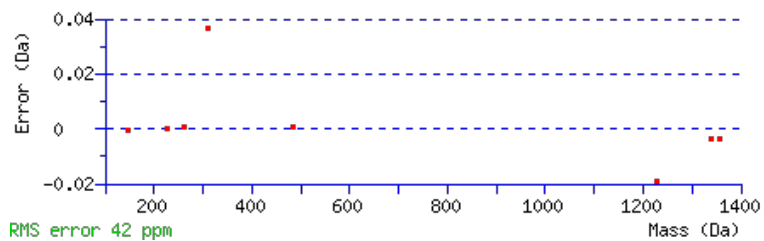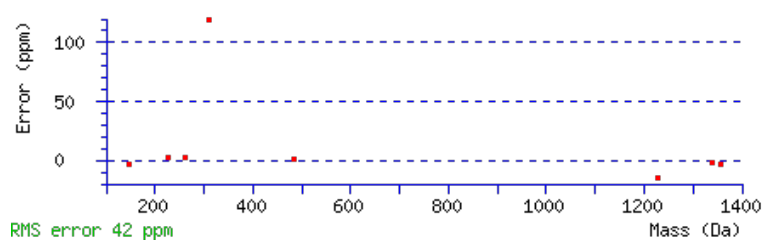

NCBI BLAST search of [LLQDFENGRDLNK](#)

(Parameters: blastp, nr protein database, expect=20000, no filter, PAM30)

Other BLAST [web gateways](#)

**All matches to this query**

| Score | Mr(calc)  | Delta   | Sequence                         |
|-------|-----------|---------|----------------------------------|
| 20.2  | 1580.7834 | -0.0016 | <a href="#">LLQDFENGRDLNK</a>    |
| 6.8   | 1580.7834 | -0.0016 | <a href="#">LLQDFENGRDLNK</a>    |
| 2.8   | 1580.7769 | 0.0050  | <a href="#">LGFPGARDLANMFR</a>   |
| 2.7   | 1579.7803 | 1.0016  | <a href="#">MPQLLSVYLEENK</a>    |
| 2.0   | 1578.7777 | 2.0042  | <a href="#">AVAGEYSDPVTLETK</a>  |
| 1.4   | 1579.7842 | 0.9977  | <a href="#">IGSLDNITHVPGGGNK</a> |

Mascot: <http://www.matrixscience.com/>

# Mascot Search Results

## Peptide View

MS/MS Fragmentation of **LLQDFFNGRDLNK**

Found in **P0DMV8** in **uni\_human\_nr**, HS71A\_HUMAN Heat shock 70 kDa protein 1A OS=Homo sapiens GN=HSPA1A PE=1 SV=1

Match to Query 4257: 1579.798962 from(527.606930,3+) intensity(2126163.0000) rtinseconds(2356) scans(14112) index(11024)

Title: 130801\_HPL\_Human\_Plaque\_BR1\_TR1\_05\_Spectrum033530\_scans\_\_14112\_RTINSECONDS=2356

Data file E:\RAW\HumanPlaques\mgf\T\1D\T130801\_HPL\_Human\_Plaque\_BR1\_TR1\_05.mgf

Click mouse within plot area to zoom in by factor of two about that point

Or,  to  Da

Label all possible matches  Label matches used for scoring

Show Y-axis

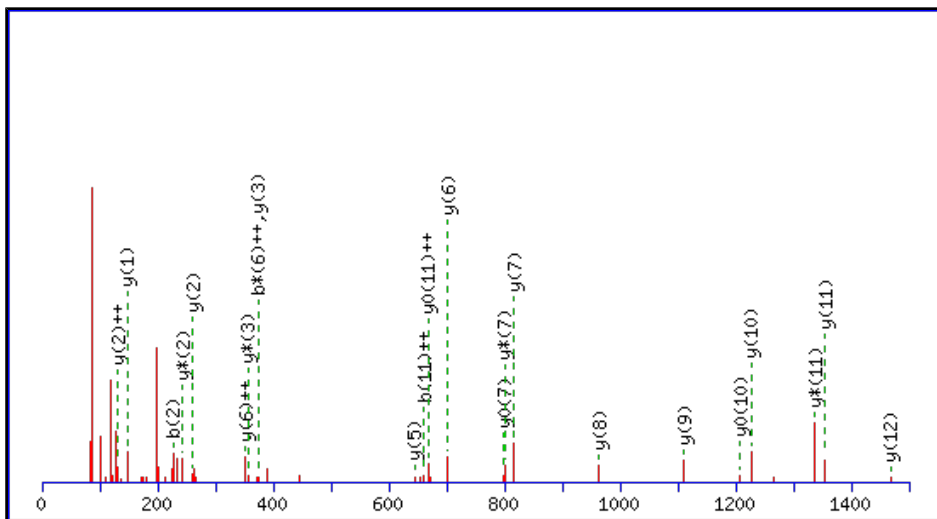

**Monoisotopic mass of neutral peptide Mr(calc):** 1579.7994

**Fixed modifications:** Carbamidomethyl (C) (apply to specified residues or termini only)

**Variable modifications:**

N7 : Deamidated (NQ)

**Ions Score:** 76 **Expect:** 1.7e-006

**Matches :** 23/128 fragment ions using 42 most intense peaks ([help](#))

| #  | b               | b <sup>++</sup> | b <sup>*</sup> | b <sup>*++</sup> | b <sup>0</sup> | b <sup>0++</sup> | Seq. | y                | y <sup>++</sup> | y <sup>*</sup>   | y <sup>*++</sup> | y <sup>0</sup>   | y <sup>0++</sup> | #  |
|----|-----------------|-----------------|----------------|------------------|----------------|------------------|------|------------------|-----------------|------------------|------------------|------------------|------------------|----|
| 1  | 114.0913        | 57.5493         |                |                  |                |                  | L    |                  |                 |                  |                  |                  |                  | 13 |
| 2  | <b>227.1754</b> | 114.0913        |                |                  |                |                  | L    | <b>1467.7227</b> | 734.3650        | 1450.6961        | 725.8517         | 1449.7121        | 725.3597         | 12 |
| 3  | 355.2340        | 178.1206        | 338.2074       | 169.6074         |                |                  | Q    | <b>1354.6386</b> | 677.8229        | <b>1337.6121</b> | 669.3097         | 1336.6280        | <b>668.8177</b>  | 11 |
| 4  | 470.2609        | 235.6341        | 453.2344       | 227.1208         | 452.2504       | 226.6288         | D    | <b>1226.5800</b> | 613.7937        | 1209.5535        | 605.2804         | <b>1208.5695</b> | 604.7884         | 10 |
| 5  | 617.3293        | 309.1683        | 600.3028       | 300.6550         | 599.3188       | 300.1630         | F    | <b>1111.5531</b> | 556.2802        | 1094.5265        | 547.7669         | 1093.5425        | 547.2749         | 9  |
| 6  | 764.3978        | 382.7025        | 747.3712       | <b>374.1892</b>  | 746.3872       | 373.6972         | F    | <b>964.4847</b>  | 482.7460        | 947.4581         | 474.2327         | 946.4741         | 473.7407         | 8  |
| 7  | 879.4247        | 440.2160        | 862.3981       | 431.7027         | 861.4141       | 431.2107         | N    | <b>817.4163</b>  | 409.2118        | <b>800.3897</b>  | 400.6985         | <b>799.4057</b>  | 400.2065         | 7  |
| 8  | 936.4462        | 468.7267        | 919.4196       | 460.2134         | 918.4356       | 459.7214         | G    | <b>702.3893</b>  | <b>351.6983</b> | 685.3628         | 343.1850         | 684.3787         | 342.6930         | 6  |
| 9  | 1092.5473       | 546.7773        | 1075.5207      | 538.2640         | 1074.5367      | 537.7720         | R    | <b>645.3678</b>  | 323.1876        | 628.3413         | 314.6743         | 627.3573         | 314.1823         | 5  |
| 10 | 1207.5742       | 604.2907        | 1190.5477      | 595.7775         | 1189.5636      | 595.2855         | D    | 489.2667         | 245.1370        | 472.2402         | 236.6237         | 471.2562         | 236.1317         | 4  |
| 11 | 1320.6583       | <b>660.8328</b> | 1303.6317      | 652.3195         | 1302.6477      | 651.8275         | L    | <b>374.2398</b>  | 187.6235        | <b>357.2132</b>  | 179.1103         |                  |                  | 3  |
| 12 | 1434.7012       | 717.8542        | 1417.6747      | 709.3410         | 1416.6906      | 708.8490         | N    | <b>261.1557</b>  | <b>131.0815</b> | <b>244.1292</b>  | 122.5682         |                  |                  | 2  |
| 13 |                 |                 |                |                  |                |                  | K    | <b>147.1128</b>  | 74.0600         | 130.0863         | 65.5468          |                  |                  | 1  |



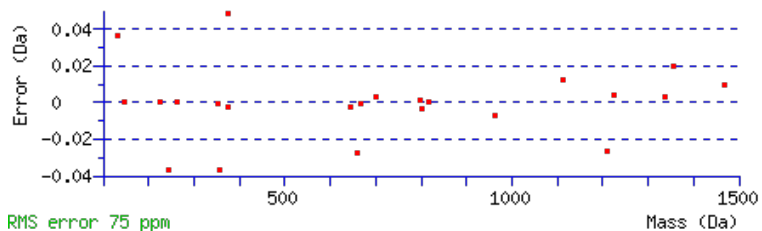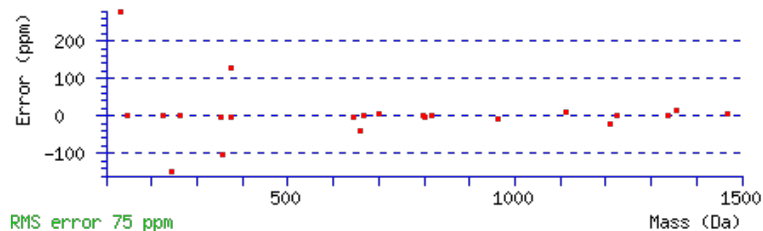

NCBI BLAST search of [LLQDFENGRDLNK](#)

(Parameters: blastp, nr protein database, expect=20000, no filter, PAM30)

Other BLAST [web gateways](#)

**All matches to this query**

| Score | Mr(calc)  | Delta   | Sequence                      | Site Analysis         |
|-------|-----------|---------|-------------------------------|-----------------------|
| 76.4  | 1579.7994 | -0.0005 | <a href="#">LLQDFENGRDLNK</a> | Deamidated N7 100.00% |
| 30.3  | 1579.7994 | -0.0005 | <a href="#">LLQDFENGRDLNK</a> | Deamidated N12 0.00%  |
| 24.2  | 1579.7994 | -0.0005 | <a href="#">LLQDFENGRDLNK</a> | Deamidated Q3 0.00%   |

Mascot: <http://www.matrixscience.com/>

# Mascot Search Results

## Peptide View

MS/MS Fragmentation of **LLQDFFNGRDLNK**

Found in **P0DMV8** in **uni\_human\_nr**, HS71A\_HUMAN Heat shock 70 kDa protein 1A OS=Homo sapiens GN=HSPA1A PE=1 SV=1

Match to Query 5517: 1578.811748 from(790.413150,2+) intensity(5705839.0000) rtinseconds(2118) scans(13496) index(10694)

Title: 130806\_HPL\_Human\_Plaque\_BR1\_TR2\_02\_Spectrum035398\_scans\_\_13496\_RTINSECONDS=2118

Data file E:\RAW\HumanPlaques\mgf\T\1D\T130806\_HPL\_Human\_Plaque\_BR1\_TR2\_02.mgf

Click mouse within plot area to zoom in by factor of two about that point

Or,  to  Da

Label all possible matches  Label matches used for scoring

Show Y-axis

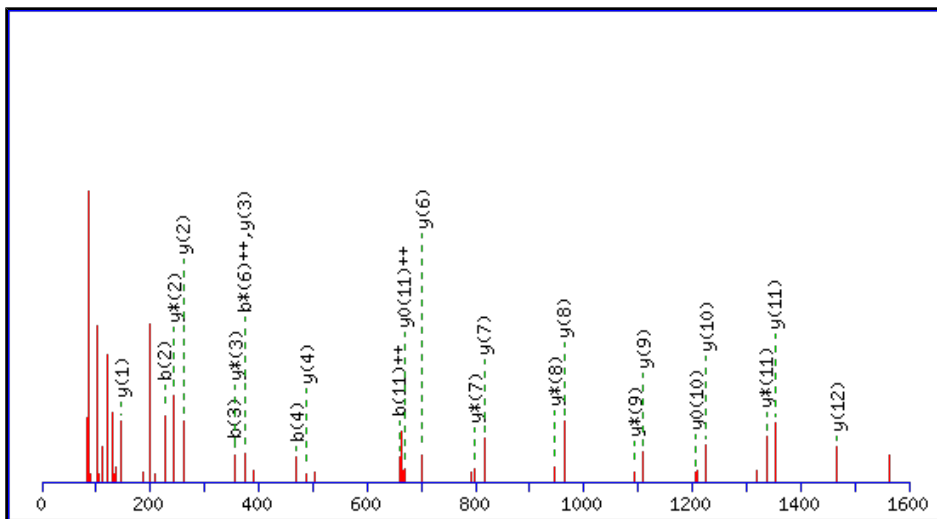

Monoisotopic mass of neutral peptide **Mr(calc)**: 1578.8154

**Fixed modifications**: Carbamidomethyl (C) (apply to specified residues or termini only)

**Ions Score**: 78 **Expect**: 1.3e-006

**Matches** : 24/128 fragment ions using 44 most intense peaks ([help](#))

| #  | b               | b <sup>++</sup> | b <sup>*</sup> | b <sup>*++</sup> | b <sup>0</sup> | b <sup>0++</sup> | Seq. | y                | y <sup>++</sup> | y <sup>*</sup>   | y <sup>*++</sup> | y <sup>0</sup>   | y <sup>0++</sup> | #  |
|----|-----------------|-----------------|----------------|------------------|----------------|------------------|------|------------------|-----------------|------------------|------------------|------------------|------------------|----|
| 1  | 114.0913        | 57.5493         |                |                  |                |                  | L    |                  |                 |                  |                  |                  |                  | 13 |
| 2  | <b>227.1754</b> | 114.0913        |                |                  |                |                  | L    | <b>1466.7387</b> | 733.8730        | 1449.7121        | 725.3597         | 1448.7281        | 724.8677         | 12 |
| 3  | <b>355.2340</b> | 178.1206        | 338.2074       | 169.6074         |                |                  | Q    | <b>1353.6546</b> | 677.3309        | <b>1336.6280</b> | 668.8177         | 1335.6440        | <b>668.3257</b>  | 11 |
| 4  | <b>470.2609</b> | 235.6341        | 453.2344       | 227.1208         | 452.2504       | 226.6288         | D    | <b>1225.5960</b> | 613.3016        | 1208.5695        | 604.7884         | <b>1207.5854</b> | 604.2964         | 10 |
| 5  | 617.3293        | 309.1683        | 600.3028       | 300.6550         | 599.3188       | 300.1630         | F    | <b>1110.5691</b> | 555.7882        | <b>1093.5425</b> | 547.2749         | 1092.5585        | 546.7829         | 9  |
| 6  | 764.3978        | 382.7025        | 747.3712       | <b>374.1892</b>  | 746.3872       | 373.6972         | F    | <b>963.5007</b>  | 482.2540        | <b>946.4741</b>  | 473.7407         | 945.4901         | 473.2487         | 8  |
| 7  | 878.4407        | 439.7240        | 861.4141       | 431.2107         | 860.4301       | 430.7187         | N    | <b>816.4322</b>  | 408.7198        | <b>799.4057</b>  | 400.2065         | 798.4217         | 399.7145         | 7  |
| 8  | 935.4621        | 468.2347        | 918.4356       | 459.7214         | 917.4516       | 459.2294         | G    | <b>702.3893</b>  | 351.6983        | 685.3628         | 343.1850         | 684.3787         | 342.6930         | 6  |
| 9  | 1091.5633       | 546.2853        | 1074.5367      | 537.7720         | 1073.5527      | 537.2800         | R    | 645.3678         | 323.1876        | 628.3413         | 314.6743         | 627.3573         | 314.1823         | 5  |
| 10 | 1206.5902       | 603.7987        | 1189.5636      | 595.2855         | 1188.5796      | 594.7935         | D    | <b>489.2667</b>  | 245.1370        | 472.2402         | 236.6237         | 471.2562         | 236.1317         | 4  |
| 11 | 1319.6743       | <b>660.3408</b> | 1302.6477      | 651.8275         | 1301.6637      | 651.3355         | L    | <b>374.2398</b>  | 187.6235        | <b>357.2132</b>  | 179.1103         |                  |                  | 3  |
| 12 | 1433.7172       | 717.3622        | 1416.6906      | 708.8490         | 1415.7066      | 708.3569         | N    | <b>261.1557</b>  | 131.0815        | <b>244.1292</b>  | 122.5682         |                  |                  | 2  |
| 13 |                 |                 |                |                  |                |                  | K    | <b>147.1128</b>  | 74.0600         | 130.0863         | 65.5468          |                  |                  | 1  |

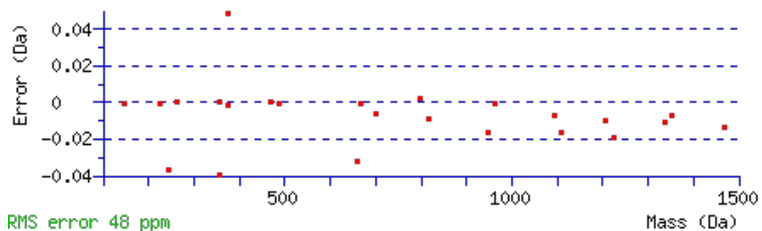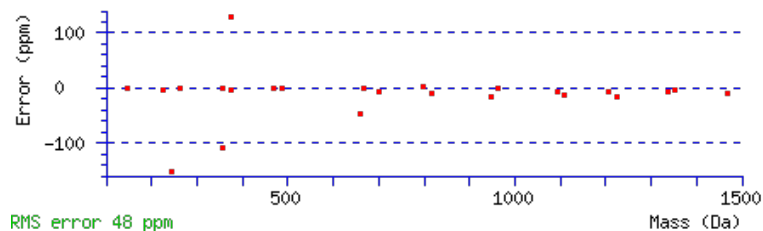

NCBI BLAST search of [LLQDFFNDRDLNK](#)

(Parameters: blastp, nr protein database, expect=20000, no filter, PAM30)

Other BLAST [web gateways](#)

**All matches to this query**

| Score | Mr(calc)  | Delta   | Sequence                        |
|-------|-----------|---------|---------------------------------|
| 77.9  | 1578.8154 | -0.0037 | <a href="#">LLQDFFNDRDLNK</a>   |
| 9.8   | 1578.8076 | 0.0042  | <a href="#">DKLLAMGSGNFGEIK</a> |
| 8.9   | 1578.8042 | 0.0075  | <a href="#">IIFIDSTWNQTNK</a>   |
| 4.7   | 1576.7984 | 2.0133  | <a href="#">EKLDEFNELAIQK</a>   |
| 2.7   | 1578.8114 | 0.0003  | <a href="#">LLDAGGDLRLHDER</a>  |
| 2.6   | 1577.8049 | 1.0068  | <a href="#">KDLQDPNLQGEPPK</a>  |

Mascot: <http://www.matrixscience.com/>

# Mascot Search Results

## Peptide View

MS/MS Fragmentation of **LLQDFFNGRDLNK**

Found in **P0DMV8** in **uni\_human\_nr**, HS71A\_HUMAN Heat shock 70 kDa protein 1A OS=Homo sapiens GN=HSPA1A PE=1 SV=1

Match to Query 5268: 1578.811482 from(527.277770,3+) intensity(12430808.0000) rtinseconds(2099) scans(12947) index(9966)

Title: 130801\_HPL\_Human\_Plaque\_BR2\_TR1\_02\_Spectrum034121\_scans\_\_12947\_RTINSECONDS=2099

Data file E:\RAW\HumanPlaques\mgf\T\1D\T130801\_HPL\_Human\_Plaque\_BR2\_TR1\_02.mgf

Click mouse within plot area to zoom in by factor of two about that point

Or,  to  Da

Label all possible matches  Label matches used for scoring

Show Y-axis

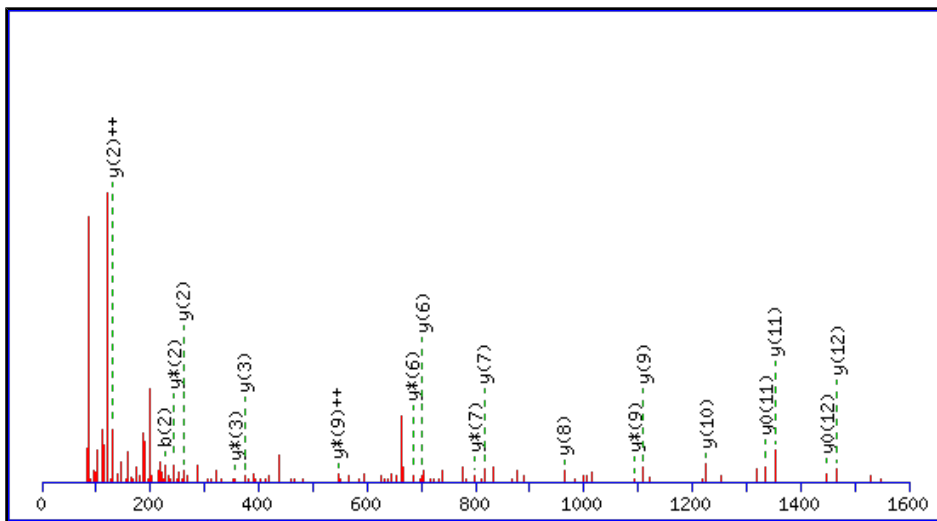

Monoisotopic mass of neutral peptide **Mr(calc):** 1578.8154

Fixed modifications: Carbamidomethyl (C) (apply to specified residues or termini only)

Ions Score: 21 Expect: 0.67

Matches : 19/128 fragment ions using 79 most intense peaks ([help](#))

| #  | b         | b <sup>++</sup> | b <sup>*</sup> | b <sup>*++</sup> | b <sup>0</sup> | b <sup>0++</sup> | Seq. | y         | y <sup>++</sup> | y <sup>*</sup> | y <sup>*++</sup> | y <sup>0</sup> | y <sup>0++</sup> | #  |
|----|-----------|-----------------|----------------|------------------|----------------|------------------|------|-----------|-----------------|----------------|------------------|----------------|------------------|----|
| 1  | 114.0913  | 57.5493         |                |                  |                |                  | L    |           |                 |                |                  |                |                  | 13 |
| 2  | 227.1754  | 114.0913        |                |                  |                |                  | L    | 1466.7387 | 733.8730        | 1449.7121      | 725.3597         | 1448.7281      | 724.8677         | 12 |
| 3  | 355.2340  | 178.1206        | 338.2074       | 169.6074         |                |                  | Q    | 1353.6546 | 677.3309        | 1336.6280      | 668.8177         | 1335.6440      | 668.3257         | 11 |
| 4  | 470.2609  | 235.6341        | 453.2344       | 227.1208         | 452.2504       | 226.6288         | D    | 1225.5960 | 613.3016        | 1208.5695      | 604.7884         | 1207.5854      | 604.2964         | 10 |
| 5  | 617.3293  | 309.1683        | 600.3028       | 300.6550         | 599.3188       | 300.1630         | F    | 1110.5691 | 555.7882        | 1093.5425      | 547.2749         | 1092.5585      | 546.7829         | 9  |
| 6  | 764.3978  | 382.7025        | 747.3712       | 374.1892         | 746.3872       | 373.6972         | F    | 963.5007  | 482.2540        | 946.4741       | 473.7407         | 945.4901       | 473.2487         | 8  |
| 7  | 878.4407  | 439.7240        | 861.4141       | 431.2107         | 860.4301       | 430.7187         | N    | 816.4322  | 408.7198        | 799.4057       | 400.2065         | 798.4217       | 399.7145         | 7  |
| 8  | 935.4621  | 468.2347        | 918.4356       | 459.7214         | 917.4516       | 459.2294         | G    | 702.3893  | 351.6983        | 685.3628       | 343.1850         | 684.3787       | 342.6930         | 6  |
| 9  | 1091.5633 | 546.2853        | 1074.5367      | 537.7720         | 1073.5527      | 537.2800         | R    | 645.3678  | 323.1876        | 628.3413       | 314.6743         | 627.3573       | 314.1823         | 5  |
| 10 | 1206.5902 | 603.7987        | 1189.5636      | 595.2855         | 1188.5796      | 594.7935         | D    | 489.2667  | 245.1370        | 472.2402       | 236.6237         | 471.2562       | 236.1317         | 4  |
| 11 | 1319.6743 | 660.3408        | 1302.6477      | 651.8275         | 1301.6637      | 651.3355         | L    | 374.2398  | 187.6235        | 357.2132       | 179.1103         |                |                  | 3  |
| 12 | 1433.7172 | 717.3622        | 1416.6906      | 708.8490         | 1415.7066      | 708.3569         | N    | 261.1557  | 131.0815        | 244.1292       | 122.5682         |                |                  | 2  |
| 13 |           |                 |                |                  |                |                  | K    | 147.1128  | 74.0600         | 130.0863       | 65.5468          |                |                  | 1  |

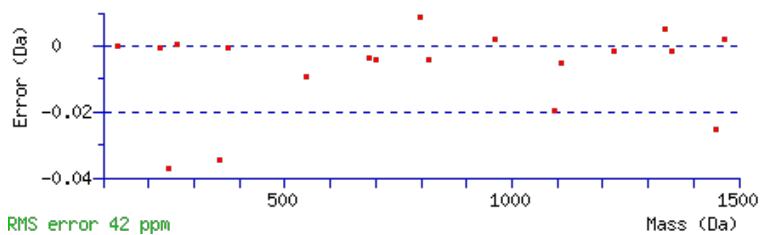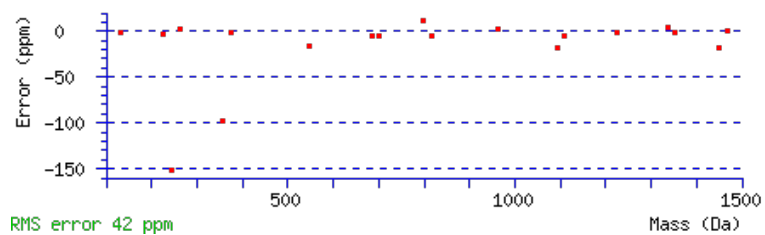

NCBI BLAST search of [LLQDFENGRDLNK](#)

(Parameters: blastp, nr protein database, expect=20000, no filter, PAM30)

Other BLAST [web gateways](#)

**All matches to this query**

| Score | Mr(calc)  | Delta   | Sequence                      |
|-------|-----------|---------|-------------------------------|
| 20.7  | 1578.8154 | -0.0039 | <a href="#">LLQDFENGRDLNK</a> |

Mascot: <http://www.matrixscience.com/>

# Mascot Search Results

## Peptide View

MS/MS Fragmentation of **NGRVEIANDQGNR**

Found in **P11021** in **uni\_human\_nr**, GRP78\_HUMAN 78 kDa glucose-regulated protein OS=Homo sapiens GN=HSPA5 PE=1 SV=2

Match to Query 3830: 1555.769502 from(519.597110,3+) intensity(1626998.0000) rtinseconds(1252) scans(5936) index(3938)

Title: 130809\_HPL\_Human\_Plaque\_BR2\_TR3\_08\_Spectrum025436\_scans\_5936\_RTINSECONDS=1252

Data file E:\RAW\HumanPlaques\mgf\T\1D\T130809\_HPL\_Human\_Plaque\_BR2\_TR3\_08.mgf

Click mouse within plot area to zoom in by factor of two about that point

Or,  to  Da

Label all possible matches  Label matches used for scoring

Show Y-axis

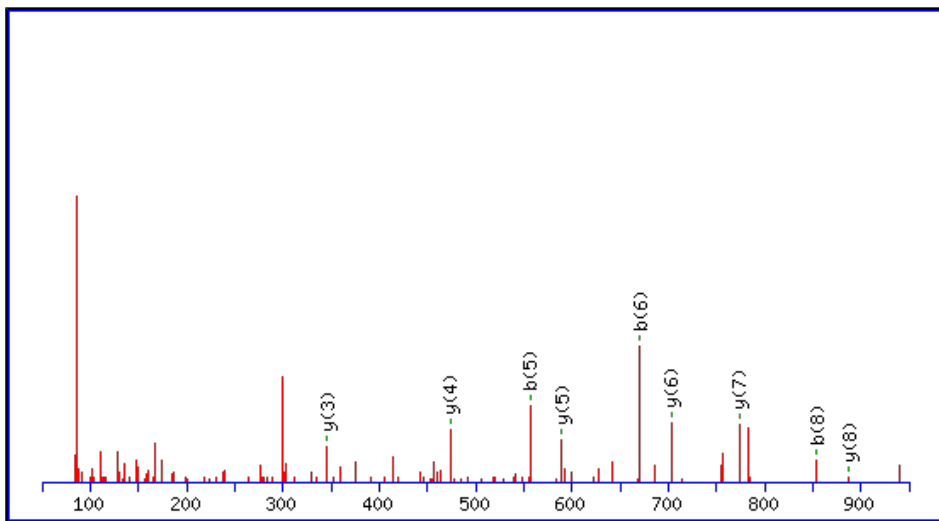

Monoisotopic mass of neutral peptide  $M_r(\text{calc})$ : 1555.7702

Fixed modifications: Carbamidomethyl (C) (apply to specified residues or termini only)

Variable modifications:

N1 : Deamidated (NQ)

Ions Score: 30 Expect: 0.07

Matches : 9/140 fragment ions using 18 most intense peaks ([help](#))

| #  | b               | b <sup>++</sup> | b <sup>*</sup> | b <sup>*++</sup> | b <sup>0</sup> | b <sup>0++</sup> | Seq. | y               | y <sup>++</sup> | y <sup>*</sup> | y <sup>*++</sup> | y <sup>0</sup> | y <sup>0++</sup> | #  |
|----|-----------------|-----------------|----------------|------------------|----------------|------------------|------|-----------------|-----------------|----------------|------------------|----------------|------------------|----|
| 1  | 116.0342        | 58.5207         | 99.0077        | 50.0075          |                |                  | N    |                 |                 |                |                  |                |                  | 14 |
| 2  | 173.0557        | 87.0315         | 156.0291       | 78.5182          |                |                  | G    | 1441.7506       | 721.3789        | 1424.7241      | 712.8657         | 1423.7400      | 712.3737         | 13 |
| 3  | 329.1568        | 165.0820        | 312.1302       | 156.5688         |                |                  | R    | 1384.7292       | 692.8682        | 1367.7026      | 684.3549         | 1366.7186      | 683.8629         | 12 |
| 4  | 428.2252        | 214.6162        | 411.1987       | 206.1030         |                |                  | V    | 1228.6280       | 614.8177        | 1211.6015      | 606.3044         | 1210.6175      | 605.8124         | 11 |
| 5  | <b>557.2678</b> | 279.1375        | 540.2413       | 270.6243         | 539.2572       | 270.1323         | E    | 1129.5596       | 565.2835        | 1112.5331      | 556.7702         | 1111.5491      | 556.2782         | 10 |
| 6  | <b>670.3519</b> | 335.6796        | 653.3253       | 327.1663         | 652.3413       | 326.6743         | I    | 1000.5170       | 500.7622        | 983.4905       | 492.2489         | 982.5065       | 491.7569         | 9  |
| 7  | 783.4359        | 392.2216        | 766.4094       | 383.7083         | 765.4254       | 383.2163         | I    | <b>887.4330</b> | 444.2201        | 870.4064       | 435.7068         | 869.4224       | 435.2148         | 8  |
| 8  | <b>854.4730</b> | 427.7402        | 837.4465       | 419.2269         | 836.4625       | 418.7349         | A    | <b>774.3489</b> | 387.6781        | 757.3224       | 379.1648         | 756.3383       | 378.6728         | 7  |
| 9  | 968.5160        | 484.7616        | 951.4894       | 476.2483         | 950.5054       | 475.7563         | N    | <b>703.3118</b> | 352.1595        | 686.2852       | 343.6463         | 685.3012       | 343.1543         | 6  |
| 10 | 1083.5429       | 542.2751        | 1066.5164      | 533.7618         | 1065.5323      | 533.2698         | D    | <b>589.2689</b> | 295.1381        | 572.2423       | 286.6248         | 571.2583       | 286.1328         | 5  |
| 11 | 1211.6015       | 606.3044        | 1194.5749      | 597.7911         | 1193.5909      | 597.2991         | Q    | <b>474.2419</b> | 237.6246        | 457.2154       | 229.1113         |                |                  | 4  |
| 12 | 1268.6230       | 634.8151        | 1251.5964      | 626.3018         | 1250.6124      | 625.8098         | G    | <b>346.1833</b> | 173.5953        | 329.1568       | 165.0820         |                |                  | 3  |
| 13 | 1382.6659       | 691.8366        | 1365.6393      | 683.3233         | 1364.6553      | 682.8313         | N    | 289.1619        | 145.0846        | 272.1353       | 136.5713         |                |                  | 2  |
| 14 |                 |                 |                |                  |                |                  | R    | 175.1190        | 88.0631         | 158.0924       | 79.5498          |                |                  | 1  |

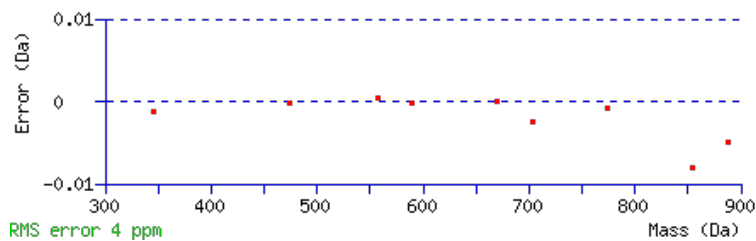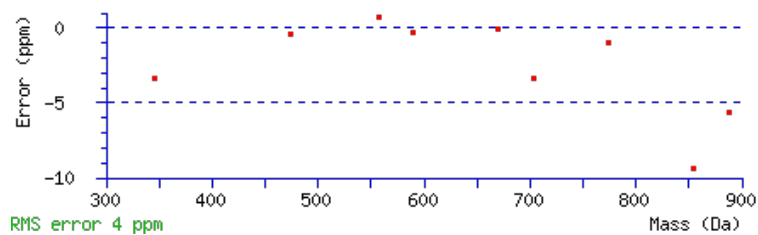

NCBI BLAST search of [NGRVEIANDQGNR](#)

(Parameters: blastp, nr protein database, expect=20000, no filter, PAM30)

Other BLAST [web gateways](#)

**All matches to this query**

| Score | Mr(calc)  | Delta   | Sequence                      |
|-------|-----------|---------|-------------------------------|
| 29.8  | 1555.7702 | -0.0007 | <a href="#">NGRVEIANDQGNR</a> |

Mascot: <http://www.matrixscience.com/>

# Mascot Search Results

## Peptide View

MS/MS Fragmentation of **NGRVEIANDQGNR**

Found in **P11021** in **uni\_human\_nr**, GRP78\_HUMAN 78 kDa glucose-regulated protein OS=Homo sapiens GN=HSPA5 PE=1 SV=2

Match to Query 4101: 1554.786582 from(519.269470,3+) intensity(3866337.5000) rtinseconds(985) scans(3965) index(2116)

Title: 130801\_HPL\_Human\_Plaque\_BR1\_TR1\_04\_Spectrum025114\_scans\_3965\_RTINSECONDS=985

Data file E:\RAW\HumanPlaques\mgf\T\1D\T130801\_HPL\_Human\_Plaque\_BR1\_TR1\_04.mgf

Click mouse within plot area to zoom in by factor of two about that point

Or,  to  Da

Label all possible matches  Label matches used for scoring

Show Y-axis

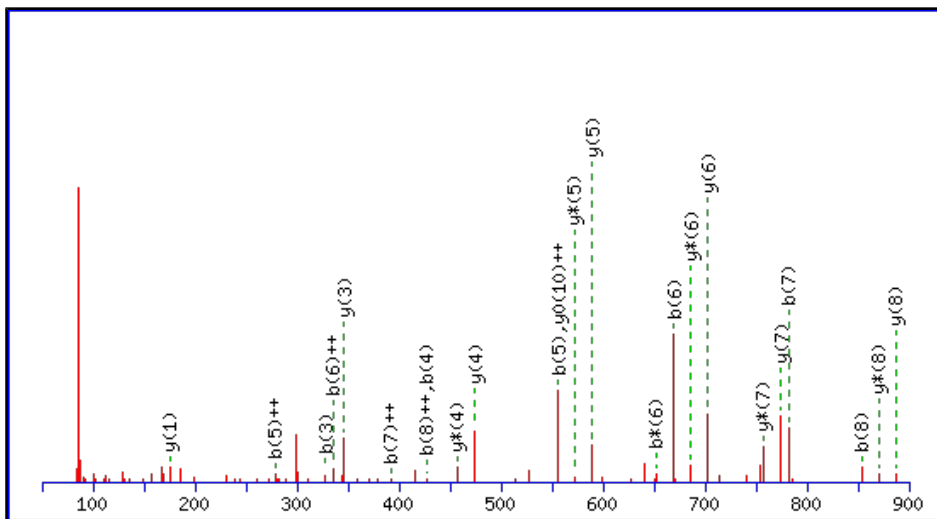

Monoisotopic mass of neutral peptide **Mr(calc):** 1554.7862

Fixed modifications: Carbamidomethyl (C) (apply to specified residues or termini only)

Ions Score: 46 Expect: 0.0017

Matches : 24/140 fragment ions using 38 most intense peaks ([help](#))

| #  | b               | b <sup>++</sup> | b <sup>*</sup>  | b <sup>*++</sup> | b <sup>0</sup> | b <sup>0++</sup> | Seq. | y               | y <sup>++</sup> | y <sup>*</sup>  | y <sup>*++</sup> | y <sup>0</sup> | y <sup>0++</sup> | #  |
|----|-----------------|-----------------|-----------------|------------------|----------------|------------------|------|-----------------|-----------------|-----------------|------------------|----------------|------------------|----|
| 1  | 115.0502        | 58.0287         | 98.0237         | 49.5155          |                |                  | N    |                 |                 |                 |                  |                |                  | 14 |
| 2  | 172.0717        | 86.5395         | 155.0451        | 78.0262          |                |                  | G    | 1441.7506       | 721.3789        | 1424.7241       | 712.8657         | 1423.7401      | 712.3737         | 13 |
| 3  | <b>328.1728</b> | 164.5900        | 311.1462        | 156.0768         |                |                  | R    | 1384.7292       | 692.8682        | 1367.7026       | 684.3549         | 1366.7186      | 683.8629         | 12 |
| 4  | <b>427.2412</b> | 214.1242        | 410.2146        | 205.6110         |                |                  | V    | 1228.6280       | 614.8177        | 1211.6015       | 606.3044         | 1210.6175      | 605.8124         | 11 |
| 5  | <b>556.2838</b> | <b>278.6455</b> | 539.2572        | 270.1323         | 538.2732       | 269.6402         | E    | 1129.5596       | 565.2835        | 1112.5331       | 556.7702         | 1111.5491      | <b>556.2782</b>  | 10 |
| 6  | <b>669.3678</b> | <b>335.1876</b> | <b>652.3413</b> | 326.6743         | 651.3573       | 326.1823         | I    | 1000.5170       | 500.7622        | 983.4905        | 492.2489         | 982.5065       | 491.7569         | 9  |
| 7  | <b>782.4519</b> | <b>391.7296</b> | 765.4254        | 383.2163         | 764.4413       | 382.7243         | I    | <b>887.4330</b> | 444.2201        | <b>870.4064</b> | 435.7068         | 869.4224       | 435.2148         | 8  |
| 8  | <b>853.4890</b> | <b>427.2482</b> | 836.4625        | 418.7349         | 835.4785       | 418.2429         | A    | <b>774.3489</b> | 387.6781        | <b>757.3224</b> | 379.1648         | 756.3383       | 378.6728         | 7  |
| 9  | 967.5320        | 484.2696        | 950.5054        | 475.7563         | 949.5214       | 475.2643         | N    | <b>703.3118</b> | 352.1595        | <b>686.2852</b> | 343.6463         | 685.3012       | 343.1543         | 6  |
| 10 | 1082.5589       | 541.7831        | 1065.5323       | 533.2698         | 1064.5483      | 532.7778         | D    | <b>589.2689</b> | 295.1381        | <b>572.2423</b> | 286.6248         | 571.2583       | 286.1328         | 5  |
| 11 | 1210.6175       | 605.8124        | 1193.5909       | 597.2991         | 1192.6069      | 596.8071         | Q    | <b>474.2419</b> | 237.6246        | <b>457.2154</b> | 229.1113         |                |                  | 4  |
| 12 | 1267.6389       | 634.3231        | 1250.6124       | 625.8098         | 1249.6284      | 625.3178         | G    | <b>346.1833</b> | 173.5953        | 329.1568        | 165.0820         |                |                  | 3  |
| 13 | 1381.6819       | 691.3446        | 1364.6553       | 682.8313         | 1363.6713      | 682.3393         | N    | 289.1619        | 145.0846        | 272.1353        | 136.5713         |                |                  | 2  |
| 14 |                 |                 |                 |                  |                |                  | R    | <b>175.1190</b> | 88.0631         | 158.0924        | 79.5498          |                |                  | 1  |



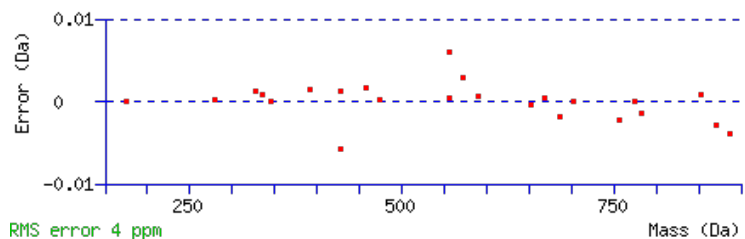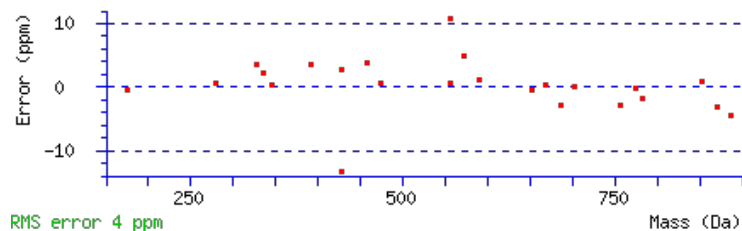

NCBI BLAST search of [NGRVEIANDQGNR](#)

(Parameters: blastp, nr protein database, expect=20000, no filter, PAM30)

Other BLAST [web gateways](#)

**All matches to this query**

| Score | Mr(calc)  | Delta  | Sequence                      |
|-------|-----------|--------|-------------------------------|
| 46.3  | 1554.7862 | 0.0003 | <a href="#">NGRVEIANDQGNR</a> |

Mascot: <http://www.matrixscience.com/>

# Mascot Search Results

## Peptide View

MS/MS Fragmentation of **NGRVEIANDQGNR**

Found in **P11021** in **uni\_human\_nr**, GRP78\_HUMAN 78 kDa glucose-regulated protein OS=Homo sapiens GN=HSPA5 PE=1 SV=2

Match to Query 4299: 1554.785748 from(778.400150,2+) intensity(742938.5625) rtinseconds(958) scans(4000) index(2269)

Title: 130806\_HPL\_Human\_Plaque\_BR1\_TR2\_04\_Spectrum025683\_scans\_4000\_RTINSECONDS=958

Data file E:\RAW\HumanPlaques\mgf\T\1D\T130806\_HPL\_Human\_Plaque\_BR1\_TR2\_04.mgf

Click mouse within plot area to zoom in by factor of two about that point

Or,  to  Da

Label all possible matches  Label matches used for scoring

Show Y-axis

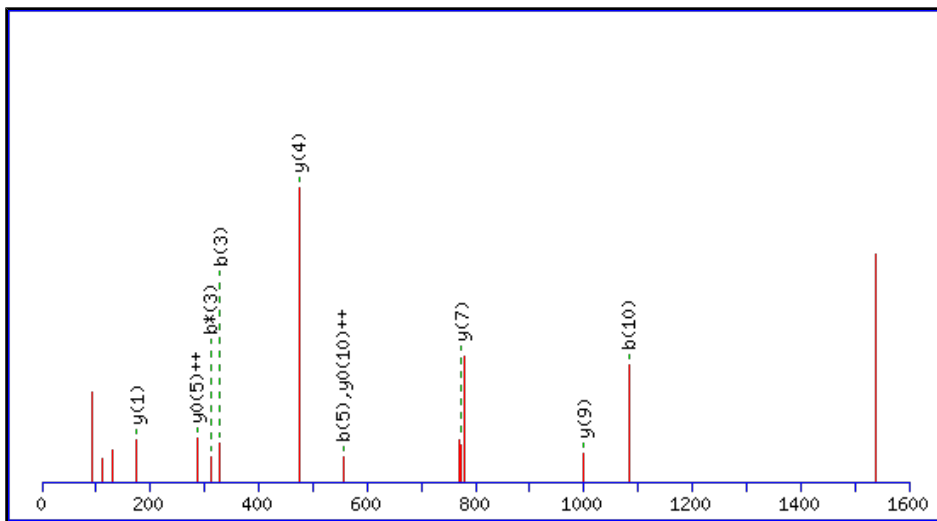

Monoisotopic mass of neutral peptide **Mr(calc): 1554.7862**

Fixed modifications: Carbamidomethyl (C) (apply to specified residues or termini only)

Ions Score: 30 Expect: 0.079

Matches : 10/140 fragment ions using 14 most intense peaks ([help](#))

| #  | b                | b <sup>++</sup> | b <sup>*</sup>  | b <sup>*++</sup> | b <sup>0</sup> | b <sup>0++</sup> | Seq. | y                | y <sup>++</sup> | y <sup>*</sup> | y <sup>*++</sup> | y <sup>0</sup> | y <sup>0++</sup> | #  |
|----|------------------|-----------------|-----------------|------------------|----------------|------------------|------|------------------|-----------------|----------------|------------------|----------------|------------------|----|
| 1  | 115.0502         | 58.0287         | 98.0237         | 49.5155          |                |                  | N    |                  |                 |                |                  |                |                  | 14 |
| 2  | 172.0717         | 86.5395         | 155.0451        | 78.0262          |                |                  | G    | 1441.7506        | 721.3789        | 1424.7241      | 712.8657         | 1423.7401      | 712.3737         | 13 |
| 3  | <b>328.1728</b>  | 164.5900        | <b>311.1462</b> | 156.0768         |                |                  | R    | 1384.7292        | 692.8682        | 1367.7026      | 684.3549         | 1366.7186      | 683.8629         | 12 |
| 4  | 427.2412         | 214.1242        | 410.2146        | 205.6110         |                |                  | V    | 1228.6280        | 614.8177        | 1211.6015      | 606.3044         | 1210.6175      | 605.8124         | 11 |
| 5  | <b>556.2838</b>  | 278.6455        | 539.2572        | 270.1323         | 538.2732       | 269.6402         | E    | 1129.5596        | 565.2835        | 1112.5331      | 556.7702         | 1111.5491      | <b>556.2782</b>  | 10 |
| 6  | 669.3678         | 335.1876        | 652.3413        | 326.6743         | 651.3573       | 326.1823         | I    | <b>1000.5170</b> | 500.7622        | 983.4905       | 492.2489         | 982.5065       | 491.7569         | 9  |
| 7  | 782.4519         | 391.7296        | 765.4254        | 383.2163         | 764.4413       | 382.7243         | I    | 887.4330         | 444.2201        | 870.4064       | 435.7068         | 869.4224       | 435.2148         | 8  |
| 8  | 853.4890         | 427.2482        | 836.4625        | 418.7349         | 835.4785       | 418.2429         | A    | <b>774.3489</b>  | 387.6781        | 757.3224       | 379.1648         | 756.3383       | 378.6728         | 7  |
| 9  | 967.5320         | 484.2696        | 950.5054        | 475.7563         | 949.5214       | 475.2643         | N    | 703.3118         | 352.1595        | 686.2852       | 343.6463         | 685.3012       | 343.1543         | 6  |
| 10 | <b>1082.5589</b> | 541.7831        | 1065.5323       | 533.2698         | 1064.5483      | 532.7778         | D    | 589.2689         | 295.1381        | 572.2423       | 286.6248         | 571.2583       | <b>286.1328</b>  | 5  |
| 11 | 1210.6175        | 605.8124        | 1193.5909       | 597.2991         | 1192.6069      | 596.8071         | Q    | <b>474.2419</b>  | 237.6246        | 457.2154       | 229.1113         |                |                  | 4  |
| 12 | 1267.6389        | 634.3231        | 1250.6124       | 625.8098         | 1249.6284      | 625.3178         | G    | 346.1833         | 173.5953        | 329.1568       | 165.0820         |                |                  | 3  |
| 13 | 1381.6819        | 691.3446        | 1364.6553       | 682.8313         | 1363.6713      | 682.3393         | N    | 289.1619         | 145.0846        | 272.1353       | 136.5713         |                |                  | 2  |
| 14 |                  |                 |                 |                  |                |                  | R    | <b>175.1190</b>  | 88.0631         | 158.0924       | 79.5498          |                |                  | 1  |

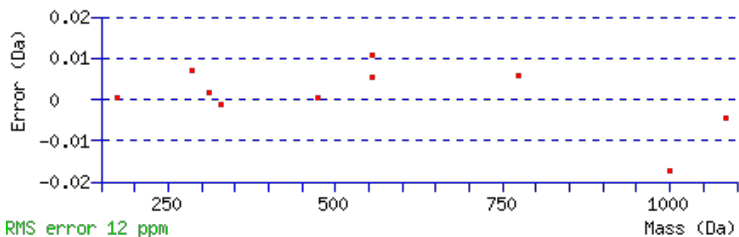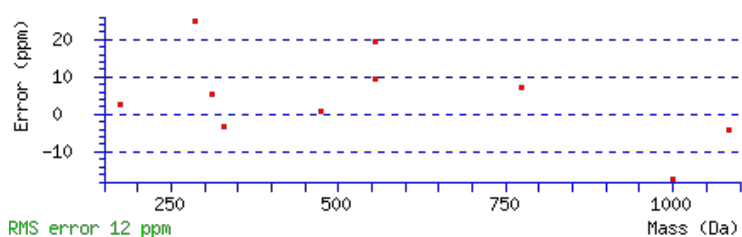

NCBI BLAST search of [NGRVEIANDQGNR](#)

(Parameters: blastp, nr protein database, expect=20000, no filter, PAM30)

Other BLAST [web gateways](#)

**All matches to this query**

| Score | Mr(calc)  | Delta   | Sequence                         |
|-------|-----------|---------|----------------------------------|
| 29.5  | 1554.7862 | -0.0005 | <a href="#">NGRVEIANDQGNR</a>    |
| 5.7   | 1554.7824 | 0.0034  | <a href="#">KPAATSPLSPMANGGR</a> |
| 3.9   | 1554.7864 | -0.0007 | <a href="#">CLVTQVAYFLANR</a>    |
| 3.9   | 1554.7864 | -0.0007 | <a href="#">CLVTQVAYFLANR</a>    |
| 3.9   | 1554.7871 | -0.0014 | <a href="#">LCLSRPCPPSRGR</a>    |
| 1.0   | 1553.7872 | 0.9986  | <a href="#">VGNMDTETKIQRK</a>    |
| 0.9   | 1554.7936 | -0.0079 | <a href="#">RENRHTEEMIEK</a>     |
| 0.3   | 1553.7838 | 1.0019  | <a href="#">DVTIESVGVYNANR</a>   |
| 0.3   | 1553.7871 | 0.9986  | <a href="#">VPMAAAVPKAENPSR</a>  |

Mascot: <http://www.matrixscience.com/>

# Mascot Search Results

## Peptide View

MS/MS Fragmentation of **ATAESASECLPCDCNGR**

Found in **P11047** in **uni\_human\_nr**, LAMC1\_HUMAN Laminin subunit gamma-1 OS=Homo sapiens GN=LAMC1 PE=1 SV=3

Match to Query 7979: 1897.723128 from(949.868840,2+) intensity(587877.8125) rtinseconds(1353) scans(6444) index(4314)

Title: 130806\_HPL\_Human\_Plaque\_BR1\_TR2\_18\_Spectrum024462\_scans\_6444\_RTINSECONDS=1353

Data file E:\RAW\HumanPlaques\mgf\T\1D\T130806\_HPL\_Human\_Plaque\_BR1\_TR2\_18.mgf

Click mouse within plot area to zoom in by factor of two about that point

Or,  to  Da

Label all possible matches  Label matches used for scoring

Show Y-axis

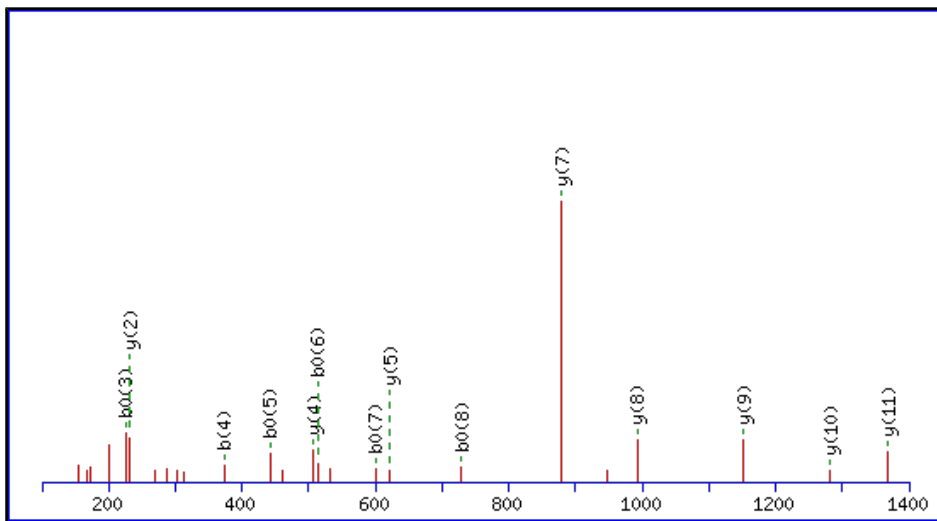

**Monoisotopic mass of neutral peptide Mr(calc):** 1897.7240

**Fixed modifications:** Carbamidomethyl (C) (apply to specified residues or termini only)

**Variable modifications:**

N15 : Deamidated (NQ)

**Ions Score:** 67 **Expect:** 3.7e-007

**Matches :** 14/154 fragment ions using 17 most intense peaks ([help](#))

| #  | b               | b <sup>++</sup> | b <sup>*</sup> | b <sup>***</sup> | b <sup>0</sup> | b <sup>0++</sup> | Seq. | y                | y <sup>++</sup> | y <sup>*</sup> | y <sup>***</sup> | y <sup>0</sup> | y <sup>0++</sup> | #  |
|----|-----------------|-----------------|----------------|------------------|----------------|------------------|------|------------------|-----------------|----------------|------------------|----------------|------------------|----|
| 1  | 72.0444         | 36.5258         |                |                  |                |                  | A    |                  |                 |                |                  |                |                  | 17 |
| 2  | 173.0921        | 87.0497         |                |                  | 155.0815       | 78.0444          | T    | 1827.6942        | 914.3508        | 1810.6677      | 905.8375         | 1809.6837      | 905.3455         | 16 |
| 3  | 244.1292        | 122.5682        |                |                  | 226.1186       | 113.5629         | A    | 1726.6465        | 863.8269        | 1709.6200      | 855.3136         | 1708.6360      | 854.8216         | 15 |
| 4  | <b>373.1718</b> | 187.0895        |                |                  | 355.1612       | 178.0842         | E    | 1655.6094        | 828.3084        | 1638.5829      | 819.7951         | 1637.5989      | 819.3031         | 14 |
| 5  | 460.2038        | 230.6055        |                |                  | 442.1932       | 221.6003         | S    | 1526.5668        | 763.7871        | 1509.5403      | 755.2738         | 1508.5563      | 754.7818         | 13 |
| 6  | 531.2409        | 266.1241        |                |                  | 513.2304       | 257.1188         | A    | 1439.5348        | 720.2710        | 1422.5083      | 711.7578         | 1421.5242      | 711.2658         | 12 |
| 7  | 618.2729        | 309.6401        |                |                  | 600.2624       | 300.6348         | S    | <b>1368.4977</b> | 684.7525        | 1351.4711      | 676.2392         | 1350.4871      | 675.7472         | 11 |
| 8  | 747.3155        | 374.1614        |                |                  | 729.3050       | 365.1561         | E    | <b>1281.4657</b> | 641.2365        | 1264.4391      | 632.7232         | 1263.4551      | 632.2312         | 10 |
| 9  | 907.3462        | 454.1767        |                |                  | 889.3356       | 445.1714         | C    | <b>1152.4231</b> | 576.7152        | 1135.3965      | 568.2019         | 1134.4125      | 567.7099         | 9  |
| 10 | 1020.4303       | 510.7188        |                |                  | 1002.4197      | 501.7135         | L    | <b>992.3924</b>  | 496.6999        | 975.3659       | 488.1866         | 974.3819       | 487.6946         | 8  |
| 11 | 1117.4830       | 559.2451        |                |                  | 1099.4725      | 550.2399         | P    | <b>879.3084</b>  | 440.1578        | 862.2818       | 431.6445         | 861.2978       | 431.1525         | 7  |
| 12 | 1277.5137       | 639.2605        |                |                  | 1259.5031      | 630.2552         | C    | 782.2556         | 391.6314        | 765.2291       | 383.1182         | 764.2450       | 382.6262         | 6  |
| 13 | 1392.5406       | 696.7739        |                |                  | 1374.5300      | 687.7687         | D    | <b>622.2250</b>  | 311.6161        | 605.1984       | 303.1028         | 604.2144       | 302.6108         | 5  |
| 14 | 1552.5713       | 776.7893        |                |                  | 1534.5607      | 767.7840         | C    | <b>507.1980</b>  | 254.1026        | 490.1715       | 245.5894         |                |                  | 4  |
| 15 | 1667.5982       | 834.3027        | 1650.5717      | 825.7895         | 1649.5876      | 825.2975         | N    | 347.1674         | 174.0873        | 330.1408       | 165.5740         |                |                  | 3  |

|    |           |          |           |          |           |          |   |          |          |          |          |  |  |   |
|----|-----------|----------|-----------|----------|-----------|----------|---|----------|----------|----------|----------|--|--|---|
| 16 | 1724.6197 | 862.8135 | 1707.5931 | 854.3002 | 1706.6091 | 853.8082 | G | 232.1404 | 116.5738 | 215.1139 | 108.0606 |  |  | 2 |
| 17 |           |          |           |          |           |          | R | 175.1190 | 88.0631  | 158.0924 | 79.5498  |  |  | 1 |

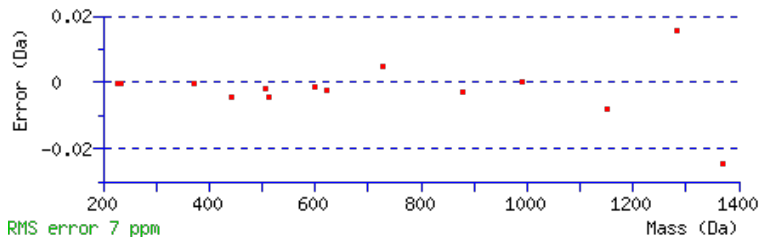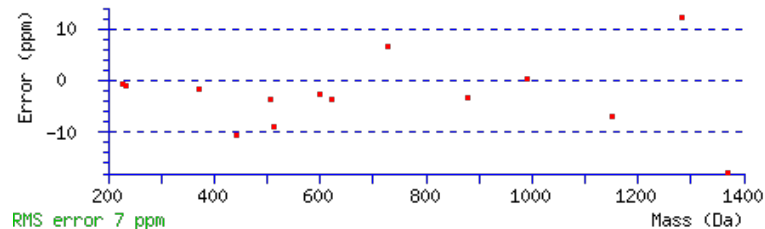

NCBI BLAST search of [ATAESASECLPCDCNGR](#)

(Parameters: blastp, nr protein database, expect=20000, no filter, PAM30)

Other BLAST [web gateways](#)

All matches to this query

| Score | Mr(calc)  | Delta   | Sequence                          |
|-------|-----------|---------|-----------------------------------|
| 67.1  | 1897.7240 | -0.0009 | <a href="#">ATAESASECLPCDCNGR</a> |

Mascot: <http://www.matrixscience.com/>

# Mascot Search Results

## Peptide View

MS/MS Fragmentation of **ATAESASECLPCDCNGR**

Found in **P11047** in **uni\_human\_nr**, LAMC1\_HUMAN Laminin subunit gamma-1 OS=Homo sapiens GN=LAMC1 PE=1 SV=3

Match to Query 6339: 1896.738248 from(949.376400,2+) intensity(4645359.5000) rtinseconds(1299) scans(5791) index(3571)

Title: 130806\_HPL\_Human\_Plaque\_BR1\_TR2\_15\_Spectrum023902\_scans\_5791\_RTINSECONDS=1299

Data file E:\RAW\HumanPlaques\mgf\T\1D\T130806\_HPL\_Human\_Plaque\_BR1\_TR2\_15.mgf

Click mouse within plot area to zoom in by factor of two about that point

Or,  to  Da

Label all possible matches  Label matches used for scoring

Show Y-axis

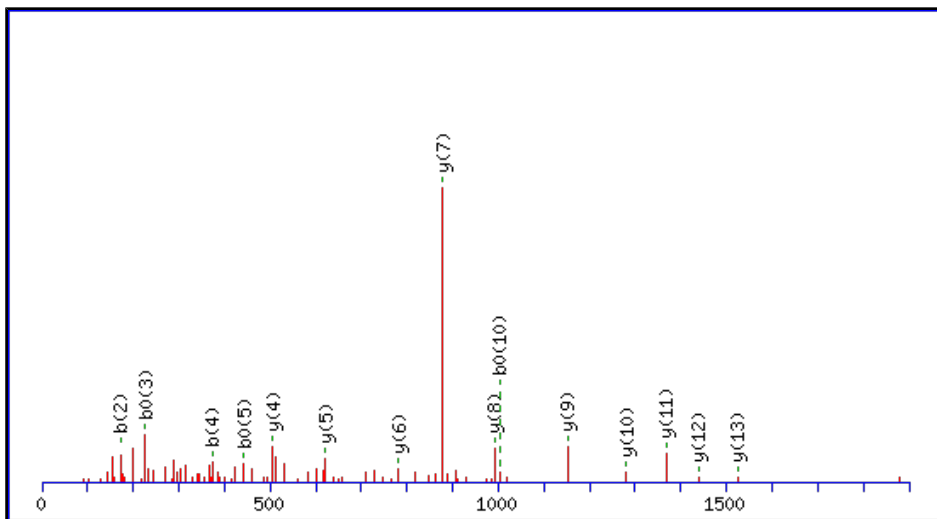

Monoisotopic mass of neutral peptide **Mr(calc):** 1896.7400

Fixed modifications: Carbamidomethyl (C) (apply to specified residues or termini only)

Ions Score: 105 Expect: 1.1e-010

Matches : 15/154 fragment ions using 16 most intense peaks ([help](#))

| #  | b               | b <sup>++</sup> | b*        | b <sup>*++</sup> | b <sup>0</sup>   | b <sup>0++</sup> | Seq. | y                | y <sup>++</sup> | y*        | y <sup>*++</sup> | y <sup>0</sup> | y <sup>0++</sup> | #  |
|----|-----------------|-----------------|-----------|------------------|------------------|------------------|------|------------------|-----------------|-----------|------------------|----------------|------------------|----|
| 1  | 72.0444         | 36.5258         |           |                  |                  |                  | A    |                  |                 |           |                  |                |                  | 17 |
| 2  | <b>173.0921</b> | 87.0497         |           |                  | 155.0815         | 78.0444          | T    | 1826.7102        | 913.8587        | 1809.6837 | 905.3455         | 1808.6996      | 904.8535         | 16 |
| 3  | 244.1292        | 122.5682        |           |                  | <b>226.1186</b>  | 113.5629         | A    | 1725.6625        | 863.3349        | 1708.6360 | 854.8216         | 1707.6520      | 854.3296         | 15 |
| 4  | <b>373.1718</b> | 187.0895        |           |                  | 355.1612         | 178.0842         | E    | 1654.6254        | 827.8163        | 1637.5989 | 819.3031         | 1636.6149      | 818.8111         | 14 |
| 5  | 460.2038        | 230.6055        |           |                  | <b>442.1932</b>  | 221.6003         | S    | <b>1525.5828</b> | 763.2950        | 1508.5563 | 754.7818         | 1507.5723      | 754.2898         | 13 |
| 6  | 531.2409        | 266.1241        |           |                  | 513.2304         | 257.1188         | A    | <b>1438.5508</b> | 719.7790        | 1421.5242 | 711.2658         | 1420.5402      | 710.7738         | 12 |
| 7  | 618.2729        | 309.6401        |           |                  | 600.2624         | 300.6348         | S    | <b>1367.5137</b> | 684.2605        | 1350.4871 | 675.7472         | 1349.5031      | 675.2552         | 11 |
| 8  | 747.3155        | 374.1614        |           |                  | 729.3050         | 365.1561         | E    | <b>1280.4817</b> | 640.7445        | 1263.4551 | 632.2312         | 1262.4711      | 631.7392         | 10 |
| 9  | 907.3462        | 454.1767        |           |                  | 889.3356         | 445.1714         | C    | <b>1151.4391</b> | 576.2232        | 1134.4125 | 567.7099         | 1133.4285      | 567.2179         | 9  |
| 10 | 1020.4303       | 510.7188        |           |                  | <b>1002.4197</b> | 501.7135         | L    | <b>991.4084</b>  | 496.2078        | 974.3819  | 487.6946         | 973.3978       | 487.2026         | 8  |
| 11 | 1117.4830       | 559.2451        |           |                  | 1099.4725        | 550.2399         | P    | <b>878.3243</b>  | 439.6658        | 861.2978  | 431.1525         | 860.3138       | 430.6605         | 7  |
| 12 | 1277.5137       | 639.2605        |           |                  | 1259.5031        | 630.2552         | C    | <b>781.2716</b>  | 391.1394        | 764.2450  | 382.6262         | 763.2610       | 382.1341         | 6  |
| 13 | 1392.5406       | 696.7739        |           |                  | 1374.5300        | 687.7687         | D    | <b>621.2409</b>  | 311.1241        | 604.2144  | 302.6108         | 603.2304       | 302.1188         | 5  |
| 14 | 1552.5713       | 776.7893        |           |                  | 1534.5607        | 767.7840         | C    | <b>506.2140</b>  | 253.6106        | 489.1874  | 245.0974         |                |                  | 4  |
| 15 | 1666.6142       | 833.8107        | 1649.5876 | 825.2975         | 1648.6036        | 824.8054         | N    | 346.1833         | 173.5953        | 329.1568  | 165.0820         |                |                  | 3  |
| 16 | 1723.6356       | 862.3215        | 1706.6091 | 853.8082         | 1705.6251        | 853.3162         | G    | 232.1404         | 116.5738        | 215.1139  | 108.0606         |                |                  | 2  |

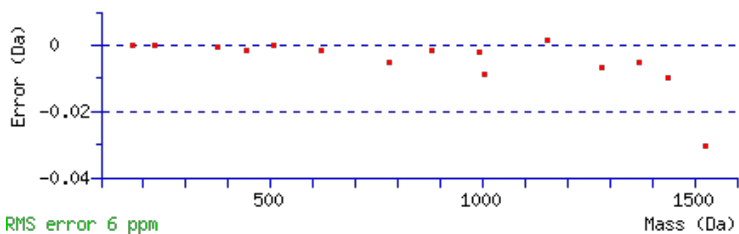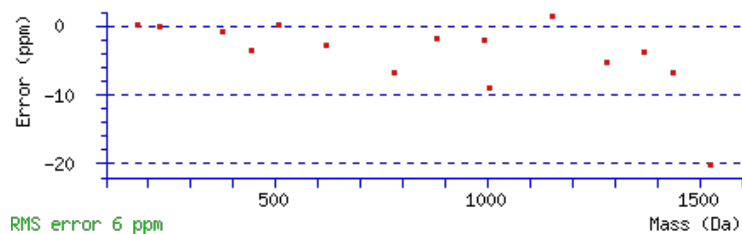

NCBI BLAST search of [ATAESASECLPCDCNGR](#)

(Parameters: blastp, nr protein database, expect=20000, no filter, PAM30)

Other BLAST [web gateways](#)

All matches to this query

| Score | Mr(calc)  | Delta   | Sequence                          |
|-------|-----------|---------|-----------------------------------|
| 105.3 | 1896.7400 | -0.0018 | <a href="#">ATAESASECLPCDCNGR</a> |

Mascot: <http://www.matrixscience.com/>

# Mascot Search Results

## Peptide View

MS/MS Fragmentation of **ATAESASECLPCDCNGR**

Found in **P11047** in **uni\_human\_nr**, LAMC1\_HUMAN Laminin subunit gamma-1 OS=Homo sapiens GN=LAMC1 PE=1 SV=3

Match to Query 6251: 1896.739332 from(633.253720,3+) intensity(1366721.5000) rtinseconds(1290) scans(5802) index(3614)

Title: 130806\_HPL\_Human\_Plaque\_BR1\_TR2\_14\_Spectrum024365\_scans\_5802\_RTINSECONDS=1290

Data file E:\RAW\HumanPlaques\mgf\T\1D\T130806\_HPL\_Human\_Plaque\_BR1\_TR2\_14.mgf

Click mouse within plot area to zoom in by factor of two about that point

Or,  to  Da

Label all possible matches  Label matches used for scoring

Show Y-axis

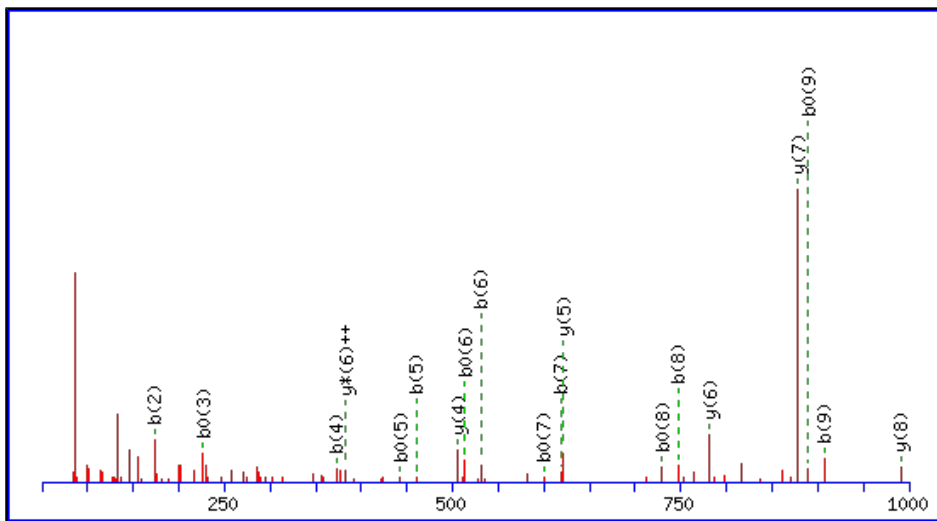

Monoisotopic mass of neutral peptide **Mr(calc)**: 1896.7400

Fixed modifications: Carbamidomethyl (C) (apply to specified residues or termini only)

Ions Score: 58 Expect: 6.8e-006

Matches : 19/154 fragment ions using 28 most intense peaks ([help](#))

| #  | b               | b <sup>++</sup> | b <sup>*</sup> | b <sup>*++</sup> | b <sup>0</sup>  | b <sup>0++</sup> | Seq. | y               | y <sup>++</sup> | y <sup>*</sup> | y <sup>*++</sup> | y <sup>0</sup> | y <sup>0++</sup> | #  |
|----|-----------------|-----------------|----------------|------------------|-----------------|------------------|------|-----------------|-----------------|----------------|------------------|----------------|------------------|----|
| 1  | 72.0444         | 36.5258         |                |                  |                 |                  | A    |                 |                 |                |                  |                |                  | 17 |
| 2  | <b>173.0921</b> | 87.0497         |                |                  | 155.0815        | 78.0444          | T    | 1826.7102       | 913.8587        | 1809.6837      | 905.3455         | 1808.6996      | 904.8535         | 16 |
| 3  | 244.1292        | 122.5682        |                |                  | <b>226.1186</b> | 113.5629         | A    | 1725.6625       | 863.3349        | 1708.6360      | 854.8216         | 1707.6520      | 854.3296         | 15 |
| 4  | <b>373.1718</b> | 187.0895        |                |                  | 355.1612        | 178.0842         | E    | 1654.6254       | 827.8163        | 1637.5989      | 819.3031         | 1636.6149      | 818.8111         | 14 |
| 5  | <b>460.2038</b> | 230.6055        |                |                  | <b>442.1932</b> | 221.6003         | S    | 1525.5828       | 763.2950        | 1508.5563      | 754.7818         | 1507.5723      | 754.2898         | 13 |
| 6  | <b>531.2409</b> | 266.1241        |                |                  | <b>513.2304</b> | 257.1188         | A    | 1438.5508       | 719.7790        | 1421.5242      | 711.2658         | 1420.5402      | 710.7738         | 12 |
| 7  | <b>618.2729</b> | 309.6401        |                |                  | <b>600.2624</b> | 300.6348         | S    | 1367.5137       | 684.2605        | 1350.4871      | 675.7472         | 1349.5031      | 675.2552         | 11 |
| 8  | <b>747.3155</b> | 374.1614        |                |                  | <b>729.3050</b> | 365.1561         | E    | 1280.4817       | 640.7445        | 1263.4551      | 632.2312         | 1262.4711      | 631.7392         | 10 |
| 9  | <b>907.3462</b> | 454.1767        |                |                  | <b>889.3356</b> | 445.1714         | C    | 1151.4391       | 576.2232        | 1134.4125      | 567.7099         | 1133.4285      | 567.2179         | 9  |
| 10 | 1020.4303       | 510.7188        |                |                  | 1002.4197       | 501.7135         | L    | <b>991.4084</b> | 496.2078        | 974.3819       | 487.6946         | 973.3978       | 487.2026         | 8  |
| 11 | 1117.4830       | 559.2451        |                |                  | 1099.4725       | 550.2399         | P    | <b>878.3243</b> | 439.6658        | 861.2978       | 431.1525         | 860.3138       | 430.6605         | 7  |
| 12 | 1277.5137       | 639.2605        |                |                  | 1259.5031       | 630.2552         | C    | <b>781.2716</b> | 391.1394        | 764.2450       | <b>382.6262</b>  | 763.2610       | 382.1341         | 6  |
| 13 | 1392.5406       | 696.7739        |                |                  | 1374.5300       | 687.7687         | D    | <b>621.2409</b> | 311.1241        | 604.2144       | 302.6108         | 603.2304       | 302.1188         | 5  |
| 14 | 1552.5713       | 776.7893        |                |                  | 1534.5607       | 767.7840         | C    | <b>506.2140</b> | 253.6106        | 489.1874       | 245.0974         |                |                  | 4  |
| 15 | 1666.6142       | 833.8107        | 1649.5876      | 825.2975         | 1648.6036       | 824.8054         | N    | 346.1833        | 173.5953        | 329.1568       | 165.0820         |                |                  | 3  |
| 16 | 1723.6356       | 862.3215        | 1706.6091      | 853.8082         | 1705.6251       | 853.3162         | G    | 232.1404        | 116.5738        | 215.1139       | 108.0606         |                |                  | 2  |



**17** | | | | | | | | **R** | 175.1190 | 88.0631 | 158.0924 | 79.5498 | | | **1**

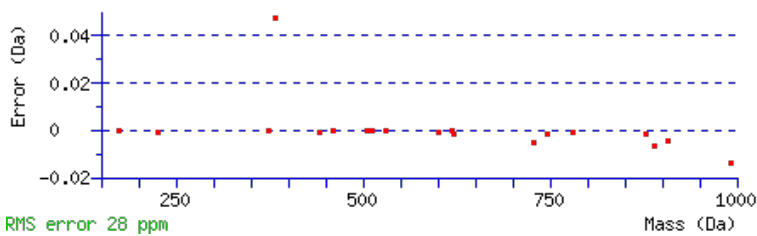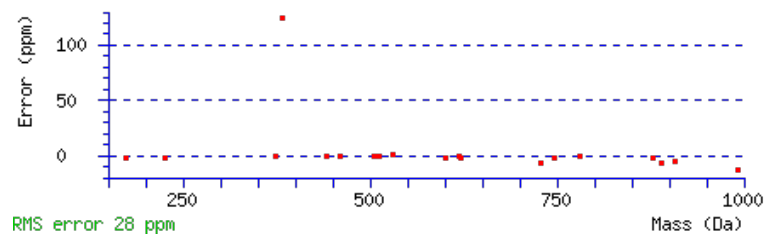

NCBI **BLAST** search of [ATAESASECLPCDCNGR](#)

(Parameters: blastp, nr protein database, expect=20000, no filter, PAM30)

Other BLAST [web gateways](#)

**All matches to this query**

| Score | Mr(calc)  | Delta   | Sequence                          |
|-------|-----------|---------|-----------------------------------|
| 57.9  | 1896.7400 | -0.0007 | <a href="#">ATAESASECLPCDCNGR</a> |

Mascot: <http://www.matrixscience.com/>

# Mascot Search Results

## Peptide View

MS/MS Fragmentation of **RATAESASECLPCDCNGR**

Found in **P11047** in **uni\_human\_nr**, LAMC1\_HUMAN Laminin subunit gamma-1 OS=Homo sapiens GN=LAMC1 PE=1 SV=3

Match to Query 6963: 2053.824252 from(685.615360,3+) intensity(226995.8438) rtinseconds(1174) scans(4879) index(2661)

Title: 130801\_HPL\_Human\_Plaque\_BR1\_TR1\_14\_Spectrum023162\_scans\_4879\_RTINSECONDS=1174

Data file E:\RAW\HumanPlaques\mgf\T\1D\T130801\_HPL\_Human\_Plaque\_BR1\_TR1\_14.mgf

Click mouse within plot area to zoom in by factor of two about that point

Or,  to  Da

Label all possible matches  Label matches used for scoring

Show Y-axis

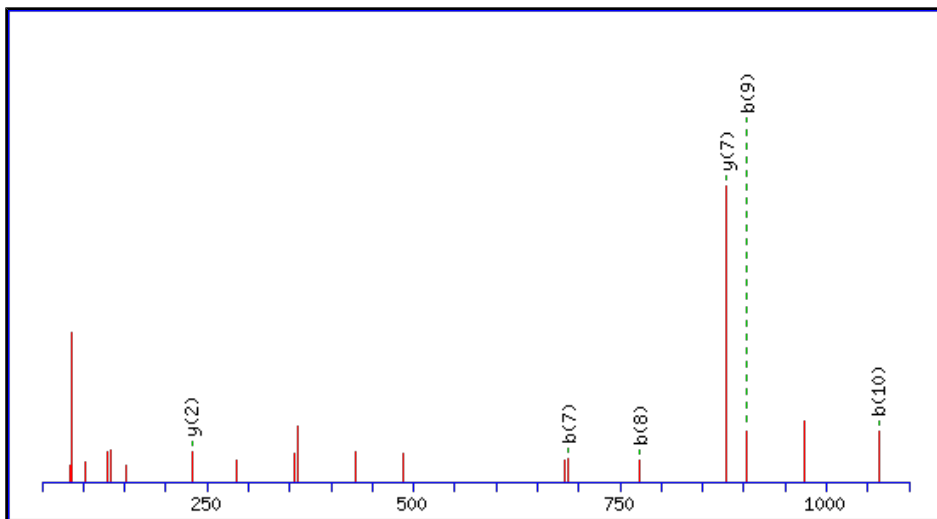

**Monoisotopic mass of neutral peptide Mr(calc):** 2053.8252

**Fixed modifications:** Carbamidomethyl (C) (apply to specified residues or termini only)

**Variable modifications:**

N16 : Deamidated (NQ)

**Ions Score:** 17 **Expect:** 0.15

**Matches :** 6/192 fragment ions using 15 most intense peaks ([help](#))

| #  | b                | b <sup>++</sup> | b <sup>*</sup> | b <sup>*++</sup> | b <sup>0</sup> | b <sup>0++</sup> | Seq. | y               | y <sup>++</sup> | y <sup>*</sup> | y <sup>*++</sup> | y <sup>0</sup> | y <sup>0++</sup> | #  |
|----|------------------|-----------------|----------------|------------------|----------------|------------------|------|-----------------|-----------------|----------------|------------------|----------------|------------------|----|
| 1  | 157.1084         | 79.0578         | 140.0818       | 70.5446          |                |                  | R    |                 |                 |                |                  |                |                  | 18 |
| 2  | 228.1455         | 114.5764        | 211.1190       | 106.0631         |                |                  | A    | 1898.7313       | 949.8693        | 1881.7048      | 941.3560         | 1880.7208      | 940.8640         | 17 |
| 3  | 329.1932         | 165.1002        | 312.1666       | 156.5870         | 311.1826       | 156.0949         | T    | 1827.6942       | 914.3508        | 1810.6677      | 905.8375         | 1809.6837      | 905.3455         | 16 |
| 4  | 400.2303         | 200.6188        | 383.2037       | 192.1055         | 382.2197       | 191.6135         | A    | 1726.6465       | 863.8269        | 1709.6200      | 855.3136         | 1708.6360      | 854.8216         | 15 |
| 5  | 529.2729         | 265.1401        | 512.2463       | 256.6268         | 511.2623       | 256.1348         | E    | 1655.6094       | 828.3084        | 1638.5829      | 819.7951         | 1637.5989      | 819.3031         | 14 |
| 6  | 616.3049         | 308.6561        | 599.2784       | 300.1428         | 598.2944       | 299.6508         | S    | 1526.5668       | 763.7871        | 1509.5403      | 755.2738         | 1508.5563      | 754.7818         | 13 |
| 7  | <b>687.3420</b>  | 344.1747        | 670.3155       | 335.6614         | 669.3315       | 335.1694         | A    | 1439.5348       | 720.2710        | 1422.5083      | 711.7578         | 1421.5242      | 711.2658         | 12 |
| 8  | <b>774.3741</b>  | 387.6907        | 757.3475       | 379.1774         | 756.3635       | 378.6854         | S    | 1368.4977       | 684.7525        | 1351.4711      | 676.2392         | 1350.4871      | 675.7472         | 11 |
| 9  | <b>903.4167</b>  | 452.2120        | 886.3901       | 443.6987         | 885.4061       | 443.2067         | E    | 1281.4657       | 641.2365        | 1264.4391      | 632.7232         | 1263.4551      | 632.2312         | 10 |
| 10 | <b>1063.4473</b> | 532.2273        | 1046.4208      | 523.7140         | 1045.4367      | 523.2220         | C    | 1152.4231       | 576.7152        | 1135.3965      | 568.2019         | 1134.4125      | 567.7099         | 9  |
| 11 | 1176.5314        | 588.7693        | 1159.5048      | 580.2560         | 1158.5208      | 579.7640         | L    | 992.3924        | 496.6999        | 975.3659       | 488.1866         | 974.3819       | 487.6946         | 8  |
| 12 | 1273.5841        | 637.2957        | 1256.5576      | 628.7824         | 1255.5736      | 628.2904         | P    | <b>879.3084</b> | 440.1578        | 862.2818       | 431.6445         | 861.2978       | 431.1525         | 7  |
| 13 | 1433.6148        | 717.3110        | 1416.5882      | 708.7978         | 1415.6042      | 708.3057         | C    | 782.2556        | 391.6314        | 765.2291       | 383.1182         | 764.2450       | 382.6262         | 6  |
| 14 | 1548.6417        | 774.8245        | 1531.6152      | 766.3112         | 1530.6312      | 765.8192         | D    | 622.2250        | 311.6161        | 605.1984       | 303.1028         | 604.2144       | 302.6108         | 5  |
| 15 | 1708.6724        | 854.8398        | 1691.6458      | 846.3265         | 1690.6618      | 845.8345         | C    | 507.1980        | 254.1026        | 490.1715       | 245.5894         |                |                  | 4  |

|    |           |          |           |          |           |          |   |                 |          |          |          |  |  |   |
|----|-----------|----------|-----------|----------|-----------|----------|---|-----------------|----------|----------|----------|--|--|---|
| 16 | 1823.6993 | 912.3533 | 1806.6728 | 903.8400 | 1805.6887 | 903.3480 | N | 347.1674        | 174.0873 | 330.1408 | 165.5740 |  |  | 3 |
| 17 | 1880.7208 | 940.8640 | 1863.6942 | 932.3508 | 1862.7102 | 931.8587 | G | <b>232.1404</b> | 116.5738 | 215.1139 | 108.0606 |  |  | 2 |
| 18 |           |          |           |          |           |          | R | 175.1190        | 88.0631  | 158.0924 | 79.5498  |  |  | 1 |

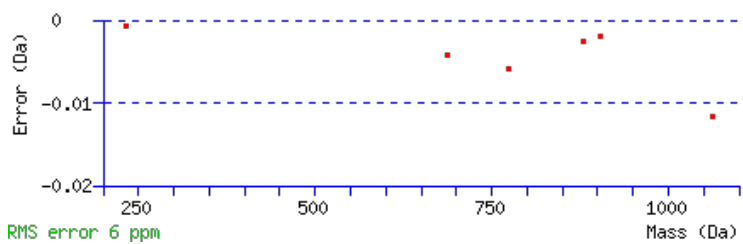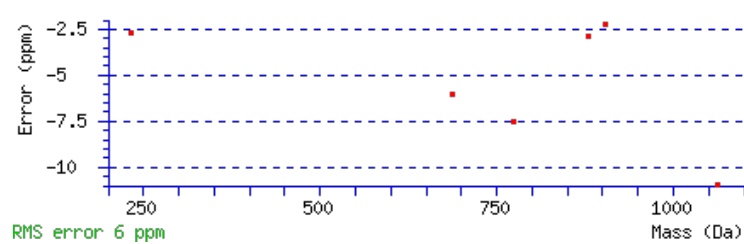

NCBI BLAST search of [RATAESASECLPCDCNGR](#)  
 (Parameters: blastp, nr protein database, expect=20000, no filter, PAM30)  
 Other BLAST [web gateways](#)

All matches to this query

| Score | Mr(calc)  | Delta   | Sequence                           |
|-------|-----------|---------|------------------------------------|
| 16.8  | 2053.8252 | -0.0009 | <a href="#">RATAESASECLPCDCNGR</a> |

Mascot: <http://www.matrixscience.com/>

# Mascot Search Results

## Peptide View

MS/MS Fragmentation of **RATAESASECLPCDCNGR**

Found in **P11047** in **uni\_human\_nr**, LAMC1\_HUMAN Laminin subunit gamma-1 OS=Homo sapiens GN=LAMC1 PE=1 SV=3

Match to Query 7946: 2052.841512 from(685.287780,3+) intensity(5531704.5000) rtinseconds(1094) scans(4579) index(2665)

Title: 130806\_HPL\_Human\_Plaque\_BR2\_TR2\_09\_Spectrum023887\_scans\_4579\_RTINSECONDS=1094

Data file E:\RAW\HumanPlaques\mgf\T\1D\T130806\_HPL\_Human\_Plaque\_BR2\_TR2\_09.mgf

Click mouse within plot area to zoom in by factor of two about that point

Or,  to  Da

Label all possible matches  Label matches used for scoring

Show Y-axis

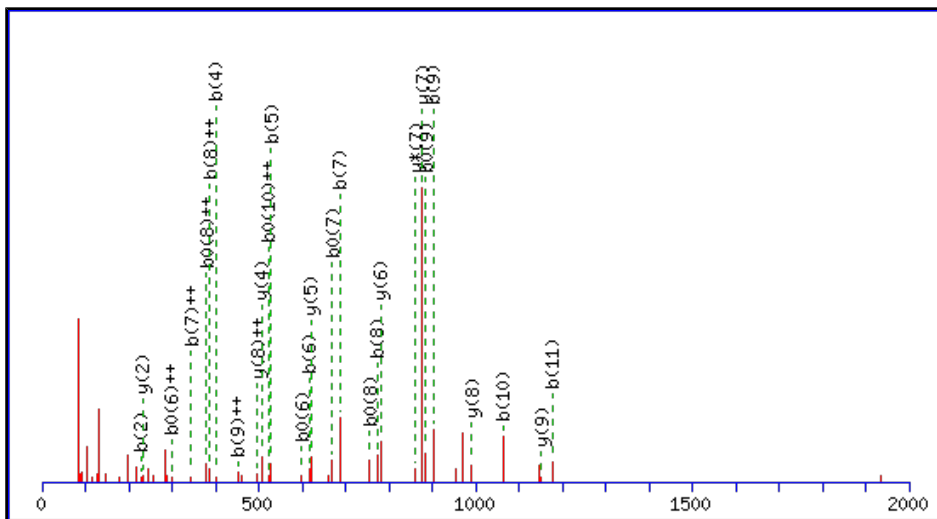

Monoisotopic mass of neutral peptide **Mr(calc)**: 2052.8411

Fixed modifications: Carbamidomethyl (C) (apply to specified residues or termini only)

Ions Score: 58 Expect: 1.6e-005

Matches : 28/192 fragment ions using 52 most intense peaks ([help](#))

| #  | b                | b <sup>++</sup> | b <sup>*</sup> | b <sup>*++</sup> | b <sup>0</sup>  | b <sup>0++</sup> | Seq. | y                | y <sup>++</sup> | y <sup>*</sup>  | y <sup>*++</sup> | y <sup>0</sup> | y <sup>0++</sup> | #  |
|----|------------------|-----------------|----------------|------------------|-----------------|------------------|------|------------------|-----------------|-----------------|------------------|----------------|------------------|----|
| 1  | 157.1084         | 79.0578         | 140.0818       | 70.5446          |                 |                  | R    |                  |                 |                 |                  |                |                  | 18 |
| 2  | <b>228.1455</b>  | 114.5764        | 211.1190       | 106.0631         |                 |                  | A    | 1897.7473        | 949.3773        | 1880.7208       | 940.8640         | 1879.7368      | 940.3720         | 17 |
| 3  | 329.1932         | 165.1002        | 312.1666       | 156.5870         | 311.1826        | 156.0949         | T    | 1826.7102        | 913.8587        | 1809.6837       | 905.3455         | 1808.6996      | 904.8535         | 16 |
| 4  | <b>400.2303</b>  | 200.6188        | 383.2037       | 192.1055         | 382.2197        | 191.6135         | A    | 1725.6625        | 863.3349        | 1708.6360       | 854.8216         | 1707.6520      | 854.3296         | 15 |
| 5  | <b>529.2729</b>  | 265.1401        | 512.2463       | 256.6268         | 511.2623        | 256.1348         | E    | 1654.6254        | 827.8163        | 1637.5989       | 819.3031         | 1636.6149      | 818.8111         | 14 |
| 6  | <b>616.3049</b>  | 308.6561        | 599.2784       | 300.1428         | <b>598.2944</b> | <b>299.6508</b>  | S    | 1525.5828        | 763.2950        | 1508.5563       | 754.7818         | 1507.5723      | 754.2898         | 13 |
| 7  | <b>687.3420</b>  | <b>344.1747</b> | 670.3155       | 335.6614         | <b>669.3315</b> | 335.1694         | A    | 1438.5508        | 719.7790        | 1421.5242       | 711.2658         | 1420.5402      | 710.7738         | 12 |
| 8  | <b>774.3741</b>  | <b>387.6907</b> | 757.3475       | 379.1774         | <b>756.3635</b> | <b>378.6854</b>  | S    | 1367.5137        | 684.2605        | 1350.4871       | 675.7472         | 1349.5031      | 675.2552         | 11 |
| 9  | <b>903.4167</b>  | <b>452.2120</b> | 886.3901       | 443.6987         | <b>885.4061</b> | 443.2067         | E    | 1280.4817        | 640.7445        | 1263.4551       | 632.2312         | 1262.4711      | 631.7392         | 10 |
| 10 | <b>1063.4473</b> | 532.2273        | 1046.4208      | 523.7140         | 1045.4367       | <b>523.2220</b>  | C    | <b>1151.4391</b> | 576.2232        | 1134.4125       | 567.7099         | 1133.4285      | 567.2179         | 9  |
| 11 | <b>1176.5314</b> | 588.7693        | 1159.5048      | 580.2560         | 1158.5208       | 579.7640         | L    | <b>991.4084</b>  | <b>496.2078</b> | 974.3819        | 487.6946         | 973.3978       | 487.2026         | 8  |
| 12 | 1273.5841        | 637.2957        | 1256.5576      | 628.7824         | 1255.5736       | 628.2904         | P    | <b>878.3243</b>  | 439.6658        | <b>861.2978</b> | 431.1525         | 860.3138       | 430.6605         | 7  |
| 13 | 1433.6148        | 717.3110        | 1416.5882      | 708.7978         | 1415.6042       | 708.3057         | C    | <b>781.2716</b>  | 391.1394        | 764.2450        | 382.6262         | 763.2610       | 382.1341         | 6  |
| 14 | 1548.6417        | 774.8245        | 1531.6152      | 766.3112         | 1530.6312       | 765.8192         | D    | <b>621.2409</b>  | 311.1241        | 604.2144        | 302.6108         | 603.2304       | 302.1188         | 5  |
| 15 | 1708.6724        | 854.8398        | 1691.6458      | 846.3265         | 1690.6618       | 845.8345         | C    | <b>506.2140</b>  | 253.6106        | 489.1874        | 245.0974         |                |                  | 4  |
| 16 | 1822.7153        | 911.8613        | 1805.6887      | 903.3480         | 1804.7047       | 902.8560         | N    | 346.1833         | 173.5953        | 329.1568        | 165.0820         |                |                  | 3  |

|    |           |          |           |          |           |          |   |          |          |          |          |  |  |   |
|----|-----------|----------|-----------|----------|-----------|----------|---|----------|----------|----------|----------|--|--|---|
| 17 | 1879.7368 | 940.3720 | 1862.7102 | 931.8587 | 1861.7262 | 931.3667 | G | 232.1404 | 116.5738 | 215.1139 | 108.0606 |  |  | 2 |
| 18 |           |          |           |          |           |          | R | 175.1190 | 88.0631  | 158.0924 | 79.5498  |  |  | 1 |

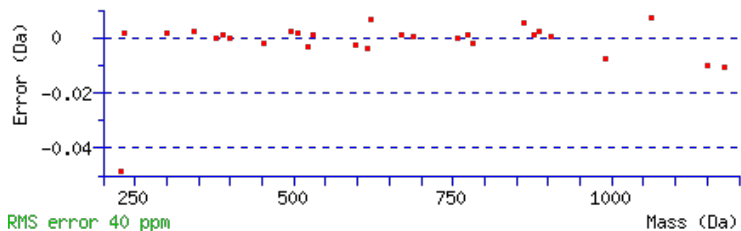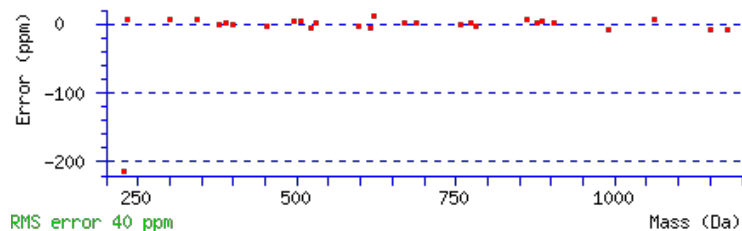

NCBI BLAST search of [RATAESASECLPCDCNGR](#)

(Parameters: blastp, nr protein database, expect=20000, no filter, PAM30)

Other BLAST [web gateways](#)

All matches to this query

| Score | Mr(calc)  | Delta  | Sequence                           |
|-------|-----------|--------|------------------------------------|
| 57.7  | 2052.8411 | 0.0004 | <a href="#">RATAESASECLPCDCNGR</a> |

Mascot: <http://www.matrixscience.com/>

# Mascot Search Results

## Peptide View

MS/MS Fragmentation of **LSVGSVYRPNQNGR**

Found in **Q08397** in **uni\_human\_nr**, LOXL1\_HUMAN Lysyl oxidase homolog 1 OS=Homo sapiens GN=LOXL1 PE=1 SV=2

Match to Query 4440: 1546.784862 from(516.602230,3+) intensity(2036954.6250) rtinseconds(1313) scans(6372) index(4169)

Title: 130801\_HPL\_Human\_Plaque\_BR1\_TR1\_03\_Spectrum027419\_scans\_6372\_RTINSECONDS=1313

Data file E:\RAW\HumanPlaques\mgf\T\1D\T130801\_HPL\_Human\_Plaque\_BR1\_TR1\_03.mgf

Click mouse within plot area to zoom in by factor of two about that point

Or,  to  Da

Label all possible matches  Label matches used for scoring

Show Y-axis

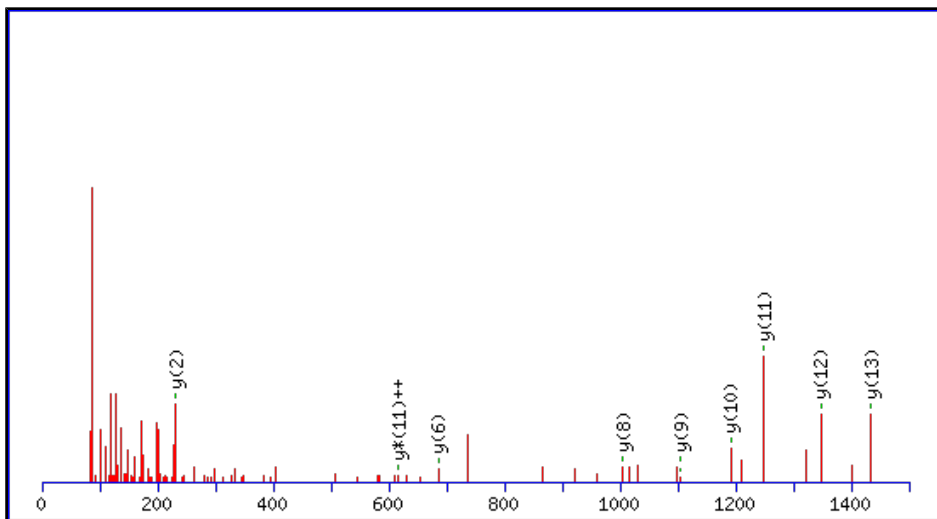

**Monoisotopic mass of neutral peptide Mr(calc):** 1546.7852

**Fixed modifications:** Carbamidomethyl (C) (apply to specified residues or termini only)

**Variable modifications:**

N12 : Deamidated (NQ)

**Ions Score:** 35 **Expect:** 0.029

**Matches :** 9/122 fragment ions using 27 most intense peaks ([help](#))

| #  | b         | b <sup>++</sup> | b <sup>*</sup> | b <sup>*++</sup> | b <sup>0</sup> | b <sup>0++</sup> | Seq. | y                | y <sup>++</sup> | y <sup>*</sup> | y <sup>*++</sup> | y <sup>0</sup> | y <sup>0++</sup> | #  |
|----|-----------|-----------------|----------------|------------------|----------------|------------------|------|------------------|-----------------|----------------|------------------|----------------|------------------|----|
| 1  | 114.0913  | 57.5493         |                |                  |                |                  | L    |                  |                 |                |                  |                |                  | 14 |
| 2  | 201.1234  | 101.0653        |                |                  | 183.1128       | 92.0600          | S    | <b>1434.7084</b> | 717.8578        | 1417.6819      | 709.3446         | 1416.6979      | 708.8526         | 13 |
| 3  | 300.1918  | 150.5995        |                |                  | 282.1812       | 141.5942         | V    | <b>1347.6764</b> | 674.3418        | 1330.6498      | 665.8286         | 1329.6658      | 665.3365         | 12 |
| 4  | 357.2132  | 179.1103        |                |                  | 339.2027       | 170.1050         | G    | <b>1248.6080</b> | 624.8076        | 1231.5814      | <b>616.2944</b>  | 1230.5974      | 615.8023         | 11 |
| 5  | 444.2453  | 222.6263        |                |                  | 426.2347       | 213.6210         | S    | <b>1191.5865</b> | 596.2969        | 1174.5600      | 587.7836         | 1173.5759      | 587.2916         | 10 |
| 6  | 543.3137  | 272.1605        |                |                  | 525.3031       | 263.1552         | V    | <b>1104.5545</b> | 552.7809        | 1087.5279      | 544.2676         |                |                  | 9  |
| 7  | 706.3770  | 353.6921        |                |                  | 688.3665       | 344.6869         | Y    | <b>1005.4861</b> | 503.2467        | 988.4595       | 494.7334         |                |                  | 8  |
| 8  | 862.4781  | 431.7427        | 845.4516       | 423.2294         | 844.4676       | 422.7374         | R    | 842.4227         | 421.7150        | 825.3962       | 413.2017         |                |                  | 7  |
| 9  | 959.5309  | 480.2691        | 942.5043       | 471.7558         | 941.5203       | 471.2638         | P    | <b>686.3216</b>  | 343.6645        | 669.2951       | 335.1512         |                |                  | 6  |
| 10 | 1073.5738 | 537.2905        | 1056.5473      | 528.7773         | 1055.5633      | 528.2853         | N    | 589.2689         | 295.1381        | 572.2423       | 286.6248         |                |                  | 5  |
| 11 | 1201.6324 | 601.3198        | 1184.6058      | 592.8066         | 1183.6218      | 592.3146         | Q    | 475.2259         | 238.1166        | 458.1994       | 229.6033         |                |                  | 4  |
| 12 | 1316.6593 | 658.8333        | 1299.6328      | 650.3200         | 1298.6488      | 649.8280         | N    | 347.1674         | 174.0873        | 330.1408       | 165.5740         |                |                  | 3  |
| 13 | 1373.6808 | 687.3440        | 1356.6543      | 678.8308         | 1355.6702      | 678.3388         | G    | <b>232.1404</b>  | 116.5738        | 215.1139       | 108.0606         |                |                  | 2  |
| 14 |           |                 |                |                  |                |                  | R    | 175.1190         | 88.0631         | 158.0924       | 79.5498          |                |                  | 1  |

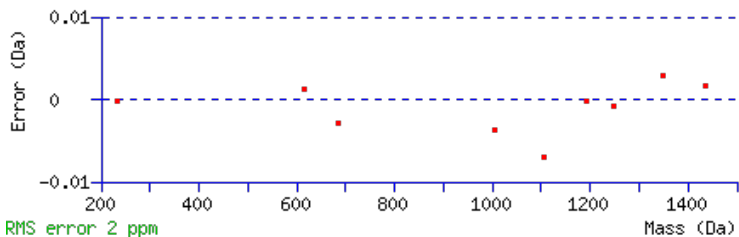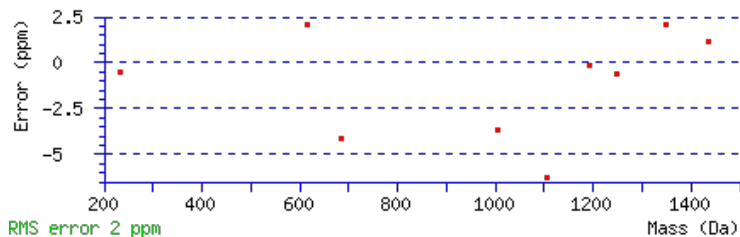

NCBI BLAST search of [LSVGSVYRPNQNGR](#)

(Parameters: blastp, nr protein database, expect=20000, no filter, PAM30)

Other BLAST [web gateways](#)

**All matches to this query**

| Score | Mr(calc)  | Delta   | Sequence                       | Site Analysis         |
|-------|-----------|---------|--------------------------------|-----------------------|
| 34.5  | 1546.7852 | -0.0003 | <a href="#">LSVGSVYRPNQNGR</a> | Deamidated N12 33.33% |
| 34.5  | 1546.7852 | -0.0003 | <a href="#">LSVGSVYRPNQNGR</a> | Deamidated Q11 33.33% |
| 34.5  | 1546.7852 | -0.0003 | <a href="#">LSVGSVYRPNQNGR</a> | Deamidated N10 33.33% |

Mascot: <http://www.matrixscience.com/>

# Mascot Search Results

## Peptide View

MS/MS Fragmentation of **LSVGSVYRPNQNGRGLPDLVPDPNYVQASTYVQR**

Found in **Q08397** in **uni\_human\_nr**, LOXL1\_HUMAN Lysyl oxidase homolog 1 OS=Homo sapiens GN=LOXL1 PE=1 SV=2

Match to Query 16302: 3762.876416 from(941.726380,4+) intensity(351759.3125) rtinseconds(2845) scans(16494) index(12665)

Title: 130801\_HPL\_Human\_Plaque\_BR2\_TR1\_09\_Spectrum033477\_scans\_\_16494\_RTINSECONDS=2845

Data file E:\\RAW\\HumanPlaques\\imgf\\T\\1D\\T130801\_HPL\_Human\_Plaque\_BR2\_TR1\_09.mgf

Click mouse within plot area to zoom in by factor of two about that point

Or,  to  Da  
 Label all possible matches  Label matches used for scoring   
 Show Y-axis

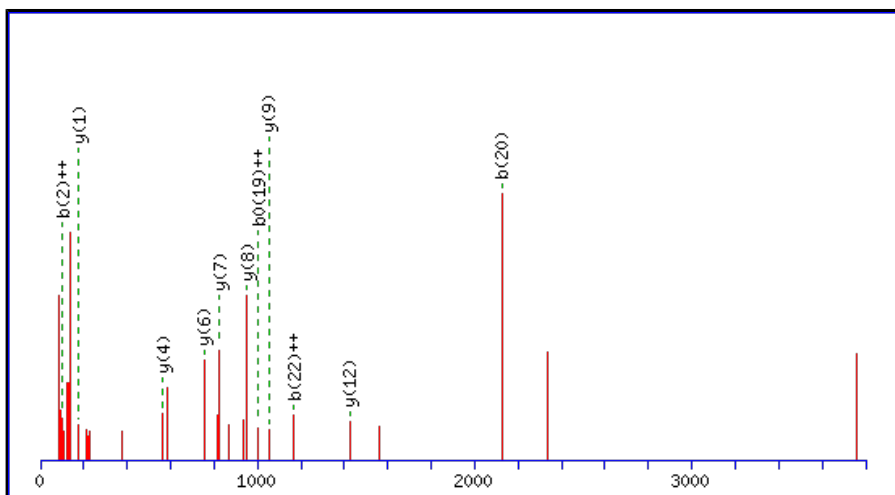

Monoisotopic mass of neutral peptide Mr(calc): 3761.8649

Fixed modifications: Carbamidomethyl (C) (apply to specified residues or termini only)

Variable modifications:

Q11 : Deamidated (NQ)

N12 : Deamidated (NQ)

N24 : Deamidated (NQ)

Ions Score: 23 Expect: 0.43

Matches : 11/372 fragment ions using 27 most intense peaks ([help](#))

| #  | b         | b <sup>++</sup> | b <sup>*</sup> | b <sup>***</sup> | b <sup>0</sup> | b <sup>0++</sup> | Seq. | y         | y <sup>++</sup> | y <sup>*</sup> | y <sup>***</sup> | y <sup>0</sup> | y <sup>0++</sup> | #  |
|----|-----------|-----------------|----------------|------------------|----------------|------------------|------|-----------|-----------------|----------------|------------------|----------------|------------------|----|
| 1  | 114.0913  | 57.5493         |                |                  |                |                  | L    |           |                 |                |                  |                |                  | 34 |
| 2  | 201.1234  | <b>101.0653</b> |                |                  | 183.1128       | 92.0600          | S    | 3649.7881 | 1825.3977       | 3632.7616      | 1816.8844        | 3631.7776      | 1816.3924        | 33 |
| 3  | 300.1918  | 150.5995        |                |                  | 282.1812       | 141.5942         | V    | 3562.7561 | 1781.8817       | 3545.7296      | 1773.3684        | 3544.7455      | 1772.8764        | 32 |
| 4  | 357.2132  | 179.1103        |                |                  | 339.2027       | 170.1050         | G    | 3463.6877 | 1732.3475       | 3446.6611      | 1723.8342        | 3445.6771      | 1723.3422        | 31 |
| 5  | 444.2453  | 222.6263        |                |                  | 426.2347       | 213.6210         | S    | 3406.6662 | 1703.8368       | 3389.6397      | 1695.3235        | 3388.6557      | 1694.8315        | 30 |
| 6  | 543.3137  | 272.1605        |                |                  | 525.3031       | 263.1552         | V    | 3319.6342 | 1660.3207       | 3302.6076      | 1651.8075        | 3301.6236      | 1651.3155        | 29 |
| 7  | 706.3770  | 353.6921        |                |                  | 688.3665       | 344.6869         | Y    | 3220.5658 | 1610.7865       | 3203.5392      | 1602.2733        | 3202.5552      | 1601.7812        | 28 |
| 8  | 862.4781  | 431.7427        | 845.4516       | 423.2294         | 844.4676       | 422.7374         | R    | 3057.5025 | 1529.2549       | 3040.4759      | 1520.7416        | 3039.4919      | 1520.2496        | 27 |
| 9  | 959.5309  | 480.2691        | 942.5043       | 471.7558         | 941.5203       | 471.2638         | P    | 2901.4013 | 1451.2043       | 2884.3748      | 1442.6910        | 2883.3908      | 1442.1990        | 26 |
| 10 | 1073.5738 | 537.2905        | 1056.5473      | 528.7773         | 1055.5633      | 528.2853         | N    | 2804.3486 | 1402.6779       | 2787.3220      | 1394.1647        | 2786.3380      | 1393.6726        | 25 |
| 11 | 1202.6164 | 601.8118        | 1185.5899      | 593.2986         | 1184.6058      | 592.8066         | Q    | 2690.3057 | 1345.6565       | 2673.2791      | 1337.1432        | 2672.2951      | 1336.6512        | 24 |
| 12 | 1317.6434 | 659.3253        | 1300.6168      | 650.8120         | 1299.6328      | 650.3200         | N    | 2561.2631 | 1281.1352       | 2544.2365      | 1272.6219        | 2543.2525      | 1272.1299        | 23 |
| 13 | 1374.6648 | 687.8360        | 1357.6383      | 679.3228         | 1356.6543      | 678.8308         | G    | 2446.2361 | 1223.6217       | 2429.2096      | 1215.1084        | 2428.2256      | 1214.6164        | 22 |
| 14 | 1530.7659 | 765.8866        | 1513.7394      | 757.3733         | 1512.7554      | 756.8813         | R    | 2389.2147 | 1195.1110       | 2372.1881      | 1186.5977        | 2371.2041      | 1186.1057        | 21 |
| 15 | 1587.7874 | 794.3973        | 1570.7608      | 785.8841         | 1569.7768      | 785.3921         | G    | 2233.1135 | 1117.0604       | 2216.0870      | 1108.5471        | 2215.1030      | 1108.0551        | 20 |
| 16 | 1700.8715 | 850.9394        | 1683.8449      | 842.4261         | 1682.8609      | 841.9341         | L    | 2176.0921 | 1088.5497       | 2159.0655      | 1080.0364        | 2158.0815      | 1079.5444        | 19 |
| 17 | 1797.9242 | 899.4657        | 1780.8977      | 890.9525         | 1779.9137      | 890.4605         | P    | 2063.0080 | 1032.0076       | 2045.9815      | 1023.4944        | 2044.9974      | 1023.0024        | 18 |



|    |           |           |           |           |           |           |   |           |          |           |          |           |          |    |
|----|-----------|-----------|-----------|-----------|-----------|-----------|---|-----------|----------|-----------|----------|-----------|----------|----|
| 18 | 1912.9512 | 956.9792  | 1895.9246 | 948.4659  | 1894.9406 | 947.9739  | D | 1965.9553 | 983.4813 | 1948.9287 | 974.9680 | 1947.9447 | 974.4760 | 17 |
| 19 | 2026.0352 | 1013.5213 | 2009.0087 | 1005.0080 | 2008.0247 | 1004.5160 | L | 1850.9283 | 925.9678 | 1833.9018 | 917.4545 | 1832.9177 | 916.9625 | 16 |
| 20 | 2125.1036 | 1063.0555 | 2108.0771 | 1054.5422 | 2107.0931 | 1054.0502 | V | 1737.8442 | 869.4258 | 1720.8177 | 860.9125 | 1719.8337 | 860.4205 | 15 |
| 21 | 2222.1564 | 1111.5818 | 2205.1299 | 1103.0686 | 2204.1458 | 1102.5766 | P | 1638.7758 | 819.8916 | 1621.7493 | 811.3783 | 1620.7653 | 810.8863 | 14 |
| 22 | 2337.1834 | 1169.0953 | 2320.1568 | 1160.5820 | 2319.1728 | 1160.0900 | D | 1541.7231 | 771.3652 | 1524.6965 | 762.8519 | 1523.7125 | 762.3599 | 13 |
| 23 | 2434.2361 | 1217.6217 | 2417.2096 | 1209.1084 | 2416.2255 | 1208.6164 | P | 1426.6961 | 713.8517 | 1409.6696 | 705.3384 | 1408.6856 | 704.8464 | 12 |
| 24 | 2549.2631 | 1275.1352 | 2532.2365 | 1266.6219 | 2531.2525 | 1266.1299 | N | 1329.6434 | 665.3253 | 1312.6168 | 656.8120 | 1311.6328 | 656.3200 | 11 |
| 25 | 2712.3264 | 1356.6668 | 2695.2998 | 1348.1536 | 2694.3158 | 1347.6615 | Y | 1214.6164 | 607.8118 | 1197.5899 | 599.2986 | 1196.6059 | 598.8066 | 10 |
| 26 | 2811.3948 | 1406.2010 | 2794.3683 | 1397.6878 | 2793.3842 | 1397.1958 | V | 1051.5531 | 526.2802 | 1034.5265 | 517.7669 | 1033.5425 | 517.2749 | 9  |
| 27 | 2939.4534 | 1470.2303 | 2922.4268 | 1461.7171 | 2921.4428 | 1461.2250 | Q | 952.4847  | 476.7460 | 935.4581  | 468.2327 | 934.4741  | 467.7407 | 8  |
| 28 | 3010.4905 | 1505.7489 | 2993.4639 | 1497.2356 | 2992.4799 | 1496.7436 | A | 824.4261  | 412.7167 | 807.3995  | 404.2034 | 806.4155  | 403.7114 | 7  |
| 29 | 3097.5225 | 1549.2649 | 3080.4960 | 1540.7516 | 3079.5120 | 1540.2596 | S | 753.3890  | 377.1981 | 736.3624  | 368.6849 | 735.3784  | 368.1928 | 6  |
| 30 | 3198.5702 | 1599.7887 | 3181.5437 | 1591.2755 | 3180.5596 | 1590.7835 | T | 666.3570  | 333.6821 | 649.3304  | 325.1688 | 648.3464  | 324.6768 | 5  |
| 31 | 3361.6335 | 1681.3204 | 3344.6070 | 1672.8071 | 3343.6230 | 1672.3151 | Y | 565.3093  | 283.1583 | 548.2827  | 274.6450 |           |          | 4  |
| 32 | 3460.7019 | 1730.8546 | 3443.6754 | 1722.3413 | 3442.6914 | 1721.8493 | V | 402.2459  | 201.6266 | 385.2194  | 193.1133 |           |          | 3  |
| 33 | 3588.7605 | 1794.8839 | 3571.7340 | 1786.3706 | 3570.7500 | 1785.8786 | Q | 303.1775  | 152.0924 | 286.1510  | 143.5791 |           |          | 2  |
| 34 |           |           |           |           |           |           | R | 175.1190  | 88.0631  | 158.0924  | 79.5498  |           |          | 1  |

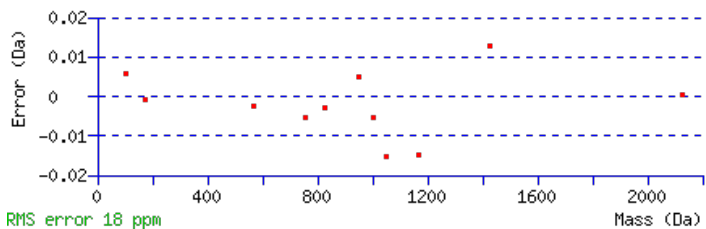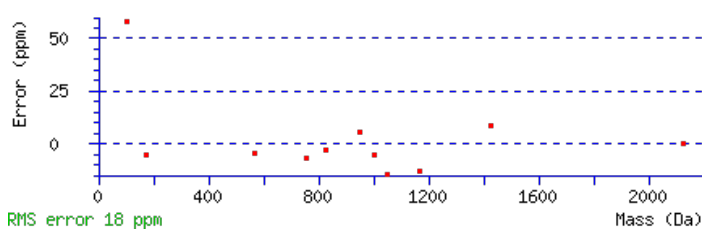

NCBI BLAST search of [LSVGSVYRPNQNGRGLPDLVPDPNYVQASTYVQR](#)

(Parameters: blastp, nr protein database, expect=20000, no filter, PAM30)

Other BLAST [web gateways](#)

All matches to this query

| Score | Mr(calcd) | Delta  | Sequence                                           |
|-------|-----------|--------|----------------------------------------------------|
| 22.6  | 3761.8649 | 1.0115 | <a href="#">LSVGSVYRPNQNGRGLPDLVPDPNYVQASTYVQR</a> |
| 17.4  | 3760.8809 | 1.9955 | <a href="#">LSVGSVYRPNQNGRGLPDLVPDPNYVQASTYVQR</a> |
| 17.4  | 3760.8809 | 1.9955 | <a href="#">LSVGSVYRPNQNGRGLPDLVPDPNYVQASTYVQR</a> |
| 17.4  | 3760.8809 | 1.9955 | <a href="#">LSVGSVYRPNQNGRGLPDLVPDPNYVQASTYVQR</a> |
| 17.0  | 3760.8809 | 1.9955 | <a href="#">LSVGSVYRPNQNGRGLPDLVPDPNYVQASTYVQR</a> |
| 17.0  | 3760.8809 | 1.9955 | <a href="#">LSVGSVYRPNQNGRGLPDLVPDPNYVQASTYVQR</a> |
| 17.0  | 3760.8809 | 1.9955 | <a href="#">LSVGSVYRPNQNGRGLPDLVPDPNYVQASTYVQR</a> |
| 10.4  | 3761.8649 | 1.0115 | <a href="#">LSVGSVYRPNQNGRGLPDLVPDPNYVQASTYVQR</a> |
| 3.2   | 3760.8809 | 1.9955 | <a href="#">LSVGSVYRPNQNGRGLPDLVPDPNYVQASTYVQR</a> |
| 3.2   | 3760.8809 | 1.9955 | <a href="#">LSVGSVYRPNQNGRGLPDLVPDPNYVQASTYVQR</a> |

Mascot: <http://www.matrixscience.com/>

# Mascot Search Results

## Peptide View

MS/MS Fragmentation of **LSVGSVYRPNQNGRGLPDLVPDPNYVQASTYVQR**

Found in **Q08397** in **uni\_human\_nr**, LOXL1\_HUMAN Lysyl oxidase homolog 1 OS=Homo sapiens GN=LOXL1 PE=1 SV=2

Match to Query 16528: 3760.874456 from(941.225890,4+) intensity(246132.0781) rtinseconds(2842) scans(16585) index(12622)

Title: 130801\_HPL\_Human\_Plaque\_BR1\_TR1\_09\_Spectrum033744\_scans\_\_16585\_RTINSECONDS=2842

Data file E:\\RAW\\HumanPlaques\\imgf\\T\\1D\\T130801\_HPL\_Human\_Plaque\_BR1\_TR1\_09.mgf

Click mouse within plot area to zoom in by factor of two about that point

Or,  to  Da

Label all possible matches  Label matches used for scoring

Show Y-axis

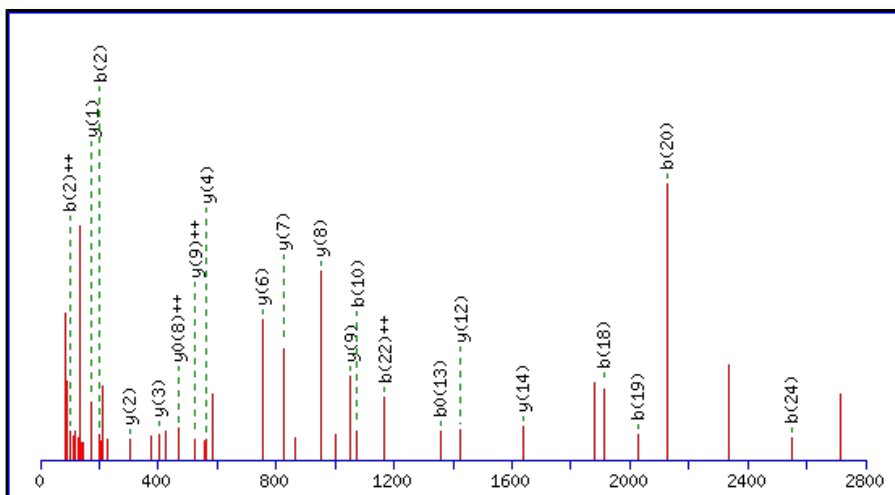

Monoisotopic mass of neutral peptide **Mr(calc): 3760.8809**

Fixed modifications: Carbamidomethyl (C) (apply to specified residues or termini only)

Variable modifications:

N10 : Deamidated (NQ)

N12 : Deamidated (NQ)

Ions Score: 52 Expect: 0.0005

Matches : 21/372 fragment ions using 39 most intense peaks ([help](#))

| #  | b                | b <sup>++</sup> | b <sup>*</sup> | b <sup>***</sup> | b <sup>0</sup>   | b <sup>0++</sup> | Seq. | y         | y <sup>++</sup> | y <sup>*</sup> | y <sup>***</sup> | y <sup>0</sup> | y <sup>0++</sup> | #  |
|----|------------------|-----------------|----------------|------------------|------------------|------------------|------|-----------|-----------------|----------------|------------------|----------------|------------------|----|
| 1  | 114.0913         | 57.5493         |                |                  |                  |                  | L    |           |                 |                |                  |                |                  | 34 |
| 2  | <b>201.1234</b>  | <b>101.0653</b> |                |                  | 183.1128         | 92.0600          | S    | 3648.8041 | 1824.9057       | 3631.7776      | 1816.3924        | 3630.7936      | 1815.9004        | 33 |
| 3  | 300.1918         | 150.5995        |                |                  | 282.1812         | 141.5942         | V    | 3561.7721 | 1781.3897       | 3544.7455      | 1772.8764        | 3543.7615      | 1772.3844        | 32 |
| 4  | 357.2132         | 179.1103        |                |                  | 339.2027         | 170.1050         | G    | 3462.7037 | 1731.8555       | 3445.6771      | 1723.3422        | 3444.6931      | 1722.8502        | 31 |
| 5  | 444.2453         | 222.6263        |                |                  | 426.2347         | 213.6210         | S    | 3405.6822 | 1703.3447       | 3388.6557      | 1694.8315        | 3387.6716      | 1694.3395        | 30 |
| 6  | 543.3137         | 272.1605        |                |                  | 525.3031         | 263.1552         | V    | 3318.6502 | 1659.8287       | 3301.6236      | 1651.3155        | 3300.6396      | 1650.8234        | 29 |
| 7  | 706.3770         | 353.6921        |                |                  | 688.3665         | 344.6869         | Y    | 3219.5818 | 1610.2945       | 3202.5552      | 1601.7812        | 3201.5712      | 1601.2892        | 28 |
| 8  | 862.4781         | 431.7427        | 845.4516       | 423.2294         | 844.4676         | 422.7374         | R    | 3056.5184 | 1528.7629       | 3039.4919      | 1520.2496        | 3038.5079      | 1519.7576        | 27 |
| 9  | 959.5309         | 480.2691        | 942.5043       | 471.7558         | 941.5203         | 471.2638         | P    | 2900.4173 | 1450.7123       | 2883.3908      | 1442.1990        | 2882.4068      | 1441.7070        | 26 |
| 10 | <b>1074.5578</b> | 537.7826        | 1057.5313      | 529.2693         | 1056.5473        | 528.7773         | N    | 2803.3646 | 1402.1859       | 2786.3380      | 1393.6726        | 2785.3540      | 1393.1806        | 25 |
| 11 | 1202.6164        | 601.8118        | 1185.5899      | 593.2986         | 1184.6058        | 592.8066         | Q    | 2688.3376 | 1344.6724       | 2671.3111      | 1336.1592        | 2670.3271      | 1335.6672        | 24 |
| 12 | 1317.6434        | 659.3253        | 1300.6168      | 650.8120         | 1299.6328        | 650.3200         | N    | 2560.2790 | 1280.6432       | 2543.2525      | 1272.1299        | 2542.2685      | 1271.6379        | 23 |
| 13 | 1374.6648        | 687.8360        | 1357.6383      | 679.3228         | <b>1356.6543</b> | 678.8308         | G    | 2445.2521 | 1223.1297       | 2428.2256      | 1214.6164        | 2427.2415      | 1214.1244        | 22 |
| 14 | 1530.7659        | 765.8866        | 1513.7394      | 757.3733         | 1512.7554        | 756.8813         | R    | 2388.2306 | 1194.6190       | 2371.2041      | 1186.1057        | 2370.2201      | 1185.6137        | 21 |
| 15 | 1587.7874        | 794.3973        | 1570.7608      | 785.8841         | 1569.7768        | 785.3921         | G    | 2232.1295 | 1116.5684       | 2215.1030      | 1108.0551        | 2214.1190      | 1107.5631        | 20 |
| 16 | 1700.8715        | 850.9394        | 1683.8449      | 842.4261         | 1682.8609        | 841.9341         | L    | 2175.1081 | 1088.0577       | 2158.0815      | 1079.5444        | 2157.0975      | 1079.0524        | 19 |
| 17 | 1797.9242        | 899.4657        | 1780.8977      | 890.9525         | 1779.9137        | 890.4605         | P    | 2062.0240 | 1031.5156       | 2044.9974      | 1023.0024        | 2044.0134      | 1022.5104        | 18 |

|    |                  |                  |           |           |           |           |   |                  |                 |           |          |           |                 |    |
|----|------------------|------------------|-----------|-----------|-----------|-----------|---|------------------|-----------------|-----------|----------|-----------|-----------------|----|
| 18 | <b>1912.9512</b> | 956.9792         | 1895.9246 | 948.4659  | 1894.9406 | 947.9739  | D | 1964.9712        | 982.9893        | 1947.9447 | 974.4760 | 1946.9607 | 973.9840        | 17 |
| 19 | <b>2026.0352</b> | 1013.5213        | 2009.0087 | 1005.0080 | 2008.0247 | 1004.5160 | L | 1849.9443        | 925.4758        | 1832.9177 | 916.9625 | 1831.9337 | 916.4705        | 16 |
| 20 | <b>2125.1036</b> | 1063.0555        | 2108.0771 | 1054.5422 | 2107.0931 | 1054.0502 | V | 1736.8602        | 868.9338        | 1719.8337 | 860.4205 | 1718.8497 | 859.9285        | 15 |
| 21 | 2222.1564        | 1111.5818        | 2205.1299 | 1103.0686 | 2204.1458 | 1102.5766 | P | <b>1637.7918</b> | 819.3995        | 1620.7653 | 810.8863 | 1619.7812 | 810.3943        | 14 |
| 22 | 2337.1834        | <b>1169.0953</b> | 2320.1568 | 1160.5820 | 2319.1728 | 1160.0900 | D | 1540.7390        | 770.8732        | 1523.7125 | 762.3599 | 1522.7285 | 761.8679        | 13 |
| 23 | 2434.2361        | 1217.6217        | 2417.2096 | 1209.1084 | 2416.2255 | 1208.6164 | P | <b>1425.7121</b> | 713.3597        | 1408.6856 | 704.8464 | 1407.7015 | 704.3544        | 12 |
| 24 | <b>2548.2790</b> | 1274.6432        | 2531.2525 | 1266.1299 | 2530.2685 | 1265.6379 | N | 1328.6593        | 664.8333        | 1311.6328 | 656.3200 | 1310.6488 | 655.8280        | 11 |
| 25 | 2711.3424        | 1356.1748        | 2694.3158 | 1347.6615 | 2693.3318 | 1347.1695 | Y | 1214.6164        | 607.8118        | 1197.5899 | 599.2986 | 1196.6059 | 598.8066        | 10 |
| 26 | 2810.4108        | 1405.7090        | 2793.3842 | 1397.1958 | 2792.4002 | 1396.7037 | V | <b>1051.5531</b> | <b>526.2802</b> | 1034.5265 | 517.7669 | 1033.5425 | 517.2749        | 9  |
| 27 | 2938.4694        | 1469.7383        | 2921.4428 | 1461.2250 | 2920.4588 | 1460.7330 | Q | <b>952.4847</b>  | 476.7460        | 935.4581  | 468.2327 | 934.4741  | <b>467.7407</b> | 8  |
| 28 | 3009.5065        | 1505.2569        | 2992.4799 | 1496.7436 | 2991.4959 | 1496.2516 | A | <b>824.4261</b>  | 412.7167        | 807.3995  | 404.2034 | 806.4155  | 403.7114        | 7  |
| 29 | 3096.5385        | 1548.7729        | 3079.5120 | 1540.2596 | 3078.5279 | 1539.7676 | S | <b>753.3890</b>  | 377.1981        | 736.3624  | 368.6849 | 735.3784  | 368.1928        | 6  |
| 30 | 3197.5862        | 1599.2967        | 3180.5596 | 1590.7835 | 3179.5756 | 1590.2914 | T | 666.3570         | 333.6821        | 649.3304  | 325.1688 | 648.3464  | 324.6768        | 5  |
| 31 | 3360.6495        | 1680.8284        | 3343.6230 | 1672.3151 | 3342.6389 | 1671.8231 | Y | <b>565.3093</b>  | 283.1583        | 548.2827  | 274.6450 |           |                 | 4  |
| 32 | 3459.7179        | 1730.3626        | 3442.6914 | 1721.8493 | 3441.7074 | 1721.3573 | V | <b>402.2459</b>  | 201.6266        | 385.2194  | 193.1133 |           |                 | 3  |
| 33 | 3587.7765        | 1794.3919        | 3570.7500 | 1785.8786 | 3569.7659 | 1785.3866 | Q | <b>303.1775</b>  | 152.0924        | 286.1510  | 143.5791 |           |                 | 2  |
| 34 |                  |                  |           |           |           |           | R | <b>175.1190</b>  | 88.0631         | 158.0924  | 79.5498  |           |                 | 1  |

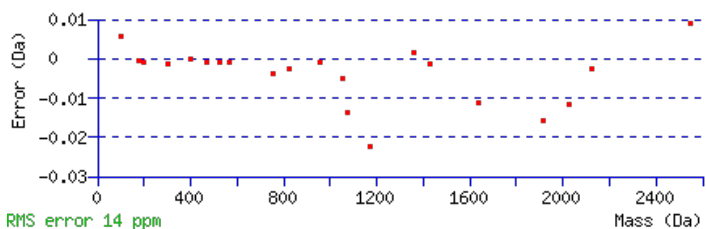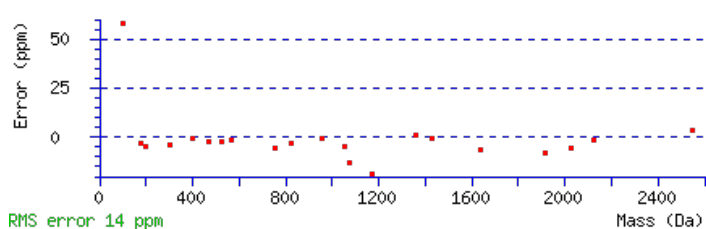

NCBI BLAST search of [LSVGSVYRPNQNGRGLPDLVPDPNYVQASTYVQR](#)  
 (Parameters: blastp, nr protein database, expect=20000, no filter, PAM30)  
 Other BLAST [web gateways](#)

All matches to this query

| Score | Mr(calc)  | Delta   | Sequence                                           | Site Analysis              |
|-------|-----------|---------|----------------------------------------------------|----------------------------|
| 51.8  | 3760.8809 | -0.0064 | <a href="#">LSVGSVYRPNQNGRGLPDLVPDPNYVQASTYVQR</a> | Deamidated N10, N12 45.36% |
| 51.8  | 3760.8809 | -0.0064 | <a href="#">LSVGSVYRPNQNGRGLPDLVPDPNYVQASTYVQR</a> | Deamidated N10, Q11 45.36% |
| 44.8  | 3760.8809 | -0.0064 | <a href="#">LSVGSVYRPNQNGRGLPDLVPDPNYVQASTYVQR</a> | Deamidated Q11, N12 9.16%  |
| 21.7  | 3760.8809 | -0.0064 | <a href="#">LSVGSVYRPNQNGRGLPDLVPDPNYVQASTYVQR</a> | Deamidated N10, N24 0.04%  |
| 20.4  | 3760.8809 | -0.0064 | <a href="#">LSVGSVYRPNQNGRGLPDLVPDPNYVQASTYVQR</a> | Deamidated N12, N24 0.03%  |
| 20.4  | 3760.8809 | -0.0064 | <a href="#">LSVGSVYRPNQNGRGLPDLVPDPNYVQASTYVQR</a> | Deamidated Q11, N24 0.03%  |
| 3.8   | 3760.8809 | -0.0064 | <a href="#">LSVGSVYRPNQNGRGLPDLVPDPNYVQASTYVQR</a> | Deamidated N10, Q27 0.00%  |
| 3.2   | 3760.8809 | -0.0064 | <a href="#">LSVGSVYRPNQNGRGLPDLVPDPNYVQASTYVQR</a> | Deamidated N12, Q27 0.00%  |
| 3.2   | 3760.8809 | -0.0064 | <a href="#">LSVGSVYRPNQNGRGLPDLVPDPNYVQASTYVQR</a> | Deamidated Q11, Q27 0.00%  |
| 2.7   | 3760.8809 | -0.0064 | <a href="#">LSVGSVYRPNQNGRGLPDLVPDPNYVQASTYVQR</a> | Deamidated N24, Q27 0.00%  |

Mascot: <http://www.matrixscience.com/>

# Mascot Search Results

## Peptide View

MS/MS Fragmentation of **LSVGSVYRPNQNGRGLPDLVPDPNYVQASTYVQR**

Found in **Q08397** in **uni\_human\_nr**, LOXL1\_HUMAN Lysyl oxidase homolog 1 OS=Homo sapiens GN=LOXL1 PE=1 SV=2

Match to Query 20036: 3760.897656 from(941.231690,4+) intensity(870937.9375) rtinseconds(2742) scans(17517) index(14144)

Title: 130806\_HPL\_Human\_Plaque\_BR1\_TR2\_04\_Spectrum037558\_scans\_\_17517\_RTINSECONDS=2742

Data file E:\\RAW\\HumanPlaques\\imgf\\T\\1D\\T130806\_HPL\_Human\_Plaque\_BR1\_TR2\_04.mgf

Click mouse within plot area to zoom in by factor of two about that point

Or,  to  Da

Label all possible matches  Label matches used for scoring

Show Y-axis

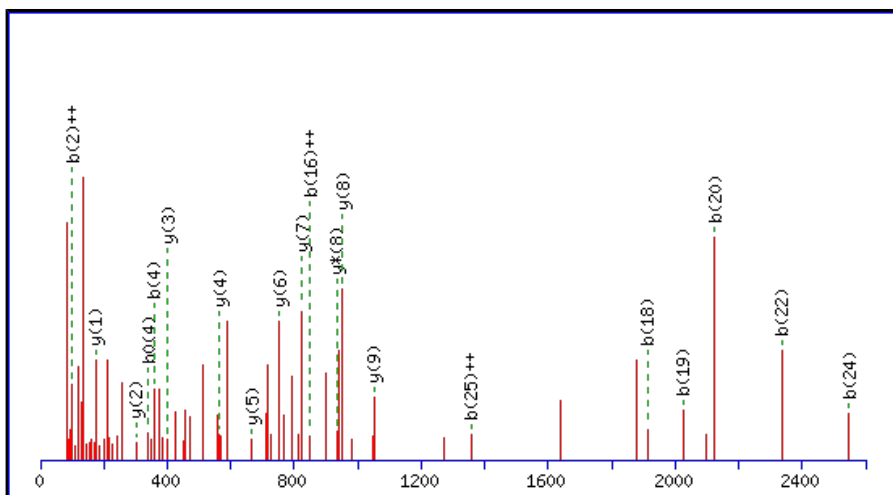

Monoisotopic mass of neutral peptide **Mr(calc): 3760.8809**

Fixed modifications: Carbamidomethyl (C) (apply to specified residues or termini only)

Variable modifications:

N12 : Deamidated (NQ)

N24 : Deamidated (NQ)

Ions Score: 32 Expect: 0.044

Matches : 20/372 fragment ions using 53 most intense peaks ([help](#))

| #  | b               | b <sup>++</sup> | b <sup>*</sup> | b <sup>***</sup> | b <sup>0</sup>  | b <sup>0++</sup> | Seq. | y         | y <sup>++</sup> | y <sup>*</sup> | y <sup>***</sup> | y <sup>0</sup> | y <sup>0++</sup> | #  |
|----|-----------------|-----------------|----------------|------------------|-----------------|------------------|------|-----------|-----------------|----------------|------------------|----------------|------------------|----|
| 1  | 114.0913        | 57.5493         |                |                  |                 |                  | L    |           |                 |                |                  |                |                  | 34 |
| 2  | 201.1234        | <b>101.0653</b> |                |                  | 183.1128        | 92.0600          | S    | 3648.8041 | 1824.9057       | 3631.7776      | 1816.3924        | 3630.7936      | 1815.9004        | 33 |
| 3  | 300.1918        | 150.5995        |                |                  | 282.1812        | 141.5942         | V    | 3561.7721 | 1781.3897       | 3544.7455      | 1772.8764        | 3543.7615      | 1772.3844        | 32 |
| 4  | <b>357.2132</b> | 179.1103        |                |                  | <b>339.2027</b> | 170.1050         | G    | 3462.7037 | 1731.8555       | 3445.6771      | 1723.3422        | 3444.6931      | 1722.8502        | 31 |
| 5  | 444.2453        | 222.6263        |                |                  | 426.2347        | 213.6210         | S    | 3405.6822 | 1703.3447       | 3388.6557      | 1694.8315        | 3387.6716      | 1694.3395        | 30 |
| 6  | 543.3137        | 272.1605        |                |                  | 525.3031        | 263.1552         | V    | 3318.6502 | 1659.8287       | 3301.6236      | 1651.3155        | 3300.6396      | 1650.8234        | 29 |
| 7  | 706.3770        | 353.6921        |                |                  | 688.3665        | 344.6869         | Y    | 3219.5818 | 1610.2945       | 3202.5552      | 1601.7812        | 3201.5712      | 1601.2892        | 28 |
| 8  | 862.4781        | 431.7427        | 845.4516       | 423.2294         | 844.4676        | 422.7374         | R    | 3056.5184 | 1528.7629       | 3039.4919      | 1520.2496        | 3038.5079      | 1519.7576        | 27 |
| 9  | 959.5309        | 480.2691        | 942.5043       | 471.7558         | 941.5203        | 471.2638         | P    | 2900.4173 | 1450.7123       | 2883.3908      | 1442.1990        | 2882.4068      | 1441.7070        | 26 |
| 10 | 1073.5738       | 537.2905        | 1056.5473      | 528.7773         | 1055.5633       | 528.2853         | N    | 2803.3646 | 1402.1859       | 2786.3380      | 1393.6726        | 2785.3540      | 1393.1806        | 25 |
| 11 | 1201.6324       | 601.3198        | 1184.6058      | 592.8066         | 1183.6218       | 592.3146         | Q    | 2689.3216 | 1345.1645       | 2672.2951      | 1336.6512        | 2671.3111      | 1336.1592        | 24 |
| 12 | 1316.6593       | 658.8333        | 1299.6328      | 650.3200         | 1298.6488       | 649.8280         | N    | 2561.2631 | 1281.1352       | 2544.2365      | 1272.6219        | 2543.2525      | 1272.1299        | 23 |
| 13 | 1373.6808       | 687.3440        | 1356.6543      | 678.8308         | 1355.6702       | 678.3388         | G    | 2446.2361 | 1223.6217       | 2429.2096      | 1215.1084        | 2428.2256      | 1214.6164        | 22 |
| 14 | 1529.7819       | 765.3946        | 1512.7554      | 756.8813         | 1511.7714       | 756.3893         | R    | 2389.2147 | 1195.1110       | 2372.1881      | 1186.5977        | 2371.2041      | 1186.1057        | 21 |
| 15 | 1586.8034       | 793.9053        | 1569.7768      | 785.3921         | 1568.7928       | 784.9000         | G    | 2233.1135 | 1117.0604       | 2216.0870      | 1108.5471        | 2215.1030      | 1108.0551        | 20 |
| 16 | 1699.8874       | <b>850.4474</b> | 1682.8609      | 841.9341         | 1681.8769       | 841.4421         | L    | 2176.0921 | 1088.5497       | 2159.0655      | 1080.0364        | 2158.0815      | 1079.5444        | 19 |
| 17 | 1796.9402       | 898.9737        | 1779.9137      | 890.4605         | 1778.9296       | 889.9685         | P    | 2063.0080 | 1032.0076       | 2045.9815      | 1023.4944        | 2044.9974      | 1023.0024        | 18 |

|    |                  |           |                  |           |           |           |           |           |                  |           |                 |           |           |           |           |
|----|------------------|-----------|------------------|-----------|-----------|-----------|-----------|-----------|------------------|-----------|-----------------|-----------|-----------|-----------|-----------|
| 18 | <b>1911.9671</b> | 956.4872  | 1894.9406        | 947.9739  | 1893.9566 | 947.4819  | <b>D</b>  | 1965.9552 | 983.4813         | 1948.9287 | 974.9680        | 1947.9447 | 974.4760  | <b>17</b> |           |
| 19 | <b>2025.0512</b> | 1013.0292 | 2008.0247        | 1004.5160 | 2007.0406 | 1004.0240 | <b>L</b>  | 1850.9283 | 925.9678         | 1833.9018 | 917.4545        | 1832.9177 | 916.9625  | <b>16</b> |           |
| 20 | <b>2124.1196</b> | 1062.5635 | 2107.0931        | 1054.0502 | 2106.1091 | 1053.5582 | <b>V</b>  | 1737.8442 | 869.4258         | 1720.8177 | 860.9125        | 1719.8337 | 860.4205  | <b>15</b> |           |
| 21 |                  | 2221.1724 | 1111.0898        | 2204.1458 | 1102.5766 | 2203.1618 | 1102.0846 | <b>P</b>  | 1638.7758        | 819.8916  | 1621.7493       | 811.3783  | 1620.7653 | 810.8863  | <b>14</b> |
| 22 | <b>2336.1993</b> | 1168.6033 | 2319.1728        | 1160.0900 | 2318.1888 | 1159.5980 | <b>D</b>  | 1541.7231 | 771.3652         | 1524.6965 | 762.8519        | 1523.7125 | 762.3599  | <b>13</b> |           |
| 23 |                  | 2433.2521 | 1217.1297        | 2416.2255 | 1208.6164 | 2415.2415 | 1208.1244 | <b>P</b>  | 1426.6961        | 713.8517  | 1409.6696       | 705.3384  | 1408.6856 | 704.8464  | <b>12</b> |
| 24 | <b>2548.2790</b> | 1274.6432 | 2531.2525        | 1266.1299 | 2530.2685 | 1265.6379 | <b>N</b>  | 1329.6434 | 665.3253         | 1312.6168 | 656.8120        | 1311.6328 | 656.3200  | <b>11</b> |           |
| 25 |                  | 2711.3424 | <b>1356.1748</b> | 2694.3158 | 1347.6615 | 2693.3318 | 1347.1695 | <b>Y</b>  | 1214.6164        | 607.8118  | 1197.5899       | 599.2986  | 1196.6059 | 598.8066  | <b>10</b> |
| 26 |                  | 2810.4108 | 1405.7090        | 2793.3842 | 1397.1958 | 2792.4002 | 1396.7037 | <b>V</b>  | <b>1051.5531</b> | 526.2802  | 1034.5265       | 517.7669  | 1033.5425 | 517.2749  | <b>9</b>  |
| 27 |                  | 2938.4694 | 1469.7383        | 2921.4428 | 1461.2250 | 2920.4588 | 1460.7330 | <b>Q</b>  | <b>952.4847</b>  | 476.7460  | <b>935.4581</b> | 468.2327  | 934.4741  | 467.7407  | <b>8</b>  |
| 28 |                  | 3009.5065 | 1505.2569        | 2992.4799 | 1496.7436 | 2991.4959 | 1496.2516 | <b>A</b>  | <b>824.4261</b>  | 412.7167  | 807.3995        | 404.2034  | 806.4155  | 403.7114  | <b>7</b>  |
| 29 |                  | 3096.5385 | 1548.7729        | 3079.5120 | 1540.2596 | 3078.5279 | 1539.7676 | <b>S</b>  | <b>753.3890</b>  | 377.1981  | 736.3624        | 368.6849  | 735.3784  | 368.1928  | <b>6</b>  |
| 30 |                  | 3197.5862 | 1599.2967        | 3180.5596 | 1590.7835 | 3179.5756 | 1590.2914 | <b>T</b>  | <b>666.3570</b>  | 333.6821  | 649.3304        | 325.1688  | 648.3464  | 324.6768  | <b>5</b>  |
| 31 |                  | 3360.6495 | 1680.8284        | 3343.6230 | 1672.3151 | 3342.6389 | 1671.8231 | <b>Y</b>  | <b>565.3093</b>  | 283.1583  | 548.2827        | 274.6450  |           |           | <b>4</b>  |
| 32 |                  | 3459.7179 | 1730.3626        | 3442.6914 | 1721.8493 | 3441.7074 | 1721.3573 | <b>V</b>  | <b>402.2459</b>  | 201.6266  | 385.2194        | 193.1133  |           |           | <b>3</b>  |
| 33 |                  | 3587.7765 | 1794.3919        | 3570.7500 | 1785.8786 | 3569.7659 | 1785.3866 | <b>Q</b>  | <b>303.1775</b>  | 152.0924  | 286.1510        | 143.5791  |           |           | <b>2</b>  |
| 34 |                  |           |                  |           |           |           |           | <b>R</b>  | <b>175.1190</b>  | 88.0631   | 158.0924        | 79.5498   |           |           | <b>1</b>  |

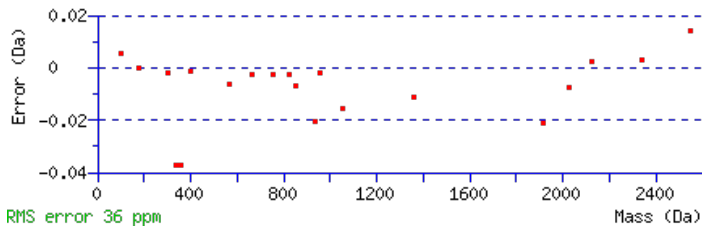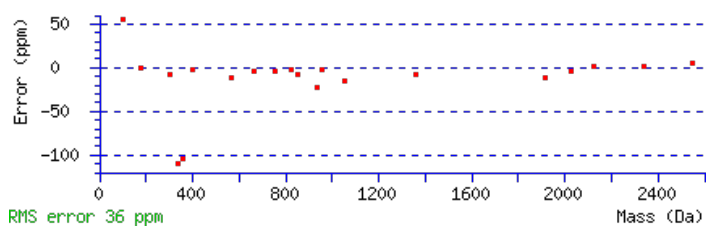

NCBI BLAST search of [LSVGSVYRPNQNGRGLPDLVPDPNYVQASTYVQR](#)

(Parameters: blastp, nr protein database, expect=20000, no filter, PAM30)

Other BLAST [web gateways](#)

All matches to this query

| Score | Mr(calc)  | Delta  | Sequence                                           | Site Analysis              |
|-------|-----------|--------|----------------------------------------------------|----------------------------|
| 31.9  | 3760.8809 | 0.0168 | <a href="#">LSVGSVYRPNQNGRGLPDLVPDPNYVQASTYVQR</a> | Deamidated N12, N24 26.84% |
| 31.9  | 3760.8809 | 0.0168 | <a href="#">LSVGSVYRPNQNGRGLPDLVPDPNYVQASTYVQR</a> | Deamidated Q11, N24 26.84% |
| 31.9  | 3760.8809 | 0.0168 | <a href="#">LSVGSVYRPNQNGRGLPDLVPDPNYVQASTYVQR</a> | Deamidated N10, N24 26.84% |
| 31.6  | 3759.8969 | 1.0008 | <a href="#">LSVGSVYRPNQNGRGLPDLVPDPNYVQASTYVQR</a> |                            |
| 31.6  | 3759.8969 | 1.0008 | <a href="#">LSVGSVYRPNQNGRGLPDLVPDPNYVQASTYVQR</a> |                            |
| 31.6  | 3759.8969 | 1.0008 | <a href="#">LSVGSVYRPNQNGRGLPDLVPDPNYVQASTYVQR</a> |                            |
| 24.1  | 3760.8809 | 0.0168 | <a href="#">LSVGSVYRPNQNGRGLPDLVPDPNYVQASTYVQR</a> | Deamidated Q11, N12 4.39%  |
| 24.1  | 3760.8809 | 0.0168 | <a href="#">LSVGSVYRPNQNGRGLPDLVPDPNYVQASTYVQR</a> | Deamidated N10, N12 4.39%  |
| 24.1  | 3760.8809 | 0.0168 | <a href="#">LSVGSVYRPNQNGRGLPDLVPDPNYVQASTYVQR</a> | Deamidated N10, Q11 4.39%  |
| 17.1  | 3759.8969 | 1.0008 | <a href="#">LSVGSVYRPNQNGRGLPDLVPDPNYVQASTYVQR</a> |                            |

Mascot: <http://www.matrixscience.com/>

# Mascot Search Results

## Peptide View

MS/MS Fragmentation of **LSVGSVYRPNQNGRGLPDLVPDPNYVQASTYVQR**

Found in **Q08397** in **uni\_human\_nr**, LOXL1\_HUMAN Lysyl oxidase homolog 1 OS=Homo sapiens GN=LOXL1 PE=1 SV=2

Match to Query 19403: 3762.893016 from(941.730530,4+) intensity(695549.1250) rtinseconds(2739) scans(17049) index(13721)

Title: 130801\_HPL\_Human\_Plaque\_BR2\_TR1\_04\_Spectrum036295\_scans\_\_17049\_RTINSECONDS=2739

Data file E:\\RAW\\HumanPlaques\\mgf\\T\\1D\\T130801\_HPL\_Human\_Plaque\_BR2\_TR1\_04.mgf

Click mouse within plot area to zoom in by factor of two about that point

Or, to Da  
 Label all possible matches Label matches used for scoring  
 Show Y-axis

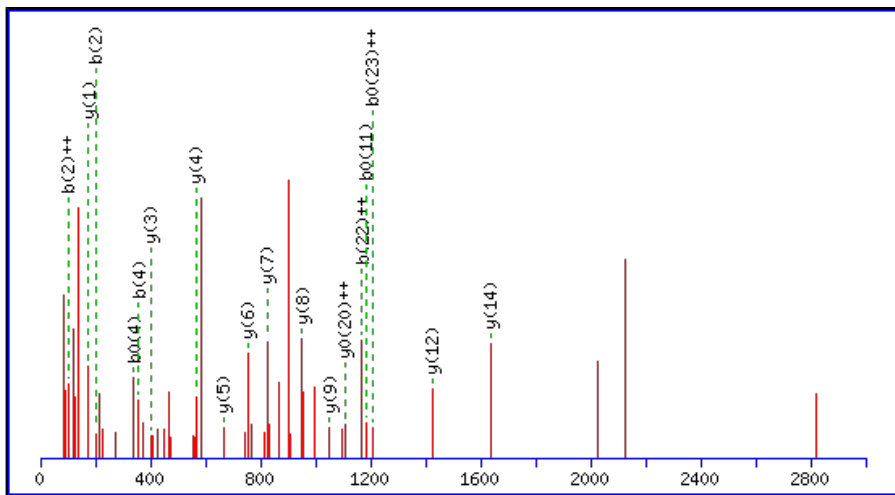

Monoisotopic mass of neutral peptide **Mr(calc): 3760.8809**

Fixed modifications: Carbamidomethyl (C) (apply to specified residues or termini only)

Variable modifications:

Q11 : Deamidated (NQ)

N12 : Deamidated (NQ)

Ions Score: 28 Expect: 0.12

Matches : 18/372 fragment ions using 50 most intense peaks ([help](#))

| #  | b               | b <sup>++</sup> | b <sup>*</sup> | b <sup>***</sup> | b <sup>0</sup>   | b <sup>0++</sup> | Seq. | y         | y <sup>++</sup> | y <sup>*</sup> | y <sup>***</sup> | y <sup>0</sup> | y <sup>0++</sup> | #  |
|----|-----------------|-----------------|----------------|------------------|------------------|------------------|------|-----------|-----------------|----------------|------------------|----------------|------------------|----|
| 1  | 114.0913        | 57.5493         |                |                  |                  |                  | L    |           |                 |                |                  |                |                  | 34 |
| 2  | <b>201.1234</b> | <b>101.0653</b> |                |                  | 183.1128         | 92.0600          | S    | 3648.8041 | 1824.9057       | 3631.7776      | 1816.3924        | 3630.7936      | 1815.9004        | 33 |
| 3  | 300.1918        | 150.5995        |                |                  | 282.1812         | 141.5942         | V    | 3561.7721 | 1781.3897       | 3544.7455      | 1772.8764        | 3543.7615      | 1772.3844        | 32 |
| 4  | <b>357.2132</b> | 179.1103        |                |                  | <b>339.2027</b>  | 170.1050         | G    | 3462.7037 | 1731.8555       | 3445.6771      | 1723.3422        | 3444.6931      | 1722.8502        | 31 |
| 5  | 444.2453        | 222.6263        |                |                  | 426.2347         | 213.6210         | S    | 3405.6822 | 1703.3447       | 3388.6557      | 1694.8315        | 3387.6716      | 1694.3395        | 30 |
| 6  | 543.3137        | 272.1605        |                |                  | 525.3031         | 263.1552         | V    | 3318.6502 | 1659.8287       | 3301.6236      | 1651.3155        | 3300.6396      | 1650.8234        | 29 |
| 7  | 706.3770        | 353.6921        |                |                  | 688.3665         | 344.6869         | Y    | 3219.5818 | 1610.2945       | 3202.5552      | 1601.7812        | 3201.5712      | 1601.2892        | 28 |
| 8  | 862.4781        | 431.7427        | 845.4516       | 423.2294         | 844.4676         | 422.7374         | R    | 3056.5184 | 1528.7629       | 3039.4919      | 1520.2496        | 3038.5079      | 1519.7576        | 27 |
| 9  | 959.5309        | 480.2691        | 942.5043       | 471.7558         | 941.5203         | 471.2638         | P    | 2900.4173 | 1450.7123       | 2883.3908      | 1442.1990        | 2882.4068      | 1441.7070        | 26 |
| 10 | 1073.5738       | 537.2905        | 1056.5473      | 528.7773         | 1055.5633        | 528.2853         | N    | 2803.3646 | 1402.1859       | 2786.3380      | 1393.6726        | 2785.3540      | 1393.1806        | 25 |
| 11 | 1202.6164       | 601.8118        | 1185.5899      | 593.2986         | <b>1184.6058</b> | 592.8066         | Q    | 2689.3216 | 1345.1645       | 2672.2951      | 1336.6512        | 2671.3111      | 1336.1592        | 24 |
| 12 | 1317.6434       | 659.3253        | 1300.6168      | 650.8120         | 1299.6328        | 650.3200         | N    | 2560.2790 | 1280.6432       | 2543.2525      | 1272.1299        | 2542.2685      | 1271.6379        | 23 |
| 13 | 1374.6648       | 687.8360        | 1357.6383      | 679.3228         | 1356.6543        | 678.8308         | G    | 2445.2521 | 1223.1297       | 2428.2256      | 1214.6164        | 2427.2415      | 1214.1244        | 22 |
| 14 | 1530.7659       | 765.8866        | 1513.7394      | 757.3733         | 1512.7554        | 756.8813         | R    | 2388.2306 | 1194.6190       | 2371.2041      | 1186.1057        | 2370.2201      | 1185.6137        | 21 |
| 15 | 1587.7874       | 794.3973        | 1570.7608      | 785.8841         | 1569.7768        | 785.3921         | G    | 2232.1295 | 1116.5684       | 2215.1030      | 1108.0551        | 2214.1190      | <b>1107.5631</b> | 20 |
| 16 | 1700.8715       | 850.9394        | 1683.8449      | 842.4261         | 1682.8609        | 841.9341         | L    | 2175.1081 | 1088.0577       | 2158.0815      | 1079.5444        | 2157.0975      | 1079.0524        | 19 |
| 17 | 1797.9242       | 899.4657        | 1780.8977      | 890.9525         | 1779.9137        | 890.4605         | P    | 2062.0240 | 1031.5156       | 2044.9974      | 1023.0024        | 2044.0134      | 1022.5104        | 18 |

|    |           |                  |           |           |           |                  |   |                  |          |           |          |           |          |    |
|----|-----------|------------------|-----------|-----------|-----------|------------------|---|------------------|----------|-----------|----------|-----------|----------|----|
| 18 | 1912.9512 | 956.9792         | 1895.9246 | 948.4659  | 1894.9406 | 947.9739         | D | 1964.9712        | 982.9893 | 1947.9447 | 974.4760 | 1946.9607 | 973.9840 | 17 |
| 19 | 2026.0352 | 1013.5213        | 2009.0087 | 1005.0080 | 2008.0247 | 1004.5160        | L | 1849.9443        | 925.4758 | 1832.9177 | 916.9625 | 1831.9337 | 916.4705 | 16 |
| 20 | 2125.1036 | 1063.0555        | 2108.0771 | 1054.5422 | 2107.0931 | 1054.0502        | V | 1736.8602        | 868.9338 | 1719.8337 | 860.4205 | 1718.8497 | 859.9285 | 15 |
| 21 | 2222.1564 | 1111.5818        | 2205.1299 | 1103.0686 | 2204.1458 | 1102.5766        | P | <b>1637.7918</b> | 819.3995 | 1620.7653 | 810.8863 | 1619.7812 | 810.3943 | 14 |
| 22 | 2337.1834 | <b>1169.0953</b> | 2320.1568 | 1160.5820 | 2319.1728 | 1160.0900        | D | 1540.7390        | 770.8732 | 1523.7125 | 762.3599 | 1522.7285 | 761.8679 | 13 |
| 23 | 2434.2361 | 1217.6217        | 2417.2096 | 1209.1084 | 2416.2255 | <b>1208.6164</b> | P | <b>1425.7121</b> | 713.3597 | 1408.6856 | 704.8464 | 1407.7015 | 704.3544 | 12 |
| 24 | 2548.2790 | 1274.6432        | 2531.2525 | 1266.1299 | 2530.2685 | 1265.6379        | N | 1328.6593        | 664.8333 | 1311.6328 | 656.3200 | 1310.6488 | 655.8280 | 11 |
| 25 | 2711.3424 | 1356.1748        | 2694.3158 | 1347.6615 | 2693.3318 | 1347.1695        | Y | 1214.6164        | 607.8118 | 1197.5899 | 599.2986 | 1196.6059 | 598.8066 | 10 |
| 26 | 2810.4108 | 1405.7090        | 2793.3842 | 1397.1958 | 2792.4002 | 1396.7037        | V | <b>1051.5531</b> | 526.2802 | 1034.5265 | 517.7669 | 1033.5425 | 517.2749 | 9  |
| 27 | 2938.4694 | 1469.7383        | 2921.4428 | 1461.2250 | 2920.4588 | 1460.7330        | Q | <b>952.4847</b>  | 476.7460 | 935.4581  | 468.2327 | 934.4741  | 467.7407 | 8  |
| 28 | 3009.5065 | 1505.2569        | 2992.4799 | 1496.7436 | 2991.4959 | 1496.2516        | A | <b>824.4261</b>  | 412.7167 | 807.3995  | 404.2034 | 806.4155  | 403.7114 | 7  |
| 29 | 3096.5385 | 1548.7729        | 3079.5120 | 1540.2596 | 3078.5279 | 1539.7676        | S | <b>753.3890</b>  | 377.1981 | 736.3624  | 368.6849 | 735.3784  | 368.1928 | 6  |
| 30 | 3197.5862 | 1599.2967        | 3180.5596 | 1590.7835 | 3179.5756 | 1590.2914        | T | <b>666.3570</b>  | 333.6821 | 649.3304  | 325.1688 | 648.3464  | 324.6768 | 5  |
| 31 | 3360.6495 | 1680.8284        | 3343.6230 | 1672.3151 | 3342.6389 | 1671.8231        | Y | <b>565.3093</b>  | 283.1583 | 548.2827  | 274.6450 |           |          | 4  |
| 32 | 3459.7179 | 1730.3626        | 3442.6914 | 1721.8493 | 3441.7074 | 1721.3573        | V | <b>402.2459</b>  | 201.6266 | 385.2194  | 193.1133 |           |          | 3  |
| 33 | 3587.7765 | 1794.3919        | 3570.7500 | 1785.8786 | 3569.7659 | 1785.3866        | Q | 303.1775         | 152.0924 | 286.1510  | 143.5791 |           |          | 2  |
| 34 |           |                  |           |           |           |                  | R | <b>175.1190</b>  | 88.0631  | 158.0924  | 79.5498  |           |          | 1  |

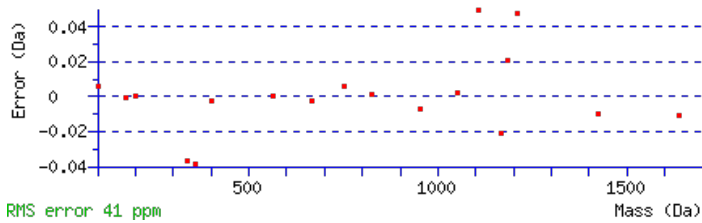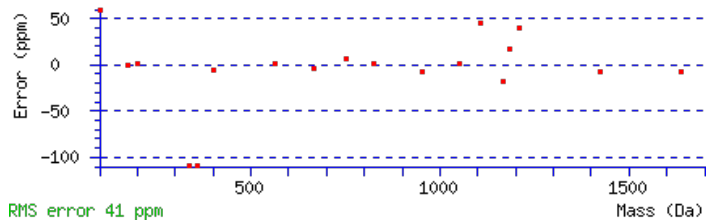

NCBI BLAST search of [LSVGSVYRPNQNGRGLPDLVPDPNYVQASTYVQR](#)  
 (Parameters: blastp, nr protein database, expect=20000, no filter, PAM30)  
 Other BLAST [web gateways](#)

All matches to this query

| Score | Mr(calc)  | Delta  | Sequence                                           |
|-------|-----------|--------|----------------------------------------------------|
| 27.7  | 3760.8809 | 2.0121 | <a href="#">LSVGSVYRPNQNGRGLPDLVPDPNYVQASTYVQR</a> |
| 27.7  | 3760.8809 | 2.0121 | <a href="#">LSVGSVYRPNQNGRGLPDLVPDPNYVQASTYVQR</a> |
| 26.4  | 3760.8809 | 2.0121 | <a href="#">LSVGSVYRPNQNGRGLPDLVPDPNYVQASTYVQR</a> |
| 20.0  | 3760.8809 | 2.0121 | <a href="#">LSVGSVYRPNQNGRGLPDLVPDPNYVQASTYVQR</a> |
| 20.0  | 3760.8809 | 2.0121 | <a href="#">LSVGSVYRPNQNGRGLPDLVPDPNYVQASTYVQR</a> |
| 20.0  | 3760.8809 | 2.0121 | <a href="#">LSVGSVYRPNQNGRGLPDLVPDPNYVQASTYVQR</a> |
| 10.9  | 3760.8809 | 2.0121 | <a href="#">LSVGSVYRPNQNGRGLPDLVPDPNYVQASTYVQR</a> |
| 10.9  | 3760.8809 | 2.0121 | <a href="#">LSVGSVYRPNQNGRGLPDLVPDPNYVQASTYVQR</a> |
| 10.9  | 3760.8809 | 2.0121 | <a href="#">LSVGSVYRPNQNGRGLPDLVPDPNYVQASTYVQR</a> |
| 1.4   | 3760.8809 | 2.0121 | <a href="#">LSVGSVYRPNQNGRGLPDLVPDPNYVQASTYVQR</a> |

Mascot: <http://www.matrixscience.com/>

# Mascot Search Results

## Peptide View

MS/MS Fragmentation of **LSVGSVYRPNQNGRGLPDLVDPDNYVQASTYVQR**

Found in **Q08397** in **uni\_human\_nr**, LOXLI\_HUMAN Lysyl oxidase homolog 1 OS=Homo sapiens GN=LOXLI PE=1 SV=2

Match to Query 19604: 3760.901056 from(941.232540,4+) intensity(1145813.7500) rtinseconds(2733) scans(17188) index(13750)

Title: 130801\_HPL\_Human\_Plaque\_BR1\_TR1\_04\_Spectrum036748\_scans\_\_17188\_RTINSECONDS=2733

Data file E:\\RAW\\HumanPlaques\\imgf\\T\\1D\\T130801\_HPL\_Human\_Plaque\_BR1\_TR1\_04.mgf

Click mouse within plot area to zoom in by factor of two about that point

Or,  to  Da

Label all possible matches  Label matches used for scoring

Show Y-axis

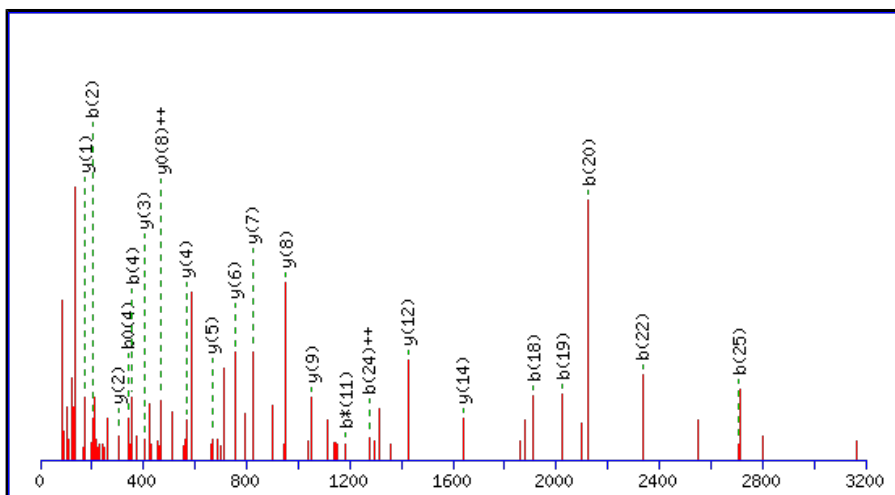

Monoisotopic mass of neutral peptide **Mr(calc):** 3759.8969

**Fixed modifications:** Carbamidomethyl (C) (apply to specified residues or termini only)

**Variable modifications:**

N12 : Deamidated (NQ)

**Ions Score:** 37 **Expect:** 0.013

**Matches :** 22/372 fragment ions using 58 most intense peaks ([help](#))

| #  | b                | b <sup>++</sup> | b <sup>*</sup>   | b <sup>***</sup> | b <sup>0</sup>  | b <sup>0++</sup> | Seq. | y         | y <sup>++</sup> | y <sup>*</sup> | y <sup>***</sup> | y <sup>0</sup> | y <sup>0++</sup> | #  |
|----|------------------|-----------------|------------------|------------------|-----------------|------------------|------|-----------|-----------------|----------------|------------------|----------------|------------------|----|
| 1  | 114.0913         | 57.5493         |                  |                  |                 |                  | L    |           |                 |                |                  |                |                  | 34 |
| 2  | <b>201.1234</b>  | 101.0653        |                  |                  | 183.1128        | 92.0600          | S    | 3647.8201 | 1824.4137       | 3630.7936      | 1815.9004        | 3629.8095      | 1815.4084        | 33 |
| 3  | 300.1918         | 150.5995        |                  |                  | 282.1812        | 141.5942         | V    | 3560.7881 | 1780.8977       | 3543.7615      | 1772.3844        | 3542.7775      | 1771.8924        | 32 |
| 4  | <b>357.2132</b>  | 179.1103        |                  |                  | <b>339.2027</b> | 170.1050         | G    | 3461.7197 | 1731.3635       | 3444.6931      | 1722.8502        | 3443.7091      | 1722.3582        | 31 |
| 5  | 444.2453         | 222.6263        |                  |                  | 426.2347        | 213.6210         | S    | 3404.6982 | 1702.8527       | 3387.6716      | 1694.3395        | 3386.6876      | 1693.8475        | 30 |
| 6  | 543.3137         | 272.1605        |                  |                  | 525.3031        | 263.1552         | V    | 3317.6662 | 1659.3367       | 3300.6396      | 1650.8234        | 3299.6556      | 1650.3314        | 29 |
| 7  | 706.3770         | 353.6921        |                  |                  | 688.3665        | 344.6869         | Y    | 3218.5978 | 1609.8025       | 3201.5712      | 1601.2892        | 3200.5872      | 1600.7972        | 28 |
| 8  | 862.4781         | 431.7427        | 845.4516         | 423.2294         | 844.4676        | 422.7374         | R    | 3055.5344 | 1528.2708       | 3038.5079      | 1519.7576        | 3037.5239      | 1519.2656        | 27 |
| 9  | 959.5309         | 480.2691        | 942.5043         | 471.7558         | 941.5203        | 471.2638         | P    | 2899.4333 | 1450.2203       | 2882.4068      | 1441.7070        | 2881.4227      | 1441.2150        | 26 |
| 10 | 1073.5738        | 537.2905        | 1056.5473        | 528.7773         | 1055.5633       | 528.2853         | N    | 2802.3805 | 1401.6939       | 2785.3540      | 1393.1806        | 2784.3700      | 1392.6886        | 25 |
| 11 | 1201.6324        | 601.3198        | <b>1184.6058</b> | 592.8066         | 1183.6218       | 592.3146         | Q    | 2688.3376 | 1344.6724       | 2671.3111      | 1336.1592        | 2670.3271      | 1335.6672        | 24 |
| 12 | 1316.6593        | 658.8333        | 1299.6328        | 650.3200         | 1298.6488       | 649.8280         | N    | 2560.2790 | 1280.6432       | 2543.2525      | 1272.1299        | 2542.2685      | 1271.6379        | 23 |
| 13 | 1373.6808        | 687.3440        | 1356.6543        | 678.8308         | 1355.6702       | 678.3388         | G    | 2445.2521 | 1223.1297       | 2428.2256      | 1214.6164        | 2427.2415      | 1214.1244        | 22 |
| 14 | 1529.7819        | 765.3946        | 1512.7554        | 756.8813         | 1511.7714       | 756.3893         | R    | 2388.2306 | 1194.6190       | 2371.2041      | 1186.1057        | 2370.2201      | 1185.6137        | 21 |
| 15 | 1586.8034        | 793.9053        | 1569.7768        | 785.3921         | 1568.7928       | 784.9000         | G    | 2232.1295 | 1116.5684       | 2215.1030      | 1108.0551        | 2214.1190      | 1107.5631        | 20 |
| 16 | 1699.8874        | 850.4474        | 1682.8609        | 841.9341         | 1681.8769       | 841.4421         | L    | 2175.1081 | 1088.0577       | 2158.0815      | 1079.5444        | 2157.0975      | 1079.0524        | 19 |
| 17 | 1796.9402        | 898.9737        | 1779.9137        | 890.4605         | 1778.9296       | 889.9685         | P    | 2062.0240 | 1031.5156       | 2044.9974      | 1023.0024        | 2044.0134      | 1022.5104        | 18 |
| 18 | <b>1911.9671</b> | 956.4872        | 1894.9406        | 947.9739         | 1893.9566       | 947.4819         | D    | 1964.9712 | 982.9893        | 1947.9447      | 974.4760         | 1946.9607      | 973.9840         | 17 |



|    |                  |           |                  |           |           |           |           |           |                  |           |           |           |           |    |
|----|------------------|-----------|------------------|-----------|-----------|-----------|-----------|-----------|------------------|-----------|-----------|-----------|-----------|----|
| 19 | <b>2025.0512</b> | 1013.0292 | 2008.0247        | 1004.5160 | 2007.0406 | 1004.0240 | L         | 1849.9443 | 925.4758         | 1832.9177 | 916.9625  | 1831.9337 | 916.4705  | 16 |
| 20 | <b>2124.1196</b> | 1062.5635 | 2107.0931        | 1054.0502 | 2106.1091 | 1053.5582 | V         | 1736.8602 | 868.9338         | 1719.8337 | 860.4205  | 1718.8497 | 859.9285  | 15 |
| 21 |                  | 2221.1724 | 1111.0898        | 2204.1458 | 1102.5766 | 2203.1618 | 1102.0846 | P         | <b>1637.7918</b> | 819.3995  | 1620.7653 | 810.8863  | 1619.7812 | 14 |
| 22 | <b>2336.1993</b> | 1168.6033 | 2319.1728        | 1160.0900 | 2318.1888 | 1159.5980 | D         | 1540.7390 | 770.8732         | 1523.7125 | 762.3599  | 1522.7285 | 761.8679  | 13 |
| 23 |                  | 2433.2521 | 1217.1297        | 2416.2255 | 1208.6164 | 2415.2415 | 1208.1244 | P         | <b>1425.7121</b> | 713.3597  | 1408.6856 | 704.8464  | 1407.7015 | 12 |
| 24 |                  | 2547.2950 | <b>1274.1512</b> | 2530.2685 | 1265.6379 | 2529.2845 | 1265.1459 | N         | 1328.6593        | 664.8333  | 1311.6328 | 656.3200  | 1310.6488 | 11 |
| 25 | <b>2710.3584</b> | 1355.6828 | 2693.3318        | 1347.1695 | 2692.3478 | 1346.6775 | Y         | 1214.6164 | 607.8118         | 1197.5899 | 599.2986  | 1196.6059 | 598.8066  | 10 |
| 26 |                  | 2809.4268 | 1405.2170        | 2792.4002 | 1396.7037 | 2791.4162 | 1396.2117 | V         | <b>1051.5531</b> | 526.2802  | 1034.5265 | 517.7669  | 1033.5425 | 9  |
| 27 |                  | 2937.4853 | 1469.2463        | 2920.4588 | 1460.7330 | 2919.4748 | 1460.2410 | Q         | <b>952.4847</b>  | 476.7460  | 935.4581  | 468.2327  | 934.4741  | 8  |
| 28 |                  | 3008.5225 | 1504.7649        | 2991.4959 | 1496.2516 | 2990.5119 | 1495.7596 | A         | <b>824.4261</b>  | 412.7167  | 807.3995  | 404.2034  | 806.4155  | 7  |
| 29 |                  | 3095.5545 | 1548.2809        | 3078.5279 | 1539.7676 | 3077.5439 | 1539.2756 | S         | <b>753.3890</b>  | 377.1981  | 736.3624  | 368.6849  | 735.3784  | 6  |
| 30 |                  | 3196.6022 | 1598.8047        | 3179.5756 | 1590.2914 | 3178.5916 | 1589.7994 | T         | <b>666.3570</b>  | 333.6821  | 649.3304  | 325.1688  | 648.3464  | 5  |
| 31 |                  | 3359.6655 | 1680.3364        | 3342.6389 | 1671.8231 | 3341.6549 | 1671.3311 | Y         | <b>565.3093</b>  | 283.1583  | 548.2827  | 274.6450  |           | 4  |
| 32 |                  | 3458.7339 | 1729.8706        | 3441.7074 | 1721.3573 | 3440.7233 | 1720.8653 | V         | <b>402.2459</b>  | 201.6266  | 385.2194  | 193.1133  |           | 3  |
| 33 |                  | 3586.7925 | 1793.8999        | 3569.7659 | 1785.3866 | 3568.7819 | 1784.8946 | Q         | <b>303.1775</b>  | 152.0924  | 286.1510  | 143.5791  |           | 2  |
| 34 |                  |           |                  |           |           |           |           | R         | <b>175.1190</b>  | 88.0631   | 158.0924  | 79.5498   |           | 1  |

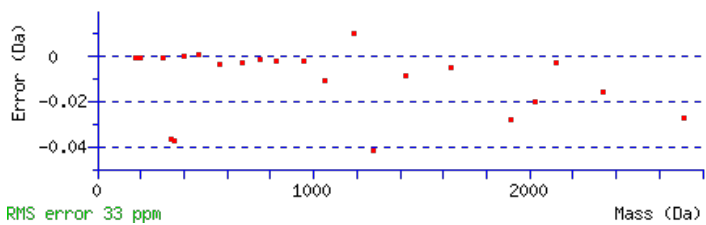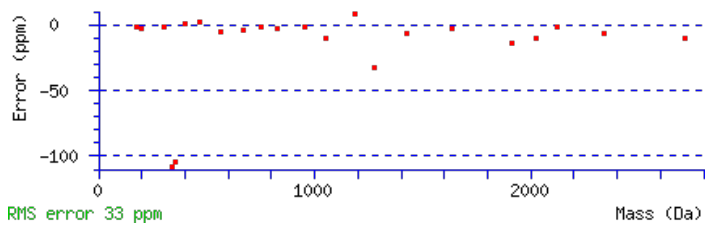

NCBI BLAST search of [LSVGSVYRPNQNGRGLPDLVPDPNYVQASTYVQR](#)

(Parameters: blastp, nr protein database, expect=20000, no filter, PAM30)

Other BLAST [web gateways](#)

All matches to this query

| Score | Mr(calc)  | Delta  | Sequence                                           | Site Analysis         |
|-------|-----------|--------|----------------------------------------------------|-----------------------|
| 37.2  | 3759.8969 | 1.0042 | <a href="#">LSVGSVYRPNQNGRGLPDLVPDPNYVQASTYVQR</a> | Deamidated N12 33.24% |
| 37.2  | 3759.8969 | 1.0042 | <a href="#">LSVGSVYRPNQNGRGLPDLVPDPNYVQASTYVQR</a> | Deamidated Q11 33.24% |
| 37.2  | 3759.8969 | 1.0042 | <a href="#">LSVGSVYRPNQNGRGLPDLVPDPNYVQASTYVQR</a> | Deamidated N10 33.24% |
| 25.8  | 3758.9129 | 1.9882 | <a href="#">LSVGSVYRPNQNGRGLPDLVPDPNYVQASTYVQR</a> |                       |
| 16.1  | 3759.8969 | 1.0042 | <a href="#">LSVGSVYRPNQNGRGLPDLVPDPNYVQASTYVQR</a> | Deamidated N24 0.25%  |
| 1.8   | 3759.8969 | 1.0042 | <a href="#">LSVGSVYRPNQNGRGLPDLVPDPNYVQASTYVQR</a> | Deamidated Q27 0.01%  |

Mascot: <http://www.matrixscience.com/>

# Mascot Search Results

## Peptide View

MS/MS Fragmentation of **SNGRGGSQAGGSGSAGQYGS DQQHHLGSGSGAGGTGGPAGQAGR**

Found in **Q9NP98** in **uni\_human\_nr**, MYOZ1\_HUMAN Myozenin-1 OS=Homo sapiens GN=MYOZ1 PE=1 SV=1

Match to Query 18184: 3882.697070 from(777.546690,5+) intensity(418300.5313) rtinseconds(1006) scans(4114) index(2306)

Title: 130806\_HPL\_Human\_Plaque\_BR1\_TR2\_07\_Spectrum024277\_scans\_4114\_RTINSECONDS=1006

Data file E:\\RAW\\HumanPlaques\\imgf\\T\\1D\\T130806\_HPL\_Human\_Plaque\_BR1\_TR2\_07.mgf

Click mouse within plot area to zoom in by factor of two about that point

Or, to Da

Label all possible matches Label matches used for scoring

Show Y-axis

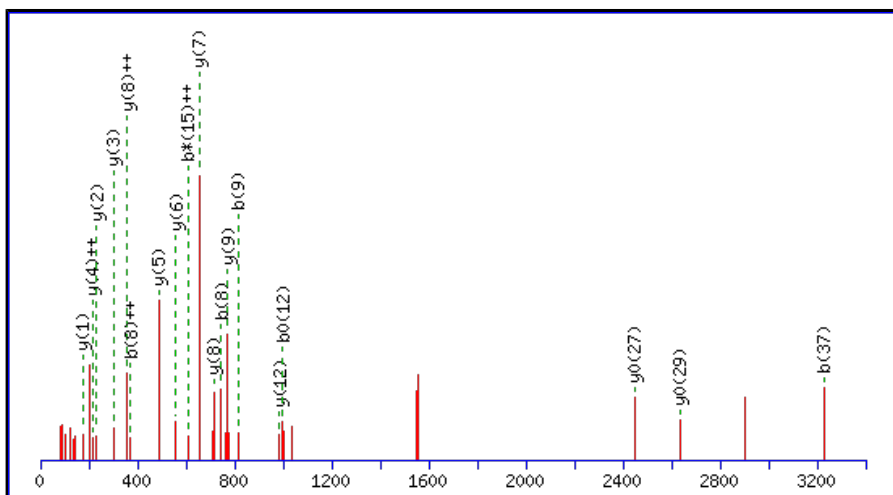

Monoisotopic mass of neutral peptide **Mr(calc): 3882.6999**

Fixed modifications: Carbamidomethyl (C) (apply to specified residues or termini only)

Variable modifications:

Q8 : Deamidated (NQ)

Ions Score: 39 Expect: 0.0037

Matches : 19/496 fragment ions using 34 most intense peaks ([help](#))

| #  | b               | b <sup>++</sup> | b <sup>*</sup> | b <sup>***</sup> | b <sup>0</sup>  | b <sup>0++</sup> | Seq. | y         | y <sup>++</sup> | y <sup>*</sup> | y <sup>***</sup> | y <sup>0</sup>   | y <sup>0++</sup> | #  |
|----|-----------------|-----------------|----------------|------------------|-----------------|------------------|------|-----------|-----------------|----------------|------------------|------------------|------------------|----|
| 1  | 88.0393         | 44.5233         |                |                  | 70.0287         | 35.5180          | S    |           |                 |                |                  |                  |                  | 44 |
| 2  | 202.0822        | 101.5448        | 185.0557       | 93.0315          | 184.0717        | 92.5395          | N    | 3796.6751 | 1898.8412       | 3779.6486      | 1890.3279        | 3778.6646        | 1889.8359        | 43 |
| 3  | 259.1037        | 130.0555        | 242.0771       | 121.5422         | 241.0931        | 121.0502         | G    | 3682.6322 | 1841.8197       | 3665.6056      | 1833.3065        | 3664.6216        | 1832.8145        | 42 |
| 4  | 415.2048        | 208.1060        | 398.1783       | 199.5928         | 397.1942        | 199.1008         | R    | 3625.6107 | 1813.3090       | 3608.5842      | 1804.7957        | 3607.6002        | 1804.3037        | 41 |
| 5  | 472.2263        | 236.6168        | 455.1997       | 228.1035         | 454.2157        | 227.6115         | G    | 3469.5096 | 1735.2584       | 3452.4831      | 1726.7452        | 3451.4991        | 1726.2532        | 40 |
| 6  | 529.2477        | 265.1275        | 512.2212       | 256.6142         | 511.2372        | 256.1222         | G    | 3412.4882 | 1706.7477       | 3395.4616      | 1698.2344        | 3394.4776        | 1697.7424        | 39 |
| 7  | 616.2798        | 308.6435        | 599.2532       | 300.1302         | 598.2692        | 299.6382         | S    | 3355.4667 | 1678.2370       | 3338.4401      | 1669.7237        | 3337.4561        | 1669.2317        | 38 |
| 8  | <b>745.3224</b> | <b>373.1648</b> | 728.2958       | 364.6515         | 727.3118        | 364.1595         | Q    | 3268.4347 | 1634.7210       | 3251.4081      | 1626.2077        | 3250.4241        | 1625.7157        | 37 |
| 9  | <b>816.3595</b> | 408.6834        | 799.3329       | 400.1701         | 798.3489        | 399.6781         | A    | 3139.3921 | 1570.1997       | 3122.3655      | 1561.6864        | 3121.3815        | 1561.1944        | 36 |
| 10 | 873.3809        | 437.1941        | 856.3544       | 428.6808         | 855.3704        | 428.1888         | G    | 3068.3550 | 1534.6811       | 3051.3284      | 1526.1678        | 3050.3444        | 1525.6758        | 35 |
| 11 | 930.4024        | 465.7048        | 913.3758       | 457.1916         | 912.3918        | 456.6996         | G    | 3011.3335 | 1506.1704       | 2994.3069      | 1497.6571        | 2993.3229        | 1497.1651        | 34 |
| 12 | 1017.4344       | 509.2209        | 1000.4079      | 500.7076         | <b>999.4239</b> | 500.2156         | S    | 2954.3120 | 1477.6597       | 2937.2855      | 1469.1464        | 2936.3015        | 1468.6544        | 33 |
| 13 | 1074.4559       | 537.7316        | 1057.4293      | 529.2183         | 1056.4453       | 528.7263         | G    | 2867.2800 | 1434.1436       | 2850.2535      | 1425.6304        | 2849.2694        | 1425.1384        | 32 |
| 14 | 1161.4879       | 581.2476        | 1144.4614      | 572.7343         | 1143.4774       | 572.2423         | S    | 2810.2585 | 1405.6329       | 2793.2320      | 1397.1196        | 2792.2480        | 1396.6276        | 31 |
| 15 | 1232.5250       | 616.7662        | 1215.4985      | <b>608.2529</b>  | 1214.5145       | 607.7609         | A    | 2723.2265 | 1362.1169       | 2706.2000      | 1353.6036        | 2705.2159        | 1353.1116        | 30 |
| 16 | 1289.5465       | 645.2769        | 1272.5199      | 636.7636         | 1271.5359       | 636.2716         | G    | 2652.1894 | 1326.5983       | 2635.1628      | 1318.0851        | <b>2634.1788</b> | 1317.5931        | 29 |
| 17 | 1417.6051       | 709.3062        | 1400.5785      | 700.7929         | 1399.5945       | 700.3009         | Q    | 2595.1679 | 1298.0876       | 2578.1414      | 1289.5743        | 2577.1574        | 1289.0823        | 28 |
| 18 | 1580.6684       | 790.8378        | 1563.6419      | 782.3246         | 1562.6578       | 781.8326         | Y    | 2467.1094 | 1234.0583       | 2450.0828      | 1225.5450        | <b>2449.0988</b> | 1225.0530        | 27 |

|    |           |           |           |           |           |           |   |           |           |           |           |           |           |    |
|----|-----------|-----------|-----------|-----------|-----------|-----------|---|-----------|-----------|-----------|-----------|-----------|-----------|----|
| 19 | 1637.6899 | 819.3486  | 1620.6633 | 810.8353  | 1619.6793 | 810.3433  | G | 2304.0460 | 1152.5267 | 2287.0195 | 1144.0134 | 2286.0355 | 1143.5214 | 26 |
| 20 | 1724.7219 | 862.8646  | 1707.6953 | 854.3513  | 1706.7113 | 853.8593  | S | 2247.0246 | 1124.0159 | 2229.9980 | 1115.5026 | 2229.0140 | 1115.0106 | 25 |
| 21 | 1839.7488 | 920.3781  | 1822.7223 | 911.8648  | 1821.7383 | 911.3728  | D | 2159.9925 | 1080.4999 | 2142.9660 | 1071.9866 | 2141.9820 | 1071.4946 | 24 |
| 22 | 1967.8074 | 984.4073  | 1950.7809 | 975.8941  | 1949.7969 | 975.4021  | Q | 2044.9656 | 1022.9864 | 2027.9390 | 1014.4732 | 2026.9550 | 1013.9812 | 23 |
| 23 | 2095.8660 | 1048.4366 | 2078.8394 | 1039.9234 | 2077.8554 | 1039.4314 | Q | 1916.9070 | 958.9571  | 1899.8805 | 950.4439  | 1898.8964 | 949.9519  | 22 |
| 24 | 2232.9249 | 1116.9661 | 2215.8984 | 1108.4528 | 2214.9143 | 1107.9608 | H | 1788.8484 | 894.9279  | 1771.8219 | 886.4146  | 1770.8379 | 885.9226  | 21 |
| 25 | 2369.9838 | 1185.4955 | 2352.9573 | 1176.9823 | 2351.9733 | 1176.4903 | H | 1651.7895 | 826.3984  | 1634.7630 | 817.8851  | 1633.7790 | 817.3931  | 20 |
| 26 | 2483.0679 | 1242.0376 | 2466.0413 | 1233.5243 | 2465.0573 | 1233.0323 | L | 1514.7306 | 757.8689  | 1497.7041 | 749.3557  | 1496.7200 | 748.8637  | 19 |
| 27 | 2540.0893 | 1270.5483 | 2523.0628 | 1262.0350 | 2522.0788 | 1261.5430 | G | 1401.6465 | 701.3269  | 1384.6200 | 692.8136  | 1383.6360 | 692.3216  | 18 |
| 28 | 2627.1214 | 1314.0643 | 2610.0948 | 1305.5511 | 2609.1108 | 1305.0590 | S | 1344.6251 | 672.8162  | 1327.5985 | 664.3029  | 1326.6145 | 663.8109  | 17 |
| 29 | 2684.1428 | 1342.5751 | 2667.1163 | 1334.0618 | 2666.1323 | 1333.5698 | G | 1257.5931 | 629.3002  | 1240.5665 | 620.7869  | 1239.5825 | 620.2949  | 16 |
| 30 | 2771.1749 | 1386.0911 | 2754.1483 | 1377.5778 | 2753.1643 | 1377.0858 | S | 1200.5716 | 600.7894  | 1183.5450 | 592.2762  | 1182.5610 | 591.7842  | 15 |
| 31 | 2828.1963 | 1414.6018 | 2811.1698 | 1406.0885 | 2810.1858 | 1405.5965 | G | 1113.5396 | 557.2734  | 1096.5130 | 548.7601  | 1095.5290 | 548.2681  | 14 |
| 32 | 2899.2334 | 1450.1204 | 2882.2069 | 1441.6071 | 2881.2229 | 1441.1151 | A | 1056.5181 | 528.7627  | 1039.4916 | 520.2494  | 1038.5075 | 519.7574  | 13 |
| 33 | 2956.2549 | 1478.6311 | 2939.2284 | 1470.1178 | 2938.2443 | 1469.6258 | G | 985.4810  | 493.2441  | 968.4544  | 484.7309  | 967.4704  | 484.2388  | 12 |
| 34 | 3013.2764 | 1507.1418 | 2996.2498 | 1498.6285 | 2995.2658 | 1498.1365 | G | 928.4595  | 464.7334  | 911.4330  | 456.2201  | 910.4490  | 455.7281  | 11 |
| 35 | 3114.3241 | 1557.6657 | 3097.2975 | 1549.1524 | 3096.3135 | 1548.6604 | T | 871.4381  | 436.2227  | 854.4115  | 427.7094  | 853.4275  | 427.2174  | 10 |
| 36 | 3171.3455 | 1586.1764 | 3154.3190 | 1577.6631 | 3153.3349 | 1577.1711 | G | 770.3904  | 385.6988  | 753.3638  | 377.1856  |           |           | 9  |
| 37 | 3228.3670 | 1614.6871 | 3211.3404 | 1606.1739 | 3210.3564 | 1605.6818 | G | 713.3689  | 357.1881  | 696.3424  | 348.6748  |           |           | 8  |
| 38 | 3325.4197 | 1663.2135 | 3308.3932 | 1654.7002 | 3307.4092 | 1654.2082 | P | 656.3475  | 328.6774  | 639.3209  | 320.1641  |           |           | 7  |
| 39 | 3396.4569 | 1698.7321 | 3379.4303 | 1690.2188 | 3378.4463 | 1689.7268 | A | 559.2947  | 280.1510  | 542.2681  | 271.6377  |           |           | 6  |
| 40 | 3453.4783 | 1727.2428 | 3436.4518 | 1718.7295 | 3435.4678 | 1718.2375 | G | 488.2576  | 244.6324  | 471.2310  | 236.1191  |           |           | 5  |
| 41 | 3581.5369 | 1791.2721 | 3564.5103 | 1782.7588 | 3563.5263 | 1782.2668 | Q | 431.2361  | 216.1217  | 414.2096  | 207.6084  |           |           | 4  |
| 42 | 3652.5740 | 1826.7906 | 3635.5475 | 1818.2774 | 3634.5634 | 1817.7854 | A | 303.1775  | 152.0924  | 286.1510  | 143.5791  |           |           | 3  |
| 43 | 3709.5955 | 1855.3014 | 3692.5689 | 1846.7881 | 3691.5849 | 1846.2961 | G | 232.1404  | 116.5738  | 215.1139  | 108.0606  |           |           | 2  |
| 44 |           |           |           |           |           |           | R | 175.1190  | 88.0631   | 158.0924  | 79.5498   |           |           | 1  |

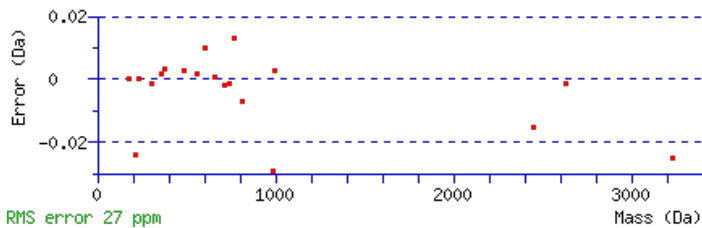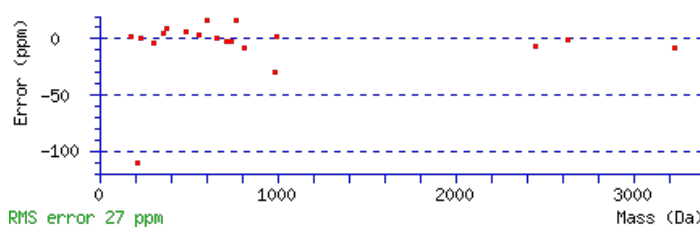

NCBI BLAST search of [SNGRGGSQAGGSGSAGQYGS DQQHHLGSGSGAGGTGGPAGQAGR](#)  
 (Parameters: blastp, nr protein database, expect=20000, no filter, PAM30)  
 Other BLAST [web gateways](#)

All matches to this query

| Score | Mr(calc)  | Delta   | Sequence                                                      | Site Analysis        |
|-------|-----------|---------|---------------------------------------------------------------|----------------------|
| 39.3  | 3882.6999 | -0.0029 | <a href="#">SNGRGGSQAGGSGSAGQYGS DQQHHLGSGSGAGGTGGPAGQAGR</a> | Deamidated Q8 40.09% |
| 39.3  | 3882.6999 | -0.0029 | <a href="#">SNGRGGSQAGGSGSAGQYGS DQQHHLGSGSGAGGTGGPAGQAGR</a> | Deamidated N2 40.09% |
| 31.5  | 3882.6999 | -0.0029 | <a href="#">SNGRGGSQAGGSGSAGQYGS DQQHHLGSGSGAGGTGGPAGQAGR</a> | Deamidated Q23 6.65% |
| 31.5  | 3882.6999 | -0.0029 | <a href="#">SNGRGGSQAGGSGSAGQYGS DQQHHLGSGSGAGGTGGPAGQAGR</a> | Deamidated Q22 6.65% |
| 31.4  | 3882.6999 | -0.0029 | <a href="#">SNGRGGSQAGGSGSAGQYGS DQQHHLGSGSGAGGTGGPAGQAGR</a> | Deamidated Q17 6.52% |
| 3.0   | 3881.6792 | 1.0179  | <a href="#">QGAACRTSECCFQPPYPDADSGSLPGSASGPRDLR</a>           |                      |

Mascot: <http://www.matrixscience.com/>

# Mascot Search Results

## Peptide View

MS/MS Fragmentation of **SNGRGGSQAGGSGSAGQYGS DQQHHLGSGSGAGGTGGPAGQAGR**

Found in **Q9NP98** in **uni\_human\_nr**, MYOZ1\_HUMAN Myozenin-1 OS=Homo sapiens GN=MYOZ1 PE=1 SV=1

Match to Query 18185: 3882.703470 from(777.547970,5+) intensity(93002.0625) rtinseconds(1043) scans(4375) index(2533)

Title: 130806\_HPL\_Human\_Plaque\_BR1\_TR2\_07\_Spectrum024504\_scans\_4375\_RTINSECONDS=1043

Data file E:\\RAW\\HumanPlaques\\imgf\\T\\1D\\T130806\_HPL\_Human\_Plaque\_BR1\_TR2\_07.mgf

Click mouse within plot area to zoom in by factor of two about that point

Or,  to  Da  
 Label all possible matches  Label matches used for scoring   
 Show Y-axis

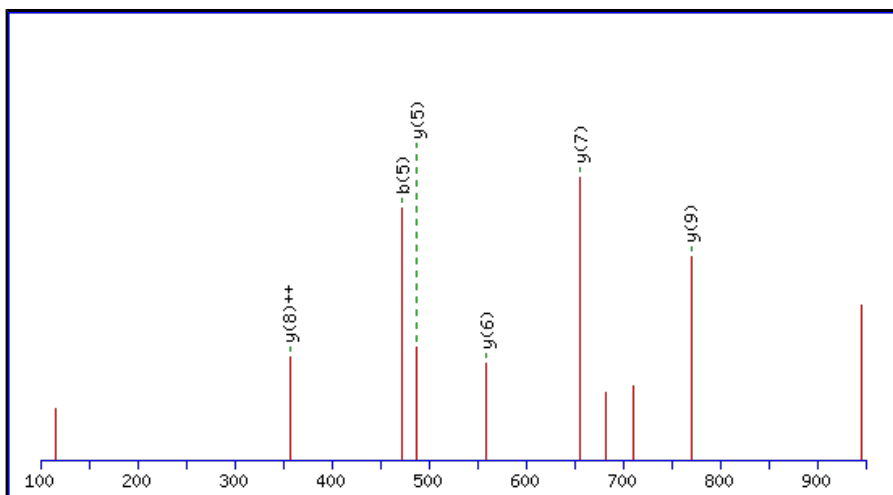

Monoisotopic mass of neutral peptide Mr(calc): 3882.6999

Fixed modifications: Carbamidomethyl (C) (apply to specified residues or termini only)

Variable modifications:

N2 : Deamidated (NQ)

Ions Score: 23 Expect: 0.15

Matches : 6/496 fragment ions using 9 most intense peaks ([help](#))

| #  | b               | b <sup>++</sup> | b <sup>*</sup> | b <sup>***</sup> | b <sup>0</sup> | b <sup>0++</sup> | Seq. | y         | y <sup>++</sup> | y <sup>*</sup> | y <sup>***</sup> | y <sup>0</sup> | y <sup>0++</sup> | #  |
|----|-----------------|-----------------|----------------|------------------|----------------|------------------|------|-----------|-----------------|----------------|------------------|----------------|------------------|----|
| 1  | 88.0393         | 44.5233         |                |                  | 70.0287        | 35.5180          | S    |           |                 |                |                  |                |                  | 44 |
| 2  | 203.0662        | 102.0368        | 186.0397       | 93.5235          | 185.0557       | 93.0315          | N    | 3796.6751 | 1898.8412       | 3779.6486      | 1890.3279        | 3778.6646      | 1889.8359        | 43 |
| 3  | 260.0877        | 130.5475        | 243.0612       | 122.0342         | 242.0771       | 121.5422         | G    | 3681.6482 | 1841.3277       | 3664.6216      | 1832.8145        | 3663.6376      | 1832.3224        | 42 |
| 4  | 416.1888        | 208.5980        | 399.1623       | 200.0848         | 398.1783       | 199.5928         | R    | 3624.6267 | 1812.8170       | 3607.6002      | 1804.3037        | 3606.6162      | 1803.8117        | 41 |
| 5  | <b>473.2103</b> | 237.1088        | 456.1837       | 228.5955         | 455.1997       | 228.1035         | G    | 3468.5256 | 1734.7664       | 3451.4991      | 1726.2532        | 3450.5150      | 1725.7612        | 40 |
| 6  | 530.2318        | 265.6195        | 513.2052       | 257.1062         | 512.2212       | 256.6142         | G    | 3411.5041 | 1706.2557       | 3394.4776      | 1697.7424        | 3393.4936      | 1697.2504        | 39 |
| 7  | 617.2638        | 309.1355        | 600.2372       | 300.6223         | 599.2532       | 300.1302         | S    | 3354.4827 | 1677.7450       | 3337.4561      | 1669.2317        | 3336.4721      | 1668.7397        | 38 |
| 8  | 745.3224        | 373.1648        | 728.2958       | 364.6515         | 727.3118       | 364.1595         | Q    | 3267.4507 | 1634.2290       | 3250.4241      | 1625.7157        | 3249.4401      | 1625.2237        | 37 |
| 9  | 816.3595        | 408.6834        | 799.3329       | 400.1701         | 798.3489       | 399.6781         | A    | 3139.3921 | 1570.1997       | 3122.3655      | 1561.6864        | 3121.3815      | 1561.1944        | 36 |
| 10 | 873.3809        | 437.1941        | 856.3544       | 428.6808         | 855.3704       | 428.1888         | G    | 3068.3550 | 1534.6811       | 3051.3284      | 1526.1678        | 3050.3444      | 1525.6758        | 35 |
| 11 | 930.4024        | 465.7048        | 913.3758       | 457.1916         | 912.3918       | 456.6996         | G    | 3011.3335 | 1506.1704       | 2994.3069      | 1497.6571        | 2993.3229      | 1497.1651        | 34 |
| 12 | 1017.4344       | 509.2209        | 1000.4079      | 500.7076         | 999.4239       | 500.2156         | S    | 2954.3120 | 1477.6597       | 2937.2855      | 1469.1464        | 2936.3015      | 1468.6544        | 33 |
| 13 | 1074.4559       | 537.7316        | 1057.4293      | 529.2183         | 1056.4453      | 528.7263         | G    | 2867.2800 | 1434.1436       | 2850.2535      | 1425.6304        | 2849.2694      | 1425.1384        | 32 |
| 14 | 1161.4879       | 581.2476        | 1144.4614      | 572.7343         | 1143.4774      | 572.2423         | S    | 2810.2585 | 1405.6329       | 2793.2320      | 1397.1196        | 2792.2480      | 1396.6276        | 31 |
| 15 | 1232.5250       | 616.7662        | 1215.4985      | 608.2529         | 1214.5145      | 607.7609         | A    | 2723.2265 | 1362.1169       | 2706.2000      | 1353.6036        | 2705.2159      | 1353.1116        | 30 |
| 16 | 1289.5465       | 645.2769        | 1272.5199      | 636.7636         | 1271.5359      | 636.2716         | G    | 2652.1894 | 1326.5983       | 2635.1628      | 1318.0851        | 2634.1788      | 1317.5931        | 29 |
| 17 | 1417.6051       | 709.3062        | 1400.5785      | 700.7929         | 1399.5945      | 700.3009         | Q    | 2595.1679 | 1298.0876       | 2578.1414      | 1289.5743        | 2577.1574      | 1289.0823        | 28 |
| 18 | 1580.6684       | 790.8378        | 1563.6419      | 782.3246         | 1562.6578      | 781.8326         | Y    | 2467.1094 | 1234.0583       | 2450.0828      | 1225.5450        | 2449.0988      | 1225.0530        | 27 |

|    |           |           |           |           |           |           |   |           |           |           |           |           |           |    |
|----|-----------|-----------|-----------|-----------|-----------|-----------|---|-----------|-----------|-----------|-----------|-----------|-----------|----|
| 19 | 1637.6899 | 819.3486  | 1620.6633 | 810.8353  | 1619.6793 | 810.3433  | G | 2304.0460 | 1152.5267 | 2287.0195 | 1144.0134 | 2286.0355 | 1143.5214 | 26 |
| 20 | 1724.7219 | 862.8646  | 1707.6953 | 854.3513  | 1706.7113 | 853.8593  | S | 2247.0246 | 1124.0159 | 2229.9980 | 1115.5026 | 2229.0140 | 1115.0106 | 25 |
| 21 | 1839.7488 | 920.3781  | 1822.7223 | 911.8648  | 1821.7383 | 911.3728  | D | 2159.9925 | 1080.4999 | 2142.9660 | 1071.9866 | 2141.9820 | 1071.4946 | 24 |
| 22 | 1967.8074 | 984.4073  | 1950.7809 | 975.8941  | 1949.7969 | 975.4021  | Q | 2044.9656 | 1022.9864 | 2027.9390 | 1014.4732 | 2026.9550 | 1013.9812 | 23 |
| 23 | 2095.8660 | 1048.4366 | 2078.8394 | 1039.9234 | 2077.8554 | 1039.4314 | Q | 1916.9070 | 958.9571  | 1899.8805 | 950.4439  | 1898.8964 | 949.9519  | 22 |
| 24 | 2232.9249 | 1116.9661 | 2215.8984 | 1108.4528 | 2214.9143 | 1107.9608 | H | 1788.8484 | 894.9279  | 1771.8219 | 886.4146  | 1770.8379 | 885.9226  | 21 |
| 25 | 2369.9838 | 1185.4955 | 2352.9573 | 1176.9823 | 2351.9733 | 1176.4903 | H | 1651.7895 | 826.3984  | 1634.7630 | 817.8851  | 1633.7790 | 817.3931  | 20 |
| 26 | 2483.0679 | 1242.0376 | 2466.0413 | 1233.5243 | 2465.0573 | 1233.0323 | L | 1514.7306 | 757.8689  | 1497.7041 | 749.3557  | 1496.7200 | 748.8637  | 19 |
| 27 | 2540.0893 | 1270.5483 | 2523.0628 | 1262.0350 | 2522.0788 | 1261.5430 | G | 1401.6465 | 701.3269  | 1384.6200 | 692.8136  | 1383.6360 | 692.3216  | 18 |
| 28 | 2627.1214 | 1314.0643 | 2610.0948 | 1305.5511 | 2609.1108 | 1305.0590 | S | 1344.6251 | 672.8162  | 1327.5985 | 664.3029  | 1326.6145 | 663.8109  | 17 |
| 29 | 2684.1428 | 1342.5751 | 2667.1163 | 1334.0618 | 2666.1323 | 1333.5698 | G | 1257.5931 | 629.3002  | 1240.5665 | 620.7869  | 1239.5825 | 620.2949  | 16 |
| 30 | 2771.1749 | 1386.0911 | 2754.1483 | 1377.5778 | 2753.1643 | 1377.0858 | S | 1200.5716 | 600.7894  | 1183.5450 | 592.2762  | 1182.5610 | 591.7842  | 15 |
| 31 | 2828.1963 | 1414.6018 | 2811.1698 | 1406.0885 | 2810.1858 | 1405.5965 | G | 1113.5396 | 557.2734  | 1096.5130 | 548.7601  | 1095.5290 | 548.2681  | 14 |
| 32 | 2899.2334 | 1450.1204 | 2882.2069 | 1441.6071 | 2881.2229 | 1441.1151 | A | 1056.5181 | 528.7627  | 1039.4916 | 520.2494  | 1038.5075 | 519.7574  | 13 |
| 33 | 2956.2549 | 1478.6311 | 2939.2284 | 1470.1178 | 2938.2443 | 1469.6258 | G | 985.4810  | 493.2441  | 968.4544  | 484.7309  | 967.4704  | 484.2388  | 12 |
| 34 | 3013.2764 | 1507.1418 | 2996.2498 | 1498.6285 | 2995.2658 | 1498.1365 | G | 928.4595  | 464.7334  | 911.4330  | 456.2201  | 910.4490  | 455.7281  | 11 |
| 35 | 3114.3241 | 1557.6657 | 3097.2975 | 1549.1524 | 3096.3135 | 1548.6604 | T | 871.4381  | 436.2227  | 854.4115  | 427.7094  | 853.4275  | 427.2174  | 10 |
| 36 | 3171.3455 | 1586.1764 | 3154.3190 | 1577.6631 | 3153.3349 | 1577.1711 | G | 770.3904  | 385.6988  | 753.3638  | 377.1856  |           |           | 9  |
| 37 | 3228.3670 | 1614.6871 | 3211.3404 | 1606.1739 | 3210.3564 | 1605.6818 | G | 713.3689  | 357.1881  | 696.3424  | 348.6748  |           |           | 8  |
| 38 | 3325.4197 | 1663.2135 | 3308.3932 | 1654.7002 | 3307.4092 | 1654.2082 | P | 656.3475  | 328.6774  | 639.3209  | 320.1641  |           |           | 7  |
| 39 | 3396.4569 | 1698.7321 | 3379.4303 | 1690.2188 | 3378.4463 | 1689.7268 | A | 559.2947  | 280.1510  | 542.2681  | 271.6377  |           |           | 6  |
| 40 | 3453.4783 | 1727.2428 | 3436.4518 | 1718.7295 | 3435.4678 | 1718.2375 | G | 488.2576  | 244.6324  | 471.2310  | 236.1191  |           |           | 5  |
| 41 | 3581.5369 | 1791.2721 | 3564.5103 | 1782.7588 | 3563.5263 | 1782.2668 | Q | 431.2361  | 216.1217  | 414.2096  | 207.6084  |           |           | 4  |
| 42 | 3652.5740 | 1826.7906 | 3635.5475 | 1818.2774 | 3634.5634 | 1817.7854 | A | 303.1775  | 152.0924  | 286.1510  | 143.5791  |           |           | 3  |
| 43 | 3709.5955 | 1855.3014 | 3692.5689 | 1846.7881 | 3691.5849 | 1846.2961 | G | 232.1404  | 116.5738  | 215.1139  | 108.0606  |           |           | 2  |
| 44 |           |           |           |           |           |           | R | 175.1190  | 88.0631   | 158.0924  | 79.5498   |           |           | 1  |

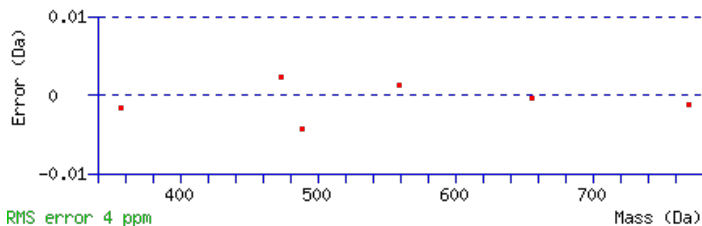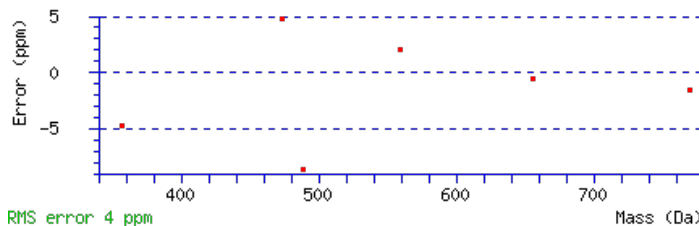

NCBI BLAST search of [SNGRGGSQAGGSGSAGQYGSDDQQHHLGSGSGAGGTGGPAGQAGR](#)  
 (Parameters: blastp, nr protein database, expect=20000, no filter, PAM30)  
 Other BLAST [web gateways](#)

All matches to this query

| Score | Mr(calc)  | Delta  | Sequence                                                      |
|-------|-----------|--------|---------------------------------------------------------------|
| 23.3  | 3882.6999 | 0.0035 | <a href="#">SNGRGGSQAGGSGSAGQYGSDDQQHHLGSGSGAGGTGGPAGQAGR</a> |
| 16.6  | 3881.7159 | 0.9876 | <a href="#">SNGRGGSQAGGSGSAGQYGSDDQQHHLGSGSGAGGTGGPAGQAGR</a> |
| 16.6  | 3882.6999 | 0.0035 | <a href="#">SNGRGGSQAGGSGSAGQYGSDDQQHHLGSGSGAGGTGGPAGQAGR</a> |
| 16.6  | 3882.6999 | 0.0035 | <a href="#">SNGRGGSQAGGSGSAGQYGSDDQQHHLGSGSGAGGTGGPAGQAGR</a> |
| 16.6  | 3882.6999 | 0.0035 | <a href="#">SNGRGGSQAGGSGSAGQYGSDDQQHHLGSGSGAGGTGGPAGQAGR</a> |
| 16.6  | 3882.6999 | 0.0035 | <a href="#">SNGRGGSQAGGSGSAGQYGSDDQQHHLGSGSGAGGTGGPAGQAGR</a> |

Mascot: <http://www.matrixscience.com/>

# Mascot Search Results

## Peptide View

MS/MS Fragmentation of **TLPNGRDALDGPAAEAPEHSFDGLR**

Found in **Q15149** in **uni\_human\_nr**, PLEC\_HUMAN Plectin OS=Homo sapiens GN=PLEC PE=1 SV=3

Match to Query 11159: 2735.278496 from(684.826900,4+) intensity(496650.0313) rtinseconds(2253) scans(12153) index(8764)

Title: 130801\_HPL\_Human\_Plaque\_BR1\_TR1\_13\_Spectrum029234\_scans\_\_12153\_RTINSECONDS=2253

Data file E:\\RAW\\HumanPlaques\\imgf\\T\\1D\\T130801\_HPL\_Human\_Plaque\_BR1\_TR1\_13.mgf

Click mouse within plot area to zoom in by factor of two about that point

Or, to Da  
 Label all possible matches Label matches used for scoring  
 Show Y-axis

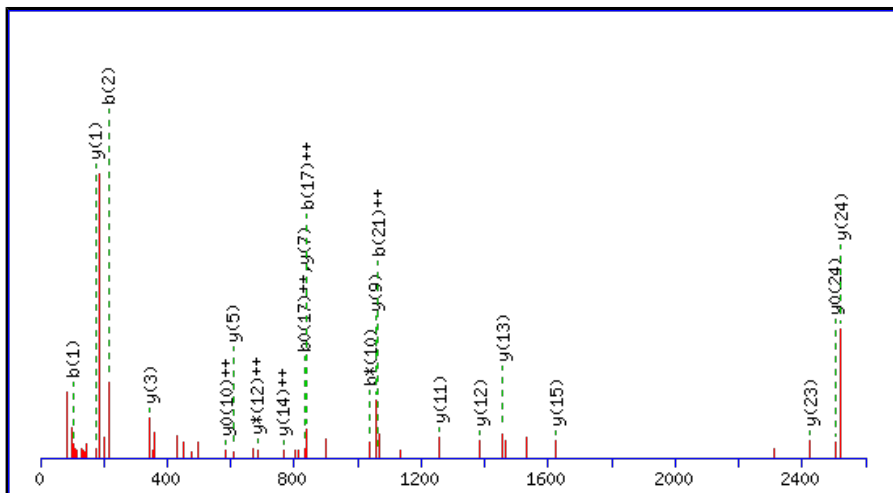

Monoisotopic mass of neutral peptide **Mr(calc): 2735.2787**

Fixed modifications: Carbamidomethyl (C) (apply to specified residues or termini only)

Variable modifications:

N4 : Deamidated (NQ)

Ions Score: 56 Expect: 0.00022

Matches : 21/288 fragment ions using 45 most intense peaks ([help](#))

| #  | b               | b <sup>++</sup> | b <sup>*</sup>   | b <sup>*++</sup> | b <sup>0</sup> | b <sup>0++</sup> | Seq. | y                | y <sup>++</sup> | y <sup>*</sup> | y <sup>*++</sup> | y <sup>0</sup>   | y <sup>0++</sup> | #  |
|----|-----------------|-----------------|------------------|------------------|----------------|------------------|------|------------------|-----------------|----------------|------------------|------------------|------------------|----|
| 1  | <b>102.0550</b> | 51.5311         |                  |                  | 84.0444        | 42.5258          | T    |                  |                 |                |                  |                  |                  | 26 |
| 2  | <b>215.1390</b> | 108.0731        |                  |                  | 197.1285       | 99.0679          | L    | 2635.2383        | 1318.1228       | 2618.2118      | 1309.6095        | 2617.2277        | 1309.1175        | 25 |
| 3  | 312.1918        | 156.5995        |                  |                  | 294.1812       | 147.5942         | P    | <b>2522.1542</b> | 1261.5808       | 2505.1277      | 1253.0675        | <b>2504.1437</b> | 1252.5755        | 24 |
| 4  | 427.2187        | 214.1130        | 410.1922         | 205.5997         | 409.2082       | 205.1077         | N    | <b>2425.1015</b> | 1213.0544       | 2408.0749      | 1204.5411        | 2407.0909        | 1204.0491        | 23 |
| 5  | 484.2402        | 242.6237        | 467.2136         | 234.1105         | 466.2296       | 233.6185         | G    | 2310.0745        | 1155.5409       | 2293.0480      | 1147.0276        | 2292.0640        | 1146.5356        | 22 |
| 6  | 640.3413        | 320.6743        | 623.3148         | 312.1610         | 622.3307       | 311.6690         | R    | 2253.0531        | 1127.0302       | 2236.0265      | 1118.5169        | 2235.0425        | 1118.0249        | 21 |
| 7  | 755.3682        | 378.1878        | 738.3417         | 369.6745         | 737.3577       | 369.1825         | D    | 2096.9520        | 1048.9796       | 2079.9254      | 1040.4663        | 2078.9414        | 1039.9743        | 20 |
| 8  | 826.4054        | 413.7063        | 809.3788         | 405.1930         | 808.3948       | 404.7010         | A    | 1981.9250        | 991.4661        | 1964.8985      | 982.9529         | 1963.9144        | 982.4609         | 19 |
| 9  | 939.4894        | 470.2483        | 922.4629         | 461.7351         | 921.4789       | 461.2431         | L    | 1910.8879        | 955.9476        | 1893.8613      | 947.4343         | 1892.8773        | 946.9423         | 18 |
| 10 | 1054.5164       | 527.7618        | <b>1037.4898</b> | 519.2485         | 1036.5058      | 518.7565         | D    | 1797.8038        | 899.4056        | 1780.7773      | 890.8923         | 1779.7933        | 890.4003         | 17 |
| 11 | 1111.5378       | 556.2726        | 1094.5113        | 547.7593         | 1093.5273      | 547.2673         | G    | 1682.7769        | 841.8921        | 1665.7503      | 833.3788         | 1664.7663        | 832.8868         | 16 |
| 12 | 1208.5906       | 604.7989        | 1191.5640        | 596.2857         | 1190.5800      | 595.7937         | P    | <b>1625.7554</b> | 813.3814        | 1608.7289      | 804.8681         | 1607.7449        | 804.3761         | 15 |
| 13 | 1279.6277       | 640.3175        | 1262.6012        | 631.8042         | 1261.6171      | 631.3122         | A    | 1528.7027        | <b>764.8550</b> | 1511.6761      | 756.3417         | 1510.6921        | 755.8497         | 14 |
| 14 | 1350.6648       | 675.8360        | 1333.6383        | 667.3228         | 1332.6543      | 666.8308         | A    | <b>1457.6655</b> | 729.3364        | 1440.6390      | 720.8231         | 1439.6550        | 720.3311         | 13 |
| 15 | 1479.7074       | 740.3573        | 1462.6809        | 731.8441         | 1461.6968      | 731.3521         | E    | <b>1386.6284</b> | 693.8179        | 1369.6019      | <b>685.3046</b>  | 1368.6179        | 684.8126         | 12 |
| 16 | 1550.7445       | 775.8759        | 1533.7180        | 767.3626         | 1532.7340      | 766.8706         | A    | <b>1257.5858</b> | 629.2966        | 1240.5593      | 620.7833         | 1239.5753        | 620.2913         | 11 |
| 17 | 1679.7871       | <b>840.3972</b> | 1662.7606        | 831.8839         | 1661.7766      | <b>831.3919</b>  | E    | 1186.5487        | 593.7780        | 1169.5222      | 585.2647         | 1168.5382        | <b>584.7727</b>  | 10 |
| 18 | 1776.8399       | 888.9236        | 1759.8133        | 880.4103         | 1758.8293      | 879.9183         | P    | <b>1057.5061</b> | 529.2567        | 1040.4796      | 520.7434         | 1039.4956        | 520.2514         | 9  |

|    |           |           |           |           |           |           |   |          |          |          |          |          |          |   |
|----|-----------|-----------|-----------|-----------|-----------|-----------|---|----------|----------|----------|----------|----------|----------|---|
| 19 | 1905.8825 | 953.4449  | 1888.8559 | 944.9316  | 1887.8719 | 944.4396  | E | 960.4534 | 480.7303 | 943.4268 | 472.2170 | 942.4428 | 471.7250 | 8 |
| 20 | 2042.9414 | 1021.9743 | 2025.9148 | 1013.4611 | 2024.9308 | 1012.9691 | H | 831.4108 | 416.2090 | 814.3842 | 407.6958 | 813.4002 | 407.2037 | 7 |
| 21 | 2129.9734 | 1065.4903 | 2112.9469 | 1056.9771 | 2111.9629 | 1056.4851 | S | 694.3519 | 347.6796 | 677.3253 | 339.1663 | 676.3413 | 338.6743 | 6 |
| 22 | 2277.0418 | 1139.0246 | 2260.0153 | 1130.5113 | 2259.0313 | 1130.0193 | F | 607.3198 | 304.1636 | 590.2933 | 295.6503 | 589.3093 | 295.1583 | 5 |
| 23 | 2392.0688 | 1196.5380 | 2375.0422 | 1188.0248 | 2374.0582 | 1187.5327 | D | 460.2514 | 230.6293 | 443.2249 | 222.1161 | 442.2409 | 221.6241 | 4 |
| 24 | 2449.0902 | 1225.0488 | 2432.0637 | 1216.5355 | 2431.0797 | 1216.0435 | G | 345.2245 | 173.1159 | 328.1979 | 164.6026 |          |          | 3 |
| 25 | 2562.1743 | 1281.5908 | 2545.1478 | 1273.0775 | 2544.1637 | 1272.5855 | L | 288.2030 | 144.6051 | 271.1765 | 136.0919 |          |          | 2 |
| 26 |           |           |           |           |           |           | R | 175.1190 | 88.0631  | 158.0924 | 79.5498  |          |          | 1 |

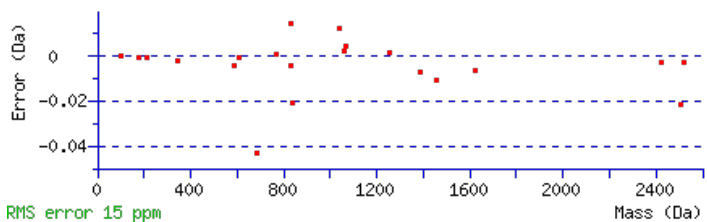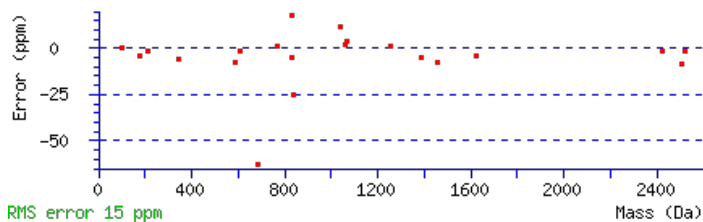

NCBI BLAST search of [TLPNGRDALDGPAAEAEPEHSFDGLR](#)  
 (Parameters: blastp, nr protein database, expect=20000, no filter, PAM30)  
 Other BLAST [web gateways](#)

All matches to this query

| Score | Mr(calc)  | Delta   | Sequence                                   |
|-------|-----------|---------|--------------------------------------------|
| 55.6  | 2735.2787 | -0.0002 | <a href="#">TLPNGRDALDGPAAEAEPEHSFDGLR</a> |
| 0.1   | 2733.2599 | 2.0186  | <a href="#">VSGGQAHEDLLNESIKACQRGFCR</a>   |

Mascot: <http://www.matrixscience.com/>

# Mascot Search Results

## Peptide View

MS/MS Fragmentation of **TLPNGRDALDGPAAEAPEHSFDGLR**

Found in **Q15149** in **uni\_human\_nr**, PLEC\_HUMAN Plectin OS=Homo sapiens GN=PLEC PE=1 SV=3

Match to Query 12788: 2734.295856 from(684.581240,4+) intensity(350750.9375) rtinseconds(2111) scans(11896) index(8681)

Title: 130806\_HPL\_Human\_Plaque\_BR1\_TR2\_08\_Spectrum030373\_scans\_\_11896\_RTINSECONDS=2111

Data file E:\\RAW\\HumanPlaques\\imgf\\T\\1D\\T130806\_HPL\_Human\_Plaque\_BR1\_TR2\_08.mgf

Click mouse within plot area to zoom in by factor of two about that point

Or,  to  Da

Label all possible matches  Label matches used for scoring

Show Y-axis

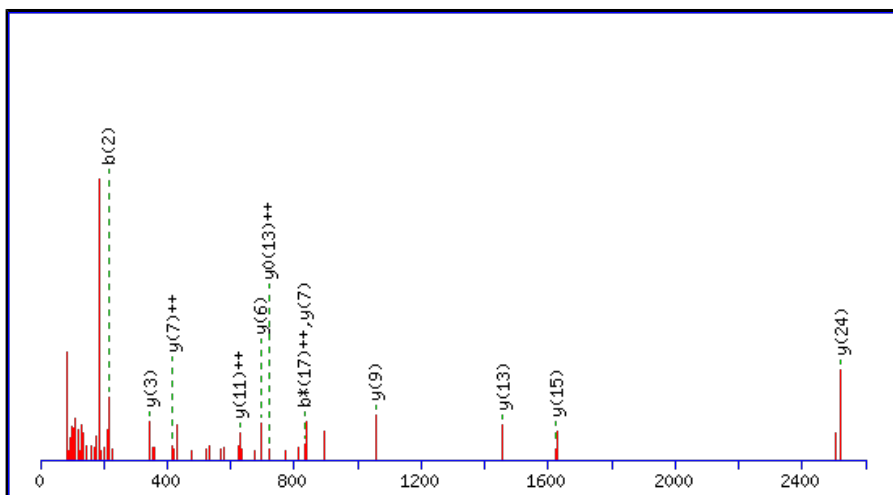

Monoisotopic mass of neutral peptide **Mr(calc): 2734.2947**

Fixed modifications: Carbamidomethyl (C) (apply to specified residues or termini only)

Ions Score: 30 Expect: 0.082

Matches : 12/288 fragment ions using 24 most intense peaks ([help](#))

| #  | b               | b <sup>++</sup> | b*        | b <sup>*++</sup> | b <sup>0</sup> | b <sup>0++</sup> | Seq. | y                | y <sup>++</sup> | y*        | y <sup>*++</sup> | y <sup>0</sup> | y <sup>0++</sup> | #  |
|----|-----------------|-----------------|-----------|------------------|----------------|------------------|------|------------------|-----------------|-----------|------------------|----------------|------------------|----|
| 1  | 102.0550        | 51.5311         |           |                  | 84.0444        | 42.5258          | T    |                  |                 |           |                  |                |                  | 26 |
| 2  | <b>215.1390</b> | 108.0731        |           |                  | 197.1285       | 99.0679          | L    | 2634.2543        | 1317.6308       | 2617.2277 | 1309.1175        | 2616.2437      | 1308.6255        | 25 |
| 3  | 312.1918        | 156.5995        |           |                  | 294.1812       | 147.5942         | P    | <b>2521.1702</b> | 1261.0887       | 2504.1437 | 1252.5755        | 2503.1597      | 1252.0835        | 24 |
| 4  | 426.2347        | 213.6210        | 409.2082  | 205.1077         | 408.2241       | 204.6157         | N    | 2424.1175        | 1212.5624       | 2407.0909 | 1204.0491        | 2406.1069      | 1203.5571        | 23 |
| 5  | 483.2562        | 242.1317        | 466.2296  | 233.6185         | 465.2456       | 233.1264         | G    | 2310.0745        | 1155.5409       | 2293.0480 | 1147.0276        | 2292.0640      | 1146.5356        | 22 |
| 6  | 639.3573        | 320.1823        | 622.3307  | 311.6690         | 621.3467       | 311.1770         | R    | 2253.0531        | 1127.0302       | 2236.0265 | 1118.5169        | 2235.0425      | 1118.0249        | 21 |
| 7  | 754.3842        | 377.6958        | 737.3577  | 369.1825         | 736.3737       | 368.6905         | D    | 2096.9520        | 1048.9796       | 2079.9254 | 1040.4663        | 2078.9414      | 1039.9743        | 20 |
| 8  | 825.4213        | 413.2143        | 808.3948  | 404.7010         | 807.4108       | 404.2090         | A    | 1981.9250        | 991.4661        | 1964.8985 | 982.9529         | 1963.9144      | 982.4609         | 19 |
| 9  | 938.5054        | 469.7563        | 921.4789  | 461.2431         | 920.4948       | 460.7511         | L    | 1910.8879        | 955.9476        | 1893.8613 | 947.4343         | 1892.8773      | 946.9423         | 18 |
| 10 | 1053.5323       | 527.2698        | 1036.5058 | 518.7565         | 1035.5218      | 518.2645         | D    | 1797.8038        | 899.4056        | 1780.7773 | 890.8923         | 1779.7933      | 890.4003         | 17 |
| 11 | 1110.5538       | 555.7805        | 1093.5273 | 547.2673         | 1092.5432      | 546.7753         | G    | 1682.7769        | 841.8921        | 1665.7503 | 833.3788         | 1664.7663      | 832.8868         | 16 |
| 12 | 1207.6066       | 604.3069        | 1190.5800 | 595.7937         | 1189.5960      | 595.3016         | P    | <b>1625.7554</b> | 813.3814        | 1608.7289 | 804.8681         | 1607.7449      | 804.3761         | 15 |
| 13 | 1278.6437       | 639.8255        | 1261.6171 | 631.3122         | 1260.6331      | 630.8202         | A    | 1528.7027        | 764.8550        | 1511.6761 | 756.3417         | 1510.6921      | 755.8497         | 14 |
| 14 | 1349.6808       | 675.3440        | 1332.6543 | 666.8308         | 1331.6702      | 666.3388         | A    | <b>1457.6655</b> | 729.3364        | 1440.6390 | 720.8231         | 1439.6550      | <b>720.3311</b>  | 13 |
| 15 | 1478.7234       | 739.8653        | 1461.6968 | 731.3521         | 1460.7128      | 730.8601         | E    | 1386.6284        | 693.8179        | 1369.6019 | 685.3046         | 1368.6179      | 684.8126         | 12 |
| 16 | 1549.7605       | 775.3839        | 1532.7340 | 766.8706         | 1531.7499      | 766.3786         | A    | 1257.5858        | <b>629.2966</b> | 1240.5593 | 620.7833         | 1239.5753      | 620.2913         | 11 |
| 17 | 1678.8031       | 839.9052        | 1661.7766 | <b>831.3919</b>  | 1660.7925      | 830.8999         | E    | 1186.5487        | 593.7780        | 1169.5222 | 585.2647         | 1168.5382      | 584.7727         | 10 |
| 18 | 1775.8559       | 888.4316        | 1758.8293 | 879.9183         | 1757.8453      | 879.4263         | P    | <b>1057.5061</b> | 529.2567        | 1040.4796 | 520.7434         | 1039.4956      | 520.2514         | 9  |
| 19 | 1904.8985       | 952.9529        | 1887.8719 | 944.4396         | 1886.8879      | 943.9476         | E    | 960.4534         | 480.7303        | 943.4268  | 472.2170         | 942.4428       | 471.7250         | 8  |



|    |           |           |           |           |           |           |   |          |          |          |          |          |          |   |
|----|-----------|-----------|-----------|-----------|-----------|-----------|---|----------|----------|----------|----------|----------|----------|---|
| 20 | 2041.9574 | 1021.4823 | 2024.9308 | 1012.9691 | 2023.9468 | 1012.4770 | H | 831.4108 | 416.2090 | 814.3842 | 407.6958 | 813.4002 | 407.2037 | 7 |
| 21 | 2128.9894 | 1064.9983 | 2111.9629 | 1056.4851 | 2110.9788 | 1055.9931 | S | 694.3519 | 347.6796 | 677.3253 | 339.1663 | 676.3413 | 338.6743 | 6 |
| 22 | 2276.0578 | 1138.5325 | 2259.0313 | 1130.0193 | 2258.0473 | 1129.5273 | F | 607.3198 | 304.1636 | 590.2933 | 295.6503 | 589.3093 | 295.1583 | 5 |
| 23 | 2391.0848 | 1196.0460 | 2374.0582 | 1187.5327 | 2373.0742 | 1187.0407 | D | 460.2514 | 230.6293 | 443.2249 | 222.1161 | 442.2409 | 221.6241 | 4 |
| 24 | 2448.1062 | 1224.5567 | 2431.0797 | 1216.0435 | 2430.0957 | 1215.5515 | G | 345.2245 | 173.1159 | 328.1979 | 164.6026 |          |          | 3 |
| 25 | 2561.1903 | 1281.0988 | 2544.1637 | 1272.5855 | 2543.1797 | 1272.0935 | L | 288.2030 | 144.6051 | 271.1765 | 136.0919 |          |          | 2 |
| 26 |           |           |           |           |           |           | R | 175.1190 | 88.0631  | 158.0924 | 79.5498  |          |          | 1 |

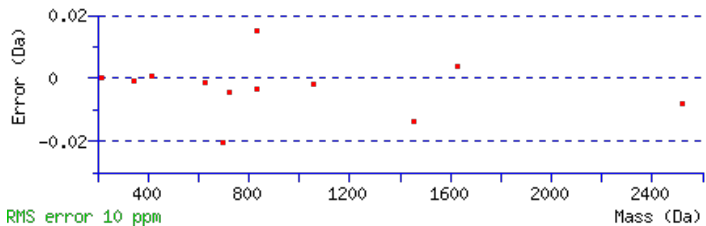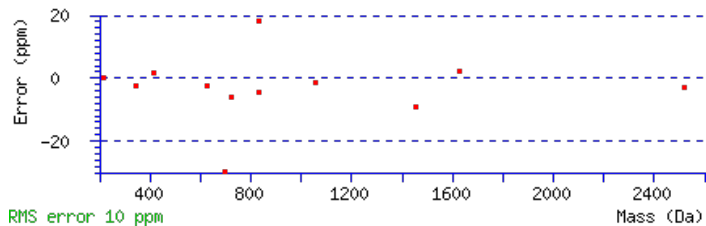

NCBI BLAST search of [TLPNGRDALDGPAAEAPEHSFDGLR](#)  
 (Parameters: blastp, nr protein database, expect=20000, no filter, PAM30)  
 Other BLAST [web gateways](#)

All matches to this query

| Score | Mr(calc)  | Delta  | Sequence                                  |
|-------|-----------|--------|-------------------------------------------|
| 30.1  | 2734.2947 | 0.0012 | <a href="#">TLPNGRDALDGPAAEAPEHSFDGLR</a> |

Mascot: <http://www.matrixscience.com/>

# Mascot Search Results

## Peptide View

MS/MS Fragmentation of **TLPNGRDALDGPAAEAPEHSFDGLRR**

Found in **Q15149** in **uni\_human\_nr**, PLEC\_HUMAN Plectin OS=Homo sapiens GN=PLEC PE=1 SV=3

Match to Query 14558: 2891.380870 from(579.283450,5+) intensity(996279.5625) rtinseconds(2049) scans(11466) index(8505)

Title: 130806\_HPL\_Human\_Plaque\_BR2\_TR2\_07\_Spectrum030181\_scans\_\_11466\_RTINSECONDS=2049

Data file E:\\RAW\\HumanPlaques\\imgf\\T\\1D\\T130806\_HPL\_Human\_Plaque\_BR2\_TR2\_07.mgf

Click mouse within plot area to zoom in by factor of two about that point

Or,  to  Da

Label all possible matches  Label matches used for scoring

Show Y-axis

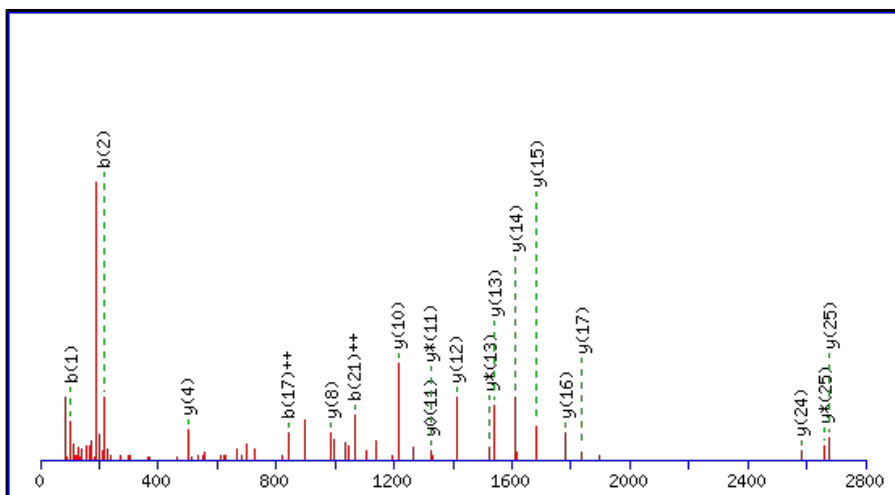

Monoisotopic mass of neutral peptide Mr(calc): 2891.3798

Fixed modifications: Carbamidomethyl (C) (apply to specified residues or termini only)

Variable modifications:

N4 : Deamidated (NQ)

Ions Score: 62 Expect: 5.1e-005

Matches : 19/298 fragment ions using 38 most intense peaks ([help](#))

| #  | b               | b <sup>++</sup> | b <sup>*</sup> | b <sup>*++</sup> | b <sup>0</sup> | b <sup>0++</sup> | Seq. | y                | y <sup>++</sup> | y <sup>*</sup>   | y <sup>*++</sup> | y <sup>0</sup>   | y <sup>0++</sup> | #  |
|----|-----------------|-----------------|----------------|------------------|----------------|------------------|------|------------------|-----------------|------------------|------------------|------------------|------------------|----|
| 1  | <b>102.0550</b> | 51.5311         |                |                  | 84.0444        | 42.5258          | T    |                  |                 |                  |                  |                  |                  | 27 |
| 2  | <b>215.1390</b> | 108.0731        |                |                  | 197.1285       | 99.0679          | L    | 2791.3394        | 1396.1733       | 2774.3129        | 1387.6601        | 2773.3288        | 1387.1681        | 26 |
| 3  | 312.1918        | 156.5995        |                |                  | 294.1812       | 147.5942         | P    | <b>2678.2553</b> | 1339.6313       | <b>2661.2288</b> | 1331.1180        | 2660.2448        | 1330.6260        | 25 |
| 4  | 427.2187        | 214.1130        | 410.1922       | 205.5997         | 409.2082       | 205.1077         | N    | <b>2581.2026</b> | 1291.1049       | 2564.1760        | 1282.5917        | 2563.1920        | 1282.0996        | 24 |
| 5  | 484.2402        | 242.6237        | 467.2136       | 234.1105         | 466.2296       | 233.6185         | G    | 2466.1756        | 1233.5915       | 2449.1491        | 1225.0782        | 2448.1651        | 1224.5862        | 23 |
| 6  | 640.3413        | 320.6743        | 623.3148       | 312.1610         | 622.3307       | 311.6690         | R    | 2409.1542        | 1205.0807       | 2392.1276        | 1196.5675        | 2391.1436        | 1196.0754        | 22 |
| 7  | 755.3682        | 378.1878        | 738.3417       | 369.6745         | 737.3577       | 369.1825         | D    | 2253.0531        | 1127.0302       | 2236.0265        | 1118.5169        | 2235.0425        | 1118.0249        | 21 |
| 8  | 826.4054        | 413.7063        | 809.3788       | 405.1930         | 808.3948       | 404.7010         | A    | 2138.0261        | 1069.5167       | 2120.9996        | 1061.0034        | 2120.0156        | 1060.5114        | 20 |
| 9  | 939.4894        | 470.2483        | 922.4629       | 461.7351         | 921.4789       | 461.2431         | L    | 2066.9890        | 1033.9981       | 2049.9625        | 1025.4849        | 2048.9784        | 1024.9929        | 19 |
| 10 | 1054.5164       | 527.7618        | 1037.4898      | 519.2485         | 1036.5058      | 518.7565         | D    | 1953.9049        | 977.4561        | 1936.8784        | 968.9428         | 1935.8944        | 968.4508         | 18 |
| 11 | 1111.5378       | 556.2726        | 1094.5113      | 547.7593         | 1093.5273      | 547.2673         | G    | <b>1838.8780</b> | 919.9426        | 1821.8515        | 911.4294         | 1820.8674        | 910.9374         | 17 |
| 12 | 1208.5906       | 604.7989        | 1191.5640      | 596.2857         | 1190.5800      | 595.7937         | P    | <b>1781.8565</b> | 891.4319        | 1764.8300        | 882.9186         | 1763.8460        | 882.4266         | 16 |
| 13 | 1279.6277       | 640.3175        | 1262.6012      | 631.8042         | 1261.6171      | 631.3122         | A    | <b>1684.8038</b> | 842.9055        | 1667.7772        | 834.3922         | 1666.7932        | 833.9002         | 15 |
| 14 | 1350.6648       | 675.8360        | 1333.6383      | 667.3228         | 1332.6543      | 666.8308         | A    | <b>1613.7667</b> | 807.3870        | 1596.7401        | 798.8737         | 1595.7561        | 798.3817         | 14 |
| 15 | 1479.7074       | 740.3573        | 1462.6809      | 731.8441         | 1461.6968      | 731.3521         | E    | <b>1542.7295</b> | 771.8684        | <b>1525.7030</b> | 763.3551         | 1524.7190        | 762.8631         | 13 |
| 16 | 1550.7445       | 775.8759        | 1533.7180      | 767.3626         | 1532.7340      | 766.8706         | A    | <b>1413.6870</b> | 707.3471        | 1396.6604        | 698.8338         | 1395.6764        | 698.3418         | 12 |
| 17 | 1679.7871       | <b>840.3972</b> | 1662.7606      | 831.8839         | 1661.7766      | 831.3919         | E    | 1342.6498        | 671.8286        | <b>1325.6233</b> | 663.3153         | <b>1324.6393</b> | 662.8233         | 11 |
| 18 | 1776.8399       | 888.9236        | 1759.8133      | 880.4103         | 1758.8293      | 879.9183         | P    | <b>1213.6072</b> | 607.3073        | 1196.5807        | 598.7940         | 1195.5967        | 598.3020         | 10 |

|    |           |                  |           |           |           |           |   |                 |          |           |          |           |          |   |
|----|-----------|------------------|-----------|-----------|-----------|-----------|---|-----------------|----------|-----------|----------|-----------|----------|---|
| 19 | 1905.8825 | 953.4449         | 1888.8559 | 944.9316  | 1887.8719 | 944.4396  | E | 1116.5545       | 558.7809 | 1099.5279 | 550.2676 | 1098.5439 | 549.7756 | 9 |
| 20 | 2042.9414 | 1021.9743        | 2025.9148 | 1013.4611 | 2024.9308 | 1012.9691 | H | <b>987.5119</b> | 494.2596 | 970.4853  | 485.7463 | 969.5013  | 485.2543 | 8 |
| 21 | 2129.9734 | <b>1065.4903</b> | 2112.9469 | 1056.9771 | 2111.9629 | 1056.4851 | S | 850.4530        | 425.7301 | 833.4264  | 417.2169 | 832.4424  | 416.7248 | 7 |
| 22 | 2277.0418 | 1139.0246        | 2260.0153 | 1130.5113 | 2259.0313 | 1130.0193 | F | 763.4209        | 382.2141 | 746.3944  | 373.7008 | 745.4104  | 373.2088 | 6 |
| 23 | 2392.0688 | 1196.5380        | 2375.0422 | 1188.0248 | 2374.0582 | 1187.5327 | D | 616.3525        | 308.6799 | 599.3260  | 300.1666 | 598.3420  | 299.6746 | 5 |
| 24 | 2449.0902 | 1225.0488        | 2432.0637 | 1216.5355 | 2431.0797 | 1216.0435 | G | <b>501.3256</b> | 251.1664 | 484.2990  | 242.6532 |           |          | 4 |
| 25 | 2562.1743 | 1281.5908        | 2545.1478 | 1273.0775 | 2544.1637 | 1272.5855 | L | 444.3041        | 222.6557 | 427.2776  | 214.1424 |           |          | 3 |
| 26 | 2718.2754 | 1359.6413        | 2701.2489 | 1351.1281 | 2700.2648 | 1350.6361 | R | 331.2201        | 166.1137 | 314.1935  | 157.6004 |           |          | 2 |
| 27 |           |                  |           |           |           |           | R | 175.1190        | 88.0631  | 158.0924  | 79.5498  |           |          | 1 |

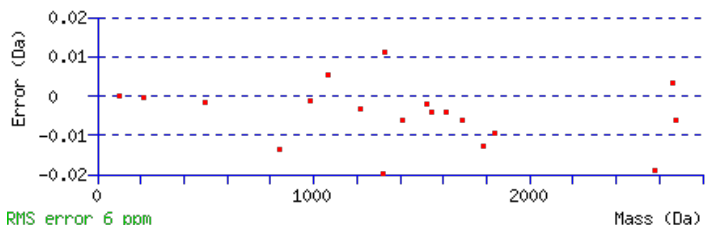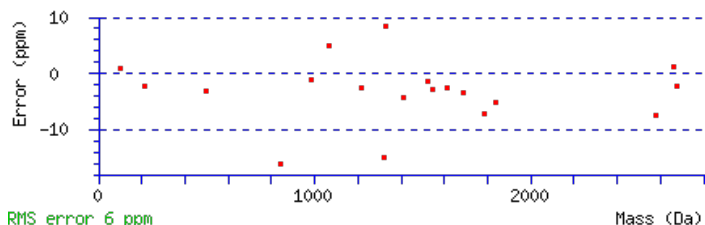

NCBI BLAST search of [TLPNGRDALDGPAAEAPEHSFDGLRR](#)  
 (Parameters: blastp, nr protein database, expect=20000, no filter, PAM30)  
 Other BLAST [web gateways](#)

All matches to this query

| Score | Mr(calc)  | Delta  | Sequence                                   |
|-------|-----------|--------|--------------------------------------------|
| 62.4  | 2891.3798 | 0.0011 | <a href="#">TLPNGRDALDGPAAEAPEHSFDGLRR</a> |

Mascot: <http://www.matrixscience.com/>

# Mascot Search Results

## Peptide View

MS/MS Fragmentation of **TLPNGRDALDGPAAEAPEHSFDGLRR**

Found in **Q15149** in **uni\_human\_nr**, PLEC\_HUMAN Plectin OS=Homo sapiens GN=PLEC PE=1 SV=3

Match to Query 14184: 2891.380056 from(723.852290,4+) intensity(537516.7500) rtinseconds(2028) scans(11319) index(8233)

Title: 130801\_HPL\_Human\_Plaque\_BR1\_TR1\_07\_Spectrum029936\_scans\_\_11319\_RTINSECONDS=2028

Data file E:\\RAW\\HumanPlaques\\imgf\\T\\1D\\T130801\_HPL\_Human\_Plaque\_BR1\_TR1\_07.mgf

Click mouse within plot area to zoom in by factor of two about that point

Or,  to  Da  
 Label all possible matches  Label matches used for scoring  
 Show Y-axis

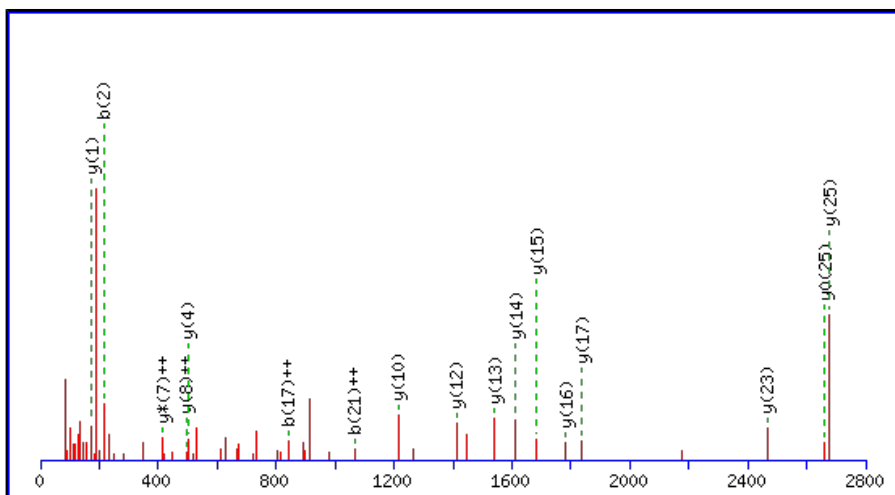

Monoisotopic mass of neutral peptide Mr(calc): 2891.3798

Fixed modifications: Carbamidomethyl (C) (apply to specified residues or termini only)

Variable modifications:

N4 : Deamidated (NQ)

Ions Score: 51 Expect: 0.00073

Matches : 17/298 fragment ions using 39 most intense peaks ([help](#))

| #  | b               | b <sup>++</sup> | b <sup>*</sup> | b <sup>*++</sup> | b <sup>0</sup> | b <sup>0++</sup> | Seq. | y                | y <sup>++</sup> | y <sup>*</sup> | y <sup>*++</sup> | y <sup>0</sup>   | y <sup>0++</sup> | #  |
|----|-----------------|-----------------|----------------|------------------|----------------|------------------|------|------------------|-----------------|----------------|------------------|------------------|------------------|----|
| 1  | 102.0550        | 51.5311         |                |                  | 84.0444        | 42.5258          | T    |                  |                 |                |                  |                  |                  | 27 |
| 2  | <b>215.1390</b> | 108.0731        |                |                  | 197.1285       | 99.0679          | L    | 2791.3394        | 1396.1733       | 2774.3129      | 1387.6601        | 2773.3288        | 1387.1681        | 26 |
| 3  | 312.1918        | 156.5995        |                |                  | 294.1812       | 147.5942         | P    | <b>2678.2553</b> | 1339.6313       | 2661.2288      | 1331.1180        | <b>2660.2448</b> | 1330.6260        | 25 |
| 4  | 427.2187        | 214.1130        | 410.1922       | 205.5997         | 409.2082       | 205.1077         | N    | 2581.2026        | 1291.1049       | 2564.1760      | 1282.5917        | 2563.1920        | 1282.0996        | 24 |
| 5  | 484.2402        | 242.6237        | 467.2136       | 234.1105         | 466.2296       | 233.6185         | G    | <b>2466.1756</b> | 1233.5915       | 2449.1491      | 1225.0782        | 2448.1651        | 1224.5862        | 23 |
| 6  | 640.3413        | 320.6743        | 623.3148       | 312.1610         | 622.3307       | 311.6690         | R    | 2409.1542        | 1205.0807       | 2392.1276      | 1196.5675        | 2391.1436        | 1196.0754        | 22 |
| 7  | 755.3682        | 378.1878        | 738.3417       | 369.6745         | 737.3577       | 369.1825         | D    | 2253.0531        | 1127.0302       | 2236.0265      | 1118.5169        | 2235.0425        | 1118.0249        | 21 |
| 8  | 826.4054        | 413.7063        | 809.3788       | 405.1930         | 808.3948       | 404.7010         | A    | 2138.0261        | 1069.5167       | 2120.9996      | 1061.0034        | 2120.0156        | 1060.5114        | 20 |
| 9  | 939.4894        | 470.2483        | 922.4629       | 461.7351         | 921.4789       | 461.2431         | L    | 2066.9890        | 1033.9981       | 2049.9625      | 1025.4849        | 2048.9784        | 1024.9929        | 19 |
| 10 | 1054.5164       | 527.7618        | 1037.4898      | 519.2485         | 1036.5058      | 518.7565         | D    | 1953.9049        | 977.4561        | 1936.8784      | 968.9428         | 1935.8944        | 968.4508         | 18 |
| 11 | 1111.5378       | 556.2726        | 1094.5113      | 547.7593         | 1093.5273      | 547.2673         | G    | <b>1838.8780</b> | 919.9426        | 1821.8515      | 911.4294         | 1820.8674        | 910.9374         | 17 |
| 12 | 1208.5906       | 604.7989        | 1191.5640      | 596.2857         | 1190.5800      | 595.7937         | P    | <b>1781.8565</b> | 891.4319        | 1764.8300      | 882.9186         | 1763.8460        | 882.4266         | 16 |
| 13 | 1279.6277       | 640.3175        | 1262.6012      | 631.8042         | 1261.6171      | 631.3122         | A    | <b>1684.8038</b> | 842.9055        | 1667.7772      | 834.3922         | 1666.7932        | 833.9002         | 15 |
| 14 | 1350.6648       | 675.8360        | 1333.6383      | 667.3228         | 1332.6543      | 666.8308         | A    | <b>1613.7667</b> | 807.3870        | 1596.7401      | 798.8737         | 1595.7561        | 798.3817         | 14 |
| 15 | 1479.7074       | 740.3573        | 1462.6809      | 731.8441         | 1461.6968      | 731.3521         | E    | <b>1542.7295</b> | 771.8684        | 1525.7030      | 763.3551         | 1524.7190        | 762.8631         | 13 |
| 16 | 1550.7445       | 775.8759        | 1533.7180      | 767.3626         | 1532.7340      | 766.8706         | A    | <b>1413.6870</b> | 707.3471        | 1396.6604      | 698.8338         | 1395.6764        | 698.3418         | 12 |
| 17 | 1679.7871       | <b>840.3972</b> | 1662.7606      | 831.8839         | 1661.7766      | 831.3919         | E    | 1342.6498        | 671.8286        | 1325.6233      | 663.3153         | 1324.6393        | 662.8233         | 11 |
| 18 | 1776.8399       | 888.9236        | 1759.8133      | 880.4103         | 1758.8293      | 879.9183         | P    | <b>1213.6072</b> | 607.3073        | 1196.5807      | 598.7940         | 1195.5967        | 598.3020         | 10 |

|    |           |           |           |           |           |           |   |           |          |           |          |           |          |   |
|----|-----------|-----------|-----------|-----------|-----------|-----------|---|-----------|----------|-----------|----------|-----------|----------|---|
| 19 | 1905.8825 | 953.4449  | 1888.8559 | 944.9316  | 1887.8719 | 944.4396  | E | 1116.5545 | 558.7809 | 1099.5279 | 550.2676 | 1098.5439 | 549.7756 | 9 |
| 20 | 2042.9414 | 1021.9743 | 2025.9148 | 1013.4611 | 2024.9308 | 1012.9691 | H | 987.5119  | 494.2596 | 970.4853  | 485.7463 | 969.5013  | 485.2543 | 8 |
| 21 | 2129.9734 | 1065.4903 | 2112.9469 | 1056.9771 | 2111.9629 | 1056.4851 | S | 850.4530  | 425.7301 | 833.4264  | 417.2169 | 832.4424  | 416.7248 | 7 |
| 22 | 2277.0418 | 1139.0246 | 2260.0153 | 1130.5113 | 2259.0313 | 1130.0193 | F | 763.4209  | 382.2141 | 746.3944  | 373.7008 | 745.4104  | 373.2088 | 6 |
| 23 | 2392.0688 | 1196.5380 | 2375.0422 | 1188.0248 | 2374.0582 | 1187.5327 | D | 616.3525  | 308.6799 | 599.3260  | 300.1666 | 598.3420  | 299.6746 | 5 |
| 24 | 2449.0902 | 1225.0488 | 2432.0637 | 1216.5355 | 2431.0797 | 1216.0435 | G | 501.3256  | 251.1664 | 484.2990  | 242.6532 |           |          | 4 |
| 25 | 2562.1743 | 1281.5908 | 2545.1478 | 1273.0775 | 2544.1637 | 1272.5855 | L | 444.3041  | 222.6557 | 427.2776  | 214.1424 |           |          | 3 |
| 26 | 2718.2754 | 1359.6413 | 2701.2489 | 1351.1281 | 2700.2648 | 1350.6361 | R | 331.2201  | 166.1137 | 314.1935  | 157.6004 |           |          | 2 |
| 27 |           |           |           |           |           |           | R | 175.1190  | 88.0631  | 158.0924  | 79.5498  |           |          | 1 |

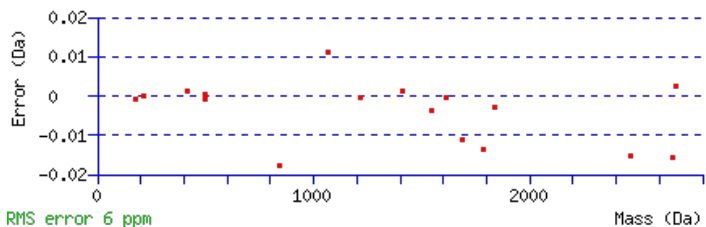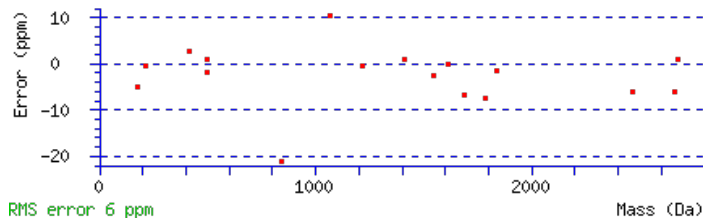

NCBI BLAST search of [TLPNGRDALDGPAAEAPEHSFDGLRR](#)  
 (Parameters: blastp, nr protein database, expect=20000, no filter, PAM30)  
 Other BLAST [web gateways](#)

All matches to this query

| Score | Mr(calc)  | Delta  | Sequence                                    |
|-------|-----------|--------|---------------------------------------------|
| 50.9  | 2891.3798 | 0.0003 | <a href="#">TLPNGRDALDGPAAEAPEHSFDGLRR</a>  |
| 0.3   | 2891.3771 | 0.0030 | <a href="#">KGILENQGGKGQNTLSSDVQTNEDILK</a> |

Mascot: <http://www.matrixscience.com/>

# Mascot Search Results

## Peptide View

MS/MS Fragmentation of **GCVVTSVESNSNGR**

Found in **P08567** in **uni\_human\_nr**, PLEK\_HUMAN Pleckstrin OS=Homo sapiens GN=PLEK PE=1 SV=3

Match to Query 2811: 1465.650008 from(733.832280,2+) intensity(106508.4609) rtinseconds(1170) scans(4976) index(2857)

Title: 130809\_HPL\_Human\_Plaque\_BR1\_TR3\_16\_Spectrum022829\_scans\_4976\_RTINSECONDS=1170

Data file E:\RAW\HumanPlaques\mgf\T\1D\T130809\_HPL\_Human\_Plaque\_BR1\_TR3\_16.mgf

Click mouse within plot area to zoom in by factor of two about that point

Or,  to  Da

Label all possible matches  Label matches used for scoring

Show Y-axis

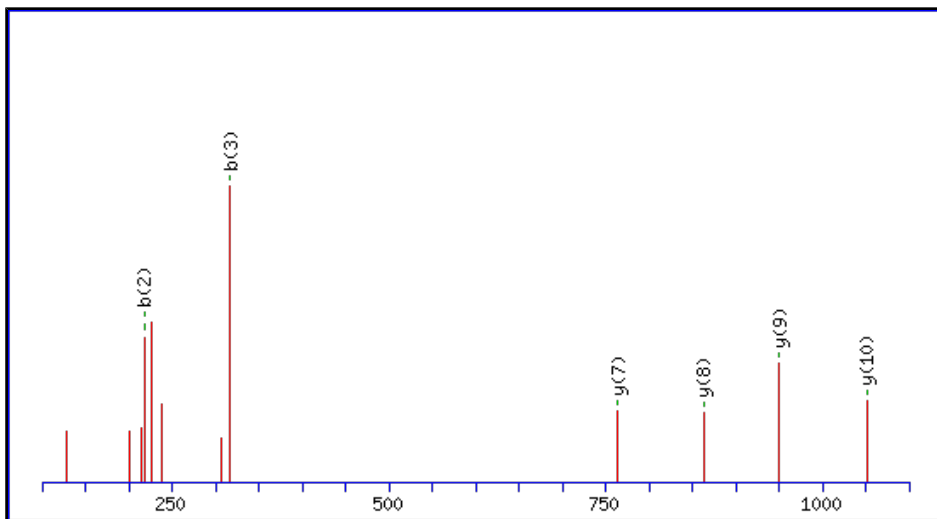

Monoisotopic mass of neutral peptide **Mr(calc)**: 1465.6467

**Fixed modifications:** Carbamidomethyl (C) (apply to specified residues or termini only)

**Variable modifications:**

N12 : Deamidated (NQ)

**Ions Score:** 31 **Expect:** 0.031

**Matches :** 6/124 fragment ions using 8 most intense peaks ([help](#))

| #  | b               | b <sup>++</sup> | b <sup>*</sup> | b <sup>*++</sup> | b <sup>0</sup> | b <sup>0++</sup> | Seq. | y                | y <sup>++</sup> | y <sup>*</sup> | y <sup>*++</sup> | y <sup>0</sup> | y <sup>0++</sup> | #  |
|----|-----------------|-----------------|----------------|------------------|----------------|------------------|------|------------------|-----------------|----------------|------------------|----------------|------------------|----|
| 1  | 58.0287         | 29.5180         |                |                  |                |                  | G    |                  |                 |                |                  |                |                  | 14 |
| 2  | <b>218.0594</b> | 109.5333        |                |                  |                |                  | C    | 1409.6325        | 705.3199        | 1392.6060      | 696.8066         | 1391.6220      | 696.3146         | 13 |
| 3  | <b>317.1278</b> | 159.0675        |                |                  |                |                  | V    | 1249.6019        | 625.3046        | 1232.5753      | 616.7913         | 1231.5913      | 616.2993         | 12 |
| 4  | 416.1962        | 208.6017        |                |                  |                |                  | V    | 1150.5335        | 575.7704        | 1133.5069      | 567.2571         | 1132.5229      | 566.7651         | 11 |
| 5  | 517.2439        | 259.1256        |                |                  | 499.2333       | 250.1203         | T    | <b>1051.4651</b> | 526.2362        | 1034.4385      | 517.7229         | 1033.4545      | 517.2309         | 10 |
| 6  | 604.2759        | 302.6416        |                |                  | 586.2654       | 293.6363         | S    | <b>950.4174</b>  | 475.7123        | 933.3908       | 467.1991         | 932.4068       | 466.7070         | 9  |
| 7  | 703.3443        | 352.1758        |                |                  | 685.3338       | 343.1705         | V    | <b>863.3853</b>  | 432.1963        | 846.3588       | 423.6830         | 845.3748       | 423.1910         | 8  |
| 8  | 832.3869        | 416.6971        |                |                  | 814.3764       | 407.6918         | E    | <b>764.3169</b>  | 382.6621        | 747.2904       | 374.1488         | 746.3064       | 373.6568         | 7  |
| 9  | 919.4190        | 460.2131        |                |                  | 901.4084       | 451.2078         | S    | 635.2743         | 318.1408        | 618.2478       | 309.6275         | 617.2638       | 309.1355         | 6  |
| 10 | 1033.4619       | 517.2346        | 1016.4353      | 508.7213         | 1015.4513      | 508.2293         | N    | 548.2423         | 274.6248        | 531.2158       | 266.1115         | 530.2317       | 265.6195         | 5  |
| 11 | 1120.4939       | 560.7506        | 1103.4674      | 552.2373         | 1102.4833      | 551.7453         | S    | 434.1994         | 217.6033        | 417.1728       | 209.0901         | 416.1888       | 208.5980         | 4  |
| 12 | 1235.5209       | 618.2641        | 1218.4943      | 609.7508         | 1217.5103      | 609.2588         | N    | 347.1674         | 174.0873        | 330.1408       | 165.5740         |                |                  | 3  |
| 13 | 1292.5423       | 646.7748        | 1275.5158      | 638.2615         | 1274.5318      | 637.7695         | G    | 232.1404         | 116.5738        | 215.1139       | 108.0606         |                |                  | 2  |
| 14 |                 |                 |                |                  |                |                  | R    | 175.1190         | 88.0631         | 158.0924       | 79.5498          |                |                  | 1  |

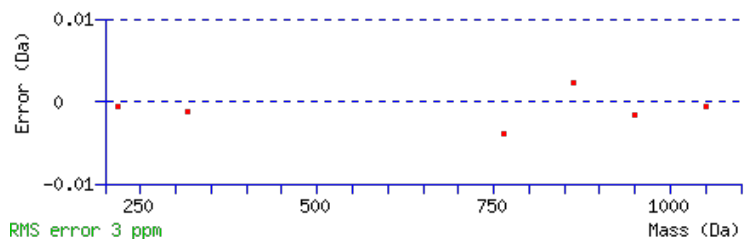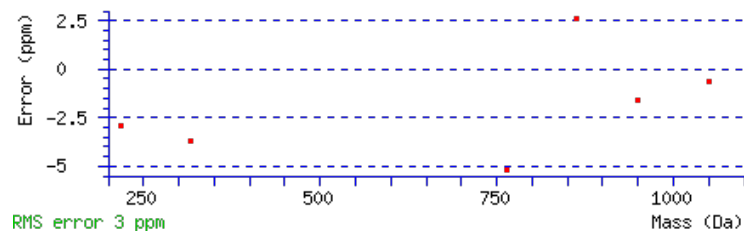

NCBI BLAST search of [GCVVTSVESNSNGR](#)

(Parameters: blastp, nr protein database, expect=20000, no filter, PAM30)

Other BLAST [web gateways](#)

**All matches to this query**

| Score | Mr(calc)  | Delta  | Sequence                       | Site Analysis         |
|-------|-----------|--------|--------------------------------|-----------------------|
| 30.6  | 1465.6467 | 0.0033 | <a href="#">GCVVTSVESNSNGR</a> | Deamidated N12 50.00% |
| 30.6  | 1465.6467 | 0.0033 | <a href="#">GCVVTSVESNSNGR</a> | Deamidated N10 50.00% |

Mascot: <http://www.matrixscience.com/>

# Mascot Search Results

## Peptide View

MS/MS Fragmentation of **GCVVTSVESNSNGR**

Found in **P08567** in **uni\_human\_nr**, PLEK\_HUMAN Pleckstrin OS=Homo sapiens GN=PLEK PE=1 SV=3

Match to Query 3691: 1464.664648 from(733.339600,2+) intensity(897571.6875) rtinseconds(1066) scans(4722) index(2914)

Title: 130806\_HPL\_Human\_Plaque\_BR2\_TR2\_04\_Spectrum025927\_scans\_4722\_RTINSECONDS=1066

Data file E:\RAW\HumanPlaques\mgf\T\1D\T130806\_HPL\_Human\_Plaque\_BR2\_TR2\_04.mgf

Click mouse within plot area to zoom in by factor of two about that point

Or,  to  Da

Label all possible matches  Label matches used for scoring

Show Y-axis

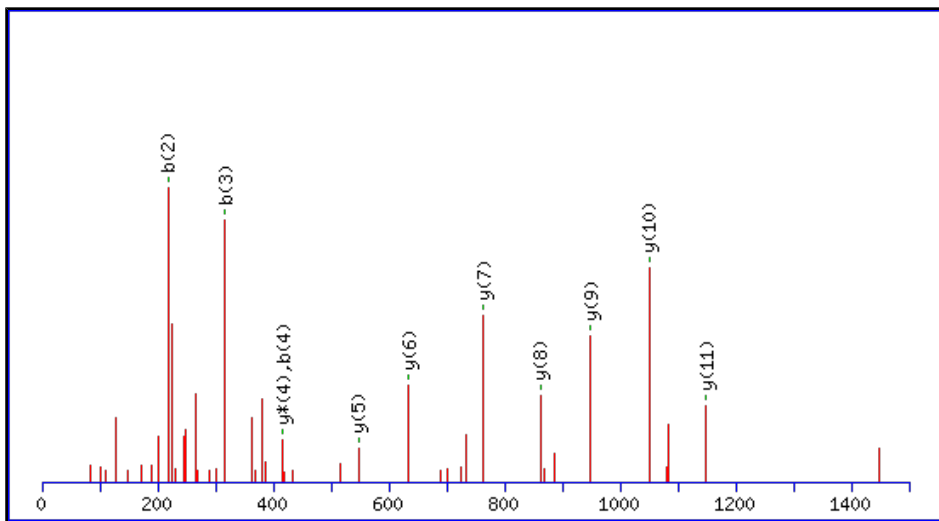

**Monoisotopic mass of neutral peptide Mr(calc):** 1464.6627

**Fixed modifications:** Carbamidomethyl (C) (apply to specified residues or termini only)

**Ions Score:** 66 **Expect:** 1e-005

**Matches :** 11/124 fragment ions using 12 most intense peaks ([help](#))

| #  | b               | b <sup>++</sup> | b <sup>*</sup> | b <sup>*++</sup> | b <sup>0</sup> | b <sup>0++</sup> | Seq. | y                | y <sup>++</sup> | y <sup>*</sup>  | y <sup>*++</sup> | y <sup>0</sup> | y <sup>0++</sup> | #  |
|----|-----------------|-----------------|----------------|------------------|----------------|------------------|------|------------------|-----------------|-----------------|------------------|----------------|------------------|----|
| 1  | 58.0287         | 29.5180         |                |                  |                |                  | G    |                  |                 |                 |                  |                |                  | 14 |
| 2  | <b>218.0594</b> | 109.5333        |                |                  |                |                  | C    | 1408.6485        | 704.8279        | 1391.6220       | 696.3146         | 1390.6380      | 695.8226         | 13 |
| 3  | <b>317.1278</b> | 159.0675        |                |                  |                |                  | V    | 1248.6179        | 624.8126        | 1231.5913       | 616.2993         | 1230.6073      | 615.8073         | 12 |
| 4  | <b>416.1962</b> | 208.6017        |                |                  |                |                  | V    | <b>1149.5495</b> | 575.2784        | 1132.5229       | 566.7651         | 1131.5389      | 566.2731         | 11 |
| 5  | 517.2439        | 259.1256        |                |                  | 499.2333       | 250.1203         | T    | <b>1050.4810</b> | 525.7442        | 1033.4545       | 517.2309         | 1032.4705      | 516.7389         | 10 |
| 6  | 604.2759        | 302.6416        |                |                  | 586.2654       | 293.6363         | S    | <b>949.4334</b>  | 475.2203        | 932.4068        | 466.7070         | 931.4228       | 466.2150         | 9  |
| 7  | 703.3443        | 352.1758        |                |                  | 685.3338       | 343.1705         | V    | <b>862.4013</b>  | 431.7043        | 845.3748        | 423.1910         | 844.3908       | 422.6990         | 8  |
| 8  | 832.3869        | 416.6971        |                |                  | 814.3764       | 407.6918         | E    | <b>763.3329</b>  | 382.1701        | 746.3064        | 373.6568         | 745.3224       | 373.1648         | 7  |
| 9  | 919.4190        | 460.2131        |                |                  | 901.4084       | 451.2078         | S    | <b>634.2903</b>  | 317.6488        | 617.2638        | 309.1355         | 616.2798       | 308.6435         | 6  |
| 10 | 1033.4619       | 517.2346        | 1016.4353      | 508.7213         | 1015.4513      | 508.2293         | N    | <b>547.2583</b>  | 274.1328        | 530.2317        | 265.6195         | 529.2477       | 265.1275         | 5  |
| 11 | 1120.4939       | 560.7506        | 1103.4674      | 552.2373         | 1102.4833      | 551.7453         | S    | 433.2154         | 217.1113        | <b>416.1888</b> | 208.5980         | 415.2048       | 208.1060         | 4  |
| 12 | 1234.5368       | 617.7721        | 1217.5103      | 609.2588         | 1216.5263      | 608.7668         | N    | 346.1833         | 173.5953        | 329.1568        | 165.0820         |                |                  | 3  |
| 13 | 1291.5583       | 646.2828        | 1274.5318      | 637.7695         | 1273.5477      | 637.2775         | G    | 232.1404         | 116.5738        | 215.1139        | 108.0606         |                |                  | 2  |
| 14 |                 |                 |                |                  |                |                  | R    | 175.1190         | 88.0631         | 158.0924        | 79.5498          |                |                  | 1  |



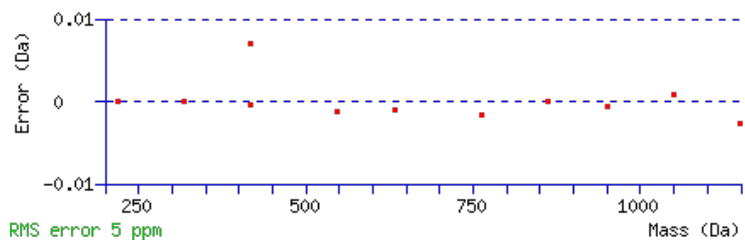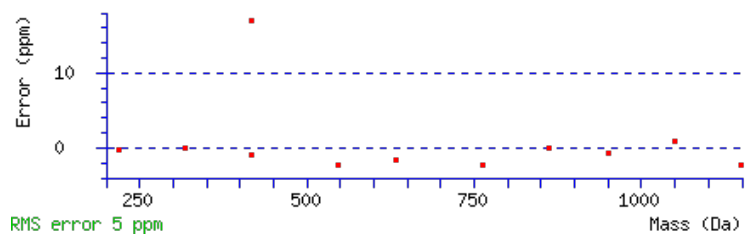

NCBI BLAST search of [GCVVTSVESNSNGR](#)

(Parameters: blastp, nr protein database, expect=20000, no filter, PAM30)

Other BLAST [web gateways](#)

**All matches to this query**

| Score | Mr(calc)  | Delta  | Sequence                       |
|-------|-----------|--------|--------------------------------|
| 66.2  | 1464.6627 | 0.0019 | <a href="#">GCVVTSVESNSNGR</a> |
| 3.0   | 1463.6675 | 0.9972 | <a href="#">DSLETGVGDQCRK</a>  |
| 3.0   | 1463.6674 | 0.9972 | <a href="#">NSLETGVGDQCRK</a>  |
| 1.2   | 1462.6609 | 2.0037 | <a href="#">KDENEKVDGMNAPK</a> |

Mascot: <http://www.matrixscience.com/>

# Mascot Search Results

## Peptide View

MS/MS Fragmentation of **GCVVTSVESNSNGRK**

Found in **P08567** in **uni\_human\_nr**, PLEK\_HUMAN Pleckstrin OS=Homo sapiens GN=PLEK PE=1 SV=3

Match to Query 4548: 1594.725912 from(532.582580,3+) intensity(115125.6719) rtinseconds(972) scans(3748) index(1853)

Title: 130809\_HPL\_Human\_Plaque\_BR2\_TR3\_15\_Spectrum022008\_scans\_3748\_RTINSECONDS=972

Data file E:\RAW\HumanPlaques\mgf\T\1D\T130809\_HPL\_Human\_Plaque\_BR2\_TR3\_15.mgf

Click mouse within plot area to zoom in by factor of two about that point

Or,  to  Da

Label all possible matches  Label matches used for scoring

Show Y-axis

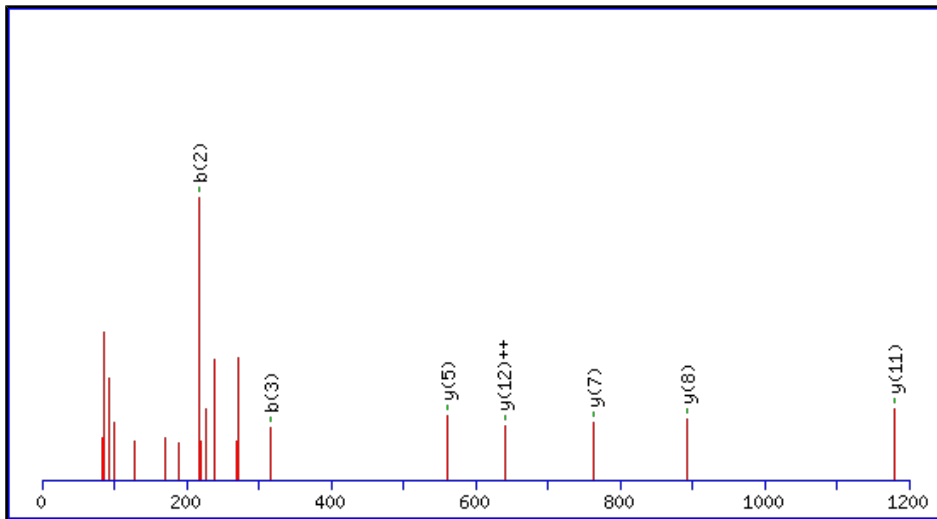

Monoisotopic mass of neutral peptide **Mr(calc)**: 1594.7257

**Fixed modifications:** Carbamidomethyl (C) (apply to specified residues or termini only)

**Variable modifications:**

N10 : Deamidated (NQ)

N12 : Deamidated (NQ)

**Ions Score:** 32 **Expect:** 0.034

**Matches :** 7/134 fragment ions using 8 most intense peaks ([help](#))

| #  | b               | b <sup>++</sup> | b <sup>*</sup> | b <sup>*++</sup> | b <sup>0</sup> | b <sup>0++</sup> | Seq. | y                | y <sup>++</sup> | y <sup>*</sup> | y <sup>*++</sup> | y <sup>0</sup> | y <sup>0++</sup> | #  |
|----|-----------------|-----------------|----------------|------------------|----------------|------------------|------|------------------|-----------------|----------------|------------------|----------------|------------------|----|
| 1  | 58.0287         | 29.5180         |                |                  |                |                  | G    |                  |                 |                |                  |                |                  | 15 |
| 2  | <b>218.0594</b> | 109.5333        |                |                  |                |                  | C    | 1538.7115        | 769.8594        | 1521.6850      | 761.3461         | 1520.7009      | 760.8541         | 14 |
| 3  | <b>317.1278</b> | 159.0675        |                |                  |                |                  | V    | 1378.6809        | 689.8441        | 1361.6543      | 681.3308         | 1360.6703      | 680.8388         | 13 |
| 4  | 416.1962        | 208.6017        |                |                  |                |                  | V    | 1279.6124        | <b>640.3099</b> | 1262.5859      | 631.7966         | 1261.6019      | 631.3046         | 12 |
| 5  | 517.2439        | 259.1256        |                |                  | 499.2333       | 250.1203         | T    | <b>1180.5440</b> | 590.7757        | 1163.5175      | 582.2624         | 1162.5335      | 581.7704         | 11 |
| 6  | 604.2759        | 302.6416        |                |                  | 586.2654       | 293.6363         | S    | 1079.4964        | 540.2518        | 1062.4698      | 531.7385         | 1061.4858      | 531.2465         | 10 |
| 7  | 703.3443        | 352.1758        |                |                  | 685.3338       | 343.1705         | V    | 992.4643         | 496.7358        | 975.4378       | 488.2225         | 974.4538       | 487.7305         | 9  |
| 8  | 832.3869        | 416.6971        |                |                  | 814.3764       | 407.6918         | E    | <b>893.3959</b>  | 447.2016        | 876.3694       | 438.6883         | 875.3853       | 438.1963         | 8  |
| 9  | 919.4190        | 460.2131        |                |                  | 901.4084       | 451.2078         | S    | <b>764.3533</b>  | 382.6803        | 747.3268       | 374.1670         | 746.3428       | 373.6750         | 7  |
| 10 | 1034.4459       | 517.7266        | 1017.4194      | 509.2133         | 1016.4353      | 508.7213         | N    | 677.3213         | 339.1643        | 660.2947       | 330.6510         | 659.3107       | 330.1590         | 6  |
| 11 | 1121.4779       | 561.2426        | 1104.4514      | 552.7293         | 1103.4674      | 552.2373         | S    | <b>562.2944</b>  | 281.6508        | 545.2678       | 273.1375         | 544.2838       | 272.6455         | 5  |
| 12 | 1236.5049       | 618.7561        | 1219.4783      | 610.2428         | 1218.4943      | 609.7508         | N    | 475.2623         | 238.1348        | 458.2358       | 229.6215         |                |                  | 4  |
| 13 | 1293.5263       | 647.2668        | 1276.4998      | 638.7535         | 1275.5158      | 638.2615         | G    | 360.2354         | 180.6213        | 343.2088       | 172.1081         |                |                  | 3  |
| 14 | 1449.6274       | 725.3174        | 1432.6009      | 716.8041         | 1431.6169      | 716.3121         | R    | 303.2139         | 152.1106        | 286.1874       | 143.5973         |                |                  | 2  |
| 15 |                 |                 |                |                  |                |                  | K    | 147.1128         | 74.0600         | 130.0863       | 65.5468          |                |                  | 1  |

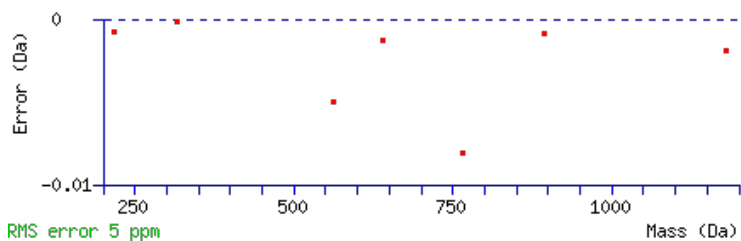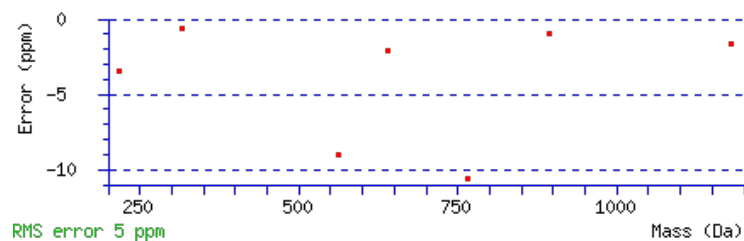

NCBI **BLAST** search of [GCVVTSVESNSNGRK](#)

(Parameters: blastp, nr protein database, expect=20000, no filter, PAM30)

Other BLAST [web gateways](#)

**All matches to this query**

| Score | Mr(calc)  | Delta  | Sequence                        |
|-------|-----------|--------|---------------------------------|
| 31.7  | 1594.7257 | 0.0002 | <a href="#">GCVVTSVESNSNGRK</a> |

Mascot: <http://www.matrixscience.com/>

# Mascot Search Results

## Peptide View

MS/MS Fragmentation of **GCVVTSVESNSNGRK**

Found in **P08567** in **uni\_human\_nr**, PLEK\_HUMAN Pleckstrin OS=Homo sapiens GN=PLEK PE=1 SV=3

Match to Query 4661: 1593.733842 from(532.251890,3+) intensity(147656.5000) rtinseconds(943) scans(3695) index(1943)

Title: 130806\_HPL\_Human\_Plaque\_BR2\_TR2\_06\_Spectrum023748\_scans\_3695\_RTINSECONDS=943

Data file E:\RAW\HumanPlaques\mgf\T\1D\T130806\_HPL\_Human\_Plaque\_BR2\_TR2\_06.mgf

Click mouse within plot area to zoom in by factor of two about that point

Or,  to  Da

Label all possible matches  Label matches used for scoring

Show Y-axis

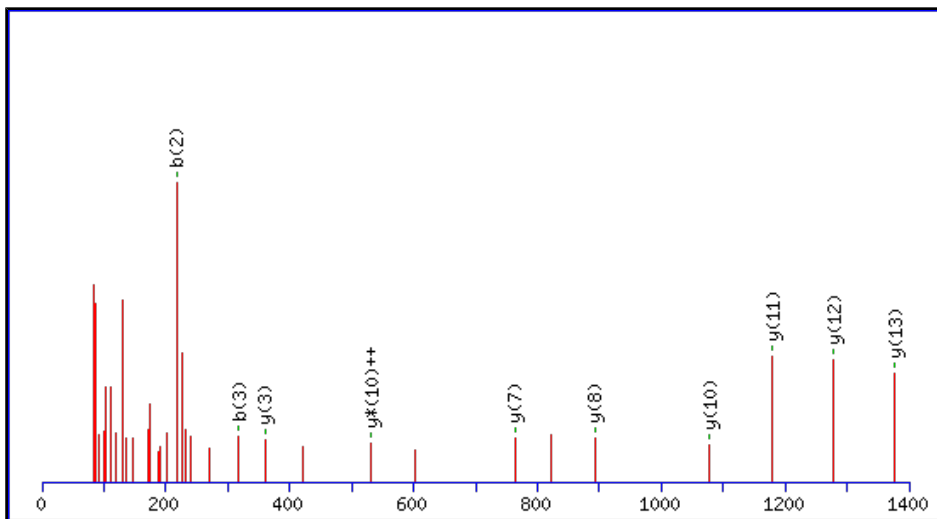

**Monoisotopic mass of neutral peptide Mr(calc):** 1593.7417

**Fixed modifications:** Carbamidomethyl (C) (apply to specified residues or termini only)

**Variable modifications:**

N12 : Deamidated (NQ)

**Ions Score:** 46 **Expect:** 0.0013

**Matches :** 10/134 fragment ions using 16 most intense peaks ([help](#))

| #  | b               | b <sup>++</sup> | b <sup>*</sup> | b <sup>*++</sup> | b <sup>0</sup> | b <sup>0++</sup> | Seq. | y                | y <sup>++</sup> | y <sup>*</sup> | y <sup>*++</sup> | y <sup>0</sup> | y <sup>0++</sup> | #  |
|----|-----------------|-----------------|----------------|------------------|----------------|------------------|------|------------------|-----------------|----------------|------------------|----------------|------------------|----|
| 1  | 58.0287         | 29.5180         |                |                  |                |                  | G    |                  |                 |                |                  |                |                  | 15 |
| 2  | <b>218.0594</b> | 109.5333        |                |                  |                |                  | C    | 1537.7275        | 769.3674        | 1520.7009      | 760.8541         | 1519.7169      | 760.3621         | 14 |
| 3  | <b>317.1278</b> | 159.0675        |                |                  |                |                  | V    | <b>1377.6968</b> | 689.3521        | 1360.6703      | 680.8388         | 1359.6863      | 680.3468         | 13 |
| 4  | 416.1962        | 208.6017        |                |                  |                |                  | V    | <b>1278.6284</b> | 639.8179        | 1261.6019      | 631.3046         | 1260.6179      | 630.8126         | 12 |
| 5  | 517.2439        | 259.1256        |                |                  | 499.2333       | 250.1203         | T    | <b>1179.5600</b> | 590.2836        | 1162.5335      | 581.7704         | 1161.5495      | 581.2784         | 11 |
| 6  | 604.2759        | 302.6416        |                |                  | 586.2654       | 293.6363         | S    | <b>1078.5123</b> | 539.7598        | 1061.4858      | <b>531.2465</b>  | 1060.5018      | 530.7545         | 10 |
| 7  | 703.3443        | 352.1758        |                |                  | 685.3338       | 343.1705         | V    | 991.4803         | 496.2438        | 974.4538       | 487.7305         | 973.4697       | 487.2385         | 9  |
| 8  | 832.3869        | 416.6971        |                |                  | 814.3764       | 407.6918         | E    | <b>892.4119</b>  | 446.7096        | 875.3853       | 438.1963         | 874.4013       | 437.7043         | 8  |
| 9  | 919.4190        | 460.2131        |                |                  | 901.4084       | 451.2078         | S    | <b>763.3693</b>  | 382.1883        | 746.3428       | 373.6750         | 745.3587       | 373.1830         | 7  |
| 10 | 1033.4619       | 517.2346        | 1016.4353      | 508.7213         | 1015.4513      | 508.2293         | N    | 676.3373         | 338.6723        | 659.3107       | 330.1590         | 658.3267       | 329.6670         | 6  |
| 11 | 1120.4939       | 560.7506        | 1103.4674      | 552.2373         | 1102.4833      | 551.7453         | S    | 562.2944         | 281.6508        | 545.2678       | 273.1375         | 544.2838       | 272.6455         | 5  |
| 12 | 1235.5209       | 618.2641        | 1218.4943      | 609.7508         | 1217.5103      | 609.2588         | N    | 475.2623         | 238.1348        | 458.2358       | 229.6215         |                |                  | 4  |
| 13 | 1292.5423       | 646.7748        | 1275.5158      | 638.2615         | 1274.5318      | 637.7695         | G    | <b>360.2354</b>  | 180.6213        | 343.2088       | 172.1081         |                |                  | 3  |
| 14 | 1448.6434       | 724.8254        | 1431.6169      | 716.3121         | 1430.6329      | 715.8201         | R    | 303.2139         | 152.1106        | 286.1874       | 143.5973         |                |                  | 2  |
| 15 |                 |                 |                |                  |                |                  | K    | 147.1128         | 74.0600         | 130.0863       | 65.5468          |                |                  | 1  |

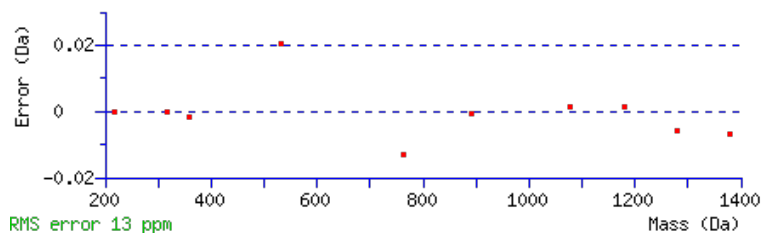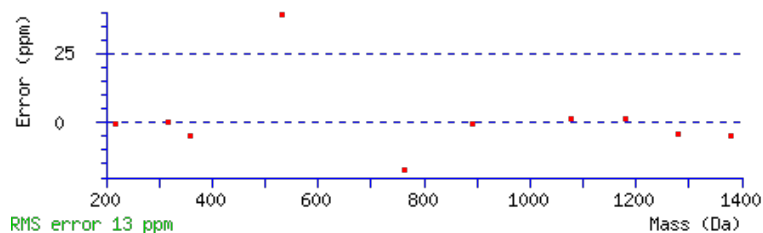

NCBI **BLAST** search of [GCVVTSVESNSNGRK](#)

(Parameters: blastp, nr protein database, expect=20000, no filter, PAM30)

Other BLAST [web gateways](#)

**All matches to this query**

| Score | Mr(calc)  | Delta   | Sequence                        | Site Analysis         |
|-------|-----------|---------|---------------------------------|-----------------------|
| 46.4  | 1593.7417 | -0.0078 | <a href="#">GCVVTSVESNSNGRK</a> | Deamidated N12 50.00% |
| 46.4  | 1593.7417 | -0.0078 | <a href="#">GCVVTSVESNSNGRK</a> | Deamidated N10 50.00% |
| 0.3   | 1592.7351 | 0.9987  | <a href="#">KQEESVQKQAMR</a>    |                       |

Mascot: <http://www.matrixscience.com/>

# Mascot Search Results

## Peptide View

MS/MS Fragmentation of **EAQLPVIENKVCNRYEFLNGR**

Found in **P00747** in **uni\_human\_nr**, PLMN\_HUMAN Plasminogen OS=Homo sapiens GN=PLG PE=1 SV=2

Match to Query 10498: 2551.237256 from(638.816590,4+) intensity(184588.1875) rtinseconds(2439) scans(13237) index(9678)

Title: 130801\_HPL\_Human\_Plaque\_BR2\_TR1\_15\_Spectrum029440\_scans\_\_13237\_RTINSECONDS=2439

Data file E:\\RAW\\HumanPlaques\\imgf\\T\\1D\\T130801\_HPL\_Human\_Plaque\_BR2\_TR1\_15.mgf

Click mouse within plot area to zoom in by factor of two about that point

Or, to Da

Label all possible matches Label matches used for scoring

Show Y-axis

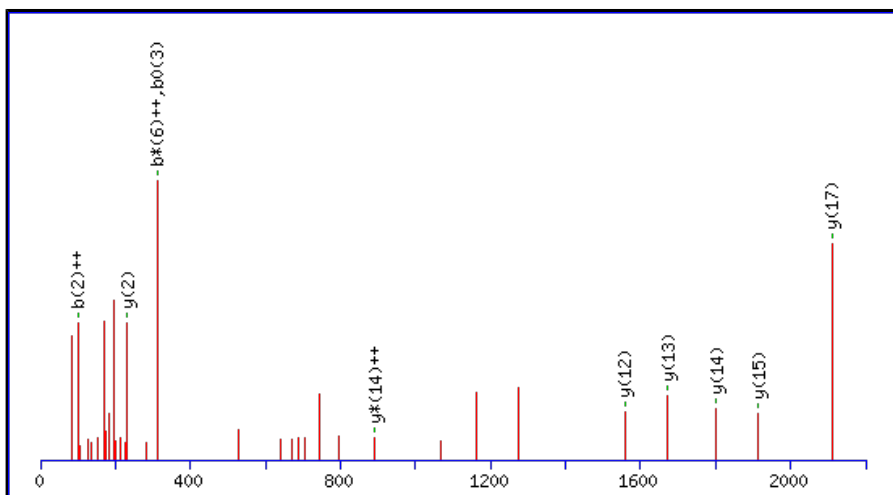

Monoisotopic mass of neutral peptide **Mr(calc)**: 2551.2376

Fixed modifications: Carbamidomethyl (C) (apply to specified residues or termini only)

Variable modifications:

N9 : Deamidated (NQ)

N13 : Deamidated (NQ)

N19 : Deamidated (NQ)

Ions Score: 22 Expect: 0.63

Matches : 10/226 fragment ions using 20 most intense peaks ([help](#))

| #  | b         | b <sup>++</sup> | b <sup>*</sup> | b <sup>***</sup> | b <sup>0</sup>  | b <sup>0++</sup> | Seq. | y                | y <sup>++</sup> | y <sup>*</sup> | y <sup>***</sup> | y <sup>0</sup> | y <sup>0++</sup> | #  |
|----|-----------|-----------------|----------------|------------------|-----------------|------------------|------|------------------|-----------------|----------------|------------------|----------------|------------------|----|
| 1  | 130.0499  | 65.5286         |                |                  | 112.0393        | 56.5233          | E    |                  |                 |                |                  |                |                  | 21 |
| 2  | 201.0870  | <b>101.0471</b> |                |                  | 183.0764        | 92.0418          | A    | 2423.2024        | 1212.1048       | 2406.1758      | 1203.5915        | 2405.1918      | 1203.0995        | 20 |
| 3  | 329.1456  | 165.0764        | 312.1190       | 156.5631         | <b>311.1350</b> | 156.0711         | Q    | 2352.1653        | 1176.5863       | 2335.1387      | 1168.0730        | 2334.1547      | 1167.5810        | 19 |
| 4  | 442.2296  | 221.6185        | 425.2031       | 213.1052         | 424.2191        | 212.6132         | L    | 2224.1067        | 1112.5570       | 2207.0801      | 1104.0437        | 2206.0961      | 1103.5517        | 18 |
| 5  | 539.2824  | 270.1448        | 522.2558       | 261.6316         | 521.2718        | 261.1396         | P    | <b>2111.0226</b> | 1056.0149       | 2093.9961      | 1047.5017        | 2093.0121      | 1047.0097        | 17 |
| 6  | 638.3508  | 319.6790        | 621.3243       | <b>311.1658</b>  | 620.3402        | 310.6738         | V    | 2013.9699        | 1007.4886       | 1996.9433      | 998.9753         | 1995.9593      | 998.4833         | 16 |
| 7  | 751.4349  | 376.2211        | 734.4083       | 367.7078         | 733.4243        | 367.2158         | I    | <b>1914.9014</b> | 957.9544        | 1897.8749      | 949.4411         | 1896.8909      | 948.9491         | 15 |
| 8  | 880.4775  | 440.7424        | 863.4509       | 432.2291         | 862.4669        | 431.7371         | E    | <b>1801.8174</b> | 901.4123        | 1784.7908      | <b>892.8991</b>  | 1783.8068      | 892.4070         | 14 |
| 9  | 995.5044  | 498.2558        | 978.4779       | 489.7426         | 977.4938        | 489.2506         | N    | <b>1672.7748</b> | 836.8910        | 1655.7482      | 828.3778         | 1654.7642      | 827.8857         | 13 |
| 10 | 1123.5994 | 562.3033        | 1106.5728      | 553.7900         | 1105.5888       | 553.2980         | K    | <b>1557.7478</b> | 779.3776        | 1540.7213      | 770.8643         | 1539.7373      | 770.3723         | 12 |
| 11 | 1222.6678 | 611.8375        | 1205.6412      | 603.3243         | 1204.6572       | 602.8322         | V    | 1429.6529        | 715.3301        | 1412.6263      | 706.8168         | 1411.6423      | 706.3248         | 11 |
| 12 | 1382.6984 | 691.8529        | 1365.6719      | 683.3396         | 1364.6879       | 682.8476         | C    | 1330.5845        | 665.7959        | 1313.5579      | 657.2826         | 1312.5739      | 656.7906         | 10 |
| 13 | 1497.7254 | 749.3663        | 1480.6988      | 740.8530         | 1479.7148       | 740.3610         | N    | 1170.5538        | 585.7805        | 1153.5273      | 577.2673         | 1152.5432      | 576.7753         | 9  |
| 14 | 1653.8265 | 827.4169        | 1636.7999      | 818.9036         | 1635.8159       | 818.4116         | R    | 1055.5269        | 528.2671        | 1038.5003      | 519.7538         | 1037.5163      | 519.2618         | 8  |
| 15 | 1816.8898 | 908.9485        | 1799.8633      | 900.4353         | 1798.8792       | 899.9433         | Y    | 899.4258         | 450.2165        | 882.3992       | 441.7032         | 881.4152       | 441.2112         | 7  |
| 16 | 1945.9324 | 973.4698        | 1928.9059      | 964.9566         | 1927.9218       | 964.4646         | E    | 736.3624         | 368.6849        | 719.3359       | 360.1716         | 718.3519       | 359.6796         | 6  |
| 17 | 2093.0008 | 1047.0040       | 2075.9743      | 1038.4908        | 2074.9903       | 1037.9988        | F    | 607.3198         | 304.1636        | 590.2933       | 295.6503         |                |                  | 5  |

|    |           |           |           |           |           |           |   |          |          |          |          |  |  |   |
|----|-----------|-----------|-----------|-----------|-----------|-----------|---|----------|----------|----------|----------|--|--|---|
| 18 | 2206.0849 | 1103.5461 | 2189.0583 | 1095.0328 | 2188.0743 | 1094.5408 | L | 460.2514 | 230.6293 | 443.2249 | 222.1161 |  |  | 4 |
| 19 | 2321.1118 | 1161.0596 | 2304.0853 | 1152.5463 | 2303.1013 | 1152.0543 | N | 347.1674 | 174.0873 | 330.1408 | 165.5740 |  |  | 3 |
| 20 | 2378.1333 | 1189.5703 | 2361.1067 | 1181.0570 | 2360.1227 | 1180.5650 | G | 232.1404 | 116.5738 | 215.1139 | 108.0606 |  |  | 2 |
| 21 |           |           |           |           |           |           | R | 175.1190 | 88.0631  | 158.0924 | 79.5498  |  |  | 1 |

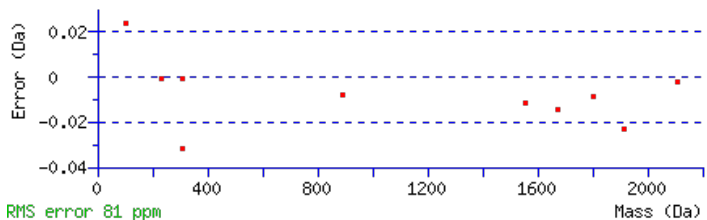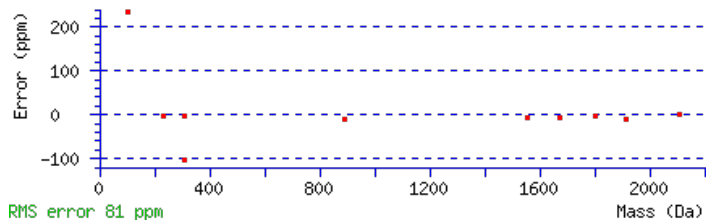

NCBI **BLAST** search of [EAQLPVIENKVCNRYEFLNGR](#)  
 (Parameters: blastp, nr protein database, expect=20000, no filter, PAM30)  
 Other BLAST [web gateways](#)

**All matches to this query**

| Score | Mr(calc)  | Delta   | Sequence                              |
|-------|-----------|---------|---------------------------------------|
| 21.8  | 2551.2376 | -0.0004 | <a href="#">EAQLPVIENKVCNRYEFLNGR</a> |

Mascot: <http://www.matrixscience.com/>

# Mascot Search Results

## Peptide View

MS/MS Fragmentation of **EAQLPVIENKVCNRYEFLNGR**

Found in **P00747** in **uni\_human\_nr**, PLMN\_HUMAN Plasminogen OS=Homo sapiens GN=PLG PE=1 SV=2

Match to Query 11809: 2550.258496 from(638.571900,4+) intensity(236151.2969) rtinseconds(2350) scans(13506) index(10352)

Title: 130809\_HPL\_Human\_Plaque\_BR2\_TR3\_09\_Spectrum031679\_scans\_\_13506\_RTINSECONDS=2350

Data file E:\\RAW\\HumanPlaques\\mgf\\T\\1D\\T130809\_HPL\_Human\_Plaque\_BR2\_TR3\_09.mgf

Click mouse within plot area to zoom in by factor of two about that point

Or,  to  Da

Label all possible matches  Label matches used for scoring

Show Y-axis

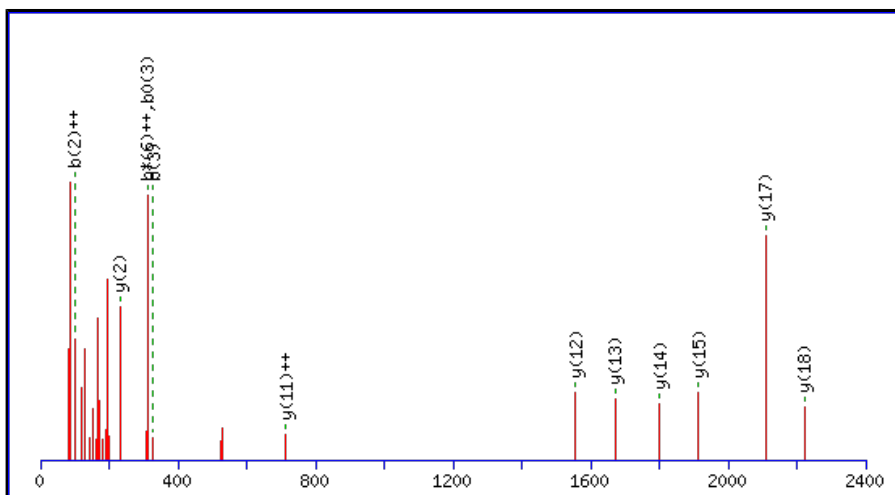

Monoisotopic mass of neutral peptide **Mr(calc):** 2550.2536

Fixed modifications: Carbamidomethyl (C) (apply to specified residues or termini only)

Variable modifications:

N9 : Deamidated (NQ)

N19 : Deamidated (NQ)

Ions Score: 40 Expect: 0.0098

Matches : 12/226 fragment ions using 19 most intense peaks ([help](#))

| #  | b               | b <sup>++</sup> | b <sup>*</sup> | b <sup>***</sup> | b <sup>0</sup>  | b <sup>0++</sup> | Seq. | y                | y <sup>++</sup> | y <sup>*</sup> | y <sup>***</sup> | y <sup>0</sup> | y <sup>0++</sup> | #  |
|----|-----------------|-----------------|----------------|------------------|-----------------|------------------|------|------------------|-----------------|----------------|------------------|----------------|------------------|----|
| 1  | 130.0499        | 65.5286         |                |                  | 112.0393        | 56.5233          | E    |                  |                 |                |                  |                |                  | 21 |
| 2  | 201.0870        | <b>101.0471</b> |                |                  | 183.0764        | 92.0418          | A    | 2422.2184        | 1211.6128       | 2405.1918      | 1203.0995        | 2404.2078      | 1202.6075        | 20 |
| 3  | <b>329.1456</b> | 165.0764        | 312.1190       | 156.5631         | <b>311.1350</b> | 156.0711         | Q    | 2351.1812        | 1176.0943       | 2334.1547      | 1167.5810        | 2333.1707      | 1167.0890        | 19 |
| 4  | 442.2296        | 221.6185        | 425.2031       | 213.1052         | 424.2191        | 212.6132         | L    | <b>2223.1227</b> | 1112.0650       | 2206.0961      | 1103.5517        | 2205.1121      | 1103.0597        | 18 |
| 5  | 539.2824        | 270.1448        | 522.2558       | 261.6316         | 521.2718        | 261.1396         | P    | <b>2110.0386</b> | 1055.5229       | 2093.0121      | 1047.0097        | 2092.0280      | 1046.5177        | 17 |
| 6  | 638.3508        | 319.6790        | 621.3243       | <b>311.1658</b>  | 620.3402        | 310.6738         | V    | 2012.9858        | 1006.9966       | 1995.9593      | 998.4833         | 1994.9753      | 997.9913         | 16 |
| 7  | 751.4349        | 376.2211        | 734.4083       | 367.7078         | 733.4243        | 367.2158         | I    | <b>1913.9174</b> | 957.4623        | 1896.8909      | 948.9491         | 1895.9069      | 948.4571         | 15 |
| 8  | 880.4775        | 440.7424        | 863.4509       | 432.2291         | 862.4669        | 431.7371         | E    | <b>1800.8334</b> | 900.9203        | 1783.8068      | 892.4070         | 1782.8228      | 891.9150         | 14 |
| 9  | 995.5044        | 498.2558        | 978.4779       | 489.7426         | 977.4938        | 489.2506         | N    | <b>1671.7908</b> | 836.3990        | 1654.7642      | 827.8857         | 1653.7802      | 827.3937         | 13 |
| 10 | 1123.5994       | 562.3033        | 1106.5728      | 553.7900         | 1105.5888       | 553.2980         | K    | <b>1556.7638</b> | 778.8855        | 1539.7373      | 770.3723         | 1538.7533      | 769.8803         | 12 |
| 11 | 1222.6678       | 611.8375        | 1205.6412      | 603.3243         | 1204.6572       | 602.8322         | V    | 1428.6689        | <b>714.8381</b> | 1411.6423      | 706.3248         | 1410.6583      | 705.8328         | 11 |
| 12 | 1382.6984       | 691.8529        | 1365.6719      | 683.3396         | 1364.6879       | 682.8476         | C    | 1329.6004        | 665.3039        | 1312.5739      | 656.7906         | 1311.5899      | 656.2986         | 10 |
| 13 | 1496.7414       | 748.8743        | 1479.7148      | 740.3610         | 1478.7308       | 739.8690         | N    | 1169.5698        | 585.2885        | 1152.5432      | 576.7753         | 1151.5592      | 576.2833         | 9  |
| 14 | 1652.8425       | 826.9249        | 1635.8159      | 818.4116         | 1634.8319       | 817.9196         | R    | 1055.5269        | 528.2671        | 1038.5003      | 519.7538         | 1037.5163      | 519.2618         | 8  |
| 15 | 1815.9058       | 908.4565        | 1798.8792      | 899.9433         | 1797.8952       | 899.4513         | Y    | 899.4258         | 450.2165        | 882.3992       | 441.7032         | 881.4152       | 441.2112         | 7  |
| 16 | 1944.9484       | 972.9778        | 1927.9218      | 964.4646         | 1926.9378       | 963.9726         | E    | 736.3624         | 368.6849        | 719.3359       | 360.1716         | 718.3519       | 359.6796         | 6  |
| 17 | 2092.0168       | 1046.5120       | 2074.9903      | 1037.9988        | 2074.0062       | 1037.5068        | F    | 607.3198         | 304.1636        | 590.2933       | 295.6503         |                |                  | 5  |



|    |           |           |           |           |           |           |   |          |          |          |          |  |  |   |
|----|-----------|-----------|-----------|-----------|-----------|-----------|---|----------|----------|----------|----------|--|--|---|
| 18 | 2205.1009 | 1103.0541 | 2188.0743 | 1094.5408 | 2187.0903 | 1094.0488 | L | 460.2514 | 230.6293 | 443.2249 | 222.1161 |  |  | 4 |
| 19 | 2320.1278 | 1160.5675 | 2303.1013 | 1152.0543 | 2302.1172 | 1151.5623 | N | 347.1674 | 174.0873 | 330.1408 | 165.5740 |  |  | 3 |
| 20 | 2377.1493 | 1189.0783 | 2360.1227 | 1180.5650 | 2359.1387 | 1180.0730 | G | 232.1404 | 116.5738 | 215.1139 | 108.0606 |  |  | 2 |
| 21 |           |           |           |           |           |           | R | 175.1190 | 88.0631  | 158.0924 | 79.5498  |  |  | 1 |

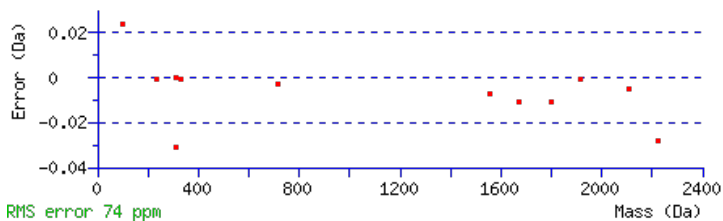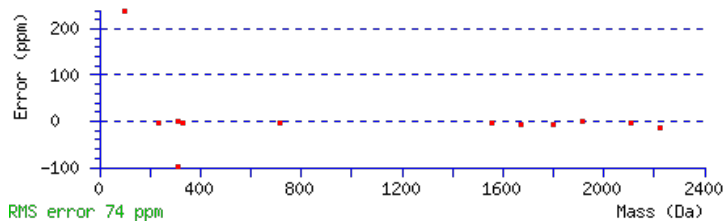

NCBI BLAST search of [EAQLPVIENKVCNRYEFLNGR](#)  
 (Parameters: blastp, nr protein database, expect=20000, no filter, PAM30)  
 Other BLAST [web gateways](#)

All matches to this query

| Score | Mr(calc)  | Delta  | Sequence                                 | Site Analysis             |
|-------|-----------|--------|------------------------------------------|---------------------------|
| 39.9  | 2550.2536 | 0.0049 | <a href="#">EAQLPVIENKVCNRYEFLNGR</a>    | Deamidated N9, N19 48.66% |
| 39.9  | 2550.2536 | 0.0049 | <a href="#">EAQLPVIENKVCNRYEFLNGR</a>    | Deamidated N9, N13 48.66% |
| 27.3  | 2550.2536 | 0.0049 | <a href="#">EAQLPVIENKVCNRYEFLNGR</a>    | Deamidated N13, N19 2.67% |
| 0.7   | 2550.2496 | 0.0089 | <a href="#">MEAPEEPAPVRGGPEATLEVRGSR</a> |                           |

Mascot: <http://www.matrixscience.com/>

# Mascot Search Results

## Peptide View

MS/MS Fragmentation of **VCNRYEFLNGR**

Found in **P00747** in **uni\_human\_nr**, PLMN\_HUMAN Plasminogen OS=Homo sapiens GN=PLG PE=1 SV=2

Match to Query 3162: 1428.646872 from(477.222900,3+) intensity(612972.4375) rtinseconds(1600) scans(8281) index(5949)

Title: 130809\_HPL\_Human\_Plaque\_BR2\_TR3\_09\_Spectrum027276\_scans\_8281\_RTINSECONDS=1600

Data file E:\RAW\HumanPlaques\mgf\T\1D\T130809\_HPL\_Human\_Plaque\_BR2\_TR3\_09.mgf

Click mouse within plot area to zoom in by factor of two about that point

Or,  to  Da

Label all possible matches  Label matches used for scoring

Show Y-axis

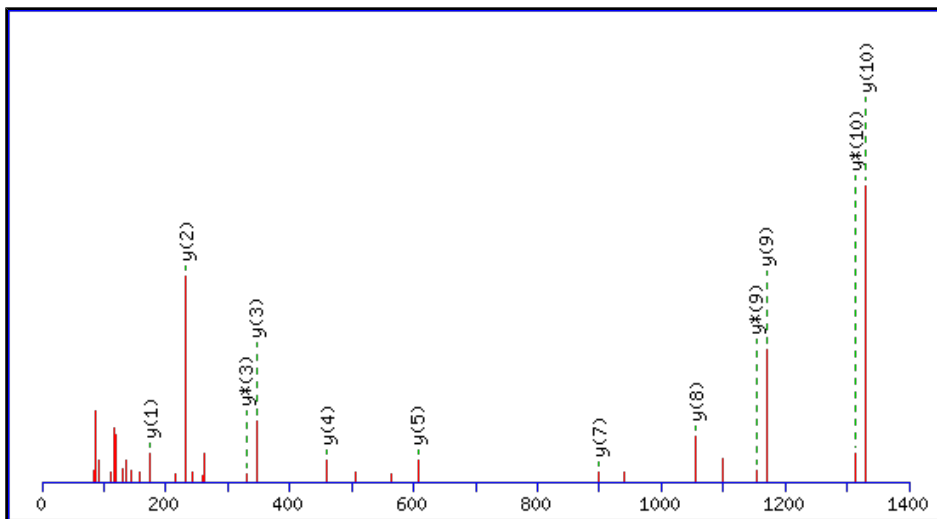

Monoisotopic mass of neutral peptide  $M_r(\text{calc})$ : 1428.6456

Fixed modifications: Carbamidomethyl (C) (apply to specified residues or termini only)

Variable modifications:

N3 : Deamidated (NQ)

N9 : Deamidated (NQ)

Ions Score: 69 Expect: 3.8e-006

Matches : 12/96 fragment ions using 22 most intense peaks ([help](#))

| #  | b         | b <sup>++</sup> | b <sup>*</sup> | b <sup>*++</sup> | b <sup>0</sup> | b <sup>0++</sup> | Seq. | y         | y <sup>++</sup> | y <sup>*</sup> | y <sup>*++</sup> | y <sup>0</sup> | y <sup>0++</sup> | #  |
|----|-----------|-----------------|----------------|------------------|----------------|------------------|------|-----------|-----------------|----------------|------------------|----------------|------------------|----|
| 1  | 100.0757  | 50.5415         |                |                  |                |                  | V    |           |                 |                |                  |                |                  | 11 |
| 2  | 260.1063  | 130.5568        |                |                  |                |                  | C    | 1330.5845 | 665.7959        | 1313.5579      | 657.2826         | 1312.5739      | 656.7906         | 10 |
| 3  | 375.1333  | 188.0703        | 358.1067       | 179.5570         |                |                  | N    | 1170.5538 | 585.7805        | 1153.5273      | 577.2673         | 1152.5432      | 576.7753         | 9  |
| 4  | 531.2344  | 266.1208        | 514.2078       | 257.6076         |                |                  | R    | 1055.5269 | 528.2671        | 1038.5003      | 519.7538         | 1037.5163      | 519.2618         | 8  |
| 5  | 694.2977  | 347.6525        | 677.2712       | 339.1392         |                |                  | Y    | 899.4258  | 450.2165        | 882.3992       | 441.7032         | 881.4152       | 441.2112         | 7  |
| 6  | 823.3403  | 412.1738        | 806.3138       | 403.6605         | 805.3297       | 403.1685         | E    | 736.3624  | 368.6849        | 719.3359       | 360.1716         | 718.3519       | 359.6796         | 6  |
| 7  | 970.4087  | 485.7080        | 953.3822       | 477.1947         | 952.3982       | 476.7027         | F    | 607.3198  | 304.1636        | 590.2933       | 295.6503         |                |                  | 5  |
| 8  | 1083.4928 | 542.2500        | 1066.4662      | 533.7368         | 1065.4822      | 533.2448         | L    | 460.2514  | 230.6293        | 443.2249       | 222.1161         |                |                  | 4  |
| 9  | 1198.5197 | 599.7635        | 1181.4932      | 591.2502         | 1180.5092      | 590.7582         | N    | 347.1674  | 174.0873        | 330.1408       | 165.5740         |                |                  | 3  |
| 10 | 1255.5412 | 628.2742        | 1238.5147      | 619.7610         | 1237.5306      | 619.2690         | G    | 232.1404  | 116.5738        | 215.1139       | 108.0606         |                |                  | 2  |
| 11 |           |                 |                |                  |                |                  | R    | 175.1190  | 88.0631         | 158.0924       | 79.5498          |                |                  | 1  |

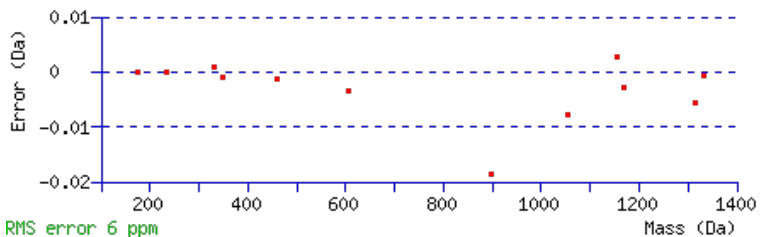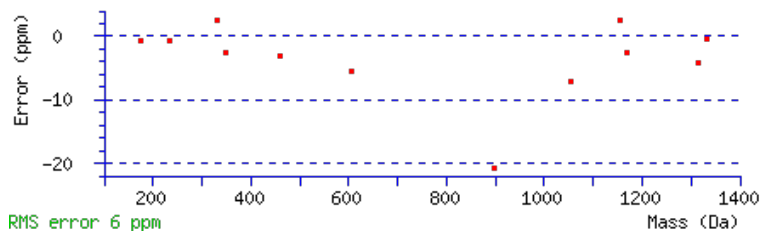

NCBI BLAST search of [VCNRYEFLNGR](#)

(Parameters: blastp, nr protein database, expect=20000, no filter, PAM30)

Other BLAST [web gateways](#)

**All matches to this query**

| Score | Mr(calc)  | Delta  | Sequence                     |
|-------|-----------|--------|------------------------------|
| 69.4  | 1428.6456 | 0.0013 | <a href="#">VCNRYEFLNGR</a>  |
| 11.5  | 1428.6456 | 0.0013 | <a href="#">VCFOYLNRGDR</a>  |
| 2.8   | 1427.6463 | 1.0006 | <a href="#">KMSQNTQDGYTR</a> |
| 0.1   | 1427.6389 | 1.0080 | <a href="#">EHLQRQNSSNGR</a> |
| 0.1   | 1427.6389 | 1.0080 | <a href="#">EHLQRQNSSNGR</a> |
| 0.1   | 1427.6389 | 1.0080 | <a href="#">EHLQRQNSSNGR</a> |

Mascot: <http://www.matrixscience.com/>

# Mascot Search Results

## Peptide View

MS/MS Fragmentation of **VCNRYEFLNGR**

Found in **P00747** in **uni\_human\_nr**, PLMN\_HUMAN Plasminogen OS=Homo sapiens GN=PLG PE=1 SV=2

Match to Query 3527: 1427.660022 from(476.893950,3+) intensity(1944138.5000) rtinseconds(1401) scans(7580) index(5459)

Title: 130806\_HPL\_Human\_Plaque\_BR1\_TR2\_03\_Spectrum029398\_scans\_7580\_RTINSECONDS=1401

Data file E:\RAW\HumanPlaques\mgf\T\1D\T130806\_HPL\_Human\_Plaque\_BR1\_TR2\_03.mgf

Click mouse within plot area to zoom in by factor of two about that point

Or,  to  Da

Label all possible matches  Label matches used for scoring

Show Y-axis

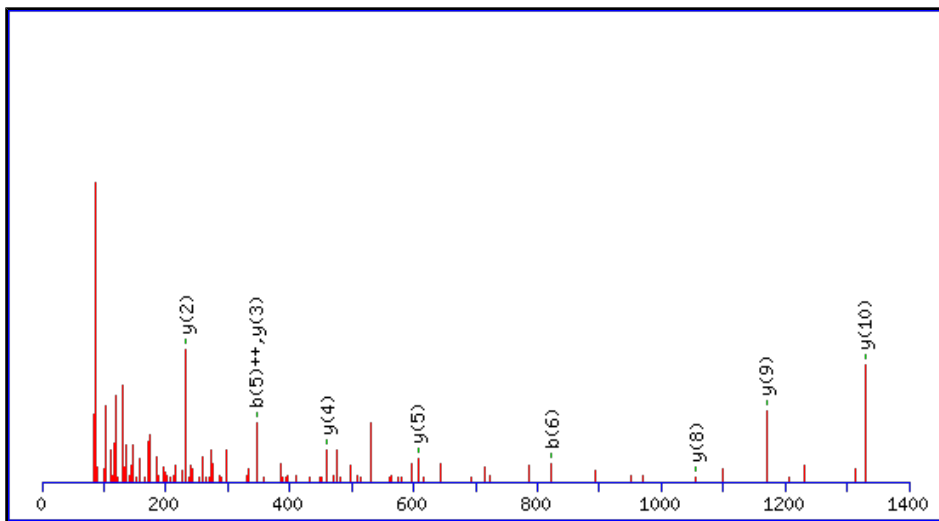

**Monoisotopic mass of neutral peptide Mr(calc):** 1427.6616

**Fixed modifications:** Carbamidomethyl (C) (apply to specified residues or termini only)

**Variable modifications:**

**N9** : Deamidated (NQ)

**Ions Score:** 49 **Expect:** 0.00063

**Matches :** 9/96 fragment ions using 13 most intense peaks ([help](#))

| #  | b         | b <sup>++</sup> | b <sup>*</sup> | b <sup>***</sup> | b <sup>0</sup> | b <sup>0++</sup> | Seq. | y         | y <sup>++</sup> | y <sup>*</sup> | y <sup>***</sup> | y <sup>0</sup> | y <sup>0++</sup> | #  |
|----|-----------|-----------------|----------------|------------------|----------------|------------------|------|-----------|-----------------|----------------|------------------|----------------|------------------|----|
| 1  | 100.0757  | 50.5415         |                |                  |                |                  | V    |           |                 |                |                  |                |                  | 11 |
| 2  | 260.1063  | 130.5568        |                |                  |                |                  | C    | 1329.6004 | 665.3039        | 1312.5739      | 656.7906         | 1311.5899      | 656.2986         | 10 |
| 3  | 374.1493  | 187.5783        | 357.1227       | 179.0650         |                |                  | N    | 1169.5698 | 585.2885        | 1152.5432      | 576.7753         | 1151.5592      | 576.2833         | 9  |
| 4  | 530.2504  | 265.6288        | 513.2238       | 257.1156         |                |                  | R    | 1055.5269 | 528.2671        | 1038.5003      | 519.7538         | 1037.5163      | 519.2618         | 8  |
| 5  | 693.3137  | 347.1605        | 676.2872       | 338.6472         |                |                  | Y    | 899.4258  | 450.2165        | 882.3992       | 441.7032         | 881.4152       | 441.2112         | 7  |
| 6  | 822.3563  | 411.6818        | 805.3298       | 403.1685         | 804.3457       | 402.6765         | E    | 736.3624  | 368.6849        | 719.3359       | 360.1716         | 718.3519       | 359.6796         | 6  |
| 7  | 969.4247  | 485.2160        | 952.3982       | 476.7027         | 951.4141       | 476.2107         | F    | 607.3198  | 304.1636        | 590.2933       | 295.6503         |                |                  | 5  |
| 8  | 1082.5088 | 541.7580        | 1065.4822      | 533.2448         | 1064.4982      | 532.7527         | L    | 460.2514  | 230.6293        | 443.2249       | 222.1161         |                |                  | 4  |
| 9  | 1197.5357 | 599.2715        | 1180.5092      | 590.7582         | 1179.5252      | 590.2662         | N    | 347.1674  | 174.0873        | 330.1408       | 165.5740         |                |                  | 3  |
| 10 | 1254.5572 | 627.7822        | 1237.5306      | 619.2690         | 1236.5466      | 618.7769         | G    | 232.1404  | 116.5738        | 215.1139       | 108.0606         |                |                  | 2  |
| 11 |           |                 |                |                  |                |                  | R    | 175.1190  | 88.0631         | 158.0924       | 79.5498          |                |                  | 1  |

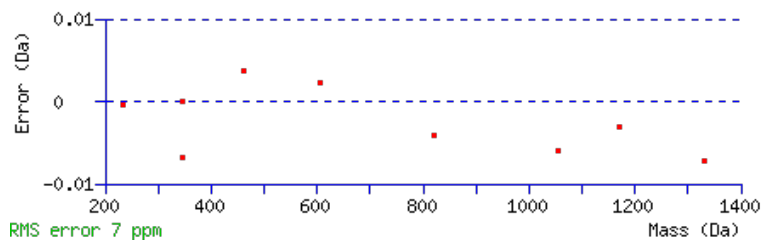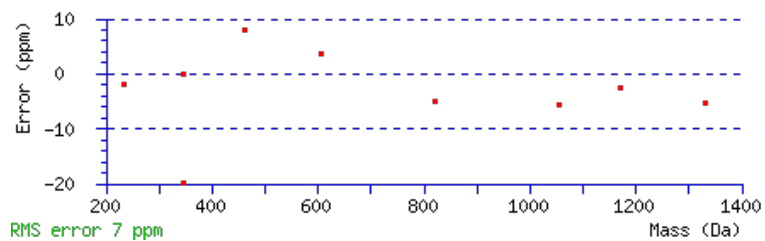

NCBI BLAST search of [VCNRYEFLNGR](#)

(Parameters: blastp, nr protein database, expect=20000, no filter, PAM30)

Other BLAST [web gateways](#)

**All matches to this query**

| Score | Mr(calc)  | Delta   | Sequence                    | Site Analysis         |
|-------|-----------|---------|-----------------------------|-----------------------|
| 48.5  | 1427.6616 | -0.0015 | <a href="#">VCNRYEFLNGR</a> | Deamidated N9 100.00% |
| 0.7   | 1427.6616 | -0.0015 | <a href="#">VCNRYEFLNGR</a> | Deamidated N3 0.00%   |
| 0.3   | 1427.6616 | -0.0016 | <a href="#">VCFQYLNRGDR</a> |                       |

Mascot: <http://www.matrixscience.com/>

# Mascot Search Results

## Peptide View

MS/MS Fragmentation of **VCNRYEFLNGR**

Found in **P00747** in **uni\_human\_nr**, PLMN\_HUMAN Plasminogen OS=Homo sapiens GN=PLG PE=1 SV=2

Match to Query 3981: 1426.676472 from(476.566100,3+) intensity(14840261.0000) rtinseconds(1181) scans(5596) index(3506)

Title: 130809\_HPL\_Human\_Plaque\_BR2\_TR3\_02\_Spectrum028359\_scans\_5596\_RTINSECONDS=1181

Data file E:\RAW\HumanPlaques\mgf\T\1D\T130809\_HPL\_Human\_Plaque\_BR2\_TR3\_02.mgf

Click mouse within plot area to zoom in by factor of two about that point

Or,  to  Da

Label all possible matches  Label matches used for scoring

Show Y-axis

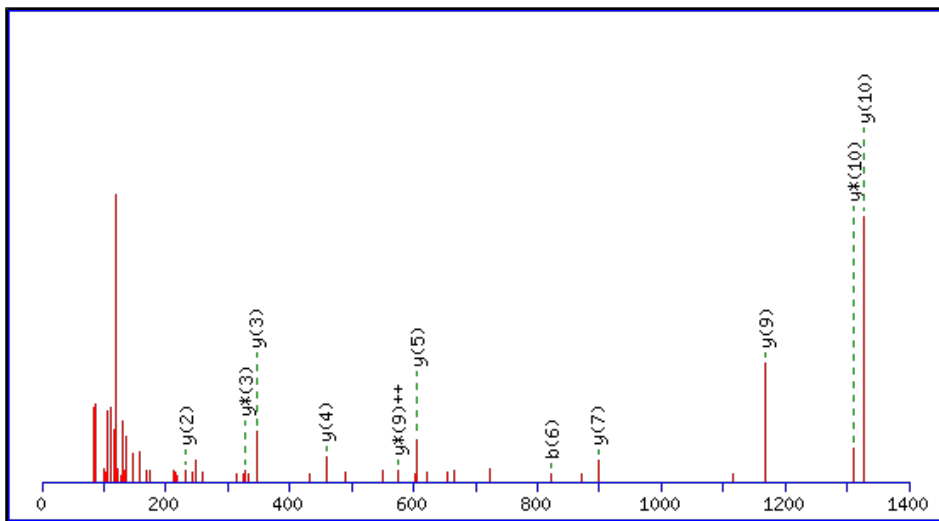

Monoisotopic mass of neutral peptide Mr(calc): 1426.6776

Fixed modifications: Carbamidomethyl (C) (apply to specified residues or termini only)

Ions Score: 44 Expect: 0.0024

Matches : 11/96 fragment ions using 20 most intense peaks ([help](#))

| #  | b         | b <sup>++</sup> | b <sup>*</sup> | b <sup>*++</sup> | b <sup>0</sup> | b <sup>0++</sup> | Seq. | y         | y <sup>++</sup> | y <sup>*</sup> | y <sup>*++</sup> | y <sup>0</sup> | y <sup>0++</sup> | #  |
|----|-----------|-----------------|----------------|------------------|----------------|------------------|------|-----------|-----------------|----------------|------------------|----------------|------------------|----|
| 1  | 100.0757  | 50.5415         |                |                  |                |                  | V    |           |                 |                |                  |                |                  | 11 |
| 2  | 260.1063  | 130.5568        |                |                  |                |                  | C    | 1328.6164 | 664.8119        | 1311.5899      | 656.2986         | 1310.6059      | 655.8066         | 10 |
| 3  | 374.1493  | 187.5783        | 357.1227       | 179.0650         |                |                  | N    | 1168.5858 | 584.7965        | 1151.5592      | 576.2833         | 1150.5752      | 575.7912         | 9  |
| 4  | 530.2504  | 265.6288        | 513.2238       | 257.1156         |                |                  | R    | 1054.5429 | 527.7751        | 1037.5163      | 519.2618         | 1036.5323      | 518.7698         | 8  |
| 5  | 693.3137  | 347.1605        | 676.2872       | 338.6472         |                |                  | Y    | 898.4417  | 449.7245        | 881.4152       | 441.2112         | 880.4312       | 440.7192         | 7  |
| 6  | 822.3563  | 411.6818        | 805.3298       | 403.1685         | 804.3457       | 402.6765         | E    | 735.3784  | 368.1928        | 718.3519       | 359.6796         | 717.3678       | 359.1876         | 6  |
| 7  | 969.4247  | 485.2160        | 952.3982       | 476.7027         | 951.4141       | 476.2107         | F    | 606.3358  | 303.6715        | 589.3093       | 295.1583         |                |                  | 5  |
| 8  | 1082.5088 | 541.7580        | 1065.4822      | 533.2448         | 1064.4982      | 532.7527         | L    | 459.2674  | 230.1373        | 442.2409       | 221.6241         |                |                  | 4  |
| 9  | 1196.5517 | 598.7795        | 1179.5252      | 590.2662         | 1178.5411      | 589.7742         | N    | 346.1833  | 173.5953        | 329.1568       | 165.0820         |                |                  | 3  |
| 10 | 1253.5732 | 627.2902        | 1236.5466      | 618.7769         | 1235.5626      | 618.2849         | G    | 232.1404  | 116.5738        | 215.1139       | 108.0606         |                |                  | 2  |
| 11 |           |                 |                |                  |                |                  | R    | 175.1190  | 88.0631         | 158.0924       | 79.5498          |                |                  | 1  |

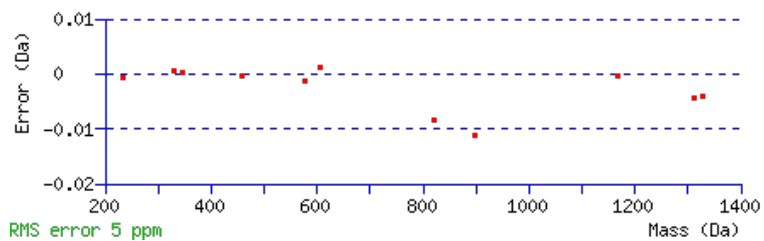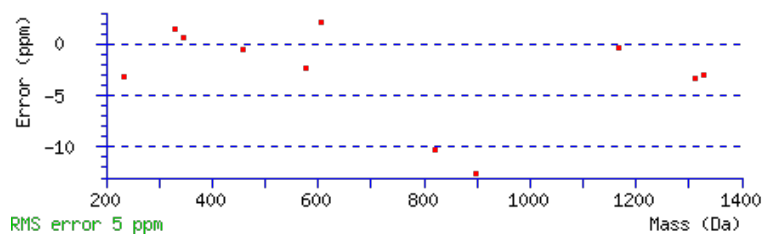

NCBI BLAST search of [VCNRYEFLNGR](#)

(Parameters: blastp, nr protein database, expect=20000, no filter, PAM30)

Other BLAST [web gateways](#)

**All matches to this query**

| Score | Mr(calc)  | Delta   | Sequence                     |
|-------|-----------|---------|------------------------------|
| 43.5  | 1426.6776 | -0.0011 | <a href="#">VCNRYEFLNGR</a>  |
| 0.8   | 1426.6704 | 0.0061  | <a href="#">VAPIWACPHEET</a> |

Mascot: <http://www.matrixscience.com/>

# Mascot Search Results

## Peptide View

MS/MS Fragmentation of **YEFLNGR**

Found in **P00747** in **uni\_human\_nr**, PLMN\_HUMAN Plasminogen OS=Homo sapiens GN=PLG PE=1 SV=2

Match to Query 294: 898.418368 from(450.216460,2+) intensity(4647658.0000) rtinseconds(1664) scans(9090) index(6699)

Title: 130809\_HPL\_Human\_Plaque\_BR1\_TR3\_06\_Spectrum029053\_scans\_\_9090\_RTINSECONDS=1664

Data file E:\\RAW\\HumanPlaques\\mgf\\T\\1D\\T130809\_HPL\_Human\_Plaque\_BR1\_TR3\_06.mgf

Click mouse within plot area to zoom in by factor of two about that point

Or,  to  Da

Label all possible matches  Label matches used for scoring

Show Y-axis

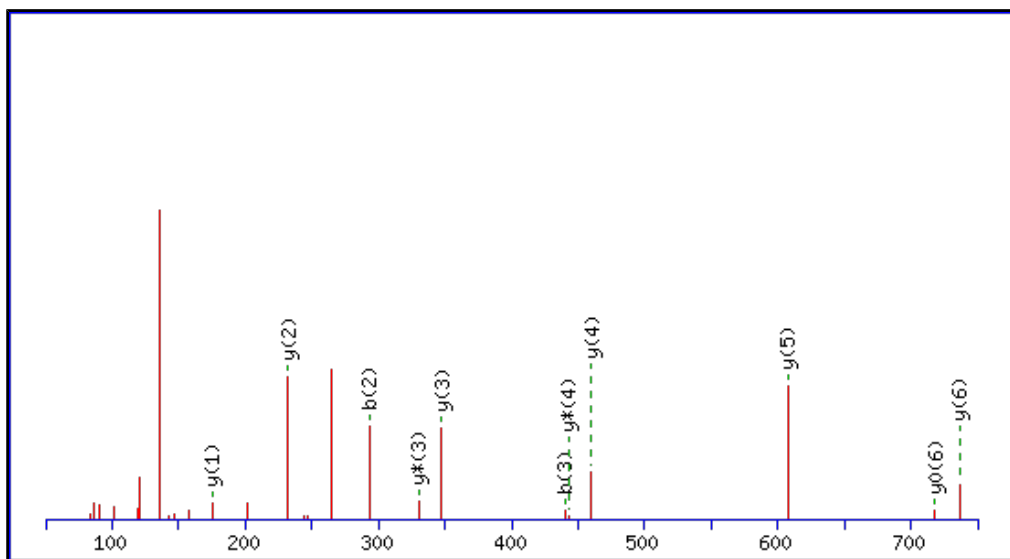

Monoisotopic mass of neutral peptide **Mr(calc)**: 898.4185

**Fixed modifications**: Carbamidomethyl (C) (apply to specified residues or termini only)

**Variable modifications**:

N5 : Deamidated (NQ)

**Ions Score**: 51 **Expect**: 0.00023

**Matches** : 11/52 fragment ions using 15 most intense peaks ([help](#))

| # | b               | b <sup>++</sup> | b <sup>*</sup> | b <sup>***</sup> | b <sup>0</sup> | b <sup>0++</sup> | Seq. | y               | y <sup>++</sup> | y <sup>*</sup>  | y <sup>***</sup> | y <sup>0</sup>  | y <sup>0++</sup> | # |
|---|-----------------|-----------------|----------------|------------------|----------------|------------------|------|-----------------|-----------------|-----------------|------------------|-----------------|------------------|---|
| 1 | 164.0706        | 82.5389         |                |                  |                |                  | Y    |                 |                 |                 |                  |                 |                  | 7 |
| 2 | <b>293.1132</b> | 147.0602        |                |                  | 275.1026       | 138.0550         | E    | <b>736.3624</b> | 368.6849        | 719.3359        | 360.1716         | <b>718.3519</b> | 359.6796         | 6 |
| 3 | <b>440.1816</b> | 220.5944        |                |                  | 422.1710       | 211.5892         | F    | <b>607.3198</b> | 304.1636        | 590.2933        | 295.6503         |                 |                  | 5 |
| 4 | 553.2657        | 277.1365        |                |                  | 535.2551       | 268.1312         | L    | <b>460.2514</b> | 230.6293        | <b>443.2249</b> | 222.1161         |                 |                  | 4 |
| 5 | 668.2926        | 334.6499        | 651.2661       | 326.1367         | 650.2821       | 325.6447         | N    | <b>347.1674</b> | 174.0873        | <b>330.1408</b> | 165.5740         |                 |                  | 3 |
| 6 | 725.3141        | 363.1607        | 708.2875       | 354.6474         | 707.3035       | 354.1554         | G    | <b>232.1404</b> | 116.5738        | 215.1139        | 108.0606         |                 |                  | 2 |
| 7 |                 |                 |                |                  |                |                  | R    | <b>175.1190</b> | 88.0631         | 158.0924        | 79.5498          |                 |                  | 1 |



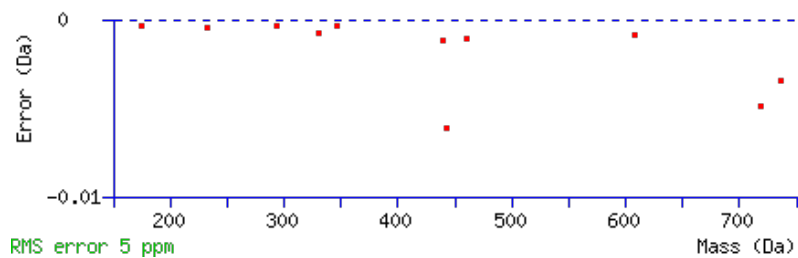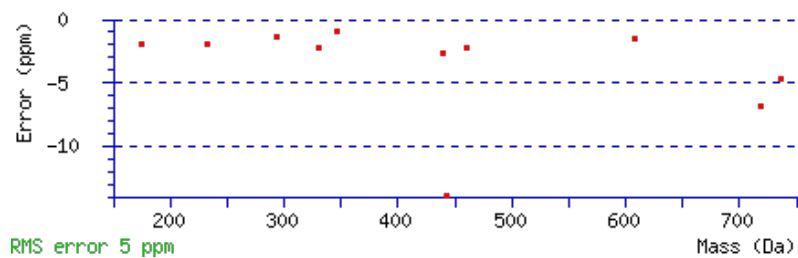

NCBI **BLAST** search of [YEFLNGR](#)

(Parameters: blastp, nr protein database, expect=20000, no filter, PAM30)

Other BLAST [web gateways](#)

**All matches to this query**

| Score | Mr(calc) | Delta   | Sequence                 |
|-------|----------|---------|--------------------------|
| 50.7  | 898.4185 | -0.0001 | <a href="#">YEFLNGR</a>  |
| 15.9  | 898.4185 | -0.0001 | <a href="#">YFIEDGR</a>  |
| 15.9  | 898.4185 | -0.0001 | <a href="#">YLFENGR</a>  |
| 4.2   | 898.4144 | 0.0039  | <a href="#">YKDSSSGR</a> |

Mascot: <http://www.matrixscience.com/>

# Mascot Search Results

## Peptide View

MS/MS Fragmentation of **YEFLNGRVQSTELCAGHLAGGTDSCQGDSSGGLVCFEK**

Found in **P00747** in **uni\_human\_nr**, PLMN\_HUMAN Plasminogen OS=Homo sapiens GN=PLG PE=1 SV=2

Match to Query 17111: 4117.822936 from(1030.463010,4+) intensity(752991.0625) rtinseconds(2874) scans(16785) index(12921)

Title: 130806\_HPL\_Human\_Plaque\_BR2\_TR2\_10\_Spectrum033842\_scans\_\_16785\_RTINSECONDS=2874

Data file E:\\RAW\\HumanPlaques\\imgf\\T\\1D\\T130806\_HPL\_Human\_Plaque\_BR2\_TR2\_10.mgf

Click mouse within plot area to zoom in by factor of two about that point

Or,  to  Da

Label all possible matches  Label matches used for scoring

Show Y-axis

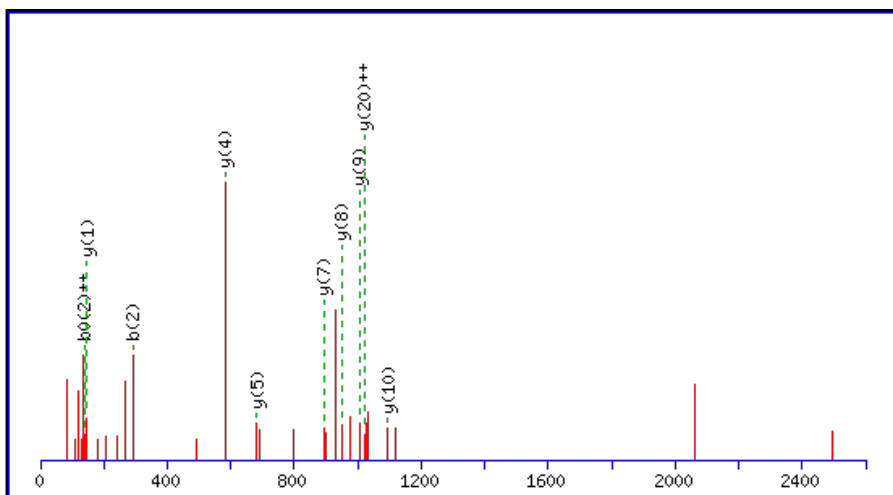

Monoisotopic mass of neutral peptide **Mr(calc):** 4117.8092

**Fixed modifications:** Carbamidomethyl (C) (apply to specified residues or termini only)

**Variable modifications:**

N5 : Deamidated (NQ)

Q9 : Deamidated (NQ)

**Ions Score:** 18 **Expect:** 0.57

**Matches :** 10/432 fragment ions using 32 most intense peaks ([help](#))

| #  | b               | b <sup>++</sup> | b <sup>*</sup> | b <sup>***</sup> | b <sup>0</sup> | b <sup>0++</sup> | Seq. | y         | y <sup>++</sup> | y <sup>*</sup> | y <sup>***</sup> | y <sup>0</sup> | y <sup>0++</sup> | #  |
|----|-----------------|-----------------|----------------|------------------|----------------|------------------|------|-----------|-----------------|----------------|------------------|----------------|------------------|----|
| 1  | 164.0706        | 82.5389         |                |                  |                |                  | Y    |           |                 |                |                  |                |                  | 38 |
| 2  | <b>293.1132</b> | 147.0602        |                |                  | 275.1026       | <b>138.0550</b>  | E    | 3955.7531 | 1978.3802       | 3938.7266      | 1969.8669        | 3937.7426      | 1969.3749        | 37 |
| 3  | 440.1816        | 220.5944        |                |                  | 422.1710       | 211.5892         | F    | 3826.7106 | 1913.8589       | 3809.6840      | 1905.3456        | 3808.7000      | 1904.8536        | 36 |
| 4  | 553.2657        | 277.1365        |                |                  | 535.2551       | 268.1312         | L    | 3679.6421 | 1840.3247       | 3662.6156      | 1831.8114        | 3661.6316      | 1831.3194        | 35 |
| 5  | 668.2926        | 334.6499        | 651.2661       | 326.1367         | 650.2821       | 325.6447         | N    | 3566.5581 | 1783.7827       | 3549.5315      | 1775.2694        | 3548.5475      | 1774.7774        | 34 |
| 6  | 725.3141        | 363.1607        | 708.2875       | 354.6474         | 707.3035       | 354.1554         | G    | 3451.5311 | 1726.2692       | 3434.5046      | 1717.7559        | 3433.5206      | 1717.2639        | 33 |
| 7  | 881.4152        | 441.2112        | 864.3886       | 432.6980         | 863.4046       | 432.2060         | R    | 3394.5097 | 1697.7585       | 3377.4831      | 1689.2452        | 3376.4991      | 1688.7532        | 32 |
| 8  | 980.4836        | 490.7454        | 963.4571       | 482.2322         | 962.4730       | 481.7402         | V    | 3238.4086 | 1619.7079       | 3221.3820      | 1611.1946        | 3220.3980      | 1610.7026        | 31 |
| 9  | 1109.5262       | 555.2667        | 1092.4997      | 546.7535         | 1091.5156      | 546.2615         | Q    | 3139.3401 | 1570.1737       | 3122.3136      | 1561.6604        | 3121.3296      | 1561.1684        | 30 |
| 10 | 1196.5582       | 598.7828        | 1179.5317      | 590.2695         | 1178.5477      | 589.7775         | S    | 3010.2976 | 1505.6524       | 2993.2710      | 1497.1391        | 2992.2870      | 1496.6471        | 29 |
| 11 | 1297.6059       | 649.3066        | 1280.5794      | 640.7933         | 1279.5953      | 640.3013         | T    | 2923.2655 | 1462.1364       | 2906.2390      | 1453.6231        | 2905.2550      | 1453.1311        | 28 |
| 12 | 1426.6485       | 713.8279        | 1409.6220      | 705.3146         | 1408.6379      | 704.8226         | E    | 2822.2178 | 1411.6126       | 2805.1913      | 1403.0993        | 2804.2073      | 1402.6073        | 27 |
| 13 | 1539.7326       | 770.3699        | 1522.7060      | 761.8566         | 1521.7220      | 761.3646         | L    | 2693.1753 | 1347.0913       | 2676.1487      | 1338.5780        | 2675.1647      | 1338.0860        | 26 |
| 14 | 1699.7632       | 850.3852        | 1682.7367      | 841.8720         | 1681.7527      | 841.3800         | C    | 2580.0912 | 1290.5492       | 2563.0646      | 1282.0360        | 2562.0806      | 1281.5439        | 25 |
| 15 | 1770.8003       | 885.9038        | 1753.7738      | 877.3905         | 1752.7898      | 876.8985         | A    | 2420.0605 | 1210.5339       | 2403.0340      | 1202.0206        | 2402.0500      | 1201.5286        | 24 |
| 16 | 1827.8218       | 914.4145        | 1810.7952      | 905.9013         | 1809.8112      | 905.4093         | G    | 2349.0234 | 1175.0153       | 2331.9969      | 1166.5021        | 2331.0129      | 1166.0101        | 23 |
| 17 | 1964.8807       | 982.9440        | 1947.8542      | 974.4307         | 1946.8701      | 973.9387         | H    | 2292.0020 | 1146.5046       | 2274.9754      | 1137.9913        | 2273.9914      | 1137.4993        | 22 |

|    |           |           |           |           |           |           |   |           |           |           |           |           |           |    |
|----|-----------|-----------|-----------|-----------|-----------|-----------|---|-----------|-----------|-----------|-----------|-----------|-----------|----|
| 18 | 2077.9648 | 1039.4860 | 2060.9382 | 1030.9727 | 2059.9542 | 1030.4807 | L | 2154.9430 | 1077.9752 | 2137.9165 | 1069.4619 | 2136.9325 | 1068.9699 | 21 |
| 19 | 2149.0019 | 1075.0046 | 2131.9753 | 1066.4913 | 2130.9913 | 1065.9993 | A | 2041.8590 | 1021.4331 | 2024.8324 | 1012.9199 | 2023.8484 | 1012.4278 | 20 |
| 20 | 2206.0233 | 1103.5153 | 2188.9968 | 1095.0020 | 2188.0128 | 1094.5100 | G | 1970.8219 | 985.9146  | 1953.7953 | 977.4013  | 1952.8113 | 976.9093  | 19 |
| 21 | 2263.0448 | 1132.0260 | 2246.0183 | 1123.5128 | 2245.0342 | 1123.0208 | G | 1913.8004 | 957.4038  | 1896.7739 | 948.8906  | 1895.7898 | 948.3986  | 18 |
| 22 | 2364.0925 | 1182.5499 | 2347.0659 | 1174.0366 | 2346.0819 | 1173.5446 | T | 1856.7789 | 928.8931  | 1839.7524 | 920.3798  | 1838.7684 | 919.8878  | 17 |
| 23 | 2479.1194 | 1240.0634 | 2462.0929 | 1231.5501 | 2461.1089 | 1231.0581 | D | 1755.7313 | 878.3693  | 1738.7047 | 869.8560  | 1737.7207 | 869.3640  | 16 |
| 24 | 2566.1515 | 1283.5794 | 2549.1249 | 1275.0661 | 2548.1409 | 1274.5741 | S | 1640.7043 | 820.8558  | 1623.6778 | 812.3425  | 1622.6938 | 811.8505  | 15 |
| 25 | 2726.1821 | 1363.5947 | 2709.1556 | 1355.0814 | 2708.1715 | 1354.5894 | C | 1553.6723 | 777.3398  | 1536.6457 | 768.8265  | 1535.6617 | 768.3345  | 14 |
| 26 | 2854.2407 | 1427.6240 | 2837.2141 | 1419.1107 | 2836.2301 | 1418.6187 | Q | 1393.6416 | 697.3245  | 1376.6151 | 688.8112  | 1375.6311 | 688.3192  | 13 |
| 27 | 2911.2622 | 1456.1347 | 2894.2356 | 1447.6214 | 2893.2516 | 1447.1294 | G | 1265.5831 | 633.2952  | 1248.5565 | 624.7819  | 1247.5725 | 624.2899  | 12 |
| 28 | 3026.2891 | 1513.6482 | 3009.2625 | 1505.1349 | 3008.2785 | 1504.6429 | D | 1208.5616 | 604.7844  | 1191.5351 | 596.2712  | 1190.5510 | 595.7792  | 11 |
| 29 | 3113.3211 | 1557.1642 | 3096.2946 | 1548.6509 | 3095.3106 | 1548.1589 | S | 1093.5347 | 547.2710  | 1076.5081 | 538.7577  | 1075.5241 | 538.2657  | 10 |
| 30 | 3170.3426 | 1585.6749 | 3153.3160 | 1577.1617 | 3152.3320 | 1576.6696 | G | 1006.5026 | 503.7550  | 989.4761  | 495.2417  | 988.4921  | 494.7497  | 9  |
| 31 | 3227.3641 | 1614.1857 | 3210.3375 | 1605.6724 | 3209.3535 | 1605.1804 | G | 949.4812  | 475.2442  | 932.4546  | 466.7309  | 931.4706  | 466.2389  | 8  |
| 32 | 3324.4168 | 1662.7120 | 3307.3903 | 1654.1988 | 3306.4062 | 1653.7068 | P | 892.4597  | 446.7335  | 875.4332  | 438.2202  | 874.4491  | 437.7282  | 7  |
| 33 | 3437.5009 | 1719.2541 | 3420.4743 | 1710.7408 | 3419.4903 | 1710.2488 | L | 795.4069  | 398.2071  | 778.3804  | 389.6938  | 777.3964  | 389.2018  | 6  |
| 34 | 3536.5693 | 1768.7883 | 3519.5427 | 1760.2750 | 3518.5587 | 1759.7830 | V | 682.3229  | 341.6651  | 665.2963  | 333.1518  | 664.3123  | 332.6598  | 5  |
| 35 | 3696.5999 | 1848.8036 | 3679.5734 | 1840.2903 | 3678.5894 | 1839.7983 | C | 583.2545  | 292.1309  | 566.2279  | 283.6176  | 565.2439  | 283.1256  | 4  |
| 36 | 3843.6684 | 1922.3378 | 3826.6418 | 1913.8245 | 3825.6578 | 1913.3325 | F | 423.2238  | 212.1155  | 406.1973  | 203.6023  | 405.2132  | 203.1103  | 3  |
| 37 | 3972.7109 | 1986.8591 | 3955.6844 | 1978.3458 | 3954.7004 | 1977.8538 | E | 276.1554  | 138.5813  | 259.1288  | 130.0681  | 258.1448  | 129.5761  | 2  |
| 38 |           |           |           |           |           |           | K | 147.1128  | 74.0600   | 130.0863  | 65.5468   |           |           | 1  |

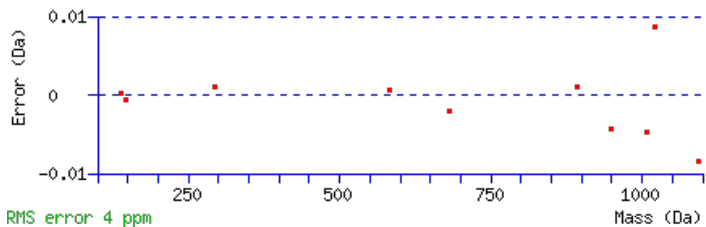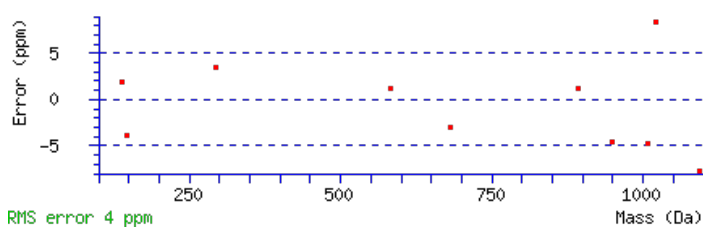

NCBI BLAST search of [YEFLNGRVQSTELCAGHLAGGTDSCQGDSSGGPLVCFEK](#)

(Parameters: blastp, nr protein database, expect=20000, no filter, PAM30)

Other BLAST [web gateways](#)

All matches to this query

| Score | Mr(calc)  | Delta  | Sequence                                                |
|-------|-----------|--------|---------------------------------------------------------|
| 17.9  | 4117.8092 | 0.0137 | <a href="#">YEFLNGRVQSTELCAGHLAGGTDSCQGDSSGGPLVCFEK</a> |
| 12.6  | 4116.8252 | 0.9977 | <a href="#">YEFLNGRVQSTELCAGHLAGGTDSCQGDSSGGPLVCFEK</a> |
| 12.5  | 4116.8252 | 0.9977 | <a href="#">YEFLNGRVQSTELCAGHLAGGTDSCQGDSSGGPLVCFEK</a> |
| 12.5  | 4116.8252 | 0.9977 | <a href="#">YEFLNGRVQSTELCAGHLAGGTDSCQGDSSGGPLVCFEK</a> |
| 12.4  | 4117.8092 | 0.0137 | <a href="#">YEFLNGRVQSTELCAGHLAGGTDSCQGDSSGGPLVCFEK</a> |
| 12.4  | 4117.8092 | 0.0137 | <a href="#">YEFLNGRVQSTELCAGHLAGGTDSCQGDSSGGPLVCFEK</a> |

Mascot: <http://www.matrixscience.com/>

# Mascot Search Results

## Peptide View

MS/MS Fragmentation of **YEFLNGRVQSTELCAGHLAGGTDSCQGDSSGGLVCFEK**

Found in **P00747** in **uni\_human\_nr**, PLMN\_HUMAN Plasminogen OS=Homo sapiens GN=PLG PE=1 SV=2

Match to Query 17111: 4117.822936 from(1030.463010,4+) intensity(752991.0625) rtinseconds(2874) scans(16785) index(12921)

Title: 130806\_HPL\_Human\_Plaque\_BR2\_TR2\_10\_Spectrum033842\_scans\_\_16785\_RTINSECONDS=2874

Data file E:\\RAW\\HumanPlaques\\imgf\\T\\1D\\T130806\_HPL\_Human\_Plaque\_BR2\_TR2\_10.mgf

Click mouse within plot area to zoom in by factor of two about that point

Or,  to  Da

Label all possible matches  Label matches used for scoring

Show Y-axis

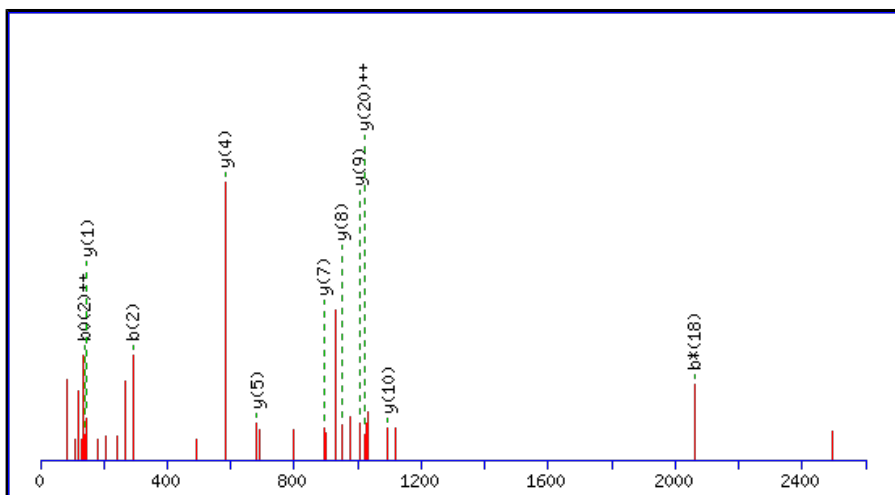

Monoisotopic mass of neutral peptide **Mr(calc):** 4116.8252

**Fixed modifications:** Carbamidomethyl (C) (apply to specified residues or termini only)

**Variable modifications:**

Q9 : Deamidated (NQ)

**Ions Score:** 18 **Expect:** 0.57

**Matches:** 11/432 fragment ions using 32 most intense peaks ([help](#))

| #  | b               | b <sup>++</sup> | b <sup>*</sup>   | b <sup>***</sup> | b <sup>0</sup> | b <sup>0++</sup> | Seq.     | y         | y <sup>++</sup> | y <sup>*</sup> | y <sup>***</sup> | y <sup>0</sup> | y <sup>0++</sup> | #         |
|----|-----------------|-----------------|------------------|------------------|----------------|------------------|----------|-----------|-----------------|----------------|------------------|----------------|------------------|-----------|
| 1  | 164.0706        | 82.5389         |                  |                  |                |                  | <b>Y</b> |           |                 |                |                  |                |                  | <b>38</b> |
| 2  | <b>293.1132</b> | 147.0602        |                  |                  | 275.1026       | <b>138.0550</b>  | <b>E</b> | 3954.7691 | 1977.8882       | 3937.7426      | 1969.3749        | 3936.7586      | 1968.8829        | <b>37</b> |
| 3  | 440.1816        | 220.5944        |                  |                  | 422.1710       | 211.5892         | <b>F</b> | 3825.7265 | 1913.3669       | 3808.7000      | 1904.8536        | 3807.7160      | 1904.3616        | <b>36</b> |
| 4  | 553.2657        | 277.1365        |                  |                  | 535.2551       | 268.1312         | <b>L</b> | 3678.6581 | 1839.8327       | 3661.6316      | 1831.3194        | 3660.6476      | 1830.8274        | <b>35</b> |
| 5  | 667.3086        | 334.1579        | 650.2821         | 325.6447         | 649.2980       | 325.1527         | <b>N</b> | 3565.5741 | 1783.2907       | 3548.5475      | 1774.7774        | 3547.5635      | 1774.2854        | <b>34</b> |
| 6  | 724.3301        | 362.6687        | 707.3035         | 354.1554         | 706.3195       | 353.6634         | <b>G</b> | 3451.5311 | 1726.2692       | 3434.5046      | 1717.7559        | 3433.5206      | 1717.2639        | <b>33</b> |
| 7  | 880.4312        | 440.7192        | 863.4046         | 432.2060         | 862.4206       | 431.7139         | <b>R</b> | 3394.5097 | 1697.7585       | 3377.4831      | 1689.2452        | 3376.4991      | 1688.7532        | <b>32</b> |
| 8  | 979.4996        | 490.2534        | 962.4730         | 481.7402         | 961.4890       | 481.2482         | <b>V</b> | 3238.4086 | 1619.7079       | 3221.3820      | 1611.1946        | 3220.3980      | 1610.7026        | <b>31</b> |
| 9  | 1108.5422       | 554.7747        | 1091.5156        | 546.2615         | 1090.5316      | 545.7694         | <b>Q</b> | 3139.3401 | 1570.1737       | 3122.3136      | 1561.6604        | 3121.3296      | 1561.1684        | <b>30</b> |
| 10 | 1195.5742       | 598.2907        | 1178.5477        | 589.7775         | 1177.5636      | 589.2855         | <b>S</b> | 3010.2976 | 1505.6524       | 2993.2710      | 1497.1391        | 2992.2870      | 1496.6471        | <b>29</b> |
| 11 | 1296.6219       | 648.8146        | 1279.5953        | 640.3013         | 1278.6113      | 639.8093         | <b>T</b> | 2923.2655 | 1462.1364       | 2906.2390      | 1453.6231        | 2905.2550      | 1453.1311        | <b>28</b> |
| 12 | 1425.6645       | 713.3359        | 1408.6379        | 704.8226         | 1407.6539      | 704.3306         | <b>E</b> | 2822.2178 | 1411.6126       | 2805.1913      | 1403.0993        | 2804.2073      | 1402.6073        | <b>27</b> |
| 13 | 1538.7486       | 769.8779        | 1521.7220        | 761.3646         | 1520.7380      | 760.8726         | <b>L</b> | 2693.1753 | 1347.0913       | 2676.1487      | 1338.5780        | 2675.1647      | 1338.0860        | <b>26</b> |
| 14 | 1698.7792       | 849.8932        | 1681.7527        | 841.3800         | 1680.7686      | 840.8880         | <b>C</b> | 2580.0912 | 1290.5492       | 2563.0646      | 1282.0360        | 2562.0806      | 1281.5439        | <b>25</b> |
| 15 | 1769.8163       | 885.4118        | 1752.7898        | 876.8985         | 1751.8057      | 876.4065         | <b>A</b> | 2420.0605 | 1210.5339       | 2403.0340      | 1202.0206        | 2402.0500      | 1201.5286        | <b>24</b> |
| 16 | 1826.8378       | 913.9225        | 1809.8112        | 905.4093         | 1808.8272      | 904.9172         | <b>G</b> | 2349.0234 | 1175.0153       | 2331.9969      | 1166.5021        | 2331.0129      | 1166.0101        | <b>23</b> |
| 17 | 1963.8967       | 982.4520        | 1946.8701        | 973.9387         | 1945.8861      | 973.4467         | <b>H</b> | 2292.0020 | 1146.5046       | 2274.9754      | 1137.9913        | 2273.9914      | 1137.4993        | <b>22</b> |
| 18 | 2076.9808       | 1038.9940       | <b>2059.9542</b> | 1030.4807        | 2058.9702      | 1029.9887        | <b>L</b> | 2154.9430 | 1077.9752       | 2137.9165      | 1069.4619        | 2136.9325      | 1068.9699        | <b>21</b> |

|    |           |           |           |           |           |           |   |           |           |           |           |           |           |    |
|----|-----------|-----------|-----------|-----------|-----------|-----------|---|-----------|-----------|-----------|-----------|-----------|-----------|----|
| 19 | 2148.0179 | 1074.5126 | 2130.9913 | 1065.9993 | 2130.0073 | 1065.5073 | A | 2041.8590 | 1021.4331 | 2024.8324 | 1012.9199 | 2023.8484 | 1012.4278 | 20 |
| 20 | 2205.0393 | 1103.0233 | 2188.0128 | 1094.5100 | 2187.0288 | 1094.0180 | G | 1970.8219 | 985.9146  | 1953.7953 | 977.4013  | 1952.8113 | 976.9093  | 19 |
| 21 | 2262.0608 | 1131.5340 | 2245.0342 | 1123.0208 | 2244.0502 | 1122.5288 | G | 1913.8004 | 957.4038  | 1896.7739 | 948.8906  | 1895.7898 | 948.3986  | 18 |
| 22 | 2363.1085 | 1182.0579 | 2346.0819 | 1173.5446 | 2345.0979 | 1173.0526 | T | 1856.7789 | 928.8931  | 1839.7524 | 920.3798  | 1838.7684 | 919.8878  | 17 |
| 23 | 2478.1354 | 1239.5713 | 2461.1089 | 1231.0581 | 2460.1249 | 1230.5661 | D | 1755.7313 | 878.3693  | 1738.7047 | 869.8560  | 1737.7207 | 869.3640  | 16 |
| 24 | 2565.1674 | 1283.0874 | 2548.1409 | 1274.5741 | 2547.1569 | 1274.0821 | S | 1640.7043 | 820.8558  | 1623.6778 | 812.3425  | 1622.6938 | 811.8505  | 15 |
| 25 | 2725.1981 | 1363.1027 | 2708.1715 | 1354.5894 | 2707.1875 | 1354.0974 | C | 1553.6723 | 777.3398  | 1536.6457 | 768.8265  | 1535.6617 | 768.3345  | 14 |
| 26 | 2853.2567 | 1427.1320 | 2836.2301 | 1418.6187 | 2835.2461 | 1418.1267 | Q | 1393.6416 | 697.3245  | 1376.6151 | 688.8112  | 1375.6311 | 688.3192  | 13 |
| 27 | 2910.2781 | 1455.6427 | 2893.2516 | 1447.1294 | 2892.2676 | 1446.6374 | G | 1265.5831 | 633.2952  | 1248.5565 | 624.7819  | 1247.5725 | 624.2899  | 12 |
| 28 | 3025.3051 | 1513.1562 | 3008.2785 | 1504.6429 | 3007.2945 | 1504.1509 | D | 1208.5616 | 604.7844  | 1191.5351 | 596.2712  | 1190.5510 | 595.7792  | 11 |
| 29 | 3112.3371 | 1556.6722 | 3095.3106 | 1548.1589 | 3094.3265 | 1547.6669 | S | 1093.5347 | 547.2710  | 1076.5081 | 538.7577  | 1075.5241 | 538.2657  | 10 |
| 30 | 3169.3586 | 1585.1829 | 3152.3320 | 1576.6696 | 3151.3480 | 1576.1776 | G | 1006.5026 | 503.7550  | 989.4761  | 495.2417  | 988.4921  | 494.7497  | 9  |
| 31 | 3226.3800 | 1613.6937 | 3209.3535 | 1605.1804 | 3208.3695 | 1604.6884 | G | 949.4812  | 475.2442  | 932.4546  | 466.7309  | 931.4706  | 466.2389  | 8  |
| 32 | 3323.4328 | 1662.2200 | 3306.4062 | 1653.7068 | 3305.4222 | 1653.2148 | P | 892.4597  | 446.7335  | 875.4332  | 438.2202  | 874.4491  | 437.7282  | 7  |
| 33 | 3436.5169 | 1718.7621 | 3419.4903 | 1710.2488 | 3418.5063 | 1709.7568 | L | 795.4069  | 398.2071  | 778.3804  | 389.6938  | 777.3964  | 389.2018  | 6  |
| 34 | 3535.5853 | 1768.2963 | 3518.5587 | 1759.7830 | 3517.5747 | 1759.2910 | V | 682.3229  | 341.6651  | 665.2963  | 333.1518  | 664.3123  | 332.6598  | 5  |
| 35 | 3695.6159 | 1848.3116 | 3678.5894 | 1839.7983 | 3677.6054 | 1839.3063 | C | 583.2545  | 292.1309  | 566.2279  | 283.6176  | 565.2439  | 283.1256  | 4  |
| 36 | 3842.6843 | 1921.8458 | 3825.6578 | 1913.3325 | 3824.6738 | 1912.8405 | F | 423.2238  | 212.1155  | 406.1973  | 203.6023  | 405.2132  | 203.1103  | 3  |
| 37 | 3971.7269 | 1986.3671 | 3954.7004 | 1977.8538 | 3953.7164 | 1977.3618 | E | 276.1554  | 138.5813  | 259.1288  | 130.0681  | 258.1448  | 129.5761  | 2  |
| 38 |           |           |           |           |           |           | K | 147.1128  | 74.0600   | 130.0863  | 65.5468   |           |           | 1  |

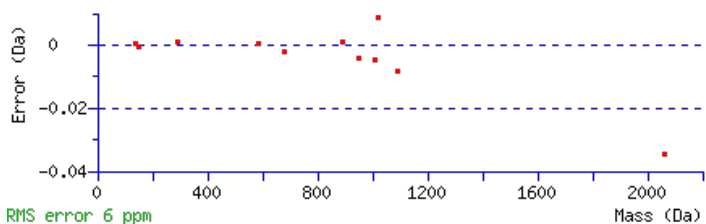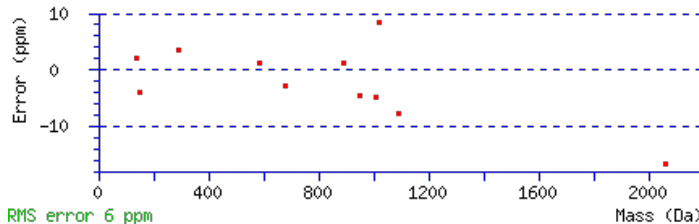

NCBI BLAST search of [YEFLNGRVQSTELCAGHLAGGTDSCQGDSSGGPLVCFEK](#)

(Parameters: blastp, nr protein database, expect=20000, no filter, PAM30)

Other BLAST [web gateways](#)

All matches to this query

| Score | Mr(calc)  | Delta  | Sequence                                                |
|-------|-----------|--------|---------------------------------------------------------|
| 17.9  | 4116.8252 | 0.9977 | <a href="#">YEFLNGRVQSTELCAGHLAGGTDSCQGDSSGGPLVCFEK</a> |
| 17.9  | 4116.8252 | 0.9977 | <a href="#">YEFLNGRVQSTELCAGHLAGGTDSCQGDSSGGPLVCFEK</a> |
| 17.9  | 4117.8092 | 0.0137 | <a href="#">YEFLNGRVQSTELCAGHLAGGTDSCQGDSSGGPLVCFEK</a> |
| 12.8  | 4117.8092 | 0.0137 | <a href="#">YEFLNGRVQSTELCAGHLAGGTDSCQGDSSGGPLVCFEK</a> |
| 12.8  | 4117.8092 | 0.0137 | <a href="#">YEFLNGRVQSTELCAGHLAGGTDSCQGDSSGGPLVCFEK</a> |
| 12.6  | 4116.8252 | 0.9977 | <a href="#">YEFLNGRVQSTELCAGHLAGGTDSCQGDSSGGPLVCFEK</a> |

Mascot: <http://www.matrixscience.com/>

# Mascot Search Results

## Peptide View

MS/MS Fragmentation of **SLLDLENGR**

Found in **O60437** in **uni\_human\_nr**, PEPL\_HUMAN Periplakin OS=Homo sapiens GN=PPL PE=1 SV=4

Match to Query 457: 1016.513888 from(509.264220,2+) intensity(463070.1250) rtinseconds(2004) scans(10725) index(7830)

Title: 130801\_HPL\_Human\_Plaque\_BR2\_TR1\_09\_Spectrum028642\_scans\_\_10725\_RTINSECONDS=2004

Data file E:\\RAW\\HumanPlaques\\mgf\\T\\1D\\T130801\_HPL\_Human\_Plaque\_BR2\_TR1\_09.mgf

Click mouse within plot area to zoom in by factor of two about that point

Or,  to  Da

Label all possible matches  Label matches used for scoring

Show Y-axis

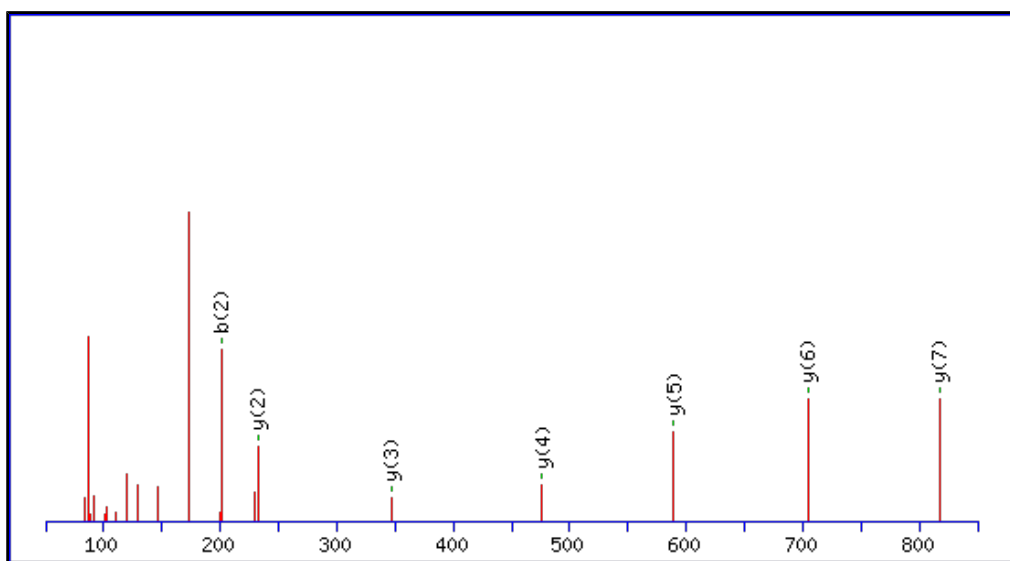

Monoisotopic mass of neutral peptide Mr(calc): 1016.5138

Fixed modifications: Carbamidomethyl (C) (apply to specified residues or termini only)

Variable modifications:

N7 : Deamidated (NQ)

Ions Score: 53 Expect: 0.00025

Matches : 7/78 fragment ions using 9 most intense peaks ([help](#))

| # | b               | b <sup>++</sup> | b <sup>*</sup> | b <sup>*++</sup> | b <sup>0</sup> | b <sup>0++</sup> | Seq. | y               | y <sup>++</sup> | y <sup>*</sup> | y <sup>*++</sup> | y <sup>0</sup> | y <sup>0++</sup> | # |
|---|-----------------|-----------------|----------------|------------------|----------------|------------------|------|-----------------|-----------------|----------------|------------------|----------------|------------------|---|
| 1 | 88.0393         | 44.5233         |                |                  | 70.0287        | 35.5180          | S    |                 |                 |                |                  |                |                  | 9 |
| 2 | <b>201.1234</b> | 101.0653        |                |                  | 183.1128       | 92.0600          | L    | 930.4891        | 465.7482        | 913.4625       | 457.2349         | 912.4785       | 456.7429         | 8 |
| 3 | 314.2074        | 157.6074        |                |                  | 296.1969       | 148.6021         | L    | <b>817.4050</b> | 409.2061        | 800.3785       | 400.6929         | 799.3945       | 400.2009         | 7 |
| 4 | 429.2344        | 215.1208        |                |                  | 411.2238       | 206.1155         | D    | <b>704.3210</b> | 352.6641        | 687.2944       | 344.1508         | 686.3104       | 343.6588         | 6 |
| 5 | 542.3184        | 271.6629        |                |                  | 524.3079       | 262.6576         | L    | <b>589.2940</b> | 295.1506        | 572.2675       | 286.6374         | 571.2835       | 286.1454         | 5 |
| 6 | 671.3610        | 336.1842        |                |                  | 653.3505       | 327.1789         | E    | <b>476.2100</b> | 238.6086        | 459.1834       | 230.0953         | 458.1994       | 229.6033         | 4 |
| 7 | 786.3880        | 393.6976        | 769.3614       | 385.1844         | 768.3774       | 384.6923         | N    | <b>347.1674</b> | 174.0873        | 330.1408       | 165.5740         |                |                  | 3 |
| 8 | 843.4094        | 422.2084        | 826.3829       | 413.6951         | 825.3989       | 413.2031         | G    | <b>232.1404</b> | 116.5738        | 215.1139       | 108.0606         |                |                  | 2 |
| 9 |                 |                 |                |                  |                |                  | R    | 175.1190        | 88.0631         | 158.0924       | 79.5498          |                |                  | 1 |

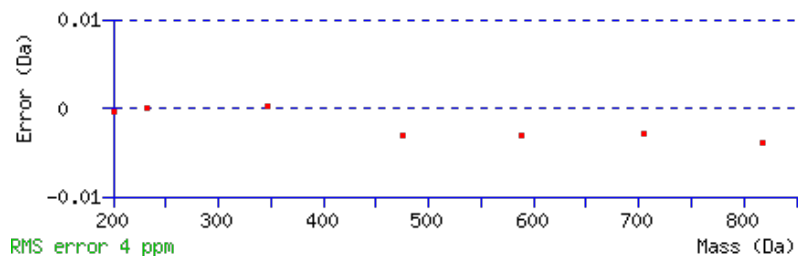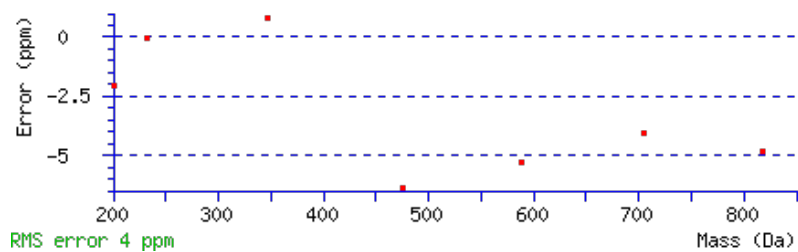

NCBI **BLAST** search of [SLLDLENGR](#)

(Parameters: blastp, nr protein database, expect=20000, no filter, PAM30)

Other BLAST [web gateways](#)

**All matches to this query**

| Score | Mr(calc)  | Delta  | Sequence                  |
|-------|-----------|--------|---------------------------|
| 53.3  | 1016.5138 | 0.0001 | <a href="#">SLLDLENGR</a> |
| 0.6   | 1016.5138 | 0.0001 | <a href="#">SLEDEIVGR</a> |

**Mascot:** <http://www.matrixscience.com/>

# Mascot Search Results

## Peptide View

MS/MS Fragmentation of **EVVEEAENGR**

Found in **P06454** in **uni\_human\_nr**, PTMA\_HUMAN Prothymosin alpha OS=Homo sapiens GN=PTMA PE=1 SV=2

Match to Query 1171: 1131.504848 from(566.759700,2+) intensity(840734.6250) rtinseconds(891) scans(3064) index(1096)

Title: 130801\_HPL\_Human\_Plaque\_BR2\_TR1\_19\_Spectrum019345\_scans\_\_3064\_RTINSECONDS=891

Data file E:\\RAW\\HumanPlaques\\mgf\\T\\1D\\T130801\_HPL\_Human\_Plaque\_BR2\_TR1\_19.mgf

Click mouse within plot area to zoom in by factor of two about that point

Or, to Da

Label all possible matches Label matches used for scoring

Show Y-axis

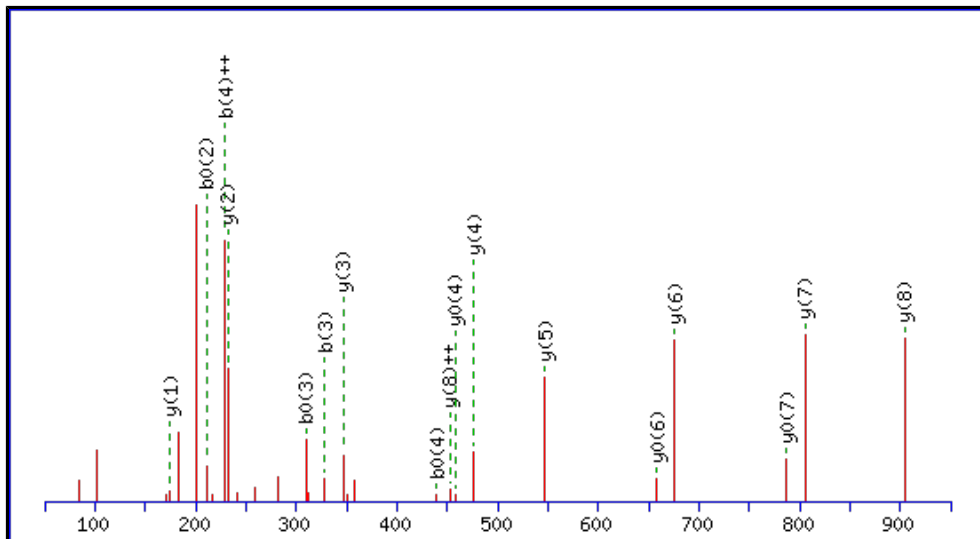

Monoisotopic mass of neutral peptide **Mr(calc)**: 1131.5044

**Fixed modifications**: Carbamidomethyl (C) (apply to specified residues or termini only)

**Variable modifications**:

N8 : Deamidated (NQ)

**Ions Score**: 72 **Expect**: 1.2e-006

**Matches** : 18/88 fragment ions using 22 most intense peaks ([help](#))

| #  | b               | b <sup>++</sup> | b <sup>*</sup> | b <sup>*++</sup> | b <sup>0</sup>  | b <sup>0++</sup> | Seq. | y               | y <sup>++</sup> | y <sup>*</sup> | y <sup>*++</sup> | y <sup>0</sup>  | y <sup>0++</sup> | #  |
|----|-----------------|-----------------|----------------|------------------|-----------------|------------------|------|-----------------|-----------------|----------------|------------------|-----------------|------------------|----|
| 1  | 130.0499        | 65.5286         |                |                  | 112.0393        | 56.5233          | E    |                 |                 |                |                  |                 |                  | 10 |
| 2  | <b>229.1183</b> | 115.0628        |                |                  | <b>211.1077</b> | 106.0575         | V    | 1003.4691       | 502.2382        | 986.4425       | 493.7249         | 985.4585        | 493.2329         | 9  |
| 3  | <b>328.1867</b> | 164.5970        |                |                  | <b>310.1761</b> | 155.5917         | V    | <b>904.4007</b> | <b>452.7040</b> | 887.3741       | 444.1907         | 886.3901        | 443.6987         | 8  |
| 4  | 457.2293        | <b>229.1183</b> |                |                  | <b>439.2187</b> | 220.1130         | E    | <b>805.3323</b> | 403.1698        | 788.3057       | 394.6565         | <b>787.3217</b> | 394.1645         | 7  |
| 5  | 586.2719        | 293.6396        |                |                  | 568.2613        | 284.6343         | E    | <b>676.2897</b> | 338.6485        | 659.2631       | 330.1352         | <b>658.2791</b> | 329.6432         | 6  |
| 6  | 657.3090        | 329.1581        |                |                  | 639.2984        | 320.1529         | A    | <b>547.2471</b> | 274.1272        | 530.2205       | 265.6139         | 529.2365        | 265.1219         | 5  |
| 7  | 786.3516        | 393.6794        |                |                  | 768.3410        | 384.6742         | E    | <b>476.2100</b> | 238.6086        | 459.1834       | 230.0953         | <b>458.1994</b> | 229.6033         | 4  |
| 8  | 901.3785        | 451.1929        | 884.3520       | 442.6796         | 883.3680        | 442.1876         | N    | <b>347.1674</b> | 174.0873        | 330.1408       | 165.5740         |                 |                  | 3  |
| 9  | 958.4000        | 479.7036        | 941.3734       | 471.1904         | 940.3894        | 470.6984         | G    | <b>232.1404</b> | 116.5738        | 215.1139       | 108.0606         |                 |                  | 2  |
| 10 |                 |                 |                |                  |                 |                  | R    | <b>175.1190</b> | 88.0631         | 158.0924       | 79.5498          |                 |                  | 1  |



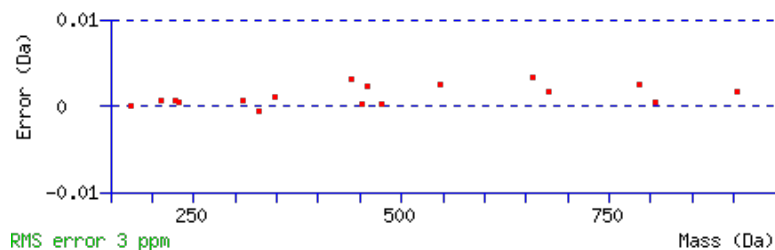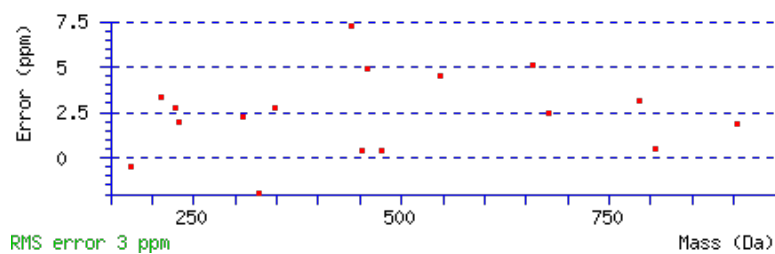

NCBI **BLAST** search of [EVVEEAENGR](#)  
 (Parameters: blastp, nr protein database, expect=20000, no filter, PAM30)  
 Other BLAST [web gateways](#)

**All matches to this query**

| Score | Mr(calc)  | Delta  | Sequence                   |
|-------|-----------|--------|----------------------------|
| 72.5  | 1131.5044 | 0.0005 | <a href="#">EVVEEAENGR</a> |
| 8.3   | 1131.5044 | 0.0005 | <a href="#">DIVNQVGDNR</a> |

**Mascot:** <http://www.matrixscience.com/>

# Mascot Search Results

## Peptide View

MS/MS Fragmentation of **EVVEEAENGR**

Found in **P06454** in **uni\_human\_nr**, PTMA\_HUMAN Prothymosin alpha OS=Homo sapiens GN=PTMA PE=1 SV=2

Match to Query 794: 1130.520488 from(566.267520,2+) intensity(1215421.5000) rtinseconds(888) scans(3149) index(1284)

Title: 130806\_HPL\_Human\_Plaque\_BR1\_TR2\_16\_Spectrum021305\_scans\_\_3149\_RTINSECONDS=888

Data file E:\\RAW\\HumanPlaques\\mgf\\T\\1D\\T130806\_HPL\_Human\_Plaque\_BR1\_TR2\_16.mgf

Click mouse within plot area to zoom in by factor of two about that point

Or,  to  Da

Label all possible matches  Label matches used for scoring

Show Y-axis

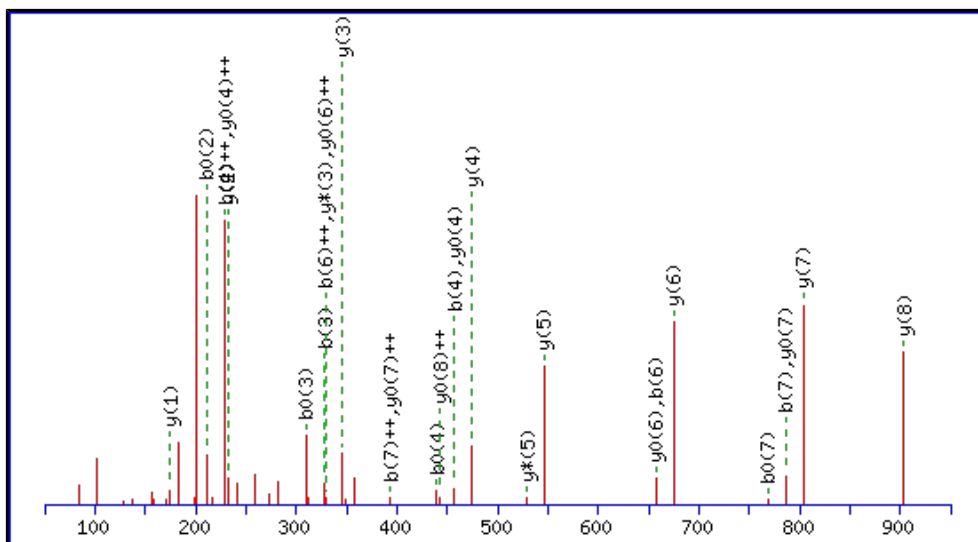

Monoisotopic mass of neutral peptide **Mr(calc):** 1130.5204

**Fixed modifications:** Carbamidomethyl (C) (apply to specified residues or termini only)

**Ions Score:** 69 **Expect:** 4.2e-006

**Matches :** 29/88 fragment ions using 29 most intense peaks ([help](#))

| #  | b               | b <sup>++</sup> | b <sup>*</sup> | b <sup>***</sup> | b <sup>0</sup>  | b <sup>0++</sup> | Seq. | y               | y <sup>++</sup> | y <sup>*</sup>  | y <sup>***</sup> | y <sup>0</sup>  | y <sup>0++</sup> | #  |
|----|-----------------|-----------------|----------------|------------------|-----------------|------------------|------|-----------------|-----------------|-----------------|------------------|-----------------|------------------|----|
| 1  | 130.0499        | 65.5286         |                |                  | 112.0393        | 56.5233          | E    |                 |                 |                 |                  |                 |                  | 10 |
| 2  | <b>229.1183</b> | 115.0628        |                |                  | <b>211.1077</b> | 106.0575         | V    | 1002.4851       | 501.7462        | 985.4585        | 493.2329         | 984.4745        | 492.7409         | 9  |
| 3  | <b>328.1867</b> | 164.5970        |                |                  | <b>310.1761</b> | 155.5917         | V    | <b>903.4167</b> | 452.2120        | 886.3901        | 443.6987         | 885.4061        | <b>443.2067</b>  | 8  |
| 4  | <b>457.2293</b> | <b>229.1183</b> |                |                  | <b>439.2187</b> | 220.1130         | E    | <b>804.3482</b> | 402.6778        | 787.3217        | 394.1645         | <b>786.3377</b> | <b>393.6725</b>  | 7  |
| 5  | 586.2719        | 293.6396        |                |                  | 568.2613        | 284.6343         | E    | <b>675.3056</b> | 338.1565        | 658.2791        | 329.6432         | <b>657.2951</b> | <b>329.1512</b>  | 6  |
| 6  | <b>657.3090</b> | <b>329.1581</b> |                |                  | 639.2984        | 320.1529         | A    | <b>546.2631</b> | 273.6352        | <b>529.2365</b> | 265.1219         | 528.2525        | 264.6299         | 5  |
| 7  | <b>786.3516</b> | <b>393.6794</b> |                |                  | <b>768.3410</b> | 384.6742         | E    | <b>475.2259</b> | 238.1166        | 458.1994        | 229.6033         | <b>457.2154</b> | <b>229.1113</b>  | 4  |
| 8  | 900.3945        | 450.7009        | 883.3680       | 442.1876         | 882.3840        | 441.6956         | N    | <b>346.1833</b> | 173.5953        | <b>329.1568</b> | 165.0820         |                 |                  | 3  |
| 9  | 957.4160        | 479.2116        | 940.3894       | 470.6984         | 939.4054        | 470.2063         | G    | <b>232.1404</b> | 116.5738        | 215.1139        | 108.0606         |                 |                  | 2  |
| 10 |                 |                 |                |                  |                 |                  | R    | <b>175.1190</b> | 88.0631         | 158.0924        | 79.5498          |                 |                  | 1  |

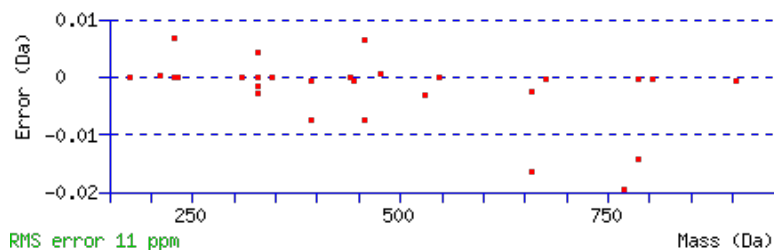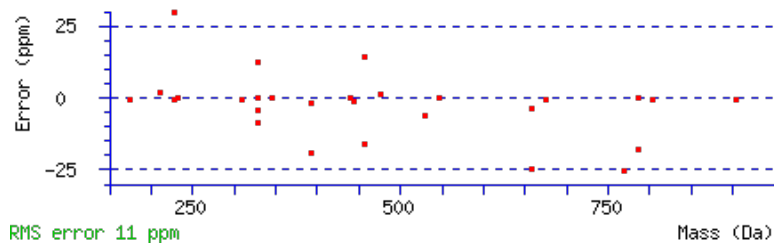

NCBI **BLAST** search of [EVVEEAENGR](#)

(Parameters: blastp, nr protein database, expect=20000, no filter, PAM30)

Other BLAST [web gateways](#)

**All matches to this query**

| Score | Mr(calc)  | Delta  | Sequence                   |
|-------|-----------|--------|----------------------------|
| 68.8  | 1130.5204 | 0.0001 | <a href="#">EVVEEAENGR</a> |
| 9.0   | 1130.5204 | 0.0001 | <a href="#">DIVNQVGDNR</a> |
| 9.0   | 1130.5204 | 0.0001 | <a href="#">DIVNQVGDNR</a> |
| 7.7   | 1130.5204 | 0.0001 | <a href="#">DIVNQVGDNR</a> |

**Mascot:** <http://www.matrixscience.com/>

# Mascot Search Results

## Peptide View

MS/MS Fragmentation of **KEVVVEAENGR**

Found in **P06454** in **uni\_human\_nr**, PTMA\_HUMAN Prothymosin alpha OS=Homo sapiens GN=PTMA PE=1 SV=2

Match to Query 1897: 1258.614942 from(420.545590,3+) intensity(119168.4063) rtinseconds(720) scans(2328) index(794)

Title: 130809\_HPL\_Human\_Plaque\_BR1\_TR3\_09\_Spectrum022583\_scans\_2328\_RTINSECONDS=720

Data file E:\RAW\HumanPlaques\mgf\T\1D\T130809\_HPL\_Human\_Plaque\_BR1\_TR3\_09.mgf

Click mouse within plot area to zoom in by factor of two about that point

Or,  to  Da

Label all possible matches  Label matches used for scoring

Show Y-axis

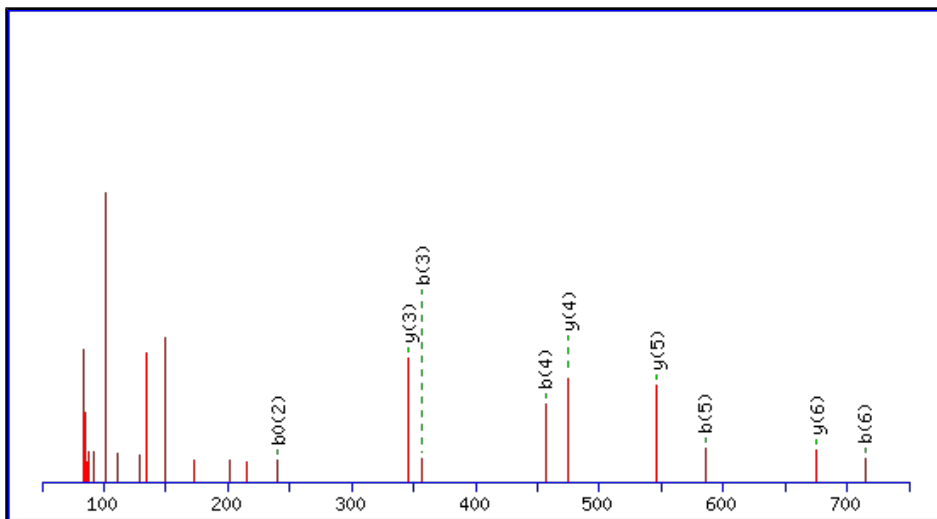

Monoisotopic mass of neutral peptide  $M_r(\text{calc})$ : 1258.6153

Fixed modifications: Carbamidomethyl (C) (apply to specified residues or termini only)

Ions Score: 35 Expect: 0.02

Matches : 9/112 fragment ions using 12 most intense peaks ([help](#))

| #  | b         | b <sup>++</sup> | b <sup>*</sup> | b <sup>*++</sup> | b <sup>0</sup> | b <sup>0++</sup> | Seq. | y         | y <sup>++</sup> | y <sup>*</sup> | y <sup>*++</sup> | y <sup>0</sup> | y <sup>0++</sup> | #  |
|----|-----------|-----------------|----------------|------------------|----------------|------------------|------|-----------|-----------------|----------------|------------------|----------------|------------------|----|
| 1  | 129.1022  | 65.0548         | 112.0757       | 56.5415          |                |                  | K    |           |                 |                |                  |                |                  | 11 |
| 2  | 258.1448  | 129.5761        | 241.1183       | 121.0628         | 240.1343       | 120.5708         | E    | 1131.5277 | 566.2675        | 1114.5011      | 557.7542         | 1113.5171      | 557.2622         | 10 |
| 3  | 357.2132  | 179.1103        | 340.1867       | 170.5970         | 339.2027       | 170.1050         | V    | 1002.4851 | 501.7462        | 985.4585       | 493.2329         | 984.4745       | 492.7409         | 9  |
| 4  | 456.2817  | 228.6445        | 439.2551       | 220.1312         | 438.2711       | 219.6392         | V    | 903.4167  | 452.2120        | 886.3901       | 443.6987         | 885.4061       | 443.2067         | 8  |
| 5  | 585.3243  | 293.1658        | 568.2977       | 284.6525         | 567.3137       | 284.1605         | E    | 804.3482  | 402.6778        | 787.3217       | 394.1645         | 786.3377       | 393.6725         | 7  |
| 6  | 714.3668  | 357.6871        | 697.3403       | 349.1738         | 696.3563       | 348.6818         | E    | 675.3056  | 338.1565        | 658.2791       | 329.6432         | 657.2951       | 329.1512         | 6  |
| 7  | 785.4040  | 393.2056        | 768.3774       | 384.6923         | 767.3934       | 384.2003         | A    | 546.2631  | 273.6352        | 529.2365       | 265.1219         | 528.2525       | 264.6299         | 5  |
| 8  | 914.4466  | 457.7269        | 897.4200       | 449.2136         | 896.4360       | 448.7216         | E    | 475.2259  | 238.1166        | 458.1994       | 229.6033         | 457.2154       | 229.1113         | 4  |
| 9  | 1028.4895 | 514.7484        | 1011.4629      | 506.2351         | 1010.4789      | 505.7431         | N    | 346.1833  | 173.5953        | 329.1568       | 165.0820         |                |                  | 3  |
| 10 | 1085.5109 | 543.2591        | 1068.4844      | 534.7458         | 1067.5004      | 534.2538         | G    | 232.1404  | 116.5738        | 215.1139       | 108.0606         |                |                  | 2  |
| 11 |           |                 |                |                  |                |                  | R    | 175.1190  | 88.0631         | 158.0924       | 79.5498          |                |                  | 1  |

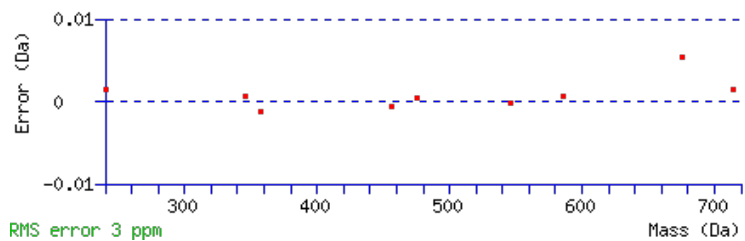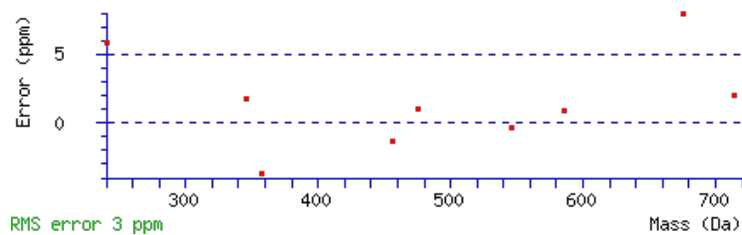

NCBI BLAST search of [KEVVEEAENGR](#)

(Parameters: blastp, nr protein database, expect=20000, no filter, PAM30)

Other BLAST [web gateways](#)

**All matches to this query**

| Score | Mr(calc)  | Delta   | Sequence                    |
|-------|-----------|---------|-----------------------------|
| 34.5  | 1258.6153 | -0.0004 | <a href="#">KEVVEEAENGR</a> |

Mascot: <http://www.matrixscience.com/>

# Mascot Search Results

## Peptide View

MS/MS Fragmentation of **KEDGGWEGQINGR**

Found in **Q96B97** in **uni\_human\_nr**, SH3K1\_HUMAN SH3 domain-containing kinase-binding protein 1 OS=Homo sapiens GN=SH3KBP1 PE=1 SV=2

Match to Query 4047: 1631.737572 from(544.919800,3+) intensity(345093.9375) rtinseconds(1960) scans(10641) index(7761)

Title: 130806\_HPL\_Human\_Plaque\_BR1\_TR2\_11\_Spectrum028797\_scans\_\_10641\_RTINSECONDS=1960

Data file E:\RAW\HumanPlaques\mgf\T\1D\T130806\_HPL\_Human\_Plaque\_BR1\_TR2\_11.mgf

Click mouse within plot area to zoom in by factor of two about that point

Or,  to  Da

Label all possible matches  Label matches used for scoring

Show Y-axis

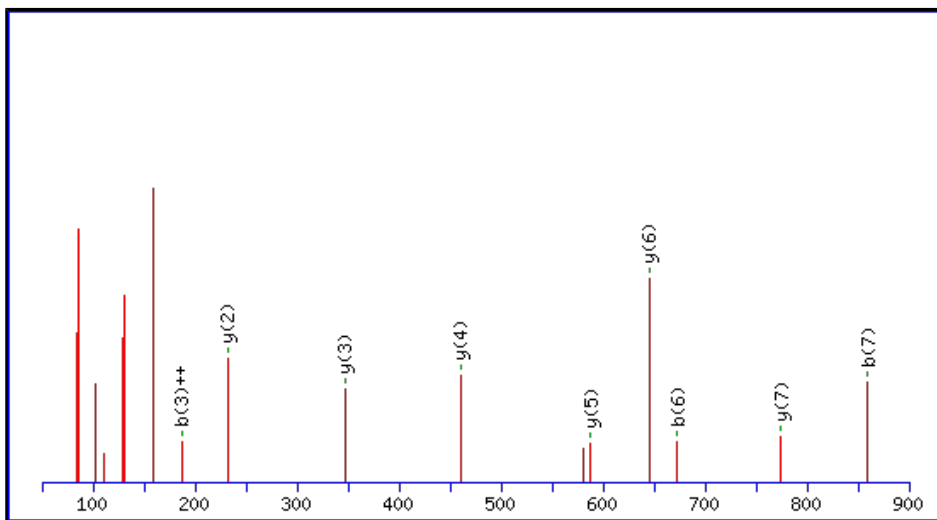

Monoisotopic mass of neutral peptide **Mr(calc):** 1631.7328

**Fixed modifications:** Carbamidomethyl (C) (apply to specified residues or termini only)

**Variable modifications:**

**N12** : Deamidated (NQ)

**Ions Score:** 41 **Expect:** 0.0031

**Matches :** 9/142 fragment ions using 13 most intense peaks ([help](#))

| #  | b               | b <sup>++</sup> | b <sup>*</sup> | b <sup>*++</sup> | b <sup>0</sup> | b <sup>0++</sup> | Seq.     | y               | y <sup>++</sup> | y <sup>*</sup> | y <sup>*++</sup> | y <sup>0</sup> | y <sup>0++</sup> | #         |
|----|-----------------|-----------------|----------------|------------------|----------------|------------------|----------|-----------------|-----------------|----------------|------------------|----------------|------------------|-----------|
| 1  | 129.1022        | 65.0548         | 112.0757       | 56.5415          |                |                  | <b>K</b> |                 |                 |                |                  |                |                  | <b>14</b> |
| 2  | 258.1448        | 129.5761        | 241.1183       | 121.0628         | 240.1343       | 120.5708         | <b>E</b> | 1504.6451       | 752.8262        | 1487.6186      | 744.3129         | 1486.6346      | 743.8209         | <b>13</b> |
| 3  | 373.1718        | <b>187.0895</b> | 356.1452       | 178.5763         | 355.1612       | 178.0842         | <b>D</b> | 1375.6026       | 688.3049        | 1358.5760      | 679.7916         | 1357.5920      | 679.2996         | <b>12</b> |
| 4  | 430.1932        | 215.6003        | 413.1667       | 207.0870         | 412.1827       | 206.5950         | <b>G</b> | 1260.5756       | 630.7914        | 1243.5491      | 622.2782         | 1242.5650      | 621.7862         | <b>11</b> |
| 5  | 487.2147        | 244.1110        | 470.1882       | 235.5977         | 469.2041       | 235.1057         | <b>G</b> | 1203.5541       | 602.2807        | 1186.5276      | 593.7674         | 1185.5436      | 593.2754         | <b>10</b> |
| 6  | <b>673.2940</b> | 337.1506        | 656.2675       | 328.6374         | 655.2835       | 328.1454         | <b>W</b> | 1146.5327       | 573.7700        | 1129.5061      | 565.2567         | 1128.5221      | 564.7647         | <b>9</b>  |
| 7  | <b>859.3733</b> | 430.1903        | 842.3468       | 421.6770         | 841.3628       | 421.1850         | <b>W</b> | 960.4534        | 480.7303        | 943.4268       | 472.2170         | 942.4428       | 471.7250         | <b>8</b>  |
| 8  | 988.4159        | 494.7116        | 971.3894       | 486.1983         | 970.4054       | 485.7063         | <b>E</b> | <b>774.3741</b> | 387.6907        | 757.3475       | 379.1774         | 756.3635       | 378.6854         | <b>7</b>  |
| 9  | 1045.4374       | 523.2223        | 1028.4108      | 514.7091         | 1027.4268      | 514.2170         | <b>G</b> | <b>645.3315</b> | 323.1694        | 628.3049       | 314.6561         |                |                  | <b>6</b>  |
| 10 | 1173.4960       | 587.2516        | 1156.4694      | 578.7383         | 1155.4854      | 578.2463         | <b>Q</b> | <b>588.3100</b> | 294.6586        | 571.2835       | 286.1454         |                |                  | <b>5</b>  |
| 11 | 1286.5800       | 643.7937        | 1269.5535      | 635.2804         | 1268.5695      | 634.7884         | <b>I</b> | <b>460.2514</b> | 230.6293        | 443.2249       | 222.1161         |                |                  | <b>4</b>  |
| 12 | 1401.6070       | 701.3071        | 1384.5804      | 692.7938         | 1383.5964      | 692.3018         | <b>N</b> | <b>347.1674</b> | 174.0873        | 330.1408       | 165.5740         |                |                  | <b>3</b>  |
| 13 | 1458.6284       | 729.8179        | 1441.6019      | 721.3046         | 1440.6179      | 720.8126         | <b>G</b> | <b>232.1404</b> | 116.5738        | 215.1139       | 108.0606         |                |                  | <b>2</b>  |
| 14 |                 |                 |                |                  |                |                  | <b>R</b> | 175.1190        | 88.0631         | 158.0924       | 79.5498          |                |                  | <b>1</b>  |

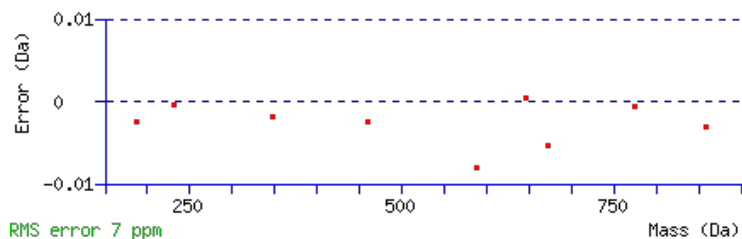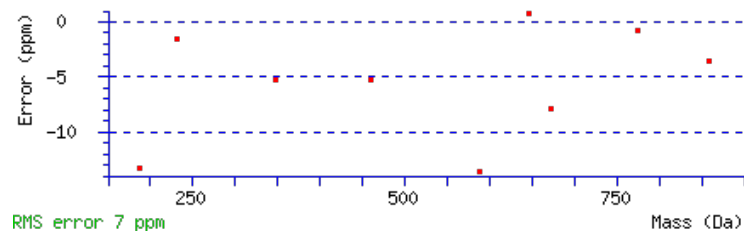

NCBI BLAST search of [KEDGGWEGQINGR](#)

(Parameters: blastp, nr protein database, expect=20000, no filter, PAM30)

Other BLAST [web gateways](#)

**All matches to this query**

| Score | Mr(calc)  | Delta  | Sequence                         | Site Analysis         |
|-------|-----------|--------|----------------------------------|-----------------------|
| 40.9  | 1631.7328 | 0.0048 | <a href="#">KEDGGWEGQINGR</a>    | Deamidated N12 98.96% |
| 21.1  | 1631.7328 | 0.0048 | <a href="#">KEDGGWEGQINGR</a>    | Deamidated Q10 1.04%  |
| 1.1   | 1629.7271 | 2.0105 | <a href="#">YFGSIDSSEAEAGAAR</a> |                       |

Mascot: <http://www.matrixscience.com/>

# Mascot Search Results

## Peptide View

MS/MS Fragmentation of **KEDGGWEGQINGR**

Found in **Q96B97** in **uni\_human\_nr**, SH3K1\_HUMAN SH3 domain-containing kinase-binding protein 1 OS=Homo sapiens GN=SH3KBP1 PE=1 SV=2

Match to Query 5173: 1630.750992 from(544.590940,3+) intensity(208488.5781) rtinseconds(1799) scans(10073) index(7566)

Title: 130809\_HPL\_Human\_Plaque\_BR2\_TR3\_06\_Spectrum029606\_scans\_\_10073\_RTINSECONDS=1799

Data file E:\RAW\HumanPlaques\mgf\T\1D\T130809\_HPL\_Human\_Plaque\_BR2\_TR3\_06.mgf

Click mouse within plot area to zoom in by factor of two about that point

Or,  to  Da

Label all possible matches  Label matches used for scoring

Show Y-axis

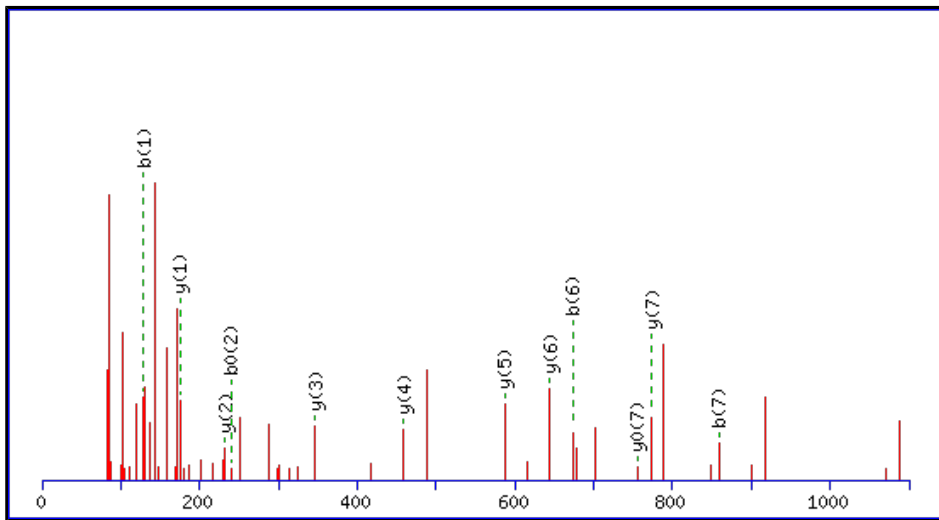

Monoisotopic mass of neutral peptide **Mr(calc)**: 1630.7488

**Fixed modifications**: Carbamidomethyl (C) (apply to specified residues or termini only)

**Ions Score**: 17 **Expect**: 0.82

**Matches** : 12/142 fragment ions using 43 most intense peaks ([help](#))

| #  | b               | b <sup>++</sup> | b <sup>*</sup> | b <sup>*++</sup> | b <sup>0</sup>  | b <sup>0++</sup> | Seq.     | y               | y <sup>++</sup> | y <sup>*</sup> | y <sup>*++</sup> | y <sup>0</sup>  | y <sup>0++</sup> | #         |
|----|-----------------|-----------------|----------------|------------------|-----------------|------------------|----------|-----------------|-----------------|----------------|------------------|-----------------|------------------|-----------|
| 1  | <b>129.1022</b> | 65.0548         | 112.0757       | 56.5415          |                 |                  | <b>K</b> |                 |                 |                |                  |                 |                  | <b>14</b> |
| 2  | 258.1448        | 129.5761        | 241.1183       | 121.0628         | <b>240.1343</b> | 120.5708         | <b>E</b> | 1503.6611       | 752.3342        | 1486.6346      | 743.8209         | 1485.6506       | 743.3289         | <b>13</b> |
| 3  | 373.1718        | 187.0895        | 356.1452       | 178.5763         | 355.1612        | 178.0842         | <b>D</b> | 1374.6185       | 687.8129        | 1357.5920      | 679.2996         | 1356.6080       | 678.8076         | <b>12</b> |
| 4  | 430.1932        | 215.6003        | 413.1667       | 207.0870         | 412.1827        | 206.5950         | <b>G</b> | 1259.5916       | 630.2994        | 1242.5650      | 621.7862         | 1241.5810       | 621.2942         | <b>11</b> |
| 5  | 487.2147        | 244.1110        | 470.1882       | 235.5977         | 469.2041        | 235.1057         | <b>G</b> | 1202.5701       | 601.7887        | 1185.5436      | 593.2754         | 1184.5596       | 592.7834         | <b>10</b> |
| 6  | <b>673.2940</b> | 337.1506        | 656.2675       | 328.6374         | 655.2835        | 328.1454         | <b>W</b> | 1145.5487       | 573.2780        | 1128.5221      | 564.7647         | 1127.5381       | 564.2727         | <b>9</b>  |
| 7  | <b>859.3733</b> | 430.1903        | 842.3468       | 421.6770         | 841.3628        | 421.1850         | <b>W</b> | 959.4694        | 480.2383        | 942.4428       | 471.7250         | 941.4588        | 471.2330         | <b>8</b>  |
| 8  | 988.4159        | 494.7116        | 971.3894       | 486.1983         | 970.4054        | 485.7063         | <b>E</b> | <b>773.3900</b> | 387.1987        | 756.3635       | 378.6854         | <b>755.3795</b> | 378.1934         | <b>7</b>  |
| 9  | 1045.4374       | 523.2223        | 1028.4108      | 514.7091         | 1027.4268       | 514.2170         | <b>G</b> | <b>644.3474</b> | 322.6774        | 627.3209       | 314.1641         |                 |                  | <b>6</b>  |
| 10 | 1173.4960       | 587.2516        | 1156.4694      | 578.7383         | 1155.4854       | 578.2463         | <b>Q</b> | <b>587.3260</b> | 294.1666        | 570.2994       | 285.6534         |                 |                  | <b>5</b>  |
| 11 | 1286.5800       | 643.7937        | 1269.5535      | 635.2804         | 1268.5695       | 634.7884         | <b>I</b> | <b>459.2674</b> | 230.1373        | 442.2409       | 221.6241         |                 |                  | <b>4</b>  |
| 12 | 1400.6230       | 700.8151        | 1383.5964      | 692.3018         | 1382.6124       | 691.8098         | <b>N</b> | <b>346.1833</b> | 173.5953        | 329.1568       | 165.0820         |                 |                  | <b>3</b>  |
| 13 | 1457.6444       | 729.3258        | 1440.6179      | 720.8126         | 1439.6339       | 720.3206         | <b>G</b> | <b>232.1404</b> | 116.5738        | 215.1139       | 108.0606         |                 |                  | <b>2</b>  |
| 14 |                 |                 |                |                  |                 |                  | <b>R</b> | <b>175.1190</b> | 88.0631         | 158.0924       | 79.5498          |                 |                  | <b>1</b>  |



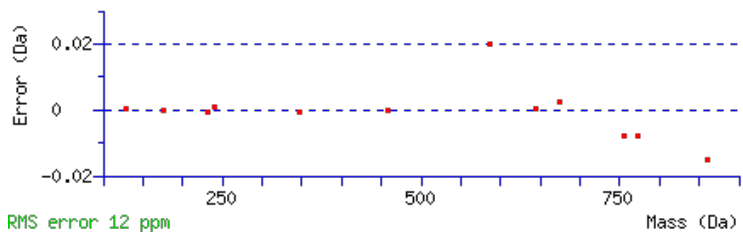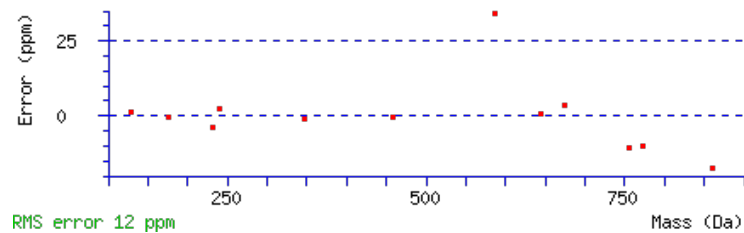

NCBI BLAST search of [KEDGGWEGQINGR](#)

(Parameters: blastp, nr protein database, expect=20000, no filter, PAM30)

Other BLAST [web gateways](#)

**All matches to this query**

| Score | Mr(calc)  | Delta  | Sequence                      |
|-------|-----------|--------|-------------------------------|
| 17.5  | 1630.7488 | 0.0022 | <a href="#">KEDGGWEGQINGR</a> |

Mascot: <http://www.matrixscience.com/>

# Mascot Search Results

## Peptide View

MS/MS Fragmentation of **FMNVPGGGAAAVMMTGYNNGR**

Found in **H0Y7S5** in **uni\_human\_nr**, H0Y7S5\_HUMAN SH3 and multiple ankyrin repeat domains protein 2 (Fragment) OS=Homo sapiens GN=SHANK2 PE=1 SV=1

Match to Query 8089: 2132.905842 from(711.975890,3+) intensity(355070.5000) rtinseconds(2625) scans(15442) index(11653)

Title: 130806\_HPL\_Human\_Plaque\_BR1\_TR2\_08\_Spectrum033345\_scans\_\_15442\_RTINSECONDS=2625

Data file E:\RAW\HumanPlaques\mgf\T\1D\T130806\_HPL\_Human\_Plaque\_BR1\_TR2\_08.mgf

Click mouse within plot area to zoom in by factor of two about that point

Or,  to  Da

Label all possible matches  Label matches used for scoring

Show Y-axis

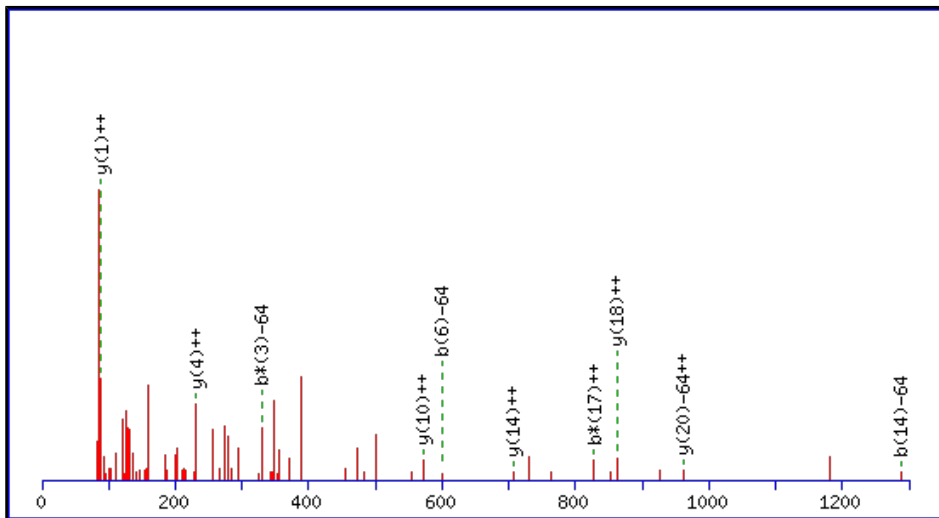

Monoisotopic mass of neutral peptide **Mr(calc)**: 2131.9125

**Fixed modifications:** Carbamidomethyl (C) (apply to specified residues or termini only)

**Variable modifications:**

**M2** : Oxidation (M), with neutral losses 63.9983(shown in table), 0.0000

**N3** : Deamidated (NQ)

**N19** : Deamidated (NQ)

**Ions Score:** 22 **Expect:** 0.13

**Matches** : 10/288 fragment ions using 19 most intense peaks ([help](#))

| #  | b         | b <sup>++</sup> | b <sup>*</sup> | b <sup>*++</sup> | b <sup>0</sup> | b <sup>0++</sup> | Seq. | y         | y <sup>++</sup> | y <sup>*</sup> | y <sup>*++</sup> | y <sup>0</sup> | y <sup>0++</sup> | #  |
|----|-----------|-----------------|----------------|------------------|----------------|------------------|------|-----------|-----------------|----------------|------------------|----------------|------------------|----|
| 1  | 148.0757  | 74.5415         |                |                  |                |                  | F    |           |                 |                |                  |                |                  | 21 |
| 2  | 231.1128  | 116.0600        |                |                  |                |                  | M    | 1921.8531 | 961.4302        | 1904.8266      | 952.9169         | 1903.8425      | 952.4249         | 20 |
| 3  | 346.1397  | 173.5735        | 329.1132       | 165.0602         |                |                  | N    | 1838.8160 | 919.9116        | 1821.7894      | 911.3984         | 1820.8054      | 910.9064         | 19 |
| 4  | 445.2082  | 223.1077        | 428.1816       | 214.5944         |                |                  | V    | 1723.7891 | 862.3982        | 1706.7625      | 853.8849         | 1705.7785      | 853.3929         | 18 |
| 5  | 542.2609  | 271.6341        | 525.2344       | 263.1208         |                |                  | P    | 1624.7206 | 812.8640        | 1607.6941      | 804.3507         | 1606.7101      | 803.8587         | 17 |
| 6  | 599.2824  | 300.1448        | 582.2558       | 291.6316         |                |                  | G    | 1527.6679 | 764.3376        | 1510.6413      | 755.8243         | 1509.6573      | 755.3323         | 16 |
| 7  | 656.3039  | 328.6556        | 639.2773       | 320.1423         |                |                  | G    | 1470.6464 | 735.8268        | 1453.6199      | 727.3136         | 1452.6358      | 726.8216         | 15 |
| 8  | 713.3253  | 357.1663        | 696.2988       | 348.6530         |                |                  | G    | 1413.6249 | 707.3161        | 1396.5984      | 698.8028         | 1395.6144      | 698.3108         | 14 |
| 9  | 784.3624  | 392.6849        | 767.3359       | 384.1716         |                |                  | A    | 1356.6035 | 678.8054        | 1339.5769      | 670.2921         | 1338.5929      | 669.8001         | 13 |
| 10 | 855.3995  | 428.2034        | 838.3730       | 419.6901         |                |                  | A    | 1285.5664 | 643.2868        | 1268.5398      | 634.7735         | 1267.5558      | 634.2815         | 12 |
| 11 | 926.4367  | 463.7220        | 909.4101       | 455.2087         |                |                  | A    | 1214.5293 | 607.7683        | 1197.5027      | 599.2550         | 1196.5187      | 598.7630         | 11 |
| 12 | 1025.5051 | 513.2562        | 1008.4785      | 504.7429         |                |                  | V    | 1143.4921 | 572.2497        | 1126.4656      | 563.7364         | 1125.4816      | 563.2444         | 10 |
| 13 | 1156.5456 | 578.7764        | 1139.5190      | 570.2631         |                |                  | M    | 1044.4237 | 522.7155        | 1027.3972      | 514.2022         | 1026.4132      | 513.7102         | 9  |

|    |           |          |           |          |           |          |   |          |          |          |          |          |          |   |
|----|-----------|----------|-----------|----------|-----------|----------|---|----------|----------|----------|----------|----------|----------|---|
| 14 | 1287.5860 | 644.2967 | 1270.5595 | 635.7834 |           |          | M | 913.3832 | 457.1953 | 896.3567 | 448.6820 | 895.3727 | 448.1900 | 8 |
| 15 | 1388.6337 | 694.8205 | 1371.6072 | 686.3072 | 1370.6232 | 685.8152 | T | 782.3428 | 391.6750 | 765.3162 | 383.1617 | 764.3322 | 382.6697 | 7 |
| 16 | 1445.6552 | 723.3312 | 1428.6286 | 714.8180 | 1427.6446 | 714.3259 | G | 681.2951 | 341.1512 | 664.2685 | 332.6379 |          |          | 6 |
| 17 | 1608.7185 | 804.8629 | 1591.6920 | 796.3496 | 1590.7080 | 795.8576 | Y | 624.2736 | 312.6404 | 607.2471 | 304.1272 |          |          | 5 |
| 18 | 1722.7614 | 861.8844 | 1705.7349 | 853.3711 | 1704.7509 | 852.8791 | N | 461.2103 | 231.1088 | 444.1837 | 222.5955 |          |          | 4 |
| 19 | 1837.7884 | 919.3978 | 1820.7618 | 910.8846 | 1819.7778 | 910.3925 | N | 347.1674 | 174.0873 | 330.1408 | 165.5740 |          |          | 3 |
| 20 | 1894.8099 | 947.9086 | 1877.7833 | 939.3953 | 1876.7993 | 938.9033 | G | 232.1404 | 116.5738 | 215.1139 | 108.0606 |          |          | 2 |
| 21 |           |          |           |          |           |          | R | 175.1190 | 88.0631  | 158.0924 | 79.5498  |          |          | 1 |

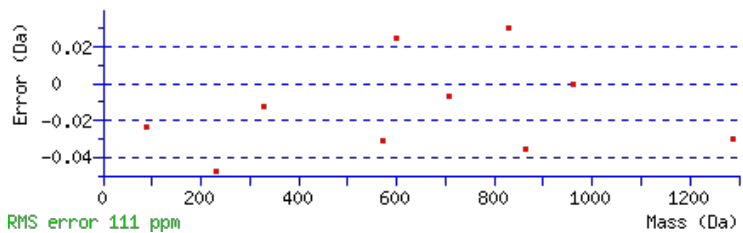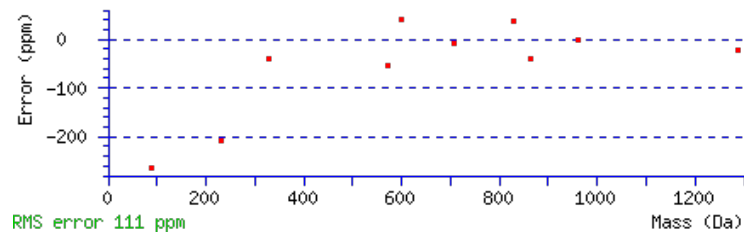

NCBI BLAST search of [FMNVPGGGAAAVMMMTGYNNGR](#)  
 (Parameters: blastp, nr protein database, expect=20000, no filter, PAM30)  
 Other BLAST [web gateways](#)

All matches to this query

| Score | Mr(calc)  | Delta  | Sequence                               |
|-------|-----------|--------|----------------------------------------|
| 22.1  | 2131.9125 | 0.9933 | <a href="#">FMNVPGGGAAAVMMMTGYNNGR</a> |
| 22.1  | 2131.9125 | 0.9933 | <a href="#">FMNVPGGGAAAVMMMTGYNNGR</a> |
| 8.9   | 2131.9125 | 0.9933 | <a href="#">YMNVPGGGAAAVMMMTGYNNGR</a> |
| 8.9   | 2131.9125 | 0.9933 | <a href="#">YMNVPGGGAAAVMMMTGYNNGR</a> |
| 8.5   | 2130.8955 | 2.0103 | <a href="#">MMNVPGGGAAAVMMMTGYNNGR</a> |
| 8.5   | 2130.8955 | 2.0103 | <a href="#">MMNVPGGGAAAVMMMTGYNNGR</a> |
| 8.5   | 2130.8955 | 2.0103 | <a href="#">MMNVPGGGAAAVMMMTGYNNGR</a> |
| 8.5   | 2130.8955 | 2.0103 | <a href="#">MMNVPGGGAAAVMMMTGYNNGR</a> |

Mascot: <http://www.matrixscience.com/>

# Mascot Search Results

## Peptide View

MS/MS Fragmentation of **GMNVPGGGAAAAMMTGYNNGR**

Found in **H0Y7S5** in **uni\_human\_nr**, H0Y7S5\_HUMAN SH3 and multiple ankyrin repeat domains protein 2 (Fragment) OS=Homo sapiens GN=SHANK2 PE=1 SV=1

Match to Query 7121: 2027.874848 from(1014.944700,2+) intensity(69315.4688) rtinseconds(3073) scans(17901) index(13654)

Title: 130809\_HPL\_Human\_Plaque\_BR2\_TR3\_13\_Spectrum034300\_scans\_\_17901\_RTINSECONDS=3073

Data file E:\RAW\HumanPlaques\mgf\T\1D\T130809\_HPL\_Human\_Plaque\_BR2\_TR3\_13.mgf

Click mouse within plot area to zoom in by factor of two about that point

Or,  to  Da

Label all possible matches  Label matches used for scoring

Show Y-axis

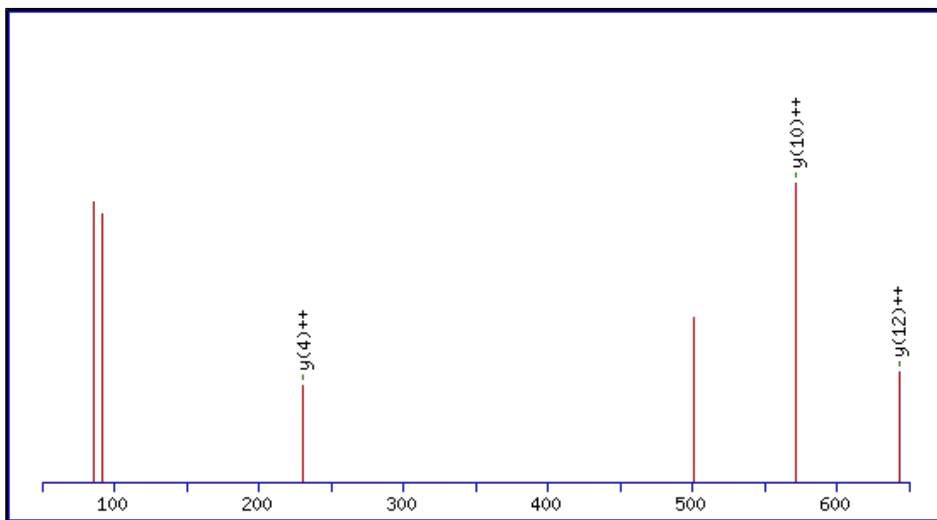

Monoisotopic mass of neutral peptide **Mr(calc)**: 2025.8707

**Fixed modifications:** Carbamidomethyl (C) (apply to specified residues or termini only)

**Variable modifications:**

**N3** : Deamidated (NQ)

**N19** : Deamidated (NQ)

**Ions Score:** 18 **Expect:** 0.41

**Matches** : 3/196 fragment ions using 4 most intense peaks ([help](#))

| #  | b         | b <sup>++</sup> | b <sup>*</sup> | b <sup>*++</sup> | b <sup>0</sup> | b <sup>0++</sup> | Seq. | y         | y <sup>++</sup> | y <sup>*</sup> | y <sup>*++</sup> | y <sup>0</sup> | y <sup>0++</sup> | #  |
|----|-----------|-----------------|----------------|------------------|----------------|------------------|------|-----------|-----------------|----------------|------------------|----------------|------------------|----|
| 1  | 58.0287   | 29.5180         |                |                  |                |                  | G    |           |                 |                |                  |                |                  | 21 |
| 2  | 189.0692  | 95.0383         |                |                  |                |                  | M    | 1969.8565 | 985.4319        | 1952.8299      | 976.9186         | 1951.8459      | 976.4266         | 20 |
| 3  | 304.0962  | 152.5517        | 287.0696       | 144.0384         |                |                  | N    | 1838.8160 | 919.9116        | 1821.7894      | 911.3984         | 1820.8054      | 910.9064         | 19 |
| 4  | 403.1646  | 202.0859        | 386.1380       | 193.5727         |                |                  | V    | 1723.7891 | 862.3982        | 1706.7625      | 853.8849         | 1705.7785      | 853.3929         | 18 |
| 5  | 500.2173  | 250.6123        | 483.1908       | 242.0990         |                |                  | P    | 1624.7206 | 812.8640        | 1607.6941      | 804.3507         | 1606.7101      | 803.8587         | 17 |
| 6  | 557.2388  | 279.1230        | 540.2123       | 270.6098         |                |                  | G    | 1527.6679 | 764.3376        | 1510.6413      | 755.8243         | 1509.6573      | 755.3323         | 16 |
| 7  | 614.2603  | 307.6338        | 597.2337       | 299.1205         |                |                  | G    | 1470.6464 | 735.8268        | 1453.6199      | 727.3136         | 1452.6358      | 726.8216         | 15 |
| 8  | 671.2817  | 336.1445        | 654.2552       | 327.6312         |                |                  | G    | 1413.6249 | 707.3161        | 1396.5984      | 698.8028         | 1395.6144      | 698.3108         | 14 |
| 9  | 742.3189  | 371.6631        | 725.2923       | 363.1498         |                |                  | A    | 1356.6035 | 678.8054        | 1339.5769      | 670.2921         | 1338.5929      | 669.8001         | 13 |
| 10 | 813.3560  | 407.1816        | 796.3294       | 398.6683         |                |                  | A    | 1285.5664 | 643.2868        | 1268.5398      | 634.7735         | 1267.5558      | 634.2815         | 12 |
| 11 | 884.3931  | 442.7002        | 867.3665       | 434.1869         |                |                  | A    | 1214.5293 | 607.7683        | 1197.5027      | 599.2550         | 1196.5187      | 598.7630         | 11 |
| 12 | 983.4615  | 492.2344        | 966.4349       | 483.7211         |                |                  | V    | 1143.4921 | 572.2497        | 1126.4656      | 563.7364         | 1125.4816      | 563.2444         | 10 |
| 13 | 1114.5020 | 557.7546        | 1097.4754      | 549.2414         |                |                  | M    | 1044.4237 | 522.7155        | 1027.3972      | 514.2022         | 1026.4132      | 513.7102         | 9  |
| 14 | 1245.5425 | 623.2749        | 1228.5159      | 614.7616         |                |                  | M    | 913.3832  | 457.1953        | 896.3567       | 448.6820         | 895.3727       | 448.1900         | 8  |

|    |           |          |           |          |           |          |   |          |          |          |          |          |          |   |
|----|-----------|----------|-----------|----------|-----------|----------|---|----------|----------|----------|----------|----------|----------|---|
| 15 | 1346.5901 | 673.7987 | 1329.5636 | 665.2854 | 1328.5796 | 664.7934 | T | 782.3428 | 391.6750 | 765.3162 | 383.1617 | 764.3322 | 382.6697 | 7 |
| 16 | 1403.6116 | 702.3094 | 1386.5851 | 693.7962 | 1385.6010 | 693.3042 | G | 681.2951 | 341.1512 | 664.2685 | 332.6379 |          |          | 6 |
| 17 | 1566.6749 | 783.8411 | 1549.6484 | 775.3278 | 1548.6644 | 774.8358 | Y | 624.2736 | 312.6404 | 607.2471 | 304.1272 |          |          | 5 |
| 18 | 1680.7179 | 840.8626 | 1663.6913 | 832.3493 | 1662.7073 | 831.8573 | N | 461.2103 | 231.1088 | 444.1837 | 222.5955 |          |          | 4 |
| 19 | 1795.7448 | 898.3760 | 1778.7183 | 889.8628 | 1777.7342 | 889.3708 | N | 347.1674 | 174.0873 | 330.1408 | 165.5740 |          |          | 3 |
| 20 | 1852.7663 | 926.8868 | 1835.7397 | 918.3735 | 1834.7557 | 917.8815 | G | 232.1404 | 116.5738 | 215.1139 | 108.0606 |          |          | 2 |
| 21 |           |          |           |          |           |          | R | 175.1190 | 88.0631  | 158.0924 | 79.5498  |          |          | 1 |

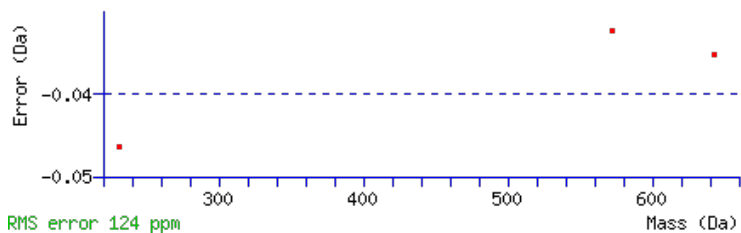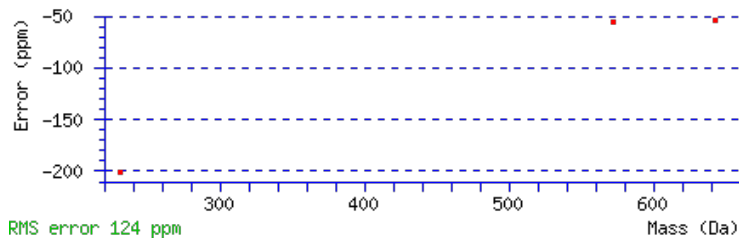

NCBI **BLAST** search of [GMNVPGGGAAAVMMTGYNNGR](#)  
 (Parameters: blastp, nr protein database, expect=20000, no filter, PAM30)  
 Other BLAST [web gateways](#)

**All matches to this query**

| Score | Mr(calc)  | Delta  | Sequence                              |
|-------|-----------|--------|---------------------------------------|
| 17.5  | 2025.8707 | 2.0042 | <a href="#">GMNVPGGGAAAVMMTGYNNGR</a> |
| 17.5  | 2025.8707 | 2.0042 | <a href="#">GMNVPGGGAAAVMMTGYNNGR</a> |
| 3.4   | 2025.8648 | 2.0100 | <a href="#">HFSEAMTCPCGWRPEK</a>      |

Mascot: <http://www.matrixscience.com/>

# Mascot Search Results

## Peptide View

MS/MS Fragmentation of **DIQMTQSPSSLSATVGDR**

Found in **P01613** in **uni\_human\_nr**, KV121\_HUMAN Ig kappa chain V-I region Ni OS=Homo sapiens PE=1 SV=1

Match to Query 6546: 1892.876808 from(947.445680,2+) intensity(79460.0547) rtinseconds(2299) scans(12408) index(9080)

Title: 130806\_HPL\_Human\_Plaque\_BR2\_TR2\_16\_Spectrum028722\_scans\_\_12408\_RTINSECONDS=2299

Data file E:\RAW\HumanPlaques\mgf\T\1D\T130806\_HPL\_Human\_Plaque\_BR2\_TR2\_16.mgf

Click mouse within plot area to zoom in by factor of two about that point

Or, to Da

Label all possible matches Label matches used for scoring

Show Y-axis

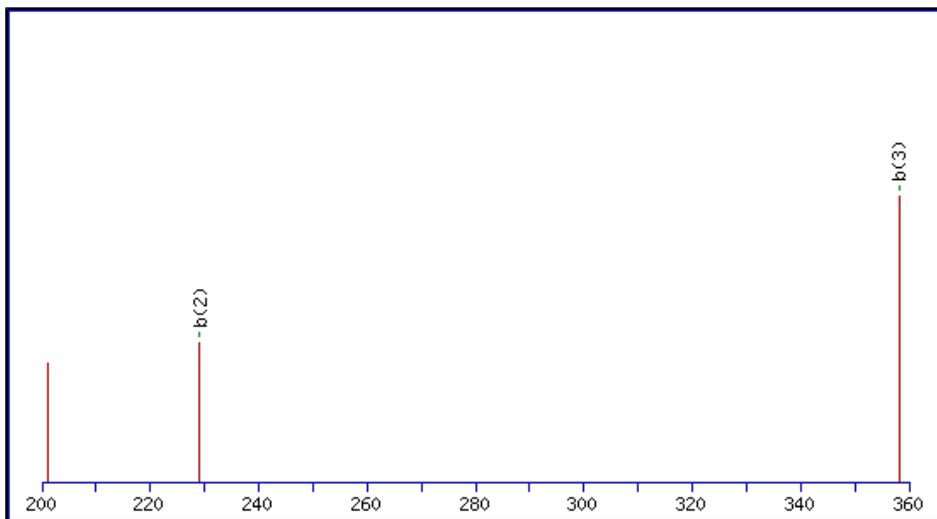

Monoisotopic mass of neutral peptide Mr(calc): 1892.8786

Fixed modifications: Carbamidomethyl (C) (apply to specified residues or termini only)

Variable modifications:

Q3 : Deamidated (NQ)

Ions Score: 16 Expect: 1.6

Matches : 2/198 fragment ions using 2 most intense peaks ([help](#))

| #  | b               | b <sup>++</sup> | b <sup>*</sup> | b <sup>*++</sup> | b <sup>0</sup> | b <sup>0++</sup> | Seq. | y         | y <sup>++</sup> | y <sup>*</sup> | y <sup>*++</sup> | y <sup>0</sup> | y <sup>0++</sup> | #  |
|----|-----------------|-----------------|----------------|------------------|----------------|------------------|------|-----------|-----------------|----------------|------------------|----------------|------------------|----|
| 1  | 116.0342        | 58.5207         |                |                  | 98.0237        | 49.5155          | D    |           |                 |                |                  |                |                  | 18 |
| 2  | <b>229.1183</b> | 115.0628        |                |                  | 211.1077       | 106.0575         | I    | 1778.8589 | 889.9331        | 1761.8324      | 881.4198         | 1760.8483      | 880.9278         | 17 |
| 3  | <b>358.1609</b> | 179.5841        | 341.1343       | 171.0708         | 340.1503       | 170.5788         | Q    | 1665.7748 | 833.3911        | 1648.7483      | 824.8778         | 1647.7643      | 824.3858         | 16 |
| 4  | 489.2014        | 245.1043        | 472.1748       | 236.5910         | 471.1908       | 236.0990         | M    | 1536.7322 | 768.8698        | 1519.7057      | 760.3565         | 1518.7217      | 759.8645         | 15 |
| 5  | 590.2490        | 295.6282        | 573.2225       | 287.1149         | 572.2385       | 286.6229         | T    | 1405.6918 | 703.3495        | 1388.6652      | 694.8362         | 1387.6812      | 694.3442         | 14 |
| 6  | 718.3076        | 359.6574        | 701.2811       | 351.1442         | 700.2971       | 350.6522         | Q    | 1304.6441 | 652.8257        | 1287.6175      | 644.3124         | 1286.6335      | 643.8204         | 13 |
| 7  | 805.3396        | 403.1735        | 788.3131       | 394.6602         | 787.3291       | 394.1682         | S    | 1176.5855 | 588.7964        | 1159.5590      | 580.2831         | 1158.5749      | 579.7911         | 12 |
| 8  | 902.3924        | 451.6998        | 885.3659       | 443.1866         | 884.3818       | 442.6946         | P    | 1089.5535 | 545.2804        | 1072.5269      | 536.7671         | 1071.5429      | 536.2751         | 11 |
| 9  | 989.4244        | 495.2159        | 972.3979       | 486.7026         | 971.4139       | 486.2106         | S    | 992.5007  | 496.7540        | 975.4742       | 488.2407         | 974.4901       | 487.7487         | 10 |
| 10 | 1076.4565       | 538.7319        | 1059.4299      | 530.2186         | 1058.4459      | 529.7266         | S    | 905.4687  | 453.2380        | 888.4421       | 444.7247         | 887.4581       | 444.2327         | 9  |
| 11 | 1189.5405       | 595.2739        | 1172.5140      | 586.7606         | 1171.5300      | 586.2686         | L    | 818.4367  | 409.7220        | 801.4101       | 401.2087         | 800.4261       | 400.7167         | 8  |
| 12 | 1276.5726       | 638.7899        | 1259.5460      | 630.2766         | 1258.5620      | 629.7846         | S    | 705.3526  | 353.1799        | 688.3260       | 344.6667         | 687.3420       | 344.1747         | 7  |
| 13 | 1347.6097       | 674.3085        | 1330.5831      | 665.7952         | 1329.5991      | 665.3032         | A    | 618.3206  | 309.6639        | 601.2940       | 301.1506         | 600.3100       | 300.6586         | 6  |
| 14 | 1448.6574       | 724.8323        | 1431.6308      | 716.3190         | 1430.6468      | 715.8270         | T    | 547.2835  | 274.1454        | 530.2569       | 265.6321         | 529.2729       | 265.1401         | 5  |
| 15 | 1547.7258       | 774.3665        | 1530.6992      | 765.8532         | 1529.7152      | 765.3612         | V    | 446.2358  | 223.6215        | 429.2092       | 215.1083         | 428.2252       | 214.6162         | 4  |

|    |           |          |           |          |           |          |   |          |          |          |          |          |          |   |
|----|-----------|----------|-----------|----------|-----------|----------|---|----------|----------|----------|----------|----------|----------|---|
| 16 | 1604.7472 | 802.8773 | 1587.7207 | 794.3640 | 1586.7367 | 793.8720 | G | 347.1674 | 174.0873 | 330.1408 | 165.5740 | 329.1568 | 165.0820 | 3 |
| 17 | 1719.7742 | 860.3907 | 1702.7476 | 851.8775 | 1701.7636 | 851.3854 | D | 290.1459 | 145.5766 | 273.1193 | 137.0633 | 272.1353 | 136.5713 | 2 |
| 18 |           |          |           |          |           |          | R | 175.1190 | 88.0631  | 158.0924 | 79.5498  |          |          | 1 |

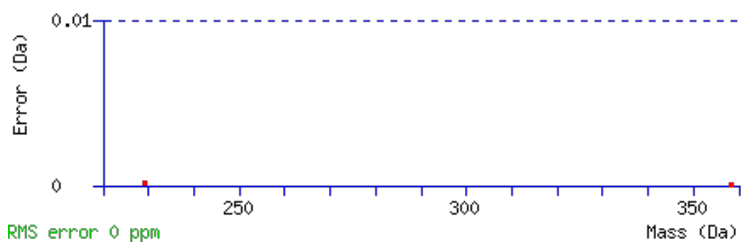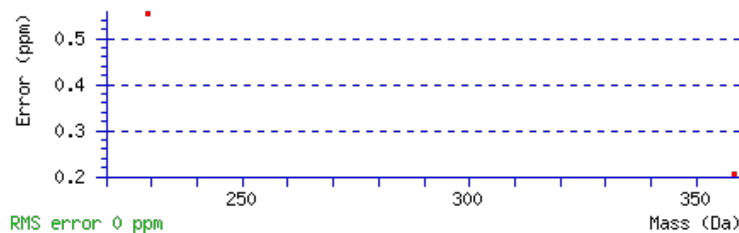

NCBI BLAST search of [DIQMTQSPSSLSATVGDR](#)

(Parameters: blastp, nr protein database, expect=20000, no filter, PAM30)

Other BLAST [web gateways](#)

**All matches to this query**

| Score | Mr(calc)  | Delta   | Sequence                           |
|-------|-----------|---------|------------------------------------|
| 15.8  | 1892.8786 | -0.0018 | <a href="#">DIQMTQSPSSLSATVGDR</a> |
| 15.8  | 1892.8786 | -0.0018 | <a href="#">DIQMTQSPSTLSASVGDR</a> |
| 15.8  | 1890.8642 | 2.0126  | <a href="#">DLQDRLSQMNGRWDR</a>    |
| 15.8  | 1890.8642 | 2.0126  | <a href="#">DLQDRLSQMNGRWDR</a>    |
| 15.8  | 1890.8629 | 2.0139  | <a href="#">IDEEEQCSEINREK</a>     |
| 15.8  | 1891.8721 | 1.0048  | <a href="#">NIEGATLTLQSECPETK</a>  |
| 15.8  | 1891.8761 | 1.0008  | <a href="#">NIQNFPDLIENPIMK</a>    |
| 15.8  | 1890.8694 | 2.0074  | <a href="#">QVEEAEEEEIDRLESSK</a>  |

Mascot: <http://www.matrixscience.com/>

# Mascot Search Results

## Peptide View

MS/MS Fragmentation of **KQNLDLLEQLQVANGR**

Found in **Q86TI0** in **uni\_human\_nr**, TBCD1\_HUMAN TBC1 domain family member 1 OS=Homo sapiens GN=TBC1D1 PE=1 SV=2

Match to Query 7266: 1843.938132 from(615.653320,3+) intensity(9126563.0000) rtinseconds(1139) scans(5220) index(3352)

Title: 130806\_HPL\_Human\_Plaque\_BR2\_TR2\_05\_Spectrum025863\_scans\_5220\_RTINSECONDS=1139

Data file E:\RAW\HumanPlaques\mgf\T\1D\T130806\_HPL\_Human\_Plaque\_BR2\_TR2\_05.mgf

Click mouse within plot area to zoom in by factor of two about that point

Or,  to  Da

Label all possible matches  Label matches used for scoring

Show Y-axis

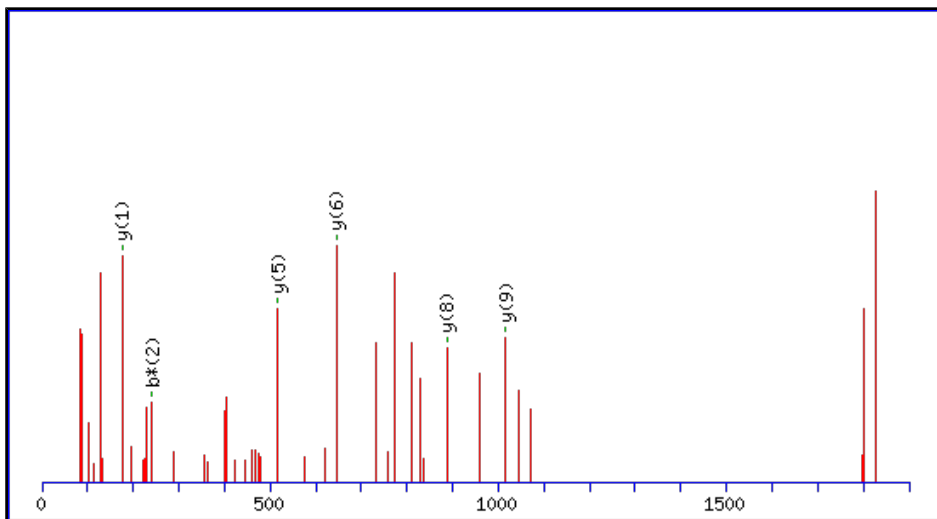

Monoisotopic mass of neutral peptide  $M_r(\text{calc})$ : 1841.9370

Fixed modifications: Carbamidomethyl (C) (apply to specified residues or termini only)

Variable modifications:

Q2 : Deamidated (NQ)

N3 : Deamidated (NQ)

Q11 : Deamidated (NQ)

N14 : Deamidated (NQ)

Ions Score: 22 Expect: 0.51

Matches : 6/156 fragment ions using 11 most intense peaks ([help](#))

| #  | b         | b <sup>++</sup> | b <sup>*</sup> | b <sup>*++</sup> | b <sup>0</sup> | b <sup>0++</sup> | Seq.     | y         | y <sup>++</sup> | y <sup>*</sup> | y <sup>*++</sup> | y <sup>0</sup> | y <sup>0++</sup> | #  |
|----|-----------|-----------------|----------------|------------------|----------------|------------------|----------|-----------|-----------------|----------------|------------------|----------------|------------------|----|
| 1  | 129.1022  | 65.0548         | 112.0757       | 56.5415          |                |                  | <b>K</b> |           |                 |                |                  |                |                  | 16 |
| 2  | 258.1448  | 129.5761        | 241.1183       | 121.0628         |                |                  | <b>Q</b> | 1714.8494 | 857.9283        | 1697.8228      | 849.4151         | 1696.8388      | 848.9230         | 15 |
| 3  | 373.1718  | 187.0895        | 356.1452       | 178.5763         |                |                  | <b>N</b> | 1585.8068 | 793.4070        | 1568.7802      | 784.8938         | 1567.7962      | 784.4018         | 14 |
| 4  | 486.2558  | 243.6316        | 469.2293       | 235.1183         |                |                  | <b>L</b> | 1470.7799 | 735.8936        | 1453.7533      | 727.3803         | 1452.7693      | 726.8883         | 13 |
| 5  | 601.2828  | 301.1450        | 584.2562       | 292.6318         | 583.2722       | 292.1397         | <b>D</b> | 1357.6958 | 679.3515        | 1340.6692      | 670.8383         | 1339.6852      | 670.3462         | 12 |
| 6  | 714.3668  | 357.6871        | 697.3403       | 349.1738         | 696.3563       | 348.6818         | <b>L</b> | 1242.6688 | 621.8381        | 1225.6423      | 613.3248         | 1224.6583      | 612.8328         | 11 |
| 7  | 827.4509  | 414.2291        | 810.4244       | 405.7158         | 809.4403       | 405.2238         | <b>L</b> | 1129.5848 | 565.2960        | 1112.5582      | 556.7828         | 1111.5742      | 556.2907         | 10 |
| 8  | 956.4935  | 478.7504        | 939.4670       | 470.2371         | 938.4829       | 469.7451         | <b>E</b> | 1016.5007 | 508.7540        | 999.4742       | 500.2407         | 998.4902       | 499.7487         | 9  |
| 9  | 1084.5521 | 542.7797        | 1067.5255      | 534.2664         | 1066.5415      | 533.7744         | <b>Q</b> | 887.4581  | 444.2327        | 870.4316       | 435.7194         |                |                  | 8  |
| 10 | 1197.6361 | 599.3217        | 1180.6096      | 590.8084         | 1179.6256      | 590.3164         | <b>L</b> | 759.3995  | 380.2034        | 742.3730       | 371.6901         |                |                  | 7  |
| 11 | 1326.6787 | 663.8430        | 1309.6522      | 655.3297         | 1308.6682      | 654.8377         | <b>Q</b> | 646.3155  | 323.6614        | 629.2889       | 315.1481         |                |                  | 6  |
| 12 | 1425.7472 | 713.3772        | 1408.7206      | 704.8639         | 1407.7366      | 704.3719         | <b>V</b> | 517.2729  | 259.1401        | 500.2463       | 250.6268         |                |                  | 5  |
| 13 | 1496.7843 | 748.8958        | 1479.7577      | 740.3825         | 1478.7737      | 739.8905         | <b>A</b> | 418.2045  | 209.6059        | 401.1779       | 201.0926         |                |                  | 4  |
| 14 | 1611.8112 | 806.4092        | 1594.7847      | 797.8960         | 1593.8006      | 797.4040         | <b>N</b> | 347.1674  | 174.0873        | 330.1408       | 165.5740         |                |                  | 3  |



|    |           |          |           |          |           |          |   |                 |          |          |          |  |  |   |
|----|-----------|----------|-----------|----------|-----------|----------|---|-----------------|----------|----------|----------|--|--|---|
| 15 | 1668.8327 | 834.9200 | 1651.8061 | 826.4067 | 1650.8221 | 825.9147 | G | 232.1404        | 116.5738 | 215.1139 | 108.0606 |  |  | 2 |
| 16 |           |          |           |          |           |          | R | <b>175.1190</b> | 88.0631  | 158.0924 | 79.5498  |  |  | 1 |

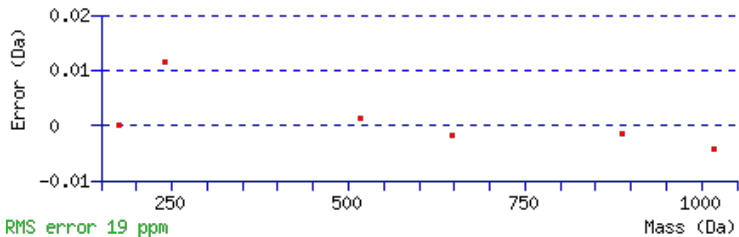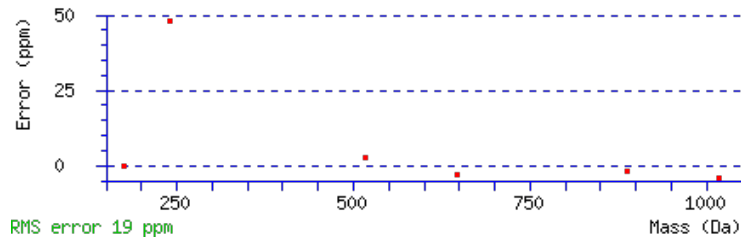

NCBI BLAST search of [KQNLDLLEQLQVANGR](#)

(Parameters: blastp, nr protein database, expect=20000, no filter, PAM30)

Other BLAST [web gateways](#)

All matches to this query

| Score | Mr(calc)  | Delta   | Sequence                            |
|-------|-----------|---------|-------------------------------------|
| 22.0  | 1841.9370 | 2.0011  | <a href="#">KQNLDLLEQLQVANGR</a>    |
| 11.7  | 1841.9370 | 2.0011  | <a href="#">KQNLDLLEQLQVANGR</a>    |
| 5.8   | 1842.9370 | 1.0012  | <a href="#">MRLEQDLKNQALDNR</a>     |
| 3.7   | 1843.9462 | -0.0080 | <a href="#">MIKETLPNVRVANDAR</a>    |
| 2.8   | 1841.9370 | 2.0011  | <a href="#">KQNLDLLEQLQVANGR</a>    |
| 2.6   | 1843.9316 | 0.0066  | <a href="#">QQFLEQSLOPGLOVAR</a>    |
| 2.0   | 1841.9370 | 2.0011  | <a href="#">KQNLDLLEQLQVANGR</a>    |
| 2.0   | 1843.9428 | -0.0047 | <a href="#">ANISVAEAPSAFAVLGDGR</a> |
| 1.1   | 1841.9370 | 2.0011  | <a href="#">KQNLDLLEQLQVANGR</a>    |
| 1.0   | 1841.9384 | 1.9997  | <a href="#">SLERDQVQLGLDWQR</a>     |

Mascot: <http://www.matrixscience.com/>

# Mascot Search Results

## Peptide View

MS/MS Fragmentation of **LKVEGYSGTAGDSMAYHNGR**

Found in **P24821** in **uni\_human\_nr**, TENA\_HUMAN Tenascin OS=Homo sapiens GN=TNC PE=1 SV=3

Match to Query 10463: 2127.961092 from(710.327640,3+) intensity(5838764.0000) rtinseconds(1108) scans(4724) index(2724)

Title: 130809\_HPL\_Human\_Plaque\_BR1\_TR3\_03\_Spectrum026011\_scans\_4724\_RTINSECONDS=1108

Data file E:\RAW\HumanPlaques\mgf\T1\ID\T130809\_HPL\_Human\_Plaque\_BR1\_TR3\_03.mgf

Click mouse within plot area to zoom in by factor of two about that point

Or,  to  Da

Label all possible matches  Label matches used for scoring

Show Y-axis

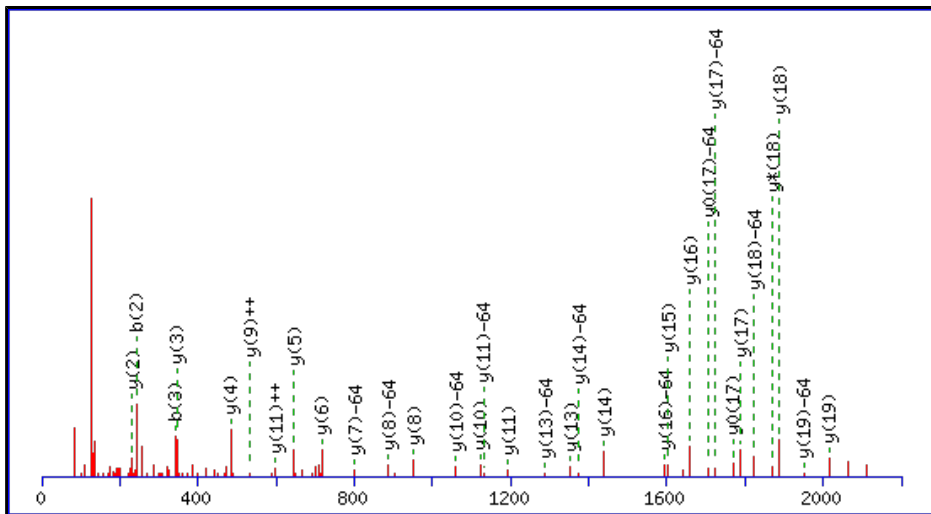

Monoisotopic mass of neutral peptide Mr(calc): 2127.9644

Fixed modifications: Carbamidomethyl (C) (apply to specified residues or termini only)

Variable modifications:

M14 : Oxidation (M), with neutral losses 0.0000(shown in table), 63.9983

Ions Score: 130 Expect: 5.5e-012

Matches : 32/318 fragment ions using 47 most intense peaks ([help](#))

| #  | b               | b <sup>++</sup> | b <sup>*</sup> | b <sup>*++</sup> | b <sup>0</sup> | b <sup>0++</sup> | Seq. | y                | y <sup>++</sup> | y <sup>*</sup>   | y <sup>*++</sup> | y <sup>0</sup>   | y <sup>0++</sup> | #  |
|----|-----------------|-----------------|----------------|------------------|----------------|------------------|------|------------------|-----------------|------------------|------------------|------------------|------------------|----|
| 1  | 114.0913        | 57.5493         |                |                  |                |                  | L    |                  |                 |                  |                  |                  |                  | 20 |
| 2  | <b>242.1863</b> | 121.5968        | 225.1598       | 113.0835         |                |                  | K    | <b>2015.8876</b> | 1008.4474       | 1998.8610        | 999.9342         | 1997.8770        | 999.4421         | 19 |
| 3  | <b>341.2547</b> | 171.1310        | 324.2282       | 162.6177         |                |                  | V    | <b>1887.7926</b> | 944.3999        | <b>1870.7661</b> | 935.8867         | 1869.7821        | 935.3947         | 18 |
| 4  | 470.2973        | 235.6523        | 453.2708       | 227.1390         | 452.2867       | 226.6470         | E    | <b>1788.7242</b> | 894.8657        | 1771.6977        | 886.3525         | <b>1770.7136</b> | 885.8605         | 17 |
| 5  | 527.3188        | 264.1630        | 510.2922       | 255.6498         | 509.3082       | 255.1577         | G    | <b>1659.6816</b> | 830.3444        | 1642.6551        | 821.8312         | 1641.6710        | 821.3392         | 16 |
| 6  | 690.3821        | 345.6947        | 673.3556       | 337.1814         | 672.3715       | 336.6894         | Y    | <b>1602.6601</b> | 801.8337        | 1585.6336        | 793.3204         | 1584.6496        | 792.8284         | 15 |
| 7  | 777.4141        | 389.2107        | 760.3876       | 380.6974         | 759.4036       | 380.2054         | S    | <b>1439.5968</b> | 720.3020        | 1422.5703        | 711.7888         | 1421.5863        | 711.2968         | 14 |
| 8  | 834.4356        | 417.7214        | 817.4090       | 409.2082         | 816.4250       | 408.7162         | G    | <b>1352.5648</b> | 676.7860        | 1335.5382        | 668.2728         | 1334.5542        | 667.7808         | 13 |
| 9  | 935.4833        | 468.2453        | 918.4567       | 459.7320         | 917.4727       | 459.2400         | T    | 1295.5433        | 648.2753        | 1278.5168        | 639.7620         | 1277.5328        | 639.2700         | 12 |
| 10 | 1006.5204       | 503.7638        | 989.4938       | 495.2506         | 988.5098       | 494.7585         | A    | <b>1194.4956</b> | <b>597.7515</b> | 1177.4691        | 589.2382         | 1176.4851        | 588.7462         | 11 |
| 11 | 1063.5419       | 532.2746        | 1046.5153      | 523.7613         | 1045.5313      | 523.2693         | G    | <b>1123.4585</b> | 562.2329        | 1106.4320        | 553.7196         | 1105.4480        | 553.2276         | 10 |
| 12 | 1178.5688       | 589.7880        | 1161.5422      | 581.2748         | 1160.5582      | 580.7828         | D    | 1066.4371        | <b>533.7222</b> | 1049.4105        | 525.2089         | 1048.4265        | 524.7169         | 9  |
| 13 | 1265.6008       | 633.3040        | 1248.5743      | 624.7908         | 1247.5903      | 624.2988         | S    | <b>951.4101</b>  | 476.2087        | 934.3836         | 467.6954         | 933.3996         | 467.2034         | 8  |
| 14 | 1412.6362       | 706.8217        | 1395.6097      | 698.3085         | 1394.6257      | 697.8165         | M    | 864.3781         | 432.6927        | 847.3515         | 424.1794         |                  |                  | 7  |
| 15 | 1483.6733       | 742.3403        | 1466.6468      | 733.8270         | 1465.6628      | 733.3350         | A    | <b>717.3427</b>  | 359.1750        | 700.3161         | 350.6617         |                  |                  | 6  |
| 16 | 1646.7367       | 823.8720        | 1629.7101      | 815.3587         | 1628.7261      | 814.8667         | Y    | <b>646.3056</b>  | 323.6564        | 629.2790         | 315.1432         |                  |                  | 5  |

|    |           |          |           |          |           |          |   |          |          |          |          |  |  |   |
|----|-----------|----------|-----------|----------|-----------|----------|---|----------|----------|----------|----------|--|--|---|
| 17 | 1783.7956 | 892.4014 | 1766.7690 | 883.8882 | 1765.7850 | 883.3961 | H | 483.2423 | 242.1248 | 466.2157 | 233.6115 |  |  | 4 |
| 18 | 1897.8385 | 949.4229 | 1880.8120 | 940.9096 | 1879.8279 | 940.4176 | N | 346.1833 | 173.5953 | 329.1568 | 165.0820 |  |  | 3 |
| 19 | 1954.8600 | 977.9336 | 1937.8334 | 969.4203 | 1936.8494 | 968.9283 | G | 232.1404 | 116.5738 | 215.1139 | 108.0606 |  |  | 2 |
| 20 |           |          |           |          |           |          | R | 175.1190 | 88.0631  | 158.0924 | 79.5498  |  |  | 1 |

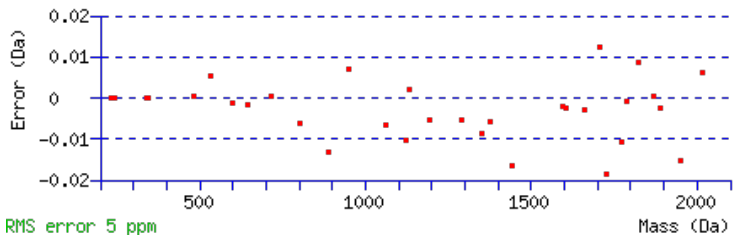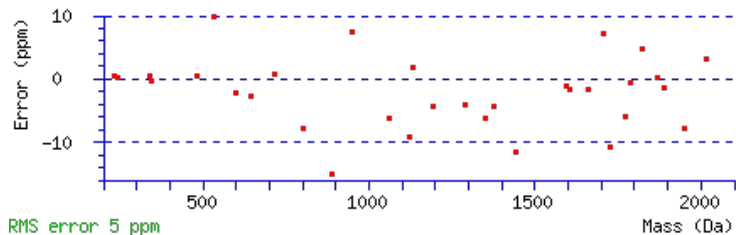

NCBI BLAST search of [LKVEGYSGTAGDSMAYHNGR](#)  
 (Parameters: blastp, nr protein database, expect=20000, no filter, PAM30)

Other BLAST [web gateways](#)

All matches to this query

| Score | Mr(calc)  | Delta   | Sequence                             |
|-------|-----------|---------|--------------------------------------|
| 129.8 | 2127.9644 | -0.0033 | <a href="#">LKVEGYSGTAGDSMAYHNGR</a> |

Mascot: <http://www.matrixscience.com/>

# Mascot Search Results

## Peptide View

MS/MS Fragmentation of **LKVEGYSGTAGDSMAYHNGR**

Found in **P24821** in **uni\_human\_nr**, TENA\_HUMAN Tenascin OS=Homo sapiens GN=TNC PE=1 SV=3

Match to Query 11122: 2127.963336 from(532.998110,4+) intensity(8622274.0000) rtinseconds(1101) scans(4214) index(2107)

Title: 130801\_HPL\_Human\_Plaque\_BR2\_TR1\_02\_Spectrum026262\_scans\_\_4214\_RTINSECONDS=1101

Data file E:\\RAW\\HumanPlaques\\mgf\\T1\\ID\\T130801\_HPL\_Human\_Plaque\_BR2\_TR1\_02.mgf

Click mouse within plot area to zoom in by factor of two about that point

Or,  to  Da

Label all possible matches  Label matches used for scoring

Show Y-axis

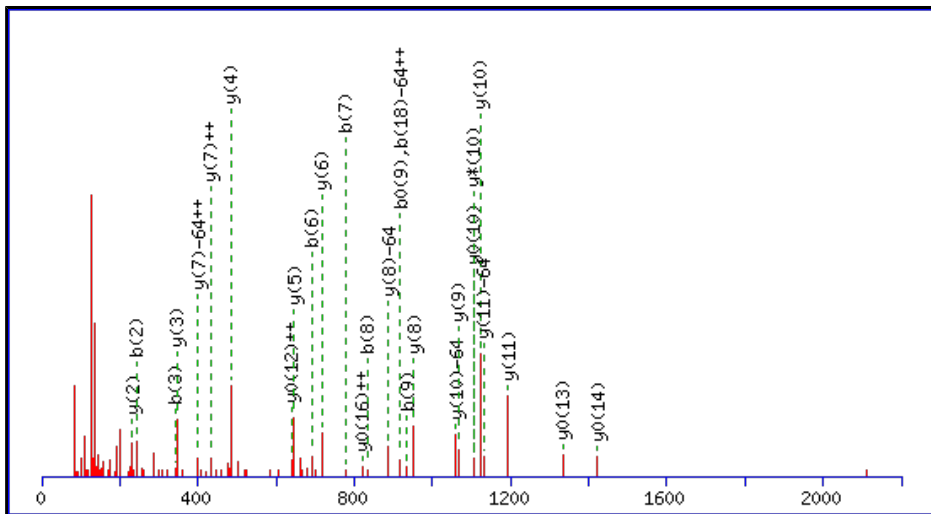

Monoisotopic mass of neutral peptide **Mr(calc)**: 2127.9644

**Fixed modifications**: Carbamidomethyl (C) (apply to specified residues or termini only)

**Variable modifications**:

M14 : Oxidation (M), with neutral losses 0.0000(shown in table), 63.9983

**Ions Score**: 65 **Expect**: 1.6e-005

**Matches** : 28/318 fragment ions using 44 most intense peaks ([help](#))

| #  | b               | b <sup>++</sup> | b <sup>*</sup> | b <sup>***</sup> | b <sup>0</sup>  | b <sup>0++</sup> | Seq. | y                | y <sup>++</sup> | y <sup>*</sup>   | y <sup>***</sup> | y <sup>0</sup>   | y <sup>0++</sup> | #  |
|----|-----------------|-----------------|----------------|------------------|-----------------|------------------|------|------------------|-----------------|------------------|------------------|------------------|------------------|----|
| 1  | 114.0913        | 57.5493         |                |                  |                 |                  | L    |                  |                 |                  |                  |                  |                  | 20 |
| 2  | <b>242.1863</b> | 121.5968        | 225.1598       | 113.0835         |                 |                  | K    | 2015.8876        | 1008.4474       | 1998.8610        | 999.9342         | 1997.8770        | 999.4421         | 19 |
| 3  | <b>341.2547</b> | 171.1310        | 324.2282       | 162.6177         |                 |                  | V    | 1887.7926        | 944.3999        | 1870.7661        | 935.8867         | 1869.7821        | 935.3947         | 18 |
| 4  | 470.2973        | 235.6523        | 453.2708       | 227.1390         | 452.2867        | 226.6470         | E    | 1788.7242        | 894.8657        | 1771.6977        | 886.3525         | 1770.7136        | 885.8605         | 17 |
| 5  | 527.3188        | 264.1630        | 510.2922       | 255.6498         | 509.3082        | 255.1577         | G    | 1659.6816        | 830.3444        | 1642.6551        | 821.8312         | 1641.6710        | <b>821.3392</b>  | 16 |
| 6  | <b>690.3821</b> | 345.6947        | 673.3556       | 337.1814         | 672.3715        | 336.6894         | Y    | 1602.6601        | 801.8337        | 1585.6336        | 793.3204         | 1584.6496        | 792.8284         | 15 |
| 7  | <b>777.4141</b> | 389.2107        | 760.3876       | 380.6974         | 759.4036        | 380.2054         | S    | 1439.5968        | 720.3020        | 1422.5703        | 711.7888         | <b>1421.5863</b> | 711.2968         | 14 |
| 8  | <b>834.4356</b> | 417.7214        | 817.4090       | 409.2082         | 816.4250        | 408.7162         | G    | 1352.5648        | 676.7860        | 1335.5382        | 668.2728         | <b>1334.5542</b> | 667.7808         | 13 |
| 9  | <b>935.4833</b> | 468.2453        | 918.4567       | 459.7320         | <b>917.4727</b> | 459.2400         | T    | 1295.5433        | 648.2753        | 1278.5168        | 639.7620         | 1277.5328        | <b>639.2700</b>  | 12 |
| 10 | 1006.5204       | 503.7638        | 989.4938       | 495.2506         | 988.5098        | 494.7585         | A    | <b>1194.4956</b> | 597.7515        | 1177.4691        | 589.2382         | 1176.4851        | 588.7462         | 11 |
| 11 | 1063.5419       | 532.2746        | 1046.5153      | 523.7613         | 1045.5313       | 523.2693         | G    | <b>1123.4585</b> | 562.2329        | <b>1106.4320</b> | 553.7196         | <b>1105.4480</b> | 553.2276         | 10 |
| 12 | 1178.5688       | 589.7880        | 1161.5422      | 581.2748         | 1160.5582       | 580.7828         | D    | <b>1066.4371</b> | 533.7222        | 1049.4105        | 525.2089         | 1048.4265        | 524.7169         | 9  |
| 13 | 1265.6008       | 633.3040        | 1248.5743      | 624.7908         | 1247.5903       | 624.2988         | S    | <b>951.4101</b>  | 476.2087        | 934.3836         | 467.6954         | 933.3996         | 467.2034         | 8  |
| 14 | 1412.6362       | 706.8217        | 1395.6097      | 698.3085         | 1394.6257       | 697.8165         | M    | 864.3781         | <b>432.6927</b> | 847.3515         | 424.1794         |                  |                  | 7  |
| 15 | 1483.6733       | 742.3403        | 1466.6468      | 733.8270         | 1465.6628       | 733.3350         | A    | <b>717.3427</b>  | 359.1750        | 700.3161         | 350.6617         |                  |                  | 6  |
| 16 | 1646.7367       | 823.8720        | 1629.7101      | 815.3587         | 1628.7261       | 814.8667         | Y    | <b>646.3056</b>  | 323.6564        | 629.2790         | 315.1432         |                  |                  | 5  |

|    |           |          |           |          |           |          |   |          |          |          |          |  |  |   |
|----|-----------|----------|-----------|----------|-----------|----------|---|----------|----------|----------|----------|--|--|---|
| 17 | 1783.7956 | 892.4014 | 1766.7690 | 883.8882 | 1765.7850 | 883.3961 | H | 483.2423 | 242.1248 | 466.2157 | 233.6115 |  |  | 4 |
| 18 | 1897.8385 | 949.4229 | 1880.8120 | 940.9096 | 1879.8279 | 940.4176 | N | 346.1833 | 173.5953 | 329.1568 | 165.0820 |  |  | 3 |
| 19 | 1954.8600 | 977.9336 | 1937.8334 | 969.4203 | 1936.8494 | 968.9283 | G | 232.1404 | 116.5738 | 215.1139 | 108.0606 |  |  | 2 |
| 20 |           |          |           |          |           |          | R | 175.1190 | 88.0631  | 158.0924 | 79.5498  |  |  | 1 |

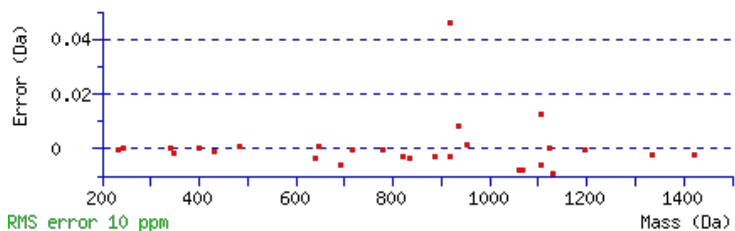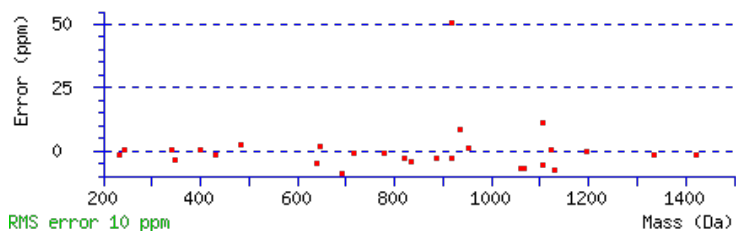

NCBI BLAST search of [LKVEGYSGTAGDSMAYHNGR](#)  
 (Parameters: blastp, nr protein database, expect=20000, no filter, PAM30)

Other BLAST [web gateways](#)

All matches to this query

| Score | Mr(calc)  | Delta   | Sequence                             |
|-------|-----------|---------|--------------------------------------|
| 65.3  | 2127.9644 | -0.0010 | <a href="#">LKVEGYSGTAGDSMAYHNGR</a> |

Mascot: <http://www.matrixscience.com/>

# Mascot Search Results

## Peptide View

MS/MS Fragmentation of **LKVEGYSGTAGDSMAYHNGR**

Found in **P24821** in **uni\_human\_nr**, TENA\_HUMAN Tenascin OS=Homo sapiens GN=TNC PE=1 SV=3

Match to Query 9463: 2112.949722 from(705.323850,3+) intensity(495964.6875) rtinseconds(1473) scans(7773) index(5576)

Title: 130806\_HPL\_Human\_Plaque\_BR1\_TR2\_05\_Spectrum028372\_scans\_\_7773\_RTINSECONDS=1473

Data file E:\\RAW\\HumanPlaques\\mgf\\T\\1D\\T130806\_HPL\_Human\_Plaque\_BR1\_TR2\_05.mgf

Click mouse within plot area to zoom in by factor of two about that point

Or,  to  Da

Label all possible matches  Label matches used for scoring

Show Y-axis

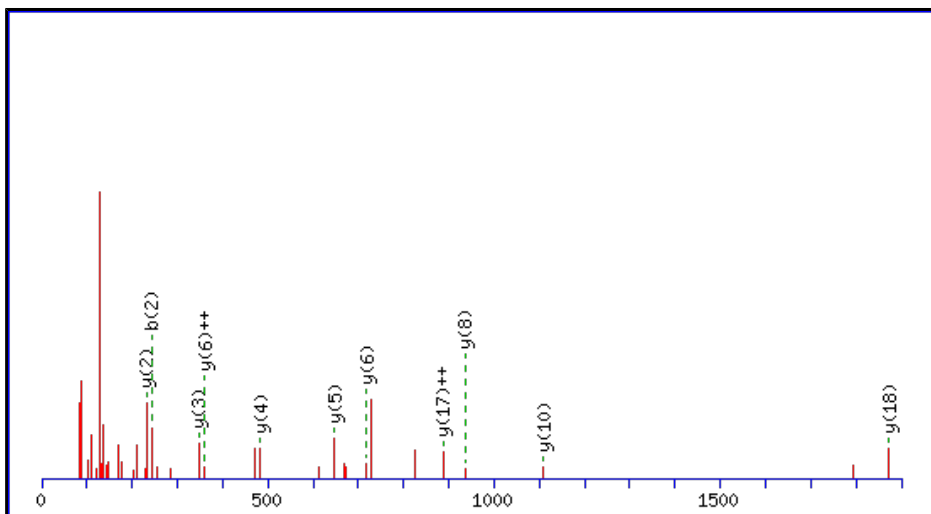

Monoisotopic mass of neutral peptide **Mr(calc)**: 2112.9534

**Fixed modifications**: Carbamidomethyl (C) (apply to specified residues or termini only)

**Variable modifications**:

**N18** : Deamidated (NQ)

**Ions Score**: 39 **Expect**: 0.0079

**Matches** : 11/206 fragment ions using 23 most intense peaks ([help](#))

| #  | b               | b <sup>++</sup> | b <sup>*</sup> | b <sup>***</sup> | b <sup>0</sup> | b <sup>0++</sup> | Seq. | y                | y <sup>++</sup> | y <sup>*</sup> | y <sup>***</sup> | y <sup>0</sup> | y <sup>0++</sup> | #  |
|----|-----------------|-----------------|----------------|------------------|----------------|------------------|------|------------------|-----------------|----------------|------------------|----------------|------------------|----|
| 1  | 114.0913        | 57.5493         |                |                  |                |                  | L    |                  |                 |                |                  |                |                  | 20 |
| 2  | <b>242.1863</b> | 121.5968        | 225.1598       | 113.0835         |                |                  | K    | 2000.8767        | 1000.9420       | 1983.8501      | 992.4287         | 1982.8661      | 991.9367         | 19 |
| 3  | 341.2547        | 171.1310        | 324.2282       | 162.6177         |                |                  | V    | <b>1872.7817</b> | 936.8945        | 1855.7552      | 928.3812         | 1854.7712      | 927.8892         | 18 |
| 4  | 470.2973        | 235.6523        | 453.2708       | 227.1390         | 452.2867       | 226.6470         | E    | 1773.7133        | <b>887.3603</b> | 1756.6868      | 878.8470         | 1755.7027      | 878.3550         | 17 |
| 5  | 527.3188        | 264.1630        | 510.2922       | 255.6498         | 509.3082       | 255.1577         | G    | 1644.6707        | 822.8390        | 1627.6442      | 814.3257         | 1626.6601      | 813.8337         | 16 |
| 6  | 690.3821        | 345.6947        | 673.3556       | 337.1814         | 672.3715       | 336.6894         | Y    | 1587.6492        | 794.3283        | 1570.6227      | 785.8150         | 1569.6387      | 785.3230         | 15 |
| 7  | 777.4141        | 389.2107        | 760.3876       | 380.6974         | 759.4036       | 380.2054         | S    | 1424.5859        | 712.7966        | 1407.5594      | 704.2833         | 1406.5754      | 703.7913         | 14 |
| 8  | 834.4356        | 417.7214        | 817.4090       | 409.2082         | 816.4250       | 408.7162         | G    | 1337.5539        | 669.2806        | 1320.5273      | 660.7673         | 1319.5433      | 660.2753         | 13 |
| 9  | 935.4833        | 468.2453        | 918.4567       | 459.7320         | 917.4727       | 459.2400         | T    | 1280.5324        | 640.7699        | 1263.5059      | 632.2566         | 1262.5219      | 631.7646         | 12 |
| 10 | 1006.5204       | 503.7638        | 989.4938       | 495.2506         | 988.5098       | 494.7585         | A    | 1179.4847        | 590.2460        | 1162.4582      | 581.7327         | 1161.4742      | 581.2407         | 11 |
| 11 | 1063.5419       | 532.2746        | 1046.5153      | 523.7613         | 1045.5313      | 523.2693         | G    | <b>1108.4476</b> | 554.7275        | 1091.4211      | 546.2142         | 1090.4371      | 545.7222         | 10 |
| 12 | 1178.5688       | 589.7880        | 1161.5422      | 581.2748         | 1160.5582      | 580.7828         | D    | 1051.4262        | 526.2167        | 1034.3996      | 517.7034         | 1033.4156      | 517.2114         | 9  |
| 13 | 1265.6008       | 633.3040        | 1248.5743      | 624.7908         | 1247.5903      | 624.2988         | S    | <b>936.3992</b>  | 468.7033        | 919.3727       | 460.1900         | 918.3887       | 459.6980         | 8  |
| 14 | 1396.6413       | 698.8243        | 1379.6148      | 690.3110         | 1378.6307      | 689.8190         | M    | 849.3672         | 425.1872        | 832.3407       | 416.6740         |                |                  | 7  |
| 15 | 1467.6784       | 734.3428        | 1450.6519      | 725.8296         | 1449.6679      | 725.3376         | A    | <b>718.3267</b>  | <b>359.6670</b> | 701.3002       | 351.1537         |                |                  | 6  |
| 16 | 1630.7418       | 815.8745        | 1613.7152      | 807.3612         | 1612.7312      | 806.8692         | Y    | <b>647.2896</b>  | 324.1484        | 630.2631       | 315.6352         |                |                  | 5  |

|    |           |          |           |          |           |          |   |          |          |          |          |  |  |   |
|----|-----------|----------|-----------|----------|-----------|----------|---|----------|----------|----------|----------|--|--|---|
| 17 | 1767.8007 | 884.4040 | 1750.7741 | 875.8907 | 1749.7901 | 875.3987 | H | 484.2263 | 242.6168 | 467.1997 | 234.1035 |  |  | 4 |
| 18 | 1882.8276 | 941.9174 | 1865.8011 | 933.4042 | 1864.8170 | 932.9122 | N | 347.1674 | 174.0873 | 330.1408 | 165.5740 |  |  | 3 |
| 19 | 1939.8491 | 970.4282 | 1922.8225 | 961.9149 | 1921.8385 | 961.4229 | G | 232.1404 | 116.5738 | 215.1139 | 108.0606 |  |  | 2 |
| 20 |           |          |           |          |           |          | R | 175.1190 | 88.0631  | 158.0924 | 79.5498  |  |  | 1 |

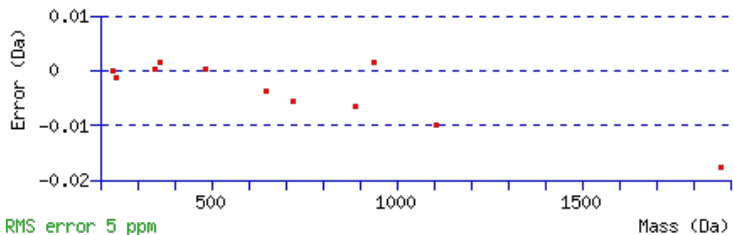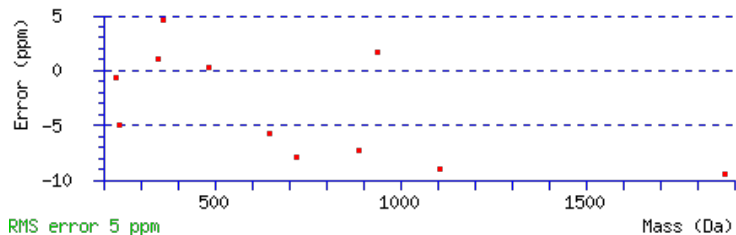

NCBI BLAST search of [LKVEGYSGTAGDSMAYHNGR](#)  
 (Parameters: blastp, nr protein database, expect=20000, no filter, PAM30)

Other BLAST [web gateways](#)

All matches to this query

| Score | Mr(calc)  | Delta   | Sequence                              |
|-------|-----------|---------|---------------------------------------|
| 38.5  | 2112.9534 | -0.0037 | <a href="#">LKVEGYSGTAGDSMAYHNGR</a>  |
| 0.5   | 2111.9550 | 0.9947  | <a href="#">KMNVPGGGAAAVMMTGYNNGR</a> |
| 0.5   | 2112.9391 | 0.0107  | <a href="#">KMNVPGGGAAAVMMTGYNNGR</a> |
| 0.5   | 2111.9550 | 0.9947  | <a href="#">KMNVPGGGAAAVMMTGYNNGR</a> |
| 0.5   | 2112.9391 | 0.0107  | <a href="#">KMNVPGGGAAAVMMTGYNNGR</a> |
| 0.5   | 2112.9391 | 0.0107  | <a href="#">KMNVPGGGAAAVMMTGYNNGR</a> |
| 0.5   | 2112.9391 | 0.0107  | <a href="#">KMNVPGGGAAAVMMTGYNNGR</a> |
| 0.5   | 2111.9550 | 0.9947  | <a href="#">KMNVPGGGAAAVMMTGYNNGR</a> |
| 0.5   | 2112.9391 | 0.0107  | <a href="#">KMNVPGGGAAAVMMTGYNNGR</a> |
| 0.5   | 2112.9391 | 0.0107  | <a href="#">KMNVPGGGAAAVMMTGYNNGR</a> |

Mascot: <http://www.matrixscience.com/>

# Mascot Search Results

## Peptide View

MS/MS Fragmentation of **LKVEGYSGTAGDSMAYHNGR**

Found in **P24821** in **uni\_human\_nr**, TENA\_HUMAN Tenascin OS=Homo sapiens GN=TNC PE=1 SV=3

Match to Query 11125: 2111.967192 from(704.996340,3+) intensity(44985036.0000) rtinseconds(1239) scans(5782) index(3614)

Title: 130801\_HPL\_Human\_Plaque\_BR1\_TR1\_02\_Spectrum027621\_scans\_\_5782\_RTINSECONDS=1239

Data file E:\RAW\HumanPlaques\mgf\T\1D\T130801\_HPL\_Human\_Plaque\_BR1\_TR1\_02.mgf

Click mouse within plot area to zoom in by factor of two about that point

Or,  to  Da

Label all possible matches  Label matches used for scoring

Show Y-axis

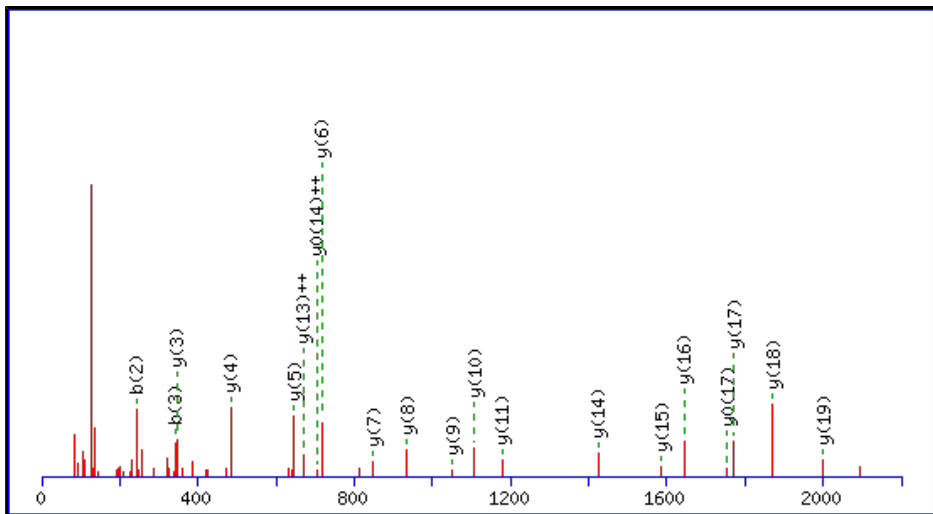

Monoisotopic mass of neutral peptide  $M_r(\text{calc})$ : 2111.9694

Fixed modifications: Carbamidomethyl (C) (apply to specified residues or termini only)

Ions Score: 145 Expect: 2.2e-013

Matches : 20/206 fragment ions using 27 most intense peaks ([help](#))

| #  | b               | b <sup>++</sup> | b <sup>*</sup> | b <sup>***</sup> | b <sup>0</sup> | b <sup>0++</sup> | Seq. | y                | y <sup>++</sup> | y <sup>*</sup> | y <sup>***</sup> | y <sup>0</sup>   | y <sup>0++</sup> | #  |
|----|-----------------|-----------------|----------------|------------------|----------------|------------------|------|------------------|-----------------|----------------|------------------|------------------|------------------|----|
| 1  | 114.0913        | 57.5493         |                |                  |                |                  | L    |                  |                 |                |                  |                  |                  | 20 |
| 2  | <b>242.1863</b> | 121.5968        | 225.1598       | 113.0835         |                |                  | K    | <b>1999.8927</b> | 1000.4500       | 1982.8661      | 991.9367         | 1981.8821        | 991.4447         | 19 |
| 3  | <b>341.2547</b> | 171.1310        | 324.2282       | 162.6177         |                |                  | V    | <b>1871.7977</b> | 936.4025        | 1854.7712      | 927.8892         | 1853.7871        | 927.3972         | 18 |
| 4  | 470.2973        | 235.6523        | 453.2708       | 227.1390         | 452.2867       | 226.6470         | E    | <b>1772.7293</b> | 886.8683        | 1755.7027      | 878.3550         | <b>1754.7187</b> | 877.8630         | 17 |
| 5  | 527.3188        | 264.1630        | 510.2922       | 255.6498         | 509.3082       | 255.1577         | G    | <b>1643.6867</b> | 822.3470        | 1626.6601      | 813.8337         | 1625.6761        | 813.3417         | 16 |
| 6  | 690.3821        | 345.6947        | 673.3556       | 337.1814         | 672.3715       | 336.6894         | Y    | <b>1586.6652</b> | 793.8363        | 1569.6387      | 785.3230         | 1568.6547        | 784.8310         | 15 |
| 7  | 777.4141        | 389.2107        | 760.3876       | 380.6974         | 759.4036       | 380.2054         | S    | <b>1423.6019</b> | 712.3046        | 1406.5754      | 703.7913         | 1405.5913        | <b>703.2993</b>  | 14 |
| 8  | 834.4356        | 417.7214        | 817.4090       | 409.2082         | 816.4250       | 408.7162         | G    | 1336.5699        | <b>668.7886</b> | 1319.5433      | 660.2753         | 1318.5593        | 659.7833         | 13 |
| 9  | 935.4833        | 468.2453        | 918.4567       | 459.7320         | 917.4727       | 459.2400         | T    | 1279.5484        | 640.2778        | 1262.5219      | 631.7646         | 1261.5378        | 631.2726         | 12 |
| 10 | 1006.5204       | 503.7638        | 989.4938       | 495.2506         | 988.5098       | 494.7585         | A    | <b>1178.5007</b> | 589.7540        | 1161.4742      | 581.2407         | 1160.4902        | 580.7487         | 11 |
| 11 | 1063.5419       | 532.2746        | 1046.5153      | 523.7613         | 1045.5313      | 523.2693         | G    | <b>1107.4636</b> | 554.2354        | 1090.4371      | 545.7222         | 1089.4531        | 545.2302         | 10 |
| 12 | 1178.5688       | 589.7880        | 1161.5422      | 581.2748         | 1160.5582      | 580.7828         | D    | <b>1050.4422</b> | 525.7247        | 1033.4156      | 517.2114         | 1032.4316        | 516.7194         | 9  |
| 13 | 1265.6008       | 633.3040        | 1248.5743      | 624.7908         | 1247.5903      | 624.2988         | S    | <b>935.4152</b>  | 468.2112        | 918.3887       | 459.6980         | 917.4046         | 459.2060         | 8  |
| 14 | 1396.6413       | 698.8243        | 1379.6148      | 690.3110         | 1378.6307      | 689.8190         | M    | <b>848.3832</b>  | 424.6952        | 831.3566       | 416.1820         |                  |                  | 7  |
| 15 | 1467.6784       | 734.3428        | 1450.6519      | 725.8296         | 1449.6679      | 725.3376         | A    | <b>717.3427</b>  | 359.1750        | 700.3161       | 350.6617         |                  |                  | 6  |
| 16 | 1630.7418       | 815.8745        | 1613.7152      | 807.3612         | 1612.7312      | 806.8692         | Y    | <b>646.3056</b>  | 323.6564        | 629.2790       | 315.1432         |                  |                  | 5  |
| 17 | 1767.8007       | 884.4040        | 1750.7741      | 875.8907         | 1749.7901      | 875.3987         | H    | <b>483.2423</b>  | 242.1248        | 466.2157       | 233.6115         |                  |                  | 4  |



|    |           |          |           |          |           |          |   |                 |          |          |          |  |  |   |
|----|-----------|----------|-----------|----------|-----------|----------|---|-----------------|----------|----------|----------|--|--|---|
| 18 | 1881.8436 | 941.4254 | 1864.8170 | 932.9122 | 1863.8330 | 932.4202 | N | <b>346.1833</b> | 173.5953 | 329.1568 | 165.0820 |  |  | 3 |
| 19 | 1938.8651 | 969.9362 | 1921.8385 | 961.4229 | 1920.8545 | 960.9309 | G | 232.1404        | 116.5738 | 215.1139 | 108.0606 |  |  | 2 |
| 20 |           |          |           |          |           |          | R | 175.1190        | 88.0631  | 158.0924 | 79.5498  |  |  | 1 |

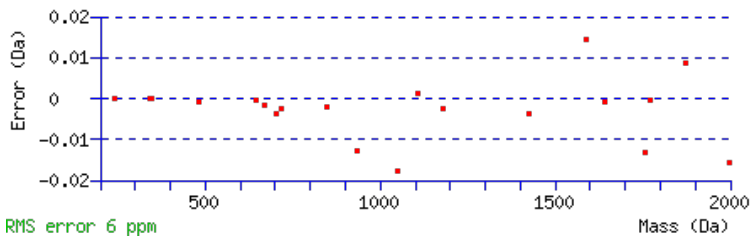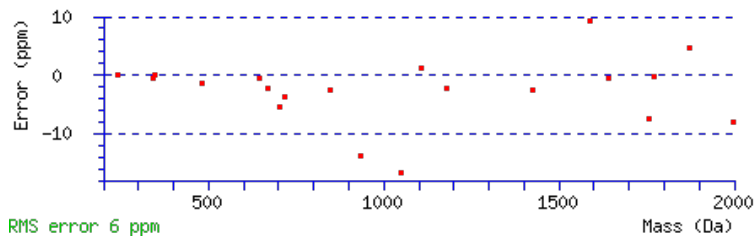

NCBI BLAST search of [LKVEGYSGTAGDSMAYHNGR](#)  
 (Parameters: blastp, nr protein database, expect=20000, no filter, PAM30)  
 Other BLAST [web gateways](#)

All matches to this query

| Score | Mr(calc)  | Delta   | Sequence                             |
|-------|-----------|---------|--------------------------------------|
| 144.7 | 2111.9694 | -0.0022 | <a href="#">LKVEGYSGTAGDSMAYHNGR</a> |
| 3.2   | 2109.9524 | 2.0148  | <a href="#">KICEQSTESLNNDWEKK</a>    |
| 2.3   | 2109.9524 | 2.0148  | <a href="#">KICEQSTESLNNDWEKK</a>    |

Mascot: <http://www.matrixscience.com/>

# Mascot Search Results

## Peptide View

MS/MS Fragmentation of **LKVEGYSGTAGDSMAYHNGR**

Found in **P24821** in **uni\_human\_nr**, TENA\_HUMAN Tenascin OS=Homo sapiens GN=TNC PE=1 SV=3

Match to Query 10986: 2111.967128 from(1056.990840,2+) intensity(8721993.0000) rtinseconds(1238) scans(5386) index(3168)

Title: 130801\_HPL\_Human\_Plaque\_BR2\_TR1\_02\_Spectrum027323\_scans\_\_5386\_RTINSECONDS=1238

Data file E:\\RAW\\HumanPlaques\\mgf\\T\\1D\\T130801\_HPL\_Human\_Plaque\_BR2\_TR1\_02.mgf

Click mouse within plot area to zoom in by factor of two about that point

Or,  to  Da

Label all possible matches  Label matches used for scoring

Show Y-axis

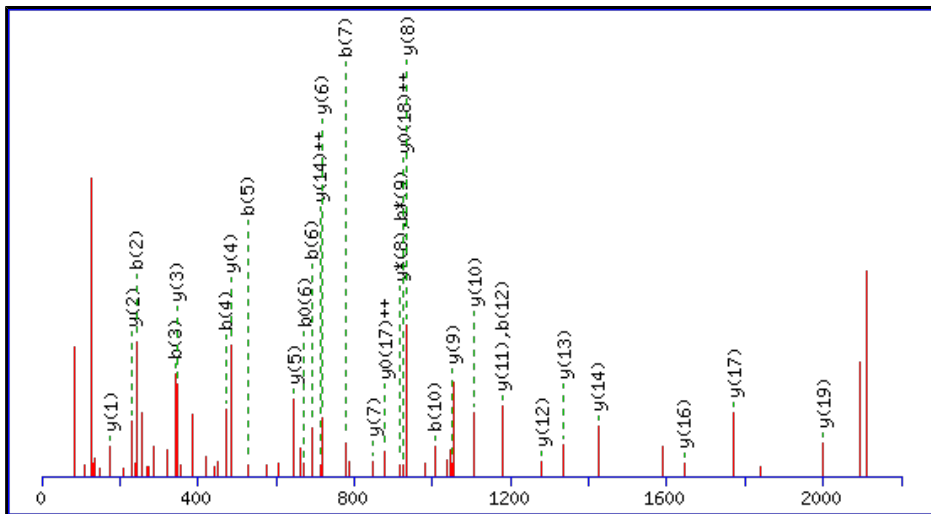

Monoisotopic mass of neutral peptide  $M_r(\text{calc})$ : 2111.9694

Fixed modifications: Carbamidomethyl (C) (apply to specified residues or termini only)

Ions Score: 132 Expect: 4.2e-012

Matches : 31/206 fragment ions using 55 most intense peaks ([help](#))

| #  | b                | b <sup>++</sup> | b <sup>*</sup>  | b <sup>***</sup> | b <sup>0</sup>  | b <sup>0++</sup> | Seq. | y                | y <sup>++</sup> | y <sup>*</sup>  | y <sup>***</sup> | y <sup>0</sup> | y <sup>0++</sup> | #  |
|----|------------------|-----------------|-----------------|------------------|-----------------|------------------|------|------------------|-----------------|-----------------|------------------|----------------|------------------|----|
| 1  | 114.0913         | 57.5493         |                 |                  |                 |                  | L    |                  |                 |                 |                  |                |                  | 20 |
| 2  | <b>242.1863</b>  | 121.5968        | 225.1598        | 113.0835         |                 |                  | K    | <b>1999.8927</b> | 1000.4500       | 1982.8661       | 991.9367         | 1981.8821      | 991.4447         | 19 |
| 3  | <b>341.2547</b>  | 171.1310        | 324.2282        | 162.6177         |                 |                  | V    | 1871.7977        | 936.4025        | 1854.7712       | 927.8892         | 1853.7871      | <b>927.3972</b>  | 18 |
| 4  | <b>470.2973</b>  | 235.6523        | 453.2708        | 227.1390         | 452.2867        | 226.6470         | E    | <b>1772.7293</b> | 886.8683        | 1755.7027       | 878.3550         | 1754.7187      | <b>877.8630</b>  | 17 |
| 5  | <b>527.3188</b>  | 264.1630        | 510.2922        | 255.6498         | 509.3082        | 255.1577         | G    | <b>1643.6867</b> | 822.3470        | 1626.6601       | 813.8337         | 1625.6761      | 813.3417         | 16 |
| 6  | <b>690.3821</b>  | 345.6947        | 673.3556        | 337.1814         | <b>672.3715</b> | 336.6894         | Y    | 1586.6652        | 793.8363        | 1569.6387       | 785.3230         | 1568.6547      | 784.8310         | 15 |
| 7  | <b>777.4141</b>  | 389.2107        | 760.3876        | 380.6974         | 759.4036        | 380.2054         | S    | <b>1423.6019</b> | <b>712.3046</b> | 1406.5754       | 703.7913         | 1405.5913      | 703.2993         | 14 |
| 8  | 834.4356         | 417.7214        | 817.4090        | 409.2082         | 816.4250        | 408.7162         | G    | <b>1336.5699</b> | 668.7886        | 1319.5433       | 660.2753         | 1318.5593      | 659.7833         | 13 |
| 9  | 935.4833         | 468.2453        | <b>918.4567</b> | 459.7320         | 917.4727        | 459.2400         | T    | <b>1279.5484</b> | 640.2778        | 1262.5219       | 631.7646         | 1261.5378      | 631.2726         | 12 |
| 10 | <b>1006.5204</b> | 503.7638        | 989.4938        | 495.2506         | 988.5098        | 494.7585         | A    | <b>1178.5007</b> | 589.7540        | 1161.4742       | 581.2407         | 1160.4902      | 580.7487         | 11 |
| 11 | 1063.5419        | 532.2746        | 1046.5153       | 523.7613         | 1045.5313       | 523.2693         | G    | <b>1107.4636</b> | 554.2354        | 1090.4371       | 545.7222         | 1089.4531      | 545.2302         | 10 |
| 12 | <b>1178.5688</b> | 589.7880        | 1161.5422       | 581.2748         | 1160.5582       | 580.7828         | D    | <b>1050.4422</b> | 525.7247        | 1033.4156       | 517.2114         | 1032.4316      | 516.7194         | 9  |
| 13 | 1265.6008        | 633.3040        | 1248.5743       | 624.7908         | 1247.5903       | 624.2988         | S    | <b>935.4152</b>  | 468.2112        | <b>918.3887</b> | 459.6980         | 917.4046       | 459.2060         | 8  |
| 14 | 1396.6413        | 698.8243        | 1379.6148       | 690.3110         | 1378.6307       | 689.8190         | M    | <b>848.3832</b>  | 424.6952        | 831.3566        | 416.1820         |                |                  | 7  |
| 15 | 1467.6784        | 734.3428        | 1450.6519       | 725.8296         | 1449.6679       | 725.3376         | A    | <b>717.3427</b>  | 359.1750        | 700.3161        | 350.6617         |                |                  | 6  |
| 16 | 1630.7418        | 815.8745        | 1613.7152       | 807.3612         | 1612.7312       | 806.8692         | Y    | <b>646.3056</b>  | 323.6564        | 629.2790        | 315.1432         |                |                  | 5  |
| 17 | 1767.8007        | 884.4040        | 1750.7741       | 875.8907         | 1749.7901       | 875.3987         | H    | <b>483.2423</b>  | 242.1248        | 466.2157        | 233.6115         |                |                  | 4  |

|    |           |          |           |          |           |          |   |                 |          |          |          |  |  |   |
|----|-----------|----------|-----------|----------|-----------|----------|---|-----------------|----------|----------|----------|--|--|---|
| 18 | 1881.8436 | 941.4254 | 1864.8170 | 932.9122 | 1863.8330 | 932.4202 | N | <b>346.1833</b> | 173.5953 | 329.1568 | 165.0820 |  |  | 3 |
| 19 | 1938.8651 | 969.9362 | 1921.8385 | 961.4229 | 1920.8545 | 960.9309 | G | <b>232.1404</b> | 116.5738 | 215.1139 | 108.0606 |  |  | 2 |
| 20 |           |          |           |          |           |          | R | <b>175.1190</b> | 88.0631  | 158.0924 | 79.5498  |  |  | 1 |

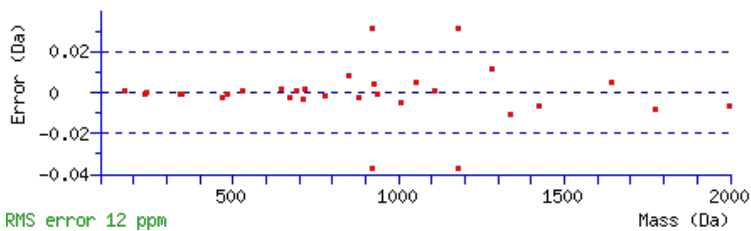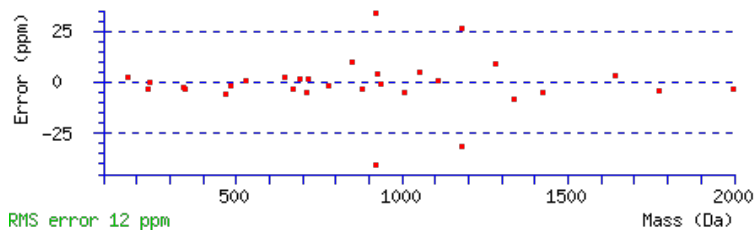

NCBI BLAST search of [LKVEGYSGTAGDSMAYHNGR](#)  
 (Parameters: blastp, nr protein database, expect=20000, no filter, PAM30)  
 Other BLAST [web gateways](#)

All matches to this query

| Score | Mr(calc)  | Delta   | Sequence                             |
|-------|-----------|---------|--------------------------------------|
| 131.8 | 2111.9694 | -0.0023 | <a href="#">LKVEGYSGTAGDSMAYHNGR</a> |

Mascot: <http://www.matrixscience.com/>

# Mascot Search Results

## Peptide View

MS/MS Fragmentation of **NGRENFYQNWK**

Found in **P24821** in **uni\_human\_nr**, TENA\_HUMAN Tenascin OS=Homo sapiens GN=TNC PE=1 SV=3

Match to Query 3794: 1455.651828 from(728.833190,2+) intensity(1754434.0000) rtinseconds(1640) scans(9333) index(6946)

Title: 130809\_HPL\_Human\_Plaque\_BR2\_TR3\_03\_Spectrum030734\_scans\_9333\_RTINSECONDS=1640

Data file E:\RAW\HumanPlaques\mgf\T\1D\T130809\_HPL\_Human\_Plaque\_BR2\_TR3\_03.mgf

Click mouse within plot area to zoom in by factor of two about that point

Or,  to  Da

Label all possible matches  Label matches used for scoring

Show Y-axis

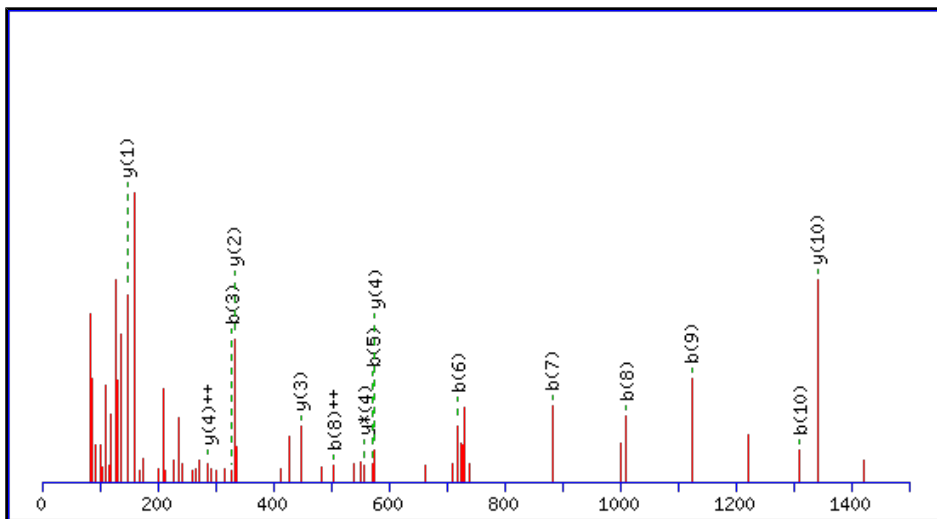

**Monoisotopic mass of neutral peptide Mr(calc):** 1455.6531

**Fixed modifications:** Carbamidomethyl (C) (apply to specified residues or termini only)

**Variable modifications:**

N1 : Deamidated (NQ)

**Ions Score:** 25 **Expect:** 0.11

**Matches :** 15/100 fragment ions using 43 most intense peaks ([help](#))

| #  | b         | b <sup>++</sup> | b <sup>*</sup> | b <sup>*++</sup> | b <sup>0</sup> | b <sup>0++</sup> | Seq. | y         | y <sup>++</sup> | y <sup>*</sup> | y <sup>*++</sup> | y <sup>0</sup> | y <sup>0++</sup> | #  |
|----|-----------|-----------------|----------------|------------------|----------------|------------------|------|-----------|-----------------|----------------|------------------|----------------|------------------|----|
| 1  | 116.0342  | 58.5207         | 99.0077        | 50.0075          |                |                  | N    |           |                 |                |                  |                |                  | 11 |
| 2  | 173.0557  | 87.0315         | 156.0291       | 78.5182          |                |                  | G    | 1341.6335 | 671.3204        | 1324.6069      | 662.8071         | 1323.6229      | 662.3151         | 10 |
| 3  | 329.1568  | 165.0820        | 312.1302       | 156.5688         |                |                  | R    | 1284.6120 | 642.8096        | 1267.5854      | 634.2964         | 1266.6014      | 633.8044         | 9  |
| 4  | 458.1994  | 229.6033        | 441.1728       | 221.0901         | 440.1888       | 220.5980         | E    | 1128.5109 | 564.7591        | 1111.4843      | 556.2458         | 1110.5003      | 555.7538         | 8  |
| 5  | 572.2423  | 286.6248        | 555.2158       | 278.1115         | 554.2317       | 277.6195         | N    | 999.4683  | 500.2378        | 982.4417       | 491.7245         |                |                  | 7  |
| 6  | 719.3107  | 360.1590        | 702.2842       | 351.6457         | 701.3002       | 351.1537         | F    | 885.4254  | 443.2163        | 868.3988       | 434.7030         |                |                  | 6  |
| 7  | 882.3741  | 441.6907        | 865.3475       | 433.1774         | 864.3635       | 432.6854         | Y    | 738.3570  | 369.6821        | 721.3304       | 361.1688         |                |                  | 5  |
| 8  | 1010.4326 | 505.7200        | 993.4061       | 497.2067         | 992.4221       | 496.7147         | Q    | 575.2936  | 288.1504        | 558.2671       | 279.6372         |                |                  | 4  |
| 9  | 1124.4756 | 562.7414        | 1107.4490      | 554.2281         | 1106.4650      | 553.7361         | N    | 447.2350  | 224.1212        | 430.2085       | 215.6079         |                |                  | 3  |
| 10 | 1310.5549 | 655.7811        | 1293.5283      | 647.2678         | 1292.5443      | 646.7758         | W    | 333.1921  | 167.0997        | 316.1656       | 158.5864         |                |                  | 2  |
| 11 |           |                 |                |                  |                |                  | K    | 147.1128  | 74.0600         | 130.0863       | 65.5468          |                |                  | 1  |

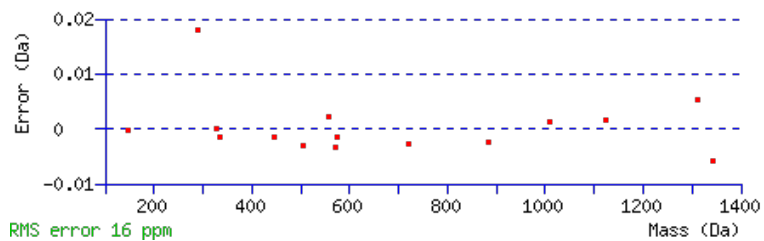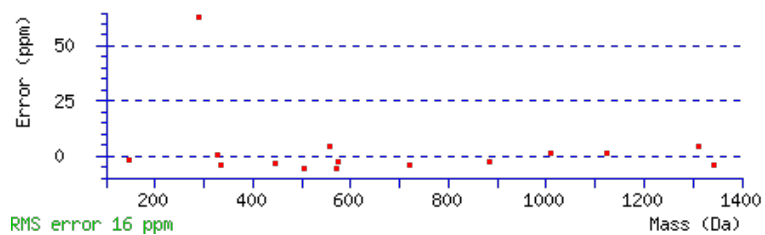

NCBI BLAST search of [NGRENFYQNWK](#)

(Parameters: blastp, nr protein database, expect=20000, no filter, PAM30)

Other BLAST [web gateways](#)

**All matches to this query**

| Score | Mr(calc)  | Delta   | Sequence                    |
|-------|-----------|---------|-----------------------------|
| 25.2  | 1455.6531 | -0.0013 | <a href="#">NGRENFYQNWK</a> |
| 21.9  | 1455.6531 | -0.0013 | <a href="#">NGRENFYQNWK</a> |
| 0.6   | 1455.6531 | -0.0013 | <a href="#">NGRENFYQNWK</a> |

Mascot: <http://www.matrixscience.com/>

# Mascot Search Results

## Peptide View

MS/MS Fragmentation of **NGRENFYQNWK**

Found in **P24821** in **uni\_human\_nr**, TENA\_HUMAN Tenascin OS=Homo sapiens GN=TNC PE=1 SV=3

Match to Query 4089: 1454.669922 from(485.897250,3+) intensity(11428533.0000) rtinseconds(1191) scans(5372) index(3246)

Title: 130801\_HPL\_Human\_Plaque\_BR1\_TR1\_02\_Spectrum027253\_scans\_5372\_RTINSECONDS=1191

Data file E:\RAW\HumanPlaques\mgf\T\1D\T130801\_HPL\_Human\_Plaque\_BR1\_TR1\_02.mgf

Click mouse within plot area to zoom in by factor of two about that point

Or,  to  Da

Label all possible matches  Label matches used for scoring

Show Y-axis

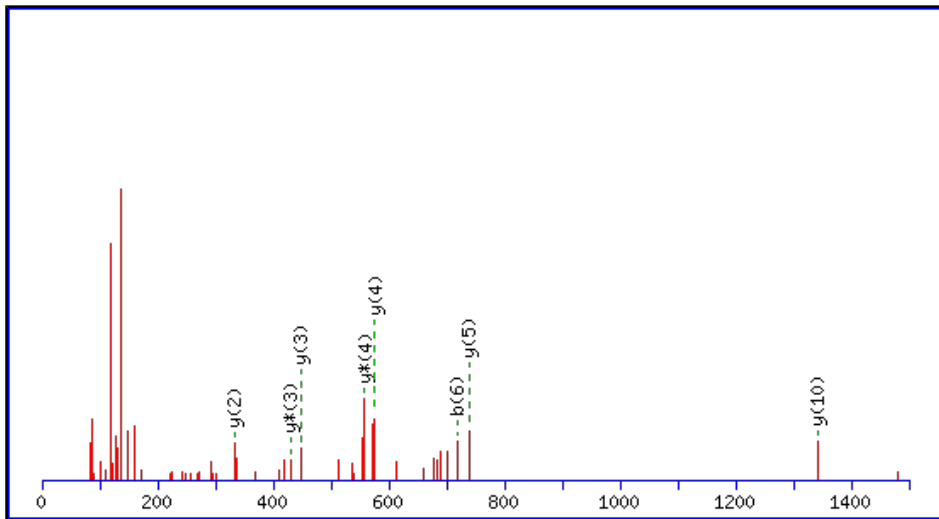

Monoisotopic mass of neutral peptide **Mr(calc)**: 1454.6691

Fixed modifications: Carbamidomethyl (C) (apply to specified residues or termini only)

Ions Score: 23 Expect: 0.24

Matches : 8/100 fragment ions using 15 most intense peaks ([help](#))

| #  | b               | b <sup>++</sup> | b <sup>*</sup> | b <sup>*++</sup> | b <sup>0</sup> | b <sup>0++</sup> | Seq. | y                | y <sup>++</sup> | y <sup>*</sup>  | y <sup>*++</sup> | y <sup>0</sup> | y <sup>0++</sup> | #  |
|----|-----------------|-----------------|----------------|------------------|----------------|------------------|------|------------------|-----------------|-----------------|------------------|----------------|------------------|----|
| 1  | 115.0502        | 58.0287         | 98.0237        | 49.5155          |                |                  | N    |                  |                 |                 |                  |                |                  | 11 |
| 2  | 172.0717        | 86.5395         | 155.0451       | 78.0262          |                |                  | G    | <b>1341.6335</b> | 671.3204        | 1324.6069       | 662.8071         | 1323.6229      | 662.3151         | 10 |
| 3  | 328.1728        | 164.5900        | 311.1462       | 156.0768         |                |                  | R    | 1284.6120        | 642.8096        | 1267.5854       | 634.2964         | 1266.6014      | 633.8044         | 9  |
| 4  | 457.2154        | 229.1113        | 440.1888       | 220.5980         | 439.2048       | 220.1060         | E    | 1128.5109        | 564.7591        | 1111.4843       | 556.2458         | 1110.5003      | 555.7538         | 8  |
| 5  | 571.2583        | 286.1328        | 554.2317       | 277.6195         | 553.2477       | 277.1275         | N    | 999.4683         | 500.2378        | 982.4417        | 491.7245         |                |                  | 7  |
| 6  | <b>718.3267</b> | 359.6670        | 701.3002       | 351.1537         | 700.3161       | 350.6617         | F    | 885.4254         | 443.2163        | 868.3988        | 434.7030         |                |                  | 6  |
| 7  | 881.3900        | 441.1987        | 864.3635       | 432.6854         | 863.3795       | 432.1934         | Y    | <b>738.3570</b>  | 369.6821        | 721.3304        | 361.1688         |                |                  | 5  |
| 8  | 1009.4486       | 505.2279        | 992.4221       | 496.7147         | 991.4381       | 496.2227         | Q    | <b>575.2936</b>  | 288.1504        | <b>558.2671</b> | 279.6372         |                |                  | 4  |
| 9  | 1123.4915       | 562.2494        | 1106.4650      | 553.7361         | 1105.4810      | 553.2441         | N    | <b>447.2350</b>  | 224.1212        | <b>430.2085</b> | 215.6079         |                |                  | 3  |
| 10 | 1309.5709       | 655.2891        | 1292.5443      | 646.7758         | 1291.5603      | 646.2838         | W    | <b>333.1921</b>  | 167.0997        | 316.1656        | 158.5864         |                |                  | 2  |
| 11 |                 |                 |                |                  |                |                  | K    | 147.1128         | 74.0600         | 130.0863        | 65.5468          |                |                  | 1  |

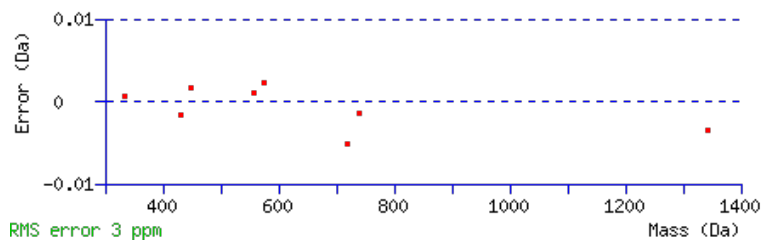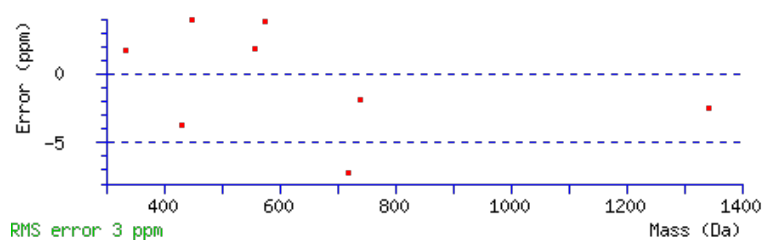

NCBI BLAST search of [NGRENFYQNWK](#)

(Parameters: blastp, nr protein database, expect=20000, no filter, PAM30)

Other BLAST [web gateways](#)

**All matches to this query**

| Score | Mr(calc)  | Delta  | Sequence                    |
|-------|-----------|--------|-----------------------------|
| 23.1  | 1454.6691 | 0.0008 | <a href="#">NGRENFYQNWK</a> |

Mascot: <http://www.matrixscience.com/>

# Mascot Search Results

## Peptide View

MS/MS Fragmentation of **NGRENFYQNWK**

Found in **P24821** in **uni\_human\_nr**, TENA\_HUMAN Tenascin OS=Homo sapiens GN=TNC PE=1 SV=3

Match to Query 4283: 1454.670988 from(728.342770,2+) intensity(8415359.0000) rtinseconds(1223) scans(5851) index(3799)

Title: 130809\_HPL\_Human\_Plaque\_BR1\_TR3\_02\_Spectrum028325\_scans\_5851\_RTINSECONDS=1223

Data file E:\RAW\HumanPlaques\mgf\T\1D\T130809\_HPL\_Human\_Plaque\_BR1\_TR3\_02.mgf

Click mouse within plot area to zoom in by factor of two about that point

Or,  to  Da

Label all possible matches  Label matches used for scoring

Show Y-axis

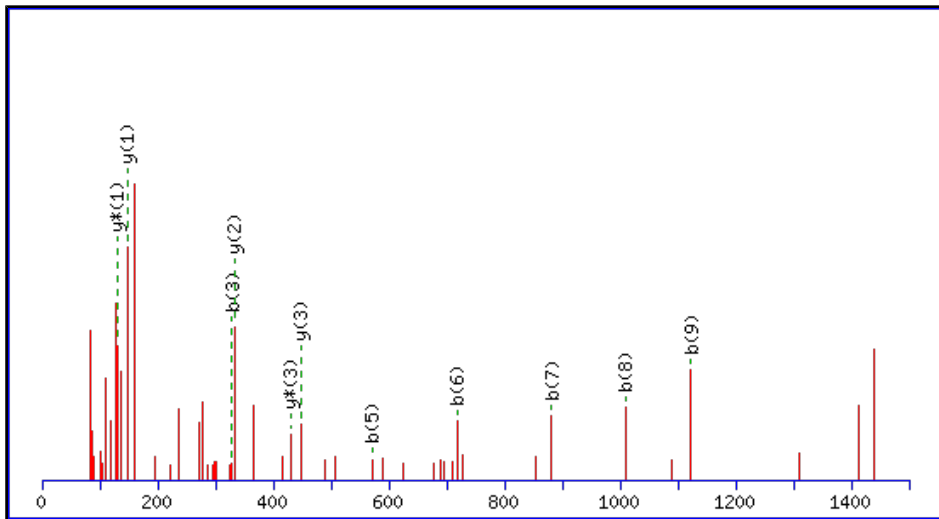

**Monoisotopic mass of neutral peptide Mr(calc):** 1454.6691

**Fixed modifications:** Carbamidomethyl (C) (apply to specified residues or termini only)

**Ions Score:** 19 **Expect:** 0.65

**Matches:** 11/100 fragment ions using 38 most intense peaks ([help](#))

| #  | b                | b <sup>++</sup> | b <sup>*</sup> | b <sup>*++</sup> | b <sup>0</sup> | b <sup>0++</sup> | Seq. | y               | y <sup>++</sup> | y <sup>*</sup>  | y <sup>*++</sup> | y <sup>0</sup> | y <sup>0++</sup> | #  |
|----|------------------|-----------------|----------------|------------------|----------------|------------------|------|-----------------|-----------------|-----------------|------------------|----------------|------------------|----|
| 1  | 115.0502         | 58.0287         | 98.0237        | 49.5155          |                |                  | N    |                 |                 |                 |                  |                |                  | 11 |
| 2  | 172.0717         | 86.5395         | 155.0451       | 78.0262          |                |                  | G    | 1341.6335       | 671.3204        | 1324.6069       | 662.8071         | 1323.6229      | 662.3151         | 10 |
| 3  | <b>328.1728</b>  | 164.5900        | 311.1462       | 156.0768         |                |                  | R    | 1284.6120       | 642.8096        | 1267.5854       | 634.2964         | 1266.6014      | 633.8044         | 9  |
| 4  | 457.2154         | 229.1113        | 440.1888       | 220.5980         | 439.2048       | 220.1060         | E    | 1128.5109       | 564.7591        | 1111.4843       | 556.2458         | 1110.5003      | 555.7538         | 8  |
| 5  | <b>571.2583</b>  | 286.1328        | 554.2317       | 277.6195         | 553.2477       | 277.1275         | N    | 999.4683        | 500.2378        | 982.4417        | 491.7245         |                |                  | 7  |
| 6  | <b>718.3267</b>  | 359.6670        | 701.3002       | 351.1537         | 700.3161       | 350.6617         | F    | 885.4254        | 443.2163        | 868.3988        | 434.7030         |                |                  | 6  |
| 7  | <b>881.3900</b>  | 441.1987        | 864.3635       | 432.6854         | 863.3795       | 432.1934         | Y    | 738.3570        | 369.6821        | 721.3304        | 361.1688         |                |                  | 5  |
| 8  | <b>1009.4486</b> | 505.2279        | 992.4221       | 496.7147         | 991.4381       | 496.2227         | Q    | 575.2936        | 288.1504        | 558.2671        | 279.6372         |                |                  | 4  |
| 9  | <b>1123.4915</b> | 562.2494        | 1106.4650      | 553.7361         | 1105.4810      | 553.2441         | N    | <b>447.2350</b> | 224.1212        | <b>430.2085</b> | 215.6079         |                |                  | 3  |
| 10 | 1309.5709        | 655.2891        | 1292.5443      | 646.7758         | 1291.5603      | 646.2838         | W    | <b>333.1921</b> | 167.0997        | 316.1656        | 158.5864         |                |                  | 2  |
| 11 |                  |                 |                |                  |                |                  | K    | <b>147.1128</b> | 74.0600         | <b>130.0863</b> | 65.5468          |                |                  | 1  |



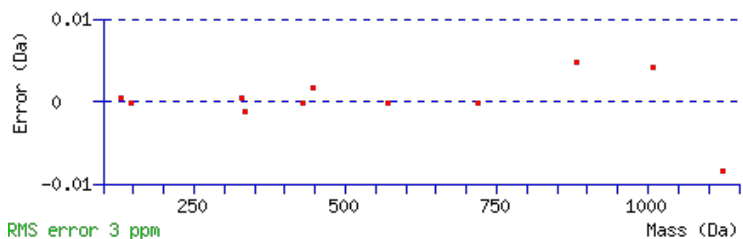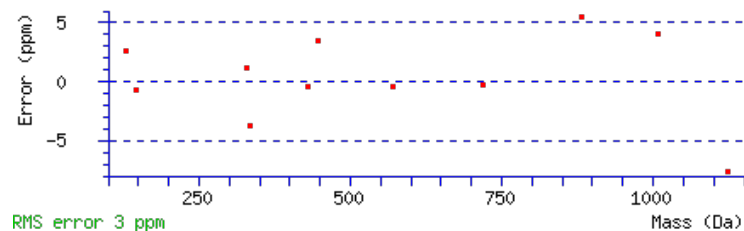

NCBI BLAST search of [NGRENFYQNWK](#)

(Parameters: blastp, nr protein database, expect=20000, no filter, PAM30)

Other BLAST [web gateways](#)

**All matches to this query**

| Score | Mr(calc)  | Delta  | Sequence                    |
|-------|-----------|--------|-----------------------------|
| 18.9  | 1454.6691 | 0.0019 | <a href="#">NGRENFYQNWK</a> |

Mascot: <http://www.matrixscience.com/>

# Mascot Search Results

## Peptide View

MS/MS Fragmentation of **VEGYSGTAGDSMAYHNGR**

Found in **P24821** in **uni\_human\_nr**, TENA\_HUMAN Tenascin OS=Homo sapiens GN=TNC PE=1 SV=3

Match to Query 7542: 1886.786292 from(629.936040,3+) intensity(951566.1875) rtinseconds(969) scans(3843) index(2006)

Title: 130801\_HPL\_Human\_Plaque\_BR1\_TR1\_04\_Spectrum025004\_scans\_3843\_RTINSECONDS=969

Data file E:\RAW\HumanPlaques\mgf\T\1D\T130801\_HPL\_Human\_Plaque\_BR1\_TR1\_04.mgf

Click mouse within plot area to zoom in by factor of two about that point

Or,  to  Da

Label all possible matches  Label matches used for scoring

Show Y-axis

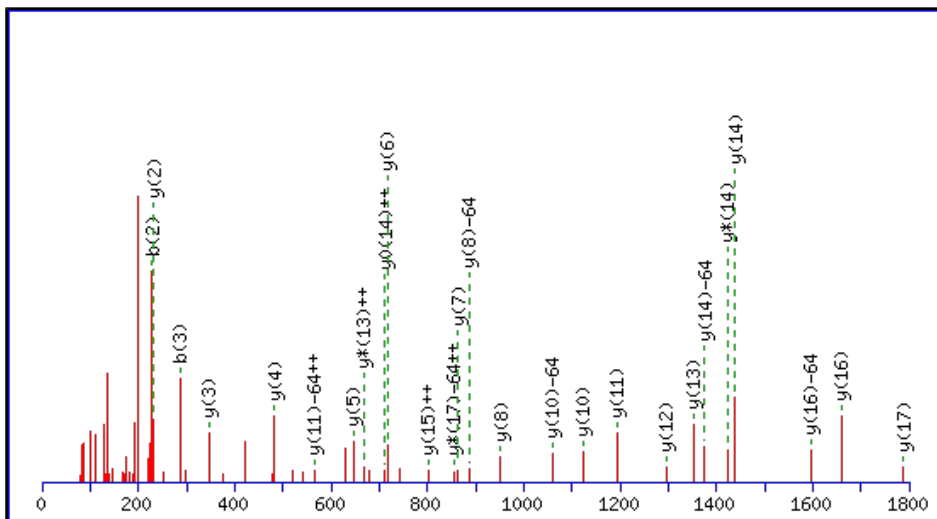

**Monoisotopic mass of neutral peptide Mr(calc):** 1886.7853

**Fixed modifications:** Carbamidomethyl (C) (apply to specified residues or termini only)

**Variable modifications:**

**M12** : Oxidation (M), with neutral losses 0.0000(shown in table), 63.9983

**Ions Score:** 120 **Expect:** 1.2e-011

**Matches** : 26/250 fragment ions using 37 most intense peaks ([help](#))

| #  | b               | b <sup>++</sup> | b <sup>*</sup> | b <sup>*++</sup> | b <sup>0</sup> | b <sup>0++</sup> | Seq. | y                | y <sup>++</sup> | y <sup>*</sup>   | y <sup>*++</sup> | y <sup>0</sup> | y <sup>0++</sup> | #  |
|----|-----------------|-----------------|----------------|------------------|----------------|------------------|------|------------------|-----------------|------------------|------------------|----------------|------------------|----|
| 1  | 100.0757        | 50.5415         |                |                  |                |                  | V    |                  |                 |                  |                  |                |                  | 18 |
| 2  | <b>229.1183</b> | 115.0628        |                |                  | 211.1077       | 106.0575         | E    | <b>1788.7242</b> | 894.8657        | 1771.6977        | 886.3525         | 1770.7136      | 885.8605         | 17 |
| 3  | <b>286.1397</b> | 143.5735        |                |                  | 268.1292       | 134.5682         | G    | <b>1659.6816</b> | 830.3444        | 1642.6551        | 821.8312         | 1641.6710      | 821.3392         | 16 |
| 4  | 449.2031        | 225.1052        |                |                  | 431.1925       | 216.0999         | Y    | 1602.6601        | <b>801.8337</b> | 1585.6336        | 793.3204         | 1584.6496      | 792.8284         | 15 |
| 5  | 536.2351        | 268.6212        |                |                  | 518.2245       | 259.6159         | S    | <b>1439.5968</b> | 720.3020        | <b>1422.5703</b> | 711.7888         | 1421.5863      | <b>711.2968</b>  | 14 |
| 6  | 593.2566        | 297.1319        |                |                  | 575.2460       | 288.1266         | G    | <b>1352.5648</b> | 676.7860        | 1335.5382        | <b>668.2728</b>  | 1334.5542      | 667.7808         | 13 |
| 7  | 694.3042        | 347.6558        |                |                  | 676.2937       | 338.6505         | T    | <b>1295.5433</b> | 648.2753        | 1278.5168        | 639.7620         | 1277.5328      | 639.2700         | 12 |
| 8  | 765.3414        | 383.1743        |                |                  | 747.3308       | 374.1690         | A    | <b>1194.4956</b> | 597.7515        | 1177.4691        | 589.2382         | 1176.4851      | 588.7462         | 11 |
| 9  | 822.3628        | 411.6851        |                |                  | 804.3523       | 402.6798         | G    | <b>1123.4585</b> | 562.2329        | 1106.4320        | 553.7196         | 1105.4480      | 553.2276         | 10 |
| 10 | 937.3898        | 469.1985        |                |                  | 919.3792       | 460.1932         | D    | 1066.4371        | 533.7222        | 1049.4105        | 525.2089         | 1048.4265      | 524.7169         | 9  |
| 11 | 1024.4218       | 512.7145        |                |                  | 1006.4112      | 503.7093         | S    | <b>951.4101</b>  | 476.2087        | 934.3836         | 467.6954         | 933.3996       | 467.2034         | 8  |
| 12 | 1171.4572       | 586.2322        |                |                  | 1153.4466      | 577.2270         | M    | <b>864.3781</b>  | 432.6927        | 847.3515         | 424.1794         |                |                  | 7  |
| 13 | 1242.4943       | 621.7508        |                |                  | 1224.4837      | 612.7455         | A    | <b>717.3427</b>  | 359.1750        | 700.3161         | 350.6617         |                |                  | 6  |
| 14 | 1405.5576       | 703.2825        |                |                  | 1387.5471      | 694.2772         | Y    | <b>646.3056</b>  | 323.6564        | 629.2790         | 315.1432         |                |                  | 5  |
| 15 | 1542.6166       | 771.8119        |                |                  | 1524.6060      | 762.8066         | H    | <b>483.2423</b>  | 242.1248        | 466.2157         | 233.6115         |                |                  | 4  |

|    |           |          |           |          |           |          |   |          |          |          |          |  |  |   |
|----|-----------|----------|-----------|----------|-----------|----------|---|----------|----------|----------|----------|--|--|---|
| 16 | 1656.6595 | 828.8334 | 1639.6329 | 820.3201 | 1638.6489 | 819.8281 | N | 346.1833 | 173.5953 | 329.1568 | 165.0820 |  |  | 3 |
| 17 | 1713.6809 | 857.3441 | 1696.6544 | 848.8308 | 1695.6704 | 848.3388 | G | 232.1404 | 116.5738 | 215.1139 | 108.0606 |  |  | 2 |
| 18 |           |          |           |          |           |          | R | 175.1190 | 88.0631  | 158.0924 | 79.5498  |  |  | 1 |

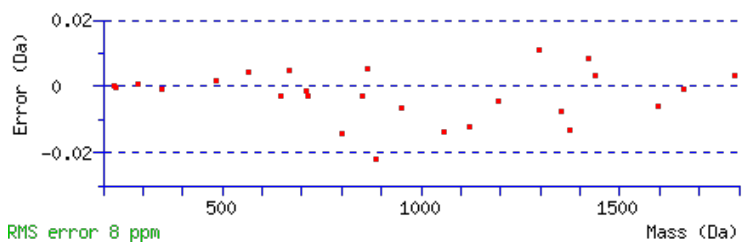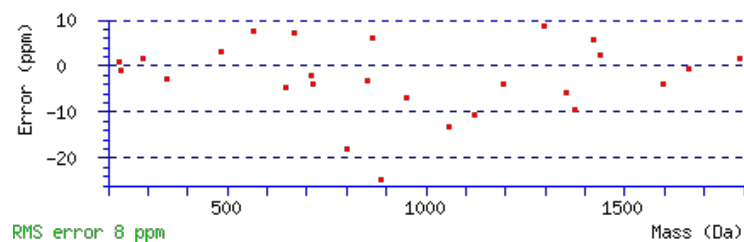

NCBI BLAST search of [VEGYSGTAGDSMAYHNGR](#)  
 (Parameters: blastp, nr protein database, expect=20000, no filter, PAM30)  
 Other BLAST [web gateways](#)

All matches to this query

| Score | Mr(calc)  | Delta  | Sequence                           |
|-------|-----------|--------|------------------------------------|
| 119.7 | 1886.7853 | 0.0010 | <a href="#">VEGYSGTAGDSMAYHNGR</a> |

Mascot: <http://www.matrixscience.com/>

# Mascot Search Results

## Peptide View

MS/MS Fragmentation of **VEGYSGTAGDSMAYHNGR**

Found in **P24821** in **uni\_human\_nr**, TENA\_HUMAN Tenascin OS=Homo sapiens GN=TNC PE=1 SV=3

Match to Query 5981: 1871.774202 from(624.932010,3+) intensity(764445.6875) rtinseconds(1368) scans(6230) index(3921)

Title: 130801\_HPL\_Human\_Plaque\_BR2\_TR1\_11\_Spectrum024108\_scans\_6230\_RTINSECONDS=1368

Data file E:\RAW\HumanPlaques\mgf\T\1D\T130801\_HPL\_Human\_Plaque\_BR2\_TR1\_11.mgf

Click mouse within plot area to zoom in by factor of two about that point

Or,  to  Da

Label all possible matches  Label matches used for scoring

Show Y-axis

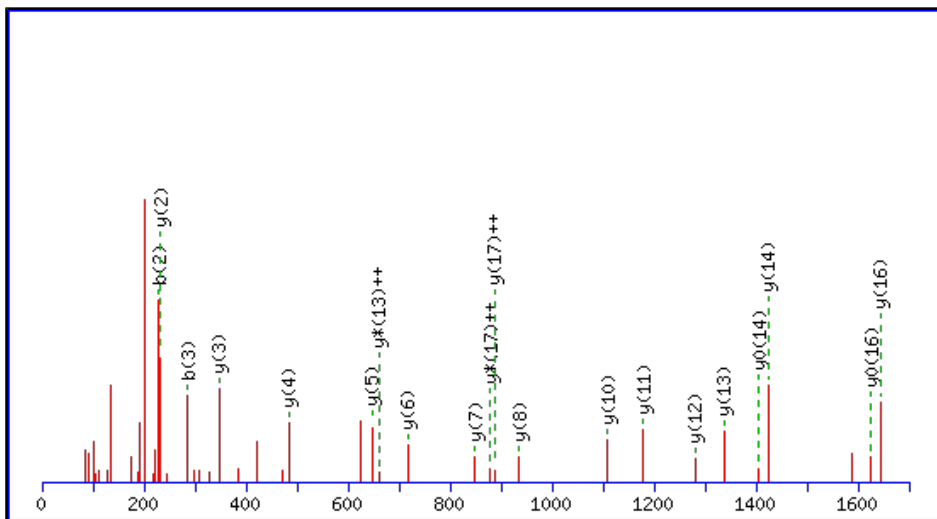

**Monoisotopic mass of neutral peptide Mr(calc):** 1871.7744

**Fixed modifications:** Carbamidomethyl (C) (apply to specified residues or termini only)

**Variable modifications:**

N16 : Deamidated (NQ)

**Ions Score:** 108 **Expect:** 1.7e-010

**Matches :** 20/158 fragment ions using 31 most intense peaks ([help](#))

| #  | b               | b <sup>++</sup> | b <sup>*</sup> | b <sup>*++</sup> | b <sup>0</sup> | b <sup>0++</sup> | Seq. | y                | y <sup>++</sup> | y <sup>*</sup> | y <sup>*++</sup> | y <sup>0</sup>   | y <sup>0++</sup> | #  |
|----|-----------------|-----------------|----------------|------------------|----------------|------------------|------|------------------|-----------------|----------------|------------------|------------------|------------------|----|
| 1  | 100.0757        | 50.5415         |                |                  |                |                  | V    |                  |                 |                |                  |                  |                  | 18 |
| 2  | <b>229.1183</b> | 115.0628        |                |                  | 211.1077       | 106.0575         | E    | 1773.7133        | <b>887.3603</b> | 1756.6868      | <b>878.8470</b>  | 1755.7027        | 878.3550         | 17 |
| 3  | <b>286.1397</b> | 143.5735        |                |                  | 268.1292       | 134.5682         | G    | <b>1644.6707</b> | 822.8390        | 1627.6442      | 814.3257         | <b>1626.6601</b> | 813.8337         | 16 |
| 4  | 449.2031        | 225.1052        |                |                  | 431.1925       | 216.0999         | Y    | 1587.6492        | 794.3283        | 1570.6227      | 785.8150         | 1569.6387        | 785.3230         | 15 |
| 5  | 536.2351        | 268.6212        |                |                  | 518.2245       | 259.6159         | S    | <b>1424.5859</b> | 712.7966        | 1407.5594      | 704.2833         | <b>1406.5754</b> | 703.7913         | 14 |
| 6  | 593.2566        | 297.1319        |                |                  | 575.2460       | 288.1266         | G    | <b>1337.5539</b> | 669.2806        | 1320.5273      | <b>660.7673</b>  | 1319.5433        | 660.2753         | 13 |
| 7  | 694.3042        | 347.6558        |                |                  | 676.2937       | 338.6505         | T    | <b>1280.5324</b> | 640.7699        | 1263.5059      | 632.2566         | 1262.5219        | 631.7646         | 12 |
| 8  | 765.3414        | 383.1743        |                |                  | 747.3308       | 374.1690         | A    | <b>1179.4847</b> | 590.2460        | 1162.4582      | 581.7327         | 1161.4742        | 581.2407         | 11 |
| 9  | 822.3628        | 411.6851        |                |                  | 804.3523       | 402.6798         | G    | <b>1108.4476</b> | 554.7275        | 1091.4211      | 546.2142         | 1090.4371        | 545.7222         | 10 |
| 10 | 937.3898        | 469.1985        |                |                  | 919.3792       | 460.1932         | D    | 1051.4262        | 526.2167        | 1034.3996      | 517.7034         | 1033.4156        | 517.2114         | 9  |
| 11 | 1024.4218       | 512.7145        |                |                  | 1006.4112      | 503.7093         | S    | <b>936.3992</b>  | 468.7033        | 919.3727       | 460.1900         | 918.3887         | 459.6980         | 8  |
| 12 | 1155.4623       | 578.2348        |                |                  | 1137.4517      | 569.2295         | M    | <b>849.3672</b>  | 425.1872        | 832.3406       | 416.6740         |                  |                  | 7  |
| 13 | 1226.4994       | 613.7533        |                |                  | 1208.4888      | 604.7481         | A    | <b>718.3267</b>  | 359.6670        | 701.3002       | 351.1537         |                  |                  | 6  |
| 14 | 1389.5627       | 695.2850        |                |                  | 1371.5522      | 686.2797         | Y    | <b>647.2896</b>  | 324.1484        | 630.2631       | 315.6352         |                  |                  | 5  |
| 15 | 1526.6216       | 763.8145        |                |                  | 1508.6111      | 754.8092         | H    | <b>484.2263</b>  | 242.6168        | 467.1997       | 234.1035         |                  |                  | 4  |

|           |           |          |           |          |           |          |          |                 |          |          |          |  |  |          |
|-----------|-----------|----------|-----------|----------|-----------|----------|----------|-----------------|----------|----------|----------|--|--|----------|
| <b>16</b> | 1641.6486 | 821.3279 | 1624.6220 | 812.8147 | 1623.6380 | 812.3226 | <b>N</b> | <b>347.1674</b> | 174.0873 | 330.1408 | 165.5740 |  |  | <b>3</b> |
| <b>17</b> | 1698.6700 | 849.8387 | 1681.6435 | 841.3254 | 1680.6595 | 840.8334 | <b>G</b> | <b>232.1404</b> | 116.5738 | 215.1139 | 108.0606 |  |  | <b>2</b> |
| <b>18</b> |           |          |           |          |           |          | <b>R</b> | 175.1190        | 88.0631  | 158.0924 | 79.5498  |  |  | <b>1</b> |

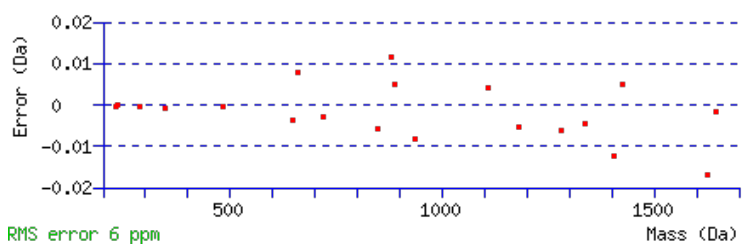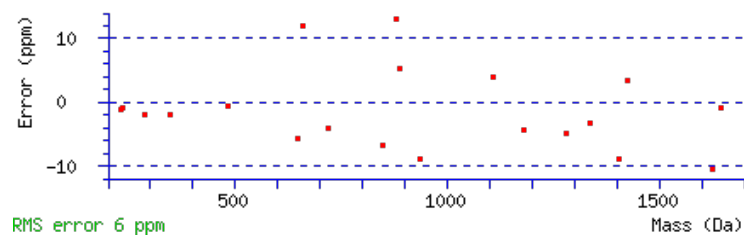

NCBI BLAST search of [VEGYSGTAGDSMAYHNGR](#)  
 (Parameters: blastp, nr protein database, expect=20000, no filter, PAM30)  
 Other BLAST [web gateways](#)

**All matches to this query**

| Score | Mr(calc)  | Delta   | Sequence                           |
|-------|-----------|---------|------------------------------------|
| 107.6 | 1871.7744 | -0.0002 | <a href="#">VEGYSGTAGDSMAYHNGR</a> |

Mascot: <http://www.matrixscience.com/>

# Mascot Search Results

## Peptide View

MS/MS Fragmentation of **VEGYSGTAGDSMAYHNGR**

Found in **P24821** in **uni\_human\_nr**, TENA\_HUMAN Tenascin OS=Homo sapiens GN=TNC PE=1 SV=3

Match to Query 7735: 1870.79008 from(936.402280,2+) intensity(7641343.5000) rtinseconds(1186) scans(5462) index(3484)

Title: 130801\_HPL\_Human\_Plaque\_BR2\_TR1\_04\_Spectrum026058\_scans\_5462\_RTINSECONDS=1186

Data file E:\RAW\HumanPlaques\mgf\T\1D\T130801\_HPL\_Human\_Plaque\_BR2\_TR1\_04.mgf

Click mouse within plot area to zoom in by factor of two about that point

Or,  to  Da

Label all possible matches  Label matches used for scoring

Show Y-axis

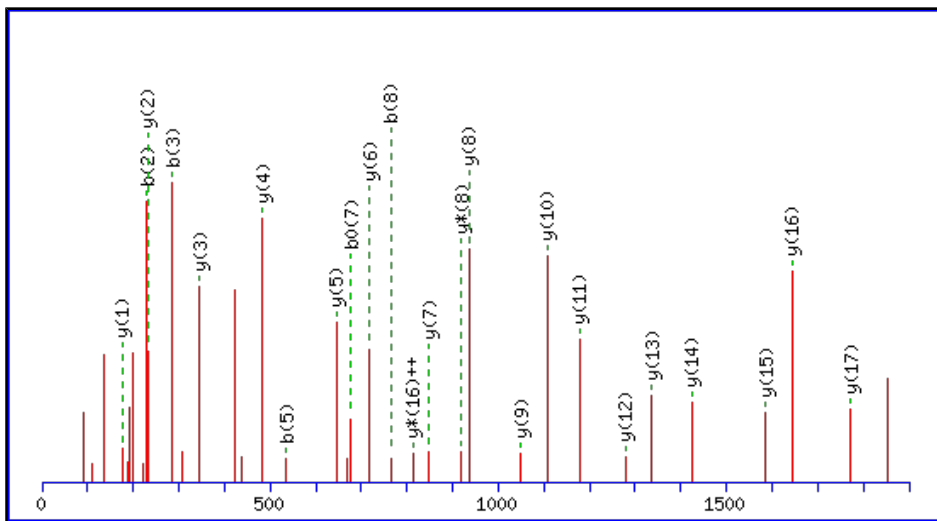

Monoisotopic mass of neutral peptide **Mr(calc)**: 1870.7904

Fixed modifications: Carbamidomethyl (C) (apply to specified residues or termini only)

Ions Score: 182 Expect: 1.1e-017

Matches : 24/158 fragment ions using 32 most intense peaks ([help](#))

| #  | b               | b <sup>++</sup> | b*        | b <sup>*++</sup> | b <sup>0</sup>  | b <sup>0++</sup> | Seq. | y                | y <sup>++</sup> | y*              | y <sup>*++</sup> | y <sup>0</sup> | y <sup>0++</sup> | #  |
|----|-----------------|-----------------|-----------|------------------|-----------------|------------------|------|------------------|-----------------|-----------------|------------------|----------------|------------------|----|
| 1  | 100.0757        | 50.5415         |           |                  |                 |                  | V    |                  |                 |                 |                  |                |                  | 18 |
| 2  | <b>229.1183</b> | 115.0628        |           |                  | 211.1077        | 106.0575         | E    | <b>1772.7293</b> | 886.8683        | 1755.7027       | 878.3550         | 1754.7187      | 877.8630         | 17 |
| 3  | <b>286.1397</b> | 143.5735        |           |                  | 268.1292        | 134.5682         | G    | <b>1643.6867</b> | 822.3470        | 1626.6601       | <b>813.8337</b>  | 1625.6761      | 813.3417         | 16 |
| 4  | 449.2031        | 225.1052        |           |                  | 431.1925        | 216.0999         | Y    | <b>1586.6652</b> | 793.8363        | 1569.6387       | 785.3230         | 1568.6547      | 784.8310         | 15 |
| 5  | <b>536.2351</b> | 268.6212        |           |                  | 518.2245        | 259.6159         | S    | <b>1423.6019</b> | 712.3046        | 1406.5754       | 703.7913         | 1405.5913      | 703.2993         | 14 |
| 6  | 593.2566        | 297.1319        |           |                  | 575.2460        | 288.1266         | G    | <b>1336.5699</b> | 668.7886        | 1319.5433       | 660.2753         | 1318.5593      | 659.7833         | 13 |
| 7  | 694.3042        | 347.6558        |           |                  | <b>676.2937</b> | 338.6505         | T    | <b>1279.5484</b> | 640.2778        | 1262.5219       | 631.7646         | 1261.5378      | 631.2726         | 12 |
| 8  | <b>765.3414</b> | 383.1743        |           |                  | 747.3308        | 374.1690         | A    | <b>1178.5007</b> | 589.7540        | 1161.4742       | 581.2407         | 1160.4902      | 580.7487         | 11 |
| 9  | 822.3628        | 411.6851        |           |                  | 804.3523        | 402.6798         | G    | <b>1107.4636</b> | 554.2354        | 1090.4371       | 545.7222         | 1089.4531      | 545.2302         | 10 |
| 10 | 937.3898        | 469.1985        |           |                  | 919.3792        | 460.1932         | D    | <b>1050.4422</b> | 525.7247        | 1033.4156       | 517.2114         | 1032.4316      | 516.7194         | 9  |
| 11 | 1024.4218       | 512.7145        |           |                  | 1006.4112       | 503.7093         | S    | <b>935.4152</b>  | 468.2112        | <b>918.3887</b> | 459.6980         | 917.4046       | 459.2060         | 8  |
| 12 | 1155.4623       | 578.2348        |           |                  | 1137.4517       | 569.2295         | M    | <b>848.3832</b>  | 424.6952        | 831.3566        | 416.1820         |                |                  | 7  |
| 13 | 1226.4994       | 613.7533        |           |                  | 1208.4888       | 604.7481         | A    | <b>717.3427</b>  | 359.1750        | 700.3161        | 350.6617         |                |                  | 6  |
| 14 | 1389.5627       | 695.2850        |           |                  | 1371.5522       | 686.2797         | Y    | <b>646.3056</b>  | 323.6564        | 629.2790        | 315.1432         |                |                  | 5  |
| 15 | 1526.6216       | 763.8145        |           |                  | 1508.6111       | 754.8092         | H    | <b>483.2423</b>  | 242.1248        | 466.2157        | 233.6115         |                |                  | 4  |
| 16 | 1640.6646       | 820.8359        | 1623.6380 | 812.3226         | 1622.6540       | 811.8306         | N    | <b>346.1833</b>  | 173.5953        | 329.1568        | 165.0820         |                |                  | 3  |

|    |           |          |           |          |           |          |   |          |          |          |          |  |  |   |
|----|-----------|----------|-----------|----------|-----------|----------|---|----------|----------|----------|----------|--|--|---|
| 17 | 1697.6860 | 849.3467 | 1680.6595 | 840.8334 | 1679.6755 | 840.3414 | G | 232.1404 | 116.5738 | 215.1139 | 108.0606 |  |  | 2 |
| 18 |           |          |           |          |           |          | R | 175.1190 | 88.0631  | 158.0924 | 79.5498  |  |  | 1 |

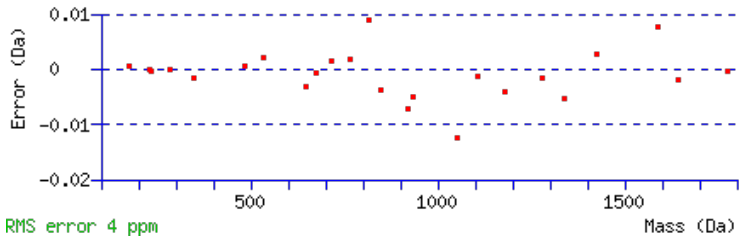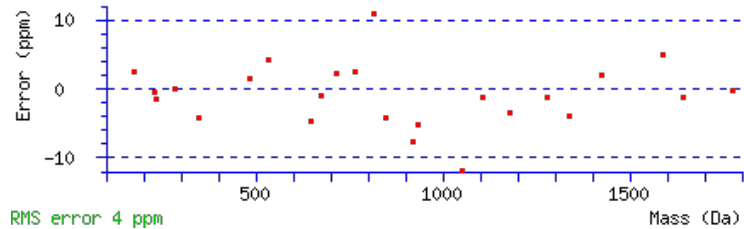

NCBI BLAST search of [VEGYSGTAGDSMAYHNGR](#)  
 (Parameters: blastp, nr protein database, expect=20000, no filter, PAM30)  
 Other BLAST [web gateways](#)

All matches to this query

| Score | Mr(calc)  | Delta   | Sequence                           |
|-------|-----------|---------|------------------------------------|
| 182.1 | 1870.7904 | -0.0004 | <a href="#">VEGYSGTAGDSMAYHNGR</a> |

Mascot: <http://www.matrixscience.com/>

# Mascot Search Results

## Peptide View

MS/MS Fragmentation of **VEGYSGTAGDSMAYHNGR**

Found in **P24821** in **uni\_human\_nr**, TENA\_HUMAN Tenascin OS=Homo sapiens GN=TNC PE=1 SV=3

Match to Query 7736: 1870.791282 from(624.604370,3+) intensity(76699016.0000) rtinseconds(1186) scans(5466) index(3488)

Title: 130801\_HPL\_Human\_Plaque\_BR2\_TR1\_04\_Spectrum026062\_scans\_5466\_RTINSECONDS=1186

Data file E:\RAW\HumanPlaques\mgf\T\1D\T130801\_HPL\_Human\_Plaque\_BR2\_TR1\_04.mgf

Click mouse within plot area to zoom in by factor of two about that point

Or,  to  Da

Label all possible matches  Label matches used for scoring

Show Y-axis

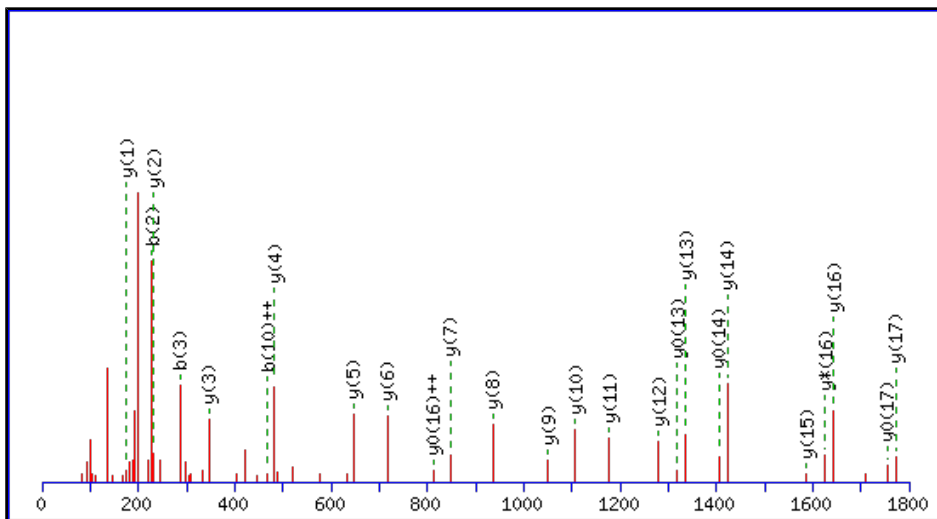

Monoisotopic mass of neutral peptide **Mr(calc)**: 1870.7904

Fixed modifications: Carbamidomethyl (C) (apply to specified residues or termini only)

Ions Score: 148 Expect: 2.7e-014

Matches : 25/158 fragment ions using 46 most intense peaks ([help](#))

| #  | b               | b <sup>++</sup> | b <sup>*</sup> | b <sup>*++</sup> | b <sup>0</sup> | b <sup>0++</sup> | Seq. | y                | y <sup>++</sup> | y <sup>*</sup>   | y <sup>*++</sup> | y <sup>0</sup>   | y <sup>0++</sup> | #  |
|----|-----------------|-----------------|----------------|------------------|----------------|------------------|------|------------------|-----------------|------------------|------------------|------------------|------------------|----|
| 1  | 100.0757        | 50.5415         |                |                  |                |                  | V    |                  |                 |                  |                  |                  |                  | 18 |
| 2  | <b>229.1183</b> | 115.0628        |                |                  | 211.1077       | 106.0575         | E    | <b>1772.7293</b> | 886.8683        | 1755.7027        | 878.3550         | <b>1754.7187</b> | 877.8630         | 17 |
| 3  | <b>286.1397</b> | 143.5735        |                |                  | 268.1292       | 134.5682         | G    | <b>1643.6867</b> | 822.3470        | <b>1626.6601</b> | 813.8337         | 1625.6761        | <b>813.3417</b>  | 16 |
| 4  | 449.2031        | 225.1052        |                |                  | 431.1925       | 216.0999         | Y    | <b>1586.6652</b> | 793.8363        | 1569.6387        | 785.3230         | 1568.6547        | 784.8310         | 15 |
| 5  | 536.2351        | 268.6212        |                |                  | 518.2245       | 259.6159         | S    | <b>1423.6019</b> | 712.3046        | 1406.5754        | 703.7913         | <b>1405.5913</b> | 703.2993         | 14 |
| 6  | 593.2566        | 297.1319        |                |                  | 575.2460       | 288.1266         | G    | <b>1336.5699</b> | 668.7886        | 1319.5433        | 660.2753         | <b>1318.5593</b> | 659.7833         | 13 |
| 7  | 694.3042        | 347.6558        |                |                  | 676.2937       | 338.6505         | T    | <b>1279.5484</b> | 640.2778        | 1262.5219        | 631.7646         | 1261.5378        | 631.2726         | 12 |
| 8  | 765.3414        | 383.1743        |                |                  | 747.3308       | 374.1690         | A    | <b>1178.5007</b> | 589.7540        | 1161.4742        | 581.2407         | 1160.4902        | 580.7487         | 11 |
| 9  | 822.3628        | 411.6851        |                |                  | 804.3523       | 402.6798         | G    | <b>1107.4636</b> | 554.2354        | 1090.4371        | 545.7222         | 1089.4531        | 545.2302         | 10 |
| 10 | 937.3898        | <b>469.1985</b> |                |                  | 919.3792       | 460.1932         | D    | <b>1050.4422</b> | 525.7247        | 1033.4156        | 517.2114         | 1032.4316        | 516.7194         | 9  |
| 11 | 1024.4218       | 512.7145        |                |                  | 1006.4112      | 503.7093         | S    | <b>935.4152</b>  | 468.2112        | 918.3887         | 459.6980         | 917.4046         | 459.2060         | 8  |
| 12 | 1155.4623       | 578.2348        |                |                  | 1137.4517      | 569.2295         | M    | <b>848.3832</b>  | 424.6952        | 831.3566         | 416.1820         |                  |                  | 7  |
| 13 | 1226.4994       | 613.7533        |                |                  | 1208.4888      | 604.7481         | A    | <b>717.3427</b>  | 359.1750        | 700.3161         | 350.6617         |                  |                  | 6  |
| 14 | 1389.5627       | 695.2850        |                |                  | 1371.5522      | 686.2797         | Y    | <b>646.3056</b>  | 323.6564        | 629.2790         | 315.1432         |                  |                  | 5  |
| 15 | 1526.6216       | 763.8145        |                |                  | 1508.6111      | 754.8092         | H    | <b>483.2423</b>  | 242.1248        | 466.2157         | 233.6115         |                  |                  | 4  |
| 16 | 1640.6646       | 820.8359        | 1623.6380      | 812.3226         | 1622.6540      | 811.8306         | N    | <b>346.1833</b>  | 173.5953        | 329.1568         | 165.0820         |                  |                  | 3  |



|    |           |          |           |          |           |          |   |          |          |          |          |  |  |   |
|----|-----------|----------|-----------|----------|-----------|----------|---|----------|----------|----------|----------|--|--|---|
| 17 | 1697.6860 | 849.3467 | 1680.6595 | 840.8334 | 1679.6755 | 840.3414 | G | 232.1404 | 116.5738 | 215.1139 | 108.0606 |  |  | 2 |
| 18 |           |          |           |          |           |          | R | 175.1190 | 88.0631  | 158.0924 | 79.5498  |  |  | 1 |

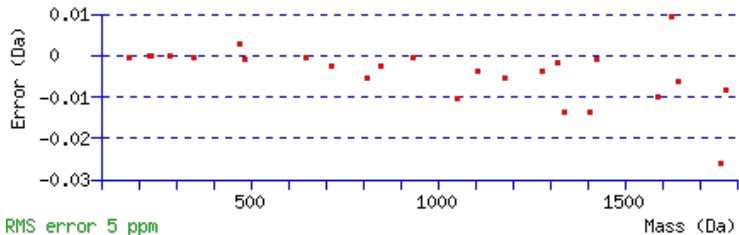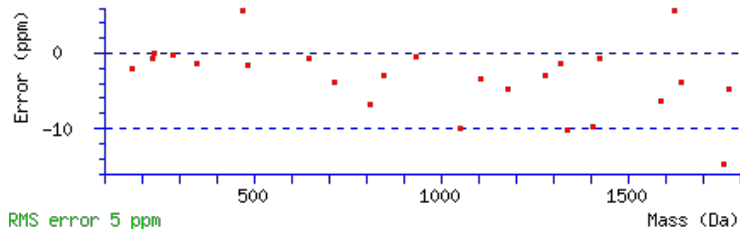

NCBI BLAST search of [VEGYSGTAGDSMAYHNGR](#)  
 (Parameters: blastp, nr protein database, expect=20000, no filter, PAM30)  
 Other BLAST [web gateways](#)

All matches to this query

| Score | Mr(calc)  | Delta  | Sequence                           |
|-------|-----------|--------|------------------------------------|
| 148.3 | 1870.7904 | 0.0009 | <a href="#">VEGYSGTAGDSMAYHNGR</a> |

Mascot: <http://www.matrixscience.com/>

# Mascot Search Results

## Peptide View

MS/MS Fragmentation of **YKLKVEGYSGTAGDSMAYHNGR**

Found in **P24821** in **uni\_human\_nr**, TENA\_HUMAN Tenascin OS=Homo sapiens GN=TNC PE=1 SV=3

Match to Query 13601: 2419.113976 from(605.785770,4+) intensity(4479103.5000) rtinseconds(1133) scans(4881) index(2802)

Title: 130801\_HPL\_Human\_Plaque\_BR1\_TR1\_02\_Spectrum026809\_scans\_4881\_RTINSECONDS=1133

Data file E:\\RAW\\HumanPlaques\\imgf\\T\\1D\\T130801\_HPL\_Human\_Plaque\_BR1\_TR1\_02.mgf

Click mouse within plot area to zoom in by factor of two about that point

Or,  to  Da

Label all possible matches  Label matches used for scoring

Show Y-axis

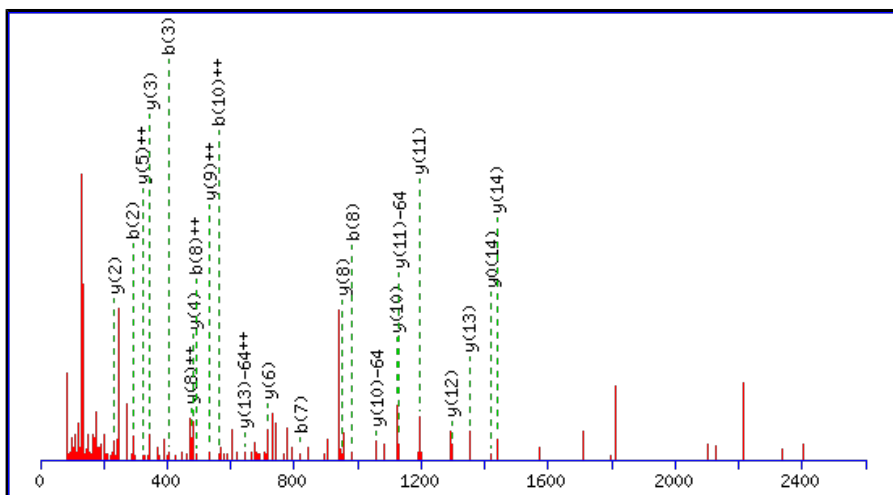

Monoisotopic mass of neutral peptide **Mr(calc)**: 2419.1226

Fixed modifications: Carbamidomethyl (C) (apply to specified residues or termini only)

Variable modifications:

M16 : Oxidation (M), with neutral losses 0.0000(shown in table), 63.9983

Ions Score: 28 Expect: 0.091

Matches : 23/350 fragment ions using 73 most intense peaks ([help](#))

| #  | b               | b <sup>++</sup> | b <sup>*</sup> | b <sup>***</sup> | b <sup>0</sup> | b <sup>0++</sup> | Seq. | y                | y <sup>++</sup> | y <sup>*</sup> | y <sup>***</sup> | y <sup>0</sup>   | y <sup>0++</sup> | #  |
|----|-----------------|-----------------|----------------|------------------|----------------|------------------|------|------------------|-----------------|----------------|------------------|------------------|------------------|----|
| 1  | 164.0706        | 82.5389         |                |                  |                |                  | Y    |                  |                 |                |                  |                  |                  | 22 |
| 2  | <b>292.1656</b> | 146.5864        | 275.1390       | 138.0731         |                |                  | K    | 2257.0666        | 1129.0369       | 2240.0401      | 1120.5237        | 2239.0560        | 1120.0317        | 21 |
| 3  | <b>405.2496</b> | 203.1285        | 388.2231       | 194.6152         |                |                  | L    | 2128.9716        | 1064.9895       | 2111.9451      | 1056.4762        | 2110.9611        | 1055.9842        | 20 |
| 4  | 533.3446        | 267.1759        | 516.3180       | 258.6627         |                |                  | K    | 2015.8876        | 1008.4474       | 1998.8610      | 999.9342         | 1997.8770        | 999.4421         | 19 |
| 5  | 632.4130        | 316.7101        | 615.3865       | 308.1969         |                |                  | V    | 1887.7926        | 944.3999        | 1870.7661      | 935.8867         | 1869.7821        | 935.3947         | 18 |
| 6  | 761.4556        | 381.2314        | 744.4291       | 372.7182         | 743.4450       | 372.2262         | E    | 1788.7242        | 894.8657        | 1771.6977      | 886.3525         | 1770.7136        | 885.8605         | 17 |
| 7  | <b>818.4771</b> | 409.7422        | 801.4505       | 401.2289         | 800.4665       | 400.7369         | G    | 1659.6816        | 830.3444        | 1642.6551      | 821.8312         | 1641.6710        | 821.3392         | 16 |
| 8  | <b>981.5404</b> | <b>491.2738</b> | 964.5138       | 482.7606         | 963.5298       | 482.2686         | Y    | 1602.6601        | 801.8337        | 1585.6336      | 793.3204         | 1584.6496        | 792.8284         | 15 |
| 9  | 1068.5724       | 534.7898        | 1051.5459      | 526.2766         | 1050.5619      | 525.7846         | S    | <b>1439.5968</b> | 720.3020        | 1422.5703      | 711.7888         | <b>1421.5863</b> | 711.2968         | 14 |
| 10 | 1125.5939       | <b>563.3006</b> | 1108.5673      | 554.7873         | 1107.5833      | 554.2953         | G    | <b>1352.5648</b> | 676.7860        | 1335.5382      | 668.2728         | 1334.5542        | 667.7808         | 13 |
| 11 | 1226.6416       | 613.8244        | 1209.6150      | 605.3111         | 1208.6310      | 604.8191         | T    | <b>1295.5433</b> | 648.2753        | 1278.5168      | 639.7620         | 1277.5328        | 639.2700         | 12 |
| 12 | 1297.6787       | 649.3430        | 1280.6521      | 640.8297         | 1279.6681      | 640.3377         | A    | <b>1194.4956</b> | 597.7515        | 1177.4691      | 589.2382         | 1176.4851        | 588.7462         | 11 |
| 13 | 1354.7001       | 677.8537        | 1337.6736      | 669.3404         | 1336.6896      | 668.8484         | G    | <b>1123.4585</b> | 562.2329        | 1106.4320      | 553.7196         | 1105.4480        | 553.2276         | 10 |
| 14 | 1469.7271       | 735.3672        | 1452.7005      | 726.8539         | 1451.7165      | 726.3619         | D    | 1066.4371        | <b>533.7222</b> | 1049.4105      | 525.2089         | 1048.4265        | 524.7169         | 9  |
| 15 | 1556.7591       | 778.8832        | 1539.7326      | 770.3699         | 1538.7486      | 769.8779         | S    | <b>951.4101</b>  | <b>476.2087</b> | 934.3836       | 467.6954         | 933.3996         | 467.2034         | 8  |
| 16 | 1703.7945       | 852.4009        | 1686.7680      | 843.8876         | 1685.7840      | 843.3956         | M    | 864.3781         | 432.6927        | 847.3515       | 424.1794         |                  |                  | 7  |
| 17 | 1774.8316       | 887.9195        | 1757.8051      | 879.4062         | 1756.8211      | 878.9142         | A    | <b>717.3427</b>  | 359.1750        | 700.3161       | 350.6617         |                  |                  | 6  |
| 18 | 1937.8950       | 969.4511        | 1920.8684      | 960.9378         | 1919.8844      | 960.4458         | Y    | 646.3056         | <b>323.6564</b> | 629.2790       | 315.1432         |                  |                  | 5  |

|    |           |           |           |           |           |           |   |          |          |          |          |  |  |   |
|----|-----------|-----------|-----------|-----------|-----------|-----------|---|----------|----------|----------|----------|--|--|---|
| 19 | 2074.9539 | 1037.9806 | 2057.9273 | 1029.4673 | 2056.9433 | 1028.9753 | H | 483.2423 | 242.1248 | 466.2157 | 233.6115 |  |  | 4 |
| 20 | 2188.9968 | 1095.0020 | 2171.9702 | 1086.4888 | 2170.9862 | 1085.9968 | N | 346.1833 | 173.5953 | 329.1568 | 165.0820 |  |  | 3 |
| 21 | 2246.0183 | 1123.5128 | 2228.9917 | 1114.9995 | 2228.0077 | 1114.5075 | G | 232.1404 | 116.5738 | 215.1139 | 108.0606 |  |  | 2 |
| 22 |           |           |           |           |           |           | R | 175.1190 | 88.0631  | 158.0924 | 79.5498  |  |  | 1 |

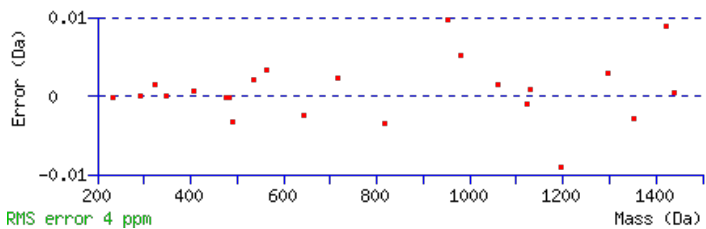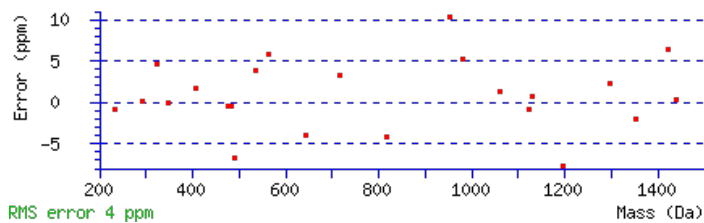

NCBI **BLAST** search of [YKLKVEGYSGTAGDSMAYHNGR](#)  
 (Parameters: blastp, nr protein database, expect=20000, no filter, PAM30)

Other BLAST [web gateways](#)

**All matches to this query**

| Score | Mr(calc)  | Delta   | Sequence                               |
|-------|-----------|---------|----------------------------------------|
| 28.2  | 2419.1226 | -0.0087 | <a href="#">YKLKVEGYSGTAGDSMAYHNGR</a> |

Mascot: <http://www.matrixscience.com/>

# Mascot Search Results

## Peptide View

MS/MS Fragmentation of **YKLVKVEGYSGTAGDSMAYHNGR**

Found in **P24821** in **uni\_human\_nr**, TENA\_HUMAN Tenascin OS=Homo sapiens GN=TNC PE=1 SV=3

Match to Query 13834: 2403.122016 from(601.787780,4+) intensity(18476948.0000) rtinseconds(1306) scans(6589) index(4499)

Title: 130806\_HPL\_Human\_Plaque\_BR1\_TR2\_02\_Spectrum029203\_scans\_6589\_RTINSECONDS=1306

Data file E:\\RAW\\HumanPlaques\\imgf\\T\\1D\\T130806\_HPL\_Human\_Plaque\_BR1\_TR2\_02.mgf

Click mouse within plot area to zoom in by factor of two about that point

Or,  to  Da

Label all possible matches  Label matches used for scoring

Show Y-axis

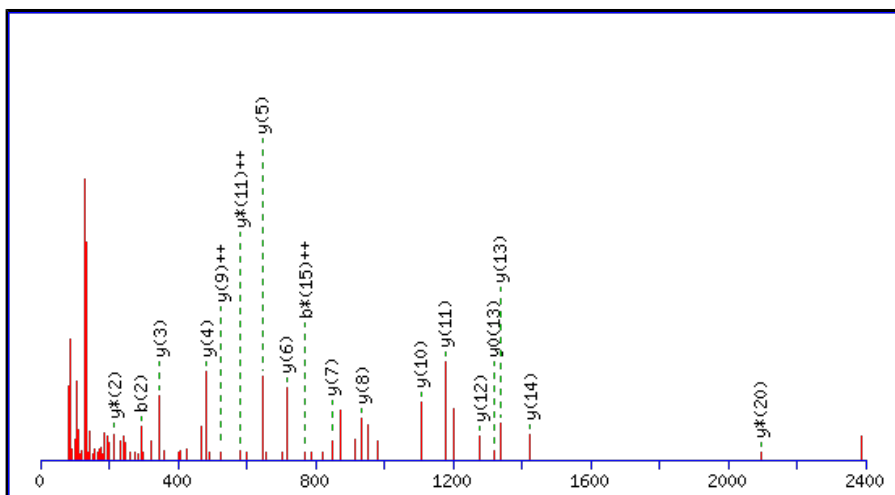

Monoisotopic mass of neutral peptide **Mr(calc):** 2403.1277

**Fixed modifications:** Carbamidomethyl (C) (apply to specified residues or termini only)

**Ions Score:** 79 **Expect:** 8.6e-007

**Matches :** 18/226 fragment ions using 27 most intense peaks ([help](#))

| #  | b               | b <sup>++</sup> | b*        | b <sup>*++</sup> | b <sup>0</sup> | b <sup>0++</sup> | Seq. | y                | y <sup>++</sup> | y*               | y <sup>*++</sup> | y <sup>0</sup>   | y <sup>0++</sup> | #  |
|----|-----------------|-----------------|-----------|------------------|----------------|------------------|------|------------------|-----------------|------------------|------------------|------------------|------------------|----|
| 1  | 164.0706        | 82.5389         |           |                  |                |                  | Y    |                  |                 |                  |                  |                  |                  | 22 |
| 2  | <b>292.1656</b> | 146.5864        | 275.1390  | 138.0731         |                |                  | K    | 2241.0717        | 1121.0395       | 2224.0451        | 1112.5262        | 2223.0611        | 1112.0342        | 21 |
| 3  | 405.2496        | 203.1285        | 388.2231  | 194.6152         |                |                  | L    | 2112.9767        | 1056.9920       | <b>2095.9502</b> | 1048.4787        | 2094.9662        | 1047.9867        | 20 |
| 4  | 533.3446        | 267.1759        | 516.3180  | 258.6627         |                |                  | K    | 1999.8927        | 1000.4500       | 1982.8661        | 991.9367         | 1981.8821        | 991.4447         | 19 |
| 5  | 632.4130        | 316.7101        | 615.3865  | 308.1969         |                |                  | V    | 1871.7977        | 936.4025        | 1854.7712        | 927.8892         | 1853.7871        | 927.3972         | 18 |
| 6  | 761.4556        | 381.2314        | 744.4291  | 372.7182         | 743.4450       | 372.2262         | E    | 1772.7293        | 886.8683        | 1755.7027        | 878.3550         | 1754.7187        | 877.8630         | 17 |
| 7  | 818.4771        | 409.7422        | 801.4505  | 401.2289         | 800.4665       | 400.7369         | G    | 1643.6867        | 822.3470        | 1626.6601        | 813.8337         | 1625.6761        | 813.3417         | 16 |
| 8  | 981.5404        | 491.2738        | 964.5138  | 482.7606         | 963.5298       | 482.2686         | Y    | 1586.6652        | 793.8363        | 1569.6387        | 785.3230         | 1568.6547        | 784.8310         | 15 |
| 9  | 1068.5724       | 534.7898        | 1051.5459 | 526.2766         | 1050.5619      | 525.7846         | S    | <b>1423.6019</b> | 712.3046        | 1406.5754        | 703.7913         | 1405.5913        | 703.2993         | 14 |
| 10 | 1125.5939       | 563.3006        | 1108.5673 | 554.7873         | 1107.5833      | 554.2953         | G    | <b>1336.5699</b> | 668.7886        | 1319.5433        | 660.2753         | <b>1318.5593</b> | 659.7833         | 13 |
| 11 | 1226.6416       | 613.8244        | 1209.6150 | 605.3111         | 1208.6310      | 604.8191         | T    | <b>1279.5484</b> | 640.2778        | 1262.5219        | 631.7646         | 1261.5378        | 631.2726         | 12 |
| 12 | 1297.6787       | 649.3430        | 1280.6521 | 640.8297         | 1279.6681      | 640.3377         | A    | <b>1178.5007</b> | 589.7540        | 1161.4742        | <b>581.2407</b>  | 1160.4902        | 580.7487         | 11 |
| 13 | 1354.7001       | 677.8537        | 1337.6736 | 669.3404         | 1336.6896      | 668.8484         | G    | <b>1107.4636</b> | 554.2354        | 1090.4371        | 545.7222         | 1089.4531        | 545.2302         | 10 |
| 14 | 1469.7271       | 735.3672        | 1452.7005 | 726.8539         | 1451.7165      | 726.3619         | D    | 1050.4422        | <b>525.7247</b> | 1033.4156        | 517.2114         | 1032.4316        | 516.7194         | 9  |
| 15 | 1556.7591       | 778.8832        | 1539.7326 | <b>770.3699</b>  | 1538.7486      | 769.8779         | S    | <b>935.4152</b>  | 468.2112        | 918.3887         | 459.6980         | 917.4046         | 459.2060         | 8  |
| 16 | 1687.7996       | 844.4034        | 1670.7731 | 835.8902         | 1669.7890      | 835.3982         | M    | <b>848.3832</b>  | 424.6952        | 831.3566         | 416.1820         |                  |                  | 7  |
| 17 | 1758.8367       | 879.9220        | 1741.8102 | 871.4087         | 1740.8261      | 870.9167         | A    | <b>717.3427</b>  | 359.1750        | 700.3161         | 350.6617         |                  |                  | 6  |
| 18 | 1921.9000       | 961.4537        | 1904.8735 | 952.9404         | 1903.8895      | 952.4484         | Y    | <b>646.3056</b>  | 323.6564        | 629.2790         | 315.1432         |                  |                  | 5  |
| 19 | 2058.9590       | 1029.9831       | 2041.9324 | 1021.4698        | 2040.9484      | 1020.9778        | H    | <b>483.2423</b>  | 242.1248        | 466.2157         | 233.6115         |                  |                  | 4  |

|    |           |           |           |           |           |           |   |          |          |          |          |  |  |   |
|----|-----------|-----------|-----------|-----------|-----------|-----------|---|----------|----------|----------|----------|--|--|---|
| 20 | 2173.0019 | 1087.0046 | 2155.9753 | 1078.4913 | 2154.9913 | 1077.9993 | N | 346.1833 | 173.5953 | 329.1568 | 165.0820 |  |  | 3 |
| 21 | 2230.0233 | 1115.5153 | 2212.9968 | 1107.0020 | 2212.0128 | 1106.5100 | G | 232.1404 | 116.5738 | 215.1139 | 108.0606 |  |  | 2 |
| 22 |           |           |           |           |           |           | R | 175.1190 | 88.0631  | 158.0924 | 79.5498  |  |  | 1 |

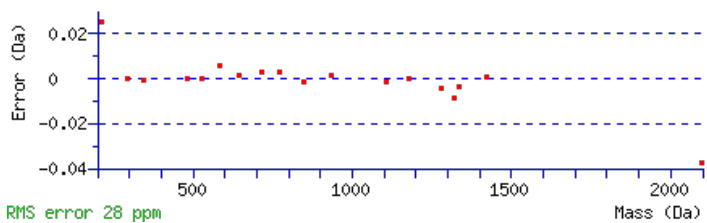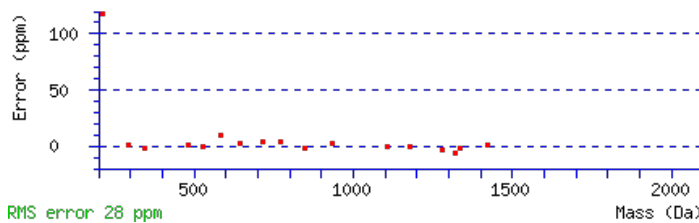

NCBI BLAST search of [YKLKVEGYSGTAGDSMAYHNGR](#)  
 (Parameters: blastp, nr protein database, expect=20000, no filter, PAM30)

Other BLAST [web gateways](#)

All matches to this query

| Score | Mr(calc)  | Delta   | Sequence                               |
|-------|-----------|---------|----------------------------------------|
| 79.0  | 2403.1277 | -0.0057 | <a href="#">YKLKVEGYSGTAGDSMAYHNGR</a> |
| 1.0   | 2401.1082 | 2.0138  | <a href="#">KGEMLNTEFCGSPPYAAPELER</a> |

Mascot: <http://www.matrixscience.com/>

# Mascot Search Results

## Peptide View

MS/MS Fragmentation of **GALCLLAEDDSSCEVNGR**

Found in **O76076** in **uni\_human\_nr**, WISP2\_HUMAN WNT1-inducible-signaling pathway protein 2 OS=Homo sapiens GN=WISP2 PE=1 SV=1

Match to Query 8558: 1965.842868 from(983.928710,2+) intensity(1426114.8750) rtinseconds(2284) scans(12457) index(9601)

Title: 130809\_HPL\_Human\_Plaque\_BR2\_TR3\_20\_Spectrum028790\_scans\_\_12457\_RTINSECONDS=2284

Data file E:\RAW\HumanPlaques\mgf\T\1D\T130809\_HPL\_Human\_Plaque\_BR2\_TR3\_20.mgf

Click mouse within plot area to zoom in by factor of two about that point

Or,  to  Da

Label all possible matches  Label matches used for scoring

Show Y-axis

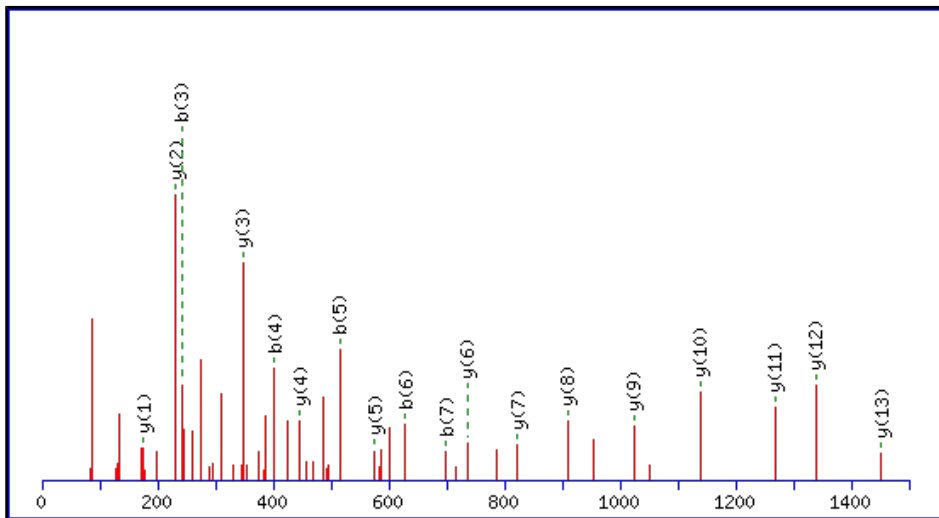

**Monoisotopic mass of neutral peptide Mr(calc):** 1965.8408

**Fixed modifications:** Carbamidomethyl (C) (apply to specified residues or termini only)

**Variable modifications:**

N16 : Deamidated (NQ)

**Ions Score:** 99 **Expect:** 2.7e-009

**Matches :** 18/152 fragment ions using 31 most intense peaks ([help](#))

| #  | b               | b <sup>++</sup> | b <sup>*</sup> | b <sup>*++</sup> | b <sup>0</sup> | b <sup>0++</sup> | Seq. | y                | y <sup>++</sup> | y <sup>*</sup> | y <sup>*++</sup> | y <sup>0</sup> | y <sup>0++</sup> | #  |
|----|-----------------|-----------------|----------------|------------------|----------------|------------------|------|------------------|-----------------|----------------|------------------|----------------|------------------|----|
| 1  | 58.0287         | 29.5180         |                |                  |                |                  | G    |                  |                 |                |                  |                |                  | 18 |
| 2  | 129.0659        | 65.0366         |                |                  |                |                  | A    | 1909.8266        | 955.4169        | 1892.8001      | 946.9037         | 1891.8161      | 946.4117         | 17 |
| 3  | <b>242.1499</b> | 121.5786        |                |                  |                |                  | L    | 1838.7895        | 919.8984        | 1821.7630      | 911.3851         | 1820.7789      | 910.8931         | 16 |
| 4  | <b>402.1806</b> | 201.5939        |                |                  |                |                  | C    | 1725.7054        | 863.3564        | 1708.6789      | 854.8431         | 1707.6949      | 854.3511         | 15 |
| 5  | <b>515.2646</b> | 258.1360        |                |                  |                |                  | L    | 1565.6748        | 783.3410        | 1548.6482      | 774.8278         | 1547.6642      | 774.3358         | 14 |
| 6  | <b>628.3487</b> | 314.6780        |                |                  |                |                  | L    | <b>1452.5907</b> | 726.7990        | 1435.5642      | 718.2857         | 1434.5802      | 717.7937         | 13 |
| 7  | <b>699.3858</b> | 350.1965        |                |                  |                |                  | A    | <b>1339.5067</b> | 670.2570        | 1322.4801      | 661.7437         | 1321.4961      | 661.2517         | 12 |
| 8  | 828.4284        | 414.7178        |                |                  | 810.4178       | 405.7126         | E    | <b>1268.4696</b> | 634.7384        | 1251.4430      | 626.2251         | 1250.4590      | 625.7331         | 11 |
| 9  | 943.4553        | 472.2313        |                |                  | 925.4448       | 463.2260         | D    | <b>1139.4270</b> | 570.2171        | 1122.4004      | 561.7038         | 1121.4164      | 561.2118         | 10 |
| 10 | 1058.4823       | 529.7448        |                |                  | 1040.4717      | 520.7395         | D    | <b>1024.4000</b> | 512.7036        | 1007.3735      | 504.1904         | 1006.3894      | 503.6984         | 9  |
| 11 | 1145.5143       | 573.2608        |                |                  | 1127.5038      | 564.2555         | S    | <b>909.3731</b>  | 455.1902        | 892.3465       | 446.6769         | 891.3625       | 446.1849         | 8  |
| 12 | 1232.5463       | 616.7768        |                |                  | 1214.5358      | 607.7715         | S    | <b>822.3410</b>  | 411.6742        | 805.3145       | 403.1609         | 804.3305       | 402.6689         | 7  |
| 13 | 1392.5770       | 696.7921        |                |                  | 1374.5664      | 687.7869         | C    | <b>735.3090</b>  | 368.1581        | 718.2825       | 359.6449         | 717.2985       | 359.1529         | 6  |
| 14 | 1521.6196       | 761.3134        |                |                  | 1503.6090      | 752.3081         | E    | <b>575.2784</b>  | 288.1428        | 558.2518       | 279.6295         | 557.2678       | 279.1375         | 5  |
| 15 | 1620.6880       | 810.8476        |                |                  | 1602.6774      | 801.8424         | V    | <b>446.2358</b>  | 223.6215        | 429.2092       | 215.1083         |                |                  | 4  |

|    |           |          |           |          |           |          |   |          |          |          |          |  |  |   |
|----|-----------|----------|-----------|----------|-----------|----------|---|----------|----------|----------|----------|--|--|---|
| 16 | 1735.7149 | 868.3611 | 1718.6884 | 859.8478 | 1717.7044 | 859.3558 | N | 347.1674 | 174.0873 | 330.1408 | 165.5740 |  |  | 3 |
| 17 | 1792.7364 | 896.8718 | 1775.7099 | 888.3586 | 1774.7258 | 887.8666 | G | 232.1404 | 116.5738 | 215.1139 | 108.0606 |  |  | 2 |
| 18 |           |          |           |          |           |          | R | 175.1190 | 88.0631  | 158.0924 | 79.5498  |  |  | 1 |

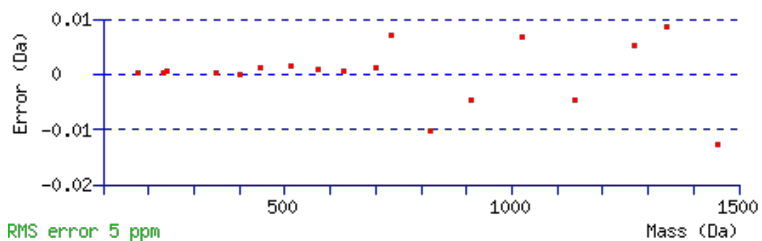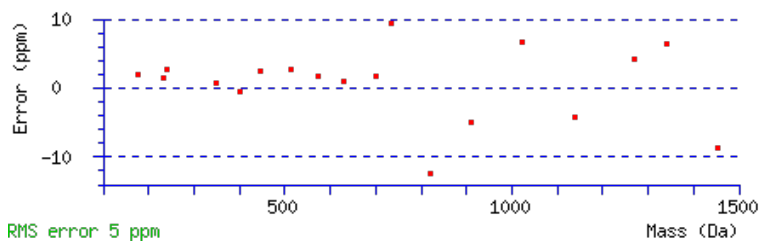

NCBI **BLAST** search of [GALCLLAEDDSSCEVNGR](#)  
 (Parameters: blastp, nr protein database, expect=20000, no filter, PAM30)  
 Other BLAST [web gateways](#)

**All matches to this query**

| Score | Mr(calc)  | Delta  | Sequence                           |
|-------|-----------|--------|------------------------------------|
| 98.8  | 1965.8408 | 0.0021 | <a href="#">GALCLLAEDDSSCEVNGR</a> |

Mascot: <http://www.matrixscience.com/>

# Mascot Search Results

## Peptide View

MS/MS Fragmentation of **GALCLLAEDDSSCEVNGR**

Found in **O76076** in **uni\_human\_nr**, WISP2\_HUMAN WNT1-inducible-signaling pathway protein 2 OS=Homo sapiens GN=WISP2 PE=1 SV=1

Match to Query 8482: 1965.844272 from(656.288700,3+) intensity(146933.0781) rtinseconds(2277) scans(12304) index(9435)

Title: 130801\_HPL\_Human\_Plaque\_BR2\_TR1\_20\_Spectrum028337\_scans\_\_12304\_RTINSECONDS=2277

Data file E:\RAW\HumanPlaques\mgf\T\1D\T130801\_HPL\_Human\_Plaque\_BR2\_TR1\_20.mgf

Click mouse within plot area to zoom in by factor of two about that point

Or,  to  Da

Label all possible matches  Label matches used for scoring

Show Y-axis

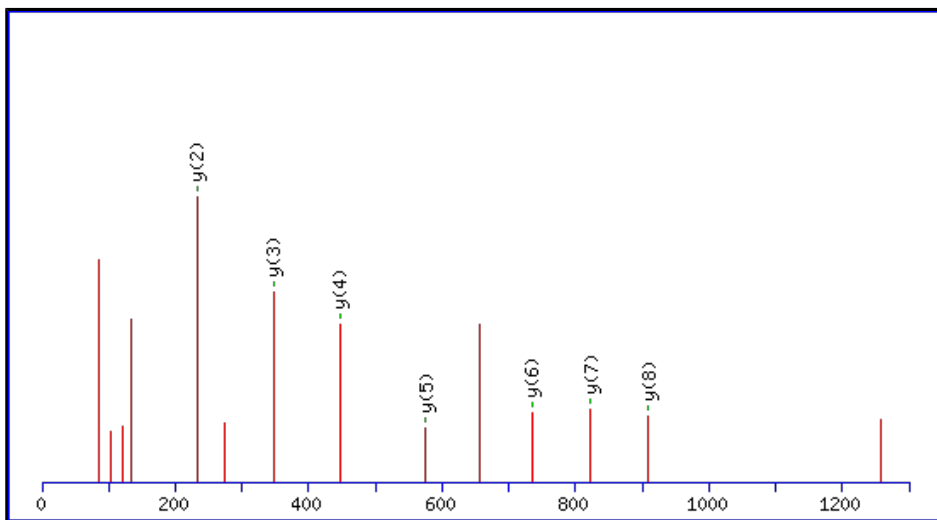

**Monoisotopic mass of neutral peptide Mr(calc):** 1965.8408

**Fixed modifications:** Carbamidomethyl (C) (apply to specified residues or termini only)

**Variable modifications:**

**N16** : Deamidated (NQ)

**Ions Score:** 52 **Expect:** 0.00014

**Matches** : 7/152 fragment ions using 10 most intense peaks ([help](#))

| #  | b         | b <sup>++</sup> | b* | b <sup>*++</sup> | b <sup>0</sup> | b <sup>0++</sup> | Seq.     | y               | y <sup>++</sup> | y*        | y <sup>*++</sup> | y <sup>0</sup> | y <sup>0++</sup> | #         |
|----|-----------|-----------------|----|------------------|----------------|------------------|----------|-----------------|-----------------|-----------|------------------|----------------|------------------|-----------|
| 1  | 58.0287   | 29.5180         |    |                  |                |                  | <b>G</b> |                 |                 |           |                  |                |                  | <b>18</b> |
| 2  | 129.0659  | 65.0366         |    |                  |                |                  | <b>A</b> | 1909.8266       | 955.4169        | 1892.8001 | 946.9037         | 1891.8161      | 946.4117         | <b>17</b> |
| 3  | 242.1499  | 121.5786        |    |                  |                |                  | <b>L</b> | 1838.7895       | 919.8984        | 1821.7630 | 911.3851         | 1820.7789      | 910.8931         | <b>16</b> |
| 4  | 402.1806  | 201.5939        |    |                  |                |                  | <b>C</b> | 1725.7054       | 863.3564        | 1708.6789 | 854.8431         | 1707.6949      | 854.3511         | <b>15</b> |
| 5  | 515.2646  | 258.1360        |    |                  |                |                  | <b>L</b> | 1565.6748       | 783.3410        | 1548.6482 | 774.8278         | 1547.6642      | 774.3358         | <b>14</b> |
| 6  | 628.3487  | 314.6780        |    |                  |                |                  | <b>L</b> | 1452.5907       | 726.7990        | 1435.5642 | 718.2857         | 1434.5802      | 717.7937         | <b>13</b> |
| 7  | 699.3858  | 350.1965        |    |                  |                |                  | <b>A</b> | 1339.5067       | 670.2570        | 1322.4801 | 661.7437         | 1321.4961      | 661.2517         | <b>12</b> |
| 8  | 828.4284  | 414.7178        |    |                  | 810.4178       | 405.7126         | <b>E</b> | 1268.4696       | 634.7384        | 1251.4430 | 626.2251         | 1250.4590      | 625.7331         | <b>11</b> |
| 9  | 943.4553  | 472.2313        |    |                  | 925.4448       | 463.2260         | <b>D</b> | 1139.4270       | 570.2171        | 1122.4004 | 561.7038         | 1121.4164      | 561.2118         | <b>10</b> |
| 10 | 1058.4823 | 529.7448        |    |                  | 1040.4717      | 520.7395         | <b>D</b> | 1024.4000       | 512.7036        | 1007.3735 | 504.1904         | 1006.3894      | 503.6984         | <b>9</b>  |
| 11 | 1145.5143 | 573.2608        |    |                  | 1127.5038      | 564.2555         | <b>S</b> | <b>909.3731</b> | 455.1902        | 892.3465  | 446.6769         | 891.3625       | 446.1849         | <b>8</b>  |
| 12 | 1232.5463 | 616.7768        |    |                  | 1214.5358      | 607.7715         | <b>S</b> | <b>822.3410</b> | 411.6742        | 805.3145  | 403.1609         | 804.3305       | 402.6689         | <b>7</b>  |
| 13 | 1392.5770 | 696.7921        |    |                  | 1374.5664      | 687.7869         | <b>C</b> | <b>735.3090</b> | 368.1581        | 718.2825  | 359.6449         | 717.2985       | 359.1529         | <b>6</b>  |
| 14 | 1521.6196 | 761.3134        |    |                  | 1503.6090      | 752.3081         | <b>E</b> | <b>575.2784</b> | 288.1428        | 558.2518  | 279.6295         | 557.2678       | 279.1375         | <b>5</b>  |
| 15 | 1620.6880 | 810.8476        |    |                  | 1602.6774      | 801.8424         | <b>V</b> | <b>446.2358</b> | 223.6215        | 429.2092  | 215.1083         |                |                  | <b>4</b>  |



|    |           |          |           |          |           |          |   |          |          |          |          |  |  |   |
|----|-----------|----------|-----------|----------|-----------|----------|---|----------|----------|----------|----------|--|--|---|
| 16 | 1735.7149 | 868.3611 | 1718.6884 | 859.8478 | 1717.7044 | 859.3558 | N | 347.1674 | 174.0873 | 330.1408 | 165.5740 |  |  | 3 |
| 17 | 1792.7364 | 896.8718 | 1775.7099 | 888.3586 | 1774.7258 | 887.8666 | G | 232.1404 | 116.5738 | 215.1139 | 108.0606 |  |  | 2 |
| 18 |           |          |           |          |           |          | R | 175.1190 | 88.0631  | 158.0924 | 79.5498  |  |  | 1 |

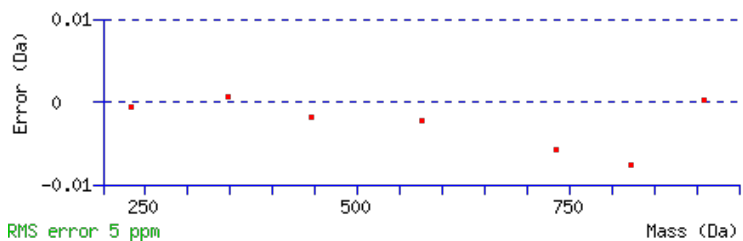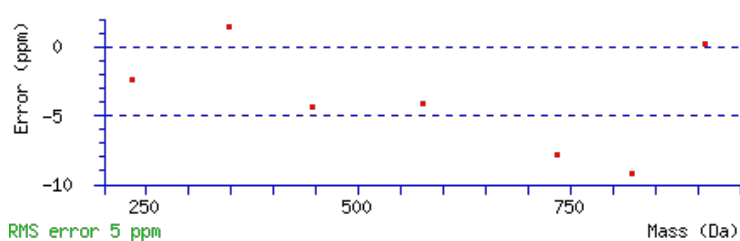

NCBI BLAST search of [GALCLLAEDDSSCEVNGR](#)  
 (Parameters: blastp, nr protein database, expect=20000, no filter, PAM30)  
 Other BLAST [web gateways](#)

All matches to this query

| Score | Mr(calc)  | Delta  | Sequence                           |
|-------|-----------|--------|------------------------------------|
| 52.0  | 1965.8408 | 0.0035 | <a href="#">GALCLLAEDDSSCEVNGR</a> |
| 0.3   | 1963.8370 | 2.0073 | <a href="#">NFQQYDLCIHAQNGR</a>    |
| 0.3   | 1963.8370 | 2.0073 | <a href="#">NFQQYDLCIHAQNGR</a>    |
| 0.3   | 1963.8370 | 2.0073 | <a href="#">NFQQYDLCIHAQNGR</a>    |
| 0.1   | 1963.8370 | 2.0073 | <a href="#">NFQQYDLCIHAQNGR</a>    |

Mascot: <http://www.matrixscience.com/>

# Mascot Search Results

## Peptide View

MS/MS Fragmentation of **GALCLLAEDDSSCEVNGR**

Found in **O76076** in **uni\_human\_nr**, WISP2\_HUMAN WNT1-inducible-signaling pathway protein 2 OS=Homo sapiens GN=WISP2 PE=1 SV=1

Match to Query 6649: 1964.855688 from(983.435120,2+) intensity(2660228.7500) rtinseconds(2179) scans(11708) index(8578)

Title: 130806\_HPL\_Human\_Plaque\_BR1\_TR2\_16\_Spectrum028599\_scans\_\_11708\_RTINSECONDS=2179

Data file E:\RAW\HumanPlaques\mgf\T\1D\T130806\_HPL\_Human\_Plaque\_BR1\_TR2\_16.mgf

Click mouse within plot area to zoom in by factor of two about that point

Or,  to  Da

Label all possible matches  Label matches used for scoring

Show Y-axis

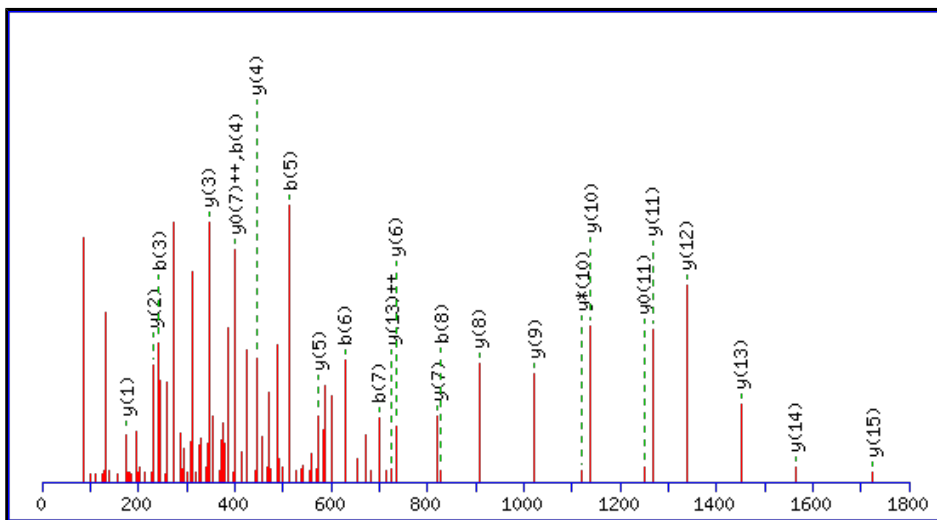

**Monoisotopic mass of neutral peptide Mr(calc):** 1964.8568

**Fixed modifications:** Carbamidomethyl (C) (apply to specified residues or termini only)

**Ions Score:** 121 **Expect:** 2.6e-011

**Matches :** 25/152 fragment ions using 40 most intense peaks ([help](#))

| #  | b               | b <sup>++</sup> | b <sup>*</sup> | b <sup>*++</sup> | b <sup>0</sup> | b <sup>0++</sup> | Seq. | y                | y <sup>++</sup> | y <sup>*</sup>   | y <sup>*++</sup> | y <sup>0</sup>   | y <sup>0++</sup> | #  |
|----|-----------------|-----------------|----------------|------------------|----------------|------------------|------|------------------|-----------------|------------------|------------------|------------------|------------------|----|
| 1  | 58.0287         | 29.5180         |                |                  |                |                  | G    |                  |                 |                  |                  |                  |                  | 18 |
| 2  | 129.0659        | 65.0366         |                |                  |                |                  | A    | 1908.8426        | 954.9249        | 1891.8161        | 946.4117         | 1890.8320        | 945.9197         | 17 |
| 3  | <b>242.1499</b> | 121.5786        |                |                  |                |                  | L    | 1837.8055        | 919.4064        | 1820.7789        | 910.8931         | 1819.7949        | 910.4011         | 16 |
| 4  | <b>402.1806</b> | 201.5939        |                |                  |                |                  | C    | <b>1724.7214</b> | 862.8644        | 1707.6949        | 854.3511         | 1706.7109        | 853.8591         | 15 |
| 5  | <b>515.2646</b> | 258.1360        |                |                  |                |                  | L    | <b>1564.6908</b> | 782.8490        | 1547.6642        | 774.3358         | 1546.6802        | 773.8437         | 14 |
| 6  | <b>628.3487</b> | 314.6780        |                |                  |                |                  | L    | <b>1451.6067</b> | <b>726.3070</b> | 1434.5802        | 717.7937         | 1433.5961        | 717.3017         | 13 |
| 7  | <b>699.3858</b> | 350.1965        |                |                  |                |                  | A    | <b>1338.5226</b> | 669.7650        | 1321.4961        | 661.2517         | 1320.5121        | 660.7597         | 12 |
| 8  | <b>828.4284</b> | 414.7178        |                |                  | 810.4178       | 405.7126         | E    | <b>1267.4855</b> | 634.2464        | 1250.4590        | 625.7331         | <b>1249.4750</b> | 625.2411         | 11 |
| 9  | 943.4553        | 472.2313        |                |                  | 925.4448       | 463.2260         | D    | <b>1138.4429</b> | 569.7251        | <b>1121.4164</b> | 561.2118         | 1120.4324        | 560.7198         | 10 |
| 10 | 1058.4823       | 529.7448        |                |                  | 1040.4717      | 520.7395         | D    | <b>1023.4160</b> | 512.2116        | 1006.3894        | 503.6984         | 1005.4054        | 503.2064         | 9  |
| 11 | 1145.5143       | 573.2608        |                |                  | 1127.5038      | 564.2555         | S    | <b>908.3891</b>  | 454.6982        | 891.3625         | 446.1849         | 890.3785         | 445.6929         | 8  |
| 12 | 1232.5463       | 616.7768        |                |                  | 1214.5358      | 607.7715         | S    | <b>821.3570</b>  | 411.1822        | 804.3305         | 402.6689         | 803.3465         | <b>402.1769</b>  | 7  |
| 13 | 1392.5770       | 696.7921        |                |                  | 1374.5664      | 687.7869         | C    | <b>734.3250</b>  | 367.6661        | 717.2985         | 359.1529         | 716.3144         | 358.6609         | 6  |
| 14 | 1521.6196       | 761.3134        |                |                  | 1503.6090      | 752.3081         | E    | <b>574.2944</b>  | 287.6508        | 557.2678         | 279.1375         | 556.2838         | 278.6455         | 5  |
| 15 | 1620.6880       | 810.8476        |                |                  | 1602.6774      | 801.8424         | V    | <b>445.2518</b>  | 223.1295        | 428.2252         | 214.6162         |                  |                  | 4  |
| 16 | 1734.7309       | 867.8691        | 1717.7044      | 859.3558         | 1716.7204      | 858.8638         | N    | <b>346.1833</b>  | 173.5953        | 329.1568         | 165.0820         |                  |                  | 3  |

|    |           |          |           |          |           |          |   |          |          |          |          |  |  |   |
|----|-----------|----------|-----------|----------|-----------|----------|---|----------|----------|----------|----------|--|--|---|
| 17 | 1791.7524 | 896.3798 | 1774.7258 | 887.8666 | 1773.7418 | 887.3746 | G | 232.1404 | 116.5738 | 215.1139 | 108.0606 |  |  | 2 |
| 18 |           |          |           |          |           |          | R | 175.1190 | 88.0631  | 158.0924 | 79.5498  |  |  | 1 |

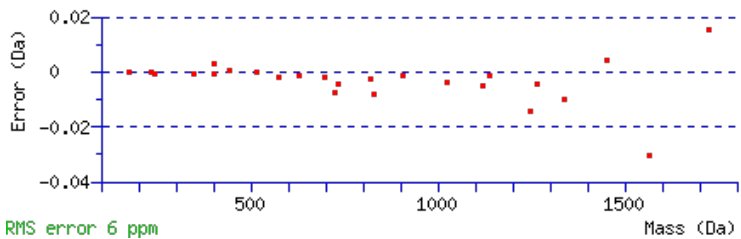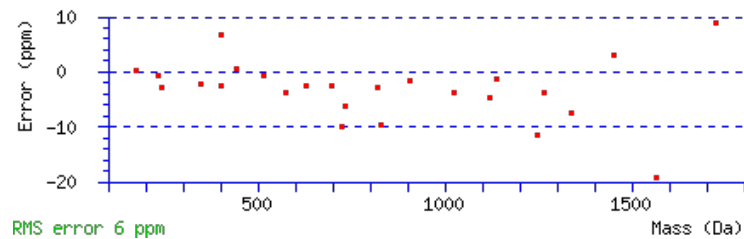

NCBI BLAST search of [GALCLLAEDDSSCEVNGR](#)  
 (Parameters: blastp, nr protein database, expect=20000, no filter, PAM30)  
 Other BLAST [web gateways](#)

All matches to this query

| Score | Mr(calc)  | Delta   | Sequence                           |
|-------|-----------|---------|------------------------------------|
| 120.7 | 1964.8568 | -0.0011 | <a href="#">GALCLLAEDDSSCEVNGR</a> |

Mascot: <http://www.matrixscience.com/>

# Mascot Search Results

## Peptide View

MS/MS Fragmentation of **GALCLLAEDDSSCEVNGR**

Found in **O76076** in **uni\_human\_nr**, WISP2\_HUMAN WNT1-inducible-signaling pathway protein 2 OS=Homo sapiens GN=WISP2 PE=1 SV=1

Match to Query 7517: 1964.857152 from(655.959660,3+) intensity(9374259.0000) rtinseconds(2158) scans(11659) index(8628)

Title: 130809\_HPL\_Human\_Plaque\_BR2\_TR3\_15\_Spectrum028783\_scans\_\_11659\_RTINSECONDS=2158

Data file E:\RAW\HumanPlaques\mgf\T\1D\T130809\_HPL\_Human\_Plaque\_BR2\_TR3\_15.mgf

Click mouse within plot area to zoom in by factor of two about that point

Or,  to  Da

Label all possible matches  Label matches used for scoring

Show Y-axis

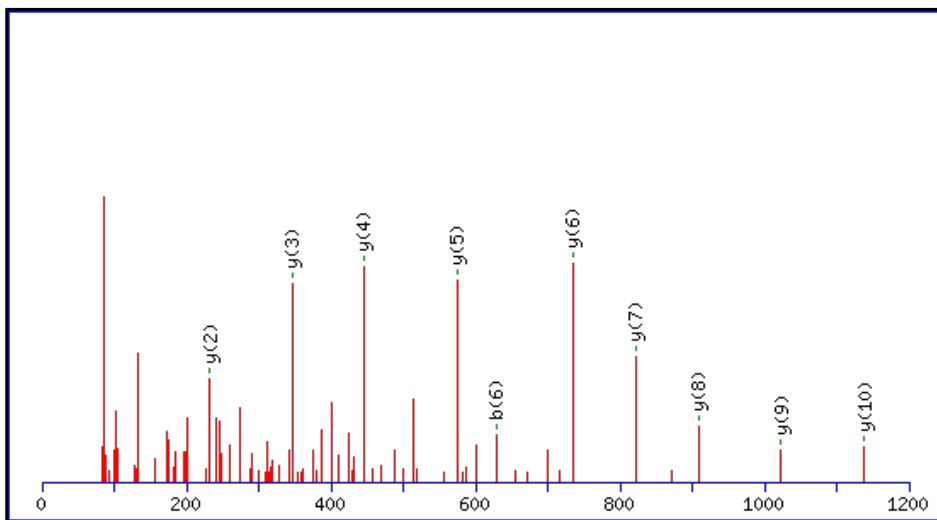

Monoisotopic mass of neutral peptide **Mr(calc)**: 1964.8568

Fixed modifications: Carbamidomethyl (C) (apply to specified residues or termini only)

Ions Score: 84 Expect: 1.2e-007

Matches : 10/152 fragment ions using 11 most intense peaks ([help](#))

| #  | b               | b <sup>++</sup> | b*        | b <sup>***</sup> | b <sup>0</sup> | b <sup>0++</sup> | Seq.     | y                | y <sup>++</sup> | y*        | y <sup>***</sup> | y <sup>0</sup> | y <sup>0++</sup> | #         |
|----|-----------------|-----------------|-----------|------------------|----------------|------------------|----------|------------------|-----------------|-----------|------------------|----------------|------------------|-----------|
| 1  | 58.0287         | 29.5180         |           |                  |                |                  | <b>G</b> |                  |                 |           |                  |                |                  | <b>18</b> |
| 2  | 129.0659        | 65.0366         |           |                  |                |                  | <b>A</b> | 1908.8426        | 954.9249        | 1891.8161 | 946.4117         | 1890.8320      | 945.9197         | <b>17</b> |
| 3  | 242.1499        | 121.5786        |           |                  |                |                  | <b>L</b> | 1837.8055        | 919.4064        | 1820.7789 | 910.8931         | 1819.7949      | 910.4011         | <b>16</b> |
| 4  | 402.1806        | 201.5939        |           |                  |                |                  | <b>C</b> | 1724.7214        | 862.8644        | 1707.6949 | 854.3511         | 1706.7109      | 853.8591         | <b>15</b> |
| 5  | 515.2646        | 258.1360        |           |                  |                |                  | <b>L</b> | 1564.6908        | 782.8490        | 1547.6642 | 774.3358         | 1546.6802      | 773.8437         | <b>14</b> |
| 6  | <b>628.3487</b> | 314.6780        |           |                  |                |                  | <b>L</b> | 1451.6067        | 726.3070        | 1434.5802 | 717.7937         | 1433.5961      | 717.3017         | <b>13</b> |
| 7  | 699.3858        | 350.1965        |           |                  |                |                  | <b>A</b> | 1338.5226        | 669.7650        | 1321.4961 | 661.2517         | 1320.5121      | 660.7597         | <b>12</b> |
| 8  | 828.4284        | 414.7178        |           |                  | 810.4178       | 405.7126         | <b>E</b> | 1267.4855        | 634.2464        | 1250.4590 | 625.7331         | 1249.4750      | 625.2411         | <b>11</b> |
| 9  | 943.4553        | 472.2313        |           |                  | 925.4448       | 463.2260         | <b>D</b> | <b>1138.4429</b> | 569.7251        | 1121.4164 | 561.2118         | 1120.4324      | 560.7198         | <b>10</b> |
| 10 | 1058.4823       | 529.7448        |           |                  | 1040.4717      | 520.7395         | <b>D</b> | <b>1023.4160</b> | 512.2116        | 1006.3894 | 503.6984         | 1005.4054      | 503.2064         | <b>9</b>  |
| 11 | 1145.5143       | 573.2608        |           |                  | 1127.5038      | 564.2555         | <b>S</b> | <b>908.3891</b>  | 454.6982        | 891.3625  | 446.1849         | 890.3785       | 445.6929         | <b>8</b>  |
| 12 | 1232.5463       | 616.7768        |           |                  | 1214.5358      | 607.7715         | <b>S</b> | <b>821.3570</b>  | 411.1822        | 804.3305  | 402.6689         | 803.3465       | 402.1769         | <b>7</b>  |
| 13 | 1392.5770       | 696.7921        |           |                  | 1374.5664      | 687.7869         | <b>C</b> | <b>734.3250</b>  | 367.6661        | 717.2985  | 359.1529         | 716.3144       | 358.6609         | <b>6</b>  |
| 14 | 1521.6196       | 761.3134        |           |                  | 1503.6090      | 752.3081         | <b>E</b> | <b>574.2944</b>  | 287.6508        | 557.2678  | 279.1375         | 556.2838       | 278.6455         | <b>5</b>  |
| 15 | 1620.6880       | 810.8476        |           |                  | 1602.6774      | 801.8424         | <b>V</b> | <b>445.2518</b>  | 223.1295        | 428.2252  | 214.6162         |                |                  | <b>4</b>  |
| 16 | 1734.7309       | 867.8691        | 1717.7044 | 859.3558         | 1716.7204      | 858.8638         | <b>N</b> | <b>346.1833</b>  | 173.5953        | 329.1568  | 165.0820         |                |                  | <b>3</b>  |

|    |           |          |           |          |           |          |   |          |          |          |          |  |  |   |
|----|-----------|----------|-----------|----------|-----------|----------|---|----------|----------|----------|----------|--|--|---|
| 17 | 1791.7524 | 896.3798 | 1774.7258 | 887.8666 | 1773.7418 | 887.3746 | G | 232.1404 | 116.5738 | 215.1139 | 108.0606 |  |  | 2 |
| 18 |           |          |           |          |           |          | R | 175.1190 | 88.0631  | 158.0924 | 79.5498  |  |  | 1 |

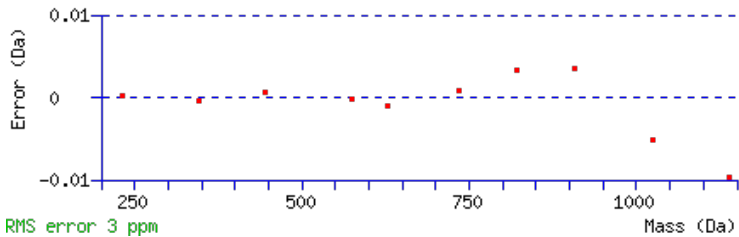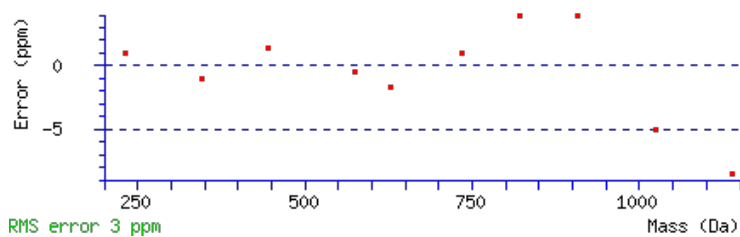

NCBI BLAST search of [GALCLLAEDDSSCEVNGR](#)  
 (Parameters: blastp, nr protein database, expect=20000, no filter, PAM30)  
 Other BLAST [web gateways](#)

All matches to this query

| Score | Mr(calc)  | Delta  | Sequence                           |
|-------|-----------|--------|------------------------------------|
| 83.8  | 1964.8568 | 0.0004 | <a href="#">GALCLLAEDDSSCEVNGR</a> |

Mascot: <http://www.matrixscience.com/>
